# Supplementary material for: CO from CO2and fluctuating renewable energy via formic-acid derivatives
Source: Royal Society of Chemistry journal article supplement (doi:10.1039/c6gc01202g), 2016-01-01
Supplement: c6gc01202g1.log [file c6gc01202g1.log]

 Entering Gaussian System, Link 0=/opt/mbfd/GAUSSIAN/LINUX64/g03.e01/g03
 Input=CO2_geopt_B3LYP_tzvp.com
 Output=CO2_geopt_B3LYP_tzvp.log
 Initial command:
 /opt/mbfd/GAUSSIAN/LINUX64/g03.e01/l1.exe /daten2/gaussianscratch/Gau-15205.inp -scrdir=/daten2/gaussianscratch/
 Entering Link 1 = /opt/mbfd/GAUSSIAN/LINUX64/g03.e01/l1.exe PID=     15209.
  
 Copyright (c) 1988,1990,1992,1993,1995,1998,2003,2004,2007, Gaussian, Inc.
                  All Rights Reserved.
  
 This is the Gaussian(R) 03 program.  It is based on the
 the Gaussian(R) 98 system (copyright 1998, Gaussian, Inc.),
 the Gaussian(R) 94 system (copyright 1995, Gaussian, Inc.),
 the Gaussian 92(TM) system (copyright 1992, Gaussian, Inc.),
 the Gaussian 90(TM) system (copyright 1990, Gaussian, Inc.),
 the Gaussian 88(TM) system (copyright 1988, Gaussian, Inc.),
 the Gaussian 86(TM) system (copyright 1986, Carnegie Mellon
 University), and the Gaussian 82(TM) system (copyright 1983,
 Carnegie Mellon University). Gaussian is a federally registered
 trademark of Gaussian, Inc.
  
 This software contains proprietary and confidential information,
 including trade secrets, belonging to Gaussian, Inc.
  
 This software is provided under written license and may be
 used, copied, transmitted, or stored only in accord with that
 written license.
  
 The following legend is applicable only to US Government
 contracts under FAR:
  
                    RESTRICTED RIGHTS LEGEND
  
 Use, reproduction and disclosure by the US Government is
 subject to restrictions as set forth in subparagraphs (a)
 and (c) of the Commercial Computer Software - Restricted
 Rights clause in FAR 52.227-19.
  
 Gaussian, Inc.
 340 Quinnipiac St., Bldg. 40, Wallingford CT 06492
  
  
 ---------------------------------------------------------------
 Warning -- This program may not be used in any manner that
 competes with the business of Gaussian, Inc. or will provide
 assistance to any competitor of Gaussian, Inc.  The licensee
 of this program is prohibited from giving any competitor of
 Gaussian, Inc. access to this program.  By using this program,
 the user acknowledges that Gaussian, Inc. is engaged in the
 business of creating and licensing software in the field of
 computational chemistry and represents and warrants to the
 licensee that it is not a competitor of Gaussian, Inc. and that
 it will not use this program in any manner prohibited above.
 ---------------------------------------------------------------
  

 Cite this work as:
 Gaussian 03, Revision E.01,
 M. J. Frisch, G. W. Trucks, H. B. Schlegel, G. E. Scuseria, 
 M. A. Robb, J. R. Cheeseman, J. A. Montgomery, Jr., T. Vreven, 
 K. N. Kudin, J. C. Burant, J. M. Millam, S. S. Iyengar, J. Tomasi, 
 V. Barone, B. Mennucci, M. Cossi, G. Scalmani, N. Rega, 
 G. A. Petersson, H. Nakatsuji, M. Hada, M. Ehara, K. Toyota, 
 R. Fukuda, J. Hasegawa, M. Ishida, T. Nakajima, Y. Honda, O. Kitao, 
 H. Nakai, M. Klene, X. Li, J. E. Knox, H. P. Hratchian, J. B. Cross, 
 V. Bakken, C. Adamo, J. Jaramillo, R. Gomperts, R. E. Stratmann, 
 O. Yazyev, A. J. Austin, R. Cammi, C. Pomelli, J. W. Ochterski, 
 P. Y. Ayala, K. Morokuma, G. A. Voth, P. Salvador, J. J. Dannenberg, 
 V. G. Zakrzewski, S. Dapprich, A. D. Daniels, M. C. Strain, 
 O. Farkas, D. K. Malick, A. D. Rabuck, K. Raghavachari, 
 J. B. Foresman, J. V. Ortiz, Q. Cui, A. G. Baboul, S. Clifford, 
 J. Cioslowski, B. B. Stefanov, G. Liu, A. Liashenko, P. Piskorz, 
 I. Komaromi, R. L. Martin, D. J. Fox, T. Keith, M. A. Al-Laham, 
 C. Y. Peng, A. Nanayakkara, M. Challacombe, P. M. W. Gill, 
 B. Johnson, W. Chen, M. W. Wong, C. Gonzalez, and J. A. Pople, 
 Gaussian, Inc., Wallingford CT, 2004.
 
 ******************************************
 Gaussian 03:  AM64L-G03RevE.01 11-Sep-2007
                16-Apr-2014 
 ******************************************
 %chk=CO2_geopt_B3LYP_tzvp.chk
 %mem=6MW
 %nprocshared=1
 Will use up to    1 processors via shared memory.
 Default route: MaxDisk=200000000
 ----------------------------------------
 # opt=tight b3lyp tzvp geom=connectivity
 ----------------------------------------
 1/7=10,14=-1,18=20,26=3,38=1,57=2/1,3;
 2/9=110,17=6,18=5,40=1/2;
 3/5=19,7=101,11=2,16=1,25=1,30=1,74=-5/1,2,3;
 4//1;
 5/5=2,38=5/2;
 6/7=2,8=2,9=2,10=2,28=1/1;
 7//1,2,3,16;
 1/14=-1,18=20/3(3);
 2/9=110/2;
 6/7=2,8=2,9=2,10=2,19=2,28=1/1;
 99//99;
 2/9=110/2;
 3/5=19,7=101,11=2,16=1,25=1,30=1,74=-5/1,2,3;
 4/5=5,16=3/1;
 5/5=2,38=5/2;
 7//1,2,3,16;
 1/14=-1,18=20/3(-5);
 2/9=110/2;
 6/7=2,8=2,9=2,10=2,19=2,28=1/1;
 99/9=1/99;
 -------------------
 Title Card Required
 -------------------
 Symbolic Z-matrix:
 Charge =  0 Multiplicity = 1
 C                     0.        0.        0. 
 O                     0.        0.        1.18022 
 O                     0.        0.       -1.18022 
 

 GradGradGradGradGradGradGradGradGradGradGradGradGradGradGradGradGradGrad
 Berny optimization.
 Initialization pass.
                           ----------------------------
                           !    Initial Parameters    !
                           ! (Angstroms and Degrees)  !
 --------------------------                            --------------------------
 ! Name  Definition              Value          Derivative Info.                !
 --------------------------------------------------------------------------------
 ! R1    R(1,2)                  1.1802         estimate D2E/DX2                !
 ! R2    R(1,3)                  1.1802         estimate D2E/DX2                !
 ! A1    L(2,1,3,-1,-1)        180.0            estimate D2E/DX2                !
 ! A2    L(2,1,3,-2,-2)        180.0            estimate D2E/DX2                !
 --------------------------------------------------------------------------------
 Trust Radius=3.00D-01 FncErr=1.00D-07 GrdErr=1.00D-06
 Number of steps in this run=  20 maximum allowed number of steps= 100.
 GradGradGradGradGradGradGradGradGradGradGradGradGradGradGradGradGradGrad

                          Input orientation:                          
 ---------------------------------------------------------------------
 Center     Atomic     Atomic              Coordinates (Angstroms)
 Number     Number      Type              X           Y           Z
 ---------------------------------------------------------------------
    1          6             0        0.000000    0.000000    0.000000
    2          8             0        0.000000    0.000000    1.180223
    3          8             0        0.000000    0.000000   -1.180223
 ---------------------------------------------------------------------
                    Distance matrix (angstroms):
                    1          2          3
     1  C    0.000000
     2  O    1.180223   0.000000
     3  O    1.180223   2.360446   0.000000
 Stoichiometry    CO2
 Framework group  D*H[O(C),C*(O.O)]
 Deg. of freedom     1
 Full point group                 D*H
 Largest Abelian subgroup         D2H     NOp   8
 Largest concise Abelian subgroup C2      NOp   2
                         Standard orientation:                         
 ---------------------------------------------------------------------
 Center     Atomic     Atomic              Coordinates (Angstroms)
 Number     Number      Type              X           Y           Z
 ---------------------------------------------------------------------
    1          6             0        0.000000    0.000000    0.000000
    2          8             0        0.000000    0.000000    1.180223
    3          8             0        0.000000    0.000000   -1.180223
 ---------------------------------------------------------------------
 Rotational constants (GHZ):      0.0000000     11.3416731     11.3416731
 Standard basis: TZVP (5D, 7F)
 There are    17 symmetry adapted basis functions of AG  symmetry.
 There are     2 symmetry adapted basis functions of B1G symmetry.
 There are     5 symmetry adapted basis functions of B2G symmetry.
 There are     5 symmetry adapted basis functions of B3G symmetry.
 There are     1 symmetry adapted basis functions of AU  symmetry.
 There are    13 symmetry adapted basis functions of B1U symmetry.
 There are     7 symmetry adapted basis functions of B2U symmetry.
 There are     7 symmetry adapted basis functions of B3U symmetry.
 Integral buffers will be    131072 words long.
 Raffenetti 2 integral format.
 Two-electron integral symmetry is turned on.
    57 basis functions,   105 primitive gaussians,    60 cartesian basis functions
    11 alpha electrons       11 beta electrons
       nuclear repulsion energy        57.3914274357 Hartrees.
 NAtoms=    3 NActive=    3 NUniq=    2 SFac= 1.69D+00 NAtFMM=   80 NAOKFM=F Big=F
 One-electron integrals computed using PRISM.
 NBasis=    57 RedAO= T  NBF=    17     2     5     5     1    13     7     7
 NBsUse=    57 1.00D-06 NBFU=    17     2     5     5     1    13     7     7
 Harris functional with IExCor=  402 diagonalized for initial guess.
 ExpMin= 9.52D-02 ExpMax= 2.70D+04 ExpMxC= 9.22D+02 IAcc=2 IRadAn=         4 AccDes= 0.00D+00
 HarFok:  IExCor= 402 AccDes= 0.00D+00 IRadAn=         4 IDoV=1
 ScaDFX=  1.000000  1.000000  1.000000  1.000000
 Initial guess orbital symmetries:
       Occupied  (SGU) (SGG) (SGG) (SGG) (SGU) (SGG) (SGU) (PIU)
                 (PIU) (PIG) (PIG)
       Virtual   (PIU) (PIU) (SGG) (SGU) (PIU) (PIU) (SGG) (SGG)
                 (SGU) (PIG) (PIG) (PIU) (PIU) (SGG) (SGU) (SGU)
                 (SGG) (PIU) (PIU) (PIG) (PIG) (DLTG) (DLTG) (SGU)
                 (SGG) (PIG) (PIG) (DLTU) (DLTU) (PIU) (PIU) (DLTG)
                 (DLTG) (SGU) (PIU) (PIU) (SGG) (SGU) (SGG) (PIG)
                 (PIG) (SGU) (SGG) (SGG) (SGG) (SGU)
 The electronic state of the initial guess is 1-SGG.
 Requested convergence on RMS density matrix=1.00D-08 within 128 cycles.
 Requested convergence on MAX density matrix=1.00D-06.
 Requested convergence on             energy=1.00D-06.
 No special actions if energy rises.
 Keep R1 integrals in memory in canonical form, NReq=     3430888.
 Integral accuracy reduced to 1.0D-05 until final iterations.
 Initial convergence to 1.0D-05 achieved.  Increase integral accuracy.
 SCF Done:  E(RB+HF-LYP) =  -188.656879632     A.U. after   10 cycles
             Convg  =    0.2607D-08             -V/T =  2.0048
             S**2   =   0.0000

 **********************************************************************

            Population analysis using the SCF density.

 **********************************************************************

 Orbital symmetries:
       Occupied  (SGU) (SGG) (SGG) (SGG) (SGU) (SGG) (SGU) (PIU)
                 (PIU) (PIG) (PIG)
       Virtual   (SGG) (PIU) (PIU) (SGU) (PIU) (PIU) (SGG) (SGG)
                 (SGU) (PIG) (PIG) (PIU) (PIU) (SGG) (SGU) (SGU)
                 (SGG) (PIU) (PIU) (DLTG) (DLTG) (PIG) (PIG) (SGU)
                 (SGG) (PIG) (PIG) (DLTU) (DLTU) (PIU) (PIU) (DLTG)
                 (DLTG) (SGU) (PIU) (PIU) (SGG) (SGU) (SGG) (PIG)
                 (PIG) (SGU) (SGG) (SGG) (SGG) (SGU)
 The electronic state is 1-SGG.
 Alpha  occ. eigenvalues --  -19.22156 -19.22154 -10.37747  -1.16751  -1.12763
 Alpha  occ. eigenvalues --   -0.57688  -0.53066  -0.52304  -0.52304  -0.38380
 Alpha  occ. eigenvalues --   -0.38380
 Alpha virt. eigenvalues --    0.00554   0.00575   0.00575   0.16496   0.18127
 Alpha virt. eigenvalues --    0.18127   0.27331   0.36721   0.42650   0.44836
 Alpha virt. eigenvalues --    0.44836   0.58089   0.58089   0.73282   0.80880
 Alpha virt. eigenvalues --    0.88338   1.26170   1.31644   1.31644   1.52221
 Alpha virt. eigenvalues --    1.52222   1.54541   1.54541   1.66584   2.19792
 Alpha virt. eigenvalues --    2.51100   2.51100   2.53898   2.53898   2.63570
 Alpha virt. eigenvalues --    2.63570   2.64752   2.64752   2.70217   2.77040
 Alpha virt. eigenvalues --    2.77040   2.82470   3.07874   3.12674   3.61607
 Alpha virt. eigenvalues --    3.61607   4.31468   4.42758  22.52680  43.17931
 Alpha virt. eigenvalues --   43.47643
          Condensed to atoms (all electrons):
              1          2          3
     1  C    4.375078   0.540880   0.540880
     2  O    0.540880   7.796810  -0.066109
     3  O    0.540880  -0.066109   7.796810
 Mulliken atomic charges:
              1
     1  C    0.543162
     2  O   -0.271581
     3  O   -0.271581
 Sum of Mulliken charges=   0.00000
 Atomic charges with hydrogens summed into heavy atoms:
              1
     1  C    0.543162
     2  O   -0.271581
     3  O   -0.271581
 Sum of Mulliken charges=   0.00000
 Electronic spatial extent (au):  <R**2>=   116.4941
 Charge=     0.0000 electrons
 Dipole moment (field-independent basis, Debye):
    X=     0.0000    Y=     0.0000    Z=     0.0000  Tot=     0.0000
 Quadrupole moment (field-independent basis, Debye-Ang):
   XX=   -14.8917   YY=   -14.8917   ZZ=   -19.8570
   XY=     0.0000   XZ=     0.0000   YZ=     0.0000
 Traceless Quadrupole moment (field-independent basis, Debye-Ang):
   XX=     1.6551   YY=     1.6551   ZZ=    -3.3102
   XY=     0.0000   XZ=     0.0000   YZ=     0.0000
 Octapole moment (field-independent basis, Debye-Ang**2):
  XXX=     0.0000  YYY=     0.0000  ZZZ=     0.0000  XYY=     0.0000
  XXY=     0.0000  XXZ=     0.0000  XZZ=     0.0000  YZZ=     0.0000
  YYZ=     0.0000  XYZ=     0.0000
 Hexadecapole moment (field-independent basis, Debye-Ang**3):
 XXXX=   -11.9507 YYYY=   -11.9507 ZZZZ=  -108.1657 XXXY=     0.0000
 XXXZ=     0.0000 YYYX=     0.0000 YYYZ=     0.0000 ZZZX=     0.0000
 ZZZY=     0.0000 XXYY=    -3.9836 XXZZ=   -19.6064 YYZZ=   -19.6064
 XXYZ=     0.0000 YYXZ=     0.0000 ZZXY=     0.0000
 N-N= 5.739142743566D+01 E-N=-5.586933416882D+02  KE= 1.877635075934D+02
 Symmetry AG   KE= 1.012315437834D+02
 Symmetry B1G  KE= 8.982459217982D-34
 Symmetry B2G  KE= 4.938906002981D+00
 Symmetry B3G  KE= 4.938906002981D+00
 Symmetry AU   KE= 1.354260566111D-34
 Symmetry B1U  KE= 6.933069150197D+01
 Symmetry B2U  KE= 3.661730151048D+00
 Symmetry B3U  KE= 3.661730151048D+00
 ***** Axes restored to original set *****
 -------------------------------------------------------------------
 Center     Atomic                   Forces (Hartrees/Bohr)
 Number     Number              X              Y              Z
 -------------------------------------------------------------------
    1          6           0.000000000    0.000000000    0.000000000
    2          8           0.000000000    0.000000000   -0.039952921
    3          8           0.000000000    0.000000000    0.039952921
 -------------------------------------------------------------------
 Cartesian Forces:  Max     0.039952921 RMS     0.018833988

 GradGradGradGradGradGradGradGradGradGradGradGradGradGradGradGradGradGrad
 Berny optimization.
 Internal  Forces:  Max     0.039952921 RMS     0.028250981
 Search for a local minimum.
 Step number   1 out of a maximum of  20
 All quantities printed in internal units (Hartrees-Bohrs-Radians)
 Second derivative matrix not updated -- first step.
 The second derivative matrix:
                          R1        R2        A1        A2
           R1           1.15423
           R2           0.00000   1.15423
           A1           0.00000   0.00000   0.25000
           A2           0.00000   0.00000   0.00000   0.25000
     Eigenvalues ---    0.25000   0.25000   1.15423   1.15423
 RFO step:  Lambda=-2.75928647D-03.
 Linear search not attempted -- first point.
 Iteration  1 RMS(Cart)=  0.02441762 RMS(Int)=  0.00000000
 Iteration  2 RMS(Cart)=  0.00000000 RMS(Int)=  0.00000000
 Variable       Old X    -DE/DX   Delta X   Delta X   Delta X     New X
                                 (Linear)    (Quad)   (Total)
    R1        2.23030  -0.03995   0.00000  -0.03453  -0.03453   2.19577
    R2        2.23030  -0.03995   0.00000  -0.03453  -0.03453   2.19577
    A1        3.14159   0.00000   0.00000   0.00000   0.00000   3.14159
    A2        3.14159   0.00000   0.00000   0.00000   0.00000   3.14159
         Item               Value     Threshold  Converged?
 Maximum Force            0.039953     0.000015     NO 
 RMS     Force            0.028251     0.000010     NO 
 Maximum Displacement     0.034532     0.000060     NO 
 RMS     Displacement     0.024418     0.000040     NO 
 Predicted change in Energy=-1.382934D-03
 GradGradGradGradGradGradGradGradGradGradGradGradGradGradGradGradGradGrad

                          Input orientation:                          
 ---------------------------------------------------------------------
 Center     Atomic     Atomic              Coordinates (Angstroms)
 Number     Number      Type              X           Y           Z
 ---------------------------------------------------------------------
    1          6             0        0.000000    0.000000    0.000000
    2          8             0        0.000000    0.000000    1.161950
    3          8             0        0.000000    0.000000   -1.161950
 ---------------------------------------------------------------------
                    Distance matrix (angstroms):
                    1          2          3
     1  C    0.000000
     2  O    1.161950   0.000000
     3  O    1.161950   2.323899   0.000000
 Stoichiometry    CO2
 Framework group  D*H[O(C),C*(O.O)]
 Deg. of freedom     1
 Full point group                 D*H
 Largest Abelian subgroup         D2H     NOp   8
 Largest concise Abelian subgroup C2      NOp   2
                         Standard orientation:                         
 ---------------------------------------------------------------------
 Center     Atomic     Atomic              Coordinates (Angstroms)
 Number     Number      Type              X           Y           Z
 ---------------------------------------------------------------------
    1          6             0        0.000000    0.000000    0.000000
    2          8             0        0.000000    0.000000    1.161950
    3          8             0        0.000000    0.000000   -1.161950
 ---------------------------------------------------------------------
 Rotational constants (GHZ):      0.0000000     11.7012078     11.7012078
 Standard basis: TZVP (5D, 7F)
 There are    17 symmetry adapted basis functions of AG  symmetry.
 There are     2 symmetry adapted basis functions of B1G symmetry.
 There are     5 symmetry adapted basis functions of B2G symmetry.
 There are     5 symmetry adapted basis functions of B3G symmetry.
 There are     1 symmetry adapted basis functions of AU  symmetry.
 There are    13 symmetry adapted basis functions of B1U symmetry.
 There are     7 symmetry adapted basis functions of B2U symmetry.
 There are     7 symmetry adapted basis functions of B3U symmetry.
 Integral buffers will be    131072 words long.
 Raffenetti 2 integral format.
 Two-electron integral symmetry is turned on.
    57 basis functions,   105 primitive gaussians,    60 cartesian basis functions
    11 alpha electrons       11 beta electrons
       nuclear repulsion energy        58.2939937506 Hartrees.
 NAtoms=    3 NActive=    3 NUniq=    2 SFac= 1.69D+00 NAtFMM=   80 NAOKFM=F Big=F
 One-electron integrals computed using PRISM.
 NBasis=    57 RedAO= T  NBF=    17     2     5     5     1    13     7     7
 NBsUse=    57 1.00D-06 NBFU=    17     2     5     5     1    13     7     7
 Initial guess read from the read-write file:
 Initial guess orbital symmetries:
       Occupied  (SGU) (SGG) (SGG) (SGG) (SGU) (SGG) (SGU) (PIU)
                 (PIU) (PIG) (PIG)
       Virtual   (SGG) (PIU) (PIU) (SGU) (PIU) (PIU) (SGG) (SGG)
                 (SGU) (PIG) (PIG) (PIU) (PIU) (SGG) (SGU) (SGU)
                 (SGG) (PIU) (PIU) (DLTG) (DLTG) (PIG) (PIG) (SGU)
                 (SGG) (PIG) (PIG) (DLTU) (DLTU) (PIU) (PIU) (DLTG)
                 (DLTG) (SGU) (PIU) (PIU) (SGG) (SGU) (SGG) (PIG)
                 (PIG) (SGU) (SGG) (SGG) (SGG) (SGU)
 Harris functional with IExCor=  402 diagonalized for initial guess.
 ExpMin= 9.52D-02 ExpMax= 2.70D+04 ExpMxC= 9.22D+02 IAcc=2 IRadAn=         4 AccDes= 0.00D+00
 HarFok:  IExCor= 402 AccDes= 0.00D+00 IRadAn=         4 IDoV=1
 ScaDFX=  1.000000  1.000000  1.000000  1.000000
 Requested convergence on RMS density matrix=1.00D-08 within 128 cycles.
 Requested convergence on MAX density matrix=1.00D-06.
 Requested convergence on             energy=1.00D-06.
 No special actions if energy rises.
 Keep R1 integrals in memory in canonical form, NReq=     3430888.
 Integral accuracy reduced to 1.0D-05 until final iterations.
 Initial convergence to 1.0D-05 achieved.  Increase integral accuracy.
 SCF Done:  E(RB+HF-LYP) =  -188.658395421     A.U. after   10 cycles
             Convg  =    0.3096D-08             -V/T =  2.0039
             S**2   =   0.0000
 ***** Axes restored to original set *****
 -------------------------------------------------------------------
 Center     Atomic                   Forces (Hartrees/Bohr)
 Number     Number              X              Y              Z
 -------------------------------------------------------------------
    1          6           0.000000000    0.000000000    0.000000000
    2          8           0.000000000    0.000000000   -0.003141351
    3          8           0.000000000    0.000000000    0.003141351
 -------------------------------------------------------------------
 Cartesian Forces:  Max     0.003141351 RMS     0.001480847

 GradGradGradGradGradGradGradGradGradGradGradGradGradGradGradGradGradGrad
 Berny optimization.
 Internal  Forces:  Max     0.003141351 RMS     0.002221271
 Search for a local minimum.
 Step number   2 out of a maximum of  20
 All quantities printed in internal units (Hartrees-Bohrs-Radians)
 Update second derivatives using D2CorX and points  1  2
 Trust test= 1.10D+00 RLast= 4.88D-02 DXMaxT set to 3.00D-01
 The second derivative matrix:
                          R1        R2        A1        A2
           R1           1.11013
           R2          -0.04411   1.11013
           A1           0.00000   0.00000   0.25000
           A2           0.00000   0.00000   0.00000   0.25000
     Eigenvalues ---    0.25000   0.25000   1.06602   1.15423
 RFO step:  Lambda= 0.00000000D+00.
 Quartic linear search produced a step of  0.07965.
 Iteration  1 RMS(Cart)=  0.00194485 RMS(Int)=  0.00000000
 Iteration  2 RMS(Cart)=  0.00000000 RMS(Int)=  0.00000000
 Variable       Old X    -DE/DX   Delta X   Delta X   Delta X     New X
                                 (Linear)    (Quad)   (Total)
    R1        2.19577  -0.00314  -0.00275   0.00000  -0.00275   2.19302
    R2        2.19577  -0.00314  -0.00275   0.00000  -0.00275   2.19302
    A1        3.14159   0.00000   0.00000   0.00000   0.00000   3.14159
    A2        3.14159   0.00000   0.00000   0.00000   0.00000   3.14159
         Item               Value     Threshold  Converged?
 Maximum Force            0.003141     0.000015     NO 
 RMS     Force            0.002221     0.000010     NO 
 Maximum Displacement     0.002750     0.000060     NO 
 RMS     Displacement     0.001945     0.000040     NO 
 Predicted change in Energy=-9.215825D-06
 GradGradGradGradGradGradGradGradGradGradGradGradGradGradGradGradGradGrad

                          Input orientation:                          
 ---------------------------------------------------------------------
 Center     Atomic     Atomic              Coordinates (Angstroms)
 Number     Number      Type              X           Y           Z
 ---------------------------------------------------------------------
    1          6             0        0.000000    0.000000    0.000000
    2          8             0        0.000000    0.000000    1.160494
    3          8             0        0.000000    0.000000   -1.160494
 ---------------------------------------------------------------------
                    Distance matrix (angstroms):
                    1          2          3
     1  C    0.000000
     2  O    1.160494   0.000000
     3  O    1.160494   2.320988   0.000000
 Stoichiometry    CO2
 Framework group  D*H[O(C),C*(O.O)]
 Deg. of freedom     1
 Full point group                 D*H
 Largest Abelian subgroup         D2H     NOp   8
 Largest concise Abelian subgroup C2      NOp   2
                         Standard orientation:                         
 ---------------------------------------------------------------------
 Center     Atomic     Atomic              Coordinates (Angstroms)
 Number     Number      Type              X           Y           Z
 ---------------------------------------------------------------------
    1          6             0        0.000000    0.000000    0.000000
    2          8             0        0.000000    0.000000    1.160494
    3          8             0        0.000000    0.000000   -1.160494
 ---------------------------------------------------------------------
 Rotational constants (GHZ):      0.0000000     11.7305771     11.7305771
 Standard basis: TZVP (5D, 7F)
 There are    17 symmetry adapted basis functions of AG  symmetry.
 There are     2 symmetry adapted basis functions of B1G symmetry.
 There are     5 symmetry adapted basis functions of B2G symmetry.
 There are     5 symmetry adapted basis functions of B3G symmetry.
 There are     1 symmetry adapted basis functions of AU  symmetry.
 There are    13 symmetry adapted basis functions of B1U symmetry.
 There are     7 symmetry adapted basis functions of B2U symmetry.
 There are     7 symmetry adapted basis functions of B3U symmetry.
 Integral buffers will be    131072 words long.
 Raffenetti 2 integral format.
 Two-electron integral symmetry is turned on.
    57 basis functions,   105 primitive gaussians,    60 cartesian basis functions
    11 alpha electrons       11 beta electrons
       nuclear repulsion energy        58.3671049591 Hartrees.
 NAtoms=    3 NActive=    3 NUniq=    2 SFac= 1.69D+00 NAtFMM=   80 NAOKFM=F Big=F
 One-electron integrals computed using PRISM.
 NBasis=    57 RedAO= T  NBF=    17     2     5     5     1    13     7     7
 NBsUse=    57 1.00D-06 NBFU=    17     2     5     5     1    13     7     7
 Initial guess read from the read-write file:
 Initial guess orbital symmetries:
       Occupied  (SGU) (SGG) (SGG) (SGG) (SGU) (SGG) (SGU) (PIU)
                 (PIU) (PIG) (PIG)
       Virtual   (SGG) (PIU) (PIU) (SGU) (PIU) (PIU) (SGG) (SGG)
                 (SGU) (PIG) (PIG) (PIU) (PIU) (SGG) (SGU) (SGU)
                 (SGG) (PIU) (PIU) (DLTG) (DLTG) (PIG) (PIG) (SGU)
                 (SGG) (PIG) (PIG) (DLTU) (DLTU) (PIU) (PIU) (DLTG)
                 (DLTG) (SGU) (PIU) (PIU) (SGG) (SGU) (SGG) (PIG)
                 (PIG) (SGU) (SGG) (SGG) (SGG) (SGU)
 Requested convergence on RMS density matrix=1.00D-08 within 128 cycles.
 Requested convergence on MAX density matrix=1.00D-06.
 Requested convergence on             energy=1.00D-06.
 No special actions if energy rises.
 Keep R1 integrals in memory in canonical form, NReq=     3430888.
 SCF Done:  E(RB+HF-LYP) =  -188.658404072     A.U. after    6 cycles
             Convg  =    0.6025D-08             -V/T =  2.0038
             S**2   =   0.0000
 ***** Axes restored to original set *****
 -------------------------------------------------------------------
 Center     Atomic                   Forces (Hartrees/Bohr)
 Number     Number              X              Y              Z
 -------------------------------------------------------------------
    1          6           0.000000000    0.000000000    0.000000000
    2          8           0.000000000    0.000000000    0.000001467
    3          8           0.000000000    0.000000000   -0.000001467
 -------------------------------------------------------------------
 Cartesian Forces:  Max     0.000001467 RMS     0.000000692

 GradGradGradGradGradGradGradGradGradGradGradGradGradGradGradGradGradGrad
 Berny optimization.
 Internal  Forces:  Max     0.000001467 RMS     0.000001037
 Search for a local minimum.
 Step number   3 out of a maximum of  20
 All quantities printed in internal units (Hartrees-Bohrs-Radians)
 Update second derivatives using D2CorX and points  1  2  3
 Trust test= 9.39D-01 RLast= 3.89D-03 DXMaxT set to 3.00D-01
 The second derivative matrix:
                          R1        R2        A1        A2
           R1           1.14845
           R2          -0.00579   1.14845
           A1           0.00000   0.00000   0.25000
           A2           0.00000   0.00000   0.00000   0.25000
     Eigenvalues ---    0.25000   0.25000   1.14266   1.15423
 RFO step:  Lambda= 0.00000000D+00.
 Quartic linear search produced a step of -0.00046.
 Iteration  1 RMS(Cart)=  0.00000090 RMS(Int)=  0.00000000
 Variable       Old X    -DE/DX   Delta X   Delta X   Delta X     New X
                                 (Linear)    (Quad)   (Total)
    R1        2.19302   0.00000   0.00000   0.00000   0.00000   2.19302
    R2        2.19302   0.00000   0.00000   0.00000   0.00000   2.19302
    A1        3.14159   0.00000   0.00000   0.00000   0.00000   3.14159
    A2        3.14159   0.00000   0.00000   0.00000   0.00000   3.14159
         Item               Value     Threshold  Converged?
 Maximum Force            0.000001     0.000015     YES
 RMS     Force            0.000001     0.000010     YES
 Maximum Displacement     0.000001     0.000060     YES
 RMS     Displacement     0.000001     0.000040     YES
 Predicted change in Energy=-1.883473D-12
 Optimization completed.
    -- Stationary point found.
                           ----------------------------
                           !   Optimized Parameters   !
                           ! (Angstroms and Degrees)  !
 --------------------------                            --------------------------
 ! Name  Definition              Value          Derivative Info.                !
 --------------------------------------------------------------------------------
 ! R1    R(1,2)                  1.1605         -DE/DX =    0.0                 !
 ! R2    R(1,3)                  1.1605         -DE/DX =    0.0                 !
 ! A1    L(2,1,3,-1,-1)        180.0            -DE/DX =    0.0                 !
 ! A2    L(2,1,3,-2,-2)        180.0            -DE/DX =    0.0                 !
 --------------------------------------------------------------------------------
 GradGradGradGradGradGradGradGradGradGradGradGradGradGradGradGradGradGrad

                          Input orientation:                          
 ---------------------------------------------------------------------
 Center     Atomic     Atomic              Coordinates (Angstroms)
 Number     Number      Type              X           Y           Z
 ---------------------------------------------------------------------
    1          6             0        0.000000    0.000000    0.000000
    2          8             0        0.000000    0.000000    1.160494
    3          8             0        0.000000    0.000000   -1.160494
 ---------------------------------------------------------------------
                    Distance matrix (angstroms):
                    1          2          3
     1  C    0.000000
     2  O    1.160494   0.000000
     3  O    1.160494   2.320988   0.000000
 Stoichiometry    CO2
 Framework group  D*H[O(C),C*(O.O)]
 Deg. of freedom     1
 Full point group                 D*H
 Largest Abelian subgroup         D2H     NOp   8
 Largest concise Abelian subgroup C2      NOp   2
                         Standard orientation:                         
 ---------------------------------------------------------------------
 Center     Atomic     Atomic              Coordinates (Angstroms)
 Number     Number      Type              X           Y           Z
 ---------------------------------------------------------------------
    1          6             0        0.000000    0.000000    0.000000
    2          8             0        0.000000    0.000000    1.160494
    3          8             0        0.000000    0.000000   -1.160494
 ---------------------------------------------------------------------
 Rotational constants (GHZ):      0.0000000     11.7305771     11.7305771

 **********************************************************************

            Population analysis using the SCF density.

 **********************************************************************

 Orbital symmetries:
       Occupied  (SGU) (SGG) (SGG) (SGG) (SGU) (SGG) (SGU) (PIU)
                 (PIU) (PIG) (PIG)
       Virtual   (SGG) (PIU) (PIU) (SGU) (PIU) (PIU) (SGG) (SGG)
                 (SGU) (PIG) (PIG) (PIU) (PIU) (SGG) (SGU) (SGU)
                 (SGG) (PIU) (PIU) (DLTG) (DLTG) (PIG) (PIG) (SGU)
                 (SGG) (PIG) (PIG) (DLTU) (DLTU) (PIU) (PIU) (DLTG)
                 (DLTG) (SGU) (PIU) (PIU) (SGG) (SGU) (SGG) (PIG)
                 (PIG) (SGU) (SGG) (SGG) (SGG) (SGU)
 The electronic state is 1-SGG.
 Alpha  occ. eigenvalues --  -19.21695 -19.21692 -10.36949  -1.17622  -1.13653
 Alpha  occ. eigenvalues --   -0.57316  -0.53122  -0.52971  -0.52971  -0.38433
 Alpha  occ. eigenvalues --   -0.38433
 Alpha virt. eigenvalues --    0.01039   0.01928   0.01928   0.16517   0.18010
 Alpha virt. eigenvalues --    0.18010   0.29340   0.36572   0.42939   0.44932
 Alpha virt. eigenvalues --    0.44932   0.58437   0.58437   0.73538   0.81023
 Alpha virt. eigenvalues --    0.93975   1.27483   1.31747   1.31747   1.51826
 Alpha virt. eigenvalues --    1.51827   1.56377   1.56377   1.64973   2.17729
 Alpha virt. eigenvalues --    2.51055   2.51055   2.53750   2.53750   2.64044
 Alpha virt. eigenvalues --    2.64044   2.65886   2.65887   2.72581   2.79201
 Alpha virt. eigenvalues --    2.79201   2.83813   3.08225   3.20223   3.67920
 Alpha virt. eigenvalues --    3.67920   4.41371   4.43892  22.66806  43.20641
 Alpha virt. eigenvalues --   43.49202
          Condensed to atoms (all electrons):
              1          2          3
     1  C    4.344385   0.554753   0.554753
     2  O    0.554753   7.792339  -0.074038
     3  O    0.554753  -0.074038   7.792339
 Mulliken atomic charges:
              1
     1  C    0.546109
     2  O   -0.273055
     3  O   -0.273055
 Sum of Mulliken charges=   0.00000
 Atomic charges with hydrogens summed into heavy atoms:
              1
     1  C    0.546109
     2  O   -0.273055
     3  O   -0.273055
 Sum of Mulliken charges=   0.00000
 Electronic spatial extent (au):  <R**2>=   113.6508
 Charge=     0.0000 electrons
 Dipole moment (field-independent basis, Debye):
    X=     0.0000    Y=     0.0000    Z=     0.0000  Tot=     0.0000
 Quadrupole moment (field-independent basis, Debye-Ang):
   XX=   -14.7899   YY=   -14.7899   ZZ=   -19.7852
   XY=     0.0000   XZ=     0.0000   YZ=     0.0000
 Traceless Quadrupole moment (field-independent basis, Debye-Ang):
   XX=     1.6651   YY=     1.6651   ZZ=    -3.3302
   XY=     0.0000   XZ=     0.0000   YZ=     0.0000
 Octapole moment (field-independent basis, Debye-Ang**2):
  XXX=     0.0000  YYY=     0.0000  ZZZ=     0.0000  XYY=     0.0000
  XXY=     0.0000  XXZ=     0.0000  XZZ=     0.0000  YZZ=     0.0000
  YYZ=     0.0000  XYZ=     0.0000
 Hexadecapole moment (field-independent basis, Debye-Ang**3):
 XXXX=   -11.7830 YYYY=   -11.7830 ZZZZ=  -105.1796 XXXY=     0.0000
 XXXZ=     0.0000 YYYX=     0.0000 YYYZ=     0.0000 ZZZX=     0.0000
 ZZZY=     0.0000 XXYY=    -3.9277 XXZZ=   -19.0371 YYZZ=   -19.0371
 XXYZ=     0.0000 YYXZ=     0.0000 ZZXY=     0.0000
 N-N= 5.836710495907D+01 E-N=-5.607745096889D+02  KE= 1.879350605671D+02
 Symmetry AG   KE= 1.012977577756D+02
 Symmetry B1G  KE= 9.766268709572D-34
 Symmetry B2G  KE= 4.950148408969D+00
 Symmetry B3G  KE= 4.950148408969D+00
 Symmetry AU   KE= 1.463116343045D-34
 Symmetry B1U  KE= 6.939588293895D+01
 Symmetry B2U  KE= 3.670561517313D+00
 Symmetry B3U  KE= 3.670561517313D+00
 1\1\RECHENZENTRUM RWTH AACHEN-PC-JENS\FOpt\RB3LYP\TZVP\C1O2\JENS\16-Ap
 r-2014\0\\# opt=tight b3lyp tzvp geom=connectivity\\Title Card Require
 d\\0,1\C,0.,0.,0.\O,0.,0.,1.1604941295\O,0.,0.,-1.1604941295\\Version=
 AM64L-G03RevE.01\State=1-SGG\HF=-188.6584041\RMSD=6.025e-09\RMSF=6.916
 e-07\Thermal=0.\Dipole=0.,0.,0.\PG=D*H [O(C1),C*(O1.O1)]\\@


 WHEN IT COMES TO CASH FLOW, IT SEEMS LIKE THE TIDE IS ALWAYS GOING OUT.
 Job cpu time:  0 days  0 hours  0 minutes  3.4 seconds.
 File lengths (MBytes):  RWF=     13 Int=      0 D2E=      0 Chk=      6 Scr=      1
 Normal termination of Gaussian 03 at Wed Apr 16 15:09:33 2014.
