# Supplementary material for: CO from CO2and fluctuating renewable energy via formic-acid derivatives
Source: Royal Society of Chemistry journal article supplement (doi:10.1039/c6gc01202g), 2016-01-01
Supplement: c6gc01202g2.log [file c6gc01202g2.log]

 Entering Gaussian System, Link 0=/opt/mbfd/GAUSSIAN/LINUX64/g03.e01/g03
 Input=CO_Geoopt_B3LYP_TZVP.com
 Output=CO_Geoopt_B3LYP_TZVP.log
 Initial command:
 /opt/mbfd/GAUSSIAN/LINUX64/g03.e01/l1.exe /gaussianscratch/Gau-6648.inp -scrdir=/gaussianscratch/
 Entering Link 1 = /opt/mbfd/GAUSSIAN/LINUX64/g03.e01/l1.exe PID=      6652.
  
 Copyright (c) 1988,1990,1992,1993,1995,1998,2003,2004,2007, Gaussian, Inc.
                  All Rights Reserved.
  
 This is the Gaussian(R) 03 program.  It is based on the
 the Gaussian(R) 98 system (copyright 1998, Gaussian, Inc.),
 the Gaussian(R) 94 system (copyright 1995, Gaussian, Inc.),
 the Gaussian 92(TM) system (copyright 1992, Gaussian, Inc.),
 the Gaussian 90(TM) system (copyright 1990, Gaussian, Inc.),
 the Gaussian 88(TM) system (copyright 1988, Gaussian, Inc.),
 the Gaussian 86(TM) system (copyright 1986, Carnegie Mellon
 University), and the Gaussian 82(TM) system (copyright 1983,
 Carnegie Mellon University). Gaussian is a federally registered
 trademark of Gaussian, Inc.
  
 This software contains proprietary and confidential information,
 including trade secrets, belonging to Gaussian, Inc.
  
 This software is provided under written license and may be
 used, copied, transmitted, or stored only in accord with that
 written license.
  
 The following legend is applicable only to US Government
 contracts under FAR:
  
                    RESTRICTED RIGHTS LEGEND
  
 Use, reproduction and disclosure by the US Government is
 subject to restrictions as set forth in subparagraphs (a)
 and (c) of the Commercial Computer Software - Restricted
 Rights clause in FAR 52.227-19.
  
 Gaussian, Inc.
 340 Quinnipiac St., Bldg. 40, Wallingford CT 06492
  
  
 ---------------------------------------------------------------
 Warning -- This program may not be used in any manner that
 competes with the business of Gaussian, Inc. or will provide
 assistance to any competitor of Gaussian, Inc.  The licensee
 of this program is prohibited from giving any competitor of
 Gaussian, Inc. access to this program.  By using this program,
 the user acknowledges that Gaussian, Inc. is engaged in the
 business of creating and licensing software in the field of
 computational chemistry and represents and warrants to the
 licensee that it is not a competitor of Gaussian, Inc. and that
 it will not use this program in any manner prohibited above.
 ---------------------------------------------------------------
  

 Cite this work as:
 Gaussian 03, Revision E.01,
 M. J. Frisch, G. W. Trucks, H. B. Schlegel, G. E. Scuseria, 
 M. A. Robb, J. R. Cheeseman, J. A. Montgomery, Jr., T. Vreven, 
 K. N. Kudin, J. C. Burant, J. M. Millam, S. S. Iyengar, J. Tomasi, 
 V. Barone, B. Mennucci, M. Cossi, G. Scalmani, N. Rega, 
 G. A. Petersson, H. Nakatsuji, M. Hada, M. Ehara, K. Toyota, 
 R. Fukuda, J. Hasegawa, M. Ishida, T. Nakajima, Y. Honda, O. Kitao, 
 H. Nakai, M. Klene, X. Li, J. E. Knox, H. P. Hratchian, J. B. Cross, 
 V. Bakken, C. Adamo, J. Jaramillo, R. Gomperts, R. E. Stratmann, 
 O. Yazyev, A. J. Austin, R. Cammi, C. Pomelli, J. W. Ochterski, 
 P. Y. Ayala, K. Morokuma, G. A. Voth, P. Salvador, J. J. Dannenberg, 
 V. G. Zakrzewski, S. Dapprich, A. D. Daniels, M. C. Strain, 
 O. Farkas, D. K. Malick, A. D. Rabuck, K. Raghavachari, 
 J. B. Foresman, J. V. Ortiz, Q. Cui, A. G. Baboul, S. Clifford, 
 J. Cioslowski, B. B. Stefanov, G. Liu, A. Liashenko, P. Piskorz, 
 I. Komaromi, R. L. Martin, D. J. Fox, T. Keith, M. A. Al-Laham, 
 C. Y. Peng, A. Nanayakkara, M. Challacombe, P. M. W. Gill, 
 B. Johnson, W. Chen, M. W. Wong, C. Gonzalez, and J. A. Pople, 
 Gaussian, Inc., Wallingford CT, 2004.
 
 ******************************************
 Gaussian 03:  AM64L-G03RevE.01 11-Sep-2007
                 4-Jul-2014 
 ******************************************
 %chk=CO_Geoopt_B3LYP_TZVP.chk
 Default route: MaxDisk=200000000
 --------------------------------
 # opt=(tight,calcall) b3lyp tzvp
 --------------------------------
 1/7=10,10=4,14=-1,18=20,26=3,38=1/1,3;
 2/9=110,17=6,18=5,40=1/2;
 3/5=19,7=101,11=2,16=1,25=1,30=1,74=-5/1,2,3;
 4//1;
 5/5=2,38=5/2;
 8/6=4,10=90,11=11/1;
 11/6=1,8=1,9=11,15=111,16=1/1,2,10;
 10/6=1/2;
 6/7=2,8=2,9=2,10=2,18=1,28=1/1;
 7/10=1,25=1/1,2,3,16;
 1/10=4,14=-1,18=20/3(3);
 2/9=110/2;
 7/8=1,9=1,25=1,44=-1/16;
 99//99;
 2/9=110/2;
 3/5=19,7=101,11=2,16=1,25=1,30=1,74=-5/1,2,3;
 4/5=5,16=3/1;
 5/5=2,38=5/2;
 8/6=4,10=90,11=11/1;
 11/6=1,8=1,9=11,15=111,16=1/1,2,10;
 10/6=1/2;
 7/10=1,25=1/1,2,3,16;
 1/10=4,14=-1,18=20/3(-8);
 2/9=110/2;
 6/7=2,8=2,9=2,10=2,18=1,19=2,28=1/1;
 7/8=1,9=1,25=1,44=-1/16;
 99//99;
 -------------------
 Title Card Required
 -------------------
 Symbolic Z-matrix:
 Charge =  0 Multiplicity = 1
 C                    -1.52239  -0.8806    0. 
 O                    -1.04571  -0.20649   1.16759 
 

 GradGradGradGradGradGradGradGradGradGradGradGradGradGradGradGradGradGrad
 Berny optimization.
 Initialization pass.
                           ----------------------------
                           !    Initial Parameters    !
                           ! (Angstroms and Degrees)  !
 --------------------------                            --------------------------
 ! Name  Definition              Value          Derivative Info.                !
 --------------------------------------------------------------------------------
 ! R1    R(1,2)                  1.43           calculate D2E/DX2 analytically  !
 --------------------------------------------------------------------------------
 Trust Radius=3.00D-01 FncErr=1.00D-07 GrdErr=1.00D-06
 Number of steps in this run=  20 maximum allowed number of steps= 100.
 GradGradGradGradGradGradGradGradGradGradGradGradGradGradGradGradGradGrad

                          Input orientation:                          
 ---------------------------------------------------------------------
 Center     Atomic     Atomic              Coordinates (Angstroms)
 Number     Number      Type              X           Y           Z
 ---------------------------------------------------------------------
    1          6             0       -1.522388   -0.880597    0.000000
    2          8             0       -1.045713   -0.206495    1.167590
 ---------------------------------------------------------------------
 Stoichiometry    CO
 Framework group  C*V[C*(CO)]
 Deg. of freedom     1
 Full point group                 C*V
 Largest Abelian subgroup         C2V     NOp   4
 Largest concise Abelian subgroup C1      NOp   1
                         Standard orientation:                         
 ---------------------------------------------------------------------
 Center     Atomic     Atomic              Coordinates (Angstroms)
 Number     Number      Type              X           Y           Z
 ---------------------------------------------------------------------
    1          6             0        0.000000    0.000000   -0.817143
    2          8             0        0.000000    0.000000    0.612857
 ---------------------------------------------------------------------
 Rotational constants (GHZ):      0.0000000     36.0463335     36.0463335
 Standard basis: TZVP (5D, 7F)
 There are    20 symmetry adapted basis functions of A1  symmetry.
 There are     2 symmetry adapted basis functions of A2  symmetry.
 There are     8 symmetry adapted basis functions of B1  symmetry.
 There are     8 symmetry adapted basis functions of B2  symmetry.
 Integral buffers will be    131072 words long.
 Raffenetti 2 integral format.
 Two-electron integral symmetry is turned on.
    38 basis functions,    70 primitive gaussians,    40 cartesian basis functions
     7 alpha electrons        7 beta electrons
       nuclear repulsion energy        17.7625916007 Hartrees.
 NAtoms=    2 NActive=    2 NUniq=    2 SFac= 7.50D-01 NAtFMM=   80 NAOKFM=F Big=F
 One-electron integrals computed using PRISM.
 NBasis=    38 RedAO= T  NBF=    20     2     8     8
 NBsUse=    38 1.00D-06 NBFU=    20     2     8     8
 Harris functional with IExCor=  402 diagonalized for initial guess.
 ExpMin= 9.52D-02 ExpMax= 2.70D+04 ExpMxC= 9.22D+02 IAcc=2 IRadAn=         4 AccDes= 0.00D+00
 HarFok:  IExCor= 402 AccDes= 0.00D+00 IRadAn=         4 IDoV=1
 ScaDFX=  1.000000  1.000000  1.000000  1.000000
 Initial guess orbital symmetries:
       Occupied  (SG) (SG) (SG) (SG) (PI) (PI) (SG)
       Virtual   (PI) (PI) (SG) (SG) (PI) (PI) (SG) (SG) (PI) (PI)
                 (SG) (SG) (PI) (PI) (SG) (PI) (PI) (DLTA) (DLTA)
                 (SG) (SG) (PI) (PI) (DLTA) (DLTA) (PI) (PI) (SG)
                 (SG) (SG) (SG)
 The electronic state of the initial guess is 1-SG.
 Requested convergence on RMS density matrix=1.00D-08 within 128 cycles.
 Requested convergence on MAX density matrix=1.00D-06.
 Requested convergence on             energy=1.00D-06.
 No special actions if energy rises.
 Keep R1 integrals in memory in canonical form, NReq=     2055293.
 Integral accuracy reduced to 1.0D-05 until final iterations.
 Initial convergence to 1.0D-05 achieved.  Increase integral accuracy.
 SCF Done:  E(RB+HF-LYP) =  -113.247426073     A.U. after   12 cycles
             Convg  =    0.7517D-08             -V/T =  2.0102
             S**2   =   0.0000
 Range of M.O.s used for correlation:     1    38
 NBasis=    38 NAE=     7 NBE=     7 NFC=     0 NFV=     0
 NROrb=     38 NOA=     7 NOB=     7 NVA=    31 NVB=    31
 Symmetrizing basis deriv contribution to polar:
 IMax=3 JMax=2 DiffMx= 0.00D+00
 G2DrvN: will do    3 centers at a time, making    1 passes doing MaxLOS=2.
 FoFDir/FoFCou used for L=0 through L=2.
 DoAtom=TT
          Differentiating once with respect to electric field.
                with respect to dipole field.
          Differentiating once with respect to nuclear coordinates.
          Store integrals in memory, NReq=     1157134.
          There are   9 degrees of freedom in the 1st order CPHF.
     6 vectors were produced by pass  0.
 AX will form   6 AO Fock derivatives at one time.
     6 vectors were produced by pass  1.
     6 vectors were produced by pass  2.
     6 vectors were produced by pass  3.
     6 vectors were produced by pass  4.
     6 vectors were produced by pass  5.
     2 vectors were produced by pass  6.
     1 vectors were produced by pass  7.
     1 vectors were produced by pass  8.
 Inv2:  IOpt= 1 Iter= 1 AM= 4.75D-16 Conv= 1.00D-12.
 Inverted reduced A of dimension   40 with in-core refinement.
 Isotropic polarizability for W=    0.000000       13.74 Bohr**3.
 End of Minotr Frequency-dependent properties file   721 does not exist.

 **********************************************************************

            Population analysis using the SCF density.

 **********************************************************************

 Orbital symmetries:
       Occupied  (SG) (SG) (SG) (SG) (PI) (PI) (SG)
       Virtual   (PI) (PI) (SG) (SG) (PI) (PI) (SG) (SG) (PI) (PI)
                 (SG) (SG) (PI) (PI) (SG) (PI) (PI) (DLTA) (DLTA)
                 (SG) (PI) (PI) (SG) (DLTA) (DLTA) (PI) (PI) (SG)
                 (SG) (SG) (SG)
 The electronic state is 1-SG.
 Alpha  occ. eigenvalues --  -19.24160 -10.38259  -1.03258  -0.59095  -0.40321
 Alpha  occ. eigenvalues --   -0.40321  -0.39995
 Alpha virt. eigenvalues --   -0.12992  -0.12992   0.08635   0.13907   0.20946
 Alpha virt. eigenvalues --    0.20946   0.27065   0.41241   0.46715   0.46715
 Alpha virt. eigenvalues --    0.68013   1.19397   1.33037   1.33037   1.34253
 Alpha virt. eigenvalues --    1.56795   1.56795   1.60909   1.60913   2.05399
 Alpha virt. eigenvalues --    2.53189   2.53189   2.53608   2.57203   2.57203
 Alpha virt. eigenvalues --    2.84216   2.84216   2.89562   3.74452  21.19515
 Alpha virt. eigenvalues --   43.09102
          Condensed to atoms (all electrons):
              1          2
     1  C    5.407706   0.360731
     2  O    0.360731   7.870832
 Mulliken atomic charges:
              1
     1  C    0.231563
     2  O   -0.231563
 Sum of Mulliken charges=   0.00000
 Atomic charges with hydrogens summed into heavy atoms:
              1
     1  C    0.231563
     2  O   -0.231563
 Sum of Mulliken charges=   0.00000
 APT atomic charges:
              1
     1  C    0.341827
     2  O   -0.341827
 Sum of APT charges=   0.00000
 APT Atomic charges with hydrogens summed into heavy atoms:
              1
     1  C    0.341827
     2  O   -0.341827
 Sum of APT charges=   0.00000
 Electronic spatial extent (au):  <R**2>=    50.2824
 Charge=     0.0000 electrons
 Dipole moment (field-independent basis, Debye):
    X=     0.0000    Y=     0.0000    Z=    -1.0279  Tot=     1.0279
 Quadrupole moment (field-independent basis, Debye-Ang):
   XX=   -10.8373   YY=   -10.8373   ZZ=   -12.2813
   XY=     0.0000   XZ=     0.0000   YZ=     0.0000
 Traceless Quadrupole moment (field-independent basis, Debye-Ang):
   XX=     0.4814   YY=     0.4814   ZZ=    -0.9627
   XY=     0.0000   XZ=     0.0000   YZ=     0.0000
 Octapole moment (field-independent basis, Debye-Ang**2):
  XXX=     0.0000  YYY=     0.0000  ZZZ=     5.9924  XYY=     0.0000
  XXY=     0.0000  XXZ=     1.0405  XZZ=     0.0000  YZZ=     0.0000
  YYZ=     1.0405  XYZ=     0.0000
 Hexadecapole moment (field-independent basis, Debye-Ang**3):
 XXXX=   -10.3337 YYYY=   -10.3337 ZZZZ=   -50.5819 XXXY=     0.0000
 XXXZ=     0.0000 YYYX=     0.0000 YYYZ=     0.0000 ZZZX=     0.0000
 ZZZY=     0.0000 XXYY=    -3.4446 XXZZ=    -9.5093 YYZZ=    -9.5093
 XXYZ=     0.0000 YYXZ=     0.0000 ZZXY=     0.0000
 N-N= 1.776259160066D+01 E-N=-3.012594591873D+02  KE= 1.121078826731D+02
 Symmetry A1   KE= 1.040680220910D+02
 Symmetry A2   KE= 3.147759223870D-34
 Symmetry B1   KE= 4.019930291065D+00
 Symmetry B2   KE= 4.019930291065D+00
  Exact polarizability:   9.802   0.000   9.802   0.000   0.000  21.617
 Approx polarizability:  12.649   0.000  12.649   0.000   0.000  55.326
 ***** Axes restored to original set *****
 -------------------------------------------------------------------
 Center     Atomic                   Forces (Hartrees/Bohr)
 Number     Number              X              Y              Z
 -------------------------------------------------------------------
    1          6           0.089091693    0.125991337    0.218225450
    2          8          -0.089091693   -0.125991337   -0.218225450
 -------------------------------------------------------------------
 Cartesian Forces:  Max     0.218225450 RMS     0.154308666

 GradGradGradGradGradGradGradGradGradGradGradGradGradGradGradGradGradGrad
 Berny optimization.
 Internal  Forces:  Max     0.267270450 RMS     0.267270450
 Search for a local minimum.
 Step number   1 out of a maximum of  20
 All quantities printed in internal units (Hartrees-Bohrs-Radians)
 Second derivative matrix not updated -- analytic derivatives used.
 The second derivative matrix:
                          R1
           R1           0.02782
     Eigenvalues ---    0.02782
 RFO step:  Lambda=-2.53721211D-01.
 Linear search not attempted -- first point.
 Maximum step size (   0.300) exceeded in Quadratic search.
    -- Step size scaled by   0.316
 Iteration  1 RMS(Cart)=  0.14142136 RMS(Int)=  0.10000000
 Iteration  2 RMS(Cart)=  0.07071068 RMS(Int)=  0.00000000
 Iteration  3 RMS(Cart)=  0.00000000 RMS(Int)=  0.00000000
 Variable       Old X    -DE/DX   Delta X   Delta X   Delta X     New X
                                 (Linear)    (Quad)   (Total)
    R1        2.70231  -0.26727   0.00000  -0.30000  -0.30000   2.40231
         Item               Value     Threshold  Converged?
 Maximum Force            0.267270     0.000015     NO 
 RMS     Force            0.267270     0.000010     NO 
 Maximum Displacement     0.122475     0.000060     NO 
 RMS     Displacement     0.212132     0.000040     NO 
 Predicted change in Energy=-7.892914D-02
 GradGradGradGradGradGradGradGradGradGradGradGradGradGradGradGradGradGrad

                          Input orientation:                          
 ---------------------------------------------------------------------
 Center     Atomic     Atomic              Coordinates (Angstroms)
 Number     Number      Type              X           Y           Z
 ---------------------------------------------------------------------
    1          6             0       -1.495929   -0.843179    0.064811
    2          8             0       -1.072172   -0.243913    1.102780
 ---------------------------------------------------------------------
 Stoichiometry    CO
 Framework group  C*V[C*(CO)]
 Deg. of freedom     1
 Full point group                 C*V
 Largest Abelian subgroup         C2V     NOp   4
 Largest concise Abelian subgroup C1      NOp   1
                         Standard orientation:                         
 ---------------------------------------------------------------------
 Center     Atomic     Atomic              Coordinates (Angstroms)
 Number     Number      Type              X           Y           Z
 ---------------------------------------------------------------------
    1          6             0        0.000000    0.000000   -0.726427
    2          8             0        0.000000    0.000000    0.544820
 ---------------------------------------------------------------------
 Rotational constants (GHZ):      0.0000000     45.6113997     45.6113997
 Standard basis: TZVP (5D, 7F)
 There are    20 symmetry adapted basis functions of A1  symmetry.
 There are     2 symmetry adapted basis functions of A2  symmetry.
 There are     8 symmetry adapted basis functions of B1  symmetry.
 There are     8 symmetry adapted basis functions of B2  symmetry.
 Integral buffers will be    131072 words long.
 Raffenetti 2 integral format.
 Two-electron integral symmetry is turned on.
    38 basis functions,    70 primitive gaussians,    40 cartesian basis functions
     7 alpha electrons        7 beta electrons
       nuclear repulsion energy        19.9807820466 Hartrees.
 NAtoms=    2 NActive=    2 NUniq=    2 SFac= 7.50D-01 NAtFMM=   80 NAOKFM=F Big=F
 One-electron integrals computed using PRISM.
 NBasis=    38 RedAO= T  NBF=    20     2     8     8
 NBsUse=    38 1.00D-06 NBFU=    20     2     8     8
 Initial guess read from the read-write file:
 Initial guess orbital symmetries:
       Occupied  (SG) (SG) (SG) (SG) (PI) (PI) (SG)
       Virtual   (PI) (PI) (SG) (SG) (PI) (PI) (SG) (SG) (PI) (PI)
                 (SG) (SG) (PI) (PI) (SG) (PI) (PI) (DLTA) (DLTA)
                 (SG) (PI) (PI) (SG) (DLTA) (DLTA) (PI) (PI) (SG)
                 (SG) (SG) (SG)
 Harris functional with IExCor=  402 diagonalized for initial guess.
 ExpMin= 9.52D-02 ExpMax= 2.70D+04 ExpMxC= 9.22D+02 IAcc=2 IRadAn=         4 AccDes= 0.00D+00
 HarFok:  IExCor= 402 AccDes= 0.00D+00 IRadAn=         4 IDoV=1
 ScaDFX=  1.000000  1.000000  1.000000  1.000000
 Requested convergence on RMS density matrix=1.00D-08 within 128 cycles.
 Requested convergence on MAX density matrix=1.00D-06.
 Requested convergence on             energy=1.00D-06.
 No special actions if energy rises.
 Keep R1 integrals in memory in canonical form, NReq=     2055293.
 Integral accuracy reduced to 1.0D-05 until final iterations.
 Initial convergence to 1.0D-05 achieved.  Increase integral accuracy.
 SCF Done:  E(RB+HF-LYP) =  -113.322146644     A.U. after   11 cycles
             Convg  =    0.5855D-08             -V/T =  2.0083
             S**2   =   0.0000
 Range of M.O.s used for correlation:     1    38
 NBasis=    38 NAE=     7 NBE=     7 NFC=     0 NFV=     0
 NROrb=     38 NOA=     7 NOB=     7 NVA=    31 NVB=    31
 Symmetrizing basis deriv contribution to polar:
 IMax=3 JMax=2 DiffMx= 0.00D+00
 G2DrvN: will do    3 centers at a time, making    1 passes doing MaxLOS=2.
 FoFDir/FoFCou used for L=0 through L=2.
 DoAtom=TT
          Differentiating once with respect to electric field.
                with respect to dipole field.
          Differentiating once with respect to nuclear coordinates.
          Store integrals in memory, NReq=     1157134.
          There are   9 degrees of freedom in the 1st order CPHF.
     6 vectors were produced by pass  0.
 AX will form   6 AO Fock derivatives at one time.
     6 vectors were produced by pass  1.
     6 vectors were produced by pass  2.
     6 vectors were produced by pass  3.
     6 vectors were produced by pass  4.
     6 vectors were produced by pass  5.
     2 vectors were produced by pass  6.
     1 vectors were produced by pass  7.
 Inv2:  IOpt= 1 Iter= 1 AM= 4.70D-16 Conv= 1.00D-12.
 Inverted reduced A of dimension   39 with in-core refinement.
 Isotropic polarizability for W=    0.000000       12.43 Bohr**3.
 End of Minotr Frequency-dependent properties file   721 does not exist.
 ***** Axes restored to original set *****
 -------------------------------------------------------------------
 Center     Atomic                   Forces (Hartrees/Bohr)
 Number     Number              X              Y              Z
 -------------------------------------------------------------------
    1          6           0.070800827    0.100124833    0.173422928
    2          8          -0.070800827   -0.100124833   -0.173422928
 -------------------------------------------------------------------
 Cartesian Forces:  Max     0.173422928 RMS     0.122628506

 GradGradGradGradGradGradGradGradGradGradGradGradGradGradGradGradGradGrad
 Berny optimization.
 Internal  Forces:  Max     0.212398802 RMS     0.212398802
 Search for a local minimum.
 Step number   2 out of a maximum of  20
 All quantities printed in internal units (Hartrees-Bohrs-Radians)
 Second derivative matrix not updated -- analytic derivatives used.
 Trust test= 9.47D-01 RLast= 3.00D-01 DXMaxT set to 4.24D-01
 The second derivative matrix:
                          R1
           R1           0.40263
     Eigenvalues ---    0.40263
 RFO step:  Lambda= 0.00000000D+00.
 Quintic linear search produced a step of  0.92329.
 Iteration  1 RMS(Cart)=  0.14142136 RMS(Int)=  0.07698698
 Iteration  2 RMS(Cart)=  0.05443802 RMS(Int)=  0.00000000
 Iteration  3 RMS(Cart)=  0.00000000 RMS(Int)=  0.00000000
 Variable       Old X    -DE/DX   Delta X   Delta X   Delta X     New X
                                 (Linear)    (Quad)   (Total)
    R1        2.40231  -0.21240  -0.27699   0.00000  -0.27699   2.12532
         Item               Value     Threshold  Converged?
 Maximum Force            0.212399     0.000015     NO 
 RMS     Force            0.212399     0.000010     NO 
 Maximum Displacement     0.113079     0.000060     NO 
 RMS     Displacement     0.195859     0.000040     NO 
 Predicted change in Energy=-4.338646D-02
 GradGradGradGradGradGradGradGradGradGradGradGradGradGradGradGradGradGrad

                          Input orientation:                          
 ---------------------------------------------------------------------
 Center     Atomic     Atomic              Coordinates (Angstroms)
 Number     Number      Type              X           Y           Z
 ---------------------------------------------------------------------
    1          6             0       -1.471499   -0.808631    0.124650
    2          8             0       -1.096602   -0.278461    1.042941
 ---------------------------------------------------------------------
 Stoichiometry    CO
 Framework group  C*V[C*(CO)]
 Deg. of freedom     1
 Full point group                 C*V
 Largest Abelian subgroup         C2V     NOp   4
 Largest concise Abelian subgroup C1      NOp   1
                         Standard orientation:                         
 ---------------------------------------------------------------------
 Center     Atomic     Atomic              Coordinates (Angstroms)
 Number     Number      Type              X           Y           Z
 ---------------------------------------------------------------------
    1          6             0        0.000000    0.000000   -0.642670
    2          8             0        0.000000    0.000000    0.482002
 ---------------------------------------------------------------------
 Rotational constants (GHZ):      0.0000000     58.2749198     58.2749198
 Standard basis: TZVP (5D, 7F)
 There are    20 symmetry adapted basis functions of A1  symmetry.
 There are     2 symmetry adapted basis functions of A2  symmetry.
 There are     8 symmetry adapted basis functions of B1  symmetry.
 There are     8 symmetry adapted basis functions of B2  symmetry.
 Integral buffers will be    131072 words long.
 Raffenetti 2 integral format.
 Two-electron integral symmetry is turned on.
    38 basis functions,    70 primitive gaussians,    40 cartesian basis functions
     7 alpha electrons        7 beta electrons
       nuclear repulsion energy        22.5848195353 Hartrees.
 NAtoms=    2 NActive=    2 NUniq=    2 SFac= 7.50D-01 NAtFMM=   80 NAOKFM=F Big=F
 One-electron integrals computed using PRISM.
 NBasis=    38 RedAO= T  NBF=    20     2     8     8
 NBsUse=    38 1.00D-06 NBFU=    20     2     8     8
 Initial guess read from the read-write file:
 Initial guess orbital symmetries:
       Occupied  (SG) (SG) (SG) (SG) (PI) (PI) (SG)
       Virtual   (PI) (PI) (SG) (SG) (PI) (PI) (SG) (SG) (PI) (PI)
                 (SG) (SG) (SG) (PI) (PI) (PI) (PI) (DLTA) (DLTA)
                 (SG) (PI) (PI) (SG) (DLTA) (DLTA) (SG) (PI) (PI)
                 (SG) (SG) (SG)
 Harris functional with IExCor=  402 diagonalized for initial guess.
 ExpMin= 9.52D-02 ExpMax= 2.70D+04 ExpMxC= 9.22D+02 IAcc=2 IRadAn=         4 AccDes= 0.00D+00
 HarFok:  IExCor= 402 AccDes= 0.00D+00 IRadAn=         4 IDoV=1
 ScaDFX=  1.000000  1.000000  1.000000  1.000000
 Requested convergence on RMS density matrix=1.00D-08 within 128 cycles.
 Requested convergence on MAX density matrix=1.00D-06.
 Requested convergence on             energy=1.00D-06.
 No special actions if energy rises.
 Keep R1 integrals in memory in canonical form, NReq=     2055293.
 Integral accuracy reduced to 1.0D-05 until final iterations.
 Initial convergence to 1.0D-05 achieved.  Increase integral accuracy.
 SCF Done:  E(RB+HF-LYP) =  -113.356514749     A.U. after   11 cycles
             Convg  =    0.4889D-08             -V/T =  2.0039
             S**2   =   0.0000
 Range of M.O.s used for correlation:     1    38
 NBasis=    38 NAE=     7 NBE=     7 NFC=     0 NFV=     0
 NROrb=     38 NOA=     7 NOB=     7 NVA=    31 NVB=    31
 Symmetrizing basis deriv contribution to polar:
 IMax=3 JMax=2 DiffMx= 0.00D+00
 G2DrvN: will do    3 centers at a time, making    1 passes doing MaxLOS=2.
 FoFDir/FoFCou used for L=0 through L=2.
 DoAtom=TT
          Differentiating once with respect to electric field.
                with respect to dipole field.
          Differentiating once with respect to nuclear coordinates.
          Store integrals in memory, NReq=     1157134.
          There are   9 degrees of freedom in the 1st order CPHF.
     6 vectors were produced by pass  0.
 AX will form   6 AO Fock derivatives at one time.
     6 vectors were produced by pass  1.
     6 vectors were produced by pass  2.
     6 vectors were produced by pass  3.
     6 vectors were produced by pass  4.
     6 vectors were produced by pass  5.
     2 vectors were produced by pass  6.
 Inv2:  IOpt= 1 Iter= 1 AM= 5.78D-16 Conv= 1.00D-12.
 Inverted reduced A of dimension   38 with in-core refinement.
 Isotropic polarizability for W=    0.000000       11.38 Bohr**3.
 End of Minotr Frequency-dependent properties file   721 does not exist.
 ***** Axes restored to original set *****
 -------------------------------------------------------------------
 Center     Atomic                   Forces (Hartrees/Bohr)
 Number     Number              X              Y              Z
 -------------------------------------------------------------------
    1          6          -0.001666273   -0.002356404   -0.004081449
    2          8           0.001666273    0.002356404    0.004081449
 -------------------------------------------------------------------
 Cartesian Forces:  Max     0.004081449 RMS     0.002886020

 GradGradGradGradGradGradGradGradGradGradGradGradGradGradGradGradGradGrad
 Berny optimization.
 Internal  Forces:  Max     0.004998733 RMS     0.004998733
 Search for a local minimum.
 Step number   3 out of a maximum of  20
 All quantities printed in internal units (Hartrees-Bohrs-Radians)
 Second derivative matrix not updated -- analytic derivatives used.
 Trust test= 7.92D-01 RLast= 2.77D-01 DXMaxT set to 6.00D-01
 The second derivative matrix:
                          R1
           R1           1.29587
     Eigenvalues ---    1.29587
 RFO step:  Lambda= 0.00000000D+00.
 Quintic linear search produced a step of -0.01403.
 Iteration  1 RMS(Cart)=  0.00274733 RMS(Int)=  0.00000000
 Iteration  2 RMS(Cart)=  0.00000000 RMS(Int)=  0.00000000
 Variable       Old X    -DE/DX   Delta X   Delta X   Delta X     New X
                                 (Linear)    (Quad)   (Total)
    R1        2.12532   0.00500   0.00389   0.00000   0.00389   2.12921
         Item               Value     Threshold  Converged?
 Maximum Force            0.004999     0.000015     NO 
 RMS     Force            0.004999     0.000010     NO 
 Maximum Displacement     0.001586     0.000060     NO 
 RMS     Displacement     0.002747     0.000040     NO 
 Predicted change in Energy=-9.640604D-06
 GradGradGradGradGradGradGradGradGradGradGradGradGradGradGradGradGradGrad

                          Input orientation:                          
 ---------------------------------------------------------------------
 Center     Atomic     Atomic              Coordinates (Angstroms)
 Number     Number      Type              X           Y           Z
 ---------------------------------------------------------------------
    1          6             0       -1.471842   -0.809116    0.123810
    2          8             0       -1.096259   -0.277976    1.043780
 ---------------------------------------------------------------------
 Stoichiometry    CO
 Framework group  C*V[C*(CO)]
 Deg. of freedom     1
 Full point group                 C*V
 Largest Abelian subgroup         C2V     NOp   4
 Largest concise Abelian subgroup C1      NOp   1
                         Standard orientation:                         
 ---------------------------------------------------------------------
 Center     Atomic     Atomic              Coordinates (Angstroms)
 Number     Number      Type              X           Y           Z
 ---------------------------------------------------------------------
    1          6             0        0.000000    0.000000   -0.643844
    2          8             0        0.000000    0.000000    0.482883
 ---------------------------------------------------------------------
 Rotational constants (GHZ):      0.0000000     58.0624371     58.0624371
 Standard basis: TZVP (5D, 7F)
 There are    20 symmetry adapted basis functions of A1  symmetry.
 There are     2 symmetry adapted basis functions of A2  symmetry.
 There are     8 symmetry adapted basis functions of B1  symmetry.
 There are     8 symmetry adapted basis functions of B2  symmetry.
 Integral buffers will be    131072 words long.
 Raffenetti 2 integral format.
 Two-electron integral symmetry is turned on.
    38 basis functions,    70 primitive gaussians,    40 cartesian basis functions
     7 alpha electrons        7 beta electrons
       nuclear repulsion energy        22.5436074281 Hartrees.
 NAtoms=    2 NActive=    2 NUniq=    2 SFac= 7.50D-01 NAtFMM=   80 NAOKFM=F Big=F
 One-electron integrals computed using PRISM.
 NBasis=    38 RedAO= T  NBF=    20     2     8     8
 NBsUse=    38 1.00D-06 NBFU=    20     2     8     8
 Initial guess read from the read-write file:
 Initial guess orbital symmetries:
       Occupied  (SG) (SG) (SG) (SG) (PI) (PI) (SG)
       Virtual   (PI) (PI) (SG) (SG) (PI) (PI) (SG) (PI) (PI) (SG)
                 (SG) (SG) (PI) (PI) (SG) (DLTA) (DLTA) (PI) (PI)
                 (SG) (PI) (PI) (DLTA) (DLTA) (SG) (SG) (PI) (PI)
                 (SG) (SG) (SG)
 Requested convergence on RMS density matrix=1.00D-08 within 128 cycles.
 Requested convergence on MAX density matrix=1.00D-06.
 Requested convergence on             energy=1.00D-06.
 No special actions if energy rises.
 Keep R1 integrals in memory in canonical form, NReq=     2055293.
 SCF Done:  E(RB+HF-LYP) =  -113.356524437     A.U. after    7 cycles
             Convg  =    0.2299D-08             -V/T =  2.0040
             S**2   =   0.0000
 Range of M.O.s used for correlation:     1    38
 NBasis=    38 NAE=     7 NBE=     7 NFC=     0 NFV=     0
 NROrb=     38 NOA=     7 NOB=     7 NVA=    31 NVB=    31
 Symmetrizing basis deriv contribution to polar:
 IMax=3 JMax=2 DiffMx= 0.00D+00
 G2DrvN: will do    3 centers at a time, making    1 passes doing MaxLOS=2.
 FoFDir/FoFCou used for L=0 through L=2.
 DoAtom=TT
          Differentiating once with respect to electric field.
                with respect to dipole field.
          Differentiating once with respect to nuclear coordinates.
          Store integrals in memory, NReq=     1157134.
          There are   9 degrees of freedom in the 1st order CPHF.
     6 vectors were produced by pass  0.
 AX will form   6 AO Fock derivatives at one time.
     6 vectors were produced by pass  1.
     6 vectors were produced by pass  2.
     6 vectors were produced by pass  3.
     6 vectors were produced by pass  4.
     6 vectors were produced by pass  5.
     2 vectors were produced by pass  6.
 Inv2:  IOpt= 1 Iter= 1 AM= 4.66D-16 Conv= 1.00D-12.
 Inverted reduced A of dimension   38 with in-core refinement.
 Isotropic polarizability for W=    0.000000       11.40 Bohr**3.
 End of Minotr Frequency-dependent properties file   721 does not exist.
 ***** Axes restored to original set *****
 -------------------------------------------------------------------
 Center     Atomic                   Forces (Hartrees/Bohr)
 Number     Number              X              Y              Z
 -------------------------------------------------------------------
    1          6          -0.000000073   -0.000000104   -0.000000180
    2          8           0.000000073    0.000000104    0.000000180
 -------------------------------------------------------------------
 Cartesian Forces:  Max     0.000000180 RMS     0.000000127

 GradGradGradGradGradGradGradGradGradGradGradGradGradGradGradGradGradGrad
 Berny optimization.
 Internal  Forces:  Max     0.000000220 RMS     0.000000220
 Search for a local minimum.
 Step number   4 out of a maximum of  20
 All quantities printed in internal units (Hartrees-Bohrs-Radians)
 Second derivative matrix not updated -- analytic derivatives used.
 Trust test= 1.00D+00 RLast= 3.89D-03 DXMaxT set to 6.00D-01
 The second derivative matrix:
                          R1
           R1           1.27718
     Eigenvalues ---    1.27718
 RFO step:  Lambda= 0.00000000D+00.
 Quartic linear search produced a step of  0.00004.
 Iteration  1 RMS(Cart)=  0.00000012 RMS(Int)=  0.00000000
 Variable       Old X    -DE/DX   Delta X   Delta X   Delta X     New X
                                 (Linear)    (Quad)   (Total)
    R1        2.12921   0.00000   0.00000   0.00000   0.00000   2.12921
         Item               Value     Threshold  Converged?
 Maximum Force            0.000000     0.000015     YES
 RMS     Force            0.000000     0.000010     YES
 Maximum Displacement     0.000000     0.000060     YES
 RMS     Displacement     0.000000     0.000040     YES
 Predicted change in Energy=-1.892547D-14
 Optimization completed.
    -- Stationary point found.
                           ----------------------------
                           !   Optimized Parameters   !
                           ! (Angstroms and Degrees)  !
 --------------------------                            --------------------------
 ! Name  Definition              Value          Derivative Info.                !
 --------------------------------------------------------------------------------
 ! R1    R(1,2)                  1.1267         -DE/DX =    0.0                 !
 --------------------------------------------------------------------------------
 GradGradGradGradGradGradGradGradGradGradGradGradGradGradGradGradGradGrad

                          Input orientation:                          
 ---------------------------------------------------------------------
 Center     Atomic     Atomic              Coordinates (Angstroms)
 Number     Number      Type              X           Y           Z
 ---------------------------------------------------------------------
    1          6             0       -1.471842   -0.809116    0.123810
    2          8             0       -1.096259   -0.277976    1.043780
 ---------------------------------------------------------------------
 Stoichiometry    CO
 Framework group  C*V[C*(CO)]
 Deg. of freedom     1
 Full point group                 C*V
 Largest Abelian subgroup         C2V     NOp   4
 Largest concise Abelian subgroup C1      NOp   1
                         Standard orientation:                         
 ---------------------------------------------------------------------
 Center     Atomic     Atomic              Coordinates (Angstroms)
 Number     Number      Type              X           Y           Z
 ---------------------------------------------------------------------
    1          6             0        0.000000    0.000000   -0.643844
    2          8             0        0.000000    0.000000    0.482883
 ---------------------------------------------------------------------
 Rotational constants (GHZ):      0.0000000     58.0624371     58.0624371

 **********************************************************************

            Population analysis using the SCF density.

 **********************************************************************

 Orbital symmetries:
       Occupied  (SG) (SG) (SG) (SG) (PI) (PI) (SG)
       Virtual   (PI) (PI) (SG) (SG) (PI) (PI) (SG) (PI) (PI) (SG)
                 (SG) (SG) (PI) (PI) (SG) (DLTA) (DLTA) (PI) (PI)
                 (SG) (PI) (PI) (DLTA) (DLTA) (SG) (SG) (PI) (PI)
                 (SG) (SG) (SG)
 The electronic state is 1-SG.
 Alpha  occ. eigenvalues --  -19.23970 -10.29670  -1.17730  -0.58418  -0.48598
 Alpha  occ. eigenvalues --   -0.48598  -0.38641
 Alpha virt. eigenvalues --   -0.03865  -0.03865   0.11410   0.17929   0.21019
 Alpha virt. eigenvalues --    0.21019   0.37603   0.47624   0.47624   0.60609
 Alpha virt. eigenvalues --    0.70058   1.24866   1.35706   1.35706   1.36402
 Alpha virt. eigenvalues --    1.60226   1.60227   1.66758   1.66758   2.30701
 Alpha virt. eigenvalues --    2.52583   2.52583   2.58826   2.58826   2.72234
 Alpha virt. eigenvalues --    2.96773   3.23806   3.23806   4.21115  21.61811
 Alpha virt. eigenvalues --   43.18581
          Condensed to atoms (all electrons):
              1          2
     1  C    5.473577   0.447168
     2  O    0.447168   7.632087
 Mulliken atomic charges:
              1
     1  C    0.079255
     2  O   -0.079255
 Sum of Mulliken charges=   0.00000
 Atomic charges with hydrogens summed into heavy atoms:
              1
     1  C    0.079255
     2  O   -0.079255
 Sum of Mulliken charges=   0.00000
 APT atomic charges:
              1
     1  C    0.242803
     2  O   -0.242803
 Sum of APT charges=   0.00000
 APT Atomic charges with hydrogens summed into heavy atoms:
              1
     1  C    0.242803
     2  O   -0.242803
 Sum of APT charges=   0.00000
 Electronic spatial extent (au):  <R**2>=    40.0486
 Charge=     0.0000 electrons
 Dipole moment (field-independent basis, Debye):
    X=     0.0000    Y=     0.0000    Z=     0.0744  Tot=     0.0744
 Quadrupole moment (field-independent basis, Debye-Ang):
   XX=   -10.2383   YY=   -10.2383   ZZ=   -12.4835
   XY=     0.0000   XZ=     0.0000   YZ=     0.0000
 Traceless Quadrupole moment (field-independent basis, Debye-Ang):
   XX=     0.7484   YY=     0.7484   ZZ=    -1.4968
   XY=     0.0000   XZ=     0.0000   YZ=     0.0000
 Octapole moment (field-independent basis, Debye-Ang**2):
  XXX=     0.0000  YYY=     0.0000  ZZZ=     6.2667  XYY=     0.0000
  XXY=     0.0000  XXZ=     1.2533  XZZ=     0.0000  YZZ=     0.0000
  YYZ=     1.2533  XYZ=     0.0000
 Hexadecapole moment (field-independent basis, Debye-Ang**3):
 XXXX=    -9.3296 YYYY=    -9.3296 ZZZZ=   -37.4161 XXXY=     0.0000
 XXXZ=     0.0000 YYYX=     0.0000 YYYZ=     0.0000 ZZZX=     0.0000
 ZZZY=     0.0000 XXYY=    -3.1099 XXZZ=    -7.2805 YYZZ=    -7.2805
 XXYZ=     0.0000 YYXZ=     0.0000 ZZXY=     0.0000
 N-N= 2.254360742807D+01 E-N=-3.113136448826D+02  KE= 1.129094987949D+02
 Symmetry A1   KE= 1.046618532921D+02
 Symmetry A2   KE= 5.810480927667D-33
 Symmetry B1   KE= 4.123822751386D+00
 Symmetry B2   KE= 4.123822751386D+00
  Exact polarizability:   9.610   0.000   9.610   0.000   0.000  14.968
 Approx polarizability:  12.277   0.000  12.277   0.000   0.000  24.631
 Rotating derivatives to standard orientation.
 Full mass-weighted force constant matrix:
 Low frequencies ---   -0.0010   -0.0006   -0.0005    9.9926    9.9926 2218.6449
 Diagonal vibrational polarizability:
        0.0000000       0.0000000       0.4440848
 Harmonic frequencies (cm**-1), IR intensities (KM/Mole), Raman scattering
 activities (A**4/AMU), depolarization ratios for plane and unpolarized
 incident light, reduced masses (AMU), force constants (mDyne/A),
 and normal coordinates:
                     1
                    SG
 Frequencies --  2218.6449
 Red. masses --    13.4388
 Frc consts  --    38.9749
 IR Inten    --    81.2285
 Atom AN      X      Y      Z
   1   6     0.00   0.00   0.80
   2   8     0.00   0.00  -0.60

 -------------------
 - Thermochemistry -
 -------------------
 Temperature   298.150 Kelvin.  Pressure   1.00000 Atm.
 Atom  1 has atomic number  6 and mass  12.00000
 Atom  2 has atomic number  8 and mass  15.99491
 Molecular mass:    27.99491 amu.
 Principal axes and moments of inertia in atomic units:
                           1         2         3
     EIGENVALUES --     0.00000  31.08277  31.08277
           X            0.00000   0.48895   0.87231
           Y            0.00000   0.87231  -0.48895
           Z            1.00000   0.00000   0.00000
 This molecule is a prolate symmetric top.
 Rotational symmetry number  1.
 Rotational temperature (Kelvin)      2.78655
 Rotational constant (GHZ):          58.062437
 Zero-point vibrational energy      13270.4 (Joules/Mol)
                                    3.17171 (Kcal/Mol)
 Vibrational temperatures:   3192.13
          (Kelvin)
 
 Zero-point correction=                           0.005054 (Hartree/Particle)
 Thermal correction to Energy=                    0.007415
 Thermal correction to Enthalpy=                  0.008359
 Thermal correction to Gibbs Free Energy=        -0.014065
 Sum of electronic and zero-point Energies=           -113.351470
 Sum of electronic and thermal Energies=              -113.349109
 Sum of electronic and thermal Enthalpies=            -113.348165
 Sum of electronic and thermal Free Energies=         -113.370590
 
                     E (Thermal)             CV                S
                      KCal/Mol        Cal/Mol-Kelvin    Cal/Mol-Kelvin
 Total                    4.653              4.973             47.197
 Electronic               0.000              0.000              0.000
 Translational            0.889              2.981             35.923
 Rotational               0.592              1.987             11.273
 Vibrational              3.172              0.005              0.001
                       Q            Log10(Q)             Ln(Q)
 Total Bot       0.294831D+07          6.469572         14.896741
 Total V=0       0.622947D+09          8.794451         20.249972
 Vib (Bot)       0.473294D-02         -2.324869         -5.353208
 Vib (V=0)       0.100002D+01          0.000010          0.000022
 Electronic      0.100000D+01          0.000000          0.000000
 Translational   0.582202D+07          6.765074         15.577158
 Rotational      0.106996D+03          2.029367          4.672791
 ***** Axes restored to original set *****
 -------------------------------------------------------------------
 Center     Atomic                   Forces (Hartrees/Bohr)
 Number     Number              X              Y              Z
 -------------------------------------------------------------------
    1          6          -0.000000073   -0.000000104   -0.000000180
    2          8           0.000000073    0.000000104    0.000000180
 -------------------------------------------------------------------
 Cartesian Forces:  Max     0.000000180 RMS     0.000000127
 1\1\RECHENZENTRUM RWTH AACHEN-SRVMBFD\Freq\RB3LYP\TZVP\C1O1\JENS\04-Ju
 l-2014\0\\# opt=(tight,calcall) b3lyp tzvp\\Title Card Required\\0,1\C
 ,-1.4718418144,-0.8091156824,0.1238104386\O,-1.0962594256,-0.277976067
 6,1.0437798914\\Version=AM64L-G03RevE.01\State=1-SG\HF=-113.3565244\RM
 SD=2.299e-09\RMSF=1.269e-07\ZeroPoint=0.0050544\Thermal=0.0074151\Dipo
 le=0.009754,0.0137939,0.0238919\DipoleDeriv=0.0717986,0.1209212,0.2094
 437,0.1209212,0.157296,0.2961902,0.2094437,0.2961902,0.4993134,-0.0717
 986,-0.1209212,-0.2094437,-0.1209212,-0.157296,-0.2961902,-0.2094437,-
 0.2961902,-0.4993134\Polar=10.2052588,0.8418676,10.8005017,1.4581713,2
 .0621109,13.1816671\PG=C*V [C*(C1O1)]\NImag=0\\0.14193649,0.20068655,0
 .28383202,0.34760257,0.49157123,0.85146026,-0.14193649,-0.20068655,-0.
 34760257,0.14193649,-0.20068655,-0.28383202,-0.49157123,0.20068655,0.2
 8383202,-0.34760257,-0.49157123,-0.85146026,0.34760257,0.49157123,0.85
 146026\\0.00000007,0.00000010,0.00000018,-0.00000007,-0.00000010,-0.00
 000018\\\@


 IF YOU GET CONFUSED, LOGIC OUT YOUR DILEMMA

           --  PICKER X-RAY CORP.    DIGITAL PRINTER MANUAL CA. 1964
 Job cpu time:  0 days  0 hours  0 minutes 19.9 seconds.
 File lengths (MBytes):  RWF=     13 Int=      0 D2E=      0 Chk=      6 Scr=      1
 Normal termination of Gaussian 03 at Fri Jul  4 09:04:19 2014.
