# Supplementary material for: CO from CO2and fluctuating renewable energy via formic-acid derivatives
Source: Royal Society of Chemistry journal article supplement (doi:10.1039/c6gc01202g), 2016-01-01
Supplement: c6gc01202g3.log [file c6gc01202g3.log]

 Entering Gaussian System, Link 0=/opt/mbfd/g09//g09
 Input=Diethylamine_linear_startgeomethry.com
 Output=Diethylamine_linear_startgeomethry.log
 Initial command:
 /opt/mbfd/g09/l1.exe "/gaussianscratch/Gau-17191.inp" -scrdir="/gaussianscratch/"
 Entering Link 1 = /opt/mbfd/g09/l1.exe PID=     17195.
  
 Copyright (c) 1988,1990,1992,1993,1995,1998,2003,2009,2013,
            Gaussian, Inc.  All Rights Reserved.
  
 This is part of the Gaussian(R) 09 program.  It is based on
 the Gaussian(R) 03 system (copyright 2003, Gaussian, Inc.),
 the Gaussian(R) 98 system (copyright 1998, Gaussian, Inc.),
 the Gaussian(R) 94 system (copyright 1995, Gaussian, Inc.),
 the Gaussian 92(TM) system (copyright 1992, Gaussian, Inc.),
 the Gaussian 90(TM) system (copyright 1990, Gaussian, Inc.),
 the Gaussian 88(TM) system (copyright 1988, Gaussian, Inc.),
 the Gaussian 86(TM) system (copyright 1986, Carnegie Mellon
 University), and the Gaussian 82(TM) system (copyright 1983,
 Carnegie Mellon University). Gaussian is a federally registered
 trademark of Gaussian, Inc.
  
 This software contains proprietary and confidential information,
 including trade secrets, belonging to Gaussian, Inc.
  
 This software is provided under written license and may be
 used, copied, transmitted, or stored only in accord with that
 written license.
  
 The following legend is applicable only to US Government
 contracts under FAR:
  
                    RESTRICTED RIGHTS LEGEND
  
 Use, reproduction and disclosure by the US Government is
 subject to restrictions as set forth in subparagraphs (a)
 and (c) of the Commercial Computer Software - Restricted
 Rights clause in FAR 52.227-19.
  
 Gaussian, Inc.
 340 Quinnipiac St., Bldg. 40, Wallingford CT 06492
  
  
 ---------------------------------------------------------------
 Warning -- This program may not be used in any manner that
 competes with the business of Gaussian, Inc. or will provide
 assistance to any competitor of Gaussian, Inc.  The licensee
 of this program is prohibited from giving any competitor of
 Gaussian, Inc. access to this program.  By using this program,
 the user acknowledges that Gaussian, Inc. is engaged in the
 business of creating and licensing software in the field of
 computational chemistry and represents and warrants to the
 licensee that it is not a competitor of Gaussian, Inc. and that
 it will not use this program in any manner prohibited above.
 ---------------------------------------------------------------
  

 Cite this work as:
 Gaussian 09, Revision D.01,
 M. J. Frisch, G. W. Trucks, H. B. Schlegel, G. E. Scuseria, 
 M. A. Robb, J. R. Cheeseman, G. Scalmani, V. Barone, B. Mennucci, 
 G. A. Petersson, H. Nakatsuji, M. Caricato, X. Li, H. P. Hratchian, 
 A. F. Izmaylov, J. Bloino, G. Zheng, J. L. Sonnenberg, M. Hada, 
 M. Ehara, K. Toyota, R. Fukuda, J. Hasegawa, M. Ishida, T. Nakajima, 
 Y. Honda, O. Kitao, H. Nakai, T. Vreven, J. A. Montgomery, Jr., 
 J. E. Peralta, F. Ogliaro, M. Bearpark, J. J. Heyd, E. Brothers, 
 K. N. Kudin, V. N. Staroverov, T. Keith, R. Kobayashi, J. Normand, 
 K. Raghavachari, A. Rendell, J. C. Burant, S. S. Iyengar, J. Tomasi, 
 M. Cossi, N. Rega, J. M. Millam, M. Klene, J. E. Knox, J. B. Cross, 
 V. Bakken, C. Adamo, J. Jaramillo, R. Gomperts, R. E. Stratmann, 
 O. Yazyev, A. J. Austin, R. Cammi, C. Pomelli, J. W. Ochterski, 
 R. L. Martin, K. Morokuma, V. G. Zakrzewski, G. A. Voth, 
 P. Salvador, J. J. Dannenberg, S. Dapprich, A. D. Daniels, 
 O. Farkas, J. B. Foresman, J. V. Ortiz, J. Cioslowski, 
 and D. J. Fox, Gaussian, Inc., Wallingford CT, 2013.
 
 ******************************************
 Gaussian 09:  EM64L-G09RevD.01 24-Apr-2013
                12-Sep-2014 
 ******************************************
 %chk=DEA_linear_geoopt.chk
 %mem=3000MB
 %nprocshared=3
 Will use up to    3 processors via shared memory.
 --------------------------------
 # opt=(tight,calcall) b3lyp tzvp
 --------------------------------
 1/7=10,10=4,14=-1,18=20,19=15,26=3,38=1/1,3;
 2/9=110,12=2,17=6,18=5,40=1/2;
 3/5=19,7=101,11=2,16=1,25=1,30=1,71=2,74=-5,140=1/1,2,3;
 4//1;
 5/5=2,38=5/2;
 8/6=4,10=90,11=11/1;
 11/6=1,8=1,9=11,15=111,16=1/1,2,10;
 10/6=1/2;
 6/7=2,8=2,9=2,10=2,18=1,28=1/1;
 7/10=1,25=1/1,2,3,16;
 1/7=10,10=4,14=-1,18=20,19=15,26=3/3(3);
 2/9=110/2;
 7/8=1,9=1,25=1,44=-1/16;
 99//99;
 2/9=110/2;
 3/5=19,7=101,11=2,16=1,25=1,30=1,71=2,74=-5,140=1/1,2,3;
 4/5=5,16=3,69=1/1;
 5/5=2,38=5/2;
 8/6=4,10=90,11=11/1;
 11/6=1,8=1,9=11,15=111,16=1/1,2,10;
 10/6=1/2;
 7/10=1,25=1/1,2,3,16;
 1/7=10,10=4,14=-1,18=20,19=15,26=3/3(-8);
 2/9=110/2;
 6/7=2,8=2,9=2,10=2,18=1,19=2,28=1/1;
 7/8=1,9=1,25=1,44=-1/16;
 99//99;
 -------------------
 Title Card Required
 -------------------
 Symbolic Z-matrix:
 Charge =  0 Multiplicity = 1
 N                    -0.04697   0.58101  -0.31509 
 H                    -0.13053   1.27588  -1.04851 
 C                     1.3153    0.59968   0.21891 
 H                     1.47742   1.58562   0.66168 
 H                     1.45097  -0.13886   1.02871 
 C                     2.37217   0.36361  -0.8572 
 H                     3.37475   0.44822  -0.43125 
 H                     2.2878   -0.63128  -1.29872 
 H                     2.27068   1.09899  -1.65737 
 C                    -1.10146   0.80187   0.67131 
 H                    -1.09214  -0.02928   1.38075 
 H                    -0.92865   1.71907   1.26272 
 C                    -2.46855   0.87459   0.0033 
 H                    -2.67525  -0.04203  -0.55176 
 H                    -3.25663   1.01643   0.74559 
 H                    -2.52057   1.71302  -0.69749 
 

 GradGradGradGradGradGradGradGradGradGradGradGradGradGradGradGradGradGrad
 Berny optimization.
 Initialization pass.
                           ----------------------------
                           !    Initial Parameters    !
                           ! (Angstroms and Degrees)  !
 --------------------------                            --------------------------
 ! Name  Definition              Value          Derivative Info.                !
 --------------------------------------------------------------------------------
 ! R1    R(1,2)                  1.0138         calculate D2E/DX2 analytically  !
 ! R2    R(1,3)                  1.4633         calculate D2E/DX2 analytically  !
 ! R3    R(1,10)                 1.4607         calculate D2E/DX2 analytically  !
 ! R4    R(3,4)                  1.0929         calculate D2E/DX2 analytically  !
 ! R5    R(3,5)                  1.1044         calculate D2E/DX2 analytically  !
 ! R6    R(3,6)                  1.5267         calculate D2E/DX2 analytically  !
 ! R7    R(6,7)                  1.0926         calculate D2E/DX2 analytically  !
 ! R8    R(6,8)                  1.0917         calculate D2E/DX2 analytically  !
 ! R9    R(6,9)                  1.0915         calculate D2E/DX2 analytically  !
 ! R10   R(10,11)                1.0928         calculate D2E/DX2 analytically  !
 ! R11   R(10,12)                1.1049         calculate D2E/DX2 analytically  !
 ! R12   R(10,13)                1.5233         calculate D2E/DX2 analytically  !
 ! R13   R(13,14)                1.0913         calculate D2E/DX2 analytically  !
 ! R14   R(13,15)                1.0919         calculate D2E/DX2 analytically  !
 ! R15   R(13,16)                1.094          calculate D2E/DX2 analytically  !
 ! A1    A(2,1,3)              109.3899         calculate D2E/DX2 analytically  !
 ! A2    A(2,1,10)             108.9894         calculate D2E/DX2 analytically  !
 ! A3    A(3,1,10)             115.0682         calculate D2E/DX2 analytically  !
 ! A4    A(1,3,4)              107.3046         calculate D2E/DX2 analytically  !
 ! A5    A(1,3,5)              111.9267         calculate D2E/DX2 analytically  !
 ! A6    A(1,3,6)              112.6607         calculate D2E/DX2 analytically  !
 ! A7    A(4,3,5)              106.7387         calculate D2E/DX2 analytically  !
 ! A8    A(4,3,6)              108.807          calculate D2E/DX2 analytically  !
 ! A9    A(5,3,6)              109.1722         calculate D2E/DX2 analytically  !
 ! A10   A(3,6,7)              110.3933         calculate D2E/DX2 analytically  !
 ! A11   A(3,6,8)              111.8689         calculate D2E/DX2 analytically  !
 ! A12   A(3,6,9)              110.3764         calculate D2E/DX2 analytically  !
 ! A13   A(7,6,8)              107.4067         calculate D2E/DX2 analytically  !
 ! A14   A(7,6,9)              108.5997         calculate D2E/DX2 analytically  !
 ! A15   A(8,6,9)              108.0781         calculate D2E/DX2 analytically  !
 ! A16   A(1,10,11)            108.4956         calculate D2E/DX2 analytically  !
 ! A17   A(1,10,12)            111.9651         calculate D2E/DX2 analytically  !
 ! A18   A(1,10,13)            111.0361         calculate D2E/DX2 analytically  !
 ! A19   A(11,10,12)           106.4114         calculate D2E/DX2 analytically  !
 ! A20   A(11,10,13)           109.1871         calculate D2E/DX2 analytically  !
 ! A21   A(12,10,13)           109.6002         calculate D2E/DX2 analytically  !
 ! A22   A(10,13,14)           110.6662         calculate D2E/DX2 analytically  !
 ! A23   A(10,13,15)           110.8444         calculate D2E/DX2 analytically  !
 ! A24   A(10,13,16)           111.111          calculate D2E/DX2 analytically  !
 ! A25   A(14,13,15)           108.5522         calculate D2E/DX2 analytically  !
 ! A26   A(14,13,16)           107.9928         calculate D2E/DX2 analytically  !
 ! A27   A(15,13,16)           107.5545         calculate D2E/DX2 analytically  !
 ! D1    D(2,1,3,4)             62.7911         calculate D2E/DX2 analytically  !
 ! D2    D(2,1,3,5)            179.573          calculate D2E/DX2 analytically  !
 ! D3    D(2,1,3,6)            -56.9437         calculate D2E/DX2 analytically  !
 ! D4    D(10,1,3,4)           -60.2652         calculate D2E/DX2 analytically  !
 ! D5    D(10,1,3,5)            56.5167         calculate D2E/DX2 analytically  !
 ! D6    D(10,1,3,6)           180.0            calculate D2E/DX2 analytically  !
 ! D7    D(2,1,10,11)          172.2109         calculate D2E/DX2 analytically  !
 ! D8    D(2,1,10,12)          -70.6499         calculate D2E/DX2 analytically  !
 ! D9    D(2,1,10,13)           52.2143         calculate D2E/DX2 analytically  !
 ! D10   D(3,1,10,11)          -64.5195         calculate D2E/DX2 analytically  !
 ! D11   D(3,1,10,12)           52.6197         calculate D2E/DX2 analytically  !
 ! D12   D(3,1,10,13)          175.4839         calculate D2E/DX2 analytically  !
 ! D13   D(1,3,6,7)            176.3982         calculate D2E/DX2 analytically  !
 ! D14   D(1,3,6,8)            -64.0561         calculate D2E/DX2 analytically  !
 ! D15   D(1,3,6,9)             56.3267         calculate D2E/DX2 analytically  !
 ! D16   D(4,3,6,7)             57.5363         calculate D2E/DX2 analytically  !
 ! D17   D(4,3,6,8)            177.082          calculate D2E/DX2 analytically  !
 ! D18   D(4,3,6,9)            -62.5352         calculate D2E/DX2 analytically  !
 ! D19   D(5,3,6,7)            -58.6013         calculate D2E/DX2 analytically  !
 ! D20   D(5,3,6,8)             60.9444         calculate D2E/DX2 analytically  !
 ! D21   D(5,3,6,9)           -178.6728         calculate D2E/DX2 analytically  !
 ! D22   D(1,10,13,14)          58.1834         calculate D2E/DX2 analytically  !
 ! D23   D(1,10,13,15)         178.6797         calculate D2E/DX2 analytically  !
 ! D24   D(1,10,13,16)         -61.7851         calculate D2E/DX2 analytically  !
 ! D25   D(11,10,13,14)        -61.4009         calculate D2E/DX2 analytically  !
 ! D26   D(11,10,13,15)         59.0954         calculate D2E/DX2 analytically  !
 ! D27   D(11,10,13,16)        178.6306         calculate D2E/DX2 analytically  !
 ! D28   D(12,10,13,14)       -177.5983         calculate D2E/DX2 analytically  !
 ! D29   D(12,10,13,15)        -57.102          calculate D2E/DX2 analytically  !
 ! D30   D(12,10,13,16)         62.4332         calculate D2E/DX2 analytically  !
 --------------------------------------------------------------------------------
 Trust Radius=3.00D-01 FncErr=1.00D-07 GrdErr=1.00D-06
 Number of steps in this run=     82 maximum allowed number of steps=    100.
 GradGradGradGradGradGradGradGradGradGradGradGradGradGradGradGradGradGrad

                          Input orientation:                          
 ---------------------------------------------------------------------
 Center     Atomic      Atomic             Coordinates (Angstroms)
 Number     Number       Type             X           Y           Z
 ---------------------------------------------------------------------
      1          7           0       -0.046969    0.581006   -0.315085
      2          1           0       -0.130532    1.275879   -1.048511
      3          6           0        1.315302    0.599680    0.218910
      4          1           0        1.477419    1.585621    0.661680
      5          1           0        1.450974   -0.138859    1.028706
      6          6           0        2.372175    0.363608   -0.857205
      7          1           0        3.374746    0.448217   -0.431252
      8          1           0        2.287804   -0.631284   -1.298725
      9          1           0        2.270681    1.098987   -1.657368
     10          6           0       -1.101464    0.801871    0.671312
     11          1           0       -1.092141   -0.029280    1.380754
     12          1           0       -0.928649    1.719067    1.262718
     13          6           0       -2.468553    0.874589    0.003301
     14          1           0       -2.675255   -0.042030   -0.551760
     15          1           0       -3.256634    1.016427    0.745586
     16          1           0       -2.520572    1.713018   -0.697487
 ---------------------------------------------------------------------
                    Distance matrix (angstroms):
                    1          2          3          4          5
     1  N    0.000000
     2  H    1.013778   0.000000
     3  C    1.463312   2.038146   0.000000
     4  H    2.070526   2.367741   1.092889   0.000000
     5  H    2.137244   2.969424   1.104362   1.763304   0.000000
     6  C    2.488657   2.670652   1.526674   2.144975   2.158180
     7  H    3.426260   3.654176   2.164939   2.467395   2.485364
     8  H    2.808623   3.090022   2.182716   3.068319   2.521844
     9  H    2.727917   2.483510   2.163903   2.498812   3.069067
    10  C    1.460725   2.031054   2.467044   2.695365   2.743655
    11  H    2.083435   2.920524   2.746134   3.118912   2.569705
    12  H    2.135885   2.484992   2.716225   2.483590   3.028079
    13  C    2.460006   2.594934   3.799950   4.063215   4.176269
    14  H    2.711471   2.908481   4.114641   4.622378   4.419617
    15  H    3.408308   3.613670   4.621002   4.768886   4.855556
    16  H    2.747070   2.454913   4.097954   4.224629   4.709816
                    6          7          8          9         10
     6  C    0.000000
     7  H    1.092585   0.000000
     8  H    1.091728   1.760476   0.000000
     9  H    1.091487   1.773646   1.767132   0.000000
    10  C    3.820288   4.623545   4.173981   4.108818   0.000000
    11  H    4.142983   4.844012   4.355003   4.670304   1.092797
    12  H    4.150516   4.796228   4.736108   4.375742   1.104932
    13  C    4.943098   5.874927   5.156147   5.026779   1.523305
    14  H    5.072907   6.071027   5.053428   5.194860   2.164461
    15  H    5.888854   6.758920   6.134733   6.027621   2.167097
    16  H    5.077931   6.035343   5.383096   4.924887   2.172019
                   11         12         13         14         15
    11  H    0.000000
    12  H    1.759937   0.000000
    13  C    2.146826   2.161152   0.000000
    14  H    2.498204   3.073179   1.091334   0.000000
    15  H    2.486357   2.486090   1.091869   1.772411   0.000000
    16  H    3.065142   2.525204   1.093971   1.767868   1.763373
                   16
    16  H    0.000000
 Stoichiometry    C4H11N
 Framework group  C1[X(C4H11N)]
 Deg. of freedom    42
 Full point group                 C1      NOp   1
 Largest Abelian subgroup         C1      NOp   1
 Largest concise Abelian subgroup C1      NOp   1
                         Standard orientation:                         
 ---------------------------------------------------------------------
 Center     Atomic      Atomic             Coordinates (Angstroms)
 Number     Number       Type             X           Y           Z
 ---------------------------------------------------------------------
      1          7           0        0.007902   -0.262688   -0.077361
      2          1           0        0.030012   -0.978706    0.639977
      3          6           0       -1.230546    0.507416    0.042924
      4          1           0       -1.213301    1.000537    1.018086
      5          1           0       -1.294613    1.306615   -0.716545
      6          6           0       -2.478302   -0.367965   -0.043936
      7          1           0       -3.376894    0.233262    0.113545
      8          1           0       -2.572361   -0.846165   -1.020843
      9          1           0       -2.446330   -1.151651    0.715115
     10          6           0        1.236044    0.524456   -0.001251
     11          1           0        1.268857    1.199609   -0.859910
     12          1           0        1.262094    1.163659    0.899647
     13          6           0        2.464753   -0.375642   -0.024877
     14          1           0        2.478338   -0.985170   -0.930028
     15          1           0        3.381193    0.216971    0.008668
     16          1           0        2.476002   -1.049736    0.836659
 ---------------------------------------------------------------------
 Rotational constants (GHZ):     17.8862508      2.0678014      1.9509689
 Standard basis: TZVP (5D, 7F)
 There are   166 symmetry adapted cartesian basis functions of A   symmetry.
 There are   161 symmetry adapted basis functions of A   symmetry.
   161 basis functions,   263 primitive gaussians,   166 cartesian basis functions
    21 alpha electrons       21 beta electrons
       nuclear repulsion energy       187.7932971125 Hartrees.
 NAtoms=   16 NActive=   16 NUniq=   16 SFac= 1.00D+00 NAtFMM=   60 NAOKFM=F Big=F
 Integral buffers will be    131072 words long.
 Raffenetti 2 integral format.
 Two-electron integral symmetry is turned on.
 One-electron integrals computed using PRISM.
 NBasis=   161 RedAO= T EigKep=  4.77D-04  NBF=   161
 NBsUse=   161 1.00D-06 EigRej= -1.00D+00 NBFU=   161
 ExpMin= 9.52D-02 ExpMax= 1.97D+04 ExpMxC= 6.73D+02 IAcc=2 IRadAn=         4 AccDes= 0.00D+00
 Harris functional with IExCor=  402 and IRadAn=       4 diagonalized for initial guess.
 HarFok:  IExCor=  402 AccDes= 0.00D+00 IRadAn=         4 IDoV= 1 UseB2=F ITyADJ=14
 ICtDFT=  3500011 ScaDFX=  1.000000  1.000000  1.000000  1.000000
 FoFCou: FMM=F IPFlag=           0 FMFlag=      100000 FMFlg1=           0
         NFxFlg=           0 DoJE=T BraDBF=F KetDBF=T FulRan=T
         wScrn=  0.000000 ICntrl=     500 IOpCl=  0 I1Cent=   200000004 NGrid=           0
         NMat0=    1 NMatS0=      1 NMatT0=    0 NMatD0=    1 NMtDS0=    0 NMtDT0=    0
 Petite list used in FoFCou.
 Keep R1 ints in memory in canonical form, NReq=87472501.
 Requested convergence on RMS density matrix=1.00D-08 within 128 cycles.
 Requested convergence on MAX density matrix=1.00D-06.
 Requested convergence on             energy=1.00D-06.
 No special actions if energy rises.
 Integral accuracy reduced to 1.0D-05 until final iterations.
 Initial convergence to 1.0D-05 achieved.  Increase integral accuracy.
 SCF Done:  E(RB3LYP) =  -213.875048758     A.U. after   12 cycles
            NFock= 12  Conv=0.61D-08     -V/T= 2.0057
 DoSCS=F DFT=T ScalE2(SS,OS)=  1.000000  1.000000
 Range of M.O.s used for correlation:     1   161
 NBasis=   161 NAE=    21 NBE=    21 NFC=     0 NFV=     0
 NROrb=    161 NOA=    21 NOB=    21 NVA=   140 NVB=   140

 **** Warning!!: The largest alpha MO coefficient is  0.13319169D+02

 Symmetrizing basis deriv contribution to polar:
 IMax=3 JMax=2 DiffMx= 0.00D+00
 G2DrvN: will do    17 centers at a time, making    1 passes.
 Calling FoFCou, ICntrl=  3107 FMM=F I1Cent=   0 AccDes= 0.00D+00.
 End of G2Drv F.D. properties file   721 does not exist.
 End of G2Drv F.D. properties file   722 does not exist.
 End of G2Drv F.D. properties file   788 does not exist.
          IDoAtm=1111111111111111
          Differentiating once with respect to electric field.
                with respect to dipole field.
          Differentiating once with respect to nuclear coordinates.
 Keep R1 ints in memory in canonical form, NReq=87374209.
          There are    51 degrees of freedom in the 1st order CPHF.  IDoFFX=6 NUNeed=     3.
     48 vectors produced by pass  0 Test12= 5.76D-15 1.96D-09 XBig12= 3.69D+01 2.03D+00.
 AX will form    48 AO Fock derivatives at one time.
     48 vectors produced by pass  1 Test12= 5.76D-15 1.96D-09 XBig12= 1.91D+00 2.64D-01.
     48 vectors produced by pass  2 Test12= 5.76D-15 1.96D-09 XBig12= 1.84D-02 2.62D-02.
     48 vectors produced by pass  3 Test12= 5.76D-15 1.96D-09 XBig12= 5.23D-05 1.12D-03.
     48 vectors produced by pass  4 Test12= 5.76D-15 1.96D-09 XBig12= 5.59D-08 3.70D-05.
     23 vectors produced by pass  5 Test12= 5.76D-15 1.96D-09 XBig12= 3.53D-11 1.23D-06.
      3 vectors produced by pass  6 Test12= 5.76D-15 1.96D-09 XBig12= 1.54D-14 2.03D-08.
      1 vectors produced by pass  7 Test12= 5.76D-15 1.96D-09 XBig12= 2.10D-17 1.98D-09.
 InvSVY:  IOpt=1 It=  1 EMax= 2.66D-15
 Solved reduced A of dimension   267 with    51 vectors.
 Isotropic polarizability for W=    0.000000       59.88 Bohr**3.
 End of Minotr F.D. properties file   721 does not exist.
 End of Minotr F.D. properties file   722 does not exist.
 End of Minotr F.D. properties file   788 does not exist.

 **********************************************************************

            Population analysis using the SCF density.

 **********************************************************************

 Orbital symmetries:
       Occupied  (A) (A) (A) (A) (A) (A) (A) (A) (A) (A) (A) (A)
                 (A) (A) (A) (A) (A) (A) (A) (A) (A)
       Virtual   (A) (A) (A) (A) (A) (A) (A) (A) (A) (A) (A) (A)
                 (A) (A) (A) (A) (A) (A) (A) (A) (A) (A) (A) (A)
                 (A) (A) (A) (A) (A) (A) (A) (A) (A) (A) (A) (A)
                 (A) (A) (A) (A) (A) (A) (A) (A) (A) (A) (A) (A)
                 (A) (A) (A) (A) (A) (A) (A) (A) (A) (A) (A) (A)
                 (A) (A) (A) (A) (A) (A) (A) (A) (A) (A) (A) (A)
                 (A) (A) (A) (A) (A) (A) (A) (A) (A) (A) (A) (A)
                 (A) (A) (A) (A) (A) (A) (A) (A) (A) (A) (A) (A)
                 (A) (A) (A) (A) (A) (A) (A) (A) (A) (A) (A) (A)
                 (A) (A) (A) (A) (A) (A) (A) (A) (A) (A) (A) (A)
                 (A) (A) (A) (A) (A) (A) (A) (A) (A) (A) (A) (A)
                 (A) (A) (A) (A) (A) (A) (A) (A)
 The electronic state is 1-A.
 Alpha  occ. eigenvalues --  -14.29470 -10.19186 -10.19079 -10.16032 -10.16009
 Alpha  occ. eigenvalues --   -0.90253  -0.76476  -0.71287  -0.61151  -0.60425
 Alpha  occ. eigenvalues --   -0.48434  -0.46725  -0.43938  -0.43413  -0.40384
 Alpha  occ. eigenvalues --   -0.37339  -0.36615  -0.35228  -0.34603  -0.34197
 Alpha  occ. eigenvalues --   -0.22055
 Alpha virt. eigenvalues --    0.03117   0.05087   0.06324   0.07816   0.10290
 Alpha virt. eigenvalues --    0.10789   0.11541   0.12328   0.12605   0.13216
 Alpha virt. eigenvalues --    0.13781   0.14493   0.18488   0.18860   0.19050
 Alpha virt. eigenvalues --    0.20185   0.22950   0.25444   0.26816   0.27773
 Alpha virt. eigenvalues --    0.30139   0.30700   0.32412   0.35148   0.38558
 Alpha virt. eigenvalues --    0.39940   0.40674   0.42153   0.42489   0.44260
 Alpha virt. eigenvalues --    0.45477   0.45886   0.46054   0.46307   0.48099
 Alpha virt. eigenvalues --    0.48457   0.50608   0.51282   0.52300   0.55602
 Alpha virt. eigenvalues --    0.57653   0.60138   0.61241   0.63286   0.70062
 Alpha virt. eigenvalues --    0.71158   1.12486   1.13929   1.17635   1.22789
 Alpha virt. eigenvalues --    1.23710   1.26980   1.27762   1.28132   1.29619
 Alpha virt. eigenvalues --    1.32424   1.33113   1.33920   1.36461   1.38447
 Alpha virt. eigenvalues --    1.40577   1.41761   1.45734   1.46191   1.52152
 Alpha virt. eigenvalues --    1.52677   1.53903   1.54373   1.55241   1.56357
 Alpha virt. eigenvalues --    1.62858   1.63105   1.65885   1.67866   1.73126
 Alpha virt. eigenvalues --    1.77688   1.78724   1.79324   1.79405   1.79587
 Alpha virt. eigenvalues --    1.82735   1.83551   1.85616   1.88155   1.89189
 Alpha virt. eigenvalues --    1.91753   1.94144   1.99763   2.05758   2.06800
 Alpha virt. eigenvalues --    2.13709   2.15280   2.17539   2.18357   2.25872
 Alpha virt. eigenvalues --    2.27287   2.27938   2.29017   2.32957   2.33846
 Alpha virt. eigenvalues --    2.36466   2.43034   2.44161   2.47619   2.51727
 Alpha virt. eigenvalues --    2.52189   2.52537   2.57105   2.60289   2.61576
 Alpha virt. eigenvalues --    2.62570   2.64123   2.66566   2.67475   2.69076
 Alpha virt. eigenvalues --    2.73583   2.76411   2.86671   2.90457   2.92672
 Alpha virt. eigenvalues --    2.94098   2.97431   3.12665   3.18202   3.27949
 Alpha virt. eigenvalues --    3.30168   3.31589   3.33483   3.34186   3.37143
 Alpha virt. eigenvalues --    3.40107   3.42926   3.44248   3.79657   3.87816
 Alpha virt. eigenvalues --   21.92336  21.97354  22.02974  22.03885  31.85174
          Condensed to atoms (all electrons):
               1          2          3          4          5          6
     1  N    6.655108   0.360908   0.290235  -0.078132  -0.041108  -0.059119
     2  H    0.360908   0.553280  -0.041152  -0.012372   0.011218  -0.010237
     3  C    0.290235  -0.041152   5.012617   0.411481   0.391663   0.277739
     4  H   -0.078132  -0.012372   0.411481   0.712071  -0.069952  -0.058166
     5  H   -0.041108   0.011218   0.391663  -0.069952   0.634257  -0.022894
     6  C   -0.059119  -0.010237   0.277739  -0.058166  -0.022894   4.991268
     7  H    0.008548  -0.000142  -0.041911   0.006035  -0.005789   0.394027
     8  H    0.008669  -0.001641  -0.043311   0.012891  -0.012096   0.401452
     9  H   -0.008471   0.008078  -0.037451  -0.013617   0.009997   0.407098
    10  C    0.319280  -0.046854  -0.066432  -0.019903  -0.005572   0.012997
    11  H   -0.051756   0.011358  -0.008662  -0.005562   0.011119  -0.000200
    12  H   -0.072109  -0.010190  -0.013172   0.029719  -0.007567   0.000689
    13  C   -0.072779  -0.006317   0.011951  -0.000028   0.000843  -0.001122
    14  H    0.012235  -0.002445  -0.000841   0.000466  -0.000335   0.000074
    15  H    0.008830  -0.000014  -0.000843   0.000271  -0.000100   0.000066
    16  H   -0.008869   0.008510   0.000065  -0.000416   0.000134  -0.000138
               7          8          9         10         11         12
     1  N    0.008548   0.008669  -0.008471   0.319280  -0.051756  -0.072109
     2  H   -0.000142  -0.001641   0.008078  -0.046854   0.011358  -0.010190
     3  C   -0.041911  -0.043311  -0.037451  -0.066432  -0.008662  -0.013172
     4  H    0.006035   0.012891  -0.013617  -0.019903  -0.005562   0.029719
     5  H   -0.005789  -0.012096   0.009997  -0.005572   0.011119  -0.007567
     6  C    0.394027   0.401452   0.407098   0.012997  -0.000200   0.000689
     7  H    0.584153  -0.024825  -0.031481  -0.000850  -0.000105   0.000298
     8  H   -0.024825   0.573849  -0.034160  -0.000783  -0.000255   0.000370
     9  H   -0.031481  -0.034160   0.600594  -0.000074   0.000122  -0.000341
    10  C   -0.000850  -0.000783  -0.000074   4.985227   0.405579   0.388900
    11  H   -0.000105  -0.000255   0.000122   0.405579   0.629471  -0.073843
    12  H    0.000298   0.000370  -0.000341   0.388900  -0.073843   0.734874
    13  C    0.000060  -0.000068  -0.000001   0.282969  -0.019413  -0.058008
    14  H    0.000009   0.000081  -0.000024  -0.044842  -0.012862   0.013875
    15  H    0.000000   0.000006  -0.000004  -0.039316  -0.005895   0.006177
    16  H   -0.000006  -0.000013   0.000012  -0.040440   0.010142  -0.014755
              13         14         15         16
     1  N   -0.072779   0.012235   0.008830  -0.008869
     2  H   -0.006317  -0.002445  -0.000014   0.008510
     3  C    0.011951  -0.000841  -0.000843   0.000065
     4  H   -0.000028   0.000466   0.000271  -0.000416
     5  H    0.000843  -0.000335  -0.000100   0.000134
     6  C   -0.001122   0.000074   0.000066  -0.000138
     7  H    0.000060   0.000009   0.000000  -0.000006
     8  H   -0.000068   0.000081   0.000006  -0.000013
     9  H   -0.000001  -0.000024  -0.000004   0.000012
    10  C    0.282969  -0.044842  -0.039316  -0.040440
    11  H   -0.019413  -0.012862  -0.005895   0.010142
    12  H   -0.058008   0.013875   0.006177  -0.014755
    13  C    5.007548   0.398912   0.391117   0.411887
    14  H    0.398912   0.572540  -0.021624  -0.037011
    15  H    0.391117  -0.021624   0.579057  -0.031633
    16  H    0.411887  -0.037011  -0.031633   0.600610
 Mulliken charges:
               1
     1  N   -0.271471
     2  H    0.178014
     3  C   -0.141974
     4  H    0.085214
     5  H    0.106182
     6  C   -0.333533
     7  H    0.111980
     8  H    0.119833
     9  H    0.099725
    10  C   -0.129885
    11  H    0.110764
    12  H    0.075081
    13  C   -0.347551
    14  H    0.121793
    15  H    0.113905
    16  H    0.101922
 Sum of Mulliken charges =   0.00000
 Mulliken charges with hydrogens summed into heavy atoms:
               1
     1  N   -0.093457
     3  C    0.049423
     6  C   -0.001995
    10  C    0.055960
    13  C   -0.009931
 APT charges:
               1
     1  N   -0.586134
     2  H    0.106969
     3  C    0.415805
     4  H   -0.120752
     5  H   -0.046133
     6  C    0.058746
     7  H   -0.025052
     8  H   -0.015223
     9  H   -0.026168
    10  C    0.419255
    11  H   -0.050638
    12  H   -0.126508
    13  C    0.059017
    14  H   -0.010202
    15  H   -0.023987
    16  H   -0.028994
 Sum of APT charges =   0.00000
 APT charges with hydrogens summed into heavy atoms:
               1
     1  N   -0.479165
     3  C    0.248919
     6  C   -0.007697
    10  C    0.242109
    13  C   -0.004166
 Electronic spatial extent (au):  <R**2>=            677.7785
 Charge=              0.0000 electrons
 Dipole moment (field-independent basis, Debye):
    X=             -0.0119    Y=              0.3278    Z=              0.8591  Tot=              0.9196
 Quadrupole moment (field-independent basis, Debye-Ang):
   XX=            -33.5534   YY=            -34.7160   ZZ=            -34.8060
   XY=             -0.0699   XZ=              0.0589   YZ=             -1.9088
 Traceless Quadrupole moment (field-independent basis, Debye-Ang):
   XX=              0.8051   YY=             -0.3576   ZZ=             -0.4475
   XY=             -0.0699   XZ=              0.0589   YZ=             -1.9088
 Octapole moment (field-independent basis, Debye-Ang**2):
  XXX=             -0.1032  YYY=             -1.4693  ZZZ=              0.0769  XYY=             -0.0982
  XXY=              1.9615  XXZ=             -1.4893  XZZ=              0.0356  YZZ=             -0.7384
  YYZ=              0.5169  XYZ=              0.0591
 Hexadecapole moment (field-independent basis, Debye-Ang**3):
 XXXX=           -773.8432 YYYY=           -120.3231 ZZZZ=            -69.7360 XXXY=             -0.1346
 XXXZ=              0.2123 YYYX=             -0.2807 YYYZ=             -4.6086 ZZZX=              0.4361
 ZZZY=             -2.1551 XXYY=           -149.0467 XXZZ=           -141.4465 YYZZ=            -29.3353
 XXYZ=             -0.5917 YYXZ=             -0.0632 ZZXY=             -0.0487
 N-N= 1.877932971125D+02 E-N=-8.712798476624D+02  KE= 2.126724640328D+02
  Exact polarizability:  70.623   0.184  56.068   0.379   0.435  52.959
 Approx polarizability:  78.617   0.255  77.661   0.657  -0.153  75.673
 Calling FoFJK, ICntrl=    100127 FMM=F ISym2X=0 I1Cent= 0 IOpClX= 0 NMat=1 NMatS=1 NMatT=0.
 ***** Axes restored to original set *****
 -------------------------------------------------------------------
 Center     Atomic                   Forces (Hartrees/Bohr)
 Number     Number              X              Y              Z
 -------------------------------------------------------------------
      1        7          -0.001210387   -0.012441551    0.000075618
      2        1           0.001451517    0.000210723   -0.000946802
      3        6          -0.000441958    0.004674813    0.000558235
      4        1           0.007908655    0.003875981    0.006934083
      5        1          -0.007177528    0.002639667   -0.005983693
      6        6          -0.002416743   -0.002231471    0.000967295
      7        1          -0.000405456    0.001745257   -0.000377687
      8        1          -0.002178903    0.000166688    0.000043897
      9        1           0.001691628    0.000612849   -0.001130643
     10        6           0.001919980    0.001142408   -0.000827036
     11        1           0.001200269   -0.000907492    0.000397731
     12        1          -0.000394060    0.000177816    0.000397320
     13        6           0.000021616    0.000240925   -0.000201066
     14        1           0.000087832    0.000021165    0.000022952
     15        1           0.000032423    0.000060313    0.000040765
     16        1          -0.000088888    0.000011907    0.000029033
 -------------------------------------------------------------------
 Cartesian Forces:  Max     0.012441551 RMS     0.003008943
 FormGI is forming the generalized inverse of G from B-inverse, IUseBI=4.

 GradGradGradGradGradGradGradGradGradGradGradGradGradGradGradGradGradGrad
 Berny optimization.
 Internal  Forces:  Max     0.009151819 RMS     0.002487063
 Search for a local minimum.
 Step number   1 out of a maximum of   82
 All quantities printed in internal units (Hartrees-Bohrs-Radians)
 Mixed Optimization -- RFO/linear search
 Second derivative matrix not updated -- analytic derivatives used.
 ITU=  0
     Eigenvalues ---    0.00221   0.00243   0.00274   0.00358   0.01798
     Eigenvalues ---    0.04149   0.04421   0.04469   0.04491   0.04517
     Eigenvalues ---    0.04618   0.04939   0.05084   0.08194   0.08457
     Eigenvalues ---    0.10103   0.11605   0.12196   0.12278   0.12676
     Eigenvalues ---    0.13267   0.13448   0.16038   0.16135   0.18389
     Eigenvalues ---    0.22356   0.24161   0.28730   0.29305   0.29587
     Eigenvalues ---    0.30822   0.31032   0.32497   0.33039   0.33392
     Eigenvalues ---    0.33416   0.33585   0.34216   0.34324   0.34822
     Eigenvalues ---    0.35944   0.44026
 RFO step:  Lambda=-3.55004161D-03 EMin= 2.20746184D-03
 Linear search not attempted -- first point.
 Iteration  1 RMS(Cart)=  0.04811694 RMS(Int)=  0.00173023
 Iteration  2 RMS(Cart)=  0.00175690 RMS(Int)=  0.00049187
 Iteration  3 RMS(Cart)=  0.00000206 RMS(Int)=  0.00049187
 Iteration  4 RMS(Cart)=  0.00000000 RMS(Int)=  0.00049187
 Variable       Old X    -DE/DX   Delta X   Delta X   Delta X     New X
                                 (Linear)    (Quad)   (Total)
    R1        1.91576   0.00071   0.00000   0.00322   0.00322   1.91899
    R2        2.76526  -0.00229   0.00000  -0.01045  -0.01045   2.75481
    R3        2.76037  -0.00199   0.00000  -0.00255  -0.00255   2.75782
    R4        2.06526   0.00748   0.00000   0.02151   0.02151   2.08677
    R5        2.08694  -0.00704   0.00000  -0.01925  -0.01925   2.06769
    R6        2.88500  -0.00199   0.00000  -0.00674  -0.00674   2.87825
    R7        2.06469  -0.00038   0.00000  -0.00104  -0.00104   2.06364
    R8        2.06307   0.00000   0.00000  -0.00096  -0.00096   2.06210
    R9        2.06261   0.00108   0.00000   0.00418   0.00418   2.06679
   R10        2.06509   0.00095   0.00000   0.00341   0.00341   2.06849
   R11        2.08802   0.00030   0.00000  -0.00034  -0.00034   2.08768
   R12        2.87863   0.00002   0.00000  -0.00016  -0.00016   2.87847
   R13        2.06232  -0.00004   0.00000  -0.00002  -0.00002   2.06230
   R14        2.06333   0.00001   0.00000   0.00006   0.00006   2.06339
   R15        2.06731  -0.00001   0.00000  -0.00024  -0.00024   2.06707
    A1        1.90921   0.00019   0.00000   0.00295   0.00297   1.91219
    A2        1.90222   0.00214   0.00000   0.00779   0.00779   1.91001
    A3        2.00832  -0.00405   0.00000  -0.01630  -0.01629   1.99203
    A4        1.87282   0.00915   0.00000   0.08304   0.08351   1.95633
    A5        1.95349  -0.00560   0.00000  -0.07206  -0.07237   1.88112
    A6        1.96630  -0.00537   0.00000  -0.02381  -0.02516   1.94114
    A7        1.86294  -0.00156   0.00000  -0.00596  -0.00462   1.85832
    A8        1.89904  -0.00173   0.00000   0.01322   0.01262   1.91166
    A9        1.90541   0.00536   0.00000   0.00983   0.00747   1.91289
   A10        1.92673  -0.00013   0.00000   0.00783   0.00786   1.93458
   A11        1.95248  -0.00257   0.00000  -0.02035  -0.02029   1.93219
   A12        1.92643   0.00245   0.00000   0.01195   0.01197   1.93840
   A13        1.87460   0.00188   0.00000   0.01974   0.01980   1.89440
   A14        1.89542  -0.00154   0.00000  -0.01785  -0.01787   1.87755
   A15        1.88632  -0.00010   0.00000  -0.00154  -0.00150   1.88482
   A16        1.89360  -0.00108   0.00000  -0.01237  -0.01237   1.88124
   A17        1.95416   0.00051   0.00000   0.00486   0.00485   1.95901
   A18        1.93795   0.00021   0.00000   0.00406   0.00406   1.94200
   A19        1.85723  -0.00004   0.00000  -0.00150  -0.00149   1.85574
   A20        1.90567   0.00087   0.00000   0.00594   0.00596   1.91163
   A21        1.91289  -0.00046   0.00000  -0.00126  -0.00128   1.91161
   A22        1.93149  -0.00011   0.00000   0.00019   0.00019   1.93168
   A23        1.93460  -0.00008   0.00000  -0.00010  -0.00010   1.93450
   A24        1.93925   0.00014   0.00000  -0.00025  -0.00025   1.93900
   A25        1.89459   0.00009   0.00000   0.00025   0.00025   1.89485
   A26        1.88483   0.00001   0.00000   0.00023   0.00023   1.88506
   A27        1.87718  -0.00005   0.00000  -0.00031  -0.00031   1.87687
    D1        1.09591   0.00038   0.00000   0.05902   0.05987   1.15578
    D2        3.13414   0.00096   0.00000   0.06251   0.06093  -3.08811
    D3       -0.99386  -0.00031   0.00000   0.00218   0.00293  -0.99093
    D4       -1.05183   0.00033   0.00000   0.05822   0.05905  -0.99277
    D5        0.98640   0.00092   0.00000   0.06171   0.06012   1.04652
    D6        3.14159  -0.00035   0.00000   0.00138   0.00211  -3.13948
    D7        3.00565   0.00088   0.00000   0.02491   0.02491   3.03056
    D8       -1.23307   0.00045   0.00000   0.01818   0.01818  -1.21489
    D9        0.91131   0.00037   0.00000   0.02300   0.02302   0.93433
   D10       -1.12608  -0.00010   0.00000   0.02320   0.02318  -1.10289
   D11        0.91839  -0.00053   0.00000   0.01647   0.01645   0.93484
   D12        3.06277  -0.00061   0.00000   0.02129   0.02129   3.08406
   D13        3.07873   0.00444   0.00000   0.07126   0.07129  -3.13316
   D14       -1.11799   0.00503   0.00000   0.08809   0.08810  -1.02989
   D15        0.98309   0.00486   0.00000   0.08076   0.08076   1.06384
   D16        1.00420  -0.00252   0.00000  -0.02641  -0.02632   0.97788
   D17        3.09066  -0.00192   0.00000  -0.00958  -0.00951   3.08115
   D18       -1.09145  -0.00209   0.00000  -0.01691  -0.01685  -1.10830
   D19       -1.02279  -0.00264   0.00000  -0.03203  -0.03210  -1.05488
   D20        1.06368  -0.00205   0.00000  -0.01520  -0.01530   1.04839
   D21       -3.11843  -0.00222   0.00000  -0.02253  -0.02263  -3.14106
   D22        1.01549  -0.00036   0.00000  -0.00654  -0.00654   1.00895
   D23        3.11855  -0.00037   0.00000  -0.00616  -0.00616   3.11239
   D24       -1.07835  -0.00039   0.00000  -0.00679  -0.00679  -1.08514
   D25       -1.07165   0.00029   0.00000   0.00245   0.00245  -1.06920
   D26        1.03141   0.00028   0.00000   0.00283   0.00283   1.03424
   D27        3.11769   0.00026   0.00000   0.00220   0.00220   3.11989
   D28       -3.09967   0.00011   0.00000   0.00158   0.00158  -3.09809
   D29       -0.99662   0.00010   0.00000   0.00196   0.00196  -0.99466
   D30        1.08967   0.00008   0.00000   0.00133   0.00133   1.09099
         Item               Value     Threshold  Converged?
 Maximum Force            0.009152     0.000015     NO 
 RMS     Force            0.002487     0.000010     NO 
 Maximum Displacement     0.172729     0.000060     NO 
 RMS     Displacement     0.048278     0.000040     NO 
 Predicted change in Energy=-1.873557D-03
 GradGradGradGradGradGradGradGradGradGradGradGradGradGradGradGradGradGrad

                          Input orientation:                          
 ---------------------------------------------------------------------
 Center     Atomic      Atomic             Coordinates (Angstroms)
 Number     Number       Type             X           Y           Z
 ---------------------------------------------------------------------
      1          7           0       -0.036215    0.587491   -0.322333
      2          1           0       -0.115095    1.268697   -1.071296
      3          6           0        1.312960    0.622027    0.228725
      4          1           0        1.529603    1.578159    0.736948
      5          1           0        1.381856   -0.158105    0.992838
      6          6           0        2.356498    0.372067   -0.852201
      7          1           0        3.364016    0.390809   -0.431378
      8          1           0        2.196400   -0.597720   -1.326161
      9          1           0        2.308928    1.139959   -1.629538
     10          6           0       -1.088606    0.822830    0.660959
     11          1           0       -1.050750    0.009401    1.392430
     12          1           0       -0.929914    1.757754    1.227710
     13          6           0       -2.462331    0.852901    0.003553
     14          1           0       -2.656757   -0.081441   -0.525779
     15          1           0       -3.246542    0.999862    0.748981
     16          1           0       -2.535720    1.671825   -0.717887
 ---------------------------------------------------------------------
                    Distance matrix (angstroms):
                    1          2          3          4          5
     1  N    0.000000
     2  H    1.015484   0.000000
     3  C    1.457783   2.036560   0.000000
     4  H    2.134311   2.463848   1.104271   0.000000
     5  H    2.072804   2.921862   1.094177   1.761228   0.000000
     6  C    2.460130   2.638318   1.523106   2.159585   2.152946
     7  H    3.407660   3.644777   2.167032   2.477873   2.501731
     8  H    2.719736   2.981859   2.164698   3.071724   2.496898
     9  H    2.741113   2.490802   2.171024   2.529747   3.069412
    10  C    1.459375   2.036475   2.448401   2.726044   2.678724
    11  H    2.074580   2.920825   2.704929   3.090126   2.470891
    12  H    2.137954   2.487677   2.705241   2.514424   3.011637
    13  C    2.462252   2.614900   3.789040   4.123033   4.096168
    14  H    2.712213   2.929250   4.101560   4.677003   4.315376
    15  H    3.409394   3.632030   4.604615   4.811043   4.777281
    16  H    2.753137   2.479281   4.100059   4.318815   4.650013
                    6          7          8          9         10
     6  C    0.000000
     7  H    1.092033   0.000000
     8  H    1.091218   1.772330   0.000000
     9  H    1.093698   1.763526   1.767549   0.000000
    10  C    3.789668   4.604964   4.093638   4.109767   0.000000
    11  H    4.096245   4.791858   4.278237   4.658099   1.094599
    12  H    4.128760   4.801973   4.673794   4.362984   1.104750
    13  C    4.917786   5.860803   5.057293   5.051168   1.523222
    14  H    5.044298   6.040003   4.945734   5.231455   2.164520
    15  H    5.861055   6.742675   6.040207   6.044851   2.166973
    16  H    5.063714   6.044003   5.283350   4.958286   2.171669
                   11         12         13         14         15
    11  H    0.000000
    12  H    1.760247   0.000000
    13  C    2.152448   2.160005   0.000000
    14  H    2.503405   3.072352   1.091324   0.000000
    15  H    2.493299   2.484018   1.091901   1.772591   0.000000
    16  H    3.069564   2.524152   1.093845   1.767907   1.763095
                   16
    16  H    0.000000
 Stoichiometry    C4H11N
 Framework group  C1[X(C4H11N)]
 Deg. of freedom    42
 Full point group                 C1      NOp   1
 Largest Abelian subgroup         C1      NOp   1
 Largest concise Abelian subgroup C1      NOp   1
                         Standard orientation:                         
 ---------------------------------------------------------------------
 Center     Atomic      Atomic             Coordinates (Angstroms)
 Number     Number       Type             X           Y           Z
 ---------------------------------------------------------------------
      1          7           0       -0.001243   -0.269889   -0.065693
      2          1           0        0.010020   -0.977934    0.662148
      3          6           0       -1.224090    0.516930    0.037704
      4          1           0       -1.256982    1.113131    0.966615
      5          1           0       -1.232312    1.232028   -0.790421
      6          6           0       -2.459183   -0.370829   -0.041543
      7          1           0       -3.371408    0.225453    0.027953
      8          1           0       -2.477026   -0.924008   -0.981985
      9          1           0       -2.475331   -1.095798    0.777195
     10          6           0        1.224102    0.519539    0.005788
     11          1           0        1.237444    1.194959   -0.855478
     12          1           0        1.256206    1.161434    0.904350
     13          6           0        2.458583   -0.372184   -0.027277
     14          1           0        2.468085   -0.983766   -0.931083
     15          1           0        3.371195    0.226822   -0.003212
     16          1           0        2.482337   -1.043842    0.835745
 ---------------------------------------------------------------------
 Rotational constants (GHZ):     17.7934598      2.0903501      1.9701370
 Standard basis: TZVP (5D, 7F)
 There are   166 symmetry adapted cartesian basis functions of A   symmetry.
 There are   161 symmetry adapted basis functions of A   symmetry.
   161 basis functions,   263 primitive gaussians,   166 cartesian basis functions
    21 alpha electrons       21 beta electrons
       nuclear repulsion energy       188.2554673448 Hartrees.
 NAtoms=   16 NActive=   16 NUniq=   16 SFac= 1.00D+00 NAtFMM=   60 NAOKFM=F Big=F
 Integral buffers will be    131072 words long.
 Raffenetti 2 integral format.
 Two-electron integral symmetry is turned on.
 One-electron integrals computed using PRISM.
 NBasis=   161 RedAO= T EigKep=  4.73D-04  NBF=   161
 NBsUse=   161 1.00D-06 EigRej= -1.00D+00 NBFU=   161
 Initial guess from the checkpoint file:  "DEA_linear_geoopt.chk"
 B after Tr=     0.000000    0.000000    0.000000
         Rot=    0.999913    0.013148    0.001199   -0.000437 Ang=   1.51 deg.
 ExpMin= 9.52D-02 ExpMax= 1.97D+04 ExpMxC= 6.73D+02 IAcc=2 IRadAn=         4 AccDes= 0.00D+00
 Harris functional with IExCor=  402 and IRadAn=       4 diagonalized for initial guess.
 HarFok:  IExCor=  402 AccDes= 0.00D+00 IRadAn=         4 IDoV= 1 UseB2=F ITyADJ=14
 ICtDFT=  3500011 ScaDFX=  1.000000  1.000000  1.000000  1.000000
 FoFCou: FMM=F IPFlag=           0 FMFlag=      100000 FMFlg1=           0
         NFxFlg=           0 DoJE=T BraDBF=F KetDBF=T FulRan=T
         wScrn=  0.000000 ICntrl=     500 IOpCl=  0 I1Cent=   200000004 NGrid=           0
         NMat0=    1 NMatS0=      1 NMatT0=    0 NMatD0=    1 NMtDS0=    0 NMtDT0=    0
 Petite list used in FoFCou.
 Keep R1 ints in memory in canonical form, NReq=87472501.
 Requested convergence on RMS density matrix=1.00D-08 within 128 cycles.
 Requested convergence on MAX density matrix=1.00D-06.
 Requested convergence on             energy=1.00D-06.
 No special actions if energy rises.
 Integral accuracy reduced to 1.0D-05 until final iterations.
 Initial convergence to 1.0D-05 achieved.  Increase integral accuracy.
 SCF Done:  E(RB3LYP) =  -213.876906215     A.U. after   11 cycles
            NFock= 11  Conv=0.47D-08     -V/T= 2.0056
 DoSCS=F DFT=T ScalE2(SS,OS)=  1.000000  1.000000
 Range of M.O.s used for correlation:     1   161
 NBasis=   161 NAE=    21 NBE=    21 NFC=     0 NFV=     0
 NROrb=    161 NOA=    21 NOB=    21 NVA=   140 NVB=   140

 **** Warning!!: The largest alpha MO coefficient is  0.11382199D+02

 Symmetrizing basis deriv contribution to polar:
 IMax=3 JMax=2 DiffMx= 0.00D+00
 G2DrvN: will do    17 centers at a time, making    1 passes.
 Calling FoFCou, ICntrl=  3107 FMM=F I1Cent=   0 AccDes= 0.00D+00.
 End of G2Drv F.D. properties file   721 does not exist.
 End of G2Drv F.D. properties file   722 does not exist.
 End of G2Drv F.D. properties file   788 does not exist.
          IDoAtm=1111111111111111
          Differentiating once with respect to electric field.
                with respect to dipole field.
          Differentiating once with respect to nuclear coordinates.
 Keep R1 ints in memory in canonical form, NReq=87374209.
          There are    51 degrees of freedom in the 1st order CPHF.  IDoFFX=6 NUNeed=     3.
     48 vectors produced by pass  0 Test12= 5.76D-15 1.96D-09 XBig12= 3.67D+01 2.06D+00.
 AX will form    48 AO Fock derivatives at one time.
     48 vectors produced by pass  1 Test12= 5.76D-15 1.96D-09 XBig12= 1.91D+00 2.80D-01.
     48 vectors produced by pass  2 Test12= 5.76D-15 1.96D-09 XBig12= 1.84D-02 2.65D-02.
     48 vectors produced by pass  3 Test12= 5.76D-15 1.96D-09 XBig12= 5.22D-05 1.16D-03.
     48 vectors produced by pass  4 Test12= 5.76D-15 1.96D-09 XBig12= 5.75D-08 3.85D-05.
     22 vectors produced by pass  5 Test12= 5.76D-15 1.96D-09 XBig12= 3.59D-11 1.23D-06.
      3 vectors produced by pass  6 Test12= 5.76D-15 1.96D-09 XBig12= 1.54D-14 1.96D-08.
 InvSVY:  IOpt=1 It=  1 EMax= 7.99D-15
 Solved reduced A of dimension   265 with    51 vectors.
 Isotropic polarizability for W=    0.000000       59.83 Bohr**3.
 End of Minotr F.D. properties file   721 does not exist.
 End of Minotr F.D. properties file   722 does not exist.
 End of Minotr F.D. properties file   788 does not exist.
 Calling FoFJK, ICntrl=    100127 FMM=F ISym2X=0 I1Cent= 0 IOpClX= 0 NMat=1 NMatS=1 NMatT=0.
 ***** Axes restored to original set *****
 -------------------------------------------------------------------
 Center     Atomic                   Forces (Hartrees/Bohr)
 Number     Number              X              Y              Z
 -------------------------------------------------------------------
      1        7          -0.001163082   -0.000492483   -0.000053346
      2        1           0.000147065    0.000002629   -0.000094356
      3        6           0.000402293    0.000494569   -0.000518118
      4        1           0.000322978   -0.000077065    0.000541192
      5        1           0.000054921   -0.000070366    0.000148241
      6        6           0.000324779   -0.000196712    0.000086124
      7        1           0.000026505    0.000043449   -0.000013192
      8        1          -0.000117129    0.000062506   -0.000087293
      9        1           0.000082161    0.000070971   -0.000005173
     10        6          -0.000103183    0.000215204   -0.000046772
     11        1           0.000087296    0.000002410    0.000051371
     12        1          -0.000057859    0.000002080   -0.000024240
     13        6           0.000001365   -0.000084734    0.000024345
     14        1           0.000006937    0.000011465   -0.000013687
     15        1          -0.000000224   -0.000003463    0.000001721
     16        1          -0.000014822    0.000019543    0.000003184
 -------------------------------------------------------------------
 Cartesian Forces:  Max     0.001163082 RMS     0.000250424
 FormGI is forming the generalized inverse of G from B-inverse, IUseBI=4.

 GradGradGradGradGradGradGradGradGradGradGradGradGradGradGradGradGradGrad
 Berny optimization.
 Using GEDIIS/GDIIS optimizer.
 Internal  Forces:  Max     0.001084137 RMS     0.000166575
 Search for a local minimum.
 Step number   2 out of a maximum of   82
 All quantities printed in internal units (Hartrees-Bohrs-Radians)
 Mixed Optimization -- En-DIIS/RFO-DIIS
 Second derivative matrix not updated -- analytic derivatives used.
 DE= -1.86D-03 DEPred=-1.87D-03 R= 9.91D-01
 TightC=F SS=  1.41D+00  RLast= 2.36D-01 DXNew= 5.0454D-01 7.0696D-01
 Trust test= 9.91D-01 RLast= 2.36D-01 DXMaxT set to 5.05D-01
 ITU=  1  0
 Use linear search instead of GDIIS.
     Eigenvalues ---    0.00238   0.00252   0.00346   0.00369   0.01958
     Eigenvalues ---    0.04407   0.04413   0.04482   0.04485   0.04558
     Eigenvalues ---    0.04652   0.04902   0.04960   0.08178   0.08399
     Eigenvalues ---    0.10210   0.11632   0.12215   0.12286   0.12626
     Eigenvalues ---    0.13351   0.13454   0.16044   0.16135   0.19075
     Eigenvalues ---    0.22597   0.24369   0.29169   0.29225   0.29677
     Eigenvalues ---    0.30189   0.31895   0.32693   0.33048   0.33081
     Eigenvalues ---    0.33574   0.33579   0.34226   0.34320   0.34944
     Eigenvalues ---    0.36666   0.43536
 RFO step:  Lambda=-4.41853037D-05 EMin= 2.37732957D-03
 Quintic linear search produced a step of  0.03503.
 Iteration  1 RMS(Cart)=  0.02549216 RMS(Int)=  0.00032370
 Iteration  2 RMS(Cart)=  0.00041728 RMS(Int)=  0.00001763
 Iteration  3 RMS(Cart)=  0.00000008 RMS(Int)=  0.00001763
 Variable       Old X    -DE/DX   Delta X   Delta X   Delta X     New X
                                 (Linear)    (Quad)   (Total)
    R1        1.91899   0.00006   0.00011   0.00015   0.00026   1.91925
    R2        2.75481   0.00108  -0.00037   0.00319   0.00282   2.75763
    R3        2.75782   0.00008  -0.00009   0.00006  -0.00003   2.75779
    R4        2.08677   0.00025   0.00075   0.00000   0.00075   2.08752
    R5        2.06769   0.00015  -0.00067   0.00148   0.00081   2.06850
    R6        2.87825   0.00023  -0.00024   0.00048   0.00025   2.87850
    R7        2.06364   0.00002  -0.00004  -0.00011  -0.00015   2.06350
    R8        2.06210   0.00000  -0.00003   0.00011   0.00008   2.06218
    R9        2.06679   0.00005   0.00015   0.00011   0.00026   2.06705
   R10        2.06849   0.00003   0.00012  -0.00009   0.00003   2.06852
   R11        2.08768  -0.00002  -0.00001  -0.00012  -0.00013   2.08754
   R12        2.87847   0.00000  -0.00001   0.00006   0.00005   2.87852
   R13        2.06230   0.00000   0.00000  -0.00010  -0.00010   2.06220
   R14        2.06339   0.00000   0.00000   0.00010   0.00010   2.06349
   R15        2.06707   0.00001  -0.00001  -0.00001  -0.00002   2.06705
    A1        1.91219  -0.00005   0.00010  -0.00139  -0.00128   1.91091
    A2        1.91001  -0.00003   0.00027   0.00054   0.00081   1.91082
    A3        1.99203   0.00015  -0.00057   0.00067   0.00010   1.99212
    A4        1.95633   0.00027   0.00293   0.00029   0.00323   1.95956
    A5        1.88112  -0.00020  -0.00254   0.00146  -0.00109   1.88003
    A6        1.94114   0.00022  -0.00088   0.00203   0.00110   1.94224
    A7        1.85832  -0.00014  -0.00016  -0.00282  -0.00294   1.85539
    A8        1.91166  -0.00016   0.00044   0.00003   0.00044   1.91210
    A9        1.91289  -0.00002   0.00026  -0.00122  -0.00104   1.91184
   A10        1.93458   0.00003   0.00028  -0.00046  -0.00018   1.93440
   A11        1.93219  -0.00005  -0.00071   0.00012  -0.00059   1.93160
   A12        1.93840   0.00004   0.00042   0.00020   0.00062   1.93901
   A13        1.89440   0.00007   0.00069   0.00013   0.00082   1.89523
   A14        1.87755  -0.00006  -0.00063  -0.00013  -0.00076   1.87679
   A15        1.88482  -0.00002  -0.00005   0.00016   0.00010   1.88493
   A16        1.88124  -0.00005  -0.00043  -0.00072  -0.00115   1.88008
   A17        1.95901   0.00003   0.00017   0.00038   0.00055   1.95957
   A18        1.94200   0.00002   0.00014   0.00016   0.00030   1.94230
   A19        1.85574  -0.00001  -0.00005  -0.00044  -0.00050   1.85524
   A20        1.91163   0.00001   0.00021   0.00004   0.00025   1.91188
   A21        1.91161   0.00000  -0.00004   0.00053   0.00048   1.91209
   A22        1.93168  -0.00001   0.00001  -0.00013  -0.00012   1.93156
   A23        1.93450   0.00000   0.00000  -0.00008  -0.00008   1.93441
   A24        1.93900   0.00002  -0.00001   0.00007   0.00006   1.93906
   A25        1.89485   0.00000   0.00001   0.00035   0.00036   1.89520
   A26        1.88506  -0.00001   0.00001  -0.00016  -0.00015   1.88491
   A27        1.87687  -0.00001  -0.00001  -0.00005  -0.00006   1.87681
    D1        1.15578   0.00022   0.00210   0.03195   0.03408   1.18986
    D2       -3.08811   0.00008   0.00213   0.02957   0.03165  -3.05646
    D3       -0.99093   0.00006   0.00010   0.03021   0.03034  -0.96059
    D4       -0.99277   0.00020   0.00207   0.03184   0.03394  -0.95883
    D5        1.04652   0.00006   0.00211   0.02946   0.03151   1.07803
    D6       -3.13948   0.00004   0.00007   0.03009   0.03019  -3.10929
    D7        3.03056   0.00009   0.00087   0.02419   0.02506   3.05563
    D8       -1.21489   0.00006   0.00064   0.02342   0.02406  -1.19084
    D9        0.93433   0.00009   0.00081   0.02451   0.02531   0.95964
   D10       -1.10289   0.00010   0.00081   0.02327   0.02408  -1.07882
   D11        0.93484   0.00007   0.00058   0.02249   0.02307   0.95791
   D12        3.08406   0.00010   0.00075   0.02358   0.02432   3.10839
   D13       -3.13316   0.00017   0.00250   0.01603   0.01853  -3.11463
   D14       -1.02989   0.00024   0.00309   0.01597   0.01905  -1.01084
   D15        1.06384   0.00021   0.00283   0.01637   0.01920   1.08304
   D16        0.97788  -0.00022  -0.00092   0.01423   0.01331   0.99119
   D17        3.08115  -0.00015  -0.00033   0.01417   0.01383   3.09498
   D18       -1.10830  -0.00018  -0.00059   0.01457   0.01398  -1.09432
   D19       -1.05488   0.00006  -0.00112   0.01832   0.01720  -1.03769
   D20        1.04839   0.00012  -0.00054   0.01826   0.01772   1.06610
   D21       -3.14106   0.00009  -0.00079   0.01866   0.01786  -3.12320
   D22        1.00895  -0.00003  -0.00023   0.00122   0.00100   1.00995
   D23        3.11239  -0.00003  -0.00022   0.00153   0.00131   3.11370
   D24       -1.08514  -0.00003  -0.00024   0.00146   0.00123  -1.08392
   D25       -1.06920   0.00001   0.00009   0.00199   0.00208  -1.06712
   D26        1.03424   0.00001   0.00010   0.00229   0.00239   1.03663
   D27        3.11989   0.00001   0.00008   0.00223   0.00231   3.12220
   D28       -3.09809   0.00001   0.00006   0.00220   0.00226  -3.09584
   D29       -0.99466   0.00001   0.00007   0.00251   0.00257  -0.99209
   D30        1.09099   0.00001   0.00005   0.00244   0.00249   1.09348
         Item               Value     Threshold  Converged?
 Maximum Force            0.001084     0.000015     NO 
 RMS     Force            0.000167     0.000010     NO 
 Maximum Displacement     0.066205     0.000060     NO 
 RMS     Displacement     0.025509     0.000040     NO 
 Predicted change in Energy=-2.506183D-05
 GradGradGradGradGradGradGradGradGradGradGradGradGradGradGradGradGradGrad

                          Input orientation:                          
 ---------------------------------------------------------------------
 Center     Atomic      Atomic             Coordinates (Angstroms)
 Number     Number       Type             X           Y           Z
 ---------------------------------------------------------------------
      1          7           0       -0.038291    0.584194   -0.321768
      2          1           0       -0.107475    1.260557   -1.076245
      3          6           0        1.312109    0.607754    0.230819
      4          1           0        1.530653    1.551198    0.762273
      5          1           0        1.380090   -0.188937    0.978360
      6          6           0        2.357264    0.379486   -0.853523
      7          1           0        3.362894    0.371397   -0.428072
      8          1           0        2.185950   -0.572088   -1.359495
      9          1           0        2.324059    1.172992   -1.605665
     10          6           0       -1.088836    0.839395    0.658518
     11          1           0       -1.043883    0.044435    1.409650
     12          1           0       -0.932929    1.788477    1.201888
     13          6           0       -2.464903    0.845995    0.005309
     14          1           0       -2.656744   -0.102854   -0.498429
     15          1           0       -3.247220    1.009446    0.749370
     16          1           0       -2.544403    1.645069   -0.737415
 ---------------------------------------------------------------------
                    Distance matrix (angstroms):
                    1          2          3          4          5
     1  N    0.000000
     2  H    1.015622   0.000000
     3  C    1.459277   2.037103   0.000000
     4  H    2.138183   2.479534   1.104668   0.000000
     5  H    2.073613   2.921521   1.094603   1.759952   0.000000
     6  C    2.462387   2.626943   1.523237   2.160322   2.152619
     7  H    3.409493   3.640631   2.166961   2.483135   2.494701
     8  H    2.713137   2.949342   2.164422   3.072403   2.502355
     9  H    2.752412   2.490043   2.171684   2.525800   3.069709
    10  C    1.459360   2.037118   2.449719   2.716460   2.693577
    11  H    2.073732   2.921556   2.694007   3.052486   2.473079
    12  H    2.138271   2.479912   2.716115   2.513722   3.051260
    13  C    2.462512   2.626611   3.791232   4.127321   4.099010
    14  H    2.712847   2.948140   4.097385   4.675420   4.299343
    15  H    3.409604   3.640594   4.606271   4.808506   4.785452
    16  H    2.752964   2.490235   4.109280   4.343266   4.659303
                    6          7          8          9         10
     6  C    0.000000
     7  H    1.091955   0.000000
     8  H    1.091261   1.772825   0.000000
     9  H    1.093834   1.763082   1.767761   0.000000
    10  C    3.791225   4.606256   4.097424   4.109217   0.000000
    11  H    4.099026   4.785792   4.298847   4.659270   1.094614
    12  H    4.127389   4.808220   4.675506   4.343863   1.104679
    13  C    4.920215   5.863129   5.050157   5.063232   1.523249
    14  H    5.049655   6.038700   4.940982   5.259482   2.164416
    15  H    5.863135   6.744411   6.038865   6.050792   2.166978
    16  H    5.063745   6.050957   5.261084   4.967760   2.171731
                   11         12         13         14         15
    11  H    0.000000
    12  H    1.759874   0.000000
    13  C    2.152666   2.160329   0.000000
    14  H    2.502755   3.072418   1.091270   0.000000
    15  H    2.494375   2.483467   1.091954   1.772816   0.000000
    16  H    3.069767   2.525532   1.093836   1.767758   1.763093
                   16
    16  H    0.000000
 Stoichiometry    C4H11N
 Framework group  C1[X(C4H11N)]
 Deg. of freedom    42
 Full point group                 C1      NOp   1
 Largest Abelian subgroup         C1      NOp   1
 Largest concise Abelian subgroup C1      NOp   1
                         Standard orientation:                         
 ---------------------------------------------------------------------
 Center     Atomic      Atomic             Coordinates (Angstroms)
 Number     Number       Type             X           Y           Z
 ---------------------------------------------------------------------
      1          7           0       -0.000054   -0.270039   -0.068344
      2          1           0        0.000147   -0.980310    0.657606
      3          6           0       -1.224857    0.518107    0.022072
      4          1           0       -1.256868    1.138866    0.935267
      5          1           0       -1.236492    1.213749   -0.822973
      6          6           0       -2.460102   -0.371475   -0.033282
      7          1           0       -3.372195    0.227516    0.007480
      8          1           0       -2.470702   -0.959194   -0.952697
      9          1           0       -2.483654   -1.065543    0.811814
     10          6           0        1.224862    0.518143    0.021554
     11          1           0        1.236587    1.213252   -0.823943
     12          1           0        1.256854    1.139621    0.934273
     13          6           0        2.460113   -0.371498   -0.033046
     14          1           0        2.470279   -0.960565   -0.951613
     15          1           0        3.372216    0.227566    0.006368
     16          1           0        2.484105   -1.064345    0.813041
 ---------------------------------------------------------------------
 Rotational constants (GHZ):     17.7975372      2.0884112      1.9682099
 Standard basis: TZVP (5D, 7F)
 There are   166 symmetry adapted cartesian basis functions of A   symmetry.
 There are   161 symmetry adapted basis functions of A   symmetry.
   161 basis functions,   263 primitive gaussians,   166 cartesian basis functions
    21 alpha electrons       21 beta electrons
       nuclear repulsion energy       188.1972872331 Hartrees.
 NAtoms=   16 NActive=   16 NUniq=   16 SFac= 1.00D+00 NAtFMM=   60 NAOKFM=F Big=F
 Integral buffers will be    131072 words long.
 Raffenetti 2 integral format.
 Two-electron integral symmetry is turned on.
 One-electron integrals computed using PRISM.
 NBasis=   161 RedAO= T EigKep=  4.74D-04  NBF=   161
 NBsUse=   161 1.00D-06 EigRej= -1.00D+00 NBFU=   161
 Initial guess from the checkpoint file:  "DEA_linear_geoopt.chk"
 B after Tr=     0.000000    0.000000    0.000000
         Rot=    1.000000    0.000955    0.000105   -0.000001 Ang=   0.11 deg.
 ExpMin= 9.52D-02 ExpMax= 1.97D+04 ExpMxC= 6.73D+02 IAcc=2 IRadAn=         4 AccDes= 0.00D+00
 Harris functional with IExCor=  402 and IRadAn=       4 diagonalized for initial guess.
 HarFok:  IExCor=  402 AccDes= 0.00D+00 IRadAn=         4 IDoV= 1 UseB2=F ITyADJ=14
 ICtDFT=  3500011 ScaDFX=  1.000000  1.000000  1.000000  1.000000
 FoFCou: FMM=F IPFlag=           0 FMFlag=      100000 FMFlg1=           0
         NFxFlg=           0 DoJE=T BraDBF=F KetDBF=T FulRan=T
         wScrn=  0.000000 ICntrl=     500 IOpCl=  0 I1Cent=   200000004 NGrid=           0
         NMat0=    1 NMatS0=      1 NMatT0=    0 NMatD0=    1 NMtDS0=    0 NMtDT0=    0
 Petite list used in FoFCou.
 Keep R1 ints in memory in canonical form, NReq=87472501.
 Requested convergence on RMS density matrix=1.00D-08 within 128 cycles.
 Requested convergence on MAX density matrix=1.00D-06.
 Requested convergence on             energy=1.00D-06.
 No special actions if energy rises.
 Integral accuracy reduced to 1.0D-05 until final iterations.
 Initial convergence to 1.0D-05 achieved.  Increase integral accuracy.
 SCF Done:  E(RB3LYP) =  -213.876932034     A.U. after    9 cycles
            NFock=  9  Conv=0.51D-08     -V/T= 2.0056
 DoSCS=F DFT=T ScalE2(SS,OS)=  1.000000  1.000000
 Range of M.O.s used for correlation:     1   161
 NBasis=   161 NAE=    21 NBE=    21 NFC=     0 NFV=     0
 NROrb=    161 NOA=    21 NOB=    21 NVA=   140 NVB=   140

 **** Warning!!: The largest alpha MO coefficient is  0.14637945D+02

 Symmetrizing basis deriv contribution to polar:
 IMax=3 JMax=2 DiffMx= 0.00D+00
 G2DrvN: will do    17 centers at a time, making    1 passes.
 Calling FoFCou, ICntrl=  3107 FMM=F I1Cent=   0 AccDes= 0.00D+00.
 End of G2Drv F.D. properties file   721 does not exist.
 End of G2Drv F.D. properties file   722 does not exist.
 End of G2Drv F.D. properties file   788 does not exist.
          IDoAtm=1111111111111111
          Differentiating once with respect to electric field.
                with respect to dipole field.
          Differentiating once with respect to nuclear coordinates.
 Keep R1 ints in memory in canonical form, NReq=87374209.
          There are    51 degrees of freedom in the 1st order CPHF.  IDoFFX=6 NUNeed=     3.
     48 vectors produced by pass  0 Test12= 5.76D-15 1.96D-09 XBig12= 3.67D+01 2.09D+00.
 AX will form    48 AO Fock derivatives at one time.
     48 vectors produced by pass  1 Test12= 5.76D-15 1.96D-09 XBig12= 1.91D+00 2.83D-01.
     48 vectors produced by pass  2 Test12= 5.76D-15 1.96D-09 XBig12= 1.85D-02 2.65D-02.
     48 vectors produced by pass  3 Test12= 5.76D-15 1.96D-09 XBig12= 5.21D-05 1.17D-03.
     48 vectors produced by pass  4 Test12= 5.76D-15 1.96D-09 XBig12= 5.74D-08 3.87D-05.
     22 vectors produced by pass  5 Test12= 5.76D-15 1.96D-09 XBig12= 3.58D-11 1.25D-06.
      3 vectors produced by pass  6 Test12= 5.76D-15 1.96D-09 XBig12= 1.55D-14 1.94D-08.
 InvSVY:  IOpt=1 It=  1 EMax= 4.44D-15
 Solved reduced A of dimension   265 with    51 vectors.
 Isotropic polarizability for W=    0.000000       59.85 Bohr**3.
 End of Minotr F.D. properties file   721 does not exist.
 End of Minotr F.D. properties file   722 does not exist.
 End of Minotr F.D. properties file   788 does not exist.
 Calling FoFJK, ICntrl=    100127 FMM=F ISym2X=0 I1Cent= 0 IOpClX= 0 NMat=1 NMatS=1 NMatT=0.
 ***** Axes restored to original set *****
 -------------------------------------------------------------------
 Center     Atomic                   Forces (Hartrees/Bohr)
 Number     Number              X              Y              Z
 -------------------------------------------------------------------
      1        7          -0.000053845    0.000008825   -0.000023006
      2        1           0.000005472    0.000005021    0.000004080
      3        6           0.000029225   -0.000004513   -0.000007204
      4        1           0.000008904   -0.000017349    0.000015524
      5        1           0.000006621   -0.000006806    0.000009523
      6        6           0.000017159    0.000009983    0.000006611
      7        1           0.000002983   -0.000008299   -0.000000991
      8        1          -0.000004670    0.000008382   -0.000014342
      9        1           0.000005859    0.000011013    0.000003658
     10        6          -0.000007677    0.000003319    0.000004367
     11        1          -0.000002957   -0.000012270   -0.000003805
     12        1          -0.000005359   -0.000014446    0.000003527
     13        6          -0.000000848    0.000001434    0.000005193
     14        1           0.000000206    0.000008324   -0.000009821
     15        1          -0.000001927   -0.000003558    0.000000134
     16        1           0.000000854    0.000010940    0.000006553
 -------------------------------------------------------------------
 Cartesian Forces:  Max     0.000053845 RMS     0.000012229
 FormGI is forming the generalized inverse of G from B-inverse, IUseBI=4.

 GradGradGradGradGradGradGradGradGradGradGradGradGradGradGradGradGradGrad
 Berny optimization.
 Using GEDIIS/GDIIS optimizer.
 Internal  Forces:  Max     0.000067542 RMS     0.000009560
 Search for a local minimum.
 Step number   3 out of a maximum of   82
 All quantities printed in internal units (Hartrees-Bohrs-Radians)
 Mixed Optimization -- En-DIIS/RFO-DIIS
 Swapping is turned off.
 Second derivative matrix not updated -- analytic derivatives used.
 DE= -2.58D-05 DEPred=-2.51D-05 R= 1.03D+00
 TightC=F SS=  1.41D+00  RLast= 1.11D-01 DXNew= 8.4853D-01 3.3320D-01
 Trust test= 1.03D+00 RLast= 1.11D-01 DXMaxT set to 5.05D-01
 ITU=  1  1  0
     Eigenvalues ---    0.00239   0.00247   0.00353   0.00367   0.01959
     Eigenvalues ---    0.04400   0.04406   0.04483   0.04484   0.04557
     Eigenvalues ---    0.04651   0.04892   0.04949   0.08182   0.08405
     Eigenvalues ---    0.10210   0.11628   0.12212   0.12286   0.12621
     Eigenvalues ---    0.13338   0.13441   0.16043   0.16134   0.19038
     Eigenvalues ---    0.22560   0.24339   0.29156   0.29178   0.29643
     Eigenvalues ---    0.30161   0.31830   0.32634   0.33045   0.33062
     Eigenvalues ---    0.33575   0.33581   0.34212   0.34316   0.34866
     Eigenvalues ---    0.36539   0.43495
 En-DIIS/RFO-DIIS IScMMF=        0 using points:     3    2
 RFO step:  Lambda=-1.48440185D-08.
 DidBck=F Rises=F RFO-DIIS coefs:    1.02519   -0.02519
 Iteration  1 RMS(Cart)=  0.00079532 RMS(Int)=  0.00000045
 Iteration  2 RMS(Cart)=  0.00000049 RMS(Int)=  0.00000003
 Variable       Old X    -DE/DX   Delta X   Delta X   Delta X     New X
                                 (Linear)    (Quad)   (Total)
    R1        1.91925   0.00000   0.00001  -0.00001  -0.00001   1.91924
    R2        2.75763   0.00007   0.00007   0.00012   0.00019   2.75782
    R3        2.75779   0.00002   0.00000   0.00003   0.00003   2.75782
    R4        2.08752   0.00000   0.00002  -0.00003  -0.00001   2.08751
    R5        2.06850   0.00001   0.00002   0.00000   0.00002   2.06852
    R6        2.87850   0.00001   0.00001   0.00002   0.00003   2.87853
    R7        2.06350   0.00000   0.00000   0.00001   0.00000   2.06350
    R8        2.06218   0.00000   0.00000   0.00001   0.00002   2.06220
    R9        2.06705   0.00000   0.00001   0.00000   0.00000   2.06705
   R10        2.06852   0.00000   0.00000   0.00000   0.00000   2.06852
   R11        2.08754  -0.00001   0.00000  -0.00003  -0.00003   2.08751
   R12        2.87852   0.00000   0.00000   0.00000   0.00000   2.87853
   R13        2.06220   0.00000   0.00000   0.00000   0.00000   2.06220
   R14        2.06349   0.00000   0.00000   0.00000   0.00001   2.06350
   R15        2.06705   0.00000   0.00000   0.00000   0.00000   2.06705
    A1        1.91091   0.00000  -0.00003   0.00004   0.00001   1.91092
    A2        1.91082   0.00000   0.00002   0.00008   0.00010   1.91092
    A3        1.99212   0.00001   0.00000   0.00003   0.00003   1.99215
    A4        1.95956   0.00000   0.00008  -0.00001   0.00007   1.95963
    A5        1.88003   0.00000  -0.00003   0.00003   0.00000   1.88003
    A6        1.94224   0.00002   0.00003   0.00006   0.00009   1.94233
    A7        1.85539  -0.00001  -0.00007  -0.00007  -0.00014   1.85525
    A8        1.91210  -0.00001   0.00001  -0.00004  -0.00003   1.91207
    A9        1.91184   0.00000  -0.00003   0.00003   0.00000   1.91184
   A10        1.93440   0.00000   0.00000   0.00001   0.00001   1.93441
   A11        1.93160   0.00000  -0.00001  -0.00005  -0.00006   1.93153
   A12        1.93901   0.00000   0.00002   0.00006   0.00008   1.93909
   A13        1.89523   0.00000   0.00002  -0.00004  -0.00002   1.89521
   A14        1.87679   0.00000  -0.00002   0.00003   0.00002   1.87681
   A15        1.88493   0.00000   0.00000  -0.00002  -0.00002   1.88491
   A16        1.88008   0.00000  -0.00003  -0.00003  -0.00006   1.88003
   A17        1.95957   0.00000   0.00001   0.00005   0.00007   1.95963
   A18        1.94230   0.00001   0.00001   0.00003   0.00004   1.94233
   A19        1.85524   0.00000  -0.00001   0.00002   0.00000   1.85524
   A20        1.91188   0.00000   0.00001  -0.00004  -0.00004   1.91184
   A21        1.91209   0.00000   0.00001  -0.00003  -0.00002   1.91207
   A22        1.93156   0.00000   0.00000  -0.00003  -0.00003   1.93153
   A23        1.93441   0.00000   0.00000   0.00000   0.00000   1.93441
   A24        1.93906   0.00000   0.00000   0.00003   0.00003   1.93909
   A25        1.89520   0.00000   0.00001   0.00000   0.00001   1.89521
   A26        1.88491   0.00000   0.00000   0.00000   0.00000   1.88491
   A27        1.87681   0.00000   0.00000   0.00000   0.00000   1.87681
    D1        1.18986   0.00001   0.00086  -0.00074   0.00012   1.18998
    D2       -3.05646   0.00000   0.00080  -0.00081  -0.00002  -3.05648
    D3       -0.96059   0.00000   0.00076  -0.00073   0.00004  -0.96055
    D4       -0.95883   0.00000   0.00085  -0.00089  -0.00004  -0.95887
    D5        1.07803  -0.00001   0.00079  -0.00096  -0.00017   1.07786
    D6       -3.10929   0.00000   0.00076  -0.00088  -0.00012  -3.10941
    D7        3.05563   0.00000   0.00063   0.00022   0.00085   3.05648
    D8       -1.19084   0.00000   0.00061   0.00025   0.00086  -1.18998
    D9        0.95964   0.00000   0.00064   0.00027   0.00091   0.96055
   D10       -1.07882   0.00000   0.00061   0.00035   0.00096  -1.07786
   D11        0.95791   0.00001   0.00058   0.00038   0.00097   0.95887
   D12        3.10839   0.00001   0.00061   0.00041   0.00102   3.10940
   D13       -3.11463   0.00001   0.00047   0.00077   0.00123  -3.11340
   D14       -1.01084   0.00001   0.00048   0.00070   0.00118  -1.00966
   D15        1.08304   0.00000   0.00048   0.00067   0.00116   1.08420
   D16        0.99119   0.00000   0.00034   0.00076   0.00110   0.99229
   D17        3.09498   0.00000   0.00035   0.00069   0.00104   3.09602
   D18       -1.09432  -0.00001   0.00035   0.00067   0.00102  -1.09330
   D19       -1.03769   0.00001   0.00043   0.00086   0.00129  -1.03640
   D20        1.06610   0.00001   0.00045   0.00078   0.00123   1.06733
   D21       -3.12320   0.00001   0.00045   0.00076   0.00121  -3.12199
   D22        1.00995   0.00000   0.00003  -0.00032  -0.00030   1.00965
   D23        3.11370   0.00000   0.00003  -0.00034  -0.00031   3.11339
   D24       -1.08392   0.00000   0.00003  -0.00032  -0.00029  -1.08421
   D25       -1.06712   0.00000   0.00005  -0.00028  -0.00023  -1.06735
   D26        1.03663   0.00000   0.00006  -0.00030  -0.00024   1.03639
   D27        3.12220   0.00000   0.00006  -0.00028  -0.00022   3.12198
   D28       -3.09584   0.00000   0.00006  -0.00026  -0.00020  -3.09604
   D29       -0.99209   0.00000   0.00006  -0.00028  -0.00021  -0.99230
   D30        1.09348   0.00000   0.00006  -0.00026  -0.00020   1.09329
         Item               Value     Threshold  Converged?
 Maximum Force            0.000068     0.000015     NO 
 RMS     Force            0.000010     0.000010     YES
 Maximum Displacement     0.003206     0.000060     NO 
 RMS     Displacement     0.000795     0.000040     NO 
 Predicted change in Energy=-3.890388D-08
 GradGradGradGradGradGradGradGradGradGradGradGradGradGradGradGradGradGrad

                          Input orientation:                          
 ---------------------------------------------------------------------
 Center     Atomic      Atomic             Coordinates (Angstroms)
 Number     Number       Type             X           Y           Z
 ---------------------------------------------------------------------
      1          7           0       -0.038337    0.584698   -0.321906
      2          1           0       -0.107306    1.261166   -1.076303
      3          6           0        1.312151    0.607778    0.230751
      4          1           0        1.531007    1.551012    0.762438
      5          1           0        1.379863   -0.189022    0.978219
      6          6           0        2.357372    0.379379   -0.853519
      7          1           0        3.362872    0.369700   -0.427788
      8          1           0        2.185088   -0.571538   -1.360414
      9          1           0        2.325319    1.173595   -1.604964
     10          6           0       -1.088881    0.839901    0.658405
     11          1           0       -1.043475    0.045257    1.409845
     12          1           0       -0.933357    1.789257    1.201374
     13          6           0       -2.465059    0.845597    0.005415
     14          1           0       -2.656418   -0.103471   -0.498092
     15          1           0       -3.247351    1.008744    0.749575
     16          1           0       -2.545155    1.644465   -0.737465
 ---------------------------------------------------------------------
                    Distance matrix (angstroms):
                    1          2          3          4          5
     1  N    0.000000
     2  H    1.015618   0.000000
     3  C    1.459376   2.037195   0.000000
     4  H    2.138318   2.479727   1.104663   0.000000
     5  H    2.073707   2.921605   1.094616   1.759865   0.000000
     6  C    2.462557   2.627131   1.523251   2.160306   2.152641
     7  H    3.409641   3.641073   2.166982   2.483519   2.494263
     8  H    2.712747   2.948659   2.164396   3.072384   2.502780
     9  H    2.753163   2.490946   2.171752   2.525464   3.069763
    10  C    1.459377   2.037195   2.449841   2.716673   2.693634
    11  H    2.073707   2.921605   2.693634   3.051948   2.472601
    12  H    2.138318   2.479728   2.716672   2.514461   3.051946
    13  C    2.462558   2.627130   3.791391   4.127861   4.098806
    14  H    2.712742   2.948650   4.097149   4.675551   4.298649
    15  H    3.409642   3.641075   4.606409   4.809046   4.785189
    16  H    2.753168   2.490952   4.109863   4.344369   4.659508
                    6          7          8          9         10
     6  C    0.000000
     7  H    1.091957   0.000000
     8  H    1.091269   1.772821   0.000000
     9  H    1.093836   1.763095   1.767755   0.000000
    10  C    3.791392   4.606409   4.097152   4.109860   0.000000
    11  H    4.098806   4.785190   4.298649   4.659505   1.094615
    12  H    4.127861   4.809042   4.675554   4.344369   1.104663
    13  C    4.920464   5.863354   5.049517   5.064447   1.523251
    14  H    5.049511   6.038268   4.939925   5.260586   2.164396
    15  H    5.863354   6.744598   6.038272   6.051915   2.166982
    16  H    5.064453   6.051918   5.260602   4.969487   2.171753
                   11         12         13         14         15
    11  H    0.000000
    12  H    1.759864   0.000000
    13  C    2.152642   2.160306   0.000000
    14  H    2.502784   3.072384   1.091269   0.000000
    15  H    2.494260   2.483524   1.091957   1.772821   0.000000
    16  H    3.069764   2.525461   1.093835   1.767755   1.763095
                   16
    16  H    0.000000
 Stoichiometry    C4H11N
 Framework group  C1[X(C4H11N)]
 Deg. of freedom    42
 Full point group                 C1      NOp   1
 Largest Abelian subgroup         C1      NOp   1
 Largest concise Abelian subgroup C1      NOp   1
                         Standard orientation:                         
 ---------------------------------------------------------------------
 Center     Atomic      Atomic             Coordinates (Angstroms)
 Number     Number       Type             X           Y           Z
 ---------------------------------------------------------------------
      1          7           0        0.000000   -0.270149   -0.067819
      2          1           0        0.000000   -0.980045    0.658491
      3          6           0       -1.224920    0.518085    0.021830
      4          1           0       -1.257231    1.139431    0.934609
      5          1           0       -1.236301    1.213308   -0.823580
      6          6           0       -2.460232   -0.371439   -0.033369
      7          1           0       -3.372299    0.227718    0.005559
      8          1           0       -2.469966   -0.960514   -0.951935
      9          1           0       -2.484740   -1.064277    0.812710
     10          6           0        1.224921    0.518085    0.021829
     11          1           0        1.236300    1.213308   -0.823582
     12          1           0        1.257230    1.139432    0.934607
     13          6           0        2.460232   -0.371439   -0.033369
     14          1           0        2.469960   -0.960523   -0.951929
     15          1           0        3.372299    0.227718    0.005547
     16          1           0        2.484746   -1.064269    0.812717
 ---------------------------------------------------------------------
 Rotational constants (GHZ):     17.7984628      2.0882040      1.9680429
 Standard basis: TZVP (5D, 7F)
 There are   166 symmetry adapted cartesian basis functions of A   symmetry.
 There are   161 symmetry adapted basis functions of A   symmetry.
   161 basis functions,   263 primitive gaussians,   166 cartesian basis functions
    21 alpha electrons       21 beta electrons
       nuclear repulsion energy       188.1922400634 Hartrees.
 NAtoms=   16 NActive=   16 NUniq=   16 SFac= 1.00D+00 NAtFMM=   60 NAOKFM=F Big=F
 Integral buffers will be    131072 words long.
 Raffenetti 2 integral format.
 Two-electron integral symmetry is turned on.
 One-electron integrals computed using PRISM.
 NBasis=   161 RedAO= T EigKep=  4.74D-04  NBF=   161
 NBsUse=   161 1.00D-06 EigRej= -1.00D+00 NBFU=   161
 Initial guess from the checkpoint file:  "DEA_linear_geoopt.chk"
 B after Tr=     0.000000    0.000000    0.000000
         Rot=    1.000000    0.000139    0.000005    0.000000 Ang=   0.02 deg.
 Keep R1 ints in memory in canonical form, NReq=87472501.
 Requested convergence on RMS density matrix=1.00D-08 within 128 cycles.
 Requested convergence on MAX density matrix=1.00D-06.
 Requested convergence on             energy=1.00D-06.
 No special actions if energy rises.
 SCF Done:  E(RB3LYP) =  -213.876932180     A.U. after    6 cycles
            NFock=  6  Conv=0.56D-08     -V/T= 2.0056
 DoSCS=F DFT=T ScalE2(SS,OS)=  1.000000  1.000000
 Range of M.O.s used for correlation:     1   161
 NBasis=   161 NAE=    21 NBE=    21 NFC=     0 NFV=     0
 NROrb=    161 NOA=    21 NOB=    21 NVA=   140 NVB=   140

 **** Warning!!: The largest alpha MO coefficient is  0.14682327D+02

 Symmetrizing basis deriv contribution to polar:
 IMax=3 JMax=2 DiffMx= 0.00D+00
 G2DrvN: will do    17 centers at a time, making    1 passes.
 Calling FoFCou, ICntrl=  3107 FMM=F I1Cent=   0 AccDes= 0.00D+00.
 End of G2Drv F.D. properties file   721 does not exist.
 End of G2Drv F.D. properties file   722 does not exist.
 End of G2Drv F.D. properties file   788 does not exist.
          IDoAtm=1111111111111111
          Differentiating once with respect to electric field.
                with respect to dipole field.
          Differentiating once with respect to nuclear coordinates.
 Keep R1 ints in memory in canonical form, NReq=87374209.
          There are    51 degrees of freedom in the 1st order CPHF.  IDoFFX=6 NUNeed=     3.
     48 vectors produced by pass  0 Test12= 5.76D-15 1.96D-09 XBig12= 3.67D+01 2.09D+00.
 AX will form    48 AO Fock derivatives at one time.
     48 vectors produced by pass  1 Test12= 5.76D-15 1.96D-09 XBig12= 1.91D+00 2.83D-01.
     48 vectors produced by pass  2 Test12= 5.76D-15 1.96D-09 XBig12= 1.85D-02 2.65D-02.
     48 vectors produced by pass  3 Test12= 5.76D-15 1.96D-09 XBig12= 5.20D-05 1.16D-03.
     48 vectors produced by pass  4 Test12= 5.76D-15 1.96D-09 XBig12= 5.73D-08 3.87D-05.
     22 vectors produced by pass  5 Test12= 5.76D-15 1.96D-09 XBig12= 3.58D-11 1.25D-06.
      3 vectors produced by pass  6 Test12= 5.76D-15 1.96D-09 XBig12= 1.55D-14 1.93D-08.
 InvSVY:  IOpt=1 It=  1 EMax= 2.66D-15
 Solved reduced A of dimension   265 with    51 vectors.
 Isotropic polarizability for W=    0.000000       59.85 Bohr**3.
 End of Minotr F.D. properties file   721 does not exist.
 End of Minotr F.D. properties file   722 does not exist.
 End of Minotr F.D. properties file   788 does not exist.
 Calling FoFJK, ICntrl=    100127 FMM=F ISym2X=0 I1Cent= 0 IOpClX= 0 NMat=1 NMatS=1 NMatT=0.
 ***** Axes restored to original set *****
 -------------------------------------------------------------------
 Center     Atomic                   Forces (Hartrees/Bohr)
 Number     Number              X              Y              Z
 -------------------------------------------------------------------
      1        7          -0.000000368    0.000002701   -0.000001700
      2        1           0.000001764    0.000009144    0.000004853
      3        6           0.000000277   -0.000004449    0.000000486
      4        1           0.000000611   -0.000009825    0.000008645
      5        1          -0.000002323   -0.000011184   -0.000006543
      6        6           0.000000289    0.000003499   -0.000000673
      7        1          -0.000000158   -0.000002134   -0.000000101
      8        1          -0.000000972    0.000008138   -0.000009479
      9        1           0.000002116    0.000010033    0.000006067
     10        6          -0.000000705   -0.000004410    0.000000433
     11        1          -0.000002237   -0.000011286   -0.000006584
     12        1           0.000000544   -0.000009745    0.000008674
     13        6           0.000000209    0.000003284   -0.000000600
     14        1          -0.000000817    0.000008131   -0.000009459
     15        1          -0.000000235   -0.000002017   -0.000000062
     16        1           0.000002007    0.000010121    0.000006043
 -------------------------------------------------------------------
 Cartesian Forces:  Max     0.000011286 RMS     0.000005558
 FormGI is forming the generalized inverse of G from B-inverse, IUseBI=4.

 GradGradGradGradGradGradGradGradGradGradGradGradGradGradGradGradGradGrad
 Berny optimization.
 Using GEDIIS/GDIIS optimizer.
 Internal  Forces:  Max     0.000000782 RMS     0.000000138
 Search for a local minimum.
 Step number   4 out of a maximum of   82
 All quantities printed in internal units (Hartrees-Bohrs-Radians)
 Mixed Optimization -- En-DIIS/RFO-DIIS
 Swapping is turned off.
 Second derivative matrix not updated -- analytic derivatives used.
 DE= -1.46D-07 DEPred=-3.89D-08 R= 3.76D+00
 Trust test= 3.76D+00 RLast= 4.26D-03 DXMaxT set to 5.05D-01
 ITU=  0  1  1  0
     Eigenvalues ---    0.00239   0.00247   0.00353   0.00367   0.01957
     Eigenvalues ---    0.04399   0.04405   0.04483   0.04484   0.04557
     Eigenvalues ---    0.04650   0.04891   0.04948   0.08182   0.08405
     Eigenvalues ---    0.10209   0.11628   0.12211   0.12285   0.12620
     Eigenvalues ---    0.13336   0.13440   0.16043   0.16134   0.19033
     Eigenvalues ---    0.22558   0.24336   0.29156   0.29176   0.29641
     Eigenvalues ---    0.30161   0.31827   0.32632   0.33044   0.33061
     Eigenvalues ---    0.33574   0.33580   0.34210   0.34316   0.34861
     Eigenvalues ---    0.36530   0.43497
 En-DIIS/RFO-DIIS IScMMF=        0 using points:     4    3    2
 RFO step:  Lambda=-5.09857650D-12.
 DidBck=F Rises=F RFO-DIIS coefs:    1.02865   -0.02918    0.00052
 Iteration  1 RMS(Cart)=  0.00002276 RMS(Int)=  0.00000000
 Iteration  2 RMS(Cart)=  0.00000000 RMS(Int)=  0.00000000
 Variable       Old X    -DE/DX   Delta X   Delta X   Delta X     New X
                                 (Linear)    (Quad)   (Total)
    R1        1.91924   0.00000   0.00000   0.00000   0.00000   1.91924
    R2        2.75782   0.00000   0.00000   0.00000   0.00000   2.75782
    R3        2.75782   0.00000   0.00000   0.00000   0.00000   2.75782
    R4        2.08751   0.00000   0.00000   0.00000   0.00000   2.08751
    R5        2.06852   0.00000   0.00000   0.00000   0.00000   2.06852
    R6        2.87853   0.00000   0.00000   0.00000   0.00000   2.87853
    R7        2.06350   0.00000   0.00000   0.00000   0.00000   2.06350
    R8        2.06220   0.00000   0.00000   0.00000   0.00000   2.06220
    R9        2.06705   0.00000   0.00000   0.00000   0.00000   2.06705
   R10        2.06852   0.00000   0.00000   0.00000   0.00000   2.06852
   R11        2.08751   0.00000   0.00000   0.00000   0.00000   2.08751
   R12        2.87853   0.00000   0.00000   0.00000   0.00000   2.87853
   R13        2.06220   0.00000   0.00000   0.00000   0.00000   2.06220
   R14        2.06350   0.00000   0.00000   0.00000   0.00000   2.06350
   R15        2.06705   0.00000   0.00000   0.00000   0.00000   2.06705
    A1        1.91092   0.00000   0.00000   0.00000   0.00000   1.91092
    A2        1.91092   0.00000   0.00000   0.00000   0.00000   1.91092
    A3        1.99215   0.00000   0.00000   0.00000   0.00000   1.99215
    A4        1.95963   0.00000   0.00000   0.00000   0.00000   1.95963
    A5        1.88003   0.00000   0.00000   0.00000   0.00000   1.88003
    A6        1.94233   0.00000   0.00000   0.00000   0.00000   1.94233
    A7        1.85525   0.00000   0.00000   0.00000   0.00000   1.85524
    A8        1.91207   0.00000   0.00000   0.00000   0.00000   1.91207
    A9        1.91184   0.00000   0.00000   0.00000   0.00000   1.91184
   A10        1.93441   0.00000   0.00000   0.00000   0.00000   1.93441
   A11        1.93153   0.00000   0.00000   0.00000   0.00000   1.93153
   A12        1.93909   0.00000   0.00000   0.00000   0.00000   1.93909
   A13        1.89521   0.00000   0.00000   0.00000   0.00000   1.89521
   A14        1.87681   0.00000   0.00000   0.00000   0.00000   1.87681
   A15        1.88491   0.00000   0.00000   0.00000   0.00000   1.88491
   A16        1.88003   0.00000   0.00000   0.00000   0.00000   1.88003
   A17        1.95963   0.00000   0.00000   0.00000   0.00000   1.95963
   A18        1.94233   0.00000   0.00000   0.00000   0.00000   1.94233
   A19        1.85524   0.00000   0.00000   0.00000   0.00000   1.85524
   A20        1.91184   0.00000   0.00000   0.00000   0.00000   1.91184
   A21        1.91207   0.00000   0.00000   0.00000   0.00000   1.91207
   A22        1.93153   0.00000   0.00000   0.00000   0.00000   1.93153
   A23        1.93441   0.00000   0.00000   0.00000   0.00000   1.93441
   A24        1.93909   0.00000   0.00000   0.00000   0.00000   1.93909
   A25        1.89521   0.00000   0.00000   0.00000   0.00000   1.89521
   A26        1.88491   0.00000   0.00000   0.00000   0.00000   1.88491
   A27        1.87681   0.00000   0.00000   0.00000   0.00000   1.87681
    D1        1.18998   0.00000  -0.00001  -0.00001  -0.00002   1.18996
    D2       -3.05648   0.00000  -0.00002   0.00000  -0.00002  -3.05650
    D3       -0.96055   0.00000  -0.00001  -0.00001  -0.00002  -0.96058
    D4       -0.95887   0.00000  -0.00002  -0.00001  -0.00002  -0.95890
    D5        1.07786   0.00000  -0.00002   0.00000  -0.00003   1.07783
    D6       -3.10941   0.00000  -0.00002  -0.00001  -0.00003  -3.10943
    D7        3.05648   0.00000   0.00001   0.00001   0.00002   3.05650
    D8       -1.18998   0.00000   0.00001   0.00001   0.00002  -1.18996
    D9        0.96055   0.00000   0.00001   0.00001   0.00002   0.96058
   D10       -1.07786   0.00000   0.00001   0.00001   0.00003  -1.07783
   D11        0.95887   0.00000   0.00002   0.00001   0.00003   0.95890
   D12        3.10940   0.00000   0.00002   0.00001   0.00003   3.10943
   D13       -3.11340   0.00000   0.00003   0.00000   0.00002  -3.11337
   D14       -1.00966   0.00000   0.00002   0.00000   0.00002  -1.00964
   D15        1.08420   0.00000   0.00002   0.00000   0.00002   1.08422
   D16        0.99229   0.00000   0.00002   0.00000   0.00002   0.99231
   D17        3.09602   0.00000   0.00002   0.00000   0.00002   3.09605
   D18       -1.09330   0.00000   0.00002   0.00000   0.00002  -1.09328
   D19       -1.03640   0.00000   0.00003  -0.00001   0.00002  -1.03638
   D20        1.06733   0.00000   0.00003   0.00000   0.00002   1.06736
   D21       -3.12199   0.00000   0.00003  -0.00001   0.00002  -3.12197
   D22        1.00965   0.00000  -0.00001   0.00000  -0.00001   1.00964
   D23        3.11339   0.00000  -0.00001   0.00000  -0.00001   3.11337
   D24       -1.08421   0.00000  -0.00001   0.00000  -0.00001  -1.08422
   D25       -1.06735   0.00000  -0.00001   0.00000  -0.00001  -1.06736
   D26        1.03639   0.00000  -0.00001   0.00000  -0.00001   1.03638
   D27        3.12198   0.00000  -0.00001   0.00000  -0.00001   3.12197
   D28       -3.09604   0.00000  -0.00001   0.00000  -0.00001  -3.09605
   D29       -0.99230   0.00000  -0.00001   0.00000  -0.00001  -0.99231
   D30        1.09329   0.00000  -0.00001   0.00000  -0.00001   1.09328
         Item               Value     Threshold  Converged?
 Maximum Force            0.000001     0.000015     YES
 RMS     Force            0.000000     0.000010     YES
 Maximum Displacement     0.000088     0.000060     NO 
 RMS     Displacement     0.000023     0.000040     YES
 Predicted change in Energy=-2.393991D-11
 GradGradGradGradGradGradGradGradGradGradGradGradGradGradGradGradGradGrad

                          Input orientation:                          
 ---------------------------------------------------------------------
 Center     Atomic      Atomic             Coordinates (Angstroms)
 Number     Number       Type             X           Y           Z
 ---------------------------------------------------------------------
      1          7           0       -0.038335    0.584724   -0.321913
      2          1           0       -0.107301    1.261202   -1.076299
      3          6           0        1.312152    0.607788    0.230748
      4          1           0        1.531020    1.551020    0.762433
      5          1           0        1.379850   -0.189010    0.978220
      6          6           0        2.357373    0.379368   -0.853517
      7          1           0        3.362870    0.369653   -0.427781
      8          1           0        2.185061   -0.571538   -1.360422
      9          1           0        2.325350    1.173592   -1.604956
     10          6           0       -1.088881    0.839912    0.658402
     11          1           0       -1.043460    0.045267    1.409841
     12          1           0       -0.933371    1.789269    1.201371
     13          6           0       -2.465062    0.845585    0.005417
     14          1           0       -2.656401   -0.103482   -0.498099
     15          1           0       -3.247354    1.008707    0.749581
     16          1           0       -2.545179    1.644458   -0.737455
 ---------------------------------------------------------------------
                    Distance matrix (angstroms):
                    1          2          3          4          5
     1  N    0.000000
     2  H    1.015618   0.000000
     3  C    1.459378   2.037197   0.000000
     4  H    2.138320   2.479724   1.104662   0.000000
     5  H    2.073706   2.921606   1.094616   1.759864   0.000000
     6  C    2.462559   2.627144   1.523251   2.160306   2.152642
     7  H    3.409643   3.641089   2.166982   2.483528   2.494256
     8  H    2.712736   2.948659   2.164395   3.072383   2.502786
     9  H    2.753176   2.490973   2.171754   2.525458   3.069764
    10  C    1.459378   2.037197   2.449843   2.716686   2.693621
    11  H    2.073706   2.921606   2.693621   3.051946   2.472572
    12  H    2.138320   2.479724   2.716686   2.514489   3.051946
    13  C    2.462559   2.627144   3.791394   4.127879   4.098790
    14  H    2.712736   2.948659   4.097138   4.675555   4.298622
    15  H    3.409643   3.641089   4.606411   4.809068   4.785167
    16  H    2.753176   2.490973   4.109879   4.344398   4.659506
                    6          7          8          9         10
     6  C    0.000000
     7  H    1.091957   0.000000
     8  H    1.091269   1.772821   0.000000
     9  H    1.093836   1.763096   1.767755   0.000000
    10  C    3.791394   4.606411   4.097138   4.109879   0.000000
    11  H    4.098790   4.785167   4.298622   4.659506   1.094616
    12  H    4.127879   4.809068   4.675555   4.344398   1.104662
    13  C    4.920468   5.863358   5.049495   5.064478   1.523251
    14  H    5.049495   6.038247   4.939883   5.260599   2.164395
    15  H    5.863358   6.744601   6.038248   6.051948   2.166982
    16  H    5.064478   6.051948   5.260599   4.969540   2.171754
                   11         12         13         14         15
    11  H    0.000000
    12  H    1.759864   0.000000
    13  C    2.152642   2.160306   0.000000
    14  H    2.502786   3.072383   1.091269   0.000000
    15  H    2.494256   2.483528   1.091957   1.772821   0.000000
    16  H    3.069764   2.525458   1.093836   1.767755   1.763096
                   16
    16  H    0.000000
 Stoichiometry    C4H11N
 Framework group  C1[X(C4H11N)]
 Deg. of freedom    42
 Full point group                 C1      NOp   1
 Largest Abelian subgroup         C1      NOp   1
 Largest concise Abelian subgroup C1      NOp   1
                         Standard orientation:                         
 ---------------------------------------------------------------------
 Center     Atomic      Atomic             Coordinates (Angstroms)
 Number     Number       Type             X           Y           Z
 ---------------------------------------------------------------------
      1          7           0        0.000000   -0.270153   -0.067793
      2          1           0        0.000000   -0.980030    0.658536
      3          6           0       -1.224921    0.518084    0.021830
      4          1           0       -1.257244    1.139440    0.934600
      5          1           0       -1.236286    1.213298   -0.823588
      6          6           0       -2.460234   -0.371437   -0.033379
      7          1           0       -3.372301    0.227723    0.005505
      8          1           0       -2.469941   -0.960537   -0.951930
      9          1           0       -2.484770   -1.064253    0.812718
     10          6           0        1.224921    0.518084    0.021830
     11          1           0        1.236286    1.213298   -0.823588
     12          1           0        1.257244    1.139441    0.934600
     13          6           0        2.460234   -0.371437   -0.033379
     14          1           0        2.469941   -0.960538   -0.951929
     15          1           0        3.372301    0.227723    0.005505
     16          1           0        2.484770   -1.064253    0.812718
 ---------------------------------------------------------------------
 Rotational constants (GHZ):     17.7984838      2.0882006      1.9680406
 Standard basis: TZVP (5D, 7F)
 There are   166 symmetry adapted cartesian basis functions of A   symmetry.
 There are   161 symmetry adapted basis functions of A   symmetry.
   161 basis functions,   263 primitive gaussians,   166 cartesian basis functions
    21 alpha electrons       21 beta electrons
       nuclear repulsion energy       188.1921639144 Hartrees.
 NAtoms=   16 NActive=   16 NUniq=   16 SFac= 1.00D+00 NAtFMM=   60 NAOKFM=F Big=F
 Integral buffers will be    131072 words long.
 Raffenetti 2 integral format.
 Two-electron integral symmetry is turned on.
 One-electron integrals computed using PRISM.
 NBasis=   161 RedAO= T EigKep=  4.74D-04  NBF=   161
 NBsUse=   161 1.00D-06 EigRej= -1.00D+00 NBFU=   161
 Initial guess from the checkpoint file:  "DEA_linear_geoopt.chk"
 B after Tr=     0.000000    0.000000    0.000000
         Rot=    1.000000    0.000005    0.000000    0.000000 Ang=   0.00 deg.
 Keep R1 ints in memory in canonical form, NReq=87472501.
 Requested convergence on RMS density matrix=1.00D-08 within 128 cycles.
 Requested convergence on MAX density matrix=1.00D-06.
 Requested convergence on             energy=1.00D-06.
 No special actions if energy rises.
 SCF Done:  E(RB3LYP) =  -213.876932183     A.U. after    4 cycles
            NFock=  4  Conv=0.25D-08     -V/T= 2.0056
 DoSCS=F DFT=T ScalE2(SS,OS)=  1.000000  1.000000
 Range of M.O.s used for correlation:     1   161
 NBasis=   161 NAE=    21 NBE=    21 NFC=     0 NFV=     0
 NROrb=    161 NOA=    21 NOB=    21 NVA=   140 NVB=   140

 **** Warning!!: The largest alpha MO coefficient is  0.14682370D+02

 Symmetrizing basis deriv contribution to polar:
 IMax=3 JMax=2 DiffMx= 0.00D+00
 G2DrvN: will do    17 centers at a time, making    1 passes.
 Calling FoFCou, ICntrl=  3107 FMM=F I1Cent=   0 AccDes= 0.00D+00.
 End of G2Drv F.D. properties file   721 does not exist.
 End of G2Drv F.D. properties file   722 does not exist.
 End of G2Drv F.D. properties file   788 does not exist.
          IDoAtm=1111111111111111
          Differentiating once with respect to electric field.
                with respect to dipole field.
          Differentiating once with respect to nuclear coordinates.
 Keep R1 ints in memory in canonical form, NReq=87374209.
          There are    51 degrees of freedom in the 1st order CPHF.  IDoFFX=6 NUNeed=     3.
     48 vectors produced by pass  0 Test12= 5.76D-15 1.96D-09 XBig12= 3.67D+01 2.09D+00.
 AX will form    48 AO Fock derivatives at one time.
     48 vectors produced by pass  1 Test12= 5.76D-15 1.96D-09 XBig12= 1.91D+00 2.83D-01.
     48 vectors produced by pass  2 Test12= 5.76D-15 1.96D-09 XBig12= 1.85D-02 2.65D-02.
     48 vectors produced by pass  3 Test12= 5.76D-15 1.96D-09 XBig12= 5.20D-05 1.16D-03.
     48 vectors produced by pass  4 Test12= 5.76D-15 1.96D-09 XBig12= 5.73D-08 3.87D-05.
     22 vectors produced by pass  5 Test12= 5.76D-15 1.96D-09 XBig12= 3.58D-11 1.25D-06.
      3 vectors produced by pass  6 Test12= 5.76D-15 1.96D-09 XBig12= 1.54D-14 1.93D-08.
 InvSVY:  IOpt=1 It=  1 EMax= 2.66D-15
 Solved reduced A of dimension   265 with    51 vectors.
 Isotropic polarizability for W=    0.000000       59.85 Bohr**3.
 End of Minotr F.D. properties file   721 does not exist.
 End of Minotr F.D. properties file   722 does not exist.
 End of Minotr F.D. properties file   788 does not exist.
 Calling FoFJK, ICntrl=    100127 FMM=F ISym2X=0 I1Cent= 0 IOpClX= 0 NMat=1 NMatS=1 NMatT=0.
 ***** Axes restored to original set *****
 -------------------------------------------------------------------
 Center     Atomic                   Forces (Hartrees/Bohr)
 Number     Number              X              Y              Z
 -------------------------------------------------------------------
      1        7           0.000000046    0.000002459   -0.000001085
      2        1           0.000001754    0.000009201    0.000004841
      3        6          -0.000000413   -0.000004539    0.000000256
      4        1           0.000000638   -0.000009600    0.000008784
      5        1          -0.000002284   -0.000011269   -0.000006702
      6        6           0.000000169    0.000003385   -0.000000869
      7        1          -0.000000198   -0.000001965   -0.000000080
      8        1          -0.000000890    0.000008113   -0.000009400
      9        1           0.000002064    0.000010047    0.000006136
     10        6          -0.000000393   -0.000004534    0.000000256
     11        1          -0.000002278   -0.000011266   -0.000006705
     12        1           0.000000636   -0.000009612    0.000008779
     13        6           0.000000177    0.000003393   -0.000000874
     14        1          -0.000000891    0.000008120   -0.000009397
     15        1          -0.000000203   -0.000001966   -0.000000086
     16        1           0.000002066    0.000010033    0.000006147
 -------------------------------------------------------------------
 Cartesian Forces:  Max     0.000011269 RMS     0.000005556
 FormGI is forming the generalized inverse of G from B-inverse, IUseBI=4.

 GradGradGradGradGradGradGradGradGradGradGradGradGradGradGradGradGradGrad
 Berny optimization.
 Using GEDIIS/GDIIS optimizer.
 Internal  Forces:  Max     0.000000030 RMS     0.000000006
 Search for a local minimum.
 Step number   5 out of a maximum of   82
 All quantities printed in internal units (Hartrees-Bohrs-Radians)
 Mixed Optimization -- En-DIIS/RFO-DIIS
 Swapping is turned off.
 Second derivative matrix not updated -- analytic derivatives used.
 DE= -3.84D-09 DEPred=-2.39D-11 R= 1.60D+02
 Trust test= 1.60D+02 RLast= 1.13D-04 DXMaxT set to 5.05D-01
 ITU=  0  0  1  1  0
     Eigenvalues ---    0.00239   0.00247   0.00353   0.00367   0.01957
     Eigenvalues ---    0.04399   0.04405   0.04483   0.04484   0.04557
     Eigenvalues ---    0.04650   0.04891   0.04948   0.08182   0.08405
     Eigenvalues ---    0.10209   0.11628   0.12211   0.12285   0.12620
     Eigenvalues ---    0.13336   0.13440   0.16043   0.16134   0.19033
     Eigenvalues ---    0.22558   0.24336   0.29156   0.29176   0.29641
     Eigenvalues ---    0.30161   0.31827   0.32632   0.33044   0.33061
     Eigenvalues ---    0.33574   0.33580   0.34210   0.34316   0.34861
     Eigenvalues ---    0.36529   0.43497
 En-DIIS/RFO-DIIS IScMMF=        0 using points:     5    4    3    2
 RFO step:  Lambda=-5.48385791D-15.
 DidBck=F Rises=F RFO-DIIS coefs:    0.99932    0.00042    0.00026    0.00000
 Iteration  1 RMS(Cart)=  0.00000020 RMS(Int)=  0.00000000
 Variable       Old X    -DE/DX   Delta X   Delta X   Delta X     New X
                                 (Linear)    (Quad)   (Total)
    R1        1.91924   0.00000   0.00000   0.00000   0.00000   1.91924
    R2        2.75782   0.00000   0.00000   0.00000   0.00000   2.75782
    R3        2.75782   0.00000   0.00000   0.00000   0.00000   2.75782
    R4        2.08751   0.00000   0.00000   0.00000   0.00000   2.08751
    R5        2.06852   0.00000   0.00000   0.00000   0.00000   2.06852
    R6        2.87853   0.00000   0.00000   0.00000   0.00000   2.87853
    R7        2.06350   0.00000   0.00000   0.00000   0.00000   2.06350
    R8        2.06220   0.00000   0.00000   0.00000   0.00000   2.06220
    R9        2.06705   0.00000   0.00000   0.00000   0.00000   2.06705
   R10        2.06852   0.00000   0.00000   0.00000   0.00000   2.06852
   R11        2.08751   0.00000   0.00000   0.00000   0.00000   2.08751
   R12        2.87853   0.00000   0.00000   0.00000   0.00000   2.87853
   R13        2.06220   0.00000   0.00000   0.00000   0.00000   2.06220
   R14        2.06350   0.00000   0.00000   0.00000   0.00000   2.06350
   R15        2.06705   0.00000   0.00000   0.00000   0.00000   2.06705
    A1        1.91092   0.00000   0.00000   0.00000   0.00000   1.91092
    A2        1.91092   0.00000   0.00000   0.00000   0.00000   1.91092
    A3        1.99215   0.00000   0.00000   0.00000   0.00000   1.99215
    A4        1.95963   0.00000   0.00000   0.00000   0.00000   1.95963
    A5        1.88003   0.00000   0.00000   0.00000   0.00000   1.88003
    A6        1.94233   0.00000   0.00000   0.00000   0.00000   1.94233
    A7        1.85524   0.00000   0.00000   0.00000   0.00000   1.85524
    A8        1.91207   0.00000   0.00000   0.00000   0.00000   1.91207
    A9        1.91184   0.00000   0.00000   0.00000   0.00000   1.91184
   A10        1.93441   0.00000   0.00000   0.00000   0.00000   1.93441
   A11        1.93153   0.00000   0.00000   0.00000   0.00000   1.93153
   A12        1.93909   0.00000   0.00000   0.00000   0.00000   1.93909
   A13        1.89521   0.00000   0.00000   0.00000   0.00000   1.89521
   A14        1.87681   0.00000   0.00000   0.00000   0.00000   1.87681
   A15        1.88491   0.00000   0.00000   0.00000   0.00000   1.88491
   A16        1.88003   0.00000   0.00000   0.00000   0.00000   1.88003
   A17        1.95963   0.00000   0.00000   0.00000   0.00000   1.95963
   A18        1.94233   0.00000   0.00000   0.00000   0.00000   1.94233
   A19        1.85524   0.00000   0.00000   0.00000   0.00000   1.85524
   A20        1.91184   0.00000   0.00000   0.00000   0.00000   1.91184
   A21        1.91207   0.00000   0.00000   0.00000   0.00000   1.91207
   A22        1.93153   0.00000   0.00000   0.00000   0.00000   1.93153
   A23        1.93441   0.00000   0.00000   0.00000   0.00000   1.93441
   A24        1.93909   0.00000   0.00000   0.00000   0.00000   1.93909
   A25        1.89521   0.00000   0.00000   0.00000   0.00000   1.89521
   A26        1.88491   0.00000   0.00000   0.00000   0.00000   1.88491
   A27        1.87681   0.00000   0.00000   0.00000   0.00000   1.87681
    D1        1.18996   0.00000   0.00000   0.00000   0.00000   1.18996
    D2       -3.05650   0.00000   0.00000   0.00000   0.00000  -3.05650
    D3       -0.96058   0.00000   0.00000   0.00000   0.00000  -0.96058
    D4       -0.95890   0.00000   0.00000   0.00000   0.00000  -0.95890
    D5        1.07783   0.00000   0.00000   0.00000   0.00000   1.07783
    D6       -3.10943   0.00000   0.00000   0.00000   0.00000  -3.10943
    D7        3.05650   0.00000   0.00000   0.00000   0.00000   3.05650
    D8       -1.18996   0.00000   0.00000   0.00000   0.00000  -1.18996
    D9        0.96058   0.00000   0.00000   0.00000   0.00000   0.96058
   D10       -1.07783   0.00000   0.00000   0.00000   0.00000  -1.07783
   D11        0.95890   0.00000   0.00000   0.00000   0.00000   0.95890
   D12        3.10943   0.00000   0.00000   0.00000   0.00000   3.10943
   D13       -3.11337   0.00000   0.00000   0.00000   0.00000  -3.11337
   D14       -1.00964   0.00000   0.00000   0.00000   0.00000  -1.00964
   D15        1.08422   0.00000   0.00000   0.00000   0.00000   1.08422
   D16        0.99231   0.00000   0.00000   0.00000   0.00000   0.99231
   D17        3.09605   0.00000   0.00000   0.00000   0.00000   3.09605
   D18       -1.09328   0.00000   0.00000   0.00000   0.00000  -1.09328
   D19       -1.03638   0.00000   0.00000   0.00000   0.00000  -1.03638
   D20        1.06736   0.00000   0.00000   0.00000   0.00000   1.06736
   D21       -3.12197   0.00000   0.00000   0.00000   0.00000  -3.12197
   D22        1.00964   0.00000   0.00000   0.00000   0.00000   1.00964
   D23        3.11337   0.00000   0.00000   0.00000   0.00000   3.11337
   D24       -1.08422   0.00000   0.00000   0.00000   0.00000  -1.08422
   D25       -1.06736   0.00000   0.00000   0.00000   0.00000  -1.06736
   D26        1.03638   0.00000   0.00000   0.00000   0.00000   1.03638
   D27        3.12197   0.00000   0.00000   0.00000   0.00000   3.12197
   D28       -3.09605   0.00000   0.00000   0.00000   0.00000  -3.09605
   D29       -0.99231   0.00000   0.00000   0.00000   0.00000  -0.99231
   D30        1.09328   0.00000   0.00000   0.00000   0.00000   1.09328
         Item               Value     Threshold  Converged?
 Maximum Force            0.000000     0.000015     YES
 RMS     Force            0.000000     0.000010     YES
 Maximum Displacement     0.000001     0.000060     YES
 RMS     Displacement     0.000000     0.000040     YES
 Predicted change in Energy=-8.540365D-15
 Optimization completed.
    -- Stationary point found.
                           ----------------------------
                           !   Optimized Parameters   !
                           ! (Angstroms and Degrees)  !
 --------------------------                            --------------------------
 ! Name  Definition              Value          Derivative Info.                !
 --------------------------------------------------------------------------------
 ! R1    R(1,2)                  1.0156         -DE/DX =    0.0                 !
 ! R2    R(1,3)                  1.4594         -DE/DX =    0.0                 !
 ! R3    R(1,10)                 1.4594         -DE/DX =    0.0                 !
 ! R4    R(3,4)                  1.1047         -DE/DX =    0.0                 !
 ! R5    R(3,5)                  1.0946         -DE/DX =    0.0                 !
 ! R6    R(3,6)                  1.5233         -DE/DX =    0.0                 !
 ! R7    R(6,7)                  1.092          -DE/DX =    0.0                 !
 ! R8    R(6,8)                  1.0913         -DE/DX =    0.0                 !
 ! R9    R(6,9)                  1.0938         -DE/DX =    0.0                 !
 ! R10   R(10,11)                1.0946         -DE/DX =    0.0                 !
 ! R11   R(10,12)                1.1047         -DE/DX =    0.0                 !
 ! R12   R(10,13)                1.5233         -DE/DX =    0.0                 !
 ! R13   R(13,14)                1.0913         -DE/DX =    0.0                 !
 ! R14   R(13,15)                1.092          -DE/DX =    0.0                 !
 ! R15   R(13,16)                1.0938         -DE/DX =    0.0                 !
 ! A1    A(2,1,3)              109.4876         -DE/DX =    0.0                 !
 ! A2    A(2,1,10)             109.4876         -DE/DX =    0.0                 !
 ! A3    A(3,1,10)             114.142          -DE/DX =    0.0                 !
 ! A4    A(1,3,4)              112.2787         -DE/DX =    0.0                 !
 ! A5    A(1,3,5)              107.7175         -DE/DX =    0.0                 !
 ! A6    A(1,3,6)              111.2876         -DE/DX =    0.0                 !
 ! A7    A(4,3,5)              106.2977         -DE/DX =    0.0                 !
 ! A8    A(4,3,6)              109.5536         -DE/DX =    0.0                 !
 ! A9    A(5,3,6)              109.5406         -DE/DX =    0.0                 !
 ! A10   A(3,6,7)              110.8338         -DE/DX =    0.0                 !
 ! A11   A(3,6,8)              110.6686         -DE/DX =    0.0                 !
 ! A12   A(3,6,9)              111.1018         -DE/DX =    0.0                 !
 ! A13   A(7,6,8)              108.5874         -DE/DX =    0.0                 !
 ! A14   A(7,6,9)              107.5332         -DE/DX =    0.0                 !
 ! A15   A(8,6,9)              107.9971         -DE/DX =    0.0                 !
 ! A16   A(1,10,11)            107.7175         -DE/DX =    0.0                 !
 ! A17   A(1,10,12)            112.2787         -DE/DX =    0.0                 !
 ! A18   A(1,10,13)            111.2876         -DE/DX =    0.0                 !
 ! A19   A(11,10,12)           106.2977         -DE/DX =    0.0                 !
 ! A20   A(11,10,13)           109.5406         -DE/DX =    0.0                 !
 ! A21   A(12,10,13)           109.5536         -DE/DX =    0.0                 !
 ! A22   A(10,13,14)           110.6686         -DE/DX =    0.0                 !
 ! A23   A(10,13,15)           110.8338         -DE/DX =    0.0                 !
 ! A24   A(10,13,16)           111.1018         -DE/DX =    0.0                 !
 ! A25   A(14,13,15)           108.5874         -DE/DX =    0.0                 !
 ! A26   A(14,13,16)           107.9971         -DE/DX =    0.0                 !
 ! A27   A(15,13,16)           107.5332         -DE/DX =    0.0                 !
 ! D1    D(2,1,3,4)             68.1796         -DE/DX =    0.0                 !
 ! D2    D(2,1,3,5)           -175.1244         -DE/DX =    0.0                 !
 ! D3    D(2,1,3,6)            -55.037          -DE/DX =    0.0                 !
 ! D4    D(10,1,3,4)           -54.9408         -DE/DX =    0.0                 !
 ! D5    D(10,1,3,5)            61.7551         -DE/DX =    0.0                 !
 ! D6    D(10,1,3,6)          -178.1574         -DE/DX =    0.0                 !
 ! D7    D(2,1,10,11)          175.1244         -DE/DX =    0.0                 !
 ! D8    D(2,1,10,12)          -68.1796         -DE/DX =    0.0                 !
 ! D9    D(2,1,10,13)           55.037          -DE/DX =    0.0                 !
 ! D10   D(3,1,10,11)          -61.7552         -DE/DX =    0.0                 !
 ! D11   D(3,1,10,12)           54.9408         -DE/DX =    0.0                 !
 ! D12   D(3,1,10,13)          178.1574         -DE/DX =    0.0                 !
 ! D13   D(1,3,6,7)           -178.3832         -DE/DX =    0.0                 !
 ! D14   D(1,3,6,8)            -57.8481         -DE/DX =    0.0                 !
 ! D15   D(1,3,6,9)             62.1214         -DE/DX =    0.0                 !
 ! D16   D(4,3,6,7)             56.8553         -DE/DX =    0.0                 !
 ! D17   D(4,3,6,8)            177.3903         -DE/DX =    0.0                 !
 ! D18   D(4,3,6,9)            -62.6402         -DE/DX =    0.0                 !
 ! D19   D(5,3,6,7)            -59.3801         -DE/DX =    0.0                 !
 ! D20   D(5,3,6,8)             61.155          -DE/DX =    0.0                 !
 ! D21   D(5,3,6,9)           -178.8755         -DE/DX =    0.0                 !
 ! D22   D(1,10,13,14)          57.8481         -DE/DX =    0.0                 !
 ! D23   D(1,10,13,15)         178.3832         -DE/DX =    0.0                 !
 ! D24   D(1,10,13,16)         -62.1214         -DE/DX =    0.0                 !
 ! D25   D(11,10,13,14)        -61.155          -DE/DX =    0.0                 !
 ! D26   D(11,10,13,15)         59.3801         -DE/DX =    0.0                 !
 ! D27   D(11,10,13,16)        178.8755         -DE/DX =    0.0                 !
 ! D28   D(12,10,13,14)       -177.3904         -DE/DX =    0.0                 !
 ! D29   D(12,10,13,15)        -56.8553         -DE/DX =    0.0                 !
 ! D30   D(12,10,13,16)         62.6402         -DE/DX =    0.0                 !
 --------------------------------------------------------------------------------
 GradGradGradGradGradGradGradGradGradGradGradGradGradGradGradGradGradGrad

                          Input orientation:                          
 ---------------------------------------------------------------------
 Center     Atomic      Atomic             Coordinates (Angstroms)
 Number     Number       Type             X           Y           Z
 ---------------------------------------------------------------------
      1          7           0       -0.038335    0.584724   -0.321913
      2          1           0       -0.107301    1.261202   -1.076299
      3          6           0        1.312152    0.607788    0.230748
      4          1           0        1.531020    1.551020    0.762433
      5          1           0        1.379850   -0.189010    0.978220
      6          6           0        2.357373    0.379368   -0.853517
      7          1           0        3.362870    0.369653   -0.427781
      8          1           0        2.185061   -0.571538   -1.360422
      9          1           0        2.325350    1.173592   -1.604956
     10          6           0       -1.088881    0.839912    0.658402
     11          1           0       -1.043460    0.045267    1.409841
     12          1           0       -0.933371    1.789269    1.201371
     13          6           0       -2.465062    0.845585    0.005417
     14          1           0       -2.656401   -0.103482   -0.498099
     15          1           0       -3.247354    1.008707    0.749581
     16          1           0       -2.545179    1.644458   -0.737455
 ---------------------------------------------------------------------
                    Distance matrix (angstroms):
                    1          2          3          4          5
     1  N    0.000000
     2  H    1.015618   0.000000
     3  C    1.459378   2.037197   0.000000
     4  H    2.138320   2.479724   1.104662   0.000000
     5  H    2.073706   2.921606   1.094616   1.759864   0.000000
     6  C    2.462559   2.627144   1.523251   2.160306   2.152642
     7  H    3.409643   3.641089   2.166982   2.483528   2.494256
     8  H    2.712736   2.948659   2.164395   3.072383   2.502786
     9  H    2.753176   2.490973   2.171754   2.525458   3.069764
    10  C    1.459378   2.037197   2.449843   2.716686   2.693621
    11  H    2.073706   2.921606   2.693621   3.051946   2.472572
    12  H    2.138320   2.479724   2.716686   2.514489   3.051946
    13  C    2.462559   2.627144   3.791394   4.127879   4.098790
    14  H    2.712736   2.948659   4.097138   4.675555   4.298622
    15  H    3.409643   3.641089   4.606411   4.809068   4.785167
    16  H    2.753176   2.490973   4.109879   4.344398   4.659506
                    6          7          8          9         10
     6  C    0.000000
     7  H    1.091957   0.000000
     8  H    1.091269   1.772821   0.000000
     9  H    1.093836   1.763096   1.767755   0.000000
    10  C    3.791394   4.606411   4.097138   4.109879   0.000000
    11  H    4.098790   4.785167   4.298622   4.659506   1.094616
    12  H    4.127879   4.809068   4.675555   4.344398   1.104662
    13  C    4.920468   5.863358   5.049495   5.064478   1.523251
    14  H    5.049495   6.038247   4.939883   5.260599   2.164395
    15  H    5.863358   6.744601   6.038248   6.051948   2.166982
    16  H    5.064478   6.051948   5.260599   4.969540   2.171754
                   11         12         13         14         15
    11  H    0.000000
    12  H    1.759864   0.000000
    13  C    2.152642   2.160306   0.000000
    14  H    2.502786   3.072383   1.091269   0.000000
    15  H    2.494256   2.483528   1.091957   1.772821   0.000000
    16  H    3.069764   2.525458   1.093836   1.767755   1.763096
                   16
    16  H    0.000000
 Stoichiometry    C4H11N
 Framework group  C1[X(C4H11N)]
 Deg. of freedom    42
 Full point group                 C1      NOp   1
 Largest Abelian subgroup         C1      NOp   1
 Largest concise Abelian subgroup C1      NOp   1
                         Standard orientation:                         
 ---------------------------------------------------------------------
 Center     Atomic      Atomic             Coordinates (Angstroms)
 Number     Number       Type             X           Y           Z
 ---------------------------------------------------------------------
      1          7           0        0.000000   -0.270153   -0.067793
      2          1           0        0.000000   -0.980030    0.658536
      3          6           0       -1.224921    0.518084    0.021830
      4          1           0       -1.257244    1.139440    0.934600
      5          1           0       -1.236286    1.213298   -0.823588
      6          6           0       -2.460234   -0.371437   -0.033379
      7          1           0       -3.372301    0.227723    0.005505
      8          1           0       -2.469941   -0.960537   -0.951930
      9          1           0       -2.484770   -1.064253    0.812718
     10          6           0        1.224921    0.518084    0.021830
     11          1           0        1.236286    1.213298   -0.823588
     12          1           0        1.257244    1.139441    0.934600
     13          6           0        2.460234   -0.371437   -0.033379
     14          1           0        2.469941   -0.960538   -0.951929
     15          1           0        3.372301    0.227723    0.005505
     16          1           0        2.484770   -1.064253    0.812718
 ---------------------------------------------------------------------
 Rotational constants (GHZ):     17.7984838      2.0882006      1.9680406

 **********************************************************************

            Population analysis using the SCF density.

 **********************************************************************

 Orbital symmetries:
       Occupied  (A) (A) (A) (A) (A) (A) (A) (A) (A) (A) (A) (A)
                 (A) (A) (A) (A) (A) (A) (A) (A) (A)
       Virtual   (A) (A) (A) (A) (A) (A) (A) (A) (A) (A) (A) (A)
                 (A) (A) (A) (A) (A) (A) (A) (A) (A) (A) (A) (A)
                 (A) (A) (A) (A) (A) (A) (A) (A) (A) (A) (A) (A)
                 (A) (A) (A) (A) (A) (A) (A) (A) (A) (A) (A) (A)
                 (A) (A) (A) (A) (A) (A) (A) (A) (A) (A) (A) (A)
                 (A) (A) (A) (A) (A) (A) (A) (A) (A) (A) (A) (A)
                 (A) (A) (A) (A) (A) (A) (A) (A) (A) (A) (A) (A)
                 (A) (A) (A) (A) (A) (A) (A) (A) (A) (A) (A) (A)
                 (A) (A) (A) (A) (A) (A) (A) (A) (A) (A) (A) (A)
                 (A) (A) (A) (A) (A) (A) (A) (A) (A) (A) (A) (A)
                 (A) (A) (A) (A) (A) (A) (A) (A) (A) (A) (A) (A)
                 (A) (A) (A) (A) (A) (A) (A) (A)
 The electronic state is 1-A.
 Alpha  occ. eigenvalues --  -14.29582 -10.19086 -10.19084 -10.15978 -10.15978
 Alpha  occ. eigenvalues --   -0.90414  -0.76475  -0.71236  -0.61053  -0.60586
 Alpha  occ. eigenvalues --   -0.48564  -0.46751  -0.43872  -0.43402  -0.40300
 Alpha  occ. eigenvalues --   -0.37287  -0.36607  -0.35152  -0.34636  -0.34010
 Alpha  occ. eigenvalues --   -0.22419
 Alpha virt. eigenvalues --    0.03167   0.05129   0.06300   0.07886   0.10152
 Alpha virt. eigenvalues --    0.10824   0.11442   0.12336   0.12750   0.13484
 Alpha virt. eigenvalues --    0.13747   0.14348   0.18662   0.18758   0.19071
 Alpha virt. eigenvalues --    0.19915   0.22974   0.25518   0.26860   0.28198
 Alpha virt. eigenvalues --    0.30336   0.30899   0.32609   0.35010   0.38624
 Alpha virt. eigenvalues --    0.39893   0.40641   0.42275   0.42498   0.44433
 Alpha virt. eigenvalues --    0.45321   0.45812   0.46100   0.46144   0.48022
 Alpha virt. eigenvalues --    0.48476   0.50825   0.51349   0.51838   0.56095
 Alpha virt. eigenvalues --    0.57798   0.60376   0.60685   0.63019   0.70958
 Alpha virt. eigenvalues --    0.71026   1.11934   1.14315   1.18064   1.23123
 Alpha virt. eigenvalues --    1.23183   1.26836   1.27615   1.28287   1.29732
 Alpha virt. eigenvalues --    1.32575   1.33033   1.33816   1.36426   1.39078
 Alpha virt. eigenvalues --    1.40496   1.42227   1.45449   1.46441   1.52070
 Alpha virt. eigenvalues --    1.52981   1.54238   1.54478   1.54826   1.56606
 Alpha virt. eigenvalues --    1.62657   1.63396   1.66235   1.68111   1.73154
 Alpha virt. eigenvalues --    1.77634   1.78682   1.79357   1.79462   1.79634
 Alpha virt. eigenvalues --    1.82273   1.83338   1.85521   1.88180   1.89365
 Alpha virt. eigenvalues --    1.91716   1.93110   1.99751   2.06402   2.08308
 Alpha virt. eigenvalues --    2.14034   2.14769   2.17803   2.18372   2.26222
 Alpha virt. eigenvalues --    2.26923   2.28668   2.29368   2.32534   2.34061
 Alpha virt. eigenvalues --    2.36472   2.42911   2.46228   2.47665   2.51812
 Alpha virt. eigenvalues --    2.51833   2.53108   2.57546   2.59984   2.60979
 Alpha virt. eigenvalues --    2.62661   2.64114   2.66721   2.68428   2.69140
 Alpha virt. eigenvalues --    2.73355   2.75845   2.87212   2.90286   2.93325
 Alpha virt. eigenvalues --    2.94139   2.94311   3.12644   3.18612   3.27580
 Alpha virt. eigenvalues --    3.29902   3.32094   3.33312   3.34665   3.37284
 Alpha virt. eigenvalues --    3.40241   3.42041   3.44258   3.80429   3.87309
 Alpha virt. eigenvalues --   21.92176  21.97729  22.03097  22.04087  31.85051
          Condensed to atoms (all electrons):
               1          2          3          4          5          6
     1  N    6.649538   0.357904   0.310731  -0.067532  -0.052744  -0.070898
     2  H    0.357904   0.556252  -0.045524  -0.011323   0.011992  -0.007102
     3  C    0.310731  -0.045524   4.994935   0.391580   0.405502   0.282727
     4  H   -0.067532  -0.011323   0.391580   0.724780  -0.072947  -0.055192
     5  H   -0.052744   0.011992   0.405502  -0.072947   0.632421  -0.020981
     6  C   -0.070898  -0.007102   0.282727  -0.055192  -0.020981   4.999522
     7  H    0.008952  -0.000089  -0.039914   0.005817  -0.005735   0.391892
     8  H    0.011837  -0.002427  -0.045802   0.013473  -0.012713   0.400880
     9  H   -0.008841   0.008248  -0.039857  -0.013966   0.009939   0.411916
    10  C    0.310731  -0.045524  -0.067110  -0.016261  -0.009354   0.012650
    11  H   -0.052744   0.011992  -0.009354  -0.006739   0.012963   0.000543
    12  H   -0.067532  -0.011323  -0.016261   0.028682  -0.006739   0.000339
    13  C   -0.070898  -0.007102   0.012650   0.000339   0.000543  -0.001180
    14  H    0.011837  -0.002427  -0.000660   0.000427  -0.000358  -0.000032
    15  H    0.008952  -0.000089  -0.000834   0.000248  -0.000101   0.000061
    16  H   -0.008841   0.008248  -0.000191  -0.000346   0.000131  -0.000047
               7          8          9         10         11         12
     1  N    0.008952   0.011837  -0.008841   0.310731  -0.052744  -0.067532
     2  H   -0.000089  -0.002427   0.008248  -0.045524   0.011992  -0.011323
     3  C   -0.039914  -0.045802  -0.039857  -0.067110  -0.009354  -0.016261
     4  H    0.005817   0.013473  -0.013966  -0.016261  -0.006739   0.028682
     5  H   -0.005735  -0.012713   0.009939  -0.009354   0.012963  -0.006739
     6  C    0.391892   0.400880   0.411916   0.012650   0.000543   0.000339
     7  H    0.580045  -0.022013  -0.031625  -0.000834  -0.000101   0.000248
     8  H   -0.022013   0.572486  -0.036286  -0.000660  -0.000358   0.000427
     9  H   -0.031625  -0.036286   0.598682  -0.000191   0.000131  -0.000346
    10  C   -0.000834  -0.000660  -0.000191   4.994935   0.405502   0.391580
    11  H   -0.000101  -0.000358   0.000131   0.405502   0.632421  -0.072947
    12  H    0.000248   0.000427  -0.000346   0.391580  -0.072947   0.724780
    13  C    0.000061  -0.000032  -0.000047   0.282727  -0.020981  -0.055192
    14  H    0.000008   0.000104  -0.000020  -0.045802  -0.012713   0.013473
    15  H   -0.000001   0.000008  -0.000004  -0.039914  -0.005735   0.005817
    16  H   -0.000004  -0.000020   0.000008  -0.039857   0.009939  -0.013966
              13         14         15         16
     1  N   -0.070898   0.011837   0.008952  -0.008841
     2  H   -0.007102  -0.002427  -0.000089   0.008248
     3  C    0.012650  -0.000660  -0.000834  -0.000191
     4  H    0.000339   0.000427   0.000248  -0.000346
     5  H    0.000543  -0.000358  -0.000101   0.000131
     6  C   -0.001180  -0.000032   0.000061  -0.000047
     7  H    0.000061   0.000008  -0.000001  -0.000004
     8  H   -0.000032   0.000104   0.000008  -0.000020
     9  H   -0.000047  -0.000020  -0.000004   0.000008
    10  C    0.282727  -0.045802  -0.039914  -0.039857
    11  H   -0.020981  -0.012713  -0.005735   0.009939
    12  H   -0.055192   0.013473   0.005817  -0.013966
    13  C    4.999522   0.400880   0.391892   0.411916
    14  H    0.400880   0.572486  -0.022013  -0.036286
    15  H    0.391892  -0.022013   0.580045  -0.031625
    16  H    0.411916  -0.036286  -0.031625   0.598682
 Mulliken charges:
               1
     1  N   -0.270453
     2  H    0.178295
     3  C   -0.132618
     4  H    0.078961
     5  H    0.108183
     6  C   -0.345097
     7  H    0.113293
     8  H    0.121097
     9  H    0.102261
    10  C   -0.132618
    11  H    0.108183
    12  H    0.078961
    13  C   -0.345097
    14  H    0.121097
    15  H    0.113293
    16  H    0.102261
 Sum of Mulliken charges =   0.00000
 Mulliken charges with hydrogens summed into heavy atoms:
               1
     1  N   -0.092158
     3  C    0.054526
     6  C   -0.008447
    10  C    0.054526
    13  C   -0.008447
 APT charges:
               1
     1  N   -0.578415
     2  H    0.104215
     3  C    0.415747
     4  H   -0.123645
     5  H   -0.049822
     6  C    0.058460
     7  H   -0.024559
     8  H   -0.010543
     9  H   -0.028538
    10  C    0.415747
    11  H   -0.049822
    12  H   -0.123645
    13  C    0.058460
    14  H   -0.010543
    15  H   -0.024559
    16  H   -0.028538
 Sum of APT charges =   0.00000
 APT charges with hydrogens summed into heavy atoms:
               1
     1  N   -0.474199
     3  C    0.242279
     6  C   -0.005180
    10  C    0.242279
    13  C   -0.005180
 Electronic spatial extent (au):  <R**2>=            673.0040
 Charge=              0.0000 electrons
 Dipole moment (field-independent basis, Debye):
    X=              0.0000    Y=              0.3197    Z=              0.8445  Tot=              0.9030
 Quadrupole moment (field-independent basis, Debye-Ang):
   XX=            -33.7104   YY=            -34.7664   ZZ=            -34.7196
   XY=              0.0000   XZ=              0.0000   YZ=             -1.8034
 Traceless Quadrupole moment (field-independent basis, Debye-Ang):
   XX=              0.6884   YY=             -0.3676   ZZ=             -0.3208
   XY=              0.0000   XZ=              0.0000   YZ=             -1.8034
 Octapole moment (field-independent basis, Debye-Ang**2):
  XXX=              0.0000  YYY=             -1.5513  ZZZ=              0.1073  XYY=              0.0000
  XXY=              1.8404  XXZ=             -1.0869  XZZ=              0.0000  YZZ=             -0.7793
  YYZ=              0.5967  XYZ=              0.0000
 Hexadecapole moment (field-independent basis, Debye-Ang**3):
 XXXX=           -767.7197 YYYY=           -121.2855 ZZZZ=            -69.6956 XXXY=              0.0000
 XXXZ=              0.0000 YYYX=              0.0000 YYYZ=             -3.9495 ZZZX=              0.0000
 ZZZY=             -2.2183 XXYY=           -148.0360 XXZZ=           -140.4374 YYZZ=            -29.1654
 XXYZ=             -0.7456 YYXZ=              0.0000 ZZXY=              0.0000
 N-N= 1.881921639144D+02 E-N=-8.720895683571D+02  KE= 2.126852888042D+02
  Exact polarizability:  70.317   0.000  56.229   0.000   0.540  53.015
 Approx polarizability:  78.314   0.000  78.049   0.000   0.101  75.914
 Rotating derivatives to standard orientation.
 Full mass-weighted force constant matrix:
 Low frequencies ---  -12.6686   -0.0009   -0.0006   -0.0005    3.5238   21.0319
 Low frequencies ---  107.5400  112.8791  184.9240
 Diagonal vibrational polarizability:
        5.4477289       7.1565503       3.4035922
 Harmonic frequencies (cm**-1), IR intensities (KM/Mole), Raman scattering
 activities (A**4/AMU), depolarization ratios for plane and unpolarized
 incident light, reduced masses (AMU), force constants (mDyne/A),
 and normal coordinates:
                      1                      2                      3
                      A                      A                      A
 Frequencies --    107.4600               112.8481               184.9231
 Red. masses --      2.6043                 1.5617                 2.6563
 Frc consts  --      0.0177                 0.0117                 0.0535
 IR Inten    --      1.4000                 1.1383                 0.8355
  Atom  AN      X      Y      Z        X      Y      Z        X      Y      Z
     1   7     0.00  -0.02   0.28     0.00   0.00   0.00     0.00   0.20   0.02
     2   1     0.00   0.16   0.46     0.09   0.00   0.00     0.00   0.14  -0.04
     3   6    -0.01   0.00   0.03     0.00  -0.01   0.14    -0.06   0.09   0.00
     4   1    -0.17   0.06  -0.02    -0.01  -0.19   0.26    -0.17   0.08   0.00
     5   1     0.16  -0.06  -0.02     0.02   0.16   0.28    -0.16   0.08  -0.01
     6   6    -0.01   0.01  -0.16     0.00   0.01  -0.07     0.12  -0.16  -0.01
     7   1    -0.01   0.02  -0.39     0.00   0.00   0.12    -0.03  -0.38   0.00
     8   1     0.18  -0.05  -0.12    -0.03   0.26  -0.23     0.26  -0.16  -0.01
     9   1    -0.19   0.06  -0.12     0.02  -0.23  -0.26     0.28  -0.18  -0.02
    10   6     0.01   0.00   0.03     0.00   0.01  -0.14     0.06   0.09   0.00
    11   1    -0.16  -0.06  -0.02     0.02  -0.16  -0.28     0.16   0.08  -0.01
    12   1     0.17   0.06  -0.02    -0.01   0.19  -0.26     0.17   0.08   0.00
    13   6     0.01   0.01  -0.16     0.00  -0.01   0.07    -0.12  -0.16  -0.01
    14   1    -0.18  -0.05  -0.12    -0.03  -0.26   0.23    -0.26  -0.16  -0.01
    15   1     0.01   0.02  -0.39     0.00   0.00  -0.12     0.03  -0.38   0.00
    16   1     0.19   0.06  -0.12     0.02   0.23   0.26    -0.28  -0.18  -0.02
                      4                      5                      6
                      A                      A                      A
 Frequencies --    254.5189               255.3888               423.6991
 Red. masses --      1.1503                 1.1269                 3.3175
 Frc consts  --      0.0439                 0.0433                 0.3509
 IR Inten    --      0.6337                 1.0206                 0.2451
  Atom  AN      X      Y      Z        X      Y      Z        X      Y      Z
     1   7     0.00   0.00   0.00     0.00  -0.01   0.08     0.00  -0.14  -0.01
     2   1     0.07   0.00   0.00     0.00   0.11   0.20     0.00  -0.05   0.09
     3   6     0.00  -0.01   0.08     0.00   0.00  -0.04     0.18   0.02   0.00
     4   1     0.00  -0.08   0.13    -0.02   0.08  -0.09     0.29   0.02   0.01
     5   1     0.01   0.06   0.13     0.03  -0.07  -0.10     0.27   0.02   0.00
     6   6     0.00   0.00  -0.01     0.00   0.00   0.00     0.24   0.05   0.00
     7   1     0.00   0.03  -0.42     0.00  -0.02   0.40     0.19  -0.03  -0.02
     8   1     0.25  -0.22   0.13    -0.23   0.25  -0.16     0.33   0.05   0.00
     9   1    -0.26   0.22   0.16     0.22  -0.23  -0.19     0.30   0.04  -0.01
    10   6     0.00   0.01  -0.08     0.00   0.00  -0.04    -0.18   0.02   0.00
    11   1     0.01  -0.06  -0.13    -0.03  -0.07  -0.10    -0.27   0.02   0.00
    12   1     0.00   0.08  -0.13     0.02   0.08  -0.09    -0.29   0.02   0.01
    13   6     0.00   0.00   0.01     0.00   0.00   0.00    -0.24   0.05   0.00
    14   1     0.25   0.22  -0.13     0.23   0.25  -0.16    -0.33   0.05   0.00
    15   1     0.00  -0.03   0.42     0.00  -0.02   0.40    -0.19  -0.03  -0.02
    16   1    -0.26  -0.22  -0.16    -0.22  -0.23  -0.19    -0.30   0.04  -0.01
                      7                      8                      9
                      A                      A                      A
 Frequencies --    428.9401               754.2211               814.9185
 Red. masses --      2.4011                 1.3465                 1.0866
 Frc consts  --      0.2603                 0.4513                 0.4251
 IR Inten    --      0.3726                85.6993                 0.3190
  Atom  AN      X      Y      Z        X      Y      Z        X      Y      Z
     1   7    -0.16   0.00   0.00     0.00  -0.10  -0.08     0.00   0.00   0.00
     2   1    -0.30   0.00   0.00     0.00   0.60   0.63     0.08   0.00   0.00
     3   6    -0.05   0.18   0.02    -0.03   0.05   0.00     0.00   0.00   0.05
     4   1    -0.03   0.15   0.04     0.08  -0.11   0.10     0.12   0.31  -0.16
     5   1    -0.05   0.18   0.03    -0.03   0.16   0.10    -0.13  -0.29  -0.19
     6   6     0.11  -0.02   0.00    -0.03   0.00   0.00     0.00   0.00   0.03
     7   1    -0.08  -0.31  -0.04    -0.12  -0.13  -0.01     0.00   0.01  -0.13
     8   1     0.36  -0.04   0.00     0.07  -0.03   0.02     0.22   0.21  -0.11
     9   1     0.31  -0.04  -0.01     0.07  -0.01   0.00    -0.21  -0.20  -0.14
    10   6    -0.05  -0.18  -0.02     0.03   0.05   0.00     0.00   0.00  -0.05
    11   1    -0.05  -0.18  -0.03     0.03   0.16   0.10    -0.13   0.29   0.19
    12   1    -0.03  -0.15  -0.04    -0.08  -0.11   0.10     0.12  -0.31   0.16
    13   6     0.11   0.02   0.00     0.03   0.00   0.00     0.00   0.00  -0.03
    14   1     0.36   0.04   0.00    -0.07  -0.03   0.02     0.22  -0.21   0.11
    15   1    -0.08   0.31   0.04     0.12  -0.13  -0.01     0.00  -0.01   0.13
    16   1     0.31   0.04   0.01    -0.07  -0.01   0.00    -0.21   0.20   0.14
                     10                     11                     12
                      A                      A                      A
 Frequencies --    832.1531               902.1742               940.6436
 Red. masses --      1.1473                 1.3612                 2.2111
 Frc consts  --      0.4681                 0.6527                 1.1527
 IR Inten    --      0.4739                 4.6085                 0.7385
  Atom  AN      X      Y      Z        X      Y      Z        X      Y      Z
     1   7     0.00   0.04   0.04     0.00   0.09  -0.04     0.14   0.00   0.00
     2   1     0.00   0.03   0.03     0.00   0.42   0.29     0.16   0.00   0.00
     3   6     0.01  -0.02  -0.05     0.02  -0.06   0.00     0.06   0.10   0.00
     4   1    -0.18  -0.28   0.13     0.01  -0.06   0.01     0.19   0.10   0.00
     5   1     0.15   0.23   0.16    -0.22  -0.06   0.01     0.20   0.10   0.00
     6   6     0.02   0.00  -0.04     0.07  -0.03   0.02    -0.17  -0.03   0.00
     7   1     0.07   0.07   0.14     0.30   0.33  -0.04    -0.40  -0.39  -0.02
     8   1    -0.27  -0.21   0.11    -0.10   0.09  -0.06     0.06  -0.09   0.03
     9   1     0.19   0.21   0.15    -0.28  -0.06  -0.02     0.08  -0.09  -0.03
    10   6    -0.01  -0.02  -0.05    -0.02  -0.06   0.00     0.06  -0.10   0.00
    11   1    -0.15   0.23   0.16     0.22  -0.06   0.01     0.20  -0.10   0.00
    12   1     0.18  -0.28   0.13    -0.01  -0.06   0.01     0.19  -0.10   0.00
    13   6    -0.02   0.00  -0.04    -0.07  -0.03   0.02    -0.17   0.03   0.00
    14   1     0.27  -0.21   0.11     0.10   0.09  -0.06     0.06   0.09  -0.03
    15   1    -0.07   0.07   0.14    -0.30   0.33  -0.04    -0.40   0.39   0.02
    16   1    -0.19   0.21   0.15     0.28  -0.06  -0.02     0.08   0.09   0.03
                     13                     14                     15
                      A                      A                      A
 Frequencies --   1050.6033              1065.1071              1119.1587
 Red. masses --      3.0039                 1.7211                 1.4542
 Frc consts  --      1.9535                 1.1504                 1.0732
 IR Inten    --      6.9345                 0.3209                15.2825
  Atom  AN      X      Y      Z        X      Y      Z        X      Y      Z
     1   7     0.00   0.12   0.01     0.02   0.00   0.00    -0.06   0.00   0.00
     2   1     0.00   0.14   0.03     0.38   0.00   0.00     0.22   0.00   0.00
     3   6     0.23   0.06  -0.01    -0.08  -0.10   0.02     0.03   0.03   0.10
     4   1     0.40   0.06   0.01    -0.10   0.00  -0.05    -0.22   0.31  -0.09
     5   1     0.29   0.12   0.04     0.13  -0.18  -0.05     0.28  -0.21  -0.11
     6   6    -0.12  -0.12   0.00     0.01   0.12  -0.02     0.00  -0.04  -0.07
     7   1    -0.11  -0.09  -0.03    -0.20  -0.22   0.04     0.07   0.06   0.14
     8   1    -0.17  -0.11  -0.01     0.26   0.00   0.06    -0.27  -0.19   0.04
     9   1    -0.22  -0.15  -0.03     0.39   0.12   0.00     0.06   0.14   0.09
    10   6    -0.23   0.06  -0.01    -0.08   0.10  -0.02     0.03  -0.03  -0.10
    11   1    -0.29   0.12   0.04     0.13   0.18   0.05     0.28   0.21   0.11
    12   1    -0.40   0.06   0.01    -0.10   0.00   0.05    -0.22  -0.31   0.09
    13   6     0.12  -0.12   0.00     0.01  -0.12   0.02     0.00   0.04   0.07
    14   1     0.17  -0.11  -0.01     0.26   0.00  -0.06    -0.27   0.19  -0.04
    15   1     0.11  -0.09  -0.03    -0.20   0.22  -0.04     0.07  -0.06  -0.14
    16   1     0.22  -0.15  -0.03     0.39  -0.12   0.00     0.06  -0.14  -0.09
                     16                     17                     18
                      A                      A                      A
 Frequencies --   1150.6436              1167.4137              1229.7578
 Red. masses --      3.2816                 2.0046                 1.9335
 Frc consts  --      2.5599                 1.6096                 1.7228
 IR Inten    --     52.1212                13.4313                 1.7454
  Atom  AN      X      Y      Z        X      Y      Z        X      Y      Z
     1   7     0.30   0.00   0.00     0.00  -0.11  -0.07     0.00   0.10  -0.07
     2   1     0.37   0.00   0.00     0.00  -0.08  -0.01     0.00   0.29   0.13
     3   6    -0.18   0.13   0.02    -0.02   0.12   0.09     0.03  -0.10   0.11
     4   1    -0.36   0.11   0.00    -0.17   0.32  -0.06     0.07   0.18  -0.08
     5   1    -0.34   0.07  -0.02     0.10  -0.10  -0.09    -0.02  -0.35  -0.10
     6   6     0.05  -0.01  -0.01     0.03  -0.08  -0.06    -0.03   0.06  -0.08
     7   1     0.14   0.14   0.03     0.20   0.18   0.12    -0.12  -0.12   0.15
     8   1    -0.14   0.02  -0.02    -0.38  -0.14  -0.01    -0.02  -0.21   0.09
     9   1    -0.06   0.09   0.05    -0.12   0.12   0.10     0.31   0.18   0.04
    10   6    -0.18  -0.13  -0.02     0.02   0.12   0.09    -0.03  -0.10   0.11
    11   1    -0.34  -0.07   0.02    -0.10  -0.10  -0.09     0.02  -0.35  -0.10
    12   1    -0.36  -0.11   0.00     0.17   0.32  -0.06    -0.07   0.18  -0.08
    13   6     0.05   0.01   0.01    -0.03  -0.08  -0.06     0.03   0.06  -0.08
    14   1    -0.14  -0.02   0.02     0.38  -0.14  -0.01     0.02  -0.21   0.09
    15   1     0.14  -0.14  -0.03    -0.20   0.18   0.12     0.12  -0.12   0.15
    16   1    -0.06  -0.09  -0.05     0.12   0.12   0.10    -0.31   0.18   0.04
                     19                     20                     21
                      A                      A                      A
 Frequencies --   1288.1926              1319.7856              1363.5153
 Red. masses --      1.1666                 1.1484                 1.2678
 Frc consts  --      1.1406                 1.1785                 1.3887
 IR Inten    --      4.1342                 3.7665                25.4116
  Atom  AN      X      Y      Z        X      Y      Z        X      Y      Z
     1   7    -0.01   0.00   0.00     0.00   0.03  -0.07    -0.02   0.00   0.00
     2   1     0.18   0.00   0.00     0.00   0.13   0.04     0.29   0.00   0.00
     3   6    -0.01   0.01  -0.04     0.01  -0.02   0.01    -0.10   0.01  -0.01
     4   1    -0.38  -0.05   0.00    -0.45   0.02  -0.03     0.55   0.00   0.00
     5   1     0.47   0.09   0.02     0.49  -0.05  -0.03     0.32   0.05   0.02
     6   6     0.00  -0.01   0.07    -0.01   0.01   0.05     0.02  -0.04  -0.01
     7   1     0.03   0.04  -0.11    -0.02   0.00  -0.06     0.11   0.11   0.00
     8   1     0.11   0.16  -0.04     0.11   0.09  -0.01    -0.04   0.06  -0.06
     9   1    -0.13  -0.15  -0.05    -0.05  -0.10  -0.04     0.00   0.07   0.07
    10   6    -0.01  -0.01   0.04    -0.01  -0.02   0.01    -0.10  -0.01   0.01
    11   1     0.47  -0.09  -0.02    -0.49  -0.05  -0.03     0.32  -0.05  -0.02
    12   1    -0.38   0.05   0.00     0.45   0.02  -0.03     0.55   0.00   0.00
    13   6     0.00   0.01  -0.07     0.01   0.01   0.05     0.02   0.04   0.01
    14   1     0.11  -0.16   0.04    -0.11   0.09  -0.01    -0.04  -0.06   0.06
    15   1     0.03  -0.04   0.11     0.02   0.00  -0.06     0.11  -0.11   0.00
    16   1    -0.13   0.15   0.05     0.05  -0.10  -0.04     0.00  -0.07  -0.07
                     22                     23                     24
                      A                      A                      A
 Frequencies --   1406.0067              1415.9629              1431.5081
 Red. masses --      1.2501                 1.2535                 1.4178
 Frc consts  --      1.4560                 1.4807                 1.7118
 IR Inten    --      1.2326                12.1374                 3.0958
  Atom  AN      X      Y      Z        X      Y      Z        X      Y      Z
     1   7     0.00   0.02   0.00     0.00   0.00   0.00     0.00   0.04   0.00
     2   1     0.00   0.01  -0.01     0.00   0.00   0.00     0.00   0.04   0.00
     3   6    -0.07  -0.01   0.00    -0.02  -0.01   0.00    -0.10  -0.03   0.00
     4   1     0.29   0.05  -0.03     0.07   0.00  -0.01     0.36   0.07  -0.05
     5   1     0.28   0.04   0.03     0.07   0.00   0.00     0.35   0.04   0.05
     6   6    -0.05  -0.06  -0.01     0.09   0.05   0.01     0.08   0.02   0.00
     7   1     0.20   0.30   0.05    -0.20  -0.36  -0.06    -0.10  -0.23  -0.04
     8   1     0.26   0.13  -0.12    -0.38  -0.11   0.10    -0.29  -0.03   0.04
     9   1     0.23   0.13   0.14    -0.33  -0.11  -0.13    -0.25  -0.03  -0.05
    10   6     0.07  -0.01   0.00    -0.02   0.01   0.00     0.10  -0.03   0.00
    11   1    -0.28   0.04   0.03     0.07   0.00   0.00    -0.35   0.04   0.05
    12   1    -0.29   0.05  -0.03     0.07   0.00   0.01    -0.36   0.07  -0.05
    13   6     0.05  -0.06  -0.01     0.09  -0.05  -0.01    -0.08   0.02   0.00
    14   1    -0.26   0.13  -0.12    -0.38   0.11  -0.10     0.29  -0.03   0.04
    15   1    -0.20   0.30   0.05    -0.20   0.36   0.06     0.10  -0.23  -0.04
    16   1    -0.23   0.13   0.14    -0.33   0.11   0.13     0.25  -0.03  -0.05
                     25                     26                     27
                      A                      A                      A
 Frequencies --   1481.9149              1493.8585              1500.0645
 Red. masses --      1.1091                 1.0399                 1.0378
 Frc consts  --      1.4350                 1.3673                 1.3759
 IR Inten    --     14.8060                14.6218                10.7237
  Atom  AN      X      Y      Z        X      Y      Z        X      Y      Z
     1   7    -0.06   0.00   0.00     0.00   0.00   0.00    -0.01   0.00   0.00
     2   1     0.57   0.00   0.00     0.00   0.01   0.01     0.19   0.00   0.00
     3   6     0.03   0.02  -0.01     0.00   0.00   0.01    -0.01  -0.01  -0.01
     4   1     0.00  -0.02   0.01     0.01   0.00   0.01     0.03   0.16  -0.11
     5   1    -0.20   0.04   0.00    -0.02  -0.04  -0.02    -0.02   0.19   0.14
     6   6     0.00   0.00   0.03     0.00  -0.01   0.03    -0.01   0.03  -0.01
     7   1     0.01   0.04  -0.38     0.00   0.03  -0.49     0.10   0.17   0.14
     8   1    -0.25   0.04  -0.01    -0.32   0.14  -0.07     0.14  -0.35   0.23
     9   1     0.26  -0.09  -0.06     0.35  -0.04   0.00    -0.03  -0.28  -0.24
    10   6     0.03  -0.02   0.01     0.00   0.00   0.01    -0.01   0.01   0.01
    11   1    -0.20  -0.04   0.00     0.02  -0.04  -0.02    -0.02  -0.19  -0.14
    12   1     0.00   0.02  -0.01    -0.01   0.00   0.01     0.03  -0.16   0.11
    13   6     0.00   0.00  -0.03     0.00  -0.01   0.03    -0.01  -0.03   0.01
    14   1    -0.25  -0.04   0.01     0.32   0.14  -0.07     0.14   0.35  -0.23
    15   1     0.01  -0.04   0.38     0.00   0.03  -0.49     0.10  -0.17  -0.14
    16   1     0.26   0.09   0.06    -0.35  -0.04   0.00    -0.03   0.28   0.24
                     28                     29                     30
                      A                      A                      A
 Frequencies --   1504.0791              1509.2053              1521.2248
 Red. masses --      1.0391                 1.1485                 1.0859
 Frc consts  --      1.3850                 1.5413                 1.4806
 IR Inten    --      2.9164                 9.5859                 4.0167
  Atom  AN      X      Y      Z        X      Y      Z        X      Y      Z
     1   7     0.00   0.01   0.00    -0.07   0.00   0.00    -0.01   0.00   0.00
     2   1     0.00   0.02   0.01     0.61   0.00   0.00     0.07   0.00   0.00
     3   6     0.02   0.01   0.00     0.03   0.03  -0.04     0.01  -0.05  -0.01
     4   1    -0.04  -0.15   0.09    -0.02  -0.16   0.08    -0.04   0.34  -0.25
     5   1    -0.02  -0.13  -0.11    -0.16  -0.01  -0.07    -0.08   0.33   0.29
     6   6     0.01  -0.03   0.00     0.01  -0.01  -0.02     0.01  -0.02   0.00
     7   1    -0.12  -0.22   0.05    -0.05  -0.10   0.32    -0.06  -0.11   0.02
     8   1    -0.03   0.35  -0.23     0.17   0.03  -0.03    -0.02   0.18  -0.12
     9   1    -0.12   0.33   0.28    -0.28   0.12   0.08    -0.05   0.17   0.14
    10   6    -0.02   0.01   0.00     0.03  -0.03   0.04     0.01   0.05   0.01
    11   1     0.02  -0.13  -0.11    -0.16   0.01   0.07    -0.08  -0.33  -0.29
    12   1     0.04  -0.15   0.09    -0.02   0.16  -0.08    -0.04  -0.34   0.25
    13   6    -0.01  -0.03   0.00     0.01   0.01   0.02     0.01   0.02   0.00
    14   1     0.03   0.35  -0.23     0.17  -0.03   0.03    -0.02  -0.18   0.12
    15   1     0.12  -0.22   0.05    -0.05   0.10  -0.32    -0.06   0.11  -0.02
    16   1     0.12   0.33   0.28    -0.28  -0.12  -0.08    -0.05  -0.17  -0.14
                     31                     32                     33
                      A                      A                      A
 Frequencies --   1532.8395              2906.5304              2911.8738
 Red. masses --      1.0917                 1.0749                 1.0749
 Frc consts  --      1.5113                 5.3504                 5.3697
 IR Inten    --      1.8679                15.1265               187.5932
  Atom  AN      X      Y      Z        X      Y      Z        X      Y      Z
     1   7     0.00   0.01   0.01     0.00   0.00   0.00     0.00   0.00   0.00
     2   1     0.00  -0.01  -0.02     0.00   0.00   0.00     0.00   0.00   0.00
     3   6    -0.02   0.06   0.00     0.00  -0.03  -0.04     0.00  -0.03  -0.04
     4   1     0.10  -0.37   0.27    -0.01   0.38   0.59    -0.02   0.38   0.59
     5   1     0.10  -0.34  -0.31     0.00   0.03  -0.07     0.00   0.01  -0.04
     6   6     0.00   0.01   0.00     0.00   0.00   0.00     0.00   0.00   0.00
     7   1     0.04   0.08   0.01     0.01  -0.01   0.00     0.02  -0.02   0.00
     8   1     0.01  -0.12   0.08     0.00  -0.01  -0.02     0.00  -0.01  -0.02
     9   1     0.01  -0.11  -0.10     0.00   0.01  -0.01     0.00   0.01  -0.02
    10   6     0.02   0.06   0.00     0.00   0.03   0.04     0.00  -0.03  -0.04
    11   1    -0.10  -0.34  -0.31     0.00  -0.03   0.07     0.00   0.01  -0.04
    12   1    -0.10  -0.37   0.27    -0.01  -0.38  -0.59     0.02   0.38   0.59
    13   6     0.00   0.01   0.00     0.00   0.00   0.00     0.00   0.00   0.00
    14   1    -0.01  -0.12   0.08     0.00   0.01   0.02     0.00  -0.01  -0.02
    15   1    -0.04   0.08   0.01     0.01   0.01   0.00    -0.02  -0.02   0.00
    16   1    -0.01  -0.11  -0.10     0.00  -0.01   0.01     0.00   0.01  -0.02
                     34                     35                     36
                      A                      A                      A
 Frequencies --   3026.0666              3027.4782              3032.4973
 Red. masses --      1.0522                 1.0449                 1.0700
 Frc consts  --      5.6770                 5.6429                 5.7973
 IR Inten    --     21.8460                 4.9609                 9.1755
  Atom  AN      X      Y      Z        X      Y      Z        X      Y      Z
     1   7     0.00   0.00   0.00     0.00   0.00   0.00     0.00   0.00   0.00
     2   1     0.00   0.00   0.00     0.00  -0.01   0.01     0.01   0.00   0.00
     3   6     0.00   0.02  -0.02     0.00  -0.01   0.02     0.00   0.03  -0.04
     4   1     0.00   0.02   0.01     0.00   0.00   0.01     0.00   0.03   0.03
     5   1     0.00  -0.23   0.28     0.00   0.16  -0.20     0.00  -0.36   0.45
     6   6    -0.02  -0.02   0.01     0.02   0.03  -0.01     0.02   0.01   0.00
     7   1     0.22  -0.15   0.00    -0.25   0.17   0.01    -0.20   0.14   0.01
     8   1     0.00   0.13   0.21     0.00  -0.15  -0.25     0.00  -0.13  -0.20
     9   1     0.00   0.30  -0.38     0.00  -0.32   0.40     0.00  -0.13   0.16
    10   6     0.00  -0.02   0.02     0.00  -0.01   0.02     0.00  -0.03   0.04
    11   1     0.00   0.23  -0.28     0.00   0.16  -0.20     0.00   0.36  -0.45
    12   1     0.00  -0.02  -0.01     0.00   0.00   0.01     0.00  -0.03  -0.03
    13   6    -0.02   0.02  -0.01    -0.02   0.03  -0.01     0.02  -0.01   0.00
    14   1     0.00  -0.13  -0.21     0.00  -0.15  -0.25     0.00   0.13   0.20
    15   1     0.22   0.15   0.00     0.25   0.17   0.01    -0.20  -0.14  -0.01
    16   1     0.00  -0.30   0.38     0.00  -0.32   0.40     0.00   0.13  -0.16
                     37                     38                     39
                      A                      A                      A
 Frequencies --   3034.9112              3087.7483              3088.1440
 Red. masses --      1.0758                 1.0992                 1.0987
 Frc consts  --      5.8381                 6.1744                 6.1734
 IR Inten    --     66.3375                21.0482                71.3951
  Atom  AN      X      Y      Z        X      Y      Z        X      Y      Z
     1   7     0.00   0.00   0.00     0.00   0.00   0.00     0.00   0.00   0.00
     2   1     0.00   0.01  -0.02    -0.01   0.00   0.00     0.00   0.00  -0.01
     3   6     0.00   0.03  -0.04     0.00  -0.01   0.01     0.00   0.01  -0.01
     4   1     0.00   0.02   0.02     0.00  -0.01  -0.02     0.00   0.01   0.01
     5   1     0.01  -0.40   0.50     0.00   0.08  -0.10     0.00  -0.09   0.11
     6   6     0.01   0.00   0.01     0.03  -0.03   0.05    -0.03   0.03  -0.05
     7   1    -0.17   0.12   0.01    -0.37   0.24   0.03     0.37  -0.24  -0.03
     8   1     0.00  -0.10  -0.16     0.01  -0.15  -0.21    -0.01   0.15   0.21
     9   1     0.00  -0.07   0.08     0.01   0.29  -0.36    -0.01  -0.29   0.36
    10   6     0.00   0.03  -0.04     0.00   0.01  -0.01     0.00   0.01  -0.01
    11   1    -0.01  -0.40   0.50     0.00  -0.08   0.10     0.00  -0.09   0.11
    12   1     0.00   0.02   0.02     0.00   0.01   0.02     0.00   0.01   0.01
    13   6    -0.01   0.00   0.01     0.03   0.03  -0.05     0.03   0.03  -0.05
    14   1     0.00  -0.10  -0.16     0.01   0.15   0.21     0.01   0.15   0.21
    15   1     0.17   0.12   0.01    -0.37  -0.24  -0.03    -0.37  -0.24  -0.03
    16   1     0.00  -0.07   0.08     0.01  -0.29   0.36     0.01  -0.29   0.36
                     40                     41                     42
                      A                      A                      A
 Frequencies --   3106.4593              3106.5466              3487.0372
 Red. masses --      1.1026                 1.1025                 1.0735
 Frc consts  --      6.2690                 6.2687                 7.6909
 IR Inten    --      9.9423                49.3212                 0.4590
  Atom  AN      X      Y      Z        X      Y      Z        X      Y      Z
     1   7     0.00   0.00   0.00     0.00   0.00   0.00     0.00  -0.05   0.05
     2   1     0.00   0.00   0.00     0.00   0.00   0.00     0.00   0.71  -0.70
     3   6     0.00   0.00   0.00     0.00   0.00   0.00     0.00   0.00   0.00
     4   1     0.00   0.02   0.03     0.00  -0.02  -0.03     0.00   0.00   0.00
     5   1     0.00  -0.02   0.02     0.00   0.01  -0.01     0.00   0.01  -0.02
     6   6     0.03  -0.04  -0.04    -0.03   0.04   0.04     0.00   0.00   0.00
     7   1    -0.35   0.23   0.01     0.35  -0.23  -0.01     0.00   0.00   0.00
     8   1     0.01   0.30   0.47    -0.01  -0.30  -0.47     0.00   0.00   0.00
     9   1     0.01  -0.06   0.05    -0.01   0.06  -0.05     0.00   0.00   0.00
    10   6     0.00   0.00   0.00     0.00   0.00   0.00     0.00   0.00   0.00
    11   1     0.00   0.02  -0.02     0.00   0.01  -0.01     0.00   0.01  -0.02
    12   1     0.00  -0.02  -0.03     0.00  -0.02  -0.03     0.00   0.00   0.00
    13   6     0.03   0.04   0.04     0.03   0.04   0.04     0.00   0.00   0.00
    14   1     0.01  -0.30  -0.48     0.01  -0.30  -0.47     0.00   0.00   0.00
    15   1    -0.35  -0.23  -0.01    -0.35  -0.23  -0.01     0.00   0.00   0.00
    16   1     0.01   0.06  -0.05     0.01   0.06  -0.05     0.00   0.00   0.00

 -------------------
 - Thermochemistry -
 -------------------
 Temperature   298.150 Kelvin.  Pressure   1.00000 Atm.
 Atom     1 has atomic number  7 and mass  14.00307
 Atom     2 has atomic number  1 and mass   1.00783
 Atom     3 has atomic number  6 and mass  12.00000
 Atom     4 has atomic number  1 and mass   1.00783
 Atom     5 has atomic number  1 and mass   1.00783
 Atom     6 has atomic number  6 and mass  12.00000
 Atom     7 has atomic number  1 and mass   1.00783
 Atom     8 has atomic number  1 and mass   1.00783
 Atom     9 has atomic number  1 and mass   1.00783
 Atom    10 has atomic number  6 and mass  12.00000
 Atom    11 has atomic number  1 and mass   1.00783
 Atom    12 has atomic number  1 and mass   1.00783
 Atom    13 has atomic number  6 and mass  12.00000
 Atom    14 has atomic number  1 and mass   1.00783
 Atom    15 has atomic number  1 and mass   1.00783
 Atom    16 has atomic number  1 and mass   1.00783
 Molecular mass:    73.08915 amu.
 Principal axes and moments of inertia in atomic units:
                           1         2         3
     Eigenvalues --   101.39859 864.25663 917.02440
           X            1.00000   0.00000   0.00000
           Y            0.00000   0.99962  -0.02765
           Z            0.00000   0.02765   0.99962
 This molecule is an asymmetric top.
 Rotational symmetry number  1.
 Rotational temperatures (Kelvin)      0.85419     0.10022     0.09445
 Rotational constants (GHZ):          17.79848     2.08820     1.96804
 Zero-point vibrational energy     391047.4 (Joules/Mol)
                                   93.46258 (Kcal/Mol)
 Warning -- explicit consideration of   7 degrees of freedom as
           vibrations may cause significant error
 Vibrational temperatures:    154.61   162.36   266.06   366.20   367.45
          (Kelvin)            609.61   617.15  1085.15  1172.48  1197.28
                             1298.03  1353.37  1511.58  1532.45  1610.22
                             1655.52  1679.65  1769.34  1853.42  1898.87
                             1961.79  2022.93  2037.25  2059.62  2132.14
                             2149.33  2158.26  2164.03  2171.41  2188.70
                             2205.41  4181.84  4189.53  4353.83  4355.86
                             4363.08  4366.55  4442.58  4443.14  4469.50
                             4469.62  5017.06
 
 Zero-point correction=                           0.148942 (Hartree/Particle)
 Thermal correction to Energy=                    0.155876
 Thermal correction to Enthalpy=                  0.156821
 Thermal correction to Gibbs Free Energy=         0.118788
 Sum of electronic and zero-point Energies=           -213.727990
 Sum of electronic and thermal Energies=              -213.721056
 Sum of electronic and thermal Enthalpies=            -213.720112
 Sum of electronic and thermal Free Energies=         -213.758144
 
                     E (Thermal)             CV                S
                      KCal/Mol        Cal/Mol-Kelvin    Cal/Mol-Kelvin
 Total                   97.814             23.718             80.047
 Electronic               0.000              0.000              0.000
 Translational            0.889              2.981             38.784
 Rotational               0.889              2.981             25.889
 Vibrational             96.036             17.756             15.374
 Vibration     1          0.606              1.943              3.314
 Vibration     2          0.607              1.939              3.219
 Vibration     3          0.631              1.860              2.278
 Vibration     4          0.665              1.755              1.699
 Vibration     5          0.666              1.754              1.693
 Vibration     6          0.786              1.419              0.879
 Vibration     7          0.790              1.407              0.862
                       Q            Log10(Q)             Ln(Q)
 Total Bot       0.229897D-54        -54.638466       -125.809718
 Total V=0       0.741304D+14         13.869996         31.936846
 Vib (Bot)       0.922412D-67        -67.035075       -154.353964
 Vib (Bot)    1  0.190695D+01          0.280340          0.645507
 Vib (Bot)    2  0.181382D+01          0.258595          0.595436
 Vib (Bot)    3  0.108426D+01          0.035135          0.080901
 Vib (Bot)    4  0.765172D+00         -0.116241         -0.267655
 Vib (Bot)    5  0.762246D+00         -0.117905         -0.271486
 Vib (Bot)    6  0.413246D+00         -0.383792         -0.883713
 Vib (Bot)    7  0.406543D+00         -0.390893         -0.900065
 Vib (V=0)       0.297432D+02          1.473387          3.392600
 Vib (V=0)    1  0.247141D+01          0.392945          0.904790
 Vib (V=0)    2  0.238147D+01          0.376846          0.867720
 Vib (V=0)    3  0.169400D+01          0.228912          0.527090
 Vib (V=0)    4  0.141405D+01          0.150465          0.346458
 Vib (V=0)    5  0.141160D+01          0.149712          0.344725
 Vib (V=0)    6  0.114867D+01          0.060195          0.138604
 Vib (V=0)    7  0.114442D+01          0.058586          0.134898
 Electronic      0.100000D+01          0.000000          0.000000
 Translational   0.245604D+08          7.390235         17.016644
 Rotational      0.101479D+06          5.006374         11.527603
 ***** Axes restored to original set *****
 -------------------------------------------------------------------
 Center     Atomic                   Forces (Hartrees/Bohr)
 Number     Number              X              Y              Z
 -------------------------------------------------------------------
      1        7           0.000000046    0.000002459   -0.000001085
      2        1           0.000001754    0.000009201    0.000004841
      3        6          -0.000000413   -0.000004539    0.000000256
      4        1           0.000000638   -0.000009600    0.000008784
      5        1          -0.000002284   -0.000011269   -0.000006702
      6        6           0.000000169    0.000003385   -0.000000869
      7        1          -0.000000198   -0.000001965   -0.000000080
      8        1          -0.000000890    0.000008113   -0.000009400
      9        1           0.000002064    0.000010047    0.000006136
     10        6          -0.000000393   -0.000004534    0.000000256
     11        1          -0.000002278   -0.000011266   -0.000006705
     12        1           0.000000636   -0.000009612    0.000008779
     13        6           0.000000177    0.000003393   -0.000000874
     14        1          -0.000000891    0.000008120   -0.000009397
     15        1          -0.000000203   -0.000001966   -0.000000086
     16        1           0.000002066    0.000010033    0.000006147
 -------------------------------------------------------------------
 Cartesian Forces:  Max     0.000011269 RMS     0.000005556
 1\1\GINC-SRVMBFD\Freq\RB3LYP\TZVP\C4H11N1\JENS\12-Sep-2014\0\\# opt=(t
 ight,calcall) b3lyp tzvp\\Title Card Required\\0,1\N,-0.0383354399,0.5
 847237065,-0.3219126369\H,-0.1073013389,1.2612024267,-1.0762994847\C,1
 .3121523637,0.6077879026,0.2307483331\H,1.5310204629,1.5510200327,0.76
 24327866\H,1.3798497856,-0.1890099649,0.9782197085\C,2.3573732563,0.37
 93684384,-0.8535172611\H,3.3628703945,0.3696534326,-0.4277807277\H,2.1
 850614261,-0.5715382705,-1.3604220638\H,2.3253502506,1.1735918597,-1.6
 049557828\C,-1.0888810602,0.839911628,0.6584018037\H,-1.0434595313,0.0
 452672199,1.4098406923\H,-0.9333710113,1.7892689581,1.2013712194\C,-2.
 4650617751,0.8455852244,0.0054174589\H,-2.6564012194,-0.1034818343,-0.
 4980985498\H,-3.2473544407,1.0087074748,0.749581298\H,-2.5451786882,1.
 6444584259,-0.7374547427\\Version=EM64L-G09RevD.01\State=1-A\HF=-213.8
 769322\RMSD=2.466e-09\RMSF=5.556e-06\ZeroPoint=0.1489421\Thermal=0.155
 8763\Dipole=0.0499696,0.3380658,0.097054\DipoleDeriv=-0.8568305,0.0025
 916,0.0422742,0.0018276,-0.3864522,-0.2492764,0.0426889,-0.2449864,-0.
 4919614,0.1026545,0.0156704,0.0213049,0.0323067,0.0928181,0.1838412,0.
 0122749,0.0904377,0.1171736,0.6031617,0.062753,0.1004276,-0.031794,0.3
 725583,0.0860233,0.1854079,0.0696784,0.2715197,-0.1098105,-0.0037721,-
 0.0004254,-0.0990266,-0.185439,-0.1595247,-0.0837757,-0.1136844,-0.075
 6866,-0.0024629,-0.0116838,0.0288878,0.0078672,-0.067631,0.1170469,-0.
 026772,0.0969519,-0.0793722,-0.0079032,0.0260438,0.0558383,0.0072706,0
 .1122595,-0.0410662,0.0567622,-0.0202198,0.0710236,-0.1607322,0.012418
 2,-0.0376661,0.0022043,0.0731679,-0.0029359,-0.0827963,-0.0028374,0.01
 38874,0.0587812,-0.0548932,-0.0222283,-0.0023107,-0.0887869,-0.0935572
 ,0.0276303,-0.0704807,-0.0016224,0.0456973,0.037281,-0.0198266,0.00953
 13,-0.0686242,0.1285375,0.0330029,0.0900083,-0.0626868,0.4708889,-0.05
 84387,-0.1561982,0.0331278,0.3792346,0.1015473,-0.2395607,0.1346263,0.
 3971163,-0.0001298,0.0308628,-0.032973,0.0212205,-0.073057,0.1206088,0
 .0173085,0.0850721,-0.0762793,-0.0816625,-0.0567418,-0.0309547,0.01977
 94,-0.1920669,-0.1782187,0.0625637,-0.1188821,-0.0972068,-0.0396,-0.00
 35177,-0.0227077,0.0069477,0.115445,-0.0328693,-0.0191222,-0.0070725,0
 .0995352,0.0442776,0.0013132,-0.0133791,-0.0576101,-0.0887391,-0.08431
 36,-0.059796,-0.0717899,0.0128332,-0.0971212,0.0221828,0.0775958,0.033
 2335,0.0686296,-0.020701,0.1222718,-0.0254972,-0.0451853,0.0307916,-0.
 0220697,0.0100305,0.0154247,-0.0633169,0.124858,-0.0480883,0.1086757,-
 0.0530885\Polar=69.7552975,-1.4697548,53.2518098,-2.3535512,1.0106554,
 56.5541513\PG=C01 [X(C4H11N1)]\NImag=0\\0.49076644,-0.05119022,0.32341
 110,-0.00998004,-0.19291531,0.54617208,-0.05969246,0.01785429,-0.00898
 037,0.07142701,0.02560563,-0.19829197,0.21892214,-0.02389347,0.1955832
 5,-0.01318768,0.17540272,-0.22906630,0.01423481,-0.20166082,0.26058037
 ,-0.18074088,0.01598891,-0.03744721,-0.00580487,-0.00560185,-0.0039093
 6,0.45988262,-0.02512671,-0.06897475,0.00390253,0.02678631,-0.00326934
 ,0.01172418,-0.00041603,0.57116865,-0.04702865,0.01832787,-0.11973370,
 -0.02947026,-0.00441705,-0.01225968,-0.00210533,-0.03204343,0.54688052
 ,-0.02324338,-0.02766547,-0.02030547,0.00061154,-0.00034708,0.00096610
 ,-0.05424429,-0.03076407,-0.01580686,0.06829803,-0.00700405,0.00503882
 ,-0.00403381,-0.00044556,0.00136945,0.00008671,-0.02817232,-0.22114365
 ,-0.08502465,0.03834575,0.23815687,-0.01315752,-0.01320327,-0.00861071
 ,0.00008626,-0.00066918,0.00004783,-0.01399578,-0.08458218,-0.09734861
 ,0.02256224,0.10032575,0.10729908,-0.00900826,0.02405774,-0.02832099,-
 0.00638990,0.00138100,-0.00166607,-0.04813227,0.00449321,-0.00437225,0
 .00160154,-0.00324241,0.00362839,0.06139399,0.00307494,0.00350493,0.00
 025244,-0.00018827,0.00118948,-0.00132997,0.00865372,-0.18911450,0.124
 66893,0.00011700,-0.02318146,0.01798797,-0.01040636,0.20013018,-0.0059
 8756,0.01001194,-0.01376003,-0.00266390,0.00065542,0.00044180,-0.00820
 884,0.12042625,-0.15912493,0.00098270,-0.01050946,0.01052093,0.0126277
 8,-0.13568932,0.17817496,-0.03608202,0.00418164,0.02678392,0.00185652,
 0.00017459,0.00061035,-0.12364349,0.01147971,0.04914494,0.00381370,-0.
 00032434,-0.00206139,0.00050004,-0.00084457,0.00039822,0.52864548,0.00
 169318,0.00071940,0.00100658,0.00106262,0.00039101,-0.00098452,0.01113
 001,-0.08347980,-0.01307001,0.02103718,-0.00414668,-0.02181800,-0.0179
 2447,0.00483494,0.01697227,0.01259958,0.56377106,-0.00973201,0.0023462
 0,0.01232589,-0.00116916,-0.00020684,0.00179558,0.05922655,-0.01379006
 ,-0.14559283,0.01157329,-0.00159760,-0.01171457,0.01675533,-0.00467363
 ,-0.01659708,0.05034215,-0.00535705,0.51677487,-0.00318896,0.00070044,
 0.00584320,0.00040340,-0.00021398,0.00000779,-0.01841134,-0.00112002,-
 0.01227026,0.00068350,0.00072376,0.00018280,0.00059516,-0.00072671,0.0
 0002808,-0.26708459,0.00254888,-0.09462876,0.29183756,0.00027104,0.000
 42118,-0.00087446,-0.00057207,0.00009516,-0.00027235,0.00453885,-0.001
 84678,0.00291076,-0.00012252,-0.00018204,0.00017150,-0.00028943,0.0001
 0292,-0.00007481,0.00209938,-0.04687185,0.00012672,-0.00260273,0.04587
 373,0.00342112,-0.00044778,-0.00403345,0.00027143,-0.00041277,-0.00027
 981,0.02232911,0.00042814,0.01187895,-0.00082674,-0.00018511,0.0007607
 1,-0.00065942,0.00042100,0.00097410,-0.09703801,0.00028053,-0.08960820
 ,0.10353154,-0.00059174,0.09491666,0.00223898,-0.00011728,-0.00066270,
 -0.00012130,0.00030054,0.00007298,0.00332754,0.02179102,0.01153381,-0.
 00293975,0.00074870,0.00331520,0.00077456,-0.00032748,-0.00094289,-0.0
 5453976,-0.03950123,-0.02112902,-0.00369492,-0.02662294,-0.01254699,0.
 05573638,-0.00005892,0.00059974,0.00113019,-0.00002213,-0.00046505,-0.
 00028900,-0.00077336,-0.00418046,-0.00280055,0.00064667,0.00156346,-0.
 00072938,0.00032475,0.00096896,-0.00006465,-0.03773166,-0.24968798,-0.
 10423670,-0.00027235,0.00192892,0.00148578,0.04194703,0.26903584,-0.00
 109497,0.00117028,0.00174151,0.00012302,0.00003385,0.00000789,-0.00460
 274,-0.02328469,-0.01366641,0.00417613,-0.00041362,-0.00290540,-0.0009
 0850,0.00015310,0.00051081,-0.01961841,-0.10314933,-0.10161746,-0.0014
 5003,-0.01054669,-0.00631148,0.01926676,0.11584526,0.11072230,0.002492
 48,-0.00074083,0.00033854,-0.00051939,0.00050156,-0.00037914,-0.000246
 20,-0.01826232,0.01683962,0.00070400,0.00003452,-0.00113012,-0.0029057
 7,0.00082935,0.00337129,-0.04799199,0.00759681,-0.00749375,-0.00027381
 ,0.02292337,-0.02011838,-0.00050284,-0.00411899,0.00424615,0.04939554,
 -0.00072104,0.00038680,-0.00047834,-0.00080557,0.00016324,0.00056919,-
 0.00013226,0.00449068,-0.00429449,-0.00069043,0.00103522,0.00022786,0.
 00122389,0.00133865,-0.00106464,0.00750713,-0.18626111,0.12701254,0.00
 050463,-0.00024333,-0.00082282,0.00212547,-0.02006770,0.01977151,-0.00
 891917,0.19907592,-0.00162778,-0.00046052,0.00125695,0.00114060,-0.000
 20935,0.00046649,-0.00122536,0.01912938,-0.01875295,-0.00066920,-0.000
 31973,0.00063223,0.00391979,-0.00163604,-0.00249229,-0.00670261,0.1260
 5779,-0.16463930,-0.00041756,0.00899153,-0.00900573,0.00109906,-0.0106
 6384,0.01132739,0.00449012,-0.14054621,0.18083985,-0.14014228,0.006369
 90,0.04516388,0.00088755,0.00297847,0.00146777,-0.03665665,0.00970360,
 0.02375858,0.00444294,0.00101157,0.00188904,0.00182519,-0.00077320,0.0
 0106218,-0.00393533,-0.00003342,-0.00267272,-0.00030131,0.00029852,0.0
 0128302,-0.00032403,0.00018419,0.00001859,-0.00021500,-0.00016449,0.00
 013840,0.47130384,0.04036075,-0.07475537,-0.01644722,-0.02106718,0.000
 46490,0.01961239,-0.00461533,-0.00614832,-0.00343078,-0.00342084,0.001
 75124,0.00149968,0.00145723,0.00026253,-0.00053442,0.00052396,-0.00063
 575,0.00028821,0.00028024,0.00082580,-0.00010843,0.00001686,0.00029107
 ,0.00020304,-0.00001219,0.00017486,-0.00019672,0.00890622,0.56925939,0
 .05861253,0.00912903,-0.15455169,0.02250048,-0.01108490,-0.02268635,-0
 .00644594,-0.00306109,0.01191780,-0.00513696,0.00029876,-0.00000431,-0
 .00232899,0.00063551,0.00022131,-0.00359538,0.00010701,-0.00266946,-0.
 00147221,0.00023479,0.00106529,0.00042362,0.00021435,0.00004879,0.0002
 4250,-0.00036996,0.00014611,0.02357976,-0.03638366,0.53736851,-0.00230
 914,-0.01720027,0.02305103,-0.00421081,0.00005774,0.00306852,0.0018721
 8,-0.00179863,0.00174525,-0.00022734,0.00009359,-0.00019171,0.00003123
 ,0.00067599,-0.00059843,-0.00008476,0.00000379,0.00014536,-0.00000288,
 0.00008321,-0.00005598,0.00001918,-0.00001337,-0.00000501,-0.00000309,
 0.00013339,-0.00020626,-0.04869852,0.01082230,-0.01091020,0.05820688,-
 0.00157448,0.00788049,-0.00400127,0.00088503,0.00119328,-0.00201639,0.
 00058400,0.00044565,-0.00000092,0.00009217,-0.00048653,0.00005196,-0.0
 0067952,0.00020159,0.00007630,-0.00026001,0.00030452,-0.00041974,-0.00
 009454,-0.00003382,0.00008174,0.00003993,-0.00002314,-0.00003042,0.000
 15301,-0.00006789,-0.00009456,0.00849399,-0.18970566,0.12533918,-0.010
 53786,0.20018542,0.00362530,0.01631580,-0.02483471,0.00446908,0.000163
 99,-0.00174109,-0.00172854,0.00031448,-0.00000879,0.00032315,0.0000754
 8,0.00014588,0.00078676,-0.00029905,0.00060377,0.00017493,-0.00033503,
 0.00028599,0.00008717,-0.00006489,0.00002162,-0.00003520,0.00001419,-0
 .00004516,-0.00022489,-0.00005646,0.00020032,-0.00806810,0.11929510,-0
 .15796751,0.00411970,-0.13478847,0.18130681,-0.00517238,0.02390955,0.0
 1870882,0.00033859,0.00025273,-0.00102752,0.00537951,0.00315428,0.0032
 4719,0.00058197,-0.00190879,-0.00132385,-0.00025769,-0.00011699,-0.000
 15912,-0.00029115,-0.00017892,0.00000144,-0.00015071,-0.00012274,-0.00
 002713,0.00001957,-0.00020013,-0.00022656,0.00004153,0.00001874,-0.000
 01634,-0.05635116,-0.03236741,-0.01739026,0.00134761,0.00153072,0.0003
 5403,0.06413301,0.00740840,-0.00150952,-0.01068378,0.00063295,0.001209
 75,0.00009205,-0.00165134,0.00136427,-0.00005362,0.00202074,-0.0001104
 8,0.00046520,-0.00009323,-0.00044796,0.00015590,0.00032014,0.00045340,
 0.00035947,0.00018346,-0.00003376,-0.00004845,-0.00029014,0.00005005,0
 .00016532,-0.00006150,-0.00001303,0.00002171,-0.03501252,-0.22030761,-
 0.08361696,-0.00515313,-0.02313104,-0.01010399,0.03239297,0.23934673,0
 .00930273,-0.02487196,-0.02013337,-0.00030061,-0.00073391,0.00048048,-
 0.00357623,0.00084081,-0.00055391,0.00158337,0.00088404,0.00091580,0.0
 0034208,0.00003813,0.00013766,0.00024239,0.00031700,0.00031729,0.00020
 318,0.00008625,0.00001283,-0.00028660,0.00012940,0.00014063,-0.0000585
 9,-0.00002637,-0.00003220,-0.01917238,-0.08375986,-0.09607775,0.003159
 67,0.01778585,0.01072445,0.01458138,0.10222929,0.11027421,-0.03531120,
 0.00342000,-0.00859431,0.00168759,-0.00050703,-0.00077191,-0.00175657,
 -0.00007084,0.00321267,-0.00025225,-0.00004053,0.00003104,-0.00013300,
 0.00017771,-0.00007891,-0.00074401,0.00000004,-0.00095387,-0.00027324,
 0.00007674,0.00030204,0.00004192,0.00003275,0.00002465,0.00005487,-0.0
 0004685,0.00000796,-0.16455863,-0.00171850,-0.04394003,-0.00276610,0.0
 0053204,-0.00205481,-0.00630829,0.00001279,-0.00426265,0.49174243,0.00
 650637,0.00032050,0.00355626,-0.00154818,0.00071089,-0.00038296,0.0003
 6005,-0.00063665,-0.00065876,0.00042156,0.00042985,0.00022981,-0.00004
 005,0.00026689,-0.00030186,0.00031121,0.00072459,0.00013296,0.00009893
 ,-0.00005248,-0.00008003,-0.00008792,-0.00003088,0.00009718,0.00005393
 ,-0.00005381,-0.00006721,-0.00147723,-0.08060261,-0.00112083,0.0234365
 3,0.00073373,0.00989877,-0.02741673,0.00059969,-0.01280066,-0.00145557
 ,0.56683355,0.02759709,-0.00114027,0.01195397,0.00109071,-0.00030100,0
 .00164463,0.00235866,-0.00012979,-0.00484732,0.00029206,0.00039494,0.0
 0030194,-0.00007433,-0.00047563,0.00037187,0.00165595,-0.00006393,0.00
 113056,0.00047938,-0.00011241,-0.00046467,-0.00010267,-0.00004248,0.00
 002960,-0.00011700,0.00009783,0.00002302,-0.05396278,0.00020800,-0.107
 55486,-0.02157341,-0.00115709,-0.00922973,-0.01460371,0.00104736,-0.00
 633894,-0.04136910,0.00664814,0.55061534,0.00285450,0.00010722,0.00047
 178,-0.00024365,-0.00031359,-0.00004814,-0.00040641,0.00018007,-0.0002
 0092,0.00029914,0.00029136,0.00025922,0.00001729,-0.00005527,0.0000126
 3,0.00007547,0.00009887,0.00007907,0.00002999,0.00000317,-0.00001460,-
 0.00007160,0.00002729,0.00004797,-0.00000642,-0.00000107,-0.00000191,-
 0.00635884,-0.02866318,-0.01553961,0.00133998,0.00031125,0.00062091,-0
 .00545281,0.00039791,-0.00245383,-0.05390758,-0.03654172,-0.01856252,0
 .05775899,0.00005301,0.00056146,0.00098998,-0.00012271,-0.00039481,-0.
 00025727,0.00004021,0.00028998,0.00030179,0.00019256,-0.00004674,0.000
 00188,0.00000905,-0.00001608,0.00000560,-0.00006644,-0.00003966,-0.000
 04296,-0.00002485,0.00000748,0.00002160,-0.00001001,0.00002185,-0.0000
 0397,-0.00000333,-0.00000801,0.00000314,0.00006890,0.00070638,-0.00016
 640,-0.00037688,0.00096976,-0.00010060,0.00035720,0.00164885,-0.000076
 82,-0.03862548,-0.24989352,-0.10433654,0.04181163,0.26904304,0.0009018
 0,0.00092665,0.00116427,-0.00002664,0.00015981,0.00006000,0.00018920,0
 .00015889,0.00013225,0.00020395,0.00001531,-0.00004213,-0.00002354,-0.
 00001164,-0.00005032,-0.00002402,0.00006803,0.00000484,-0.00002787,-0.
 00001148,-0.00000571,-0.00001123,-0.00000489,0.00002982,0.00000860,0.0
 0000043,0.00000121,-0.00275079,-0.01431042,-0.00886687,0.00060600,-0.0
 0011682,-0.00005541,-0.00323728,0.00040884,-0.00047772,-0.01990259,-0.
 10365989,-0.10204408,0.02478498,0.11530109,0.10869247,-0.00633340,0.00
 029414,-0.00505601,0.00031570,0.00000580,-0.00027830,-0.00013378,-0.00
 005429,0.00192549,-0.00019100,-0.00016305,-0.00011371,-0.00000790,0.00
 010943,-0.00008373,-0.00057660,-0.00003681,-0.00045296,-0.00019240,0.0
 0004566,0.00016984,0.00004277,0.00002444,0.00000826,0.00003429,-0.0000
 2927,0.00001712,-0.01783651,0.00501918,0.02361581,0.00101737,0.0006541
 8,-0.00003506,0.00076192,-0.00092788,-0.00017851,-0.17907034,0.0269660
 4,0.12639247,0.00462941,0.00010590,-0.00464650,0.19585194,0.00063149,0
 .00045500,0.00016918,0.00038139,-0.00001744,-0.00041301,-0.00004516,0.
 00088980,-0.00003536,0.00017820,-0.00002898,0.00006398,-0.00010292,-0.
 00003550,-0.00001513,-0.00002119,-0.00002706,0.00000039,-0.00000187,0.
 00000257,0.00000377,-0.00001364,0.00000422,-0.00001220,0.00000500,0.00
 000945,0.00000218,-0.00058987,-0.00194984,0.00034500,0.00009664,-0.000
 07185,-0.00014474,0.00002225,-0.00003709,0.00017930,0.02741522,-0.0525
 0248,-0.02726544,0.02110048,-0.00279918,-0.01888113,-0.03082915,0.0522
 2852,-0.00258397,0.00025929,-0.00092283,-0.00055143,-0.00037086,-0.000
 07951,-0.00084461,0.00015396,0.00083376,0.00009758,0.00000191,0.000048
 34,0.00007821,0.00003252,0.00002832,-0.00027205,0.00000487,-0.00018673
 ,-0.00006874,0.00001837,0.00007426,0.00000045,0.00001115,-0.00001524,0
 .00000478,-0.00001989,-0.00000822,-0.01101060,0.00254794,0.01140717,0.
 00071772,0.00003464,0.00072667,0.00077467,-0.00004711,0.00053734,0.128
 80189,-0.02741741,-0.17199180,0.00935762,-0.00084259,-0.00990772,-0.13
 953363,0.02958722,0.18454748,0.00287195,0.00003024,-0.00101408,-0.0005
 4553,-0.00038104,0.00083980,-0.00028511,0.00002472,-0.00015303,0.00006
 165,0.00005179,0.00001988,0.00009579,-0.00019932,0.00024049,0.00008249
 ,-0.00009611,0.00010906,0.00002458,-0.00000749,-0.00002084,-0.00000671
 ,0.00000380,-0.00000533,-0.00005820,-0.00000311,0.00005396,-0.00308126
 ,0.02447788,-0.02221514,-0.00553180,-0.00012991,-0.00241444,0.00138049
 ,-0.00017962,0.00087460,-0.04844559,0.01041279,-0.00950079,-0.00055745
 ,-0.00340875,0.00395593,0.00168854,-0.01822687,0.01503212,0.05230617,0
 .00007061,0.00023217,-0.00049511,0.00106254,0.00006821,0.00011906,0.00
 011191,0.00014522,-0.00037974,-0.00004141,-0.00001835,-0.00002359,-0.0
 0016847,-0.00000557,-0.00004939,0.00005087,-0.00004901,0.00005809,0.00
 001673,0.00000631,-0.00002544,0.00000109,-0.00000890,0.00000140,0.0000
 2077,0.00004005,-0.00001155,0.00003536,0.00036899,-0.00049984,-0.00032
 303,0.00160549,-0.00018455,0.00067328,0.00091776,-0.00022049,0.0107975
 1,-0.18684726,0.12662830,0.00124556,-0.02005079,0.01995722,-0.00118433
 ,0.00387987,-0.00395401,-0.01236900,0.19971581,0.00091959,-0.00085066,
 0.00103211,-0.00075401,0.00013147,0.00058766,-0.00001359,-0.00018739,0
 .00024586,-0.00001534,0.00000109,-0.00004700,0.00021576,-0.00007431,0.
 00003912,-0.00004098,-0.00003623,-0.00000940,-0.00002772,0.00000891,0.
 00000464,0.00000542,0.00000117,0.00000240,-0.00001974,-0.00000017,0.00
 003714,-0.00072386,0.01151716,-0.01179621,-0.00307227,-0.00074400,-0.0
 0013310,0.00034424,-0.00039122,0.00007320,-0.01045207,0.12592650,-0.16
 359952,0.00118733,-0.01079794,0.01136510,-0.00175057,0.01641598,-0.015
 09129,0.01419781,-0.14092035,0.17728930\\-0.00000005,-0.00000246,0.000
 00108,-0.00000175,-0.00000920,-0.00000484,0.00000041,0.00000454,-0.000
 00026,-0.00000064,0.00000960,-0.00000878,0.00000228,0.00001127,0.00000
 670,-0.00000017,-0.00000338,0.00000087,0.00000020,0.00000196,0.0000000
 8,0.00000089,-0.00000811,0.00000940,-0.00000206,-0.00001005,-0.0000061
 4,0.00000039,0.00000453,-0.00000026,0.00000228,0.00001127,0.00000671,-
 0.00000064,0.00000961,-0.00000878,-0.00000018,-0.00000339,0.00000087,0
 .00000089,-0.00000812,0.00000940,0.00000020,0.00000197,0.00000009,-0.0
 0000207,-0.00001003,-0.00000615\\\@


 I do not feel obliged to believe that the same God who
 has endowed us with sense, reason, and intellect has
 intended us to forgo their use.
                   --Galileo Galilei
 Job cpu time:       0 days  0 hours 37 minutes  4.4 seconds.
 File lengths (MBytes):  RWF=     44 Int=      0 D2E=      0 Chk=      3 Scr=      1
 Normal termination of Gaussian 09 at Fri Sep 12 10:06:24 2014.
