# Supplementary material for: CO from CO2and fluctuating renewable energy via formic-acid derivatives
Source: Royal Society of Chemistry journal article supplement (doi:10.1039/c6gc01202g), 2016-01-01
Supplement: c6gc01202g4.log [file c6gc01202g4.log]

 Entering Gaussian System, Link 0=/opt/mbfd/g09//g09
 Input=Diethylformamide_opt_startvalue_M2.com
 Output=Diethylformamide_opt_startvalue_M2.log
 Initial command:
 /opt/mbfd/g09/l1.exe "/gaussianscratch/Gau-11028.inp" -scrdir="/gaussianscratch/"
 Entering Link 1 = /opt/mbfd/g09/l1.exe PID=     11032.
  
 Copyright (c) 1988,1990,1992,1993,1995,1998,2003,2009,2013,
            Gaussian, Inc.  All Rights Reserved.
  
 This is part of the Gaussian(R) 09 program.  It is based on
 the Gaussian(R) 03 system (copyright 2003, Gaussian, Inc.),
 the Gaussian(R) 98 system (copyright 1998, Gaussian, Inc.),
 the Gaussian(R) 94 system (copyright 1995, Gaussian, Inc.),
 the Gaussian 92(TM) system (copyright 1992, Gaussian, Inc.),
 the Gaussian 90(TM) system (copyright 1990, Gaussian, Inc.),
 the Gaussian 88(TM) system (copyright 1988, Gaussian, Inc.),
 the Gaussian 86(TM) system (copyright 1986, Carnegie Mellon
 University), and the Gaussian 82(TM) system (copyright 1983,
 Carnegie Mellon University). Gaussian is a federally registered
 trademark of Gaussian, Inc.
  
 This software contains proprietary and confidential information,
 including trade secrets, belonging to Gaussian, Inc.
  
 This software is provided under written license and may be
 used, copied, transmitted, or stored only in accord with that
 written license.
  
 The following legend is applicable only to US Government
 contracts under FAR:
  
                    RESTRICTED RIGHTS LEGEND
  
 Use, reproduction and disclosure by the US Government is
 subject to restrictions as set forth in subparagraphs (a)
 and (c) of the Commercial Computer Software - Restricted
 Rights clause in FAR 52.227-19.
  
 Gaussian, Inc.
 340 Quinnipiac St., Bldg. 40, Wallingford CT 06492
  
  
 ---------------------------------------------------------------
 Warning -- This program may not be used in any manner that
 competes with the business of Gaussian, Inc. or will provide
 assistance to any competitor of Gaussian, Inc.  The licensee
 of this program is prohibited from giving any competitor of
 Gaussian, Inc. access to this program.  By using this program,
 the user acknowledges that Gaussian, Inc. is engaged in the
 business of creating and licensing software in the field of
 computational chemistry and represents and warrants to the
 licensee that it is not a competitor of Gaussian, Inc. and that
 it will not use this program in any manner prohibited above.
 ---------------------------------------------------------------
  

 Cite this work as:
 Gaussian 09, Revision D.01,
 M. J. Frisch, G. W. Trucks, H. B. Schlegel, G. E. Scuseria, 
 M. A. Robb, J. R. Cheeseman, G. Scalmani, V. Barone, B. Mennucci, 
 G. A. Petersson, H. Nakatsuji, M. Caricato, X. Li, H. P. Hratchian, 
 A. F. Izmaylov, J. Bloino, G. Zheng, J. L. Sonnenberg, M. Hada, 
 M. Ehara, K. Toyota, R. Fukuda, J. Hasegawa, M. Ishida, T. Nakajima, 
 Y. Honda, O. Kitao, H. Nakai, T. Vreven, J. A. Montgomery, Jr., 
 J. E. Peralta, F. Ogliaro, M. Bearpark, J. J. Heyd, E. Brothers, 
 K. N. Kudin, V. N. Staroverov, T. Keith, R. Kobayashi, J. Normand, 
 K. Raghavachari, A. Rendell, J. C. Burant, S. S. Iyengar, J. Tomasi, 
 M. Cossi, N. Rega, J. M. Millam, M. Klene, J. E. Knox, J. B. Cross, 
 V. Bakken, C. Adamo, J. Jaramillo, R. Gomperts, R. E. Stratmann, 
 O. Yazyev, A. J. Austin, R. Cammi, C. Pomelli, J. W. Ochterski, 
 R. L. Martin, K. Morokuma, V. G. Zakrzewski, G. A. Voth, 
 P. Salvador, J. J. Dannenberg, S. Dapprich, A. D. Daniels, 
 O. Farkas, J. B. Foresman, J. V. Ortiz, J. Cioslowski, 
 and D. J. Fox, Gaussian, Inc., Wallingford CT, 2013.
 
 ******************************************
 Gaussian 09:  EM64L-G09RevD.01 24-Apr-2013
                20-Sep-2014 
 ******************************************
 %chk=DEF_opt_startvalue_M2.chk
 %mem=3000MB
 %nprocshared=3
 Will use up to    3 processors via shared memory.
 -------------------------------------------------------
 # opt=(calcall,tight) freq b3lyp geom=connectivity tzvp
 -------------------------------------------------------
 1/7=10,10=4,14=-1,18=20,19=15,26=3,38=1,57=2/1,3;
 2/9=110,12=2,17=6,18=5,40=1/2;
 3/5=19,7=101,11=2,16=1,25=1,30=1,71=2,74=-5,140=1/1,2,3;
 4//1;
 5/5=2,38=5/2;
 8/6=4,10=90,11=11/1;
 11/6=1,8=1,9=11,15=111,16=1/1,2,10;
 10/6=1/2;
 6/7=2,8=2,9=2,10=2,18=1,28=1/1;
 7/10=1,25=1/1,2,3,16;
 1/7=10,10=4,14=-1,18=20,19=15,26=3/3(3);
 2/9=110/2;
 7/8=1,9=1,25=1,44=-1/16;
 99//99;
 2/9=110/2;
 3/5=19,7=101,11=2,16=1,25=1,30=1,71=2,74=-5,140=1/1,2,3;
 4/5=5,16=3,69=1/1;
 5/5=2,38=5/2;
 8/6=4,10=90,11=11/1;
 11/6=1,8=1,9=11,15=111,16=1/1,2,10;
 10/6=1/2;
 7/10=1,25=1/1,2,3,16;
 1/7=10,10=4,14=-1,18=20,19=15,26=3/3(-8);
 2/9=110/2;
 6/7=2,8=2,9=2,10=2,18=1,19=2,28=1/1;
 7/8=1,9=1,25=1,44=-1/16;
 99//99;
 -------------------
 Title Card Required
 -------------------
 Symbolic Z-matrix:
 Charge =  0 Multiplicity = 1
 N                     0.06225   0.18655  -0.07285 
 C                    -0.63228  -0.89597   0.62687 
 H                     0.11334  -1.49324   1.15546 
 H                    -1.27944  -0.43536   1.37248 
 C                    -1.46094  -1.77677  -0.30831 
 H                    -1.93906  -2.58052   0.25624 
 H                    -2.24186  -1.18937  -0.79222 
 H                    -0.8416   -2.23456  -1.08293 
 C                     1.38461  -0.05774  -0.64075 
 H                     1.36251  -1.00662  -1.18469 
 H                     1.57437   0.72003  -1.38355 
 C                     2.51146  -0.06946   0.39242 
 H                     2.35857  -0.84161   1.14852 
 H                     3.46812  -0.26842  -0.09613 
 H                     2.58034   0.89355   0.90154 
 C                    -0.54866   1.39276  -0.20814 
 H                     0.06971   2.11577  -0.77072 
 O                    -1.64824   1.6822    0.22669 
 

 GradGradGradGradGradGradGradGradGradGradGradGradGradGradGradGradGradGrad
 Berny optimization.
 Initialization pass.
                           ----------------------------
                           !    Initial Parameters    !
                           ! (Angstroms and Degrees)  !
 --------------------------                            --------------------------
 ! Name  Definition              Value          Derivative Info.                !
 --------------------------------------------------------------------------------
 ! R1    R(1,2)                  1.4642         calculate D2E/DX2 analytically  !
 ! R2    R(1,9)                  1.4597         calculate D2E/DX2 analytically  !
 ! R3    R(1,16)                 1.3588         calculate D2E/DX2 analytically  !
 ! R4    R(2,3)                  1.0918         calculate D2E/DX2 analytically  !
 ! R5    R(2,4)                  1.0895         calculate D2E/DX2 analytically  !
 ! R6    R(2,5)                  1.5287         calculate D2E/DX2 analytically  !
 ! R7    R(5,6)                  1.0924         calculate D2E/DX2 analytically  !
 ! R8    R(5,7)                  1.0904         calculate D2E/DX2 analytically  !
 ! R9    R(5,8)                  1.0923         calculate D2E/DX2 analytically  !
 ! R10   R(9,10)                 1.0939         calculate D2E/DX2 analytically  !
 ! R11   R(9,11)                 1.0921         calculate D2E/DX2 analytically  !
 ! R12   R(9,12)                 1.5288         calculate D2E/DX2 analytically  !
 ! R13   R(12,13)                1.0915         calculate D2E/DX2 analytically  !
 ! R14   R(12,14)                1.0925         calculate D2E/DX2 analytically  !
 ! R15   R(12,15)                1.0915         calculate D2E/DX2 analytically  !
 ! R16   R(16,17)                1.1053         calculate D2E/DX2 analytically  !
 ! R17   R(16,18)                1.2173         calculate D2E/DX2 analytically  !
 ! A1    A(2,1,9)              119.465          calculate D2E/DX2 analytically  !
 ! A2    A(2,1,16)             119.3809         calculate D2E/DX2 analytically  !
 ! A3    A(9,1,16)             121.1375         calculate D2E/DX2 analytically  !
 ! A4    A(1,2,3)              108.1726         calculate D2E/DX2 analytically  !
 ! A5    A(1,2,4)              107.2326         calculate D2E/DX2 analytically  !
 ! A6    A(1,2,5)              113.0016         calculate D2E/DX2 analytically  !
 ! A7    A(3,2,4)              107.7942         calculate D2E/DX2 analytically  !
 ! A8    A(3,2,5)              110.5578         calculate D2E/DX2 analytically  !
 ! A9    A(4,2,5)              109.8931         calculate D2E/DX2 analytically  !
 ! A10   A(2,5,6)              110.1833         calculate D2E/DX2 analytically  !
 ! A11   A(2,5,7)              110.4442         calculate D2E/DX2 analytically  !
 ! A12   A(2,5,8)              111.588          calculate D2E/DX2 analytically  !
 ! A13   A(6,5,7)              108.1942         calculate D2E/DX2 analytically  !
 ! A14   A(6,5,8)              107.8363         calculate D2E/DX2 analytically  !
 ! A15   A(7,5,8)              108.4883         calculate D2E/DX2 analytically  !
 ! A16   A(1,9,10)             108.6812         calculate D2E/DX2 analytically  !
 ! A17   A(1,9,11)             107.6273         calculate D2E/DX2 analytically  !
 ! A18   A(1,9,12)             113.9583         calculate D2E/DX2 analytically  !
 ! A19   A(10,9,11)            106.4427         calculate D2E/DX2 analytically  !
 ! A20   A(10,9,12)            110.1365         calculate D2E/DX2 analytically  !
 ! A21   A(11,9,12)            109.6959         calculate D2E/DX2 analytically  !
 ! A22   A(9,12,13)            111.7358         calculate D2E/DX2 analytically  !
 ! A23   A(9,12,14)            110.1589         calculate D2E/DX2 analytically  !
 ! A24   A(9,12,15)            110.7914         calculate D2E/DX2 analytically  !
 ! A25   A(13,12,14)           107.6755         calculate D2E/DX2 analytically  !
 ! A26   A(13,12,15)           108.0523         calculate D2E/DX2 analytically  !
 ! A27   A(14,12,15)           108.3012         calculate D2E/DX2 analytically  !
 ! A28   A(1,16,17)            112.3226         calculate D2E/DX2 analytically  !
 ! A29   A(1,16,18)            125.5622         calculate D2E/DX2 analytically  !
 ! A30   A(17,16,18)           122.1152         calculate D2E/DX2 analytically  !
 ! D1    D(9,1,2,3)             35.2863         calculate D2E/DX2 analytically  !
 ! D2    D(9,1,2,4)            151.2993         calculate D2E/DX2 analytically  !
 ! D3    D(9,1,2,5)            -87.4555         calculate D2E/DX2 analytically  !
 ! D4    D(16,1,2,3)          -146.1771         calculate D2E/DX2 analytically  !
 ! D5    D(16,1,2,4)           -30.1641         calculate D2E/DX2 analytically  !
 ! D6    D(16,1,2,5)            91.0811         calculate D2E/DX2 analytically  !
 ! D7    D(2,1,9,10)            46.2062         calculate D2E/DX2 analytically  !
 ! D8    D(2,1,9,11)           161.1011         calculate D2E/DX2 analytically  !
 ! D9    D(2,1,9,12)           -77.0175         calculate D2E/DX2 analytically  !
 ! D10   D(16,1,9,10)         -132.3039         calculate D2E/DX2 analytically  !
 ! D11   D(16,1,9,11)          -17.4091         calculate D2E/DX2 analytically  !
 ! D12   D(16,1,9,12)          104.4723         calculate D2E/DX2 analytically  !
 ! D13   D(2,1,16,17)         -178.8689         calculate D2E/DX2 analytically  !
 ! D14   D(2,1,16,18)            1.1929         calculate D2E/DX2 analytically  !
 ! D15   D(9,1,16,17)           -0.3574         calculate D2E/DX2 analytically  !
 ! D16   D(9,1,16,18)          179.7044         calculate D2E/DX2 analytically  !
 ! D17   D(1,2,5,6)            178.69           calculate D2E/DX2 analytically  !
 ! D18   D(1,2,5,7)            -61.8339         calculate D2E/DX2 analytically  !
 ! D19   D(1,2,5,8)             58.9273         calculate D2E/DX2 analytically  !
 ! D20   D(3,2,5,6)             57.2862         calculate D2E/DX2 analytically  !
 ! D21   D(3,2,5,7)            176.7623         calculate D2E/DX2 analytically  !
 ! D22   D(3,2,5,8)            -62.4765         calculate D2E/DX2 analytically  !
 ! D23   D(4,2,5,6)            -61.5825         calculate D2E/DX2 analytically  !
 ! D24   D(4,2,5,7)             57.8936         calculate D2E/DX2 analytically  !
 ! D25   D(4,2,5,8)            178.6548         calculate D2E/DX2 analytically  !
 ! D26   D(1,9,12,13)           59.6916         calculate D2E/DX2 analytically  !
 ! D27   D(1,9,12,14)          179.332          calculate D2E/DX2 analytically  !
 ! D28   D(1,9,12,15)          -60.8534         calculate D2E/DX2 analytically  !
 ! D29   D(10,9,12,13)         -62.7373         calculate D2E/DX2 analytically  !
 ! D30   D(10,9,12,14)          56.9031         calculate D2E/DX2 analytically  !
 ! D31   D(10,9,12,15)         176.7177         calculate D2E/DX2 analytically  !
 ! D32   D(11,9,12,13)        -179.5757         calculate D2E/DX2 analytically  !
 ! D33   D(11,9,12,14)         -59.9354         calculate D2E/DX2 analytically  !
 ! D34   D(11,9,12,15)          59.8792         calculate D2E/DX2 analytically  !
 --------------------------------------------------------------------------------
 Trust Radius=3.00D-01 FncErr=1.00D-07 GrdErr=1.00D-06
 Number of steps in this run=     91 maximum allowed number of steps=    108.
 GradGradGradGradGradGradGradGradGradGradGradGradGradGradGradGradGradGrad

                          Input orientation:                          
 ---------------------------------------------------------------------
 Center     Atomic      Atomic             Coordinates (Angstroms)
 Number     Number       Type             X           Y           Z
 ---------------------------------------------------------------------
      1          7           0        0.062248    0.186551   -0.072854
      2          6           0       -0.632275   -0.895967    0.626865
      3          1           0        0.113338   -1.493237    1.155463
      4          1           0       -1.279437   -0.435355    1.372482
      5          6           0       -1.460937   -1.776773   -0.308313
      6          1           0       -1.939063   -2.580518    0.256242
      7          1           0       -2.241855   -1.189374   -0.792220
      8          1           0       -0.841601   -2.234557   -1.082926
      9          6           0        1.384610   -0.057743   -0.640751
     10          1           0        1.362511   -1.006615   -1.184689
     11          1           0        1.574369    0.720031   -1.383545
     12          6           0        2.511456   -0.069464    0.392415
     13          1           0        2.358570   -0.841612    1.148520
     14          1           0        3.468117   -0.268415   -0.096133
     15          1           0        2.580336    0.893553    0.901538
     16          6           0       -0.548658    1.392755   -0.208141
     17          1           0        0.069712    2.115770   -0.770719
     18          8           0       -1.648239    1.682203    0.226690
 ---------------------------------------------------------------------
                    Distance matrix (angstroms):
                    1          2          3          4          5
     1  N    0.000000
     2  C    1.464177   0.000000
     3  H    2.081600   1.091827   0.000000
     4  H    2.067821   1.089462   1.762394   0.000000
     5  C    2.496032   1.528744   2.168265   2.158105   0.000000
     6  H    3.430776   2.163971   2.490608   2.506556   1.092398
     7  H    2.778407   2.165788   3.071276   2.486107   1.090429
     8  H    2.774699   2.181519   2.543983   3.075363   1.092323
     9  C    1.459736   2.525331   2.627387   3.360483   3.341065
    10  H    2.085787   2.696876   2.696951   3.720934   3.055002
    11  H    2.070995   3.394477   3.671475   4.132168   4.074707
    12  C    2.506120   3.259006   2.891426   3.932592   4.380163
    13  H    2.796778   3.036484   2.337890   3.667465   4.193510
    14  H    3.436201   4.210672   3.784339   4.972320   5.159044
    15  H    2.791068   3.687641   3.441994   4.109213   4.992621
    16  C    1.358837   2.437719   3.259847   2.524756   3.299727
    17  H    2.051574   3.393610   4.091089   3.594684   4.208158
    18  O    2.291826   2.799872   3.748225   2.435756   3.505114
                    6          7          8          9         10
     6  H    0.000000
     7  H    1.768117   0.000000
     8  H    1.765639   1.771335   0.000000
     9  C    4.267996   3.801944   3.144846   0.000000
    10  H    3.931138   3.630274   2.525135   1.093945   0.000000
    11  H    5.091830   4.308023   3.828430   1.092101   1.750924
    12  C    5.111854   5.025089   4.255261   1.528840   2.164621
    13  H    4.721187   5.005129   4.142553   2.182782   2.542287
    14  H    5.891314   5.825503   4.838713   2.163791   2.482634
    15  H    5.736771   5.519142   5.043097   2.171032   3.073447
    16  C    4.235065   3.142524   3.742787   2.455325   3.219191
    17  H    5.210081   4.033334   4.455705   2.543621   3.404701
    18  O    4.272732   3.104273   4.207941   3.602505   4.276254
                   11         12         13         14         15
    11  H    0.000000
    12  C    2.157653   0.000000
    13  H    3.076533   1.091458   0.000000
    14  H    2.494140   1.092456   1.763182   0.000000
    15  H    2.502735   1.091491   1.766629   1.770218   0.000000
    16  C    2.518209   3.444278   3.909591   4.348162   3.357260
    17  H    2.141877   3.477103   4.203386   4.205777   3.254764
    18  O    3.728785   4.516510   4.824306   5.485091   4.354106
                   16         17         18
    16  C    0.000000
    17  H    1.105272   0.000000
    18  O    1.217348   2.033264   0.000000
 Stoichiometry    C5H11NO
 Framework group  C1[X(C5H11NO)]
 Deg. of freedom    48
 Full point group                 C1      NOp   1
 Largest Abelian subgroup         C1      NOp   1
 Largest concise Abelian subgroup C1      NOp   1
                         Standard orientation:                         
 ---------------------------------------------------------------------
 Center     Atomic      Atomic             Coordinates (Angstroms)
 Number     Number       Type             X           Y           Z
 ---------------------------------------------------------------------
      1          7           0        0.062248   -0.186551    0.072854
      2          6           0       -0.632275    0.895967   -0.626865
      3          1           0        0.113338    1.493237   -1.155463
      4          1           0       -1.279437    0.435355   -1.372482
      5          6           0       -1.460937    1.776773    0.308313
      6          1           0       -1.939063    2.580518   -0.256242
      7          1           0       -2.241855    1.189374    0.792220
      8          1           0       -0.841601    2.234557    1.082926
      9          6           0        1.384610    0.057743    0.640751
     10          1           0        1.362511    1.006615    1.184689
     11          1           0        1.574369   -0.720031    1.383545
     12          6           0        2.511456    0.069464   -0.392415
     13          1           0        2.358570    0.841612   -1.148520
     14          1           0        3.468117    0.268414    0.096133
     15          1           0        2.580336   -0.893553   -0.901538
     16          6           0       -0.548658   -1.392755    0.208141
     17          1           0        0.069712   -2.115770    0.770719
     18          8           0       -1.648239   -1.682203   -0.226690
 ---------------------------------------------------------------------
 Rotational constants (GHZ):      3.0861270      2.0860191      1.4214818
 Standard basis: TZVP (5D, 7F)
 There are   206 symmetry adapted cartesian basis functions of A   symmetry.
 There are   199 symmetry adapted basis functions of A   symmetry.
   199 basis functions,   333 primitive gaussians,   206 cartesian basis functions
    28 alpha electrons       28 beta electrons
       nuclear repulsion energy       318.8291164908 Hartrees.
 NAtoms=   18 NActive=   18 NUniq=   18 SFac= 1.00D+00 NAtFMM=   60 NAOKFM=F Big=F
 Integral buffers will be    131072 words long.
 Raffenetti 2 integral format.
 Two-electron integral symmetry is turned on.
 One-electron integrals computed using PRISM.
 NBasis=   199 RedAO= T EigKep=  2.85D-04  NBF=   199
 NBsUse=   199 1.00D-06 EigRej= -1.00D+00 NBFU=   199
 ExpMin= 9.52D-02 ExpMax= 2.70D+04 ExpMxC= 9.22D+02 IAcc=2 IRadAn=         4 AccDes= 0.00D+00
 Harris functional with IExCor=  402 and IRadAn=       4 diagonalized for initial guess.
 HarFok:  IExCor=  402 AccDes= 0.00D+00 IRadAn=         4 IDoV= 1 UseB2=F ITyADJ=14
 ICtDFT=  3500011 ScaDFX=  1.000000  1.000000  1.000000  1.000000
 FoFCou: FMM=F IPFlag=           0 FMFlag=      100000 FMFlg1=           0
         NFxFlg=           0 DoJE=T BraDBF=F KetDBF=T FulRan=T
         wScrn=  0.000000 ICntrl=     500 IOpCl=  0 I1Cent=   200000004 NGrid=           0
         NMat0=    1 NMatS0=      1 NMatT0=    0 NMatD0=    1 NMtDS0=    0 NMtDT0=    0
 Petite list used in FoFCou.
 Keep R1 ints in memory in canonical form, NReq=202598390.
 Requested convergence on RMS density matrix=1.00D-08 within 128 cycles.
 Requested convergence on MAX density matrix=1.00D-06.
 Requested convergence on             energy=1.00D-06.
 No special actions if energy rises.
 Integral accuracy reduced to 1.0D-05 until final iterations.
 Initial convergence to 1.0D-05 achieved.  Increase integral accuracy.
 SCF Done:  E(RB3LYP) =  -327.262585396     A.U. after   14 cycles
            NFock= 14  Conv=0.78D-08     -V/T= 2.0051
 DoSCS=F DFT=T ScalE2(SS,OS)=  1.000000  1.000000
 Range of M.O.s used for correlation:     1   199
 NBasis=   199 NAE=    28 NBE=    28 NFC=     0 NFV=     0
 NROrb=    199 NOA=    28 NOB=    28 NVA=   171 NVB=   171

 **** Warning!!: The largest alpha MO coefficient is  0.17251786D+02

 Symmetrizing basis deriv contribution to polar:
 IMax=3 JMax=2 DiffMx= 0.00D+00
 G2DrvN: will do    19 centers at a time, making    1 passes.
 Calling FoFCou, ICntrl=  3107 FMM=F I1Cent=   0 AccDes= 0.00D+00.
 End of G2Drv F.D. properties file   721 does not exist.
 End of G2Drv F.D. properties file   722 does not exist.
 End of G2Drv F.D. properties file   788 does not exist.
          IDoAtm=111111111111111111
          Differentiating once with respect to electric field.
                with respect to dipole field.
          Differentiating once with respect to nuclear coordinates.
 Keep R1 ints in memory in canonical form, NReq=202455622.
          There are    57 degrees of freedom in the 1st order CPHF.  IDoFFX=6 NUNeed=     3.
     54 vectors produced by pass  0 Test12= 8.40D-15 1.75D-09 XBig12= 5.65D+01 3.19D+00.
 AX will form    54 AO Fock derivatives at one time.
     54 vectors produced by pass  1 Test12= 8.40D-15 1.75D-09 XBig12= 1.37D+01 9.08D-01.
     54 vectors produced by pass  2 Test12= 8.40D-15 1.75D-09 XBig12= 8.06D-02 3.95D-02.
     54 vectors produced by pass  3 Test12= 8.40D-15 1.75D-09 XBig12= 3.20D-04 2.38D-03.
     54 vectors produced by pass  4 Test12= 8.40D-15 1.75D-09 XBig12= 6.30D-07 1.25D-04.
     31 vectors produced by pass  5 Test12= 8.40D-15 1.75D-09 XBig12= 6.21D-10 2.12D-06.
      4 vectors produced by pass  6 Test12= 8.40D-15 1.75D-09 XBig12= 5.93D-13 1.09D-07.
      1 vectors produced by pass  7 Test12= 8.40D-15 1.75D-09 XBig12= 1.46D-15 5.75D-09.
 InvSVY:  IOpt=1 It=  1 EMax= 1.15D-14
 Solved reduced A of dimension   306 with    57 vectors.
 Isotropic polarizability for W=    0.000000       71.59 Bohr**3.
 End of Minotr F.D. properties file   721 does not exist.
 End of Minotr F.D. properties file   722 does not exist.
 End of Minotr F.D. properties file   788 does not exist.

 **********************************************************************

            Population analysis using the SCF density.

 **********************************************************************

 Orbital symmetries:
       Occupied  (A) (A) (A) (A) (A) (A) (A) (A) (A) (A) (A) (A)
                 (A) (A) (A) (A) (A) (A) (A) (A) (A) (A) (A) (A)
                 (A) (A) (A) (A)
       Virtual   (A) (A) (A) (A) (A) (A) (A) (A) (A) (A) (A) (A)
                 (A) (A) (A) (A) (A) (A) (A) (A) (A) (A) (A) (A)
                 (A) (A) (A) (A) (A) (A) (A) (A) (A) (A) (A) (A)
                 (A) (A) (A) (A) (A) (A) (A) (A) (A) (A) (A) (A)
                 (A) (A) (A) (A) (A) (A) (A) (A) (A) (A) (A) (A)
                 (A) (A) (A) (A) (A) (A) (A) (A) (A) (A) (A) (A)
                 (A) (A) (A) (A) (A) (A) (A) (A) (A) (A) (A) (A)
                 (A) (A) (A) (A) (A) (A) (A) (A) (A) (A) (A) (A)
                 (A) (A) (A) (A) (A) (A) (A) (A) (A) (A) (A) (A)
                 (A) (A) (A) (A) (A) (A) (A) (A) (A) (A) (A) (A)
                 (A) (A) (A) (A) (A) (A) (A) (A) (A) (A) (A) (A)
                 (A) (A) (A) (A) (A) (A) (A) (A) (A) (A) (A) (A)
                 (A) (A) (A) (A) (A) (A) (A) (A) (A) (A) (A) (A)
                 (A) (A) (A) (A) (A) (A) (A) (A) (A) (A) (A) (A)
                 (A) (A) (A)
 The electronic state is 1-A.
 Alpha  occ. eigenvalues --  -19.09112 -14.35124 -10.26481 -10.22429 -10.21091
 Alpha  occ. eigenvalues --  -10.17901 -10.16894  -1.03826  -0.94640  -0.78469
 Alpha  occ. eigenvalues --   -0.75563  -0.66060  -0.65401  -0.56185  -0.52683
 Alpha  occ. eigenvalues --   -0.49247  -0.45847  -0.44726  -0.44138  -0.41726
 Alpha  occ. eigenvalues --   -0.40594  -0.39275  -0.38027  -0.37751  -0.36682
 Alpha  occ. eigenvalues --   -0.35631  -0.26033  -0.25091
 Alpha virt. eigenvalues --    0.01219   0.02284   0.04909   0.05944   0.07492
 Alpha virt. eigenvalues --    0.08380   0.09077   0.10574   0.11380   0.11462
 Alpha virt. eigenvalues --    0.12554   0.12817   0.13928   0.14750   0.15511
 Alpha virt. eigenvalues --    0.18591   0.19388   0.19555   0.20925   0.23374
 Alpha virt. eigenvalues --    0.23650   0.25685   0.26694   0.29502   0.30838
 Alpha virt. eigenvalues --    0.31791   0.33663   0.34252   0.37069   0.37470
 Alpha virt. eigenvalues --    0.39693   0.41259   0.41421   0.42006   0.42445
 Alpha virt. eigenvalues --    0.42988   0.43452   0.44405   0.45563   0.46961
 Alpha virt. eigenvalues --    0.47801   0.48734   0.50890   0.51736   0.52970
 Alpha virt. eigenvalues --    0.53963   0.55934   0.56863   0.59285   0.60857
 Alpha virt. eigenvalues --    0.63094   0.63416   0.65049   0.66918   0.74444
 Alpha virt. eigenvalues --    0.79566   0.86707   1.10568   1.15588   1.22106
 Alpha virt. eigenvalues --    1.25079   1.25292   1.26431   1.27222   1.27765
 Alpha virt. eigenvalues --    1.30273   1.30388   1.31792   1.32206   1.34774
 Alpha virt. eigenvalues --    1.35771   1.36278   1.38081   1.40650   1.42655
 Alpha virt. eigenvalues --    1.43848   1.46646   1.46860   1.50145   1.51304
 Alpha virt. eigenvalues --    1.52731   1.53605   1.55747   1.57780   1.60674
 Alpha virt. eigenvalues --    1.64538   1.66853   1.69412   1.70745   1.71965
 Alpha virt. eigenvalues --    1.73916   1.75096   1.77802   1.77955   1.79193
 Alpha virt. eigenvalues --    1.79415   1.80074   1.83137   1.84135   1.86177
 Alpha virt. eigenvalues --    1.89607   1.92621   1.94639   1.95796   1.97762
 Alpha virt. eigenvalues --    2.03889   2.04871   2.12498   2.14360   2.20189
 Alpha virt. eigenvalues --    2.22968   2.25445   2.26217   2.31413   2.32778
 Alpha virt. eigenvalues --    2.34846   2.35392   2.36494   2.37795   2.39779
 Alpha virt. eigenvalues --    2.42645   2.44265   2.47422   2.50870   2.51915
 Alpha virt. eigenvalues --    2.53376   2.55527   2.57310   2.58411   2.60540
 Alpha virt. eigenvalues --    2.63228   2.63635   2.64956   2.66752   2.67344
 Alpha virt. eigenvalues --    2.69479   2.71522   2.73512   2.75895   2.78742
 Alpha virt. eigenvalues --    2.81277   2.82932   2.89997   2.90968   2.95666
 Alpha virt. eigenvalues --    3.04152   3.09237   3.12882   3.14750   3.22167
 Alpha virt. eigenvalues --    3.23451   3.29225   3.31349   3.32857   3.33476
 Alpha virt. eigenvalues --    3.34111   3.35748   3.38390   3.42794   3.47031
 Alpha virt. eigenvalues --    3.49965   3.73736   3.76978   4.27816  21.91015
 Alpha virt. eigenvalues --   21.99811  22.03008  22.11391  22.13844  31.92062
 Alpha virt. eigenvalues --   43.51586
          Condensed to atoms (all electrons):
               1          2          3          4          5          6
     1  N    7.157428   0.147029  -0.053218  -0.041820  -0.029498   0.009657
     2  C    0.147029   5.042975   0.404605   0.419473   0.275397  -0.050985
     3  H   -0.053218   0.404605   0.611915  -0.028959  -0.067657   0.000979
     4  H   -0.041820   0.419473  -0.028959   0.521249  -0.045724  -0.000388
     5  C   -0.029498   0.275397  -0.067657  -0.045724   5.063260   0.404427
     6  H    0.009657  -0.050985   0.000979  -0.000388   0.404427   0.563156
     7  H   -0.007175  -0.037555   0.008431  -0.004465   0.404666  -0.022580
     8  H   -0.003538  -0.031013  -0.006092   0.007534   0.390870  -0.028166
     9  C    0.216531  -0.036030   0.002482   0.009362  -0.014722   0.000974
    10  H   -0.053268   0.004893  -0.006170  -0.000362   0.006814  -0.000796
    11  H   -0.041162   0.010377   0.000621  -0.000221  -0.001655   0.000033
    12  C   -0.076620  -0.022090   0.005721   0.000217  -0.002090   0.000225
    13  H   -0.002630  -0.000274   0.000827  -0.000235   0.000492  -0.000034
    14  H    0.010686   0.001450  -0.000731  -0.000046   0.000126  -0.000010
    15  H    0.006256  -0.000781  -0.000631  -0.000064   0.000217  -0.000010
    16  C    0.251522  -0.029804   0.012641  -0.015353  -0.019390   0.000535
    17  H   -0.155067   0.016802   0.000395   0.001691  -0.004161   0.000045
    18  O   -0.149859   0.021165   0.002289   0.019950  -0.017383  -0.000010
               7          8          9         10         11         12
     1  N   -0.007175  -0.003538   0.216531  -0.053268  -0.041162  -0.076620
     2  C   -0.037555  -0.031013  -0.036030   0.004893   0.010377  -0.022090
     3  H    0.008431  -0.006092   0.002482  -0.006170   0.000621   0.005721
     4  H   -0.004465   0.007534   0.009362  -0.000362  -0.000221   0.000217
     5  C    0.404666   0.390870  -0.014722   0.006814  -0.001655  -0.002090
     6  H   -0.022580  -0.028166   0.000974  -0.000796   0.000033   0.000225
     7  H    0.535421  -0.029121  -0.000130  -0.000064   0.000117  -0.000041
     8  H   -0.029121   0.596492   0.000418   0.000400   0.000021   0.000377
     9  C   -0.000130   0.000418   5.019759   0.428224   0.416940   0.247049
    10  H   -0.000064   0.000400   0.428224   0.601607  -0.033565  -0.087448
    11  H    0.000117   0.000021   0.416940  -0.033565   0.570264  -0.046811
    12  C   -0.000041   0.000377   0.247049  -0.087448  -0.046811   5.139026
    13  H   -0.000024   0.000101  -0.029246  -0.004628   0.007713   0.393815
    14  H    0.000001  -0.000034  -0.042244   0.004108  -0.002420   0.385168
    15  H    0.000001  -0.000024  -0.030986   0.010184  -0.006939   0.382629
    16  C    0.006393  -0.001143  -0.036403   0.003132  -0.011659  -0.004116
    17  H    0.000652   0.000018   0.001590   0.000346   0.011675  -0.006854
    18  O    0.005728   0.000234   0.005951  -0.000126   0.000285   0.000115
              13         14         15         16         17         18
     1  N   -0.002630   0.010686   0.006256   0.251522  -0.155067  -0.149859
     2  C   -0.000274   0.001450  -0.000781  -0.029804   0.016802   0.021165
     3  H    0.000827  -0.000731  -0.000631   0.012641   0.000395   0.002289
     4  H   -0.000235  -0.000046  -0.000064  -0.015353   0.001691   0.019950
     5  C    0.000492   0.000126   0.000217  -0.019390  -0.004161  -0.017383
     6  H   -0.000034  -0.000010  -0.000010   0.000535   0.000045  -0.000010
     7  H   -0.000024   0.000001   0.000001   0.006393   0.000652   0.005728
     8  H    0.000101  -0.000034  -0.000024  -0.001143   0.000018   0.000234
     9  C   -0.029246  -0.042244  -0.030986  -0.036403   0.001590   0.005951
    10  H   -0.004628   0.004108   0.010184   0.003132   0.000346  -0.000126
    11  H    0.007713  -0.002420  -0.006939  -0.011659   0.011675   0.000285
    12  C    0.393815   0.385168   0.382629  -0.004116  -0.006854   0.000115
    13  H    0.573319  -0.025614  -0.027311  -0.001213  -0.000003  -0.000020
    14  H   -0.025614   0.567026  -0.021225   0.000341   0.000143  -0.000004
    15  H   -0.027311  -0.021225   0.568178   0.001824   0.000647  -0.000386
    16  C   -0.001213   0.000341   0.001824   4.612634   0.416014   0.594070
    17  H   -0.000003   0.000143   0.000647   0.416014   0.727543  -0.055508
    18  O   -0.000020  -0.000004  -0.000386   0.594070  -0.055508   7.950687
 Mulliken charges:
               1
     1  N   -0.185254
     2  C   -0.135635
     3  H    0.112551
     4  H    0.158162
     5  C   -0.343989
     6  H    0.122948
     7  H    0.139746
     8  H    0.102665
     9  C   -0.159519
    10  H    0.126719
    11  H    0.126386
    12  C   -0.308272
    13  H    0.114964
    14  H    0.123279
    15  H    0.118423
    16  C    0.219973
    17  H    0.044033
    18  O   -0.377179
 Sum of Mulliken charges =   0.00000
 Mulliken charges with hydrogens summed into heavy atoms:
               1
     1  N   -0.185254
     2  C    0.135077
     5  C    0.021370
     9  C    0.093586
    12  C    0.048394
    16  C    0.264006
    18  O   -0.377179
 APT charges:
               1
     1  N   -0.797004
     2  C    0.334726
     3  H   -0.030069
     4  H    0.005811
     5  C    0.029613
     6  H   -0.019606
     7  H    0.004757
     8  H   -0.017048
     9  C    0.400422
    10  H   -0.043988
    11  H   -0.025210
    12  C    0.019617
    13  H   -0.005896
    14  H   -0.020697
    15  H   -0.009037
    16  C    1.031402
    17  H   -0.043702
    18  O   -0.814092
 Sum of APT charges =   0.00000
 APT charges with hydrogens summed into heavy atoms:
               1
     1  N   -0.797004
     2  C    0.310469
     5  C   -0.002283
     9  C    0.331224
    12  C   -0.016013
    16  C    0.987700
    18  O   -0.814092
 Electronic spatial extent (au):  <R**2>=            915.9232
 Charge=              0.0000 electrons
 Dipole moment (field-independent basis, Debye):
    X=              3.3548    Y=              2.4019    Z=              0.7905  Tot=              4.2010
 Quadrupole moment (field-independent basis, Debye-Ang):
   XX=            -48.3549   YY=            -47.1670   ZZ=            -44.1119
   XY=             -6.1097   XZ=              0.0986   YZ=             -2.2543
 Traceless Quadrupole moment (field-independent basis, Debye-Ang):
   XX=             -1.8103   YY=             -0.6224   ZZ=              2.4327
   XY=             -6.1097   XZ=              0.0986   YZ=             -2.2543
 Octapole moment (field-independent basis, Debye-Ang**2):
  XXX=              8.4168  YYY=              1.6272  ZZZ=             -0.6735  XYY=              9.3277
  XXY=             10.2715  XXZ=              2.6209  XZZ=             -1.1664  YZZ=             -1.6102
  YYZ=              1.9941  XYZ=              2.4112
 Hexadecapole moment (field-independent basis, Debye-Ang**3):
 XXXX=           -677.0447 YYYY=           -447.0919 ZZZZ=           -135.3395 XXXY=            -12.1861
 XXXZ=              4.5250 YYYX=            -14.2738 YYYZ=             -7.6842 ZZZX=              4.0447
 ZZZY=             -0.7888 XXYY=           -202.9853 XXZZ=           -132.2520 YYZZ=            -92.0620
 XXYZ=             -3.9238 YYXZ=             -0.3844 ZZXY=              2.5449
 N-N= 3.188291164908D+02 E-N=-1.399621739084D+03  KE= 3.256088601928D+02
  Exact polarizability:  80.419   2.885  74.902   3.429  -1.632  59.463
 Approx polarizability: 107.938  11.383 102.421   8.692  -1.456  84.713
 Calling FoFJK, ICntrl=    100127 FMM=F ISym2X=0 I1Cent= 0 IOpClX= 0 NMat=1 NMatS=1 NMatT=0.
 ***** Axes restored to original set *****
 -------------------------------------------------------------------
 Center     Atomic                   Forces (Hartrees/Bohr)
 Number     Number              X              Y              Z
 -------------------------------------------------------------------
      1        7           0.000110366    0.000139765    0.000208555
      2        6          -0.000072073   -0.000049250   -0.000146857
      3        1           0.000001235    0.000005653    0.000006984
      4        1           0.000000337    0.000003709    0.000001095
      5        6          -0.000000162   -0.000007774    0.000006223
      6        1           0.000005716   -0.000002592    0.000006541
      7        1           0.000002596   -0.000007338    0.000001565
      8        1           0.000004229   -0.000005374    0.000006581
      9        6          -0.000055049   -0.000252541   -0.000051554
     10        1          -0.000001232   -0.000001507    0.000006574
     11        1          -0.000000756   -0.000000977   -0.000002096
     12        6           0.000021541    0.000166923   -0.000019149
     13        1          -0.000000533    0.000007052    0.000003676
     14        1          -0.000001392    0.000004781    0.000001477
     15        1          -0.000003205    0.000006407   -0.000004287
     16        6          -0.000001909    0.000001048   -0.000007523
     17        1          -0.000006296   -0.000004334   -0.000009434
     18        8          -0.000003415   -0.000003650   -0.000008371
 -------------------------------------------------------------------
 Cartesian Forces:  Max     0.000252541 RMS     0.000061389
 FormGI is forming the generalized inverse of G from B-inverse, IUseBI=4.

 GradGradGradGradGradGradGradGradGradGradGradGradGradGradGradGradGradGrad
 Berny optimization.
 Internal  Forces:  Max     0.000153102 RMS     0.000028068
 Search for a local minimum.
 Step number   1 out of a maximum of   91
 All quantities printed in internal units (Hartrees-Bohrs-Radians)
 Mixed Optimization -- En-DIIS/RFO-DIIS
 Second derivative matrix not updated -- analytic derivatives used.
 ITU=  0
     Eigenvalues ---    0.00127   0.00199   0.00247   0.00269   0.00577
     Eigenvalues ---    0.01819   0.04271   0.04325   0.04380   0.04422
     Eigenvalues ---    0.04473   0.04502   0.04802   0.04973   0.08203
     Eigenvalues ---    0.08431   0.08535   0.11844   0.11961   0.12273
     Eigenvalues ---    0.12315   0.13276   0.13541   0.14767   0.16041
     Eigenvalues ---    0.16287   0.20272   0.20842   0.23183   0.23463
     Eigenvalues ---    0.25706   0.27958   0.28330   0.31388   0.32367
     Eigenvalues ---    0.32864   0.33202   0.33384   0.33480   0.33521
     Eigenvalues ---    0.33616   0.33903   0.34383   0.34457   0.35441
     Eigenvalues ---    0.36258   0.44645   0.81591
 RFO step:  Lambda=-9.25783660D-06 EMin= 1.27467265D-03
 Linear search not attempted -- first point.
 Iteration  1 RMS(Cart)=  0.01421410 RMS(Int)=  0.00008110
 Iteration  2 RMS(Cart)=  0.00010591 RMS(Int)=  0.00000030
 Iteration  3 RMS(Cart)=  0.00000000 RMS(Int)=  0.00000030
 Variable       Old X    -DE/DX   Delta X   Delta X   Delta X     New X
                                 (Linear)    (Quad)   (Total)
    R1        2.76689   0.00000   0.00000  -0.00002  -0.00002   2.76688
    R2        2.75850   0.00001   0.00000   0.00018   0.00018   2.75868
    R3        2.56783   0.00000   0.00000  -0.00026  -0.00026   2.56757
    R4        2.06325   0.00000   0.00000   0.00018   0.00018   2.06343
    R5        2.05878   0.00000   0.00000   0.00005   0.00005   2.05883
    R6        2.88891   0.00000   0.00000  -0.00005  -0.00005   2.88885
    R7        2.06433   0.00000   0.00000   0.00000   0.00000   2.06434
    R8        2.06061   0.00000   0.00000  -0.00002  -0.00002   2.06059
    R9        2.06419   0.00000   0.00000   0.00002   0.00002   2.06421
   R10        2.06726   0.00000   0.00000  -0.00034  -0.00034   2.06691
   R11        2.06377   0.00000   0.00000   0.00011   0.00011   2.06388
   R12        2.88909   0.00000   0.00000  -0.00001  -0.00001   2.88908
   R13        2.06256   0.00000   0.00000   0.00014   0.00014   2.06270
   R14        2.06444   0.00000   0.00000   0.00003   0.00003   2.06448
   R15        2.06262   0.00000   0.00000  -0.00004  -0.00004   2.06258
   R16        2.08866   0.00000   0.00000   0.00007   0.00007   2.08873
   R17        2.30045   0.00000   0.00000   0.00006   0.00006   2.30052
    A1        2.08506   0.00000   0.00000  -0.00065  -0.00065   2.08440
    A2        2.08359   0.00000   0.00000   0.00052   0.00052   2.08410
    A3        2.11425   0.00001   0.00000   0.00007   0.00007   2.11432
    A4        1.88797   0.00000   0.00000  -0.00050  -0.00050   1.88747
    A5        1.87156   0.00000   0.00000   0.00044   0.00044   1.87200
    A6        1.97225   0.00000   0.00000  -0.00003  -0.00003   1.97222
    A7        1.88136   0.00000   0.00000  -0.00012  -0.00012   1.88124
    A8        1.92960   0.00000   0.00000   0.00018   0.00018   1.92977
    A9        1.91800   0.00000   0.00000   0.00003   0.00003   1.91802
   A10        1.92306   0.00000   0.00000   0.00008   0.00008   1.92314
   A11        1.92762   0.00000   0.00000  -0.00014  -0.00014   1.92748
   A12        1.94758   0.00000   0.00000  -0.00010  -0.00010   1.94747
   A13        1.88835   0.00000   0.00000   0.00006   0.00006   1.88840
   A14        1.88210   0.00000   0.00000   0.00009   0.00009   1.88219
   A15        1.89348   0.00000   0.00000   0.00002   0.00002   1.89350
   A16        1.89685  -0.00001   0.00000  -0.00093  -0.00093   1.89592
   A17        1.87845   0.00000   0.00000   0.00102   0.00102   1.87947
   A18        1.98895   0.00000   0.00000  -0.00098  -0.00098   1.98797
   A19        1.85778   0.00000   0.00000  -0.00002  -0.00002   1.85775
   A20        1.92224   0.00007   0.00000   0.00091   0.00091   1.92315
   A21        1.91455  -0.00007   0.00000   0.00005   0.00005   1.91460
   A22        1.95016   0.00000   0.00000  -0.00095  -0.00095   1.94921
   A23        1.92264   0.00000   0.00000   0.00077   0.00077   1.92341
   A24        1.93367   0.00000   0.00000  -0.00021  -0.00021   1.93346
   A25        1.87929   0.00000   0.00000   0.00051   0.00051   1.87980
   A26        1.88587   0.00000   0.00000  -0.00015  -0.00015   1.88572
   A27        1.89021   0.00000   0.00000   0.00006   0.00006   1.89027
   A28        1.96040   0.00000   0.00000   0.00001   0.00001   1.96041
   A29        2.19147   0.00000   0.00000  -0.00002  -0.00002   2.19146
   A30        2.13131   0.00000   0.00000   0.00001   0.00001   2.13132
    D1        0.61586   0.00003   0.00000  -0.00225  -0.00225   0.61361
    D2        2.64067   0.00003   0.00000  -0.00241  -0.00241   2.63826
    D3       -1.52639   0.00003   0.00000  -0.00210  -0.00210  -1.52848
    D4       -2.55127  -0.00002   0.00000  -0.00495  -0.00495  -2.55622
    D5       -0.52646  -0.00003   0.00000  -0.00512  -0.00512  -0.53158
    D6        1.58966  -0.00002   0.00000  -0.00480  -0.00480   1.58486
    D7        0.80645  -0.00007   0.00000  -0.02251  -0.02250   0.78395
    D8        2.81174  -0.00007   0.00000  -0.02247  -0.02247   2.78927
    D9       -1.34421  -0.00015   0.00000  -0.02230  -0.02230  -1.36651
   D10       -2.30914  -0.00001   0.00000  -0.01976  -0.01976  -2.32890
   D11       -0.30385  -0.00001   0.00000  -0.01972  -0.01973  -0.32357
   D12        1.82339  -0.00010   0.00000  -0.01956  -0.01956   1.80383
   D13       -3.12185   0.00003   0.00000   0.00260   0.00260  -3.11925
   D14        0.02082   0.00003   0.00000   0.00263   0.00263   0.02345
   D15       -0.00624  -0.00003   0.00000  -0.00016  -0.00016  -0.00640
   D16        3.13643  -0.00003   0.00000  -0.00013  -0.00013   3.13630
   D17        3.11873   0.00000   0.00000  -0.00035  -0.00035   3.11838
   D18       -1.07920   0.00000   0.00000  -0.00031  -0.00031  -1.07952
   D19        1.02848   0.00000   0.00000  -0.00045  -0.00045   1.02803
   D20        0.99983   0.00000   0.00000   0.00019   0.00019   1.00002
   D21        3.08508   0.00000   0.00000   0.00022   0.00022   3.08531
   D22       -1.09042   0.00000   0.00000   0.00009   0.00009  -1.09033
   D23       -1.07482   0.00000   0.00000   0.00021   0.00021  -1.07461
   D24        1.01043   0.00000   0.00000   0.00025   0.00025   1.01068
   D25        3.11811   0.00000   0.00000   0.00011   0.00011   3.11823
   D26        1.04182   0.00003   0.00000  -0.00413  -0.00413   1.03769
   D27        3.12993   0.00003   0.00000  -0.00359  -0.00359   3.12635
   D28       -1.06209   0.00003   0.00000  -0.00315  -0.00315  -1.06525
   D29       -1.09497  -0.00001   0.00000  -0.00290  -0.00290  -1.09787
   D30        0.99315  -0.00002   0.00000  -0.00236  -0.00236   0.99079
   D31        3.08431  -0.00001   0.00000  -0.00193  -0.00193   3.08238
   D32       -3.13419  -0.00002   0.00000  -0.00343  -0.00343  -3.13762
   D33       -1.04607  -0.00002   0.00000  -0.00290  -0.00290  -1.04896
   D34        1.04509  -0.00002   0.00000  -0.00246  -0.00246   1.04263
         Item               Value     Threshold  Converged?
 Maximum Force            0.000153     0.000015     NO 
 RMS     Force            0.000028     0.000010     NO 
 Maximum Displacement     0.049938     0.000060     NO 
 RMS     Displacement     0.014210     0.000040     NO 
 Predicted change in Energy=-4.642218D-06
 GradGradGradGradGradGradGradGradGradGradGradGradGradGradGradGradGradGrad

                          Input orientation:                          
 ---------------------------------------------------------------------
 Center     Atomic      Atomic             Coordinates (Angstroms)
 Number     Number       Type             X           Y           Z
 ---------------------------------------------------------------------
      1          7           0        0.064139    0.180990   -0.069113
      2          6           0       -0.634078   -0.902791    0.624932
      3          1           0        0.110188   -1.506538    1.148235
      4          1           0       -1.277857   -0.444437    1.374895
      5          6           0       -1.468203   -1.773914   -0.314404
      6          1           0       -1.948770   -2.579307    0.245714
      7          1           0       -2.247403   -1.179918   -0.792968
      8          1           0       -0.852172   -2.229150   -1.093157
      9          6           0        1.385632   -0.065814   -0.638188
     10          1           0        1.365058   -1.022979   -1.167081
     11          1           0        1.569994    0.700957   -1.393758
     12          6           0        2.515287   -0.056385    0.391922
     13          1           0        2.365105   -0.815186    1.162059
     14          1           0        3.471503   -0.261785   -0.094868
     15          1           0        2.582799    0.915686    0.883683
     16          6           0       -0.543237    1.389196   -0.201024
     17          1           0        0.077092    2.111929   -0.761874
     18          8           0       -1.641876    1.680679    0.234918
 ---------------------------------------------------------------------
                    Distance matrix (angstroms):
                    1          2          3          4          5
     1  N    0.000000
     2  C    1.464168   0.000000
     3  H    2.081299   1.091920   0.000000
     4  H    2.068157   1.089488   1.762413   0.000000
     5  C    2.495974   1.528715   2.168438   2.158118   0.000000
     6  H    3.430767   2.164008   2.490921   2.506561   1.092400
     7  H    2.778357   2.165654   3.071350   2.486078   1.090416
     8  H    2.774359   2.181427   2.544041   3.075336   1.092332
     9  C    1.459829   2.524922   2.625595   3.360064   3.341678
    10  H    2.085058   2.687434   2.677540   3.712324   3.052593
    11  H    2.071871   3.391909   3.669577   4.133718   4.064557
    12  C    2.505399   3.269434   2.908514   3.937609   4.395110
    13  H    2.793312   3.048160   2.358561   3.667959   4.218217
    14  H    3.436108   4.217202   3.793831   4.974935   5.170630
    15  H    2.791280   3.704337   3.471450   4.122607   5.007991
    16  C    1.358701   2.437962   3.260788   2.526934   3.297526
    17  H    2.051490   3.393748   4.091810   3.596759   4.205703
    18  O    2.291722   2.800372   3.749964   2.438889   3.502304
                    6          7          8          9         10
     6  H    0.000000
     7  H    1.768144   0.000000
     8  H    1.765705   1.771347   0.000000
     9  C    4.268158   3.803173   3.145598   0.000000
    10  H    3.924233   3.635170   2.525158   1.093763   0.000000
    11  H    5.082293   4.297809   3.813499   1.092159   1.750810
    12  C    5.129749   5.034830   4.273891   1.528835   2.165138
    13  H    4.749877   5.022987   4.175664   2.182159   2.543259
    14  H    5.904766   5.834055   4.853995   2.164361   2.483177
    15  H    5.758221   5.525719   5.059340   2.170862   3.073589
    16  C    4.233688   3.139256   3.739488   2.455341   3.223886
    17  H    5.208363   4.029950   4.451769   2.543647   3.413311
    18  O    4.271041   3.099392   4.204067   3.602548   4.279839
                   11         12         13         14         15
    11  H    0.000000
    12  C    2.157730   0.000000
    13  H    3.076214   1.091533   0.000000
    14  H    2.495941   1.092475   1.763585   0.000000
    15  H    2.501723   1.091471   1.766579   1.770252   0.000000
    16  C    2.522307   3.434510   3.895606   4.342251   3.342589
    17  H    2.149157   3.460871   4.183841   4.195407   3.227603
    18  O    3.732097   4.508220   4.810907   5.479833   4.342118
                   16         17         18
    16  C    0.000000
    17  H    1.105307   0.000000
    18  O    1.217380   2.033327   0.000000
 Stoichiometry    C5H11NO
 Framework group  C1[X(C5H11NO)]
 Deg. of freedom    48
 Full point group                 C1      NOp   1
 Largest Abelian subgroup         C1      NOp   1
 Largest concise Abelian subgroup C1      NOp   1
                         Standard orientation:                         
 ---------------------------------------------------------------------
 Center     Atomic      Atomic             Coordinates (Angstroms)
 Number     Number       Type             X           Y           Z
 ---------------------------------------------------------------------
      1          7           0        0.065030   -0.180880    0.071709
      2          6           0       -0.645032    0.891069   -0.628666
      3          1           0        0.092578    1.499919   -1.155469
      4          1           0       -1.283655    0.421276   -1.375955
      5          6           0       -1.488790    1.758412    0.305550
      6          1           0       -1.978158    2.555176   -0.259271
      7          1           0       -2.261436    1.158666    0.787557
      8          1           0       -0.877882    2.224949    1.081646
      9          6           0        1.383673    0.083795    0.639362
     10          1           0        1.352503    1.043746    1.162658
     11          1           0        1.576411   -0.676473    1.399399
     12          6           0        2.513452    0.080807   -0.390651
     13          1           0        2.354981    0.833397   -1.165208
     14          1           0        3.467303    0.299573    0.094953
     15          1           0        2.591718   -0.893315   -0.876727
     16          6           0       -0.529002   -1.394917    0.210657
     17          1           0        0.099207   -2.107481    0.775731
     18          8           0       -1.624323   -1.701034   -0.223599
 ---------------------------------------------------------------------
 Rotational constants (GHZ):      3.0871982      2.0855282      1.4211047
 Standard basis: TZVP (5D, 7F)
 There are   206 symmetry adapted cartesian basis functions of A   symmetry.
 There are   199 symmetry adapted basis functions of A   symmetry.
   199 basis functions,   333 primitive gaussians,   206 cartesian basis functions
    28 alpha electrons       28 beta electrons
       nuclear repulsion energy       318.8217572131 Hartrees.
 NAtoms=   18 NActive=   18 NUniq=   18 SFac= 1.00D+00 NAtFMM=   60 NAOKFM=F Big=F
 Integral buffers will be    131072 words long.
 Raffenetti 2 integral format.
 Two-electron integral symmetry is turned on.
 One-electron integrals computed using PRISM.
 NBasis=   199 RedAO= T EigKep=  2.86D-04  NBF=   199
 NBsUse=   199 1.00D-06 EigRej= -1.00D+00 NBFU=   199
 Initial guess from the checkpoint file:  "DEF_opt_startvalue_M2.chk"
 B after Tr=     0.000000    0.000000    0.000000
         Rot=    0.999982    0.001995    0.000243   -0.005635 Ang=   0.69 deg.
 ExpMin= 9.52D-02 ExpMax= 2.70D+04 ExpMxC= 9.22D+02 IAcc=2 IRadAn=         4 AccDes= 0.00D+00
 Harris functional with IExCor=  402 and IRadAn=       4 diagonalized for initial guess.
 HarFok:  IExCor=  402 AccDes= 0.00D+00 IRadAn=         4 IDoV= 1 UseB2=F ITyADJ=14
 ICtDFT=  3500011 ScaDFX=  1.000000  1.000000  1.000000  1.000000
 FoFCou: FMM=F IPFlag=           0 FMFlag=      100000 FMFlg1=           0
         NFxFlg=           0 DoJE=T BraDBF=F KetDBF=T FulRan=T
         wScrn=  0.000000 ICntrl=     500 IOpCl=  0 I1Cent=   200000004 NGrid=           0
         NMat0=    1 NMatS0=      1 NMatT0=    0 NMatD0=    1 NMtDS0=    0 NMtDT0=    0
 Petite list used in FoFCou.
 Keep R1 ints in memory in canonical form, NReq=202598390.
 Requested convergence on RMS density matrix=1.00D-08 within 128 cycles.
 Requested convergence on MAX density matrix=1.00D-06.
 Requested convergence on             energy=1.00D-06.
 No special actions if energy rises.
 Integral accuracy reduced to 1.0D-05 until final iterations.
 Initial convergence to 1.0D-05 achieved.  Increase integral accuracy.
 SCF Done:  E(RB3LYP) =  -327.262589111     A.U. after    9 cycles
            NFock=  9  Conv=0.89D-08     -V/T= 2.0051
 DoSCS=F DFT=T ScalE2(SS,OS)=  1.000000  1.000000
 Range of M.O.s used for correlation:     1   199
 NBasis=   199 NAE=    28 NBE=    28 NFC=     0 NFV=     0
 NROrb=    199 NOA=    28 NOB=    28 NVA=   171 NVB=   171

 **** Warning!!: The largest alpha MO coefficient is  0.17113103D+02

 Symmetrizing basis deriv contribution to polar:
 IMax=3 JMax=2 DiffMx= 0.00D+00
 G2DrvN: will do    19 centers at a time, making    1 passes.
 Calling FoFCou, ICntrl=  3107 FMM=F I1Cent=   0 AccDes= 0.00D+00.
 End of G2Drv F.D. properties file   721 does not exist.
 End of G2Drv F.D. properties file   722 does not exist.
 End of G2Drv F.D. properties file   788 does not exist.
          IDoAtm=111111111111111111
          Differentiating once with respect to electric field.
                with respect to dipole field.
          Differentiating once with respect to nuclear coordinates.
 Keep R1 ints in memory in canonical form, NReq=202455622.
          There are    57 degrees of freedom in the 1st order CPHF.  IDoFFX=6 NUNeed=     3.
     54 vectors produced by pass  0 Test12= 8.40D-15 1.75D-09 XBig12= 5.62D+01 3.21D+00.
 AX will form    54 AO Fock derivatives at one time.
     54 vectors produced by pass  1 Test12= 8.40D-15 1.75D-09 XBig12= 1.35D+01 8.97D-01.
     54 vectors produced by pass  2 Test12= 8.40D-15 1.75D-09 XBig12= 7.93D-02 3.89D-02.
     54 vectors produced by pass  3 Test12= 8.40D-15 1.75D-09 XBig12= 3.14D-04 2.35D-03.
     54 vectors produced by pass  4 Test12= 8.40D-15 1.75D-09 XBig12= 6.17D-07 1.22D-04.
     31 vectors produced by pass  5 Test12= 8.40D-15 1.75D-09 XBig12= 6.12D-10 2.21D-06.
      4 vectors produced by pass  6 Test12= 8.40D-15 1.75D-09 XBig12= 5.82D-13 1.06D-07.
      2 vectors produced by pass  7 Test12= 8.40D-15 1.75D-09 XBig12= 1.39D-15 5.51D-09.
 InvSVY:  IOpt=1 It=  1 EMax= 2.66D-15
 Solved reduced A of dimension   307 with    57 vectors.
 Isotropic polarizability for W=    0.000000       71.59 Bohr**3.
 End of Minotr F.D. properties file   721 does not exist.
 End of Minotr F.D. properties file   722 does not exist.
 End of Minotr F.D. properties file   788 does not exist.
 Calling FoFJK, ICntrl=    100127 FMM=F ISym2X=0 I1Cent= 0 IOpClX= 0 NMat=1 NMatS=1 NMatT=0.
 ***** Axes restored to original set *****
 -------------------------------------------------------------------
 Center     Atomic                   Forces (Hartrees/Bohr)
 Number     Number              X              Y              Z
 -------------------------------------------------------------------
      1        7           0.000007973   -0.000013121    0.000002592
      2        6          -0.000013536    0.000005154    0.000023257
      3        1           0.000000816    0.000002712    0.000005118
      4        1          -0.000002712    0.000005023   -0.000010136
      5        6           0.000003607   -0.000007145   -0.000000312
      6        1           0.000003860   -0.000004090    0.000007850
      7        1           0.000000105   -0.000005199    0.000005117
      8        1           0.000005743   -0.000005128   -0.000000480
      9        6           0.000005185    0.000006204   -0.000017023
     10        1          -0.000009158    0.000003535    0.000012096
     11        1           0.000000709   -0.000006726    0.000000802
     12        6           0.000005772    0.000003601    0.000001886
     13        1          -0.000001129    0.000007479   -0.000001856
     14        1          -0.000000759    0.000005249    0.000001979
     15        1          -0.000004185    0.000008166   -0.000003830
     16        6           0.000002303   -0.000005046   -0.000005178
     17        1          -0.000000280   -0.000000432   -0.000011347
     18        8          -0.000004313   -0.000000234   -0.000010536
 -------------------------------------------------------------------
 Cartesian Forces:  Max     0.000023257 RMS     0.000006985
 FormGI is forming the generalized inverse of G from B-inverse, IUseBI=4.

 GradGradGradGradGradGradGradGradGradGradGradGradGradGradGradGradGradGrad
 Berny optimization.
 Using GEDIIS/GDIIS optimizer.
 Internal  Forces:  Max     0.000016454 RMS     0.000004414
 Search for a local minimum.
 Step number   2 out of a maximum of   91
 All quantities printed in internal units (Hartrees-Bohrs-Radians)
 Mixed Optimization -- En-DIIS/RFO-DIIS
 Swapping is turned off.
 Second derivative matrix not updated -- analytic derivatives used.
 DE= -3.72D-06 DEPred=-4.64D-06 R= 8.00D-01
 TightC=F SS=  1.41D+00  RLast= 5.35D-02 DXNew= 5.0454D-01 1.6058D-01
 Trust test= 8.00D-01 RLast= 5.35D-02 DXMaxT set to 3.00D-01
 ITU=  1  0
     Eigenvalues ---    0.00137   0.00214   0.00253   0.00268   0.00568
     Eigenvalues ---    0.01815   0.04272   0.04323   0.04383   0.04423
     Eigenvalues ---    0.04471   0.04499   0.04803   0.04969   0.08202
     Eigenvalues ---    0.08426   0.08531   0.11848   0.11961   0.12272
     Eigenvalues ---    0.12317   0.13269   0.13525   0.14761   0.16046
     Eigenvalues ---    0.16269   0.20207   0.20771   0.23178   0.23400
     Eigenvalues ---    0.25650   0.27950   0.28306   0.31380   0.32418
     Eigenvalues ---    0.32831   0.33185   0.33378   0.33474   0.33518
     Eigenvalues ---    0.33610   0.33887   0.34371   0.34457   0.35430
     Eigenvalues ---    0.36213   0.44640   0.81581
 En-DIIS/RFO-DIIS IScMMF=        0 using points:     2    1
 RFO step:  Lambda=-5.69029581D-09.
 DidBck=F Rises=F RFO-DIIS coefs:    1.00382   -0.00382
 Iteration  1 RMS(Cart)=  0.00147303 RMS(Int)=  0.00000086
 Iteration  2 RMS(Cart)=  0.00000124 RMS(Int)=  0.00000001
 Iteration  3 RMS(Cart)=  0.00000000 RMS(Int)=  0.00000001
 Variable       Old X    -DE/DX   Delta X   Delta X   Delta X     New X
                                 (Linear)    (Quad)   (Total)
    R1        2.76688   0.00001   0.00000   0.00001   0.00001   2.76688
    R2        2.75868   0.00000   0.00000   0.00001   0.00001   2.75869
    R3        2.56757   0.00000   0.00000   0.00003   0.00003   2.56760
    R4        2.06343   0.00000   0.00000   0.00003   0.00003   2.06346
    R5        2.05883   0.00000   0.00000  -0.00004  -0.00004   2.05879
    R6        2.88885   0.00001   0.00000   0.00003   0.00003   2.88889
    R7        2.06434   0.00000   0.00000   0.00000   0.00000   2.06434
    R8        2.06059   0.00000   0.00000   0.00001   0.00001   2.06060
    R9        2.06421   0.00001   0.00000   0.00001   0.00001   2.06422
   R10        2.06691  -0.00001   0.00000  -0.00004  -0.00004   2.06687
   R11        2.06388   0.00000   0.00000  -0.00002  -0.00002   2.06386
   R12        2.88908   0.00000   0.00000   0.00000   0.00000   2.88908
   R13        2.06270   0.00000   0.00000  -0.00001  -0.00001   2.06269
   R14        2.06448   0.00000   0.00000   0.00000   0.00000   2.06447
   R15        2.06258   0.00000   0.00000   0.00000   0.00000   2.06258
   R16        2.08873   0.00000   0.00000   0.00001   0.00001   2.08874
   R17        2.30052   0.00000   0.00000  -0.00001  -0.00001   2.30051
    A1        2.08440   0.00002   0.00000   0.00006   0.00005   2.08446
    A2        2.08410   0.00000   0.00000   0.00005   0.00005   2.08416
    A3        2.11432  -0.00002   0.00000  -0.00012  -0.00012   2.11420
    A4        1.88747   0.00000   0.00000   0.00010   0.00010   1.88757
    A5        1.87200   0.00000   0.00000  -0.00018  -0.00018   1.87182
    A6        1.97222  -0.00001   0.00000   0.00000   0.00000   1.97222
    A7        1.88124   0.00000   0.00000   0.00008   0.00008   1.88133
    A8        1.92977   0.00000   0.00000   0.00000   0.00000   1.92977
    A9        1.91802   0.00000   0.00000   0.00001   0.00001   1.91803
   A10        1.92314   0.00000   0.00000  -0.00001  -0.00001   1.92313
   A11        1.92748   0.00000   0.00000   0.00001   0.00001   1.92748
   A12        1.94747   0.00000   0.00000   0.00008   0.00008   1.94755
   A13        1.88840   0.00000   0.00000   0.00000   0.00000   1.88840
   A14        1.88219   0.00000   0.00000  -0.00004  -0.00004   1.88215
   A15        1.89350   0.00000   0.00000  -0.00004  -0.00004   1.89346
   A16        1.89592  -0.00001   0.00000  -0.00007  -0.00008   1.89584
   A17        1.87947   0.00000   0.00000   0.00001   0.00001   1.87948
   A18        1.98797   0.00001   0.00000   0.00003   0.00003   1.98800
   A19        1.85775   0.00000   0.00000   0.00003   0.00003   1.85778
   A20        1.92315   0.00000   0.00000   0.00002   0.00002   1.92317
   A21        1.91460  -0.00001   0.00000  -0.00001  -0.00001   1.91460
   A22        1.94921   0.00000   0.00000  -0.00001  -0.00001   1.94920
   A23        1.92341   0.00000   0.00000  -0.00001  -0.00001   1.92340
   A24        1.93346   0.00000   0.00000  -0.00002  -0.00002   1.93344
   A25        1.87980   0.00000   0.00000   0.00000   0.00000   1.87981
   A26        1.88572   0.00000   0.00000   0.00003   0.00003   1.88575
   A27        1.89027   0.00000   0.00000   0.00000   0.00000   1.89027
   A28        1.96041   0.00000   0.00000  -0.00004  -0.00004   1.96036
   A29        2.19146   0.00000   0.00000   0.00007   0.00007   2.19153
   A30        2.13132   0.00000   0.00000  -0.00003  -0.00003   2.13129
    D1        0.61361   0.00000  -0.00001   0.00263   0.00262   0.61624
    D2        2.63826   0.00001  -0.00001   0.00268   0.00267   2.64093
    D3       -1.52848   0.00001  -0.00001   0.00257   0.00256  -1.52593
    D4       -2.55622   0.00000  -0.00002   0.00228   0.00226  -2.55396
    D5       -0.53158   0.00000  -0.00002   0.00233   0.00231  -0.52926
    D6        1.58486   0.00000  -0.00002   0.00222   0.00220   1.58706
    D7        0.78395   0.00000  -0.00009  -0.00019  -0.00028   0.78367
    D8        2.78927   0.00000  -0.00009  -0.00020  -0.00028   2.78899
    D9       -1.36651   0.00000  -0.00009  -0.00018  -0.00027  -1.36678
   D10       -2.32890   0.00000  -0.00008   0.00016   0.00008  -2.32882
   D11       -0.32357   0.00000  -0.00008   0.00016   0.00008  -0.32349
   D12        1.80383   0.00000  -0.00007   0.00017   0.00010   1.80393
   D13       -3.11925   0.00000   0.00001   0.00007   0.00008  -3.11917
   D14        0.02345   0.00000   0.00001   0.00007   0.00008   0.02353
   D15       -0.00640   0.00000   0.00000  -0.00028  -0.00028  -0.00668
   D16        3.13630   0.00000   0.00000  -0.00028  -0.00028   3.13602
   D17        3.11838   0.00000   0.00000  -0.00065  -0.00065   3.11773
   D18       -1.07952   0.00000   0.00000  -0.00066  -0.00066  -1.08018
   D19        1.02803   0.00000   0.00000  -0.00065  -0.00065   1.02738
   D20        1.00002   0.00000   0.00000  -0.00078  -0.00078   0.99924
   D21        3.08531   0.00000   0.00000  -0.00078  -0.00078   3.08453
   D22       -1.09033   0.00000   0.00000  -0.00077  -0.00077  -1.09111
   D23       -1.07461   0.00000   0.00000  -0.00088  -0.00088  -1.07549
   D24        1.01068   0.00000   0.00000  -0.00089  -0.00089   1.00979
   D25        3.11823   0.00000   0.00000  -0.00088  -0.00088   3.11735
   D26        1.03769   0.00000  -0.00002   0.00038   0.00037   1.03806
   D27        3.12635   0.00000  -0.00001   0.00038   0.00036   3.12671
   D28       -1.06525   0.00000  -0.00001   0.00036   0.00035  -1.06490
   D29       -1.09787   0.00000  -0.00001   0.00044   0.00043  -1.09744
   D30        0.99079   0.00000  -0.00001   0.00044   0.00043   0.99122
   D31        3.08238   0.00000  -0.00001   0.00042   0.00042   3.08280
   D32       -3.13762   0.00000  -0.00001   0.00041   0.00039  -3.13723
   D33       -1.04896   0.00000  -0.00001   0.00040   0.00039  -1.04858
   D34        1.04263   0.00000  -0.00001   0.00038   0.00038   1.04300
         Item               Value     Threshold  Converged?
 Maximum Force            0.000016     0.000015     NO 
 RMS     Force            0.000004     0.000010     YES
 Maximum Displacement     0.004794     0.000060     NO 
 RMS     Displacement     0.001473     0.000040     NO 
 Predicted change in Energy=-4.087284D-08
 GradGradGradGradGradGradGradGradGradGradGradGradGradGradGradGradGradGrad

                          Input orientation:                          
 ---------------------------------------------------------------------
 Center     Atomic      Atomic             Coordinates (Angstroms)
 Number     Number       Type             X           Y           Z
 ---------------------------------------------------------------------
      1          7           0        0.063818    0.181504   -0.068609
      2          6           0       -0.634798   -0.902108    0.625307
      3          1           0        0.108964   -1.504977    1.150365
      4          1           0       -1.280016   -0.443326    1.373739
      5          6           0       -1.466961   -1.774561   -0.314561
      6          1           0       -1.947355   -2.580156    0.245419
      7          1           0       -2.246221   -1.181601   -0.794329
      8          1           0       -0.849635   -2.229607   -1.092405
      9          6           0        1.384961   -0.065816   -0.638285
     10          1           0        1.363654   -1.022897   -1.167258
     11          1           0        1.569348    0.700955   -1.393833
     12          6           0        2.515089   -0.057047    0.391316
     13          1           0        2.365092   -0.816132    1.161199
     14          1           0        3.471035   -0.262447   -0.095997
     15          1           0        2.583018    0.914823    0.883421
     16          6           0       -0.543001    1.390036   -0.200274
     17          1           0        0.077628    2.112510   -0.761135
     18          8           0       -1.641417    1.682081    0.235843
 ---------------------------------------------------------------------
                    Distance matrix (angstroms):
                    1          2          3          4          5
     1  N    0.000000
     2  C    1.464172   0.000000
     3  H    2.081383   1.091934   0.000000
     4  H    2.068011   1.089466   1.762460   0.000000
     5  C    2.495990   1.528732   2.168461   2.158122   0.000000
     6  H    3.430772   2.164016   2.490660   2.506888   1.092401
     7  H    2.778669   2.165679   3.071368   2.485783   1.090424
     8  H    2.774168   2.181500   2.544409   3.075368   1.092336
     9  C    1.459835   2.524971   2.626523   3.360484   3.340369
    10  H    2.084990   2.687320   2.679183   3.712351   3.050323
    11  H    2.071876   3.391902   3.670396   4.133728   4.063518
    12  C    2.505428   3.269659   2.908968   3.939186   4.393728
    13  H    2.793487   3.048592   2.358970   3.670282   4.216763
    14  H    3.436128   4.217501   3.794841   4.976477   5.168952
    15  H    2.791145   3.704349   3.470970   4.124077   5.007023
    16  C    1.358718   2.438018   3.260427   2.526247   3.298702
    17  H    2.051480   3.393773   4.091581   3.596274   4.206484
    18  O    2.291778   2.800535   3.749336   2.437780   3.504533
                    6          7          8          9         10
     6  H    0.000000
     7  H    1.768149   0.000000
     8  H    1.765686   1.771332   0.000000
     9  C    4.266986   3.801948   3.143507   0.000000
    10  H    3.922179   3.632555   2.521983   1.093742   0.000000
    11  H    5.081342   4.296741   3.811893   1.092150   1.750804
    12  C    5.128428   5.033930   4.271161   1.528837   2.165138
    13  H    4.748435   5.022138   4.172663   2.182148   2.543097
    14  H    5.903159   5.832626   4.850849   2.164357   2.483332
    15  H    5.757274   5.525521   5.057117   2.170848   3.073580
    16  C    4.234769   3.141205   3.740552   2.455280   3.223761
    17  H    5.209109   4.031444   4.452363   2.543486   3.413148
    18  O    4.273213   3.102856   4.206240   3.602528   4.279725
                   11         12         13         14         15
    11  H    0.000000
    12  C    2.157719   0.000000
    13  H    3.076191   1.091526   0.000000
    14  H    2.495784   1.092473   1.763581   0.000000
    15  H    2.501830   1.091473   1.766595   1.770254   0.000000
    16  C    2.522189   3.434522   3.895869   4.342126   3.342487
    17  H    2.148958   3.460685   4.183874   4.195002   3.227382
    18  O    3.731952   4.508357   4.811389   5.479824   4.342107
                   16         17         18
    16  C    0.000000
    17  H    1.105312   0.000000
    18  O    1.217377   2.033311   0.000000
 Stoichiometry    C5H11NO
 Framework group  C1[X(C5H11NO)]
 Deg. of freedom    48
 Full point group                 C1      NOp   1
 Largest Abelian subgroup         C1      NOp   1
 Largest concise Abelian subgroup C1      NOp   1
                         Standard orientation:                         
 ---------------------------------------------------------------------
 Center     Atomic      Atomic             Coordinates (Angstroms)
 Number     Number       Type             X           Y           Z
 ---------------------------------------------------------------------
      1          7           0        0.064583   -0.181169    0.071454
      2          6           0       -0.645279    0.890857   -0.629012
      3          1           0        0.092135    1.498040   -1.158039
      4          1           0       -1.285920    0.420809   -1.374378
      5          6           0       -1.486145    1.760574    0.305632
      6          1           0       -1.974912    2.557681   -0.259228
      7          1           0       -2.259167    1.162653    0.789318
      8          1           0       -0.873349    2.226783    1.080440
      9          6           0        1.383246    0.083255    0.639192
     10          1           0        1.352231    1.043352    1.162185
     11          1           0        1.575667   -0.676848    1.399460
     12          6           0        2.513172    0.079658   -0.390661
     13          1           0        2.355215    0.832340   -1.165225
     14          1           0        3.467068    0.297902    0.095084
     15          1           0        2.590966   -0.894518   -0.876708
     16          6           0       -0.529764   -1.395022    0.210838
     17          1           0        0.098378   -2.107569    0.776019
     18          8           0       -1.625221   -1.701047   -0.223130
 ---------------------------------------------------------------------
 Rotational constants (GHZ):      3.0851113      2.0863388      1.4210526
 Standard basis: TZVP (5D, 7F)
 There are   206 symmetry adapted cartesian basis functions of A   symmetry.
 There are   199 symmetry adapted basis functions of A   symmetry.
   199 basis functions,   333 primitive gaussians,   206 cartesian basis functions
    28 alpha electrons       28 beta electrons
       nuclear repulsion energy       318.8172751437 Hartrees.
 NAtoms=   18 NActive=   18 NUniq=   18 SFac= 1.00D+00 NAtFMM=   60 NAOKFM=F Big=F
 Integral buffers will be    131072 words long.
 Raffenetti 2 integral format.
 Two-electron integral symmetry is turned on.
 One-electron integrals computed using PRISM.
 NBasis=   199 RedAO= T EigKep=  2.86D-04  NBF=   199
 NBsUse=   199 1.00D-06 EigRej= -1.00D+00 NBFU=   199
 Initial guess from the checkpoint file:  "DEF_opt_startvalue_M2.chk"
 B after Tr=     0.000000    0.000000    0.000000
         Rot=    1.000000    0.000136   -0.000089    0.000323 Ang=   0.04 deg.
 Keep R1 ints in memory in canonical form, NReq=202598390.
 Requested convergence on RMS density matrix=1.00D-08 within 128 cycles.
 Requested convergence on MAX density matrix=1.00D-06.
 Requested convergence on             energy=1.00D-06.
 No special actions if energy rises.
 SCF Done:  E(RB3LYP) =  -327.262589433     A.U. after    7 cycles
            NFock=  7  Conv=0.39D-08     -V/T= 2.0051
 DoSCS=F DFT=T ScalE2(SS,OS)=  1.000000  1.000000
 Range of M.O.s used for correlation:     1   199
 NBasis=   199 NAE=    28 NBE=    28 NFC=     0 NFV=     0
 NROrb=    199 NOA=    28 NOB=    28 NVA=   171 NVB=   171

 **** Warning!!: The largest alpha MO coefficient is  0.17159253D+02

 Symmetrizing basis deriv contribution to polar:
 IMax=3 JMax=2 DiffMx= 0.00D+00
 G2DrvN: will do    19 centers at a time, making    1 passes.
 Calling FoFCou, ICntrl=  3107 FMM=F I1Cent=   0 AccDes= 0.00D+00.
 End of G2Drv F.D. properties file   721 does not exist.
 End of G2Drv F.D. properties file   722 does not exist.
 End of G2Drv F.D. properties file   788 does not exist.
          IDoAtm=111111111111111111
          Differentiating once with respect to electric field.
                with respect to dipole field.
          Differentiating once with respect to nuclear coordinates.
 Keep R1 ints in memory in canonical form, NReq=202455622.
          There are    57 degrees of freedom in the 1st order CPHF.  IDoFFX=6 NUNeed=     3.
     54 vectors produced by pass  0 Test12= 8.40D-15 1.75D-09 XBig12= 5.62D+01 3.21D+00.
 AX will form    54 AO Fock derivatives at one time.
     54 vectors produced by pass  1 Test12= 8.40D-15 1.75D-09 XBig12= 1.35D+01 8.97D-01.
     54 vectors produced by pass  2 Test12= 8.40D-15 1.75D-09 XBig12= 7.94D-02 3.87D-02.
     54 vectors produced by pass  3 Test12= 8.40D-15 1.75D-09 XBig12= 3.14D-04 2.35D-03.
     54 vectors produced by pass  4 Test12= 8.40D-15 1.75D-09 XBig12= 6.18D-07 1.22D-04.
     31 vectors produced by pass  5 Test12= 8.40D-15 1.75D-09 XBig12= 6.13D-10 2.19D-06.
      4 vectors produced by pass  6 Test12= 8.40D-15 1.75D-09 XBig12= 5.84D-13 1.06D-07.
      2 vectors produced by pass  7 Test12= 8.40D-15 1.75D-09 XBig12= 1.39D-15 5.58D-09.
 InvSVY:  IOpt=1 It=  1 EMax= 3.55D-15
 Solved reduced A of dimension   307 with    57 vectors.
 Isotropic polarizability for W=    0.000000       71.60 Bohr**3.
 End of Minotr F.D. properties file   721 does not exist.
 End of Minotr F.D. properties file   722 does not exist.
 End of Minotr F.D. properties file   788 does not exist.
 Calling FoFJK, ICntrl=    100127 FMM=F ISym2X=0 I1Cent= 0 IOpClX= 0 NMat=1 NMatS=1 NMatT=0.
 ***** Axes restored to original set *****
 -------------------------------------------------------------------
 Center     Atomic                   Forces (Hartrees/Bohr)
 Number     Number              X              Y              Z
 -------------------------------------------------------------------
      1        7          -0.000001069   -0.000000038   -0.000002443
      2        6          -0.000000092    0.000001047    0.000000639
      3        1           0.000001195    0.000004546    0.000005021
      4        1          -0.000000639    0.000003579   -0.000000579
      5        6           0.000002345   -0.000003451    0.000005186
      6        1           0.000002900   -0.000001667    0.000007377
      7        1           0.000001313   -0.000006692    0.000001426
      8        1           0.000003032   -0.000005307    0.000007245
      9        6           0.000000033   -0.000000745   -0.000000197
     10        1           0.000002252   -0.000003378    0.000003115
     11        1          -0.000000294   -0.000003657   -0.000003143
     12        6          -0.000000791    0.000004408    0.000000745
     13        1          -0.000000282    0.000007300    0.000002905
     14        1          -0.000000106    0.000003803    0.000001711
     15        1          -0.000002047    0.000006517   -0.000003333
     16        6          -0.000002101   -0.000001756   -0.000006972
     17        1          -0.000003013   -0.000003013   -0.000009675
     18        8          -0.000002635   -0.000001494   -0.000009029
 -------------------------------------------------------------------
 Cartesian Forces:  Max     0.000009675 RMS     0.000003810
 FormGI is forming the generalized inverse of G from B-inverse, IUseBI=4.

 GradGradGradGradGradGradGradGradGradGradGradGradGradGradGradGradGradGrad
 Berny optimization.
 Using GEDIIS/GDIIS optimizer.
 Internal  Forces:  Max     0.000001474 RMS     0.000000382
 Search for a local minimum.
 Step number   3 out of a maximum of   91
 All quantities printed in internal units (Hartrees-Bohrs-Radians)
 Mixed Optimization -- En-DIIS/RFO-DIIS
 Swapping is turned off.
 Second derivative matrix not updated -- analytic derivatives used.
 DE= -3.22D-07 DEPred=-4.09D-08 R= 7.88D+00
 Trust test= 7.88D+00 RLast= 6.57D-03 DXMaxT set to 3.00D-01
 ITU=  0  1  0
     Eigenvalues ---    0.00138   0.00213   0.00253   0.00268   0.00568
     Eigenvalues ---    0.01814   0.04272   0.04323   0.04383   0.04423
     Eigenvalues ---    0.04471   0.04499   0.04803   0.04970   0.08201
     Eigenvalues ---    0.08426   0.08531   0.11848   0.11961   0.12273
     Eigenvalues ---    0.12318   0.13273   0.13528   0.14762   0.16046
     Eigenvalues ---    0.16271   0.20215   0.20773   0.23184   0.23404
     Eigenvalues ---    0.25656   0.27950   0.28306   0.31380   0.32422
     Eigenvalues ---    0.32830   0.33185   0.33378   0.33475   0.33519
     Eigenvalues ---    0.33610   0.33891   0.34372   0.34456   0.35431
     Eigenvalues ---    0.36214   0.44641   0.81582
 En-DIIS/RFO-DIIS IScMMF=        0 using points:     3    2    1
 RFO step:  Lambda=-4.85233322D-11.
 DidBck=F Rises=F RFO-DIIS coefs:    1.03501   -0.04196    0.00695
 Iteration  1 RMS(Cart)=  0.00016940 RMS(Int)=  0.00000001
 Iteration  2 RMS(Cart)=  0.00000001 RMS(Int)=  0.00000000
 Variable       Old X    -DE/DX   Delta X   Delta X   Delta X     New X
                                 (Linear)    (Quad)   (Total)
    R1        2.76688   0.00000   0.00000   0.00000   0.00000   2.76688
    R2        2.75869   0.00000   0.00000   0.00000   0.00000   2.75869
    R3        2.56760   0.00000   0.00000   0.00000   0.00000   2.56761
    R4        2.06346   0.00000   0.00000   0.00000   0.00000   2.06346
    R5        2.05879   0.00000   0.00000   0.00000   0.00000   2.05879
    R6        2.88889   0.00000   0.00000   0.00000   0.00000   2.88888
    R7        2.06434   0.00000   0.00000   0.00000   0.00000   2.06434
    R8        2.06060   0.00000   0.00000   0.00000   0.00000   2.06060
    R9        2.06422   0.00000   0.00000   0.00000   0.00000   2.06421
   R10        2.06687   0.00000   0.00000   0.00000   0.00000   2.06687
   R11        2.06386   0.00000   0.00000   0.00000   0.00000   2.06386
   R12        2.88908   0.00000   0.00000   0.00000   0.00000   2.88908
   R13        2.06269   0.00000   0.00000   0.00000   0.00000   2.06268
   R14        2.06447   0.00000   0.00000   0.00000   0.00000   2.06447
   R15        2.06258   0.00000   0.00000   0.00000   0.00000   2.06258
   R16        2.08874   0.00000   0.00000   0.00000   0.00000   2.08874
   R17        2.30051   0.00000   0.00000   0.00000   0.00000   2.30051
    A1        2.08446   0.00000   0.00001  -0.00001   0.00000   2.08446
    A2        2.08416   0.00000   0.00000   0.00000   0.00000   2.08416
    A3        2.11420   0.00000   0.00000   0.00000   0.00000   2.11420
    A4        1.88757   0.00000   0.00001   0.00000   0.00001   1.88757
    A5        1.87182   0.00000  -0.00001  -0.00001  -0.00002   1.87181
    A6        1.97222   0.00000   0.00000   0.00001   0.00001   1.97223
    A7        1.88133   0.00000   0.00000  -0.00001   0.00000   1.88132
    A8        1.92977   0.00000   0.00000   0.00000   0.00000   1.92977
    A9        1.91803   0.00000   0.00000   0.00000   0.00000   1.91803
   A10        1.92313   0.00000   0.00000   0.00000  -0.00001   1.92313
   A11        1.92748   0.00000   0.00000   0.00001   0.00001   1.92750
   A12        1.94755   0.00000   0.00000   0.00000   0.00000   1.94755
   A13        1.88840   0.00000   0.00000   0.00000   0.00000   1.88840
   A14        1.88215   0.00000   0.00000   0.00000   0.00000   1.88215
   A15        1.89346   0.00000   0.00000   0.00000   0.00000   1.89346
   A16        1.89584   0.00000   0.00000   0.00001   0.00001   1.89585
   A17        1.87948   0.00000  -0.00001   0.00000  -0.00001   1.87948
   A18        1.98800   0.00000   0.00001   0.00000   0.00001   1.98800
   A19        1.85778   0.00000   0.00000   0.00000   0.00000   1.85778
   A20        1.92317   0.00000  -0.00001   0.00000  -0.00001   1.92316
   A21        1.91460   0.00000   0.00000   0.00000   0.00000   1.91459
   A22        1.94920   0.00000   0.00001   0.00000   0.00000   1.94920
   A23        1.92340   0.00000  -0.00001   0.00000  -0.00001   1.92340
   A24        1.93344   0.00000   0.00000   0.00001   0.00001   1.93345
   A25        1.87981   0.00000   0.00000   0.00000  -0.00001   1.87980
   A26        1.88575   0.00000   0.00000   0.00000   0.00000   1.88576
   A27        1.89027   0.00000   0.00000   0.00000   0.00000   1.89027
   A28        1.96036   0.00000   0.00000   0.00000   0.00000   1.96036
   A29        2.19153   0.00000   0.00000   0.00000   0.00000   2.19154
   A30        2.13129   0.00000   0.00000   0.00000   0.00000   2.13129
    D1        0.61624   0.00000   0.00011   0.00008   0.00018   0.61642
    D2        2.64093   0.00000   0.00011   0.00007   0.00018   2.64111
    D3       -1.52593   0.00000   0.00010   0.00007   0.00017  -1.52575
    D4       -2.55396   0.00000   0.00011   0.00011   0.00022  -2.55374
    D5       -0.52926   0.00000   0.00012   0.00010   0.00021  -0.52905
    D6        1.58706   0.00000   0.00011   0.00010   0.00021   1.58728
    D7        0.78367   0.00000   0.00015   0.00000   0.00015   0.78382
    D8        2.78899   0.00000   0.00015   0.00000   0.00015   2.78914
    D9       -1.36678   0.00000   0.00015   0.00000   0.00015  -1.36663
   D10       -2.32882   0.00000   0.00014  -0.00003   0.00011  -2.32871
   D11       -0.32349   0.00000   0.00014  -0.00003   0.00011  -0.32338
   D12        1.80393   0.00000   0.00014  -0.00003   0.00011   1.80403
   D13       -3.11917   0.00000  -0.00002  -0.00001  -0.00002  -3.11919
   D14        0.02353   0.00000  -0.00002  -0.00001  -0.00002   0.02351
   D15       -0.00668   0.00000  -0.00001   0.00003   0.00002  -0.00666
   D16        3.13602   0.00000  -0.00001   0.00003   0.00002   3.13604
   D17        3.11773   0.00000  -0.00002   0.00003   0.00001   3.11773
   D18       -1.08018   0.00000  -0.00002   0.00003   0.00001  -1.08017
   D19        1.02738   0.00000  -0.00002   0.00003   0.00001   1.02739
   D20        0.99924   0.00000  -0.00003   0.00002  -0.00001   0.99923
   D21        3.08453   0.00000  -0.00003   0.00002  -0.00001   3.08452
   D22       -1.09111   0.00000  -0.00003   0.00002   0.00000  -1.09111
   D23       -1.07549   0.00000  -0.00003   0.00003  -0.00001  -1.07550
   D24        1.00979   0.00000  -0.00003   0.00003  -0.00001   1.00979
   D25        3.11735   0.00000  -0.00003   0.00003   0.00000   3.11735
   D26        1.03806   0.00000   0.00004   0.00000   0.00004   1.03810
   D27        3.12671   0.00000   0.00004  -0.00001   0.00003   3.12674
   D28       -1.06490   0.00000   0.00003   0.00000   0.00003  -1.06487
   D29       -1.09744   0.00000   0.00004  -0.00001   0.00002  -1.09741
   D30        0.99122   0.00000   0.00003  -0.00002   0.00001   0.99123
   D31        3.08280   0.00000   0.00003  -0.00001   0.00001   3.08281
   D32       -3.13723   0.00000   0.00004  -0.00001   0.00003  -3.13720
   D33       -1.04858   0.00000   0.00003  -0.00001   0.00002  -1.04855
   D34        1.04300   0.00000   0.00003  -0.00001   0.00002   1.04303
         Item               Value     Threshold  Converged?
 Maximum Force            0.000001     0.000015     YES
 RMS     Force            0.000000     0.000010     YES
 Maximum Displacement     0.000463     0.000060     NO 
 RMS     Displacement     0.000169     0.000040     NO 
 Predicted change in Energy=-3.416521D-10
 GradGradGradGradGradGradGradGradGradGradGradGradGradGradGradGradGradGrad

                          Input orientation:                          
 ---------------------------------------------------------------------
 Center     Atomic      Atomic             Coordinates (Angstroms)
 Number     Number       Type             X           Y           Z
 ---------------------------------------------------------------------
      1          7           0        0.063777    0.181580   -0.068623
      2          6           0       -0.634831   -0.902015    0.625327
      3          1           0        0.108914   -1.504773    1.150538
      4          1           0       -1.280160   -0.443190    1.373634
      5          6           0       -1.466829   -1.774637   -0.314529
      6          1           0       -1.947219   -2.580201    0.245497
      7          1           0       -2.246087   -1.181800   -0.794454
      8          1           0       -0.849390   -2.229731   -1.092252
      9          6           0        1.384908   -0.065758   -0.638320
     10          1           0        1.363557   -1.022775   -1.167410
     11          1           0        1.569341    0.701095   -1.393775
     12          6           0        2.515038   -0.057178    0.391281
     13          1           0        2.365018   -0.816367    1.161055
     14          1           0        3.470971   -0.262554   -0.096070
     15          1           0        2.583015    0.914619    0.883521
     16          6           0       -0.543019    1.390128   -0.200258
     17          1           0        0.077611    2.112593   -0.761130
     18          8           0       -1.641415    1.682198    0.235891
 ---------------------------------------------------------------------
                    Distance matrix (angstroms):
                    1          2          3          4          5
     1  N    0.000000
     2  C    1.464171   0.000000
     3  H    2.081388   1.091935   0.000000
     4  H    2.067997   1.089465   1.762458   0.000000
     5  C    2.495998   1.528731   2.168459   2.158121   0.000000
     6  H    3.430774   2.164010   2.490648   2.506886   1.092400
     7  H    2.778688   2.165687   3.071374   2.485792   1.090425
     8  H    2.774186   2.181500   2.544410   3.075368   1.092335
     9  C    1.459835   2.524971   2.626584   3.360507   3.340287
    10  H    2.085001   2.687386   2.679428   3.712420   3.050211
    11  H    2.071871   3.391918   3.670454   4.133715   4.063539
    12  C    2.505433   3.269588   2.908855   3.939233   4.393529
    13  H    2.793513   3.048514   2.358817   3.670392   4.216477
    14  H    3.436128   4.217455   3.794808   4.976536   5.168751
    15  H    2.791143   3.704235   3.470725   4.124073   5.006861
    16  C    1.358720   2.438020   3.260387   2.526178   3.298821
    17  H    2.051480   3.393774   4.091552   3.596219   4.206579
    18  O    2.291782   2.800541   3.749269   2.437671   3.504732
                    6          7          8          9         10
     6  H    0.000000
     7  H    1.768148   0.000000
     8  H    1.765682   1.771329   0.000000
     9  C    4.266923   3.801849   3.143394   0.000000
    10  H    3.922132   3.632343   2.521810   1.093743   0.000000
    11  H    5.081369   4.296739   3.811944   1.092149   1.750804
    12  C    5.128220   5.033791   4.270859   1.528838   2.165134
    13  H    4.748131   5.021936   4.172219   2.182151   2.543085
    14  H    5.902960   5.832452   4.850534   2.164352   2.483324
    15  H    5.757070   5.525468   5.056879   2.170852   3.073580
    16  C    4.234855   3.141388   3.740708   2.455281   3.223742
    17  H    5.209180   4.031589   4.452500   2.543486   3.413100
    18  O    4.273366   3.103179   4.206478   3.602531   4.279718
                   11         12         13         14         15
    11  H    0.000000
    12  C    2.157717   0.000000
    13  H    3.076191   1.091525   0.000000
    14  H    2.495766   1.092472   1.763577   0.000000
    15  H    2.501840   1.091472   1.766596   1.770254   0.000000
    16  C    2.522165   3.434578   3.895957   4.342157   3.342570
    17  H    2.148913   3.460782   4.183998   4.195059   3.227548
    18  O    3.731934   4.508401   4.811472   5.479849   4.342166
                   16         17         18
    16  C    0.000000
    17  H    1.105312   0.000000
    18  O    1.217376   2.033308   0.000000
 Stoichiometry    C5H11NO
 Framework group  C1[X(C5H11NO)]
 Deg. of freedom    48
 Full point group                 C1      NOp   1
 Largest Abelian subgroup         C1      NOp   1
 Largest concise Abelian subgroup C1      NOp   1
                         Standard orientation:                         
 ---------------------------------------------------------------------
 Center     Atomic      Atomic             Coordinates (Angstroms)
 Number     Number       Type             X           Y           Z
 ---------------------------------------------------------------------
      1          7           0        0.064530   -0.181227    0.071471
      2          6           0       -0.645215    0.890867   -0.629010
      3          1           0        0.092242    1.497848   -1.158210
      4          1           0       -1.286044    0.420852   -1.374234
      5          6           0       -1.485789    1.760855    0.305641
      6          1           0       -1.974471    2.557990   -0.259252
      7          1           0       -2.258869    1.163151    0.789505
      8          1           0       -0.872804    2.227041    1.080313
      9          6           0        1.383226    0.083057    0.639195
     10          1           0        1.352297    1.043095    1.162306
     11          1           0        1.575623   -0.677151    1.399365
     12          6           0        2.513125    0.079514   -0.390689
     13          1           0        2.355213    0.832319   -1.165142
     14          1           0        3.467047    0.297619    0.095068
     15          1           0        2.590836   -0.894599   -0.876874
     16          6           0       -0.529937   -1.395025    0.210841
     17          1           0        0.098135   -2.107638    0.776017
     18          8           0       -1.625422   -1.700944   -0.223129
 ---------------------------------------------------------------------
 Rotational constants (GHZ):      3.0849258      2.0864115      1.4210513
 Standard basis: TZVP (5D, 7F)
 There are   206 symmetry adapted cartesian basis functions of A   symmetry.
 There are   199 symmetry adapted basis functions of A   symmetry.
   199 basis functions,   333 primitive gaussians,   206 cartesian basis functions
    28 alpha electrons       28 beta electrons
       nuclear repulsion energy       318.8169382238 Hartrees.
 NAtoms=   18 NActive=   18 NUniq=   18 SFac= 1.00D+00 NAtFMM=   60 NAOKFM=F Big=F
 Integral buffers will be    131072 words long.
 Raffenetti 2 integral format.
 Two-electron integral symmetry is turned on.
 One-electron integrals computed using PRISM.
 NBasis=   199 RedAO= T EigKep=  2.86D-04  NBF=   199
 NBsUse=   199 1.00D-06 EigRej= -1.00D+00 NBFU=   199
 Initial guess from the checkpoint file:  "DEF_opt_startvalue_M2.chk"
 B after Tr=     0.000000    0.000000    0.000000
         Rot=    1.000000   -0.000001   -0.000009    0.000057 Ang=  -0.01 deg.
 Keep R1 ints in memory in canonical form, NReq=202598390.
 Requested convergence on RMS density matrix=1.00D-08 within 128 cycles.
 Requested convergence on MAX density matrix=1.00D-06.
 Requested convergence on             energy=1.00D-06.
 No special actions if energy rises.
 SCF Done:  E(RB3LYP) =  -327.262589459     A.U. after    5 cycles
            NFock=  5  Conv=0.46D-08     -V/T= 2.0051
 DoSCS=F DFT=T ScalE2(SS,OS)=  1.000000  1.000000
 Range of M.O.s used for correlation:     1   199
 NBasis=   199 NAE=    28 NBE=    28 NFC=     0 NFV=     0
 NROrb=    199 NOA=    28 NOB=    28 NVA=   171 NVB=   171

 **** Warning!!: The largest alpha MO coefficient is  0.17163637D+02

 Symmetrizing basis deriv contribution to polar:
 IMax=3 JMax=2 DiffMx= 0.00D+00
 G2DrvN: will do    19 centers at a time, making    1 passes.
 Calling FoFCou, ICntrl=  3107 FMM=F I1Cent=   0 AccDes= 0.00D+00.
 End of G2Drv F.D. properties file   721 does not exist.
 End of G2Drv F.D. properties file   722 does not exist.
 End of G2Drv F.D. properties file   788 does not exist.
          IDoAtm=111111111111111111
          Differentiating once with respect to electric field.
                with respect to dipole field.
          Differentiating once with respect to nuclear coordinates.
 Keep R1 ints in memory in canonical form, NReq=202455622.
          There are    57 degrees of freedom in the 1st order CPHF.  IDoFFX=6 NUNeed=     3.
     54 vectors produced by pass  0 Test12= 8.40D-15 1.75D-09 XBig12= 5.62D+01 3.21D+00.
 AX will form    54 AO Fock derivatives at one time.
     54 vectors produced by pass  1 Test12= 8.40D-15 1.75D-09 XBig12= 1.35D+01 8.97D-01.
     54 vectors produced by pass  2 Test12= 8.40D-15 1.75D-09 XBig12= 7.95D-02 3.87D-02.
     54 vectors produced by pass  3 Test12= 8.40D-15 1.75D-09 XBig12= 3.14D-04 2.35D-03.
     54 vectors produced by pass  4 Test12= 8.40D-15 1.75D-09 XBig12= 6.19D-07 1.22D-04.
     31 vectors produced by pass  5 Test12= 8.40D-15 1.75D-09 XBig12= 6.13D-10 2.18D-06.
      4 vectors produced by pass  6 Test12= 8.40D-15 1.75D-09 XBig12= 5.84D-13 1.06D-07.
      2 vectors produced by pass  7 Test12= 8.40D-15 1.75D-09 XBig12= 1.41D-15 5.61D-09.
 InvSVY:  IOpt=1 It=  1 EMax= 6.22D-15
 Solved reduced A of dimension   307 with    57 vectors.
 Isotropic polarizability for W=    0.000000       71.60 Bohr**3.
 End of Minotr F.D. properties file   721 does not exist.
 End of Minotr F.D. properties file   722 does not exist.
 End of Minotr F.D. properties file   788 does not exist.
 Calling FoFJK, ICntrl=    100127 FMM=F ISym2X=0 I1Cent= 0 IOpClX= 0 NMat=1 NMatS=1 NMatT=0.
 ***** Axes restored to original set *****
 -------------------------------------------------------------------
 Center     Atomic                   Forces (Hartrees/Bohr)
 Number     Number              X              Y              Z
 -------------------------------------------------------------------
      1        7          -0.000000595   -0.000000362   -0.000002258
      2        6           0.000000355    0.000001385    0.000001709
      3        1           0.000000833    0.000004416    0.000004569
      4        1          -0.000000724    0.000003477   -0.000000551
      5        6           0.000002064   -0.000003447    0.000004615
      6        1           0.000002809   -0.000001836    0.000007460
      7        1           0.000001605   -0.000006368    0.000001766
      8        1           0.000003194   -0.000005657    0.000006797
      9        6           0.000000001   -0.000000981   -0.000000235
     10        1           0.000001647   -0.000003086    0.000003448
     11        1          -0.000000494   -0.000003677   -0.000003225
     12        6          -0.000000640    0.000004615    0.000000374
     13        1          -0.000000133    0.000007424    0.000003279
     14        1          -0.000000023    0.000003917    0.000001788
     15        1          -0.000002205    0.000006612   -0.000003426
     16        6          -0.000002133   -0.000001822   -0.000007246
     17        1          -0.000002742   -0.000003133   -0.000009740
     18        8          -0.000002819   -0.000001475   -0.000009122
 -------------------------------------------------------------------
 Cartesian Forces:  Max     0.000009740 RMS     0.000003814
 FormGI is forming the generalized inverse of G from B-inverse, IUseBI=4.

 GradGradGradGradGradGradGradGradGradGradGradGradGradGradGradGradGradGrad
 Berny optimization.
 Using GEDIIS/GDIIS optimizer.
 Internal  Forces:  Max     0.000000145 RMS     0.000000029
 Search for a local minimum.
 Step number   4 out of a maximum of   91
 All quantities printed in internal units (Hartrees-Bohrs-Radians)
 Mixed Optimization -- En-DIIS/RFO-DIIS
 Swapping is turned off.
 Second derivative matrix not updated -- analytic derivatives used.
 DE= -2.59D-08 DEPred=-3.42D-10 R= 7.59D+01
 Trust test= 7.59D+01 RLast= 5.90D-04 DXMaxT set to 3.00D-01
 ITU=  0  0  1  0
     Eigenvalues ---    0.00138   0.00213   0.00253   0.00268   0.00569
     Eigenvalues ---    0.01814   0.04272   0.04323   0.04383   0.04423
     Eigenvalues ---    0.04471   0.04499   0.04803   0.04970   0.08201
     Eigenvalues ---    0.08426   0.08531   0.11848   0.11961   0.12273
     Eigenvalues ---    0.12318   0.13273   0.13528   0.14762   0.16046
     Eigenvalues ---    0.16271   0.20215   0.20774   0.23184   0.23405
     Eigenvalues ---    0.25657   0.27950   0.28306   0.31380   0.32422
     Eigenvalues ---    0.32830   0.33184   0.33379   0.33475   0.33519
     Eigenvalues ---    0.33610   0.33891   0.34372   0.34456   0.35431
     Eigenvalues ---    0.36214   0.44641   0.81582
 En-DIIS/RFO-DIIS IScMMF=        0 using points:     4    3    2    1
 RFO step:  Lambda=-1.71863101D-13.
 DidBck=F Rises=F RFO-DIIS coefs:    1.03753   -0.03728   -0.00009   -0.00016
 Iteration  1 RMS(Cart)=  0.00000518 RMS(Int)=  0.00000000
 Iteration  2 RMS(Cart)=  0.00000000 RMS(Int)=  0.00000000
 Variable       Old X    -DE/DX   Delta X   Delta X   Delta X     New X
                                 (Linear)    (Quad)   (Total)
    R1        2.76688   0.00000   0.00000   0.00000   0.00000   2.76688
    R2        2.75869   0.00000   0.00000   0.00000   0.00000   2.75869
    R3        2.56761   0.00000   0.00000   0.00000   0.00000   2.56761
    R4        2.06346   0.00000   0.00000   0.00000   0.00000   2.06346
    R5        2.05879   0.00000   0.00000   0.00000   0.00000   2.05879
    R6        2.88888   0.00000   0.00000   0.00000   0.00000   2.88888
    R7        2.06434   0.00000   0.00000   0.00000   0.00000   2.06434
    R8        2.06060   0.00000   0.00000   0.00000   0.00000   2.06060
    R9        2.06421   0.00000   0.00000   0.00000   0.00000   2.06421
   R10        2.06687   0.00000   0.00000   0.00000   0.00000   2.06687
   R11        2.06386   0.00000   0.00000   0.00000   0.00000   2.06386
   R12        2.88908   0.00000   0.00000   0.00000   0.00000   2.88908
   R13        2.06268   0.00000   0.00000   0.00000   0.00000   2.06268
   R14        2.06447   0.00000   0.00000   0.00000   0.00000   2.06447
   R15        2.06258   0.00000   0.00000   0.00000   0.00000   2.06258
   R16        2.08874   0.00000   0.00000   0.00000   0.00000   2.08874
   R17        2.30051   0.00000   0.00000   0.00000   0.00000   2.30051
    A1        2.08446   0.00000   0.00000   0.00000   0.00000   2.08446
    A2        2.08416   0.00000   0.00000   0.00000   0.00000   2.08416
    A3        2.11420   0.00000   0.00000   0.00000   0.00000   2.11420
    A4        1.88757   0.00000   0.00000   0.00000   0.00000   1.88757
    A5        1.87181   0.00000   0.00000   0.00000   0.00000   1.87180
    A6        1.97223   0.00000   0.00000   0.00000   0.00000   1.97223
    A7        1.88132   0.00000   0.00000   0.00000   0.00000   1.88132
    A8        1.92977   0.00000   0.00000   0.00000   0.00000   1.92977
    A9        1.91803   0.00000   0.00000   0.00000   0.00000   1.91803
   A10        1.92313   0.00000   0.00000   0.00000   0.00000   1.92313
   A11        1.92750   0.00000   0.00000   0.00000   0.00000   1.92750
   A12        1.94755   0.00000   0.00000   0.00000   0.00000   1.94755
   A13        1.88840   0.00000   0.00000   0.00000   0.00000   1.88840
   A14        1.88215   0.00000   0.00000   0.00000   0.00000   1.88215
   A15        1.89346   0.00000   0.00000   0.00000   0.00000   1.89346
   A16        1.89585   0.00000   0.00000   0.00000   0.00000   1.89585
   A17        1.87948   0.00000   0.00000   0.00000   0.00000   1.87948
   A18        1.98800   0.00000   0.00000   0.00000   0.00000   1.98800
   A19        1.85778   0.00000   0.00000   0.00000   0.00000   1.85778
   A20        1.92316   0.00000   0.00000   0.00000   0.00000   1.92316
   A21        1.91459   0.00000   0.00000   0.00000   0.00000   1.91459
   A22        1.94920   0.00000   0.00000   0.00000   0.00000   1.94920
   A23        1.92340   0.00000   0.00000   0.00000   0.00000   1.92340
   A24        1.93345   0.00000   0.00000   0.00000   0.00000   1.93345
   A25        1.87980   0.00000   0.00000   0.00000   0.00000   1.87980
   A26        1.88576   0.00000   0.00000   0.00000   0.00000   1.88576
   A27        1.89027   0.00000   0.00000   0.00000   0.00000   1.89027
   A28        1.96036   0.00000   0.00000   0.00000   0.00000   1.96036
   A29        2.19154   0.00000   0.00000   0.00000   0.00000   2.19154
   A30        2.13129   0.00000   0.00000   0.00000   0.00000   2.13129
    D1        0.61642   0.00000   0.00001   0.00000   0.00001   0.61643
    D2        2.64111   0.00000   0.00001   0.00000   0.00001   2.64111
    D3       -1.52575   0.00000   0.00001   0.00000   0.00001  -1.52575
    D4       -2.55374   0.00000   0.00001   0.00000   0.00001  -2.55373
    D5       -0.52905   0.00000   0.00001   0.00000   0.00001  -0.52904
    D6        1.58728   0.00000   0.00001   0.00000   0.00001   1.58729
    D7        0.78382   0.00000   0.00000   0.00000   0.00000   0.78382
    D8        2.78914   0.00000   0.00000   0.00000   0.00000   2.78915
    D9       -1.36663   0.00000   0.00000   0.00000   0.00000  -1.36663
   D10       -2.32871   0.00000   0.00000   0.00000   0.00000  -2.32871
   D11       -0.32338   0.00000   0.00000   0.00000   0.00000  -0.32338
   D12        1.80403   0.00000   0.00000   0.00000   0.00000   1.80403
   D13       -3.11919   0.00000   0.00000   0.00000   0.00000  -3.11919
   D14        0.02351   0.00000   0.00000   0.00000   0.00000   0.02351
   D15       -0.00666   0.00000   0.00000   0.00000   0.00000  -0.00666
   D16        3.13604   0.00000   0.00000   0.00000   0.00000   3.13604
   D17        3.11773   0.00000   0.00000   0.00000   0.00000   3.11773
   D18       -1.08017   0.00000   0.00000   0.00000   0.00000  -1.08017
   D19        1.02739   0.00000   0.00000   0.00000   0.00000   1.02739
   D20        0.99923   0.00000   0.00000   0.00000   0.00000   0.99923
   D21        3.08452   0.00000   0.00000   0.00000   0.00000   3.08451
   D22       -1.09111   0.00000   0.00000   0.00000   0.00000  -1.09111
   D23       -1.07550   0.00000   0.00000   0.00000   0.00000  -1.07550
   D24        1.00979   0.00000   0.00000   0.00000   0.00000   1.00979
   D25        3.11735   0.00000   0.00000   0.00000   0.00000   3.11734
   D26        1.03810   0.00000   0.00000   0.00000   0.00000   1.03809
   D27        3.12674   0.00000   0.00000   0.00000   0.00000   3.12674
   D28       -1.06487   0.00000   0.00000   0.00000   0.00000  -1.06487
   D29       -1.09741   0.00000   0.00000   0.00000   0.00000  -1.09742
   D30        0.99123   0.00000   0.00000   0.00000   0.00000   0.99123
   D31        3.08281   0.00000   0.00000   0.00000   0.00000   3.08281
   D32       -3.13720   0.00000   0.00000   0.00000   0.00000  -3.13720
   D33       -1.04855   0.00000   0.00000   0.00000   0.00000  -1.04856
   D34        1.04303   0.00000   0.00000   0.00000   0.00000   1.04302
         Item               Value     Threshold  Converged?
 Maximum Force            0.000000     0.000015     YES
 RMS     Force            0.000000     0.000010     YES
 Maximum Displacement     0.000015     0.000060     YES
 RMS     Displacement     0.000005     0.000040     YES
 Predicted change in Energy=-6.460047D-13
 Optimization completed.
    -- Stationary point found.
                           ----------------------------
                           !   Optimized Parameters   !
                           ! (Angstroms and Degrees)  !
 --------------------------                            --------------------------
 ! Name  Definition              Value          Derivative Info.                !
 --------------------------------------------------------------------------------
 ! R1    R(1,2)                  1.4642         -DE/DX =    0.0                 !
 ! R2    R(1,9)                  1.4598         -DE/DX =    0.0                 !
 ! R3    R(1,16)                 1.3587         -DE/DX =    0.0                 !
 ! R4    R(2,3)                  1.0919         -DE/DX =    0.0                 !
 ! R5    R(2,4)                  1.0895         -DE/DX =    0.0                 !
 ! R6    R(2,5)                  1.5287         -DE/DX =    0.0                 !
 ! R7    R(5,6)                  1.0924         -DE/DX =    0.0                 !
 ! R8    R(5,7)                  1.0904         -DE/DX =    0.0                 !
 ! R9    R(5,8)                  1.0923         -DE/DX =    0.0                 !
 ! R10   R(9,10)                 1.0937         -DE/DX =    0.0                 !
 ! R11   R(9,11)                 1.0921         -DE/DX =    0.0                 !
 ! R12   R(9,12)                 1.5288         -DE/DX =    0.0                 !
 ! R13   R(12,13)                1.0915         -DE/DX =    0.0                 !
 ! R14   R(12,14)                1.0925         -DE/DX =    0.0                 !
 ! R15   R(12,15)                1.0915         -DE/DX =    0.0                 !
 ! R16   R(16,17)                1.1053         -DE/DX =    0.0                 !
 ! R17   R(16,18)                1.2174         -DE/DX =    0.0                 !
 ! A1    A(2,1,9)              119.4308         -DE/DX =    0.0                 !
 ! A2    A(2,1,16)             119.4135         -DE/DX =    0.0                 !
 ! A3    A(9,1,16)             121.135          -DE/DX =    0.0                 !
 ! A4    A(1,2,3)              108.15           -DE/DX =    0.0                 !
 ! A5    A(1,2,4)              107.2465         -DE/DX =    0.0                 !
 ! A6    A(1,2,5)              113.0004         -DE/DX =    0.0                 !
 ! A7    A(3,2,4)              107.7918         -DE/DX =    0.0                 !
 ! A8    A(3,2,5)              110.5676         -DE/DX =    0.0                 !
 ! A9    A(4,2,5)              109.8951         -DE/DX =    0.0                 !
 ! A10   A(2,5,6)              110.1872         -DE/DX =    0.0                 !
 ! A11   A(2,5,7)              110.4374         -DE/DX =    0.0                 !
 ! A12   A(2,5,8)              111.5867         -DE/DX =    0.0                 !
 ! A13   A(6,5,7)              108.1972         -DE/DX =    0.0                 !
 ! A14   A(6,5,8)              107.839          -DE/DX =    0.0                 !
 ! A15   A(7,5,8)              108.4872         -DE/DX =    0.0                 !
 ! A16   A(1,9,10)             108.6243         -DE/DX =    0.0                 !
 ! A17   A(1,9,11)             107.6861         -DE/DX =    0.0                 !
 ! A18   A(1,9,12)             113.9042         -DE/DX =    0.0                 !
 ! A19   A(10,9,11)            106.443          -DE/DX =    0.0                 !
 ! A20   A(10,9,12)            110.1891         -DE/DX =    0.0                 !
 ! A21   A(11,9,12)            109.6982         -DE/DX =    0.0                 !
 ! A22   A(9,12,13)            111.681          -DE/DX =    0.0                 !
 ! A23   A(9,12,14)            110.2025         -DE/DX =    0.0                 !
 ! A24   A(9,12,15)            110.7783         -DE/DX =    0.0                 !
 ! A25   A(13,12,14)           107.7047         -DE/DX =    0.0                 !
 ! A26   A(13,12,15)           108.0459         -DE/DX =    0.0                 !
 ! A27   A(14,12,15)           108.3046         -DE/DX =    0.0                 !
 ! A28   A(1,16,17)            112.3205         -DE/DX =    0.0                 !
 ! A29   A(1,16,18)            125.5657         -DE/DX =    0.0                 !
 ! A30   A(17,16,18)           122.1137         -DE/DX =    0.0                 !
 ! D1    D(9,1,2,3)             35.3183         -DE/DX =    0.0                 !
 ! D2    D(9,1,2,4)            151.3243         -DE/DX =    0.0                 !
 ! D3    D(9,1,2,5)            -87.4191         -DE/DX =    0.0                 !
 ! D4    D(16,1,2,3)          -146.3184         -DE/DX =    0.0                 !
 ! D5    D(16,1,2,4)           -30.3123         -DE/DX =    0.0                 !
 ! D6    D(16,1,2,5)            90.9442         -DE/DX =    0.0                 !
 ! D7    D(2,1,9,10)            44.9093         -DE/DX =    0.0                 !
 ! D8    D(2,1,9,11)           159.8062         -DE/DX =    0.0                 !
 ! D9    D(2,1,9,12)           -78.3022         -DE/DX =    0.0                 !
 ! D10   D(16,1,9,10)         -133.425          -DE/DX =    0.0                 !
 ! D11   D(16,1,9,11)          -18.5282         -DE/DX =    0.0                 !
 ! D12   D(16,1,9,12)          103.3634         -DE/DX =    0.0                 !
 ! D13   D(2,1,16,17)         -178.7164         -DE/DX =    0.0                 !
 ! D14   D(2,1,16,18)            1.3472         -DE/DX =    0.0                 !
 ! D15   D(9,1,16,17)           -0.3818         -DE/DX =    0.0                 !
 ! D16   D(9,1,16,18)          179.6818         -DE/DX =    0.0                 !
 ! D17   D(1,2,5,6)            178.6329         -DE/DX =    0.0                 !
 ! D18   D(1,2,5,7)            -61.8891         -DE/DX =    0.0                 !
 ! D19   D(1,2,5,8)             58.8651         -DE/DX =    0.0                 !
 ! D20   D(3,2,5,6)             57.2518         -DE/DX =    0.0                 !
 ! D21   D(3,2,5,7)            176.7298         -DE/DX =    0.0                 !
 ! D22   D(3,2,5,8)            -62.516          -DE/DX =    0.0                 !
 ! D23   D(4,2,5,6)            -61.6214         -DE/DX =    0.0                 !
 ! D24   D(4,2,5,7)             57.8566         -DE/DX =    0.0                 !
 ! D25   D(4,2,5,8)            178.6108         -DE/DX =    0.0                 !
 ! D26   D(1,9,12,13)           59.4785         -DE/DX =    0.0                 !
 ! D27   D(1,9,12,14)          179.1489         -DE/DX =    0.0                 !
 ! D28   D(1,9,12,15)          -61.0124         -DE/DX =    0.0                 !
 ! D29   D(10,9,12,13)         -62.8771         -DE/DX =    0.0                 !
 ! D30   D(10,9,12,14)          56.7933         -DE/DX =    0.0                 !
 ! D31   D(10,9,12,15)         176.632          -DE/DX =    0.0                 !
 ! D32   D(11,9,12,13)        -179.7482         -DE/DX =    0.0                 !
 ! D33   D(11,9,12,14)         -60.0777         -DE/DX =    0.0                 !
 ! D34   D(11,9,12,15)          59.761          -DE/DX =    0.0                 !
 --------------------------------------------------------------------------------
 GradGradGradGradGradGradGradGradGradGradGradGradGradGradGradGradGradGrad

                          Input orientation:                          
 ---------------------------------------------------------------------
 Center     Atomic      Atomic             Coordinates (Angstroms)
 Number     Number       Type             X           Y           Z
 ---------------------------------------------------------------------
      1          7           0        0.063777    0.181580   -0.068623
      2          6           0       -0.634831   -0.902015    0.625327
      3          1           0        0.108914   -1.504773    1.150538
      4          1           0       -1.280160   -0.443190    1.373634
      5          6           0       -1.466829   -1.774637   -0.314529
      6          1           0       -1.947219   -2.580201    0.245497
      7          1           0       -2.246087   -1.181800   -0.794454
      8          1           0       -0.849390   -2.229731   -1.092252
      9          6           0        1.384908   -0.065758   -0.638320
     10          1           0        1.363557   -1.022775   -1.167410
     11          1           0        1.569341    0.701095   -1.393775
     12          6           0        2.515038   -0.057178    0.391281
     13          1           0        2.365018   -0.816367    1.161055
     14          1           0        3.470971   -0.262554   -0.096070
     15          1           0        2.583015    0.914619    0.883521
     16          6           0       -0.543019    1.390128   -0.200258
     17          1           0        0.077611    2.112593   -0.761130
     18          8           0       -1.641415    1.682198    0.235891
 ---------------------------------------------------------------------
                    Distance matrix (angstroms):
                    1          2          3          4          5
     1  N    0.000000
     2  C    1.464171   0.000000
     3  H    2.081388   1.091935   0.000000
     4  H    2.067997   1.089465   1.762458   0.000000
     5  C    2.495998   1.528731   2.168459   2.158121   0.000000
     6  H    3.430774   2.164010   2.490648   2.506886   1.092400
     7  H    2.778688   2.165687   3.071374   2.485792   1.090425
     8  H    2.774186   2.181500   2.544410   3.075368   1.092335
     9  C    1.459835   2.524971   2.626584   3.360507   3.340287
    10  H    2.085001   2.687386   2.679428   3.712420   3.050211
    11  H    2.071871   3.391918   3.670454   4.133715   4.063539
    12  C    2.505433   3.269588   2.908855   3.939233   4.393529
    13  H    2.793513   3.048514   2.358817   3.670392   4.216477
    14  H    3.436128   4.217455   3.794808   4.976536   5.168751
    15  H    2.791143   3.704235   3.470725   4.124073   5.006861
    16  C    1.358720   2.438020   3.260387   2.526178   3.298821
    17  H    2.051480   3.393774   4.091552   3.596219   4.206579
    18  O    2.291782   2.800541   3.749269   2.437671   3.504732
                    6          7          8          9         10
     6  H    0.000000
     7  H    1.768148   0.000000
     8  H    1.765682   1.771329   0.000000
     9  C    4.266923   3.801849   3.143394   0.000000
    10  H    3.922132   3.632343   2.521810   1.093743   0.000000
    11  H    5.081369   4.296739   3.811944   1.092149   1.750804
    12  C    5.128220   5.033791   4.270859   1.528838   2.165134
    13  H    4.748131   5.021936   4.172219   2.182151   2.543085
    14  H    5.902960   5.832452   4.850534   2.164352   2.483324
    15  H    5.757070   5.525468   5.056879   2.170852   3.073580
    16  C    4.234855   3.141388   3.740708   2.455281   3.223742
    17  H    5.209180   4.031589   4.452500   2.543486   3.413100
    18  O    4.273366   3.103179   4.206478   3.602531   4.279718
                   11         12         13         14         15
    11  H    0.000000
    12  C    2.157717   0.000000
    13  H    3.076191   1.091525   0.000000
    14  H    2.495766   1.092472   1.763577   0.000000
    15  H    2.501840   1.091472   1.766596   1.770254   0.000000
    16  C    2.522165   3.434578   3.895957   4.342157   3.342570
    17  H    2.148913   3.460782   4.183998   4.195059   3.227548
    18  O    3.731934   4.508401   4.811472   5.479849   4.342166
                   16         17         18
    16  C    0.000000
    17  H    1.105312   0.000000
    18  O    1.217376   2.033308   0.000000
 Stoichiometry    C5H11NO
 Framework group  C1[X(C5H11NO)]
 Deg. of freedom    48
 Full point group                 C1      NOp   1
 Largest Abelian subgroup         C1      NOp   1
 Largest concise Abelian subgroup C1      NOp   1
                         Standard orientation:                         
 ---------------------------------------------------------------------
 Center     Atomic      Atomic             Coordinates (Angstroms)
 Number     Number       Type             X           Y           Z
 ---------------------------------------------------------------------
      1          7           0        0.064530   -0.181227    0.071471
      2          6           0       -0.645215    0.890867   -0.629010
      3          1           0        0.092242    1.497848   -1.158210
      4          1           0       -1.286044    0.420852   -1.374234
      5          6           0       -1.485789    1.760855    0.305641
      6          1           0       -1.974471    2.557990   -0.259252
      7          1           0       -2.258869    1.163151    0.789505
      8          1           0       -0.872804    2.227041    1.080313
      9          6           0        1.383226    0.083057    0.639195
     10          1           0        1.352297    1.043095    1.162306
     11          1           0        1.575623   -0.677151    1.399365
     12          6           0        2.513125    0.079514   -0.390689
     13          1           0        2.355213    0.832319   -1.165142
     14          1           0        3.467047    0.297619    0.095068
     15          1           0        2.590836   -0.894599   -0.876874
     16          6           0       -0.529937   -1.395025    0.210841
     17          1           0        0.098135   -2.107638    0.776017
     18          8           0       -1.625422   -1.700944   -0.223129
 ---------------------------------------------------------------------
 Rotational constants (GHZ):      3.0849258      2.0864115      1.4210513

 **********************************************************************

            Population analysis using the SCF density.

 **********************************************************************

 Orbital symmetries:
       Occupied  (A) (A) (A) (A) (A) (A) (A) (A) (A) (A) (A) (A)
                 (A) (A) (A) (A) (A) (A) (A) (A) (A) (A) (A) (A)
                 (A) (A) (A) (A)
       Virtual   (A) (A) (A) (A) (A) (A) (A) (A) (A) (A) (A) (A)
                 (A) (A) (A) (A) (A) (A) (A) (A) (A) (A) (A) (A)
                 (A) (A) (A) (A) (A) (A) (A) (A) (A) (A) (A) (A)
                 (A) (A) (A) (A) (A) (A) (A) (A) (A) (A) (A) (A)
                 (A) (A) (A) (A) (A) (A) (A) (A) (A) (A) (A) (A)
                 (A) (A) (A) (A) (A) (A) (A) (A) (A) (A) (A) (A)
                 (A) (A) (A) (A) (A) (A) (A) (A) (A) (A) (A) (A)
                 (A) (A) (A) (A) (A) (A) (A) (A) (A) (A) (A) (A)
                 (A) (A) (A) (A) (A) (A) (A) (A) (A) (A) (A) (A)
                 (A) (A) (A) (A) (A) (A) (A) (A) (A) (A) (A) (A)
                 (A) (A) (A) (A) (A) (A) (A) (A) (A) (A) (A) (A)
                 (A) (A) (A) (A) (A) (A) (A) (A) (A) (A) (A) (A)
                 (A) (A) (A) (A) (A) (A) (A) (A) (A) (A) (A) (A)
                 (A) (A) (A) (A) (A) (A) (A) (A) (A) (A) (A) (A)
                 (A) (A) (A)
 The electronic state is 1-A.
 Alpha  occ. eigenvalues --  -19.09110 -14.35118 -10.26479 -10.22427 -10.21098
 Alpha  occ. eigenvalues --  -10.17894 -10.16897  -1.03823  -0.94639  -0.78472
 Alpha  occ. eigenvalues --   -0.75551  -0.66048  -0.65425  -0.56175  -0.52673
 Alpha  occ. eigenvalues --   -0.49240  -0.45884  -0.44693  -0.44139  -0.41720
 Alpha  occ. eigenvalues --   -0.40601  -0.39273  -0.38019  -0.37754  -0.36682
 Alpha  occ. eigenvalues --   -0.35641  -0.26029  -0.25087
 Alpha virt. eigenvalues --    0.01213   0.02282   0.04892   0.05967   0.07485
 Alpha virt. eigenvalues --    0.08364   0.09058   0.10610   0.11404   0.11475
 Alpha virt. eigenvalues --    0.12517   0.12799   0.13858   0.14689   0.15524
 Alpha virt. eigenvalues --    0.18555   0.19352   0.19588   0.21046   0.23367
 Alpha virt. eigenvalues --    0.23700   0.25624   0.26665   0.29557   0.30792
 Alpha virt. eigenvalues --    0.31775   0.33656   0.34311   0.37068   0.37438
 Alpha virt. eigenvalues --    0.39671   0.41219   0.41426   0.42024   0.42354
 Alpha virt. eigenvalues --    0.42940   0.43455   0.44423   0.45559   0.47000
 Alpha virt. eigenvalues --    0.47716   0.48725   0.50932   0.51798   0.52953
 Alpha virt. eigenvalues --    0.53971   0.55941   0.56823   0.59337   0.60857
 Alpha virt. eigenvalues --    0.62885   0.63459   0.64887   0.66956   0.74401
 Alpha virt. eigenvalues --    0.79607   0.86769   1.10539   1.15733   1.22128
 Alpha virt. eigenvalues --    1.25093   1.25259   1.26417   1.27202   1.27797
 Alpha virt. eigenvalues --    1.30310   1.30405   1.31705   1.32277   1.34663
 Alpha virt. eigenvalues --    1.35853   1.36293   1.38068   1.40675   1.42618
 Alpha virt. eigenvalues --    1.43900   1.46647   1.46912   1.50179   1.51279
 Alpha virt. eigenvalues --    1.52752   1.53650   1.55730   1.57593   1.60619
 Alpha virt. eigenvalues --    1.64582   1.67010   1.69410   1.70655   1.71987
 Alpha virt. eigenvalues --    1.73960   1.75094   1.77797   1.78003   1.79180
 Alpha virt. eigenvalues --    1.79416   1.80070   1.83148   1.84103   1.86080
 Alpha virt. eigenvalues --    1.89658   1.92689   1.94663   1.95860   1.97723
 Alpha virt. eigenvalues --    2.03882   2.04812   2.12516   2.14316   2.20183
 Alpha virt. eigenvalues --    2.22844   2.25489   2.26283   2.31435   2.32711
 Alpha virt. eigenvalues --    2.34818   2.35364   2.36548   2.37859   2.39767
 Alpha virt. eigenvalues --    2.42767   2.44245   2.47474   2.50922   2.51901
 Alpha virt. eigenvalues --    2.53399   2.55404   2.57412   2.58446   2.60513
 Alpha virt. eigenvalues --    2.63185   2.63627   2.64851   2.66688   2.67370
 Alpha virt. eigenvalues --    2.69385   2.71556   2.73464   2.75914   2.78824
 Alpha virt. eigenvalues --    2.81248   2.82947   2.89755   2.91041   2.95740
 Alpha virt. eigenvalues --    3.04188   3.09186   3.12901   3.14715   3.22178
 Alpha virt. eigenvalues --    3.23455   3.29353   3.31342   3.32843   3.33441
 Alpha virt. eigenvalues --    3.34104   3.35720   3.38396   3.42726   3.47063
 Alpha virt. eigenvalues --    3.49967   3.73763   3.76892   4.27832  21.91127
 Alpha virt. eigenvalues --   21.99797  22.02883  22.11369  22.13754  31.92111
 Alpha virt. eigenvalues --   43.51617
          Condensed to atoms (all electrons):
               1          2          3          4          5          6
     1  N    7.160660   0.146964  -0.053217  -0.041723  -0.029374   0.009674
     2  C    0.146964   5.042601   0.403898   0.419626   0.276065  -0.051193
     3  H   -0.053217   0.403898   0.611287  -0.029111  -0.066857   0.000939
     4  H   -0.041723   0.419626  -0.029111   0.521625  -0.045878  -0.000390
     5  C   -0.029374   0.276065  -0.066857  -0.045878   5.061767   0.404738
     6  H    0.009674  -0.051193   0.000939  -0.000390   0.404738   0.563011
     7  H   -0.007199  -0.037887   0.008408  -0.004518   0.405137  -0.022623
     8  H   -0.003517  -0.030548  -0.006110   0.007556   0.390360  -0.028143
     9  C    0.211400  -0.034779   0.003701   0.009302  -0.015757   0.001023
    10  H   -0.052779   0.005466  -0.006357  -0.000311   0.006394  -0.000793
    11  H   -0.040892   0.010086   0.000637  -0.000241  -0.001590   0.000032
    12  C   -0.075098  -0.022292   0.004949   0.000189  -0.001641   0.000206
    13  H   -0.002412  -0.000300   0.001006  -0.000262   0.000501  -0.000033
    14  H    0.010768   0.001440  -0.000728  -0.000045   0.000120  -0.000010
    15  H    0.005755  -0.000676  -0.000569  -0.000050   0.000184  -0.000009
    16  C    0.250695  -0.029515   0.012517  -0.015282  -0.019409   0.000536
    17  H   -0.155593   0.016730   0.000381   0.001677  -0.004148   0.000044
    18  O   -0.149732   0.021185   0.002257   0.019823  -0.017375  -0.000011
               7          8          9         10         11         12
     1  N   -0.007199  -0.003517   0.211400  -0.052779  -0.040892  -0.075098
     2  C   -0.037887  -0.030548  -0.034779   0.005466   0.010086  -0.022292
     3  H    0.008408  -0.006110   0.003701  -0.006357   0.000637   0.004949
     4  H   -0.004518   0.007556   0.009302  -0.000311  -0.000241   0.000189
     5  C    0.405137   0.390360  -0.015757   0.006394  -0.001590  -0.001641
     6  H   -0.022623  -0.028143   0.001023  -0.000793   0.000032   0.000206
     7  H    0.535274  -0.029148  -0.000049  -0.000067   0.000122  -0.000063
     8  H   -0.029148   0.596687   0.000230   0.000584   0.000000   0.000420
     9  C   -0.000049   0.000230   5.022571   0.426727   0.418505   0.247669
    10  H   -0.000067   0.000584   0.426727   0.600110  -0.033398  -0.085340
    11  H    0.000122   0.000000   0.418505  -0.033398   0.569441  -0.048283
    12  C   -0.000063   0.000420   0.247669  -0.085340  -0.048283   5.135967
    13  H   -0.000021   0.000085  -0.028762  -0.004639   0.007756   0.392815
    14  H    0.000001  -0.000033  -0.042705   0.003927  -0.002238   0.385483
    15  H    0.000001  -0.000023  -0.031222   0.010077  -0.006907   0.383704
    16  C    0.006402  -0.001137  -0.034895   0.003209  -0.011753  -0.004631
    17  H    0.000652   0.000018   0.003187   0.000350   0.011180  -0.007395
    18  O    0.005734   0.000234   0.006037  -0.000137   0.000281   0.000094
              13         14         15         16         17         18
     1  N   -0.002412   0.010768   0.005755   0.250695  -0.155593  -0.149732
     2  C   -0.000300   0.001440  -0.000676  -0.029515   0.016730   0.021185
     3  H    0.001006  -0.000728  -0.000569   0.012517   0.000381   0.002257
     4  H   -0.000262  -0.000045  -0.000050  -0.015282   0.001677   0.019823
     5  C    0.000501   0.000120   0.000184  -0.019409  -0.004148  -0.017375
     6  H   -0.000033  -0.000010  -0.000009   0.000536   0.000044  -0.000011
     7  H   -0.000021   0.000001   0.000001   0.006402   0.000652   0.005734
     8  H    0.000085  -0.000033  -0.000023  -0.001137   0.000018   0.000234
     9  C   -0.028762  -0.042705  -0.031222  -0.034895   0.003187   0.006037
    10  H   -0.004639   0.003927   0.010077   0.003209   0.000350  -0.000137
    11  H    0.007756  -0.002238  -0.006907  -0.011753   0.011180   0.000281
    12  C    0.392815   0.385483   0.383704  -0.004631  -0.007395   0.000094
    13  H    0.573582  -0.025553  -0.027192  -0.001186   0.000021  -0.000020
    14  H   -0.025553   0.567442  -0.021469   0.000346   0.000152  -0.000005
    15  H   -0.027192  -0.021469   0.567803   0.001917   0.000721  -0.000389
    16  C   -0.001186   0.000346   0.001917   4.612202   0.415988   0.594324
    17  H    0.000021   0.000152   0.000721   0.415988   0.727463  -0.055608
    18  O   -0.000020  -0.000005  -0.000389   0.594324  -0.055608   7.950365
 Mulliken charges:
               1
     1  N   -0.184382
     2  C   -0.136870
     3  H    0.112970
     4  H    0.158015
     5  C   -0.343236
     6  H    0.123003
     7  H    0.139843
     8  H    0.102485
     9  C   -0.162182
    10  H    0.126977
    11  H    0.127264
    12  C   -0.306752
    13  H    0.114615
    14  H    0.123106
    15  H    0.118345
    16  C    0.219673
    17  H    0.044181
    18  O   -0.377055
 Sum of Mulliken charges =   0.00000
 Mulliken charges with hydrogens summed into heavy atoms:
               1
     1  N   -0.184382
     2  C    0.134115
     5  C    0.022094
     9  C    0.092059
    12  C    0.049314
    16  C    0.263854
    18  O   -0.377055
 APT charges:
               1
     1  N   -0.796829
     2  C    0.335248
     3  H   -0.030381
     4  H    0.005637
     5  C    0.029560
     6  H   -0.019637
     7  H    0.004836
     8  H   -0.017038
     9  C    0.400258
    10  H   -0.042682
    11  H   -0.026041
    12  C    0.019801
    13  H   -0.005932
    14  H   -0.020968
    15  H   -0.009070
    16  C    1.030886
    17  H   -0.043749
    18  O   -0.813900
 Sum of APT charges =   0.00000
 APT charges with hydrogens summed into heavy atoms:
               1
     1  N   -0.796829
     2  C    0.310504
     5  C   -0.002278
     9  C    0.331535
    12  C   -0.016169
    16  C    0.987137
    18  O   -0.813900
 Electronic spatial extent (au):  <R**2>=            916.1311
 Charge=              0.0000 electrons
 Dipole moment (field-independent basis, Debye):
    X=              3.3191    Y=              2.4523    Z=              0.7876  Tot=              4.2013
 Quadrupole moment (field-independent basis, Debye-Ang):
   XX=            -48.1962   YY=            -47.3231   ZZ=            -44.0999
   XY=             -6.1097   XZ=              0.1416   YZ=             -2.2430
 Traceless Quadrupole moment (field-independent basis, Debye-Ang):
   XX=             -1.6565   YY=             -0.7833   ZZ=              2.4398
   XY=             -6.1097   XZ=              0.1416   YZ=             -2.2430
 Octapole moment (field-independent basis, Debye-Ang**2):
  XXX=              7.9629  YYY=              2.0334  ZZZ=             -0.6574  XYY=              9.5407
  XXY=             10.1519  XXZ=              2.5261  XZZ=             -1.1549  YZZ=             -1.6207
  YYZ=              2.0335  XYZ=              2.3981
 Hexadecapole moment (field-independent basis, Debye-Ang**3):
 XXXX=           -677.2188 YYYY=           -447.5630 ZZZZ=           -135.1253 XXXY=            -11.4354
 XXXZ=              4.6771 YYYX=            -14.8140 YYYZ=             -7.5462 ZZZX=              4.0505
 ZZZY=             -0.8804 XXYY=           -202.9088 XXZZ=           -132.4276 YYZZ=            -91.9601
 XXYZ=             -3.8114 YYXZ=             -0.3194 ZZXY=              2.5815
 N-N= 3.188169382238D+02 E-N=-1.399598207778D+03  KE= 3.256088367427D+02
  Exact polarizability:  80.371   2.872  74.943   3.430  -1.613  59.471
 Approx polarizability: 107.653  11.436 102.681   8.655  -1.412  84.714
 Rotating derivatives to standard orientation.
 Full mass-weighted force constant matrix:
 Low frequencies ---  -16.9193   -8.2711   -0.0008   -0.0004    0.0002    2.1445
 Low frequencies ---   48.5404   71.7236  135.7055
 Diagonal vibrational polarizability:
       13.1427516      21.3598827       6.2817178
 Harmonic frequencies (cm**-1), IR intensities (KM/Mole), Raman scattering
 activities (A**4/AMU), depolarization ratios for plane and unpolarized
 incident light, reduced masses (AMU), force constants (mDyne/A),
 and normal coordinates:
                      1                      2                      3
                      A                      A                      A
 Frequencies --     47.7876                71.7113               135.6952
 Red. masses --      2.5314                 2.7867                 2.6561
 Frc consts  --      0.0034                 0.0084                 0.0288
 IR Inten    --      0.9492                 1.4580                 0.4799
  Atom  AN      X      Y      Z        X      Y      Z        X      Y      Z
     1   7    -0.05  -0.03   0.01    -0.04   0.09   0.07    -0.03   0.02   0.21
     2   6    -0.07  -0.06  -0.01    -0.07   0.05   0.05     0.08   0.00   0.07
     3   1    -0.12  -0.21  -0.25    -0.09   0.05   0.01     0.16  -0.03   0.15
     4   1    -0.26  -0.11   0.19    -0.08   0.02   0.08     0.18  -0.02  -0.01
     5   6     0.21   0.18   0.02    -0.06   0.07   0.04    -0.05   0.07  -0.11
     6   1     0.18   0.14  -0.01    -0.09   0.04   0.03     0.08   0.06  -0.24
     7   1     0.24   0.34   0.27    -0.04   0.07   0.08    -0.16   0.13  -0.22
     8   1     0.40   0.25  -0.18    -0.05   0.10   0.01    -0.16   0.08  -0.03
     9   6    -0.07   0.01   0.02    -0.01   0.11   0.00     0.05  -0.09   0.06
    10   1    -0.11  -0.01   0.05     0.06   0.24  -0.25     0.16  -0.16   0.21
    11   1    -0.04   0.00   0.00    -0.06   0.29   0.19     0.15  -0.21  -0.09
    12   6    -0.06   0.09   0.03    -0.03  -0.24  -0.02    -0.12   0.04  -0.13
    13   1    -0.08   0.12   0.06    -0.02  -0.46  -0.23    -0.16   0.23   0.06
    14   1    -0.07   0.11   0.05     0.00  -0.16  -0.11    -0.01  -0.17  -0.25
    15   1    -0.02   0.11  -0.01    -0.10  -0.39   0.25    -0.30   0.14  -0.37
    16   6     0.00  -0.07  -0.02     0.08   0.02  -0.03     0.00  -0.01   0.06
    17   1     0.03  -0.04  -0.01     0.12   0.06  -0.03    -0.04  -0.03   0.08
    18   8     0.03  -0.13  -0.05     0.13  -0.07  -0.10     0.06  -0.02  -0.09
                      4                      5                      6
                      A                      A                      A
 Frequencies --    215.2457               231.0538               270.6446
 Red. masses --      1.1197                 1.2367                 2.2874
 Frc consts  --      0.0306                 0.0389                 0.0987
 IR Inten    --      0.1714                 2.5080                 5.8891
  Atom  AN      X      Y      Z        X      Y      Z        X      Y      Z
     1   7     0.00  -0.03   0.02    -0.02   0.01  -0.05    -0.01   0.00   0.01
     2   6     0.05   0.00   0.01    -0.01   0.04  -0.01    -0.03   0.05   0.07
     3   1     0.09  -0.01   0.06     0.02   0.04   0.03    -0.01   0.04   0.09
     4   1     0.07   0.04  -0.04     0.00   0.09  -0.05     0.00   0.06   0.04
     5   6     0.04  -0.01   0.00     0.00   0.03   0.01    -0.10   0.13  -0.06
     6   1     0.26   0.16   0.05     0.40   0.35   0.11    -0.06   0.04  -0.23
     7   1    -0.13   0.05  -0.21    -0.30   0.13  -0.36    -0.14   0.20  -0.04
     8   1     0.00  -0.23   0.17    -0.05  -0.38   0.30    -0.17   0.26  -0.08
     9   6    -0.01   0.01   0.01    -0.03   0.02  -0.02     0.03  -0.09  -0.01
    10   1    -0.04   0.03  -0.02    -0.03   0.02  -0.04     0.04  -0.14   0.09
    11   1     0.03   0.04   0.03    -0.05   0.03  -0.01     0.01  -0.16  -0.07
    12   6    -0.04   0.03  -0.03     0.00  -0.01   0.01     0.06   0.00   0.03
    13   1    -0.33  -0.28  -0.27     0.17   0.14   0.13    -0.04  -0.11  -0.06
    14   1    -0.09   0.52  -0.14     0.02  -0.26   0.09     0.00   0.22   0.05
    15   1     0.27  -0.10   0.29    -0.15   0.05  -0.14     0.27  -0.04   0.13
    16   6    -0.02  -0.02   0.01     0.02  -0.01  -0.01     0.09  -0.07  -0.16
    17   1    -0.05  -0.02   0.04     0.08   0.03  -0.02     0.30  -0.19  -0.55
    18   8    -0.01   0.00  -0.02     0.02  -0.08   0.05    -0.04  -0.02   0.13
                      7                      8                      9
                      A                      A                      A
 Frequencies --    323.2211               344.9173               417.7907
 Red. masses --      2.4044                 2.4004                 2.2857
 Frc consts  --      0.1480                 0.1683                 0.2351
 IR Inten    --     10.3665                 3.4230                 2.2572
  Atom  AN      X      Y      Z        X      Y      Z        X      Y      Z
     1   7    -0.03   0.03  -0.10     0.01  -0.02   0.01    -0.04  -0.09   0.07
     2   6     0.13   0.18  -0.03     0.11  -0.01  -0.02     0.09   0.00   0.10
     3   1     0.25   0.25   0.23     0.18   0.00   0.08     0.22   0.00   0.29
     4   1     0.24   0.37  -0.25     0.16   0.05  -0.11     0.18   0.16  -0.07
     5   6     0.01   0.03   0.02     0.09  -0.08  -0.01     0.00   0.03   0.00
     6   1    -0.29  -0.15   0.03    -0.02  -0.11   0.03    -0.03  -0.08  -0.13
     7   1     0.24  -0.16   0.14     0.18  -0.16   0.02     0.01   0.04   0.03
     8   1    -0.02   0.24  -0.08     0.09  -0.03  -0.04    -0.08   0.18  -0.03
     9   6    -0.06  -0.06  -0.01    -0.07   0.10   0.09     0.01   0.13  -0.10
    10   1    -0.03  -0.12   0.09    -0.15   0.18  -0.06    -0.11   0.29  -0.39
    11   1    -0.10  -0.15  -0.08    -0.04   0.23   0.20     0.13   0.39   0.14
    12   6    -0.06  -0.01   0.00    -0.18  -0.01   0.00     0.11   0.04  -0.03
    13   1    -0.13  -0.05  -0.03    -0.19   0.03   0.04     0.32   0.10  -0.02
    14   1    -0.07   0.09  -0.02    -0.06  -0.18  -0.16     0.06  -0.09   0.13
    15   1     0.02  -0.02   0.03    -0.44   0.00  -0.04     0.09   0.05  -0.06
    16   6    -0.04   0.03   0.04     0.09  -0.05  -0.13    -0.09  -0.10   0.01
    17   1    -0.01   0.19   0.22     0.23  -0.17  -0.44    -0.12  -0.14   0.00
    18   8     0.03  -0.18   0.05    -0.03   0.06   0.08    -0.10  -0.06  -0.04
                     10                     11                     12
                      A                      A                      A
 Frequencies --    508.3918               642.6016               773.4092
 Red. masses --      3.2189                 3.4989                 1.5675
 Frc consts  --      0.4902                 0.8513                 0.5524
 IR Inten    --     15.2561                 5.4574                 0.5451
  Atom  AN      X      Y      Z        X      Y      Z        X      Y      Z
     1   7    -0.18   0.16   0.23     0.10   0.05  -0.02     0.02   0.05  -0.01
     2   6     0.00   0.03  -0.14    -0.01   0.04  -0.04     0.11  -0.02   0.11
     3   1     0.08  -0.06  -0.13    -0.19   0.02  -0.31    -0.07  -0.20  -0.34
     4   1     0.04  -0.06  -0.12    -0.13  -0.14   0.17    -0.21  -0.16   0.47
     5   6     0.09  -0.11  -0.02    -0.02   0.01   0.00     0.06  -0.03   0.00
     6   1    -0.09   0.02   0.31    -0.06   0.03   0.07     0.02  -0.22  -0.23
     7   1     0.25  -0.30   0.00     0.00  -0.07  -0.06     0.00  -0.20  -0.28
     8   1     0.23  -0.32  -0.01    -0.05  -0.05   0.06    -0.35   0.16   0.20
     9   6     0.00  -0.01  -0.06     0.22   0.08   0.21    -0.05   0.01  -0.06
    10   1     0.18  -0.07   0.05     0.18   0.10   0.15    -0.04  -0.03   0.01
    11   1     0.00  -0.09  -0.15     0.16   0.08   0.22    -0.03  -0.05  -0.13
    12   6     0.09   0.01  -0.01     0.07   0.01  -0.01    -0.04   0.00   0.00
    13   1     0.22   0.01  -0.04    -0.23  -0.03   0.01     0.11  -0.02  -0.05
    14   1    -0.03   0.08   0.20     0.30  -0.03  -0.44    -0.11  -0.02   0.15
    15   1     0.28   0.01   0.02    -0.23  -0.01  -0.02     0.02  -0.03   0.07
    16   6    -0.02   0.04  -0.07    -0.14   0.04  -0.10    -0.02   0.08  -0.04
    17   1     0.15   0.00  -0.31    -0.14   0.06  -0.08     0.01   0.13  -0.03
    18   8    -0.04  -0.06   0.03    -0.15  -0.18  -0.01    -0.01  -0.04   0.01
                     13                     14                     15
                      A                      A                      A
 Frequencies --    792.0894               827.3839               946.3727
 Red. masses --      1.1907                 1.7307                 2.1613
 Frc consts  --      0.4402                 0.6980                 1.1405
 IR Inten    --      2.0716                17.2981                 4.1483
  Atom  AN      X      Y      Z        X      Y      Z        X      Y      Z
     1   7     0.01   0.01  -0.01     0.00  -0.07   0.02     0.11   0.00   0.03
     2   6    -0.01  -0.05   0.04     0.03   0.09  -0.10     0.05  -0.04  -0.05
     3   1     0.02   0.06   0.20     0.05  -0.16  -0.35    -0.01   0.02  -0.06
     4   1     0.10   0.02  -0.11    -0.19   0.04   0.12     0.18  -0.22  -0.05
     5   6     0.01  -0.03   0.00    -0.03   0.10   0.02    -0.09   0.06   0.02
     6   1     0.12  -0.02  -0.09    -0.32   0.09   0.26    -0.11   0.20   0.24
     7   1    -0.06   0.14   0.10     0.14  -0.32  -0.21    -0.01   0.09   0.17
     8   1     0.11   0.00  -0.10    -0.23   0.00   0.23     0.12  -0.09  -0.04
     9   6    -0.01   0.10   0.00    -0.01   0.04   0.01     0.12   0.00  -0.11
    10   1    -0.04  -0.15   0.45    -0.08  -0.07   0.20     0.22   0.02  -0.13
    11   1     0.10  -0.25  -0.37     0.14  -0.09  -0.15     0.31   0.03  -0.13
    12   6     0.01   0.04  -0.01     0.01   0.03  -0.01    -0.19  -0.01   0.07
    13   1     0.28  -0.18  -0.27     0.17  -0.10  -0.17     0.12   0.04   0.06
    14   1     0.05  -0.17   0.00     0.04  -0.11  -0.02    -0.40   0.00   0.49
    15   1    -0.25  -0.15   0.32    -0.15  -0.08   0.18     0.06  -0.03   0.16
    16   6    -0.01   0.01  -0.01     0.03  -0.14   0.06    -0.02   0.02  -0.03
    17   1     0.00   0.01  -0.02    -0.04  -0.20   0.06    -0.08   0.00   0.01
    18   8    -0.01  -0.01   0.00     0.01   0.04  -0.01    -0.03  -0.03   0.00
                     16                     17                     18
                      A                      A                      A
 Frequencies --    995.2269              1017.5861              1085.1238
 Red. masses --      2.6713                 1.6201                 2.0387
 Frc consts  --      1.5589                 0.9884                 1.4144
 IR Inten    --      0.7756                 0.3909                13.8139
  Atom  AN      X      Y      Z        X      Y      Z        X      Y      Z
     1   7     0.00  -0.01   0.00    -0.01   0.01   0.05     0.10  -0.03   0.01
     2   6    -0.16   0.19   0.05    -0.01   0.02   0.00    -0.01   0.12   0.05
     3   1    -0.23   0.28   0.05    -0.05   0.06  -0.02    -0.21   0.22  -0.11
     4   1    -0.29   0.35   0.06    -0.01   0.01   0.01     0.04  -0.18   0.21
     5   6     0.13  -0.13  -0.09     0.00  -0.02   0.00    -0.02  -0.04  -0.08
     6   1     0.21  -0.24  -0.33     0.06  -0.03  -0.06     0.04   0.13   0.11
     7   1     0.03  -0.08  -0.20    -0.03   0.04   0.01     0.05   0.03   0.11
     8   1     0.01   0.02  -0.09     0.01   0.02  -0.02     0.25  -0.19  -0.20
     9   6     0.13   0.02  -0.05    -0.01   0.00   0.01    -0.12  -0.05   0.13
    10   1     0.25   0.02  -0.04    -0.01   0.00   0.00    -0.21   0.02   0.00
    11   1     0.24   0.02  -0.07     0.01   0.00   0.01     0.10   0.08   0.21
    12   6    -0.09  -0.01   0.07     0.00   0.00  -0.01     0.00   0.01  -0.15
    13   1    -0.03   0.02   0.08     0.03   0.00  -0.02     0.43   0.02  -0.23
    14   1    -0.16   0.01   0.19     0.00  -0.01   0.01    -0.19  -0.06   0.28
    15   1    -0.02  -0.01   0.09     0.01   0.00   0.01     0.27  -0.04   0.00
    16   6     0.00  -0.09   0.06     0.09  -0.07  -0.18    -0.01   0.01   0.01
    17   1    -0.01  -0.18  -0.03    -0.41   0.28   0.82    -0.01  -0.05  -0.06
    18   8    -0.01   0.01  -0.02    -0.02   0.02   0.05     0.00  -0.01   0.00
                     19                     20                     21
                      A                      A                      A
 Frequencies --   1101.3194              1122.4625              1124.3260
 Red. masses --      1.7686                 1.8781                 1.6845
 Frc consts  --      1.2639                 1.3942                 1.2546
 IR Inten    --      1.3634                53.6201                32.0881
  Atom  AN      X      Y      Z        X      Y      Z        X      Y      Z
     1   7     0.01  -0.01   0.00    -0.07  -0.06  -0.05     0.02   0.04  -0.05
     2   6    -0.03   0.02   0.15    -0.10  -0.09   0.04     0.00  -0.03   0.09
     3   1     0.00  -0.06   0.09     0.24  -0.29   0.30     0.03  -0.06   0.09
     4   1     0.07  -0.11   0.16    -0.08   0.26  -0.19     0.04   0.00   0.03
     5   6    -0.01   0.02  -0.14     0.06   0.06  -0.04     0.00   0.03  -0.06
     6   1    -0.21   0.22   0.34    -0.22  -0.02   0.10    -0.14   0.09   0.17
     7   1     0.28  -0.24  -0.01     0.19  -0.27  -0.23     0.15  -0.15  -0.04
     8   1     0.24  -0.36  -0.10    -0.14  -0.04   0.17     0.06  -0.16   0.01
     9   6     0.00  -0.04  -0.10     0.08  -0.02   0.11    -0.03   0.15   0.03
    10   1    -0.19  -0.03  -0.14    -0.01   0.04  -0.03     0.40   0.01   0.31
    11   1    -0.01   0.03  -0.03     0.24   0.05   0.14    -0.31  -0.15  -0.20
    12   6     0.02   0.04   0.08    -0.04   0.01  -0.06     0.00  -0.10  -0.03
    13   1    -0.20  -0.09   0.00     0.26   0.03  -0.10    -0.09   0.15   0.22
    14   1     0.20  -0.06  -0.23    -0.16  -0.05   0.22    -0.13   0.20   0.09
    15   1    -0.31  -0.01   0.12     0.14  -0.04   0.08     0.34   0.07  -0.31
    16   6     0.00   0.02  -0.02     0.01   0.11  -0.05     0.00  -0.08   0.01
    17   1    -0.03   0.07   0.07     0.04   0.21   0.05    -0.07  -0.10   0.07
    18   8     0.00   0.00   0.00     0.02   0.00   0.01    -0.02   0.00  -0.01
                     22                     23                     24
                      A                      A                      A
 Frequencies --   1240.8687              1285.5513              1338.1800
 Red. masses --      2.6938                 1.5451                 1.2382
 Frc consts  --      2.4438                 1.5044                 1.3064
 IR Inten    --     28.1922                54.0747                15.5052
  Atom  AN      X      Y      Z        X      Y      Z        X      Y      Z
     1   7     0.23  -0.01   0.13     0.00   0.11  -0.04    -0.08   0.03  -0.04
     2   6    -0.16  -0.03  -0.07     0.00  -0.05   0.02     0.02  -0.04   0.01
     3   1    -0.12   0.27   0.33    -0.12   0.15   0.08    -0.36   0.48   0.07
     4   1     0.16  -0.06  -0.31     0.12  -0.11  -0.06     0.31  -0.41  -0.02
     5   6     0.11   0.07   0.02     0.03   0.03   0.00     0.05   0.04   0.00
     6   1    -0.17  -0.15  -0.05    -0.06  -0.04  -0.02    -0.08  -0.04   0.00
     7   1     0.08  -0.19  -0.33     0.05  -0.07  -0.08     0.07  -0.08  -0.11
     8   1    -0.26   0.13   0.26    -0.06  -0.01   0.09    -0.11   0.02   0.13
     9   6    -0.12   0.00  -0.06     0.01  -0.08   0.02     0.01   0.00   0.02
    10   1    -0.20  -0.05   0.03     0.49   0.06  -0.21    -0.23  -0.02   0.03
    11   1    -0.18  -0.03  -0.07    -0.49   0.03   0.26     0.41   0.04  -0.05
    12   6     0.02  -0.02   0.00    -0.02   0.10  -0.02     0.01  -0.03   0.00
    13   1    -0.10  -0.01   0.03     0.18  -0.09  -0.24    -0.05   0.02   0.07
    14   1     0.02   0.03  -0.03     0.01  -0.18   0.05     0.00   0.02   0.00
    15   1    -0.03   0.02  -0.08    -0.13  -0.05   0.26     0.06   0.00  -0.05
    16   6    -0.01   0.06  -0.02     0.00  -0.09   0.03     0.00  -0.05   0.02
    17   1    -0.21  -0.16  -0.07    -0.06  -0.14   0.02     0.19   0.13   0.04
    18   8    -0.03  -0.04   0.00    -0.01   0.00  -0.01    -0.01   0.02  -0.01
                     25                     26                     27
                      A                      A                      A
 Frequencies --   1386.3601              1404.2259              1415.0838
 Red. masses --      1.2624                 1.2759                 1.2548
 Frc consts  --      1.4295                 1.4823                 1.4804
 IR Inten    --     12.1054                 8.6811                 3.5562
  Atom  AN      X      Y      Z        X      Y      Z        X      Y      Z
     1   7     0.01   0.00  -0.03     0.02  -0.03   0.02    -0.01   0.01  -0.01
     2   6    -0.06   0.07   0.01     0.05  -0.07  -0.01    -0.03   0.04   0.02
     3   1     0.25  -0.33  -0.01    -0.20   0.29   0.05     0.11  -0.17  -0.03
     4   1     0.29  -0.35  -0.04    -0.33   0.37   0.05     0.19  -0.19  -0.03
     5   6     0.00   0.00   0.04     0.01  -0.01  -0.05     0.08  -0.08  -0.06
     6   1     0.07  -0.09  -0.15    -0.13   0.08   0.20    -0.20   0.11   0.42
     7   1    -0.02  -0.09  -0.12    -0.01   0.17   0.15    -0.20   0.44   0.15
     8   1     0.11   0.01  -0.06    -0.16  -0.01   0.10    -0.40   0.26   0.13
     9   6    -0.10  -0.01   0.02    -0.10  -0.01   0.02     0.02   0.00  -0.01
    10   1     0.49   0.08  -0.12     0.47   0.09  -0.13    -0.08  -0.01   0.01
    11   1     0.43   0.02  -0.09     0.36  -0.01  -0.11    -0.07   0.00   0.02
    12   6     0.00   0.01   0.04     0.02   0.01   0.03    -0.04   0.00   0.03
    13   1     0.05  -0.09  -0.07    -0.01  -0.10  -0.08     0.19  -0.03  -0.05
    14   1     0.10   0.01  -0.15     0.08  -0.02  -0.08     0.08  -0.02  -0.19
    15   1     0.00   0.07  -0.10    -0.03   0.06  -0.08     0.17   0.06  -0.06
    16   6     0.00   0.00   0.00    -0.01   0.01  -0.01     0.00  -0.01   0.00
    17   1     0.01   0.02   0.01     0.10   0.11  -0.01    -0.05  -0.06   0.00
    18   8    -0.01   0.00   0.00     0.00   0.00   0.00     0.00   0.00   0.00
                     28                     29                     30
                      A                      A                      A
 Frequencies --   1420.4415              1428.3553              1457.7171
 Red. masses --      1.2378                 1.2523                 1.9176
 Frc consts  --      1.4715                 1.5053                 2.4008
 IR Inten    --     17.2630                52.5224                54.3619
  Atom  AN      X      Y      Z        X      Y      Z        X      Y      Z
     1   7     0.00   0.02   0.00    -0.02   0.09  -0.04     0.10   0.18  -0.01
     2   6     0.02  -0.03   0.00     0.01  -0.03   0.02    -0.02  -0.04   0.03
     3   1    -0.06   0.10   0.03     0.00  -0.06  -0.05     0.13  -0.36  -0.15
     4   1    -0.11   0.12   0.02    -0.01   0.11  -0.06    -0.05   0.40  -0.23
     5   6    -0.03   0.03   0.02     0.00   0.00  -0.01    -0.01  -0.01   0.00
     6   1     0.07  -0.03  -0.15     0.00   0.00   0.01     0.00  -0.02  -0.02
     7   1     0.09  -0.16  -0.04     0.01   0.03   0.05    -0.01   0.04   0.06
     8   1     0.13  -0.10  -0.03    -0.03  -0.02   0.03     0.00  -0.05   0.02
     9   6     0.02   0.00  -0.01    -0.02  -0.02   0.03    -0.04  -0.05  -0.02
    10   1    -0.16  -0.03   0.03    -0.15   0.05  -0.11    -0.31  -0.13   0.13
    11   1     0.00   0.02   0.02     0.36  -0.01  -0.07     0.34   0.21   0.17
    12   6    -0.10   0.00   0.08     0.03  -0.01  -0.01     0.00  -0.01   0.00
    13   1     0.44  -0.11  -0.16    -0.12   0.03   0.06    -0.04  -0.04  -0.02
    14   1     0.21  -0.07  -0.48    -0.04   0.02   0.10    -0.03   0.00   0.05
    15   1     0.44   0.17  -0.21    -0.08  -0.04   0.03     0.00   0.02  -0.07
    16   6     0.00   0.00   0.00    -0.01   0.01  -0.01     0.01  -0.12   0.05
    17   1    -0.14  -0.13  -0.03    -0.63  -0.58  -0.11     0.38   0.23   0.11
    18   8     0.01   0.00   0.00     0.05  -0.01   0.03    -0.07   0.00  -0.04
                     31                     32                     33
                      A                      A                      A
 Frequencies --   1483.0278              1495.1871              1497.1797
 Red. masses --      1.0779                 1.0756                 1.0753
 Frc consts  --      1.3968                 1.4168                 1.4201
 IR Inten    --      8.5312                 3.2772                 2.4745
  Atom  AN      X      Y      Z        X      Y      Z        X      Y      Z
     1   7     0.00   0.03  -0.02     0.02   0.03   0.00     0.02   0.03   0.00
     2   6     0.01   0.00  -0.05    -0.01  -0.01  -0.02    -0.01   0.00  -0.01
     3   1     0.27   0.10   0.47     0.11   0.02   0.20     0.08   0.01   0.13
     4   1    -0.32  -0.22   0.38    -0.13  -0.05   0.11    -0.09  -0.03   0.07
     5   6     0.00  -0.01   0.00    -0.02  -0.03   0.01    -0.01   0.00  -0.01
     6   1    -0.04   0.03   0.09     0.26   0.28   0.19     0.08   0.05   0.00
     7   1    -0.09   0.01  -0.12     0.06  -0.22  -0.12     0.06  -0.05   0.05
     8   1     0.05   0.10  -0.10    -0.05   0.38  -0.21    -0.05   0.03   0.01
     9   6     0.00  -0.01  -0.03    -0.01   0.00   0.03     0.00  -0.02   0.03
    10   1     0.01  -0.15   0.25    -0.08   0.12  -0.21    -0.08   0.15  -0.30
    11   1     0.08   0.24   0.22     0.04  -0.18  -0.19    -0.02  -0.22  -0.17
    12   6     0.01  -0.01   0.01    -0.01   0.02  -0.02    -0.01  -0.04  -0.01
    13   1     0.03  -0.11  -0.11    -0.23   0.06   0.08     0.43   0.25   0.17
    14   1    -0.07   0.14   0.09     0.08  -0.36  -0.01    -0.03   0.53  -0.20
    15   1    -0.17   0.07  -0.18     0.29  -0.05   0.18    -0.31  -0.11   0.12
    16   6     0.01  -0.01   0.01     0.01  -0.02   0.01     0.01  -0.02   0.01
    17   1    -0.06  -0.06   0.01     0.06   0.03   0.02     0.08   0.04   0.02
    18   8    -0.01   0.00   0.00    -0.02   0.00  -0.01    -0.02   0.00  -0.01
                     34                     35                     36
                      A                      A                      A
 Frequencies --   1499.5275              1506.7522              1510.6930
 Red. masses --      1.0523                 1.0597                 1.0811
 Frc consts  --      1.3941                 1.4175                 1.4536
 IR Inten    --      9.2623                 6.8629                 7.5247
  Atom  AN      X      Y      Z        X      Y      Z        X      Y      Z
     1   7    -0.01  -0.02   0.00     0.00   0.00   0.00     0.00  -0.01   0.00
     2   6    -0.01  -0.02   0.03     0.02  -0.02   0.03     0.00   0.00   0.00
     3   1    -0.17   0.01  -0.19    -0.15   0.03  -0.15    -0.03   0.02  -0.02
     4   1     0.16   0.08  -0.19     0.05   0.16  -0.10     0.02   0.00  -0.02
     5   6    -0.02  -0.02   0.00     0.02  -0.01   0.04    -0.01   0.00  -0.01
     6   1     0.37   0.32   0.13    -0.28  -0.02   0.25     0.15   0.10   0.00
     7   1     0.20  -0.27   0.01    -0.37   0.02  -0.54     0.12  -0.08   0.11
     8   1    -0.16   0.36  -0.11     0.32   0.22  -0.36    -0.11   0.06   0.04
     9   6     0.01   0.00  -0.01    -0.01   0.00  -0.01    -0.04  -0.01  -0.05
    10   1     0.06  -0.06   0.11     0.04  -0.02   0.03     0.21  -0.20   0.33
    11   1    -0.03   0.09   0.10     0.02   0.04   0.03     0.11   0.33   0.26
    12   6     0.01  -0.01   0.02     0.00  -0.01   0.00    -0.01  -0.01  -0.03
    13   1     0.10  -0.19  -0.19     0.10   0.09   0.07     0.07   0.36   0.32
    14   1    -0.09   0.21   0.10     0.01   0.10  -0.08     0.10   0.01  -0.24
    15   1    -0.23   0.12  -0.27    -0.04  -0.05   0.08     0.11  -0.21   0.41
    16   6    -0.01   0.01  -0.01    -0.01   0.00  -0.01    -0.01   0.01  -0.01
    17   1    -0.03  -0.01  -0.01    -0.02   0.00  -0.01    -0.05  -0.02  -0.02
    18   8     0.01   0.00   0.00     0.01   0.00   0.00     0.01   0.00   0.01
                     37                     38                     39
                      A                      A                      A
 Frequencies --   1750.0191              2935.9877              3033.1524
 Red. masses --      8.0925                 1.0837                 1.0557
 Frc consts  --     14.6022                 5.5039                 5.7222
 IR Inten    --    449.1894                88.9212                15.2348
  Atom  AN      X      Y      Z        X      Y      Z        X      Y      Z
     1   7    -0.09  -0.05  -0.03     0.00   0.00   0.00     0.00   0.00   0.00
     2   6     0.03  -0.01   0.02     0.00   0.00   0.00     0.00   0.00  -0.01
     3   1    -0.18   0.10  -0.16    -0.01  -0.01   0.01    -0.07  -0.06   0.05
     4   1     0.06   0.11  -0.05     0.00   0.00   0.01     0.03   0.03   0.04
     5   6     0.00   0.00  -0.01     0.00   0.00   0.00    -0.01   0.02   0.02
     6   1    -0.04   0.01   0.04     0.00   0.00   0.00     0.13  -0.21   0.15
     7   1    -0.01   0.04   0.02     0.00   0.00   0.00     0.17   0.13  -0.10
     8   1     0.01  -0.03   0.00     0.00   0.00   0.00    -0.19  -0.14  -0.23
     9   6    -0.02  -0.01   0.00     0.00   0.00   0.00     0.00  -0.03  -0.05
    10   1     0.10  -0.04   0.04     0.00  -0.02   0.00    -0.03   0.65   0.34
    11   1     0.04   0.05   0.01     0.00   0.04  -0.03     0.07  -0.28   0.26
    12   6     0.01   0.00   0.00     0.00   0.00   0.00     0.00   0.00   0.01
    13   1     0.00   0.00   0.01     0.00   0.00   0.00    -0.02   0.08  -0.07
    14   1     0.02   0.01  -0.03     0.00   0.00   0.00     0.03   0.01   0.01
    15   1    -0.02   0.00   0.01     0.00   0.00   0.00     0.01  -0.14  -0.07
    16   6     0.57   0.23   0.20    -0.04   0.06  -0.04     0.00   0.00   0.00
    17   1    -0.22  -0.50   0.07     0.55  -0.66   0.51     0.02  -0.02   0.01
    18   8    -0.35  -0.10  -0.14     0.00   0.00   0.00     0.00   0.00   0.00
                     40                     41                     42
                      A                      A                      A
 Frequencies --   3036.0780              3037.0725              3055.8398
 Red. masses --      1.0356                 1.0426                 1.0644
 Frc consts  --      5.6243                 5.6658                 5.8563
 IR Inten    --     10.1633                42.6727                25.0185
  Atom  AN      X      Y      Z        X      Y      Z        X      Y      Z
     1   7     0.00   0.00   0.00     0.00   0.00   0.00     0.00   0.00   0.00
     2   6     0.00   0.00  -0.01     0.00   0.00   0.00    -0.03  -0.03   0.06
     3   1    -0.07  -0.06   0.05    -0.02  -0.02   0.02     0.60   0.49  -0.41
     4   1     0.02   0.01   0.02    -0.01  -0.01  -0.01    -0.26  -0.18  -0.28
     5   6     0.01  -0.02  -0.01     0.02  -0.03  -0.02     0.00   0.01  -0.01
     6   1    -0.12   0.20  -0.15    -0.21   0.33  -0.25     0.04  -0.07   0.05
     7   1    -0.14  -0.12   0.09    -0.25  -0.20   0.15    -0.08  -0.06   0.05
     8   1     0.17   0.12   0.20     0.27   0.19   0.33     0.02   0.01   0.02
     9   6     0.00   0.00  -0.01     0.00  -0.02  -0.03     0.00   0.00  -0.01
    10   1     0.00   0.05   0.03    -0.01   0.39   0.20     0.00   0.08   0.04
    11   1     0.01  -0.03   0.03     0.05  -0.18   0.17     0.02  -0.07   0.07
    12   6    -0.03   0.00   0.03     0.02   0.00  -0.01     0.00   0.00   0.00
    13   1    -0.08   0.34  -0.34     0.04  -0.15   0.16    -0.01   0.02  -0.02
    14   1     0.46   0.11   0.25    -0.27  -0.06  -0.15     0.06   0.01   0.03
    15   1     0.03  -0.45  -0.21    -0.01   0.18   0.09     0.00  -0.08  -0.04
    16   6     0.00   0.00   0.00     0.00   0.00   0.00     0.00   0.00   0.00
    17   1     0.00   0.00   0.00     0.01  -0.02   0.01     0.01  -0.01   0.01
    18   8     0.00   0.00   0.00     0.00   0.00   0.00     0.00   0.00   0.00
                     43                     44                     45
                      A                      A                      A
 Frequencies --   3072.5685              3092.0387              3101.0768
 Red. masses --      1.1010                 1.1018                 1.1009
 Frc consts  --      6.1241                 6.2064                 6.2377
 IR Inten    --      8.1030                15.8074                37.2881
  Atom  AN      X      Y      Z        X      Y      Z        X      Y      Z
     1   7     0.00   0.00   0.00     0.00   0.00   0.00     0.00   0.00   0.00
     2   6     0.00   0.00   0.00    -0.03  -0.02  -0.01     0.00   0.00   0.00
     3   1    -0.02  -0.02   0.02     0.15   0.12  -0.11    -0.02  -0.02   0.01
     4   1     0.00   0.00   0.00     0.20   0.14   0.23     0.01   0.00   0.01
     5   6     0.00   0.00   0.00     0.06   0.00   0.06     0.00   0.00   0.00
     6   1     0.01  -0.01   0.01    -0.26   0.44  -0.31     0.01  -0.01   0.01
     7   1     0.02   0.01  -0.01    -0.11  -0.10   0.09     0.01   0.01   0.00
     8   1     0.01   0.01   0.01    -0.38  -0.29  -0.47     0.02   0.02   0.02
     9   6    -0.01   0.08  -0.03     0.00   0.00   0.00     0.00   0.01  -0.01
    10   1     0.01  -0.38  -0.21     0.00  -0.02  -0.01     0.00   0.03   0.01
    11   1     0.15  -0.58   0.57     0.01  -0.02   0.02     0.03  -0.11   0.11
    12   6     0.01  -0.03   0.01     0.00   0.00   0.00    -0.06  -0.01  -0.07
    13   1    -0.04   0.19  -0.19     0.00  -0.01   0.01     0.07  -0.36   0.35
    14   1    -0.06  -0.02  -0.03     0.03   0.01   0.01     0.66   0.15   0.34
    15   1    -0.01   0.18   0.09     0.00   0.00   0.00    -0.04   0.32   0.14
    16   6     0.00   0.00   0.00     0.00   0.00   0.00     0.00   0.00   0.00
    17   1     0.02  -0.02   0.02     0.00   0.00   0.00     0.00  -0.01   0.00
    18   8     0.00   0.00   0.00     0.00   0.00   0.00     0.00   0.00   0.00
                     46                     47                     48
                      A                      A                      A
 Frequencies --   3108.8254              3110.1035              3122.9155
 Red. masses --      1.0980                 1.1039                 1.1042
 Frc consts  --      6.2526                 6.2911                 6.3451
 IR Inten    --     21.7682                29.5911                22.0649
  Atom  AN      X      Y      Z        X      Y      Z        X      Y      Z
     1   7     0.00   0.00   0.00     0.00   0.00   0.00     0.00   0.00   0.00
     2   6    -0.04  -0.03  -0.03     0.00   0.00   0.00    -0.05  -0.04  -0.02
     3   1     0.10   0.09  -0.08    -0.02  -0.02   0.01     0.24   0.19  -0.17
     4   1     0.37   0.27   0.43     0.00   0.00   0.00     0.33   0.24   0.38
     5   6     0.01   0.05  -0.05    -0.01  -0.01   0.00    -0.05  -0.05   0.01
     6   1     0.22  -0.35   0.25    -0.02   0.03  -0.03    -0.07   0.10  -0.08
     7   1    -0.40  -0.31   0.24     0.08   0.06  -0.05     0.45   0.35  -0.28
     8   1     0.05   0.05   0.05     0.02   0.01   0.02     0.20   0.15   0.26
     9   6     0.00   0.00   0.00     0.00   0.03  -0.01     0.00   0.00   0.00
    10   1     0.00  -0.02  -0.01     0.01  -0.18  -0.10     0.00   0.03   0.02
    11   1     0.01  -0.02   0.02     0.04  -0.17   0.17     0.00   0.01  -0.01
    12   6     0.00   0.01   0.00     0.00   0.09   0.00     0.00  -0.01   0.00
    13   1     0.01  -0.03   0.03     0.09  -0.40   0.43    -0.01   0.04  -0.04
    14   1    -0.02   0.00  -0.01    -0.10  -0.01  -0.05     0.00   0.00   0.00
    15   1     0.00  -0.06  -0.03     0.05  -0.63  -0.32     0.00   0.04   0.02
    16   6     0.00   0.00   0.00     0.00   0.00   0.00     0.00   0.00   0.00
    17   1     0.00   0.00   0.00     0.01  -0.01   0.01     0.00   0.00   0.00
    18   8     0.00   0.00   0.00     0.00   0.00   0.00     0.00   0.00   0.00

 -------------------
 - Thermochemistry -
 -------------------
 Temperature   298.150 Kelvin.  Pressure   1.00000 Atm.
 Atom     1 has atomic number  7 and mass  14.00307
 Atom     2 has atomic number  6 and mass  12.00000
 Atom     3 has atomic number  1 and mass   1.00783
 Atom     4 has atomic number  1 and mass   1.00783
 Atom     5 has atomic number  6 and mass  12.00000
 Atom     6 has atomic number  1 and mass   1.00783
 Atom     7 has atomic number  1 and mass   1.00783
 Atom     8 has atomic number  1 and mass   1.00783
 Atom     9 has atomic number  6 and mass  12.00000
 Atom    10 has atomic number  1 and mass   1.00783
 Atom    11 has atomic number  1 and mass   1.00783
 Atom    12 has atomic number  6 and mass  12.00000
 Atom    13 has atomic number  1 and mass   1.00783
 Atom    14 has atomic number  1 and mass   1.00783
 Atom    15 has atomic number  1 and mass   1.00783
 Atom    16 has atomic number  6 and mass  12.00000
 Atom    17 has atomic number  1 and mass   1.00783
 Atom    18 has atomic number  8 and mass  15.99491
 Molecular mass:   101.08406 amu.
 Principal axes and moments of inertia in atomic units:
                           1         2         3
     Eigenvalues --   585.01932 864.997741270.00429
           X            0.99354  -0.11326  -0.00665
           Y            0.11319   0.99353  -0.00945
           Z            0.00767   0.00864   0.99993
 This molecule is an asymmetric top.
 Rotational symmetry number  1.
 Warning -- assumption of classical behavior for rotation
           may cause significant error
 Rotational temperatures (Kelvin)      0.14805     0.10013     0.06820
 Rotational constants (GHZ):           3.08493     2.08641     1.42105
 Zero-point vibrational energy     417611.5 (Joules/Mol)
                                   99.81154 (Kcal/Mol)
 Warning -- explicit consideration of  10 degrees of freedom as
           vibrations may cause significant error
 Vibrational temperatures:     68.76   103.18   195.23   309.69   332.43
          (Kelvin)            389.40   465.04   496.26   601.11   731.46
                              924.56  1112.76  1139.64  1190.42  1361.62
                             1431.91  1464.08  1561.25  1584.55  1614.97
                             1617.65  1785.33  1849.62  1925.34  1994.66
                             2020.37  2035.99  2043.70  2055.08  2097.33
                             2133.74  2151.24  2154.10  2157.48  2167.88
                             2173.55  2517.88  4224.23  4364.02  4368.23
                             4369.66  4396.67  4420.74  4448.75  4461.75
                             4472.90  4474.74  4493.17
 
 Zero-point correction=                           0.159060 (Hartree/Particle)
 Thermal correction to Energy=                    0.167667
 Thermal correction to Enthalpy=                  0.168612
 Thermal correction to Gibbs Free Energy=         0.125433
 Sum of electronic and zero-point Energies=           -327.103530
 Sum of electronic and thermal Energies=              -327.094922
 Sum of electronic and thermal Enthalpies=            -327.093978
 Sum of electronic and thermal Free Energies=         -327.137156
 
                     E (Thermal)             CV                S
                      KCal/Mol        Cal/Mol-Kelvin    Cal/Mol-Kelvin
 Total                  105.213             29.770             90.877
 Electronic               0.000              0.000              0.000
 Translational            0.889              2.981             39.750
 Rotational               0.889              2.981             27.954
 Vibrational            103.435             23.809             23.173
 Vibration     1          0.595              1.978              4.907
 Vibration     2          0.598              1.967              4.106
 Vibration     3          0.614              1.918              2.864
 Vibration     4          0.645              1.818              1.999
 Vibration     5          0.653              1.794              1.871
 Vibration     6          0.674              1.727              1.592
 Vibration     7          0.708              1.629              1.294
 Vibration     8          0.723              1.586              1.189
 Vibration     9          0.781              1.432              0.900
 Vibration    10          0.864              1.231              0.637
                       Q            Log10(Q)             Ln(Q)
 Total Bot       0.201815D-57        -57.695047       -132.847756
 Total V=0       0.293247D+16         15.467234         35.614621
 Vib (Bot)       0.176048D-70        -70.754368       -162.917954
 Vib (Bot)    1  0.432678D+01          0.636164          1.464823
 Vib (Bot)    2  0.287534D+01          0.458689          1.056171
 Vib (Bot)    3  0.150019D+01          0.176146          0.405591
 Vib (Bot)    4  0.920781D+00         -0.035844         -0.082533
 Vib (Bot)    5  0.852042D+00         -0.069539         -0.160120
 Vib (Bot)    6  0.713844D+00         -0.146397         -0.337091
 Vib (Bot)    7  0.580467D+00         -0.236222         -0.543922
 Vib (Bot)    8  0.536665D+00         -0.270297         -0.622381
 Vib (Bot)    9  0.420989D+00         -0.375729         -0.865148
 Vib (Bot)   10  0.320865D+00         -0.493678         -1.136735
 Vib (V=0)       0.255807D+03          2.407913          5.544424
 Vib (V=0)    1  0.485557D+01          0.686240          1.580127
 Vib (V=0)    2  0.341849D+01          0.533834          1.229199
 Vib (V=0)    3  0.208132D+01          0.318338          0.733001
 Vib (V=0)    4  0.154778D+01          0.189709          0.436820
 Vib (V=0)    5  0.148791D+01          0.172578          0.397375
 Vib (V=0)    6  0.137153D+01          0.137207          0.315931
 Vib (V=0)    7  0.126612D+01          0.102475          0.235958
 Vib (V=0)    8  0.123349D+01          0.091136          0.209849
 Vib (V=0)    9  0.115363D+01          0.062066          0.142913
 Vib (V=0)   10  0.109410D+01          0.039057          0.089932
 Electronic      0.100000D+01          0.000000          0.000000
 Translational   0.399465D+08          7.601479         17.503053
 Rotational      0.286973D+06          5.457842         12.567145
 ***** Axes restored to original set *****
 -------------------------------------------------------------------
 Center     Atomic                   Forces (Hartrees/Bohr)
 Number     Number              X              Y              Z
 -------------------------------------------------------------------
      1        7          -0.000000595   -0.000000362   -0.000002258
      2        6           0.000000355    0.000001385    0.000001709
      3        1           0.000000833    0.000004416    0.000004569
      4        1          -0.000000724    0.000003477   -0.000000551
      5        6           0.000002064   -0.000003447    0.000004615
      6        1           0.000002809   -0.000001836    0.000007460
      7        1           0.000001605   -0.000006368    0.000001766
      8        1           0.000003194   -0.000005657    0.000006797
      9        6           0.000000001   -0.000000981   -0.000000235
     10        1           0.000001647   -0.000003086    0.000003448
     11        1          -0.000000494   -0.000003677   -0.000003225
     12        6          -0.000000640    0.000004615    0.000000374
     13        1          -0.000000133    0.000007424    0.000003279
     14        1          -0.000000023    0.000003917    0.000001788
     15        1          -0.000002205    0.000006612   -0.000003426
     16        6          -0.000002133   -0.000001822   -0.000007246
     17        1          -0.000002742   -0.000003133   -0.000009740
     18        8          -0.000002819   -0.000001475   -0.000009122
 -------------------------------------------------------------------
 Cartesian Forces:  Max     0.000009740 RMS     0.000003814
 1\1\GINC-SRVMBFD\Freq\RB3LYP\TZVP\C5H11N1O1\JENS\20-Sep-2014\0\\# opt=
 (calcall,tight) freq b3lyp geom=connectivity tzvp\\Title Card Required
 \\0,1\N,0.0637773258,0.1815795044,-0.0686226418\C,-0.6348309066,-0.902
 0150448,0.6253267138\H,0.1089143571,-1.5047732735,1.1505383784\H,-1.28
 01603268,-0.4431904005,1.3736342704\C,-1.4668290797,-1.7746366719,-0.3
 145285414\H,-1.9472186058,-2.5802014679,0.2454974785\H,-2.2460867918,-
 1.1817995395,-0.7944536592\H,-0.8493899326,-2.2297310156,-1.092252318\
 C,1.384908495,-0.0657579762,-0.6383203361\H,1.3635568285,-1.0227749626
 ,-1.1674101761\H,1.56934137,0.7010947597,-1.3937749746\C,2.5150383048,
 -0.057178268,0.3912805057\H,2.3650182925,-0.8163674948,1.1610553517\H,
 3.4709706436,-0.2625535833,-0.096069927\H,2.583014569,0.9146190705,0.8
 835214699\C,-0.5430188386,1.3901283301,-0.2002583976\H,0.0776112046,2.
 1125933327,-0.7611299537\O,-1.6414149091,1.6821977012,0.2358907572\\Ve
 rsion=EM64L-G09RevD.01\State=1-A\HF=-327.2625895\RMSD=4.588e-09\RMSF=3
 .814e-06\ZeroPoint=0.1590598\Thermal=0.1676674\Dipole=1.3154528,-0.949
 5688,-0.316205\DipoleDeriv=-0.8860615,0.1824825,0.0353245,0.425136,-1.
 1183659,0.0029906,-0.0330214,0.1564821,-0.3860601,0.2873615,0.2492947,
 0.0261665,0.2348157,0.4538252,-0.056912,0.0637423,-0.1504533,0.2645572
 ,-0.0556861,0.0436729,-0.1146187,0.0331468,-0.0472792,0.0550822,-0.078
 4964,0.0531848,0.0118223,-0.0029553,-0.0470296,0.0660113,0.0025156,0.0
 264595,-0.0798263,0.0300872,-0.0175427,-0.0065922,0.0415147,-0.0558111
 ,-0.0481124,-0.0441923,0.0199576,-0.0137675,-0.0895084,-0.014737,0.027
 2087,0.0214855,-0.0993143,0.0317689,-0.0913064,-0.0805196,0.0623101,0.
 0541941,0.0826855,0.0001235,-0.0182413,0.0327249,-0.0628258,0.0830595,
 0.0109564,0.0455173,-0.0576029,0.0104075,0.0217937,-0.0285817,0.060673
 3,0.099579,0.0270173,0.0300765,-0.0583814,0.0566541,-0.0822942,-0.0526
 084,0.7475736,-0.0901183,-0.0143147,-0.0853138,0.1601672,0.0518254,-0.
 0692196,0.0958592,0.2930323,-0.0311976,0.0029932,-0.0367304,0.0376291,
 -0.0962792,-0.1183476,-0.0040918,-0.0905483,-0.000568,-0.0173564,0.006
 2816,-0.005324,-0.0493179,-0.0259859,0.1287971,0.0189958,0.0685401,-0.
 0347818,-0.0534716,0.0179056,-0.0516006,0.0072488,0.1002946,-0.0043497
 ,-0.0800391,-0.016015,0.0125806,0.0611356,-0.0495168,0.030922,-0.02255
 33,-0.0381107,0.100691,-0.0106007,0.082555,-0.0408205,-0.1437434,0.042
 7599,0.0558974,0.0398763,0.0688392,-0.0202402,0.0874529,-0.0182483,0.0
 119996,0.048311,0.0241654,-0.0090712,-0.0275766,-0.0897963,-0.0851645,
 -0.0356882,-0.0542075,0.0142746,1.3338475,-0.7841577,-0.3098458,-0.722
 2938,1.4102142,-0.0886837,-0.3024142,-0.0376315,0.3485964,-0.0667716,-
 0.1245616,0.1112149,-0.1049537,-0.0502265,0.0842469,0.1173746,0.111211
 8,-0.0142491,-1.2371627,0.5875555,0.1955591,0.2570627,-0.7342272,-0.00
 57878,0.3321819,-0.1792484,-0.4703088\Polar=80.4267671,-2.7950335,74.9
 057144,-3.4371337,-1.5499714,59.453001\PG=C01 [X(C5H11N1O1)]\NImag=0\\
 0.54400195,-0.10560296,0.62460764,-0.16572297,-0.11884424,0.23670362,-
 0.11937616,-0.01774954,0.03390003,0.55416922,-0.02139360,-0.14592710,0
 .04085490,-0.10313669,0.50897225,0.03484822,0.03476116,-0.09241214,-0.
 01504183,0.00651169,0.52751061,0.01364504,-0.01539804,0.01084676,-0.17
 533686,0.10276842,-0.08346820,0.18908259,0.01487798,-0.02436178,0.0138
 9200,0.09545625,-0.12379120,0.06484101,-0.10152009,0.14368287,-0.00844
 222,0.01769449,-0.00963423,-0.07956175,0.06347494,-0.10484440,0.090686
 61,-0.07520190,0.11299468,-0.01533627,0.00117863,0.01308183,-0.1421148
 4,0.06646912,0.10774805,-0.01209222,0.00853881,0.01372063,0.15846986,-
 0.02061368,0.00839252,0.02125227,0.07275813,-0.09922618,-0.08231792,0.
 00941173,-0.00671250,-0.01160818,-0.06616552,0.10927178,0.01450045,-0.
 00011483,-0.01258494,0.10439019,-0.07453538,-0.17093298,-0.00983759,0.
 00613528,0.01322350,-0.11887459,0.08334397,0.18625227,-0.01261850,-0.0
 1970559,-0.00357159,-0.10723769,-0.02294673,-0.03694972,-0.01276726,-0
 .01465024,-0.01732208,0.01219333,0.00988816,0.01090496,0.53502065,-0.0
 2188901,-0.02922922,-0.00741948,-0.02220206,-0.10254786,-0.03722275,0.
 00901012,0.01159019,0.01018049,-0.00897507,-0.00829151,-0.01150637,-0.
 03840983,0.53518640,0.01121755,0.01478163,0.01475618,-0.03811124,-0.04
 101156,-0.12964635,-0.00816221,-0.01011230,-0.01055545,-0.01487949,-0.
 01336088,-0.01524994,-0.03504489,-0.04113349,0.53337592,-0.00183597,-0
 .00459450,-0.00228660,-0.00753224,-0.01106843,0.01086375,-0.00003403,0
 .00067533,0.00033693,0.00065158,0.00016843,0.00003090,-0.09649416,-0.0
 8306269,0.05830998,0.10190050,-0.00287023,-0.00371600,-0.00269313,-0.0
 0573050,-0.01230955,0.01137832,-0.00019417,0.00077449,-0.00002291,0.00
 065079,-0.00003485,0.00004206,-0.08345707,-0.18776791,0.09916975,0.093
 91399,0.20319151,-0.00276627,-0.00405813,-0.00136545,-0.00844001,-0.01
 467245,0.01170768,0.00034240,0.00078861,0.00090133,0.00080169,0.000383
 76,0.00077152,0.05955973,0.10075356,-0.11891426,-0.06408389,-0.1088276
 8,0.12618358,0.00137923,0.00094199,0.00110933,-0.01390836,0.00905842,-
 0.00944854,-0.00067865,-0.00246133,-0.00206877,0.00080700,-0.00005645,
 0.00056454,-0.18263417,0.10495593,-0.08079654,0.01205758,-0.00814009,0
 .00664863,0.19651703,0.00115846,0.00186739,0.00033594,-0.01617299,0.01
 095454,-0.01018242,-0.00286544,-0.00182336,-0.00302640,0.00043191,0.00
 090169,0.00080456,0.10661341,-0.12996017,0.06581450,0.01706734,-0.0126
 5334,0.00894312,-0.11354880,0.13814178,0.00176084,-0.00029953,0.001145
 73,-0.01597761,0.01236267,-0.01149785,-0.00220362,-0.00313763,-0.00171
 627,0.00025196,0.00067567,0.00044541,-0.08060328,0.06301598,-0.0971627
 7,-0.01196083,0.00837760,-0.00758334,0.09189733,-0.06821715,0.10449692
 ,0.00116434,0.00161124,0.00041667,0.01204447,-0.00887732,-0.01523841,0
 .00103915,0.00057970,0.00080131,-0.00177096,-0.00268349,-0.00266767,-0
 .13516181,0.06215056,0.10617609,-0.00871948,0.00619593,0.00890277,-0.0
 1293474,0.00761770,0.01679695,0.14476008,0.00135639,0.00185560,0.00075
 468,0.01081530,-0.00912120,-0.01408217,-0.00029030,0.00067708,0.000757
 76,-0.00274881,-0.00116349,-0.00239956,0.06209951,-0.09140927,-0.07422
 734,-0.01382816,0.01141329,0.01711124,0.00960082,-0.00736018,-0.013364
 34,-0.06624050,0.09621473,0.00007332,0.00130693,0.00137419,0.01279711,
 -0.00844269,-0.01647918,0.00008260,0.00048856,0.00032088,-0.00337777,-
 0.00185158,-0.00137098,0.10486554,-0.07507866,-0.17639321,0.00906054,-
 0.00700381,-0.01179444,-0.00800796,0.00549395,0.01152986,-0.11531951,0
 .08539569,0.19215910,-0.16989195,0.01695334,0.05286507,-0.01286220,-0.
 00507869,0.00918010,0.00042156,0.00210370,-0.00140993,0.00070533,0.000
 44166,-0.00142303,0.00052158,0.00096622,-0.00156835,0.00075493,0.00078
 240,0.00008628,-0.00042487,-0.00018684,0.00018471,-0.00021221,-0.00009
 578,0.00039769,0.43774888,0.01962347,-0.10982877,0.00688678,-0.0210717
 0,0.01055032,0.00729309,0.00031696,0.00010828,0.00062452,-0.00262146,-
 0.00358071,0.00218581,-0.00112245,-0.00059157,0.00261722,-0.00028259,-
 0.00057033,-0.00066705,0.00016248,-0.00002993,-0.00022218,-0.00007318,
 -0.00058927,-0.00067889,0.01426041,0.62386287,0.05035664,0.00975162,-0
 .08509877,0.01446377,-0.00145802,-0.01231057,0.00076829,-0.00102679,0.
 00062557,0.00226233,0.00261036,-0.00183724,-0.00147116,-0.00107947,0.0
 0138816,-0.00024678,-0.00063217,-0.00030564,0.00018318,0.00004498,-0.0
 0017698,-0.00025022,-0.00044578,-0.00014830,-0.01576695,-0.02008937,0.
 52739161,-0.01016405,0.03584372,0.01601065,0.00161585,0.00116083,-0.00
 060960,-0.00012233,-0.00024523,0.00020476,0.00009147,0.00006165,-0.000
 11138,-0.00039585,0.00027101,0.00004747,0.00024528,-0.00014084,-0.0002
 2326,0.00009815,0.00002918,0.00001695,-0.00052118,-0.00068648,-0.00023
 028,-0.04745330,-0.01440653,-0.00512502,0.06264519,0.00574882,-0.00400
 992,-0.00177600,-0.00037468,-0.00051006,0.00152934,-0.00028604,0.00036
 809,-0.00007648,0.00012350,0.00001320,-0.00005789,0.00016656,0.0003490
 4,-0.00062244,0.00017657,0.00020750,0.00016196,-0.00003079,-0.00001353
 ,0.00006909,-0.00041360,0.00011046,0.00019561,-0.00848945,-0.24688298,
 -0.10379060,0.00538181,0.26593707,0.00897660,-0.01469414,-0.00525440,-
 0.00051938,-0.00114617,0.00078813,0.00004715,0.00014833,-0.00059757,-0
 .00016648,0.00011129,-0.00005042,0.00028482,0.00021835,-0.00013335,0.0
 0001831,0.00009648,0.00001914,-0.00020452,0.00000249,0.00004687,0.0001
 0982,0.00006244,0.00028943,-0.00545397,-0.10140752,-0.10516078,0.00363
 073,0.11619654,0.11284303,-0.01413459,-0.02423266,0.02344919,-0.003112
 03,0.00457833,0.00289576,0.00017476,-0.00000508,-0.00006608,-0.0010244
 1,-0.00129056,0.00081093,0.00019115,0.00010901,0.00015330,-0.00002180,
 -0.00003953,-0.00008021,-0.00005017,0.00000717,-0.00000425,0.00007292,
 -0.00005594,-0.00013351,-0.05391069,-0.02425485,0.02629713,0.00012269,
 -0.00071350,-0.00026553,0.07017204,-0.00123308,0.00491627,-0.00438683,
 0.00054598,0.00019473,0.00019289,0.00007410,0.00005514,-0.00027963,0.0
 0006636,-0.00015188,-0.00020626,0.00009894,0.00015361,0.00010990,-0.00
 002553,-0.00003468,0.00000008,-0.00010457,0.00003015,0.00003512,0.0001
 9393,0.00005412,0.00010529,-0.03125965,-0.18190368,0.12623421,-0.00463
 835,-0.01954042,0.01921808,0.03117359,0.19238679,0.00866233,0.00921706
 ,-0.00993216,0.00076554,-0.00244574,-0.00064793,-0.00019340,-0.0001284
 2,0.00005350,0.00031496,0.00066061,-0.00025057,0.00003648,-0.00001253,
 -0.00004873,-0.00001529,0.00001319,0.00006234,-0.00001526,0.00003319,0
 .00006107,0.00008656,0.00008049,0.00012515,0.03015053,0.12165169,-0.16
 832595,-0.00321944,-0.01009788,0.01195211,-0.03316442,-0.13746138,0.18
 357800,-0.04010018,0.00719187,-0.01308604,0.00019410,0.00096327,-0.001
 88469,-0.00026653,-0.00016754,0.00030052,0.00025303,0.00012387,-0.0001
 3586,-0.00028528,0.00005285,0.00027000,-0.00002408,-0.00022068,-0.0000
 8971,0.00004556,-0.00001488,-0.00000836,0.00000443,-0.00016990,-0.0001
 4179,-0.11990709,-0.00362950,-0.05108714,-0.00140813,-0.00067852,-0.00
 396679,0.00349956,0.00067254,0.00100435,0.50568327,0.00859182,0.001023
 91,0.00313546,-0.00046544,0.00024263,0.00000448,-0.00058013,-0.0002884
 1,0.00001771,0.00001057,0.00011246,-0.00007660,0.00033848,-0.00051918,
 -0.00030712,-0.00005283,0.00011569,0.00009336,0.00002265,0.00008084,0.
 00016458,-0.00005098,0.00025529,0.00020283,-0.00553655,-0.08315657,-0.
 00224318,-0.02222859,0.00110971,-0.02169383,0.01804630,0.00171962,0.01
 711744,-0.00293949,0.57182576,0.01274972,-0.00252665,0.01596621,0.0003
 3847,-0.00223823,0.00146126,-0.00015616,0.00033185,0.00001624,0.000255
 92,-0.00006871,0.00009037,-0.00003016,0.00035022,-0.00040089,0.0000618
 1,0.00014309,0.00009306,-0.00011800,-0.00005939,-0.00013204,-0.0000727
 1,0.00003648,0.00006561,-0.05445390,0.00044552,-0.13956962,-0.01248672
 ,0.00053646,-0.01180546,-0.01840009,-0.00147297,-0.01688291,-0.0550708
 6,0.00171267,0.52828127,0.00220440,-0.00035478,0.00127945,-0.00075544,
 0.00019919,-0.00064143,-0.00092886,-0.00059895,0.00004976,0.00013576,-
 0.00010878,0.00017273,0.00003090,-0.00022540,0.00001563,-0.00001813,0.
 00001203,-0.00000301,0.00005265,0.00005513,0.00006227,-0.00001852,0.00
 005311,0.00003446,0.00389163,0.01907627,-0.01893163,0.00081625,-0.0002
 0692,0.00116684,-0.00357020,-0.00019240,-0.00379803,-0.05310424,-0.027
 72927,0.02773617,0.05615868,-0.00001714,-0.00021344,-0.00000522,0.0000
 4545,-0.00041162,0.00004750,-0.00044191,0.00046151,-0.00011862,0.00016
 705,-0.00000251,0.00001874,-0.00009046,0.00027635,-0.00011128,0.000030
 01,0.00001337,0.00001028,-0.00005685,-0.00006769,-0.00008178,-0.000020
 83,-0.00004935,-0.00005761,0.00104318,0.00118370,-0.00125206,0.0006275
 7,0.00066751,0.00010750,-0.00043468,0.00139027,-0.00039569,-0.02753047
 ,-0.17693820,0.12788361,0.03121611,0.18840267,0.00070442,-0.00063289,0
 .00122761,-0.00016380,0.00089406,-0.00025705,0.00002425,-0.00041158,0.
 00046845,0.00000592,-0.00016676,0.00016620,0.00008130,-0.00029965,0.00
 009750,-0.00004960,-0.00001684,0.00000093,0.00010329,0.00005459,0.0000
 6582,-0.00002062,0.00005561,-0.00004000,0.00434370,0.01609758,-0.01712
 830,0.00042770,-0.00023988,0.00048068,-0.00373745,-0.00085263,-0.00191
 628,0.02645645,0.12753536,-0.17522553,-0.02735637,-0.14141250,0.190586
 54,-0.00528178,0.00173493,-0.00419767,0.00051253,0.00100360,-0.0006067
 0,0.00022782,-0.00005883,0.00005828,-0.00006935,0.00003718,-0.00003332
 ,-0.00008852,-0.00010383,0.00014961,-0.00004235,-0.00009613,-0.0000290
 6,0.00002889,0.00002293,0.00001105,0.00002489,-0.00001775,-0.00004509,
 -0.01787188,0.00428199,0.01387957,0.00057373,-0.00079238,0.00012283,0.
 00062199,0.00060511,-0.00001868,-0.24516297,0.04229570,0.10192345,-0.0
 0350233,0.00022185,0.00181717,0.26759296,0.00038931,0.00080191,0.00047
 571,0.00005338,-0.00019629,0.00027230,0.00011103,0.00026292,-0.0000962
 7,-0.00000540,-0.00000192,-0.00001783,-0.00000312,0.00021688,-0.000084
 85,0.00003265,0.00002706,0.00001445,-0.00003442,-0.00004982,-0.0000457
 1,-0.00000364,-0.00002465,-0.00002561,-0.00067897,-0.00150309,0.000137
 73,0.00003007,0.00007159,0.00022093,0.00010103,-0.00006404,-0.00003231
 ,0.04273983,-0.05651498,-0.02297977,-0.02106177,0.00472823,0.00979828,
 -0.04739621,0.05610648,-0.00474719,0.00124426,-0.00238433,-0.00026523,
 0.00056447,-0.00044906,0.00002197,-0.00032024,0.00005309,-0.00005664,-
 0.00003860,0.00002645,-0.00000795,-0.00017089,0.00013220,-0.00002356,-
 0.00004365,-0.00003618,0.00004225,0.00004797,0.00005384,0.00001081,0.0
 0000610,0.00000893,-0.01890344,0.00433352,0.01174651,0.00080830,-0.000
 37361,0.00092425,0.00076633,0.00036987,0.00084677,0.10401838,-0.023189
 20,-0.10216314,0.01936312,-0.00539168,-0.01018175,-0.11192388,0.024836
 25,0.10799946,0.00301201,-0.00046660,0.00110319,-0.00024083,-0.0003609
 8,0.00019425,0.00000452,0.00004885,-0.00013679,-0.00006321,0.00000307,
 -0.00002155,0.00004307,-0.00001850,-0.00011317,-0.00000836,0.00005173,
 0.00004297,-0.00003258,-0.00000037,-0.00000193,-0.00000482,0.00009524,
 0.00008859,-0.00325195,-0.02365050,-0.01281141,-0.00333746,0.00016017,
 -0.00375498,0.00089509,0.00040951,0.00099919,-0.04822821,-0.01139958,-
 0.00467581,-0.00115864,-0.00476928,-0.00236425,0.00285678,0.02608384,0
 .01175447,0.04982648,-0.00042232,0.00119834,0.00085805,-0.00005032,-0.
 00024029,0.00016418,0.00003656,0.00005033,-0.00019616,-0.00013071,0.00
 001756,-0.00005854,-0.00000299,0.00006456,-0.00006400,0.00001824,-0.00
 000205,-0.00000174,-0.00003324,-0.00000558,-0.00000581,0.00000888,0.00
 000069,0.00003858,0.00074437,0.00077739,0.00024020,0.00057169,0.001566
 77,0.00033043,-0.00041238,0.00083037,-0.00030309,-0.01273064,-0.259762
 98,-0.10409883,-0.00048501,-0.01947738,-0.01016950,0.00001672,-0.00423
 081,-0.00130072,0.01336842,0.27921538,0.00139125,0.00142937,0.00144227
 ,-0.00005861,0.00026929,-0.00022521,0.00007071,-0.00003096,0.00002580,
 0.00002374,-0.00001691,0.00005562,0.00011893,-0.00010108,-0.00013626,-
 0.00001835,0.00004187,0.00004609,-0.00000571,0.00000128,0.00003275,-0.
 00001377,0.00009018,0.00005441,-0.00100568,-0.02217898,-0.01248548,-0.
 00391084,0.00060728,-0.00237932,0.00074805,-0.00004584,0.00055798,-0.0
 0628676,-0.10286934,-0.09848172,0.00077238,0.02078573,0.01149480,-0.00
 136825,-0.01231356,-0.00678370,0.00993272,0.11447290,0.10646892,-0.134
 77737,0.05206556,0.02675606,0.02000061,-0.00918726,-0.01029970,-0.0042
 3171,-0.00313572,0.00449321,-0.00131362,-0.00390844,0.00487861,-0.0007
 0663,-0.00530156,0.00591027,-0.00220301,-0.00175077,-0.00141594,-0.001
 05293,-0.00082727,-0.00158838,0.00008686,0.00106626,-0.00002893,-0.027
 41175,0.02737387,0.00116891,-0.00002762,-0.00031152,-0.00142537,-0.000
 06697,0.00402391,-0.00147618,-0.00046900,0.00155989,0.00058644,-0.0003
 0912,-0.00017204,0.00017908,0.00060706,-0.00052225,-0.00041631,-0.0004
 1997,-0.00028099,-0.00025621,0.82618749,0.07236479,-0.28056098,0.04583
 843,-0.00088355,-0.03906549,0.01745194,-0.00026276,0.00058845,-0.00179
 188,0.00211539,0.00182641,-0.00242103,0.00187071,0.00202959,-0.0017044
 1,0.00108088,0.00164438,0.00012151,-0.00031868,-0.00000099,0.00061535,
 -0.00020836,-0.00076047,-0.00000311,0.02005837,-0.00281053,-0.01614689
 ,-0.00350560,0.00031217,0.00367094,-0.00439655,-0.00103271,0.00438060,
 -0.00654159,0.00150920,0.00438784,0.00082909,-0.00014388,-0.00000541,-
 0.00291113,0.00028854,-0.00129545,0.00034560,-0.00020858,-0.00053212,-
 0.09928931,0.60301773,0.01879843,0.05829375,-0.07619616,-0.00957329,0.
 01939408,-0.00045791,0.00268113,0.00387900,-0.00313689,0.00007912,0.00
 226198,-0.00054618,-0.00020681,-0.00054315,-0.00139044,0.00016785,0.00
 026682,0.00020512,0.00002259,0.00015624,0.00080425,0.00020793,-0.00021
 991,-0.00000571,0.00237914,-0.01918393,-0.00509909,0.00601328,-0.00205
 956,-0.00255979,0.00151800,-0.00137310,0.00019898,-0.00136587,0.000954
 34,0.00021114,0.00004003,0.00022098,-0.00012023,-0.00035611,-0.0000615
 5,-0.00018971,-0.00004073,-0.00005388,0.00063366,-0.28171191,-0.098612
 98,0.35843617,0.00884006,0.00816251,-0.00234449,0.00039410,0.00279023,
 0.00229352,-0.00001181,0.00009973,0.00005232,-0.00012260,-0.00011835,-
 0.00011999,0.00028815,0.00065756,-0.00063579,0.00013379,0.00009412,0.0
 0013778,-0.00001861,0.00001466,0.00006381,0.00000570,-0.00007695,-0.00
 007417,-0.00065079,0.00212332,-0.00120867,0.00026645,-0.00018298,-0.00
 005511,0.00019420,0.00057519,-0.00026374,0.00030964,0.00007501,-0.0001
 5555,-0.00006089,-0.00000159,-0.00007954,0.00011393,0.00002818,0.00004
 789,0.00004525,-0.00000363,0.00003066,-0.10997968,-0.08052742,0.054283
 30,0.13372219,-0.01411104,-0.02944394,0.01992334,0.00568110,-0.0011332
 4,0.00101663,-0.00102471,-0.00128287,0.00093531,0.00000855,0.00015389,
 -0.00004926,0.00005456,0.00009603,0.00000900,-0.00006235,-0.00000946,-
 0.00011805,-0.00005292,-0.00001153,-0.00013391,-0.00000565,-0.00007920
 ,-0.00011889,-0.00311523,-0.00106086,0.00218015,0.00021637,0.00028450,
 -0.00030528,0.00097626,0.00048067,-0.00123553,0.00060648,-0.00001706,-
 0.00034403,-0.00021347,0.00010831,-0.00019953,0.00014231,0.00003481,0.
 00008031,0.00008974,0.00003138,0.00014640,-0.06963368,-0.15853138,0.06
 992892,0.07988732,0.17198041,0.00718650,0.00998450,0.00274021,0.001100
 03,0.00020685,0.00580865,-0.00057643,-0.00015347,0.00047762,0.00033542
 ,-0.00070409,0.00022871,0.00067642,0.00106705,-0.00115589,0.00022218,0
 .00034499,0.00027432,-0.00012577,-0.00011771,-0.00019291,-0.00012913,0
 .00004004,0.00001370,-0.00023914,-0.00175709,-0.00045081,-0.00026102,-
 0.00035997,0.00047599,-0.00052008,0.00003522,0.00035477,-0.00022842,0.
 00026807,-0.00005223,0.00006169,-0.00007565,0.00005951,-0.00007724,-0.
 00002855,-0.00006261,-0.00010000,0.00003234,-0.00013530,0.04942729,0.0
 7565813,-0.10929915,-0.08184330,-0.09133489,0.09764457,-0.05073019,0.0
 6242090,0.01039113,-0.00645422,-0.00694171,0.00616517,0.00187480,0.000
 46266,-0.00169671,0.00060013,0.00205141,-0.00302831,0.00010103,0.00201
 470,-0.00293821,0.00118995,0.00093901,0.00060910,0.00074899,0.00059870
 ,0.00130239,0.00014088,-0.00087606,-0.00004085,0.00980478,0.00389399,-
 0.00248082,-0.00304514,0.00072297,0.00145505,-0.00005355,-0.00098557,0
 .00014449,-0.00103386,0.00004244,0.00196798,0.00013610,0.00018403,-0.0
 0037166,-0.00114140,0.00013646,-0.00048931,0.00006281,-0.00021263,-0.0
 0016427,-0.56391265,0.10018011,0.20706390,-0.03346909,0.00055636,0.025
 09100,0.64518063,0.06404202,-0.01737242,-0.01908266,0.00248187,0.00356
 561,-0.00165927,0.00113468,-0.00035924,-0.00126678,0.00088631,-0.00152
 396,-0.00108689,-0.00074186,0.00035404,0.00023766,-0.00018637,-0.00028
 912,-0.00003684,0.00009586,-0.00000027,0.00019197,0.00021963,-0.000024
 17,0.00003341,-0.00291249,-0.00397426,0.00696508,0.00165773,-0.0000407
 2,-0.00113689,0.00084402,0.00051566,-0.00104169,0.00227252,-0.00079773
 ,-0.00203915,-0.00026416,0.00007213,-0.00002833,0.00101394,0.00004720,
 0.00064130,0.00000965,0.00017491,0.00024447,0.10823132,-0.12810144,-0.
 03324806,-0.01359691,0.01839954,0.00689422,-0.16518776,0.12935425,0.01
 045237,-0.01729435,0.01950654,-0.00004237,0.00141730,-0.00711570,-0.00
 097428,0.00001864,0.00132415,-0.00152661,-0.00116631,0.00156323,-0.001
 32052,-0.00101814,0.00143757,-0.00038733,-0.00063400,-0.00026582,0.000
 21992,-0.00012974,-0.00022037,0.00020315,0.00034841,0.00029055,0.00063
 718,0.00404927,0.00694568,-0.00098227,0.00015804,0.00012144,-0.0002670
 8,-0.00022203,0.00021386,0.00130258,-0.00082702,-0.00147164,-0.0000240
 8,-0.00017226,0.00022109,0.00069405,-0.00006965,0.00045897,-0.00009477
 ,0.00011557,-0.00018531,0.20521906,-0.02961147,-0.16148806,0.02987108,
 -0.00038069,0.00327086,-0.24298008,0.04541843,0.13539296\\0.00000059,0
 .00000036,0.00000226,-0.00000036,-0.00000139,-0.00000171,-0.00000083,-
 0.00000442,-0.00000457,0.00000072,-0.00000348,0.00000055,-0.00000206,0
 .00000345,-0.00000461,-0.00000281,0.00000184,-0.00000746,-0.00000160,0
 .00000637,-0.00000177,-0.00000319,0.00000566,-0.00000680,0.,0.00000098
 ,0.00000023,-0.00000165,0.00000309,-0.00000345,0.00000049,0.00000368,0
 .00000323,0.00000064,-0.00000462,-0.00000037,0.00000013,-0.00000742,-0
 .00000328,0.00000002,-0.00000392,-0.00000179,0.00000221,-0.00000661,0.
 00000343,0.00000213,0.00000182,0.00000725,0.00000274,0.00000313,0.0000
 0974,0.00000282,0.00000148,0.00000912\\\@


 THE RED LIGHT IS ALWAYS LONGER THAN THE GREEN LIGHT.

                     -- PETER'S THEORY OF RELATIVITY
 Job cpu time:       0 days  0 hours 55 minutes  2.0 seconds.
 File lengths (MBytes):  RWF=     75 Int=      0 D2E=      0 Chk=      4 Scr=      1
 Normal termination of Gaussian 09 at Sat Sep 20 23:23:02 2014.
 Link1:  Proceeding to internal job step number  2.
 ----------------------------------------------------------------
 #N Geom=AllCheck Guess=TCheck SCRF=Check GenChk RB3LYP/TZVP Freq
 ----------------------------------------------------------------
 1/7=10,10=4,29=7,30=1,38=1,40=1/1,3;
 2/12=2,40=1/2;
 3/5=19,7=101,11=2,14=-4,16=1,25=1,30=1,70=2,71=2,74=-5,116=1,140=1/1,2,3;
 4/5=101/1;
 5/5=2,98=1/2;
 8/6=4,10=90,11=11/1;
 11/6=1,8=1,9=11,15=111,16=1/1,2,10;
 10/6=1/2;
 6/7=2,8=2,9=2,10=2,18=1,28=1/1;
 7/8=1,10=1,25=1/1,2,3,16;
 1/7=10,10=4,30=1/3;
 99//99;
 Structure from the checkpoint file:  "DEF_opt_startvalue_M2.chk"
 -------------------
 Title Card Required
 -------------------
 Charge =  0 Multiplicity = 1
 Redundant internal coordinates found in file.
 N,0,0.0637773258,0.1815795044,-0.0686226418
 C,0,-0.6348309066,-0.9020150448,0.6253267138
 H,0,0.1089143571,-1.5047732735,1.1505383784
 H,0,-1.2801603268,-0.4431904005,1.3736342704
 C,0,-1.4668290797,-1.7746366719,-0.3145285414
 H,0,-1.9472186058,-2.5802014679,0.2454974785
 H,0,-2.2460867918,-1.1817995395,-0.7944536592
 H,0,-0.8493899326,-2.2297310156,-1.092252318
 C,0,1.384908495,-0.0657579762,-0.6383203361
 H,0,1.3635568285,-1.0227749626,-1.1674101761
 H,0,1.56934137,0.7010947597,-1.3937749746
 C,0,2.5150383048,-0.057178268,0.3912805057
 H,0,2.3650182925,-0.8163674948,1.1610553517
 H,0,3.4709706436,-0.2625535833,-0.096069927
 H,0,2.583014569,0.9146190705,0.8835214699
 C,0,-0.5430188386,1.3901283301,-0.2002583976
 H,0,0.0776112046,2.1125933327,-0.7611299537
 O,0,-1.6414149091,1.6821977012,0.2358907572
 Recover connectivity data from disk.

 GradGradGradGradGradGradGradGradGradGradGradGradGradGradGradGradGradGrad
 Berny optimization.
 Initialization pass.
                           ----------------------------
                           !    Initial Parameters    !
                           ! (Angstroms and Degrees)  !
 --------------------------                            --------------------------
 ! Name  Definition              Value          Derivative Info.                !
 --------------------------------------------------------------------------------
 ! R1    R(1,2)                  1.4642         calculate D2E/DX2 analytically  !
 ! R2    R(1,9)                  1.4598         calculate D2E/DX2 analytically  !
 ! R3    R(1,16)                 1.3587         calculate D2E/DX2 analytically  !
 ! R4    R(2,3)                  1.0919         calculate D2E/DX2 analytically  !
 ! R5    R(2,4)                  1.0895         calculate D2E/DX2 analytically  !
 ! R6    R(2,5)                  1.5287         calculate D2E/DX2 analytically  !
 ! R7    R(5,6)                  1.0924         calculate D2E/DX2 analytically  !
 ! R8    R(5,7)                  1.0904         calculate D2E/DX2 analytically  !
 ! R9    R(5,8)                  1.0923         calculate D2E/DX2 analytically  !
 ! R10   R(9,10)                 1.0937         calculate D2E/DX2 analytically  !
 ! R11   R(9,11)                 1.0921         calculate D2E/DX2 analytically  !
 ! R12   R(9,12)                 1.5288         calculate D2E/DX2 analytically  !
 ! R13   R(12,13)                1.0915         calculate D2E/DX2 analytically  !
 ! R14   R(12,14)                1.0925         calculate D2E/DX2 analytically  !
 ! R15   R(12,15)                1.0915         calculate D2E/DX2 analytically  !
 ! R16   R(16,17)                1.1053         calculate D2E/DX2 analytically  !
 ! R17   R(16,18)                1.2174         calculate D2E/DX2 analytically  !
 ! A1    A(2,1,9)              119.4308         calculate D2E/DX2 analytically  !
 ! A2    A(2,1,16)             119.4135         calculate D2E/DX2 analytically  !
 ! A3    A(9,1,16)             121.135          calculate D2E/DX2 analytically  !
 ! A4    A(1,2,3)              108.15           calculate D2E/DX2 analytically  !
 ! A5    A(1,2,4)              107.2465         calculate D2E/DX2 analytically  !
 ! A6    A(1,2,5)              113.0004         calculate D2E/DX2 analytically  !
 ! A7    A(3,2,4)              107.7918         calculate D2E/DX2 analytically  !
 ! A8    A(3,2,5)              110.5676         calculate D2E/DX2 analytically  !
 ! A9    A(4,2,5)              109.8951         calculate D2E/DX2 analytically  !
 ! A10   A(2,5,6)              110.1872         calculate D2E/DX2 analytically  !
 ! A11   A(2,5,7)              110.4374         calculate D2E/DX2 analytically  !
 ! A12   A(2,5,8)              111.5867         calculate D2E/DX2 analytically  !
 ! A13   A(6,5,7)              108.1972         calculate D2E/DX2 analytically  !
 ! A14   A(6,5,8)              107.839          calculate D2E/DX2 analytically  !
 ! A15   A(7,5,8)              108.4872         calculate D2E/DX2 analytically  !
 ! A16   A(1,9,10)             108.6243         calculate D2E/DX2 analytically  !
 ! A17   A(1,9,11)             107.6861         calculate D2E/DX2 analytically  !
 ! A18   A(1,9,12)             113.9042         calculate D2E/DX2 analytically  !
 ! A19   A(10,9,11)            106.443          calculate D2E/DX2 analytically  !
 ! A20   A(10,9,12)            110.1891         calculate D2E/DX2 analytically  !
 ! A21   A(11,9,12)            109.6982         calculate D2E/DX2 analytically  !
 ! A22   A(9,12,13)            111.681          calculate D2E/DX2 analytically  !
 ! A23   A(9,12,14)            110.2025         calculate D2E/DX2 analytically  !
 ! A24   A(9,12,15)            110.7783         calculate D2E/DX2 analytically  !
 ! A25   A(13,12,14)           107.7047         calculate D2E/DX2 analytically  !
 ! A26   A(13,12,15)           108.0459         calculate D2E/DX2 analytically  !
 ! A27   A(14,12,15)           108.3046         calculate D2E/DX2 analytically  !
 ! A28   A(1,16,17)            112.3205         calculate D2E/DX2 analytically  !
 ! A29   A(1,16,18)            125.5657         calculate D2E/DX2 analytically  !
 ! A30   A(17,16,18)           122.1137         calculate D2E/DX2 analytically  !
 ! D1    D(9,1,2,3)             35.3183         calculate D2E/DX2 analytically  !
 ! D2    D(9,1,2,4)            151.3243         calculate D2E/DX2 analytically  !
 ! D3    D(9,1,2,5)            -87.4191         calculate D2E/DX2 analytically  !
 ! D4    D(16,1,2,3)          -146.3184         calculate D2E/DX2 analytically  !
 ! D5    D(16,1,2,4)           -30.3123         calculate D2E/DX2 analytically  !
 ! D6    D(16,1,2,5)            90.9442         calculate D2E/DX2 analytically  !
 ! D7    D(2,1,9,10)            44.9093         calculate D2E/DX2 analytically  !
 ! D8    D(2,1,9,11)           159.8062         calculate D2E/DX2 analytically  !
 ! D9    D(2,1,9,12)           -78.3022         calculate D2E/DX2 analytically  !
 ! D10   D(16,1,9,10)         -133.425          calculate D2E/DX2 analytically  !
 ! D11   D(16,1,9,11)          -18.5282         calculate D2E/DX2 analytically  !
 ! D12   D(16,1,9,12)          103.3634         calculate D2E/DX2 analytically  !
 ! D13   D(2,1,16,17)         -178.7164         calculate D2E/DX2 analytically  !
 ! D14   D(2,1,16,18)            1.3472         calculate D2E/DX2 analytically  !
 ! D15   D(9,1,16,17)           -0.3818         calculate D2E/DX2 analytically  !
 ! D16   D(9,1,16,18)          179.6818         calculate D2E/DX2 analytically  !
 ! D17   D(1,2,5,6)            178.6329         calculate D2E/DX2 analytically  !
 ! D18   D(1,2,5,7)            -61.8891         calculate D2E/DX2 analytically  !
 ! D19   D(1,2,5,8)             58.8651         calculate D2E/DX2 analytically  !
 ! D20   D(3,2,5,6)             57.2518         calculate D2E/DX2 analytically  !
 ! D21   D(3,2,5,7)            176.7298         calculate D2E/DX2 analytically  !
 ! D22   D(3,2,5,8)            -62.516          calculate D2E/DX2 analytically  !
 ! D23   D(4,2,5,6)            -61.6214         calculate D2E/DX2 analytically  !
 ! D24   D(4,2,5,7)             57.8566         calculate D2E/DX2 analytically  !
 ! D25   D(4,2,5,8)            178.6108         calculate D2E/DX2 analytically  !
 ! D26   D(1,9,12,13)           59.4785         calculate D2E/DX2 analytically  !
 ! D27   D(1,9,12,14)          179.1489         calculate D2E/DX2 analytically  !
 ! D28   D(1,9,12,15)          -61.0124         calculate D2E/DX2 analytically  !
 ! D29   D(10,9,12,13)         -62.8771         calculate D2E/DX2 analytically  !
 ! D30   D(10,9,12,14)          56.7933         calculate D2E/DX2 analytically  !
 ! D31   D(10,9,12,15)         176.632          calculate D2E/DX2 analytically  !
 ! D32   D(11,9,12,13)        -179.7482         calculate D2E/DX2 analytically  !
 ! D33   D(11,9,12,14)         -60.0777         calculate D2E/DX2 analytically  !
 ! D34   D(11,9,12,15)          59.761          calculate D2E/DX2 analytically  !
 --------------------------------------------------------------------------------
 Trust Radius=3.00D-01 FncErr=1.00D-07 GrdErr=1.00D-07
 Number of steps in this run=      2 maximum allowed number of steps=      2.
 GradGradGradGradGradGradGradGradGradGradGradGradGradGradGradGradGradGrad

                          Input orientation:                          
 ---------------------------------------------------------------------
 Center     Atomic      Atomic             Coordinates (Angstroms)
 Number     Number       Type             X           Y           Z
 ---------------------------------------------------------------------
      1          7           0        0.063777    0.181580   -0.068623
      2          6           0       -0.634831   -0.902015    0.625327
      3          1           0        0.108914   -1.504773    1.150538
      4          1           0       -1.280160   -0.443190    1.373634
      5          6           0       -1.466829   -1.774637   -0.314529
      6          1           0       -1.947219   -2.580201    0.245497
      7          1           0       -2.246087   -1.181800   -0.794454
      8          1           0       -0.849390   -2.229731   -1.092252
      9          6           0        1.384908   -0.065758   -0.638320
     10          1           0        1.363557   -1.022775   -1.167410
     11          1           0        1.569341    0.701095   -1.393775
     12          6           0        2.515038   -0.057178    0.391281
     13          1           0        2.365018   -0.816367    1.161055
     14          1           0        3.470971   -0.262554   -0.096070
     15          1           0        2.583015    0.914619    0.883521
     16          6           0       -0.543019    1.390128   -0.200258
     17          1           0        0.077611    2.112593   -0.761130
     18          8           0       -1.641415    1.682198    0.235891
 ---------------------------------------------------------------------
                    Distance matrix (angstroms):
                    1          2          3          4          5
     1  N    0.000000
     2  C    1.464171   0.000000
     3  H    2.081388   1.091935   0.000000
     4  H    2.067997   1.089465   1.762458   0.000000
     5  C    2.495998   1.528731   2.168459   2.158121   0.000000
     6  H    3.430774   2.164010   2.490648   2.506886   1.092400
     7  H    2.778688   2.165687   3.071374   2.485792   1.090425
     8  H    2.774186   2.181500   2.544410   3.075368   1.092335
     9  C    1.459835   2.524971   2.626584   3.360507   3.340287
    10  H    2.085001   2.687386   2.679428   3.712420   3.050211
    11  H    2.071871   3.391918   3.670454   4.133715   4.063539
    12  C    2.505433   3.269588   2.908855   3.939233   4.393529
    13  H    2.793513   3.048514   2.358817   3.670392   4.216477
    14  H    3.436128   4.217455   3.794808   4.976536   5.168751
    15  H    2.791143   3.704235   3.470725   4.124073   5.006861
    16  C    1.358720   2.438020   3.260387   2.526178   3.298821
    17  H    2.051480   3.393774   4.091552   3.596219   4.206579
    18  O    2.291782   2.800541   3.749269   2.437671   3.504732
                    6          7          8          9         10
     6  H    0.000000
     7  H    1.768148   0.000000
     8  H    1.765682   1.771329   0.000000
     9  C    4.266923   3.801849   3.143394   0.000000
    10  H    3.922132   3.632343   2.521810   1.093743   0.000000
    11  H    5.081369   4.296739   3.811944   1.092149   1.750804
    12  C    5.128220   5.033791   4.270859   1.528838   2.165134
    13  H    4.748131   5.021936   4.172219   2.182151   2.543085
    14  H    5.902960   5.832452   4.850534   2.164352   2.483324
    15  H    5.757070   5.525468   5.056879   2.170852   3.073580
    16  C    4.234855   3.141388   3.740708   2.455281   3.223742
    17  H    5.209180   4.031589   4.452500   2.543486   3.413100
    18  O    4.273366   3.103179   4.206478   3.602531   4.279718
                   11         12         13         14         15
    11  H    0.000000
    12  C    2.157717   0.000000
    13  H    3.076191   1.091525   0.000000
    14  H    2.495766   1.092472   1.763577   0.000000
    15  H    2.501840   1.091472   1.766596   1.770254   0.000000
    16  C    2.522165   3.434578   3.895957   4.342157   3.342570
    17  H    2.148913   3.460782   4.183998   4.195059   3.227548
    18  O    3.731934   4.508401   4.811472   5.479849   4.342166
                   16         17         18
    16  C    0.000000
    17  H    1.105312   0.000000
    18  O    1.217376   2.033308   0.000000
 Stoichiometry    C5H11NO
 Framework group  C1[X(C5H11NO)]
 Deg. of freedom    48
 Full point group                 C1      NOp   1
 Largest Abelian subgroup         C1      NOp   1
 Largest concise Abelian subgroup C1      NOp   1
                         Standard orientation:                         
 ---------------------------------------------------------------------
 Center     Atomic      Atomic             Coordinates (Angstroms)
 Number     Number       Type             X           Y           Z
 ---------------------------------------------------------------------
      1          7           0        0.064530   -0.181227    0.071471
      2          6           0       -0.645215    0.890867   -0.629010
      3          1           0        0.092242    1.497848   -1.158210
      4          1           0       -1.286044    0.420852   -1.374234
      5          6           0       -1.485789    1.760855    0.305641
      6          1           0       -1.974471    2.557990   -0.259252
      7          1           0       -2.258869    1.163151    0.789505
      8          1           0       -0.872804    2.227041    1.080313
      9          6           0        1.383226    0.083057    0.639195
     10          1           0        1.352297    1.043095    1.162306
     11          1           0        1.575623   -0.677151    1.399365
     12          6           0        2.513125    0.079514   -0.390689
     13          1           0        2.355213    0.832319   -1.165142
     14          1           0        3.467047    0.297619    0.095068
     15          1           0        2.590836   -0.894599   -0.876874
     16          6           0       -0.529937   -1.395025    0.210841
     17          1           0        0.098135   -2.107638    0.776017
     18          8           0       -1.625422   -1.700944   -0.223129
 ---------------------------------------------------------------------
 Rotational constants (GHZ):      3.0849258      2.0864115      1.4210513
 Standard basis: TZVP (5D, 7F)
 There are   206 symmetry adapted cartesian basis functions of A   symmetry.
 There are   199 symmetry adapted basis functions of A   symmetry.
   199 basis functions,   333 primitive gaussians,   206 cartesian basis functions
    28 alpha electrons       28 beta electrons
       nuclear repulsion energy       318.8169382238 Hartrees.
 NAtoms=   18 NActive=   18 NUniq=   18 SFac= 1.00D+00 NAtFMM=   60 NAOKFM=F Big=F
 Integral buffers will be    131072 words long.
 Raffenetti 2 integral format.
 Two-electron integral symmetry is turned on.
 One-electron integrals computed using PRISM.
 NBasis=   199 RedAO= T EigKep=  2.86D-04  NBF=   199
 NBsUse=   199 1.00D-06 EigRej= -1.00D+00 NBFU=   199
 Initial guess from the checkpoint file:  "DEF_opt_startvalue_M2.chk"
 B after Tr=     0.000000    0.000000    0.000000
         Rot=    1.000000    0.000000    0.000000    0.000000 Ang=   0.00 deg.
 Keep R1 ints in memory in canonical form, NReq=202598390.
 Requested convergence on RMS density matrix=1.00D-08 within 128 cycles.
 Requested convergence on MAX density matrix=1.00D-06.
 Requested convergence on             energy=1.00D-06.
 No special actions if energy rises.
 SCF Done:  E(RB3LYP) =  -327.262589459     A.U. after    1 cycles
            NFock=  1  Conv=0.16D-08     -V/T= 2.0051
 DoSCS=F DFT=T ScalE2(SS,OS)=  1.000000  1.000000
 Range of M.O.s used for correlation:     1   199
 NBasis=   199 NAE=    28 NBE=    28 NFC=     0 NFV=     0
 NROrb=    199 NOA=    28 NOB=    28 NVA=   171 NVB=   171

 **** Warning!!: The largest alpha MO coefficient is  0.17163638D+02

 Symmetrizing basis deriv contribution to polar:
 IMax=3 JMax=2 DiffMx= 0.00D+00
 G2DrvN: will do    19 centers at a time, making    1 passes.
 Calling FoFCou, ICntrl=  3107 FMM=F I1Cent=   0 AccDes= 0.00D+00.
 End of G2Drv F.D. properties file   721 does not exist.
 End of G2Drv F.D. properties file   722 does not exist.
 End of G2Drv F.D. properties file   788 does not exist.
          IDoAtm=111111111111111111
          Differentiating once with respect to electric field.
                with respect to dipole field.
          Differentiating once with respect to nuclear coordinates.
 Keep R1 ints in memory in canonical form, NReq=202455622.
          There are    57 degrees of freedom in the 1st order CPHF.  IDoFFX=6 NUNeed=     3.
     54 vectors produced by pass  0 Test12= 8.40D-15 1.75D-09 XBig12= 5.62D+01 3.21D+00.
 AX will form    54 AO Fock derivatives at one time.
     54 vectors produced by pass  1 Test12= 8.40D-15 1.75D-09 XBig12= 1.35D+01 8.97D-01.
     54 vectors produced by pass  2 Test12= 8.40D-15 1.75D-09 XBig12= 7.95D-02 3.87D-02.
     54 vectors produced by pass  3 Test12= 8.40D-15 1.75D-09 XBig12= 3.14D-04 2.35D-03.
     54 vectors produced by pass  4 Test12= 8.40D-15 1.75D-09 XBig12= 6.19D-07 1.22D-04.
     31 vectors produced by pass  5 Test12= 8.40D-15 1.75D-09 XBig12= 6.13D-10 2.18D-06.
      4 vectors produced by pass  6 Test12= 8.40D-15 1.75D-09 XBig12= 5.84D-13 1.06D-07.
      2 vectors produced by pass  7 Test12= 8.40D-15 1.75D-09 XBig12= 1.40D-15 5.59D-09.
 InvSVY:  IOpt=1 It=  1 EMax= 7.99D-15
 Solved reduced A of dimension   307 with    57 vectors.
 Isotropic polarizability for W=    0.000000       71.60 Bohr**3.
 End of Minotr F.D. properties file   721 does not exist.
 End of Minotr F.D. properties file   722 does not exist.
 End of Minotr F.D. properties file   788 does not exist.

 **********************************************************************

            Population analysis using the SCF density.

 **********************************************************************

 Orbital symmetries:
       Occupied  (A) (A) (A) (A) (A) (A) (A) (A) (A) (A) (A) (A)
                 (A) (A) (A) (A) (A) (A) (A) (A) (A) (A) (A) (A)
                 (A) (A) (A) (A)
       Virtual   (A) (A) (A) (A) (A) (A) (A) (A) (A) (A) (A) (A)
                 (A) (A) (A) (A) (A) (A) (A) (A) (A) (A) (A) (A)
                 (A) (A) (A) (A) (A) (A) (A) (A) (A) (A) (A) (A)
                 (A) (A) (A) (A) (A) (A) (A) (A) (A) (A) (A) (A)
                 (A) (A) (A) (A) (A) (A) (A) (A) (A) (A) (A) (A)
                 (A) (A) (A) (A) (A) (A) (A) (A) (A) (A) (A) (A)
                 (A) (A) (A) (A) (A) (A) (A) (A) (A) (A) (A) (A)
                 (A) (A) (A) (A) (A) (A) (A) (A) (A) (A) (A) (A)
                 (A) (A) (A) (A) (A) (A) (A) (A) (A) (A) (A) (A)
                 (A) (A) (A) (A) (A) (A) (A) (A) (A) (A) (A) (A)
                 (A) (A) (A) (A) (A) (A) (A) (A) (A) (A) (A) (A)
                 (A) (A) (A) (A) (A) (A) (A) (A) (A) (A) (A) (A)
                 (A) (A) (A) (A) (A) (A) (A) (A) (A) (A) (A) (A)
                 (A) (A) (A) (A) (A) (A) (A) (A) (A) (A) (A) (A)
                 (A) (A) (A)
 The electronic state is 1-A.
 Alpha  occ. eigenvalues --  -19.09110 -14.35118 -10.26479 -10.22427 -10.21098
 Alpha  occ. eigenvalues --  -10.17894 -10.16897  -1.03823  -0.94639  -0.78472
 Alpha  occ. eigenvalues --   -0.75551  -0.66048  -0.65425  -0.56175  -0.52673
 Alpha  occ. eigenvalues --   -0.49240  -0.45884  -0.44693  -0.44139  -0.41720
 Alpha  occ. eigenvalues --   -0.40601  -0.39273  -0.38019  -0.37754  -0.36682
 Alpha  occ. eigenvalues --   -0.35641  -0.26029  -0.25087
 Alpha virt. eigenvalues --    0.01213   0.02282   0.04892   0.05967   0.07485
 Alpha virt. eigenvalues --    0.08364   0.09058   0.10610   0.11404   0.11475
 Alpha virt. eigenvalues --    0.12517   0.12799   0.13858   0.14689   0.15524
 Alpha virt. eigenvalues --    0.18555   0.19352   0.19588   0.21046   0.23367
 Alpha virt. eigenvalues --    0.23700   0.25624   0.26665   0.29557   0.30792
 Alpha virt. eigenvalues --    0.31775   0.33656   0.34311   0.37068   0.37438
 Alpha virt. eigenvalues --    0.39671   0.41219   0.41426   0.42024   0.42354
 Alpha virt. eigenvalues --    0.42940   0.43455   0.44423   0.45559   0.47000
 Alpha virt. eigenvalues --    0.47716   0.48725   0.50932   0.51798   0.52953
 Alpha virt. eigenvalues --    0.53971   0.55941   0.56823   0.59337   0.60857
 Alpha virt. eigenvalues --    0.62885   0.63459   0.64887   0.66956   0.74401
 Alpha virt. eigenvalues --    0.79607   0.86769   1.10539   1.15733   1.22128
 Alpha virt. eigenvalues --    1.25093   1.25259   1.26417   1.27202   1.27797
 Alpha virt. eigenvalues --    1.30310   1.30405   1.31705   1.32277   1.34663
 Alpha virt. eigenvalues --    1.35853   1.36293   1.38068   1.40675   1.42618
 Alpha virt. eigenvalues --    1.43900   1.46647   1.46912   1.50179   1.51279
 Alpha virt. eigenvalues --    1.52752   1.53650   1.55730   1.57593   1.60619
 Alpha virt. eigenvalues --    1.64582   1.67010   1.69410   1.70655   1.71987
 Alpha virt. eigenvalues --    1.73960   1.75094   1.77797   1.78003   1.79180
 Alpha virt. eigenvalues --    1.79416   1.80070   1.83148   1.84103   1.86080
 Alpha virt. eigenvalues --    1.89658   1.92689   1.94663   1.95860   1.97723
 Alpha virt. eigenvalues --    2.03882   2.04812   2.12516   2.14316   2.20183
 Alpha virt. eigenvalues --    2.22844   2.25489   2.26283   2.31435   2.32711
 Alpha virt. eigenvalues --    2.34818   2.35364   2.36548   2.37859   2.39767
 Alpha virt. eigenvalues --    2.42767   2.44245   2.47474   2.50922   2.51901
 Alpha virt. eigenvalues --    2.53399   2.55404   2.57412   2.58446   2.60513
 Alpha virt. eigenvalues --    2.63185   2.63627   2.64851   2.66688   2.67370
 Alpha virt. eigenvalues --    2.69385   2.71556   2.73464   2.75913   2.78824
 Alpha virt. eigenvalues --    2.81248   2.82947   2.89755   2.91041   2.95740
 Alpha virt. eigenvalues --    3.04188   3.09186   3.12901   3.14715   3.22178
 Alpha virt. eigenvalues --    3.23455   3.29353   3.31342   3.32843   3.33441
 Alpha virt. eigenvalues --    3.34104   3.35720   3.38396   3.42726   3.47063
 Alpha virt. eigenvalues --    3.49967   3.73763   3.76892   4.27832  21.91127
 Alpha virt. eigenvalues --   21.99797  22.02883  22.11369  22.13754  31.92111
 Alpha virt. eigenvalues --   43.51617
          Condensed to atoms (all electrons):
               1          2          3          4          5          6
     1  N    7.160660   0.146964  -0.053217  -0.041723  -0.029374   0.009674
     2  C    0.146964   5.042600   0.403898   0.419626   0.276065  -0.051193
     3  H   -0.053217   0.403898   0.611287  -0.029112  -0.066857   0.000939
     4  H   -0.041723   0.419626  -0.029112   0.521625  -0.045878  -0.000390
     5  C   -0.029374   0.276065  -0.066857  -0.045878   5.061767   0.404738
     6  H    0.009674  -0.051193   0.000939  -0.000390   0.404738   0.563011
     7  H   -0.007199  -0.037887   0.008408  -0.004518   0.405137  -0.022623
     8  H   -0.003517  -0.030548  -0.006110   0.007556   0.390360  -0.028143
     9  C    0.211400  -0.034779   0.003701   0.009302  -0.015757   0.001023
    10  H   -0.052779   0.005466  -0.006357  -0.000311   0.006394  -0.000793
    11  H   -0.040892   0.010086   0.000637  -0.000241  -0.001590   0.000032
    12  C   -0.075098  -0.022292   0.004949   0.000189  -0.001641   0.000206
    13  H   -0.002412  -0.000300   0.001006  -0.000262   0.000501  -0.000033
    14  H    0.010768   0.001440  -0.000728  -0.000045   0.000120  -0.000010
    15  H    0.005755  -0.000676  -0.000569  -0.000050   0.000184  -0.000009
    16  C    0.250695  -0.029515   0.012517  -0.015282  -0.019409   0.000536
    17  H   -0.155593   0.016730   0.000381   0.001677  -0.004148   0.000044
    18  O   -0.149732   0.021185   0.002257   0.019823  -0.017375  -0.000011
               7          8          9         10         11         12
     1  N   -0.007199  -0.003517   0.211400  -0.052779  -0.040892  -0.075098
     2  C   -0.037887  -0.030548  -0.034779   0.005466   0.010086  -0.022292
     3  H    0.008408  -0.006110   0.003701  -0.006357   0.000637   0.004949
     4  H   -0.004518   0.007556   0.009302  -0.000311  -0.000241   0.000189
     5  C    0.405137   0.390360  -0.015757   0.006394  -0.001590  -0.001641
     6  H   -0.022623  -0.028143   0.001023  -0.000793   0.000032   0.000206
     7  H    0.535274  -0.029148  -0.000049  -0.000067   0.000122  -0.000063
     8  H   -0.029148   0.596687   0.000230   0.000584   0.000000   0.000420
     9  C   -0.000049   0.000230   5.022570   0.426727   0.418505   0.247669
    10  H   -0.000067   0.000584   0.426727   0.600109  -0.033398  -0.085340
    11  H    0.000122   0.000000   0.418505  -0.033398   0.569441  -0.048283
    12  C   -0.000063   0.000420   0.247669  -0.085340  -0.048283   5.135967
    13  H   -0.000021   0.000085  -0.028762  -0.004639   0.007756   0.392815
    14  H    0.000001  -0.000033  -0.042705   0.003927  -0.002238   0.385483
    15  H    0.000001  -0.000023  -0.031222   0.010077  -0.006907   0.383704
    16  C    0.006402  -0.001137  -0.034895   0.003209  -0.011753  -0.004631
    17  H    0.000652   0.000018   0.003187   0.000350   0.011180  -0.007395
    18  O    0.005734   0.000234   0.006037  -0.000137   0.000281   0.000094
              13         14         15         16         17         18
     1  N   -0.002412   0.010768   0.005755   0.250695  -0.155593  -0.149732
     2  C   -0.000300   0.001440  -0.000676  -0.029515   0.016730   0.021185
     3  H    0.001006  -0.000728  -0.000569   0.012517   0.000381   0.002257
     4  H   -0.000262  -0.000045  -0.000050  -0.015282   0.001677   0.019823
     5  C    0.000501   0.000120   0.000184  -0.019409  -0.004148  -0.017375
     6  H   -0.000033  -0.000010  -0.000009   0.000536   0.000044  -0.000011
     7  H   -0.000021   0.000001   0.000001   0.006402   0.000652   0.005734
     8  H    0.000085  -0.000033  -0.000023  -0.001137   0.000018   0.000234
     9  C   -0.028762  -0.042705  -0.031222  -0.034895   0.003187   0.006037
    10  H   -0.004639   0.003927   0.010077   0.003209   0.000350  -0.000137
    11  H    0.007756  -0.002238  -0.006907  -0.011753   0.011180   0.000281
    12  C    0.392815   0.385483   0.383704  -0.004631  -0.007395   0.000094
    13  H    0.573582  -0.025553  -0.027192  -0.001186   0.000021  -0.000020
    14  H   -0.025553   0.567442  -0.021469   0.000346   0.000152  -0.000005
    15  H   -0.027192  -0.021469   0.567803   0.001917   0.000721  -0.000389
    16  C   -0.001186   0.000346   0.001917   4.612202   0.415988   0.594324
    17  H    0.000021   0.000152   0.000721   0.415988   0.727463  -0.055608
    18  O   -0.000020  -0.000005  -0.000389   0.594324  -0.055608   7.950365
 Mulliken charges:
               1
     1  N   -0.184382
     2  C   -0.136869
     3  H    0.112970
     4  H    0.158015
     5  C   -0.343236
     6  H    0.123003
     7  H    0.139843
     8  H    0.102485
     9  C   -0.162182
    10  H    0.126977
    11  H    0.127264
    12  C   -0.306752
    13  H    0.114615
    14  H    0.123106
    15  H    0.118345
    16  C    0.219673
    17  H    0.044181
    18  O   -0.377055
 Sum of Mulliken charges =   0.00000
 Mulliken charges with hydrogens summed into heavy atoms:
               1
     1  N   -0.184382
     2  C    0.134115
     5  C    0.022094
     9  C    0.092060
    12  C    0.049314
    16  C    0.263854
    18  O   -0.377055
 APT charges:
               1
     1  N   -0.796829
     2  C    0.335248
     3  H   -0.030381
     4  H    0.005637
     5  C    0.029560
     6  H   -0.019637
     7  H    0.004836
     8  H   -0.017038
     9  C    0.400258
    10  H   -0.042682
    11  H   -0.026041
    12  C    0.019801
    13  H   -0.005932
    14  H   -0.020968
    15  H   -0.009070
    16  C    1.030886
    17  H   -0.043749
    18  O   -0.813899
 Sum of APT charges =   0.00000
 APT charges with hydrogens summed into heavy atoms:
               1
     1  N   -0.796829
     2  C    0.310505
     5  C   -0.002278
     9  C    0.331535
    12  C   -0.016169
    16  C    0.987137
    18  O   -0.813899
 Electronic spatial extent (au):  <R**2>=            916.1311
 Charge=              0.0000 electrons
 Dipole moment (field-independent basis, Debye):
    X=              3.3191    Y=              2.4523    Z=              0.7876  Tot=              4.2013
 Quadrupole moment (field-independent basis, Debye-Ang):
   XX=            -48.1962   YY=            -47.3231   ZZ=            -44.0999
   XY=             -6.1097   XZ=              0.1416   YZ=             -2.2430
 Traceless Quadrupole moment (field-independent basis, Debye-Ang):
   XX=             -1.6565   YY=             -0.7833   ZZ=              2.4398
   XY=             -6.1097   XZ=              0.1416   YZ=             -2.2430
 Octapole moment (field-independent basis, Debye-Ang**2):
  XXX=              7.9629  YYY=              2.0334  ZZZ=             -0.6574  XYY=              9.5407
  XXY=             10.1519  XXZ=              2.5261  XZZ=             -1.1549  YZZ=             -1.6207
  YYZ=              2.0335  XYZ=              2.3981
 Hexadecapole moment (field-independent basis, Debye-Ang**3):
 XXXX=           -677.2189 YYYY=           -447.5630 ZZZZ=           -135.1253 XXXY=            -11.4353
 XXXZ=              4.6772 YYYX=            -14.8140 YYYZ=             -7.5462 ZZZX=              4.0505
 ZZZY=             -0.8804 XXYY=           -202.9088 XXZZ=           -132.4276 YYZZ=            -91.9601
 XXYZ=             -3.8114 YYXZ=             -0.3194 ZZXY=              2.5815
 N-N= 3.188169382238D+02 E-N=-1.399598207595D+03  KE= 3.256088367797D+02
  Exact polarizability:  80.371   2.872  74.943   3.430  -1.613  59.471
 Approx polarizability: 107.653  11.436 102.681   8.655  -1.412  84.714
 Calling FoFJK, ICntrl=    100127 FMM=F ISym2X=0 I1Cent= 0 IOpClX= 0 NMat=1 NMatS=1 NMatT=0.
 Full mass-weighted force constant matrix:
 Low frequencies ---  -16.9196   -8.2711   -0.0004   -0.0001    0.0010    2.1438
 Low frequencies ---   48.5401   71.7235  135.7054
 Diagonal vibrational polarizability:
       13.1428201      21.3599755       6.2817295
 Harmonic frequencies (cm**-1), IR intensities (KM/Mole), Raman scattering
 activities (A**4/AMU), depolarization ratios for plane and unpolarized
 incident light, reduced masses (AMU), force constants (mDyne/A),
 and normal coordinates:
                      1                      2                      3
                      A                      A                      A
 Frequencies --     47.7873                71.7112               135.6951
 Red. masses --      2.5314                 2.7866                 2.6561
 Frc consts  --      0.0034                 0.0084                 0.0288
 IR Inten    --      0.9492                 1.4580                 0.4799
  Atom  AN      X      Y      Z        X      Y      Z        X      Y      Z
     1   7    -0.05  -0.03   0.01    -0.04   0.09   0.07    -0.03   0.02   0.21
     2   6    -0.07  -0.06  -0.01    -0.07   0.05   0.05     0.08   0.00   0.07
     3   1    -0.12  -0.21  -0.25    -0.09   0.05   0.01     0.16  -0.03   0.15
     4   1    -0.26  -0.11   0.19    -0.08   0.02   0.08     0.18  -0.02  -0.01
     5   6     0.21   0.18   0.02    -0.06   0.07   0.04    -0.05   0.07  -0.11
     6   1     0.18   0.14  -0.01    -0.09   0.04   0.03     0.08   0.06  -0.24
     7   1     0.24   0.34   0.27    -0.04   0.07   0.08    -0.16   0.13  -0.22
     8   1     0.40   0.25  -0.18    -0.05   0.10   0.01    -0.16   0.08  -0.03
     9   6    -0.07   0.01   0.02    -0.01   0.11   0.00     0.05  -0.09   0.06
    10   1    -0.11  -0.01   0.05     0.06   0.24  -0.25     0.16  -0.16   0.21
    11   1    -0.04   0.00   0.00    -0.06   0.29   0.19     0.15  -0.21  -0.09
    12   6    -0.06   0.09   0.03    -0.03  -0.24  -0.02    -0.12   0.04  -0.13
    13   1    -0.08   0.12   0.06    -0.02  -0.46  -0.23    -0.16   0.23   0.06
    14   1    -0.07   0.11   0.05     0.00  -0.16  -0.11    -0.01  -0.17  -0.25
    15   1    -0.02   0.11  -0.01    -0.10  -0.39   0.25    -0.30   0.14  -0.37
    16   6     0.00  -0.07  -0.02     0.08   0.02  -0.03     0.00  -0.01   0.06
    17   1     0.03  -0.04  -0.01     0.12   0.06  -0.03    -0.04  -0.03   0.08
    18   8     0.03  -0.13  -0.05     0.13  -0.07  -0.10     0.06  -0.02  -0.09
                      4                      5                      6
                      A                      A                      A
 Frequencies --    215.2456               231.0539               270.6446
 Red. masses --      1.1197                 1.2367                 2.2874
 Frc consts  --      0.0306                 0.0389                 0.0987
 IR Inten    --      0.1714                 2.5080                 5.8891
  Atom  AN      X      Y      Z        X      Y      Z        X      Y      Z
     1   7     0.00  -0.03   0.02    -0.02   0.01  -0.05    -0.01   0.00   0.01
     2   6     0.05   0.00   0.01    -0.01   0.04  -0.01    -0.03   0.05   0.07
     3   1     0.09  -0.01   0.06     0.02   0.04   0.03    -0.01   0.04   0.09
     4   1     0.07   0.04  -0.04     0.00   0.09  -0.05     0.00   0.06   0.04
     5   6     0.04  -0.01   0.00     0.00   0.03   0.01    -0.10   0.13  -0.06
     6   1     0.26   0.16   0.05     0.40   0.35   0.11    -0.06   0.04  -0.23
     7   1    -0.13   0.05  -0.21    -0.30   0.13  -0.36    -0.14   0.20  -0.04
     8   1     0.00  -0.23   0.17    -0.05  -0.38   0.30    -0.17   0.26  -0.08
     9   6    -0.01   0.01   0.01    -0.03   0.02  -0.02     0.03  -0.09  -0.01
    10   1    -0.04   0.03  -0.02    -0.03   0.02  -0.04     0.04  -0.14   0.09
    11   1     0.03   0.04   0.03    -0.05   0.03  -0.01     0.01  -0.16  -0.07
    12   6    -0.04   0.03  -0.03     0.00  -0.01   0.01     0.06   0.00   0.03
    13   1    -0.33  -0.28  -0.27     0.17   0.14   0.13    -0.04  -0.11  -0.06
    14   1    -0.09   0.52  -0.14     0.02  -0.26   0.09     0.00   0.22   0.05
    15   1     0.27  -0.10   0.29    -0.15   0.05  -0.14     0.27  -0.04   0.13
    16   6    -0.02  -0.02   0.01     0.02  -0.01  -0.01     0.09  -0.07  -0.16
    17   1    -0.05  -0.02   0.04     0.08   0.03  -0.02     0.30  -0.19  -0.55
    18   8    -0.01   0.00  -0.02     0.02  -0.08   0.05    -0.04  -0.02   0.13
                      7                      8                      9
                      A                      A                      A
 Frequencies --    323.2212               344.9173               417.7907
 Red. masses --      2.4044                 2.4004                 2.2857
 Frc consts  --      0.1480                 0.1683                 0.2351
 IR Inten    --     10.3665                 3.4230                 2.2572
  Atom  AN      X      Y      Z        X      Y      Z        X      Y      Z
     1   7    -0.03   0.03  -0.10     0.01  -0.02   0.01    -0.04  -0.09   0.07
     2   6     0.13   0.18  -0.03     0.11  -0.01  -0.02     0.09   0.00   0.10
     3   1     0.25   0.25   0.23     0.18   0.00   0.08     0.22   0.00   0.29
     4   1     0.24   0.37  -0.25     0.16   0.05  -0.11     0.18   0.16  -0.07
     5   6     0.01   0.03   0.02     0.09  -0.08  -0.01     0.00   0.03   0.00
     6   1    -0.29  -0.15   0.03    -0.02  -0.11   0.03    -0.03  -0.08  -0.13
     7   1     0.24  -0.16   0.14     0.18  -0.16   0.02     0.01   0.04   0.03
     8   1    -0.02   0.24  -0.08     0.09  -0.03  -0.04    -0.08   0.18  -0.03
     9   6    -0.06  -0.06  -0.01    -0.07   0.10   0.09     0.01   0.13  -0.10
    10   1    -0.03  -0.12   0.09    -0.15   0.18  -0.06    -0.11   0.29  -0.39
    11   1    -0.10  -0.15  -0.08    -0.04   0.23   0.20     0.13   0.39   0.14
    12   6    -0.06  -0.01   0.00    -0.18  -0.01   0.00     0.11   0.04  -0.03
    13   1    -0.13  -0.05  -0.03    -0.19   0.03   0.04     0.32   0.10  -0.02
    14   1    -0.07   0.09  -0.02    -0.06  -0.18  -0.16     0.06  -0.09   0.13
    15   1     0.02  -0.02   0.03    -0.44   0.00  -0.04     0.09   0.05  -0.06
    16   6    -0.04   0.03   0.04     0.09  -0.05  -0.13    -0.09  -0.10   0.01
    17   1    -0.01   0.19   0.22     0.23  -0.17  -0.44    -0.12  -0.14   0.00
    18   8     0.03  -0.18   0.05    -0.03   0.06   0.08    -0.10  -0.06  -0.04
                     10                     11                     12
                      A                      A                      A
 Frequencies --    508.3918               642.6016               773.4092
 Red. masses --      3.2189                 3.4989                 1.5675
 Frc consts  --      0.4902                 0.8513                 0.5524
 IR Inten    --     15.2561                 5.4574                 0.5451
  Atom  AN      X      Y      Z        X      Y      Z        X      Y      Z
     1   7    -0.18   0.16   0.23     0.10   0.05  -0.02     0.02   0.05  -0.01
     2   6     0.00   0.03  -0.14    -0.01   0.04  -0.04     0.11  -0.02   0.11
     3   1     0.08  -0.06  -0.13    -0.19   0.02  -0.31    -0.07  -0.20  -0.34
     4   1     0.04  -0.06  -0.12    -0.13  -0.14   0.17    -0.21  -0.16   0.47
     5   6     0.09  -0.11  -0.02    -0.02   0.01   0.00     0.06  -0.03   0.00
     6   1    -0.09   0.02   0.31    -0.06   0.03   0.07     0.02  -0.22  -0.23
     7   1     0.25  -0.30   0.00     0.00  -0.07  -0.06     0.00  -0.20  -0.28
     8   1     0.23  -0.32  -0.01    -0.05  -0.05   0.06    -0.35   0.16   0.20
     9   6     0.00  -0.01  -0.06     0.22   0.08   0.21    -0.05   0.01  -0.06
    10   1     0.18  -0.07   0.05     0.18   0.10   0.15    -0.04  -0.03   0.01
    11   1     0.00  -0.09  -0.15     0.16   0.08   0.22    -0.03  -0.05  -0.13
    12   6     0.09   0.01  -0.01     0.07   0.01  -0.01    -0.04   0.00   0.00
    13   1     0.22   0.01  -0.04    -0.23  -0.03   0.01     0.11  -0.02  -0.05
    14   1    -0.03   0.08   0.20     0.30  -0.03  -0.44    -0.11  -0.02   0.15
    15   1     0.28   0.01   0.02    -0.23  -0.01  -0.02     0.02  -0.03   0.07
    16   6    -0.02   0.04  -0.07    -0.14   0.04  -0.10    -0.02   0.08  -0.04
    17   1     0.15   0.00  -0.31    -0.14   0.06  -0.08     0.01   0.13  -0.03
    18   8    -0.04  -0.06   0.03    -0.15  -0.18  -0.01    -0.01  -0.04   0.01
                     13                     14                     15
                      A                      A                      A
 Frequencies --    792.0894               827.3839               946.3727
 Red. masses --      1.1907                 1.7307                 2.1613
 Frc consts  --      0.4402                 0.6980                 1.1405
 IR Inten    --      2.0716                17.2981                 4.1483
  Atom  AN      X      Y      Z        X      Y      Z        X      Y      Z
     1   7     0.01   0.01  -0.01     0.00  -0.07   0.02     0.11   0.00   0.03
     2   6    -0.01  -0.05   0.04     0.03   0.09  -0.10     0.05  -0.04  -0.05
     3   1     0.02   0.06   0.20     0.05  -0.16  -0.35    -0.01   0.02  -0.06
     4   1     0.10   0.02  -0.11    -0.19   0.04   0.12     0.18  -0.22  -0.05
     5   6     0.01  -0.03   0.00    -0.03   0.10   0.02    -0.09   0.06   0.02
     6   1     0.12  -0.02  -0.09    -0.32   0.09   0.26    -0.11   0.20   0.24
     7   1    -0.06   0.14   0.10     0.14  -0.32  -0.21    -0.01   0.09   0.17
     8   1     0.11   0.00  -0.10    -0.23   0.00   0.23     0.12  -0.09  -0.04
     9   6    -0.01   0.10   0.00    -0.01   0.04   0.01     0.12   0.00  -0.11
    10   1    -0.04  -0.15   0.45    -0.08  -0.07   0.20     0.22   0.02  -0.13
    11   1     0.10  -0.25  -0.37     0.14  -0.09  -0.15     0.31   0.03  -0.13
    12   6     0.01   0.04  -0.01     0.01   0.03  -0.01    -0.19  -0.01   0.07
    13   1     0.28  -0.18  -0.27     0.17  -0.10  -0.17     0.12   0.04   0.06
    14   1     0.05  -0.17   0.00     0.04  -0.11  -0.02    -0.40   0.00   0.49
    15   1    -0.25  -0.15   0.32    -0.15  -0.08   0.18     0.06  -0.03   0.16
    16   6    -0.01   0.01  -0.01     0.03  -0.14   0.06    -0.02   0.02  -0.03
    17   1     0.00   0.01  -0.02    -0.04  -0.20   0.06    -0.08   0.00   0.01
    18   8    -0.01  -0.01   0.00     0.01   0.04  -0.01    -0.03  -0.03   0.00
                     16                     17                     18
                      A                      A                      A
 Frequencies --    995.2269              1017.5861              1085.1239
 Red. masses --      2.6713                 1.6201                 2.0387
 Frc consts  --      1.5589                 0.9884                 1.4144
 IR Inten    --      0.7756                 0.3909                13.8139
  Atom  AN      X      Y      Z        X      Y      Z        X      Y      Z
     1   7     0.00  -0.01   0.00    -0.01   0.01   0.05     0.10  -0.03   0.01
     2   6    -0.16   0.19   0.05    -0.01   0.02   0.00    -0.01   0.12   0.05
     3   1    -0.23   0.28   0.05    -0.05   0.06  -0.02    -0.21   0.22  -0.11
     4   1    -0.29   0.35   0.06    -0.01   0.01   0.01     0.04  -0.18   0.21
     5   6     0.13  -0.13  -0.09     0.00  -0.02   0.00    -0.02  -0.04  -0.08
     6   1     0.21  -0.24  -0.33     0.06  -0.03  -0.06     0.04   0.13   0.11
     7   1     0.03  -0.08  -0.20    -0.03   0.04   0.01     0.05   0.03   0.11
     8   1     0.01   0.02  -0.09     0.01   0.02  -0.02     0.25  -0.19  -0.20
     9   6     0.13   0.02  -0.05    -0.01   0.00   0.01    -0.12  -0.05   0.13
    10   1     0.25   0.02  -0.04    -0.01   0.00   0.00    -0.21   0.02   0.00
    11   1     0.24   0.02  -0.07     0.01   0.00   0.01     0.10   0.08   0.21
    12   6    -0.09  -0.01   0.07     0.00   0.00  -0.01     0.00   0.01  -0.15
    13   1    -0.03   0.02   0.08     0.03   0.00  -0.02     0.43   0.02  -0.23
    14   1    -0.16   0.01   0.19     0.00  -0.01   0.01    -0.19  -0.06   0.28
    15   1    -0.02  -0.01   0.09     0.01   0.00   0.01     0.27  -0.04   0.00
    16   6     0.00  -0.09   0.06     0.09  -0.07  -0.18    -0.01   0.01   0.01
    17   1    -0.01  -0.18  -0.03    -0.41   0.28   0.82    -0.01  -0.05  -0.06
    18   8    -0.01   0.01  -0.02    -0.02   0.02   0.05     0.00  -0.01   0.00
                     19                     20                     21
                      A                      A                      A
 Frequencies --   1101.3194              1122.4625              1124.3261
 Red. masses --      1.7686                 1.8781                 1.6845
 Frc consts  --      1.2639                 1.3942                 1.2546
 IR Inten    --      1.3634                53.6202                32.0880
  Atom  AN      X      Y      Z        X      Y      Z        X      Y      Z
     1   7     0.01  -0.01   0.00    -0.07  -0.06  -0.05     0.02   0.04  -0.05
     2   6    -0.03   0.02   0.15    -0.10  -0.09   0.04     0.00  -0.03   0.09
     3   1     0.00  -0.06   0.09     0.24  -0.29   0.30     0.03  -0.06   0.09
     4   1     0.07  -0.11   0.16    -0.08   0.26  -0.19     0.04   0.00   0.03
     5   6    -0.01   0.02  -0.14     0.06   0.06  -0.04     0.00   0.03  -0.06
     6   1    -0.21   0.22   0.34    -0.22  -0.02   0.10    -0.14   0.09   0.17
     7   1     0.28  -0.24  -0.01     0.19  -0.27  -0.23     0.15  -0.15  -0.04
     8   1     0.24  -0.36  -0.10    -0.14  -0.04   0.17     0.06  -0.16   0.01
     9   6     0.00  -0.04  -0.10     0.08  -0.02   0.11    -0.03   0.15   0.03
    10   1    -0.19  -0.03  -0.14    -0.01   0.04  -0.03     0.40   0.01   0.31
    11   1    -0.01   0.03  -0.03     0.24   0.05   0.14    -0.31  -0.15  -0.20
    12   6     0.02   0.04   0.08    -0.04   0.01  -0.06     0.00  -0.10  -0.03
    13   1    -0.20  -0.09   0.00     0.26   0.03  -0.10    -0.09   0.15   0.22
    14   1     0.20  -0.06  -0.23    -0.16  -0.05   0.22    -0.13   0.20   0.09
    15   1    -0.31  -0.01   0.12     0.14  -0.04   0.08     0.34   0.07  -0.31
    16   6     0.00   0.02  -0.02     0.01   0.11  -0.05     0.00  -0.08   0.01
    17   1    -0.03   0.07   0.07     0.04   0.21   0.05    -0.07  -0.10   0.07
    18   8     0.00   0.00   0.00     0.02   0.00   0.01    -0.02   0.00  -0.01
                     22                     23                     24
                      A                      A                      A
 Frequencies --   1240.8688              1285.5514              1338.1801
 Red. masses --      2.6938                 1.5451                 1.2382
 Frc consts  --      2.4438                 1.5044                 1.3064
 IR Inten    --     28.1922                54.0747                15.5051
  Atom  AN      X      Y      Z        X      Y      Z        X      Y      Z
     1   7     0.23  -0.01   0.13     0.00   0.11  -0.04    -0.08   0.03  -0.04
     2   6    -0.16  -0.03  -0.07     0.00  -0.05   0.02     0.02  -0.04   0.01
     3   1    -0.12   0.27   0.33    -0.12   0.15   0.08    -0.36   0.48   0.07
     4   1     0.16  -0.06  -0.31     0.12  -0.11  -0.06     0.31  -0.41  -0.02
     5   6     0.11   0.07   0.02     0.03   0.03   0.00     0.05   0.04   0.00
     6   1    -0.17  -0.15  -0.05    -0.06  -0.04  -0.02    -0.08  -0.04   0.00
     7   1     0.08  -0.19  -0.33     0.05  -0.07  -0.08     0.07  -0.08  -0.11
     8   1    -0.26   0.13   0.26    -0.06  -0.01   0.09    -0.11   0.02   0.13
     9   6    -0.12   0.00  -0.06     0.01  -0.08   0.02     0.01   0.00   0.02
    10   1    -0.20  -0.05   0.03     0.49   0.06  -0.21    -0.23  -0.02   0.03
    11   1    -0.18  -0.03  -0.07    -0.49   0.03   0.26     0.41   0.04  -0.05
    12   6     0.02  -0.02   0.00    -0.02   0.10  -0.02     0.01  -0.03   0.00
    13   1    -0.10  -0.01   0.03     0.18  -0.09  -0.24    -0.05   0.02   0.07
    14   1     0.02   0.03  -0.03     0.01  -0.18   0.05     0.00   0.02   0.00
    15   1    -0.03   0.02  -0.08    -0.13  -0.05   0.26     0.06   0.00  -0.05
    16   6    -0.01   0.06  -0.02     0.00  -0.09   0.03     0.00  -0.05   0.02
    17   1    -0.21  -0.16  -0.07    -0.06  -0.14   0.02     0.19   0.13   0.04
    18   8    -0.03  -0.04   0.00    -0.01   0.00  -0.01    -0.01   0.02  -0.01
                     25                     26                     27
                      A                      A                      A
 Frequencies --   1386.3602              1404.2260              1415.0839
 Red. masses --      1.2624                 1.2759                 1.2548
 Frc consts  --      1.4295                 1.4823                 1.4804
 IR Inten    --     12.1053                 8.6812                 3.5562
  Atom  AN      X      Y      Z        X      Y      Z        X      Y      Z
     1   7     0.01   0.00  -0.03     0.02  -0.03   0.02    -0.01   0.01  -0.01
     2   6    -0.06   0.07   0.01     0.05  -0.07  -0.01    -0.03   0.04   0.02
     3   1     0.25  -0.33  -0.01    -0.20   0.29   0.05     0.11  -0.17  -0.03
     4   1     0.29  -0.35  -0.04    -0.33   0.37   0.05     0.19  -0.19  -0.03
     5   6     0.00   0.00   0.04     0.01  -0.01  -0.05     0.08  -0.08  -0.06
     6   1     0.07  -0.09  -0.15    -0.13   0.08   0.20    -0.20   0.11   0.42
     7   1    -0.02  -0.09  -0.12    -0.01   0.17   0.15    -0.20   0.44   0.15
     8   1     0.11   0.01  -0.06    -0.16  -0.01   0.10    -0.40   0.26   0.13
     9   6    -0.10  -0.01   0.02    -0.10  -0.01   0.02     0.02   0.00  -0.01
    10   1     0.49   0.08  -0.12     0.47   0.09  -0.13    -0.08  -0.01   0.01
    11   1     0.43   0.02  -0.09     0.36  -0.01  -0.11    -0.07   0.00   0.02
    12   6     0.00   0.01   0.04     0.02   0.01   0.03    -0.04   0.00   0.03
    13   1     0.05  -0.09  -0.07    -0.01  -0.10  -0.08     0.19  -0.03  -0.05
    14   1     0.10   0.01  -0.15     0.08  -0.02  -0.08     0.08  -0.02  -0.19
    15   1     0.00   0.07  -0.10    -0.03   0.06  -0.08     0.17   0.06  -0.06
    16   6     0.00   0.00   0.00    -0.01   0.01  -0.01     0.00  -0.01   0.00
    17   1     0.01   0.02   0.01     0.10   0.11  -0.01    -0.05  -0.06   0.00
    18   8    -0.01   0.00   0.00     0.00   0.00   0.00     0.00   0.00   0.00
                     28                     29                     30
                      A                      A                      A
 Frequencies --   1420.4416              1428.3553              1457.7171
 Red. masses --      1.2378                 1.2523                 1.9176
 Frc consts  --      1.4715                 1.5053                 2.4008
 IR Inten    --     17.2630                52.5222                54.3621
  Atom  AN      X      Y      Z        X      Y      Z        X      Y      Z
     1   7     0.00   0.02   0.00    -0.02   0.09  -0.04     0.10   0.18  -0.01
     2   6     0.02  -0.03   0.00     0.01  -0.03   0.02    -0.02  -0.04   0.03
     3   1    -0.06   0.10   0.03     0.00  -0.06  -0.05     0.13  -0.36  -0.15
     4   1    -0.11   0.12   0.02    -0.01   0.11  -0.06    -0.05   0.40  -0.23
     5   6    -0.03   0.03   0.02     0.00   0.00  -0.01    -0.01  -0.01   0.00
     6   1     0.07  -0.03  -0.15     0.00   0.00   0.01     0.00  -0.02  -0.02
     7   1     0.09  -0.16  -0.04     0.01   0.03   0.05    -0.01   0.04   0.06
     8   1     0.13  -0.10  -0.03    -0.03  -0.02   0.03     0.00  -0.05   0.02
     9   6     0.02   0.00  -0.01    -0.02  -0.02   0.03    -0.04  -0.05  -0.02
    10   1    -0.16  -0.03   0.03    -0.15   0.05  -0.11    -0.31  -0.13   0.13
    11   1     0.00   0.02   0.02     0.36  -0.01  -0.07     0.34   0.21   0.17
    12   6    -0.10   0.00   0.08     0.03  -0.01  -0.01     0.00  -0.01   0.00
    13   1     0.44  -0.11  -0.16    -0.12   0.03   0.06    -0.04  -0.04  -0.02
    14   1     0.21  -0.07  -0.48    -0.04   0.02   0.10    -0.03   0.00   0.05
    15   1     0.44   0.17  -0.21    -0.08  -0.04   0.03     0.00   0.02  -0.07
    16   6     0.00   0.00   0.00    -0.01   0.01  -0.01     0.01  -0.12   0.05
    17   1    -0.14  -0.13  -0.03    -0.63  -0.58  -0.11     0.38   0.23   0.11
    18   8     0.01   0.00   0.00     0.05  -0.01   0.03    -0.07   0.00  -0.04
                     31                     32                     33
                      A                      A                      A
 Frequencies --   1483.0280              1495.1872              1497.1798
 Red. masses --      1.0779                 1.0756                 1.0753
 Frc consts  --      1.3968                 1.4168                 1.4201
 IR Inten    --      8.5311                 3.2772                 2.4746
  Atom  AN      X      Y      Z        X      Y      Z        X      Y      Z
     1   7     0.00   0.03  -0.02     0.02   0.03   0.00     0.02   0.03   0.00
     2   6     0.01   0.00  -0.05    -0.01  -0.01  -0.02    -0.01   0.00  -0.01
     3   1     0.27   0.10   0.47     0.11   0.02   0.20     0.08   0.01   0.13
     4   1    -0.32  -0.22   0.38    -0.13  -0.05   0.11    -0.09  -0.03   0.07
     5   6     0.00  -0.01   0.00    -0.02  -0.03   0.01    -0.01   0.00  -0.01
     6   1    -0.04   0.03   0.09     0.26   0.28   0.19     0.08   0.05   0.00
     7   1    -0.09   0.01  -0.12     0.06  -0.22  -0.12     0.06  -0.05   0.05
     8   1     0.05   0.10  -0.10    -0.05   0.38  -0.21    -0.05   0.03   0.01
     9   6     0.00  -0.01  -0.03    -0.01   0.00   0.03     0.00  -0.02   0.03
    10   1     0.01  -0.15   0.25    -0.08   0.12  -0.21    -0.08   0.15  -0.30
    11   1     0.08   0.24   0.22     0.04  -0.18  -0.19    -0.02  -0.22  -0.17
    12   6     0.01  -0.01   0.01    -0.01   0.02  -0.02    -0.01  -0.04  -0.01
    13   1     0.03  -0.11  -0.11    -0.23   0.06   0.08     0.43   0.25   0.17
    14   1    -0.07   0.14   0.09     0.08  -0.36  -0.01    -0.03   0.53  -0.20
    15   1    -0.17   0.07  -0.18     0.29  -0.05   0.18    -0.31  -0.11   0.12
    16   6     0.01  -0.01   0.01     0.01  -0.02   0.01     0.01  -0.02   0.01
    17   1    -0.06  -0.06   0.01     0.06   0.03   0.02     0.08   0.04   0.02
    18   8    -0.01   0.00   0.00    -0.02   0.00  -0.01    -0.02   0.00  -0.01
                     34                     35                     36
                      A                      A                      A
 Frequencies --   1499.5276              1506.7523              1510.6931
 Red. masses --      1.0523                 1.0597                 1.0811
 Frc consts  --      1.3941                 1.4175                 1.4536
 IR Inten    --      9.2622                 6.8631                 7.5246
  Atom  AN      X      Y      Z        X      Y      Z        X      Y      Z
     1   7    -0.01  -0.02   0.00     0.00   0.00   0.00     0.00  -0.01   0.00
     2   6    -0.01  -0.02   0.03     0.02  -0.02   0.03     0.00   0.00   0.00
     3   1    -0.17   0.01  -0.19    -0.15   0.03  -0.15    -0.03   0.02  -0.02
     4   1     0.16   0.08  -0.19     0.05   0.16  -0.10     0.02   0.00  -0.02
     5   6    -0.02  -0.02   0.00     0.02  -0.01   0.04    -0.01   0.00  -0.01
     6   1     0.37   0.32   0.13    -0.28  -0.02   0.25     0.15   0.10   0.00
     7   1     0.20  -0.27   0.01    -0.37   0.02  -0.54     0.12  -0.08   0.11
     8   1    -0.16   0.36  -0.11     0.32   0.22  -0.36    -0.11   0.06   0.04
     9   6     0.01   0.00  -0.01    -0.01   0.00  -0.01    -0.04  -0.01  -0.05
    10   1     0.06  -0.06   0.11     0.04  -0.02   0.03     0.21  -0.20   0.33
    11   1    -0.03   0.09   0.10     0.02   0.04   0.03     0.11   0.33   0.26
    12   6     0.01  -0.01   0.02     0.00  -0.01   0.00    -0.01  -0.01  -0.03
    13   1     0.10  -0.19  -0.19     0.10   0.09   0.07     0.07   0.36   0.32
    14   1    -0.09   0.21   0.10     0.01   0.10  -0.08     0.10   0.01  -0.24
    15   1    -0.23   0.12  -0.27    -0.04  -0.05   0.08     0.11  -0.21   0.41
    16   6    -0.01   0.01  -0.01    -0.01   0.00  -0.01    -0.01   0.01  -0.01
    17   1    -0.03  -0.01  -0.01    -0.02   0.00  -0.01    -0.05  -0.02  -0.02
    18   8     0.01   0.00   0.00     0.01   0.00   0.00     0.01   0.00   0.01
                     37                     38                     39
                      A                      A                      A
 Frequencies --   1750.0191              2935.9877              3033.1524
 Red. masses --      8.0925                 1.0837                 1.0557
 Frc consts  --     14.6022                 5.5039                 5.7222
 IR Inten    --    449.1892                88.9211                15.2347
  Atom  AN      X      Y      Z        X      Y      Z        X      Y      Z
     1   7    -0.09  -0.05  -0.03     0.00   0.00   0.00     0.00   0.00   0.00
     2   6     0.03  -0.01   0.02     0.00   0.00   0.00     0.00   0.00  -0.01
     3   1    -0.18   0.10  -0.16    -0.01  -0.01   0.01    -0.07  -0.06   0.05
     4   1     0.06   0.11  -0.05     0.00   0.00   0.01     0.03   0.03   0.04
     5   6     0.00   0.00  -0.01     0.00   0.00   0.00    -0.01   0.02   0.02
     6   1    -0.04   0.01   0.04     0.00   0.00   0.00     0.13  -0.21   0.15
     7   1    -0.01   0.04   0.02     0.00   0.00   0.00     0.17   0.13  -0.10
     8   1     0.01  -0.03   0.00     0.00   0.00   0.00    -0.19  -0.14  -0.23
     9   6    -0.02  -0.01   0.00     0.00   0.00   0.00     0.00  -0.03  -0.05
    10   1     0.10  -0.04   0.04     0.00  -0.02   0.00    -0.03   0.65   0.34
    11   1     0.04   0.05   0.01     0.00   0.04  -0.03     0.07  -0.28   0.26
    12   6     0.01   0.00   0.00     0.00   0.00   0.00     0.00   0.00   0.01
    13   1     0.00   0.00   0.01     0.00   0.00   0.00    -0.02   0.08  -0.07
    14   1     0.02   0.01  -0.03     0.00   0.00   0.00     0.03   0.01   0.01
    15   1    -0.02   0.00   0.01     0.00   0.00   0.00     0.01  -0.14  -0.07
    16   6     0.57   0.23   0.20    -0.04   0.06  -0.04     0.00   0.00   0.00
    17   1    -0.22  -0.50   0.07     0.55  -0.66   0.51     0.02  -0.02   0.01
    18   8    -0.35  -0.10  -0.14     0.00   0.00   0.00     0.00   0.00   0.00
                     40                     41                     42
                      A                      A                      A
 Frequencies --   3036.0780              3037.0725              3055.8398
 Red. masses --      1.0356                 1.0426                 1.0644
 Frc consts  --      5.6243                 5.6658                 5.8563
 IR Inten    --     10.1634                42.6728                25.0185
  Atom  AN      X      Y      Z        X      Y      Z        X      Y      Z
     1   7     0.00   0.00   0.00     0.00   0.00   0.00     0.00   0.00   0.00
     2   6     0.00   0.00  -0.01     0.00   0.00   0.00    -0.03  -0.03   0.06
     3   1    -0.07  -0.06   0.05    -0.02  -0.02   0.02     0.60   0.49  -0.41
     4   1     0.02   0.01   0.02    -0.01  -0.01  -0.01    -0.26  -0.18  -0.28
     5   6     0.01  -0.02  -0.01     0.02  -0.03  -0.02     0.00   0.01  -0.01
     6   1    -0.12   0.20  -0.15    -0.21   0.33  -0.25     0.04  -0.07   0.05
     7   1    -0.14  -0.12   0.09    -0.25  -0.20   0.15    -0.08  -0.06   0.05
     8   1     0.17   0.12   0.20     0.27   0.19   0.33     0.02   0.01   0.02
     9   6     0.00   0.00  -0.01     0.00  -0.02  -0.03     0.00   0.00  -0.01
    10   1     0.00   0.05   0.03    -0.01   0.39   0.20     0.00   0.08   0.04
    11   1     0.01  -0.03   0.03     0.05  -0.18   0.17     0.02  -0.07   0.07
    12   6    -0.03   0.00   0.03     0.02   0.00  -0.01     0.00   0.00   0.00
    13   1    -0.08   0.34  -0.34     0.04  -0.15   0.16    -0.01   0.02  -0.02
    14   1     0.46   0.11   0.25    -0.27  -0.06  -0.15     0.06   0.01   0.03
    15   1     0.03  -0.45  -0.21    -0.01   0.18   0.09     0.00  -0.08  -0.04
    16   6     0.00   0.00   0.00     0.00   0.00   0.00     0.00   0.00   0.00
    17   1     0.00   0.00   0.00     0.01  -0.02   0.01     0.01  -0.01   0.01
    18   8     0.00   0.00   0.00     0.00   0.00   0.00     0.00   0.00   0.00
                     43                     44                     45
                      A                      A                      A
 Frequencies --   3072.5685              3092.0387              3101.0768
 Red. masses --      1.1010                 1.1018                 1.1009
 Frc consts  --      6.1241                 6.2064                 6.2377
 IR Inten    --      8.1031                15.8074                37.2881
  Atom  AN      X      Y      Z        X      Y      Z        X      Y      Z
     1   7     0.00   0.00   0.00     0.00   0.00   0.00     0.00   0.00   0.00
     2   6     0.00   0.00   0.00    -0.03  -0.02  -0.01     0.00   0.00   0.00
     3   1    -0.02  -0.02   0.02     0.15   0.12  -0.11    -0.02  -0.02   0.01
     4   1     0.00   0.00   0.00     0.20   0.14   0.23     0.01   0.00   0.01
     5   6     0.00   0.00   0.00     0.06   0.00   0.06     0.00   0.00   0.00
     6   1     0.01  -0.01   0.01    -0.26   0.44  -0.31     0.01  -0.01   0.01
     7   1     0.02   0.01  -0.01    -0.11  -0.10   0.09     0.01   0.01   0.00
     8   1     0.01   0.01   0.01    -0.38  -0.29  -0.47     0.02   0.02   0.02
     9   6    -0.01   0.08  -0.03     0.00   0.00   0.00     0.00   0.01  -0.01
    10   1     0.01  -0.38  -0.21     0.00  -0.02  -0.01     0.00   0.03   0.01
    11   1     0.15  -0.58   0.57     0.01  -0.02   0.02     0.03  -0.11   0.11
    12   6     0.01  -0.03   0.01     0.00   0.00   0.00    -0.06  -0.01  -0.07
    13   1    -0.04   0.19  -0.19     0.00  -0.01   0.01     0.07  -0.36   0.35
    14   1    -0.06  -0.02  -0.03     0.03   0.01   0.01     0.66   0.15   0.34
    15   1    -0.01   0.18   0.09     0.00   0.00   0.00    -0.04   0.32   0.14
    16   6     0.00   0.00   0.00     0.00   0.00   0.00     0.00   0.00   0.00
    17   1     0.02  -0.02   0.02     0.00   0.00   0.00     0.00  -0.01   0.00
    18   8     0.00   0.00   0.00     0.00   0.00   0.00     0.00   0.00   0.00
                     46                     47                     48
                      A                      A                      A
 Frequencies --   3108.8254              3110.1035              3122.9155
 Red. masses --      1.0980                 1.1039                 1.1042
 Frc consts  --      6.2526                 6.2911                 6.3451
 IR Inten    --     21.7682                29.5912                22.0649
  Atom  AN      X      Y      Z        X      Y      Z        X      Y      Z
     1   7     0.00   0.00   0.00     0.00   0.00   0.00     0.00   0.00   0.00
     2   6    -0.04  -0.03  -0.03     0.00   0.00   0.00    -0.05  -0.04  -0.02
     3   1     0.10   0.09  -0.08    -0.02  -0.02   0.01     0.24   0.19  -0.17
     4   1     0.37   0.27   0.43     0.00   0.00   0.00     0.33   0.24   0.38
     5   6     0.01   0.05  -0.05    -0.01  -0.01   0.00    -0.05  -0.05   0.01
     6   1     0.22  -0.35   0.25    -0.02   0.03  -0.03    -0.07   0.10  -0.08
     7   1    -0.40  -0.31   0.24     0.08   0.06  -0.05     0.45   0.35  -0.28
     8   1     0.05   0.05   0.05     0.02   0.01   0.02     0.20   0.15   0.26
     9   6     0.00   0.00   0.00     0.00   0.03  -0.01     0.00   0.00   0.00
    10   1     0.00  -0.02  -0.01     0.01  -0.18  -0.10     0.00   0.03   0.02
    11   1     0.01  -0.02   0.02     0.04  -0.17   0.17     0.00   0.01  -0.01
    12   6     0.00   0.01   0.00     0.00   0.09   0.00     0.00  -0.01   0.00
    13   1     0.01  -0.03   0.03     0.09  -0.40   0.43    -0.01   0.04  -0.04
    14   1    -0.02   0.00  -0.01    -0.10  -0.01  -0.05     0.00   0.00   0.00
    15   1     0.00  -0.06  -0.03     0.05  -0.63  -0.32     0.00   0.04   0.02
    16   6     0.00   0.00   0.00     0.00   0.00   0.00     0.00   0.00   0.00
    17   1     0.00   0.00   0.00     0.01  -0.01   0.01     0.00   0.00   0.00
    18   8     0.00   0.00   0.00     0.00   0.00   0.00     0.00   0.00   0.00

 -------------------
 - Thermochemistry -
 -------------------
 Temperature   298.150 Kelvin.  Pressure   1.00000 Atm.
 Atom     1 has atomic number  7 and mass  14.00307
 Atom     2 has atomic number  6 and mass  12.00000
 Atom     3 has atomic number  1 and mass   1.00783
 Atom     4 has atomic number  1 and mass   1.00783
 Atom     5 has atomic number  6 and mass  12.00000
 Atom     6 has atomic number  1 and mass   1.00783
 Atom     7 has atomic number  1 and mass   1.00783
 Atom     8 has atomic number  1 and mass   1.00783
 Atom     9 has atomic number  6 and mass  12.00000
 Atom    10 has atomic number  1 and mass   1.00783
 Atom    11 has atomic number  1 and mass   1.00783
 Atom    12 has atomic number  6 and mass  12.00000
 Atom    13 has atomic number  1 and mass   1.00783
 Atom    14 has atomic number  1 and mass   1.00783
 Atom    15 has atomic number  1 and mass   1.00783
 Atom    16 has atomic number  6 and mass  12.00000
 Atom    17 has atomic number  1 and mass   1.00783
 Atom    18 has atomic number  8 and mass  15.99491
 Molecular mass:   101.08406 amu.
 Principal axes and moments of inertia in atomic units:
                           1         2         3
     Eigenvalues --   585.01932 864.997741270.00429
           X            0.99354  -0.11326  -0.00665
           Y            0.11319   0.99353  -0.00945
           Z            0.00767   0.00864   0.99993
 This molecule is an asymmetric top.
 Rotational symmetry number  1.
 Warning -- assumption of classical behavior for rotation
           may cause significant error
 Rotational temperatures (Kelvin)      0.14805     0.10013     0.06820
 Rotational constants (GHZ):           3.08493     2.08641     1.42105
 Zero-point vibrational energy     417611.5 (Joules/Mol)
                                   99.81154 (Kcal/Mol)
 Warning -- explicit consideration of  10 degrees of freedom as
           vibrations may cause significant error
 Vibrational temperatures:     68.76   103.18   195.23   309.69   332.43
          (Kelvin)            389.40   465.04   496.26   601.11   731.46
                              924.56  1112.76  1139.64  1190.42  1361.62
                             1431.91  1464.08  1561.25  1584.55  1614.97
                             1617.65  1785.33  1849.62  1925.34  1994.66
                             2020.37  2035.99  2043.70  2055.08  2097.33
                             2133.74  2151.24  2154.11  2157.48  2167.88
                             2173.55  2517.88  4224.23  4364.02  4368.23
                             4369.66  4396.67  4420.74  4448.75  4461.75
                             4472.90  4474.74  4493.17
 
 Zero-point correction=                           0.159060 (Hartree/Particle)
 Thermal correction to Energy=                    0.167667
 Thermal correction to Enthalpy=                  0.168612
 Thermal correction to Gibbs Free Energy=         0.125433
 Sum of electronic and zero-point Energies=           -327.103530
 Sum of electronic and thermal Energies=              -327.094922
 Sum of electronic and thermal Enthalpies=            -327.093978
 Sum of electronic and thermal Free Energies=         -327.137156
 
                     E (Thermal)             CV                S
                      KCal/Mol        Cal/Mol-Kelvin    Cal/Mol-Kelvin
 Total                  105.213             29.770             90.877
 Electronic               0.000              0.000              0.000
 Translational            0.889              2.981             39.750
 Rotational               0.889              2.981             27.954
 Vibrational            103.435             23.809             23.173
 Vibration     1          0.595              1.978              4.907
 Vibration     2          0.598              1.967              4.106
 Vibration     3          0.614              1.918              2.864
 Vibration     4          0.645              1.818              1.999
 Vibration     5          0.653              1.794              1.871
 Vibration     6          0.674              1.727              1.592
 Vibration     7          0.708              1.629              1.294
 Vibration     8          0.723              1.586              1.189
 Vibration     9          0.781              1.432              0.900
 Vibration    10          0.864              1.231              0.637
                       Q            Log10(Q)             Ln(Q)
 Total Bot       0.201816D-57        -57.695045       -132.847750
 Total V=0       0.293249D+16         15.467237         35.614629
 Vib (Bot)       0.176049D-70        -70.754366       -162.917948
 Vib (Bot)    1  0.432681D+01          0.636167          1.464830
 Vib (Bot)    2  0.287535D+01          0.458690          1.056173
 Vib (Bot)    3  0.150019D+01          0.176146          0.405591
 Vib (Bot)    4  0.920782D+00         -0.035843         -0.082532
 Vib (Bot)    5  0.852041D+00         -0.069539         -0.160120
 Vib (Bot)    6  0.713844D+00         -0.146397         -0.337091
 Vib (Bot)    7  0.580467D+00         -0.236222         -0.543922
 Vib (Bot)    8  0.536665D+00         -0.270297         -0.622381
 Vib (Bot)    9  0.420989D+00         -0.375729         -0.865148
 Vib (Bot)   10  0.320865D+00         -0.493678         -1.136735
 Vib (V=0)       0.255809D+03          2.407916          5.544432
 Vib (V=0)    1  0.485560D+01          0.686243          1.580133
 Vib (V=0)    2  0.341850D+01          0.533835          1.229200
 Vib (V=0)    3  0.208132D+01          0.318339          0.733002
 Vib (V=0)    4  0.154778D+01          0.189709          0.436820
 Vib (V=0)    5  0.148791D+01          0.172578          0.397375
 Vib (V=0)    6  0.137153D+01          0.137207          0.315930
 Vib (V=0)    7  0.126612D+01          0.102475          0.235958
 Vib (V=0)    8  0.123349D+01          0.091136          0.209849
 Vib (V=0)    9  0.115363D+01          0.062066          0.142913
 Vib (V=0)   10  0.109410D+01          0.039057          0.089932
 Electronic      0.100000D+01          0.000000          0.000000
 Translational   0.399465D+08          7.601479         17.503053
 Rotational      0.286973D+06          5.457842         12.567145
 ***** Axes restored to original set *****
 -------------------------------------------------------------------
 Center     Atomic                   Forces (Hartrees/Bohr)
 Number     Number              X              Y              Z
 -------------------------------------------------------------------
      1        7          -0.000000601   -0.000000411   -0.000002228
      2        6           0.000000336    0.000001375    0.000001702
      3        1           0.000000833    0.000004420    0.000004565
      4        1          -0.000000722    0.000003478   -0.000000556
      5        6           0.000002106   -0.000003444    0.000004616
      6        1           0.000002806   -0.000001841    0.000007461
      7        1           0.000001595   -0.000006364    0.000001759
      8        1           0.000003179   -0.000005651    0.000006811
      9        6           0.000000035   -0.000000988   -0.000000269
     10        1           0.000001645   -0.000003068    0.000003456
     11        1          -0.000000499   -0.000003681   -0.000003219
     12        6          -0.000000643    0.000004582    0.000000374
     13        1          -0.000000129    0.000007435    0.000003268
     14        1          -0.000000034    0.000003920    0.000001793
     15        1          -0.000002204    0.000006630   -0.000003416
     16        6          -0.000002134   -0.000001788   -0.000007263
     17        1          -0.000002740   -0.000003131   -0.000009743
     18        8          -0.000002831   -0.000001473   -0.000009111
 -------------------------------------------------------------------
 Cartesian Forces:  Max     0.000009743 RMS     0.000003813
 FormGI is forming the generalized inverse of G from B-inverse, IUseBI=4.

 GradGradGradGradGradGradGradGradGradGradGradGradGradGradGradGradGradGrad
 Berny optimization.
 Internal  Forces:  Max     0.000000131 RMS     0.000000027
 Search for a local minimum.
 Step number   1 out of a maximum of    2
 All quantities printed in internal units (Hartrees-Bohrs-Radians)
 Second derivative matrix not updated -- analytic derivatives used.
 ITU=  0
     Eigenvalues ---    0.00138   0.00213   0.00253   0.00268   0.00569
     Eigenvalues ---    0.01814   0.04272   0.04323   0.04383   0.04423
     Eigenvalues ---    0.04471   0.04499   0.04803   0.04970   0.08201
     Eigenvalues ---    0.08426   0.08531   0.11848   0.11961   0.12273
     Eigenvalues ---    0.12318   0.13273   0.13528   0.14762   0.16046
     Eigenvalues ---    0.16271   0.20215   0.20774   0.23184   0.23405
     Eigenvalues ---    0.25657   0.27950   0.28306   0.31380   0.32422
     Eigenvalues ---    0.32830   0.33184   0.33379   0.33475   0.33519
     Eigenvalues ---    0.33610   0.33891   0.34372   0.34456   0.35431
     Eigenvalues ---    0.36214   0.44641   0.81582
 Angle between quadratic step and forces=  76.29 degrees.
 Linear search not attempted -- first point.
 Iteration  1 RMS(Cart)=  0.00000603 RMS(Int)=  0.00000000
 Iteration  2 RMS(Cart)=  0.00000000 RMS(Int)=  0.00000000
 Variable       Old X    -DE/DX   Delta X   Delta X   Delta X     New X
                                 (Linear)    (Quad)   (Total)
    R1        2.76688   0.00000   0.00000   0.00000   0.00000   2.76688
    R2        2.75869   0.00000   0.00000   0.00000   0.00000   2.75869
    R3        2.56761   0.00000   0.00000   0.00000   0.00000   2.56761
    R4        2.06346   0.00000   0.00000   0.00000   0.00000   2.06346
    R5        2.05879   0.00000   0.00000   0.00000   0.00000   2.05879
    R6        2.88888   0.00000   0.00000   0.00000   0.00000   2.88888
    R7        2.06434   0.00000   0.00000   0.00000   0.00000   2.06434
    R8        2.06060   0.00000   0.00000   0.00000   0.00000   2.06060
    R9        2.06421   0.00000   0.00000   0.00000   0.00000   2.06421
   R10        2.06687   0.00000   0.00000   0.00000   0.00000   2.06687
   R11        2.06386   0.00000   0.00000   0.00000   0.00000   2.06386
   R12        2.88908   0.00000   0.00000   0.00000   0.00000   2.88908
   R13        2.06268   0.00000   0.00000   0.00000   0.00000   2.06268
   R14        2.06447   0.00000   0.00000   0.00000   0.00000   2.06447
   R15        2.06258   0.00000   0.00000   0.00000   0.00000   2.06258
   R16        2.08874   0.00000   0.00000   0.00000   0.00000   2.08874
   R17        2.30051   0.00000   0.00000   0.00000   0.00000   2.30051
    A1        2.08446   0.00000   0.00000   0.00000   0.00000   2.08446
    A2        2.08416   0.00000   0.00000   0.00000   0.00000   2.08416
    A3        2.11420   0.00000   0.00000   0.00000   0.00000   2.11420
    A4        1.88757   0.00000   0.00000   0.00000   0.00000   1.88757
    A5        1.87181   0.00000   0.00000   0.00000   0.00000   1.87180
    A6        1.97223   0.00000   0.00000   0.00000   0.00000   1.97223
    A7        1.88132   0.00000   0.00000   0.00000   0.00000   1.88132
    A8        1.92977   0.00000   0.00000   0.00000   0.00000   1.92977
    A9        1.91803   0.00000   0.00000   0.00000   0.00000   1.91803
   A10        1.92313   0.00000   0.00000   0.00000   0.00000   1.92313
   A11        1.92750   0.00000   0.00000   0.00000   0.00000   1.92750
   A12        1.94755   0.00000   0.00000   0.00000   0.00000   1.94755
   A13        1.88840   0.00000   0.00000   0.00000   0.00000   1.88840
   A14        1.88215   0.00000   0.00000   0.00000   0.00000   1.88214
   A15        1.89346   0.00000   0.00000   0.00000   0.00000   1.89346
   A16        1.89585   0.00000   0.00000   0.00000   0.00000   1.89585
   A17        1.87948   0.00000   0.00000   0.00000   0.00000   1.87948
   A18        1.98800   0.00000   0.00000   0.00000   0.00000   1.98800
   A19        1.85778   0.00000   0.00000   0.00000   0.00000   1.85778
   A20        1.92316   0.00000   0.00000   0.00000   0.00000   1.92316
   A21        1.91459   0.00000   0.00000   0.00000   0.00000   1.91459
   A22        1.94920   0.00000   0.00000   0.00000   0.00000   1.94920
   A23        1.92340   0.00000   0.00000   0.00000   0.00000   1.92340
   A24        1.93345   0.00000   0.00000   0.00000   0.00000   1.93345
   A25        1.87980   0.00000   0.00000   0.00000   0.00000   1.87980
   A26        1.88576   0.00000   0.00000   0.00000   0.00000   1.88576
   A27        1.89027   0.00000   0.00000   0.00000   0.00000   1.89027
   A28        1.96036   0.00000   0.00000   0.00000   0.00000   1.96036
   A29        2.19154   0.00000   0.00000   0.00000   0.00000   2.19154
   A30        2.13129   0.00000   0.00000   0.00000   0.00000   2.13129
    D1        0.61642   0.00000   0.00000   0.00001   0.00001   0.61643
    D2        2.64111   0.00000   0.00000   0.00001   0.00001   2.64112
    D3       -1.52575   0.00000   0.00000   0.00001   0.00001  -1.52574
    D4       -2.55374   0.00000   0.00000   0.00001   0.00001  -2.55373
    D5       -0.52905   0.00000   0.00000   0.00001   0.00001  -0.52904
    D6        1.58728   0.00000   0.00000   0.00001   0.00001   1.58729
    D7        0.78382   0.00000   0.00000   0.00000   0.00000   0.78382
    D8        2.78914   0.00000   0.00000   0.00000   0.00000   2.78915
    D9       -1.36663   0.00000   0.00000   0.00000   0.00000  -1.36663
   D10       -2.32871   0.00000   0.00000   0.00000   0.00000  -2.32871
   D11       -0.32338   0.00000   0.00000   0.00000   0.00000  -0.32338
   D12        1.80403   0.00000   0.00000   0.00000   0.00000   1.80403
   D13       -3.11919   0.00000   0.00000   0.00000   0.00000  -3.11919
   D14        0.02351   0.00000   0.00000   0.00000   0.00000   0.02351
   D15       -0.00666   0.00000   0.00000   0.00000   0.00000  -0.00666
   D16        3.13604   0.00000   0.00000   0.00000   0.00000   3.13604
   D17        3.11773   0.00000   0.00000   0.00000   0.00000   3.11773
   D18       -1.08017   0.00000   0.00000   0.00000   0.00000  -1.08017
   D19        1.02739   0.00000   0.00000   0.00000   0.00000   1.02739
   D20        0.99923   0.00000   0.00000   0.00000   0.00000   0.99923
   D21        3.08452   0.00000   0.00000   0.00000   0.00000   3.08451
   D22       -1.09111   0.00000   0.00000   0.00000   0.00000  -1.09111
   D23       -1.07550   0.00000   0.00000   0.00000   0.00000  -1.07550
   D24        1.00979   0.00000   0.00000   0.00000   0.00000   1.00979
   D25        3.11735   0.00000   0.00000   0.00000   0.00000   3.11734
   D26        1.03810   0.00000   0.00000   0.00000   0.00000   1.03809
   D27        3.12674   0.00000   0.00000   0.00000   0.00000   3.12674
   D28       -1.06487   0.00000   0.00000   0.00000   0.00000  -1.06487
   D29       -1.09741   0.00000   0.00000   0.00000   0.00000  -1.09741
   D30        0.99123   0.00000   0.00000   0.00000   0.00000   0.99123
   D31        3.08281   0.00000   0.00000   0.00000   0.00000   3.08281
   D32       -3.13720   0.00000   0.00000   0.00000   0.00000  -3.13720
   D33       -1.04855   0.00000   0.00000   0.00000   0.00000  -1.04856
   D34        1.04303   0.00000   0.00000   0.00000   0.00000   1.04302
         Item               Value     Threshold  Converged?
 Maximum Force            0.000000     0.000015     YES
 RMS     Force            0.000000     0.000010     YES
 Maximum Displacement     0.000018     0.000060     YES
 RMS     Displacement     0.000006     0.000040     YES
 Predicted change in Energy=-7.593520D-13
 Optimization completed.
    -- Stationary point found.
                           ----------------------------
                           !   Optimized Parameters   !
                           ! (Angstroms and Degrees)  !
 --------------------------                            --------------------------
 ! Name  Definition              Value          Derivative Info.                !
 --------------------------------------------------------------------------------
 ! R1    R(1,2)                  1.4642         -DE/DX =    0.0                 !
 ! R2    R(1,9)                  1.4598         -DE/DX =    0.0                 !
 ! R3    R(1,16)                 1.3587         -DE/DX =    0.0                 !
 ! R4    R(2,3)                  1.0919         -DE/DX =    0.0                 !
 ! R5    R(2,4)                  1.0895         -DE/DX =    0.0                 !
 ! R6    R(2,5)                  1.5287         -DE/DX =    0.0                 !
 ! R7    R(5,6)                  1.0924         -DE/DX =    0.0                 !
 ! R8    R(5,7)                  1.0904         -DE/DX =    0.0                 !
 ! R9    R(5,8)                  1.0923         -DE/DX =    0.0                 !
 ! R10   R(9,10)                 1.0937         -DE/DX =    0.0                 !
 ! R11   R(9,11)                 1.0921         -DE/DX =    0.0                 !
 ! R12   R(9,12)                 1.5288         -DE/DX =    0.0                 !
 ! R13   R(12,13)                1.0915         -DE/DX =    0.0                 !
 ! R14   R(12,14)                1.0925         -DE/DX =    0.0                 !
 ! R15   R(12,15)                1.0915         -DE/DX =    0.0                 !
 ! R16   R(16,17)                1.1053         -DE/DX =    0.0                 !
 ! R17   R(16,18)                1.2174         -DE/DX =    0.0                 !
 ! A1    A(2,1,9)              119.4308         -DE/DX =    0.0                 !
 ! A2    A(2,1,16)             119.4135         -DE/DX =    0.0                 !
 ! A3    A(9,1,16)             121.135          -DE/DX =    0.0                 !
 ! A4    A(1,2,3)              108.15           -DE/DX =    0.0                 !
 ! A5    A(1,2,4)              107.2465         -DE/DX =    0.0                 !
 ! A6    A(1,2,5)              113.0004         -DE/DX =    0.0                 !
 ! A7    A(3,2,4)              107.7918         -DE/DX =    0.0                 !
 ! A8    A(3,2,5)              110.5676         -DE/DX =    0.0                 !
 ! A9    A(4,2,5)              109.8951         -DE/DX =    0.0                 !
 ! A10   A(2,5,6)              110.1872         -DE/DX =    0.0                 !
 ! A11   A(2,5,7)              110.4374         -DE/DX =    0.0                 !
 ! A12   A(2,5,8)              111.5867         -DE/DX =    0.0                 !
 ! A13   A(6,5,7)              108.1972         -DE/DX =    0.0                 !
 ! A14   A(6,5,8)              107.839          -DE/DX =    0.0                 !
 ! A15   A(7,5,8)              108.4872         -DE/DX =    0.0                 !
 ! A16   A(1,9,10)             108.6243         -DE/DX =    0.0                 !
 ! A17   A(1,9,11)             107.6861         -DE/DX =    0.0                 !
 ! A18   A(1,9,12)             113.9042         -DE/DX =    0.0                 !
 ! A19   A(10,9,11)            106.443          -DE/DX =    0.0                 !
 ! A20   A(10,9,12)            110.1891         -DE/DX =    0.0                 !
 ! A21   A(11,9,12)            109.6982         -DE/DX =    0.0                 !
 ! A22   A(9,12,13)            111.681          -DE/DX =    0.0                 !
 ! A23   A(9,12,14)            110.2025         -DE/DX =    0.0                 !
 ! A24   A(9,12,15)            110.7783         -DE/DX =    0.0                 !
 ! A25   A(13,12,14)           107.7047         -DE/DX =    0.0                 !
 ! A26   A(13,12,15)           108.0459         -DE/DX =    0.0                 !
 ! A27   A(14,12,15)           108.3046         -DE/DX =    0.0                 !
 ! A28   A(1,16,17)            112.3205         -DE/DX =    0.0                 !
 ! A29   A(1,16,18)            125.5657         -DE/DX =    0.0                 !
 ! A30   A(17,16,18)           122.1137         -DE/DX =    0.0                 !
 ! D1    D(9,1,2,3)             35.3183         -DE/DX =    0.0                 !
 ! D2    D(9,1,2,4)            151.3243         -DE/DX =    0.0                 !
 ! D3    D(9,1,2,5)            -87.4191         -DE/DX =    0.0                 !
 ! D4    D(16,1,2,3)          -146.3184         -DE/DX =    0.0                 !
 ! D5    D(16,1,2,4)           -30.3123         -DE/DX =    0.0                 !
 ! D6    D(16,1,2,5)            90.9442         -DE/DX =    0.0                 !
 ! D7    D(2,1,9,10)            44.9093         -DE/DX =    0.0                 !
 ! D8    D(2,1,9,11)           159.8062         -DE/DX =    0.0                 !
 ! D9    D(2,1,9,12)           -78.3022         -DE/DX =    0.0                 !
 ! D10   D(16,1,9,10)         -133.425          -DE/DX =    0.0                 !
 ! D11   D(16,1,9,11)          -18.5282         -DE/DX =    0.0                 !
 ! D12   D(16,1,9,12)          103.3634         -DE/DX =    0.0                 !
 ! D13   D(2,1,16,17)         -178.7164         -DE/DX =    0.0                 !
 ! D14   D(2,1,16,18)            1.3472         -DE/DX =    0.0                 !
 ! D15   D(9,1,16,17)           -0.3818         -DE/DX =    0.0                 !
 ! D16   D(9,1,16,18)          179.6818         -DE/DX =    0.0                 !
 ! D17   D(1,2,5,6)            178.6329         -DE/DX =    0.0                 !
 ! D18   D(1,2,5,7)            -61.8891         -DE/DX =    0.0                 !
 ! D19   D(1,2,5,8)             58.8651         -DE/DX =    0.0                 !
 ! D20   D(3,2,5,6)             57.2518         -DE/DX =    0.0                 !
 ! D21   D(3,2,5,7)            176.7298         -DE/DX =    0.0                 !
 ! D22   D(3,2,5,8)            -62.516          -DE/DX =    0.0                 !
 ! D23   D(4,2,5,6)            -61.6214         -DE/DX =    0.0                 !
 ! D24   D(4,2,5,7)             57.8566         -DE/DX =    0.0                 !
 ! D25   D(4,2,5,8)            178.6108         -DE/DX =    0.0                 !
 ! D26   D(1,9,12,13)           59.4785         -DE/DX =    0.0                 !
 ! D27   D(1,9,12,14)          179.1489         -DE/DX =    0.0                 !
 ! D28   D(1,9,12,15)          -61.0124         -DE/DX =    0.0                 !
 ! D29   D(10,9,12,13)         -62.8771         -DE/DX =    0.0                 !
 ! D30   D(10,9,12,14)          56.7933         -DE/DX =    0.0                 !
 ! D31   D(10,9,12,15)         176.632          -DE/DX =    0.0                 !
 ! D32   D(11,9,12,13)        -179.7482         -DE/DX =    0.0                 !
 ! D33   D(11,9,12,14)         -60.0777         -DE/DX =    0.0                 !
 ! D34   D(11,9,12,15)          59.761          -DE/DX =    0.0                 !
 --------------------------------------------------------------------------------
 GradGradGradGradGradGradGradGradGradGradGradGradGradGradGradGradGradGrad

 1\1\GINC-SRVMBFD\Freq\RB3LYP\TZVP\C5H11N1O1\JENS\20-Sep-2014\0\\#N Geo
 m=AllCheck Guess=TCheck SCRF=Check GenChk RB3LYP/TZVP Freq\\Title Card
  Required\\0,1\N,0.0637773258,0.1815795044,-0.0686226418\C,-0.63483090
 66,-0.9020150448,0.6253267138\H,0.1089143571,-1.5047732735,1.150538378
 4\H,-1.2801603268,-0.4431904005,1.3736342704\C,-1.4668290797,-1.774636
 6719,-0.3145285414\H,-1.9472186058,-2.5802014679,0.2454974785\H,-2.246
 0867918,-1.1817995395,-0.7944536592\H,-0.8493899326,-2.2297310156,-1.0
 92252318\C,1.384908495,-0.0657579762,-0.6383203361\H,1.3635568285,-1.0
 227749626,-1.1674101761\H,1.56934137,0.7010947597,-1.3937749746\C,2.51
 50383048,-0.057178268,0.3912805057\H,2.3650182925,-0.8163674948,1.1610
 553517\H,3.4709706436,-0.2625535833,-0.096069927\H,2.583014569,0.91461
 90705,0.8835214699\C,-0.5430188386,1.3901283301,-0.2002583976\H,0.0776
 112046,2.1125933327,-0.7611299537\O,-1.6414149091,1.6821977012,0.23589
 07572\\Version=EM64L-G09RevD.01\State=1-A\HF=-327.2625895\RMSD=1.610e-
 09\RMSF=3.813e-06\ZeroPoint=0.1590598\Thermal=0.1676674\Dipole=1.31545
 31,-0.9495693,-0.3162054\DipoleDeriv=-0.8860617,0.1824824,0.0353245,0.
 4251358,-1.1183659,0.0029906,-0.0330213,0.1564823,-0.3860603,0.287362,
 0.2492948,0.0261665,0.2348156,0.4538256,-0.056912,0.0637422,-0.1504533
 ,0.2645577,-0.0556863,0.043673,-0.1146188,0.0331469,-0.0472793,0.05508
 23,-0.0784965,0.0531848,0.0118222,-0.0029554,-0.0470296,0.0660113,0.00
 25157,0.0264594,-0.0798264,0.0300873,-0.0175428,-0.0065923,0.0415145,-
 0.0558112,-0.0481123,-0.0441923,0.0199576,-0.0137676,-0.0895084,-0.014
 7371,0.0272085,0.0214855,-0.0993143,0.0317689,-0.0913064,-0.0805196,0.
 0623102,0.0541941,0.0826856,0.0001235,-0.0182414,0.0327249,-0.0628259,
 0.0830595,0.0109564,0.0455173,-0.0576029,0.0104075,0.0217937,-0.028581
 6,0.0606733,0.099579,0.0270173,0.0300765,-0.0583813,0.056654,-0.082294
 2,-0.0526084,0.7475738,-0.0901183,-0.0143147,-0.0853138,0.1601674,0.05
 18255,-0.0692196,0.0958591,0.2930325,-0.0311977,0.0029932,-0.0367305,0
 .0376291,-0.0962793,-0.1183477,-0.0040918,-0.0905483,-0.0005681,-0.017
 3564,0.0062816,-0.005324,-0.0493179,-0.025986,0.1287972,0.0189958,0.06
 85402,-0.0347819,-0.0534715,0.0179056,-0.0516006,0.0072486,0.1002949,-
 0.0043496,-0.0800392,-0.0160148,0.0125806,0.0611356,-0.0495168,0.03092
 19,-0.0225533,-0.0381107,0.100691,-0.0106008,0.082555,-0.0408205,-0.14
 37435,0.04276,0.0558974,0.0398763,0.0688392,-0.0202402,0.087453,-0.018
 2483,0.0119996,0.048311,0.0241654,-0.0090712,-0.0275766,-0.0897965,-0.
 0851646,-0.0356883,-0.0542075,0.0142745,1.3338472,-0.7841576,-0.309845
 6,-0.7222936,1.4102137,-0.0886837,-0.302414,-0.0376314,0.3485964,-0.06
 67715,-0.1245616,0.1112149,-0.1049536,-0.0502264,0.0842469,0.1173746,0
 .1112117,-0.0142491,-1.2371626,0.5875554,0.195559,0.2570627,-0.734227,
 -0.0057877,0.3321818,-0.1792483,-0.4703088\Polar=80.4267669,-2.7950339
 ,74.9057139,-3.4371332,-1.549971,59.4530019\PG=C01 [X(C5H11N1O1)]\NIma
 g=0\\0.54400196,-0.10560297,0.62460765,-0.16572298,-0.11884423,0.23670
 365,-0.11937617,-0.01774954,0.03390003,0.55416925,-0.02139360,-0.14592
 710,0.04085490,-0.10313670,0.50897227,0.03484821,0.03476115,-0.0924121
 4,-0.01504184,0.00651168,0.52751062,0.01364504,-0.01539805,0.01084676,
 -0.17533686,0.10276841,-0.08346820,0.18908261,0.01487799,-0.02436178,0
 .01389200,0.09545625,-0.12379121,0.06484101,-0.10152010,0.14368288,-0.
 00844222,0.01769450,-0.00963423,-0.07956175,0.06347493,-0.10484441,0.0
 9068661,-0.07520190,0.11299469,-0.01533627,0.00117864,0.01308183,-0.14
 211485,0.06646911,0.10774804,-0.01209223,0.00853881,0.01372064,0.15846
 987,-0.02061369,0.00839252,0.02125228,0.07275813,-0.09922618,-0.082317
 92,0.00941173,-0.00671250,-0.01160819,-0.06616553,0.10927179,0.0145004
 5,-0.00011483,-0.01258495,0.10439018,-0.07453537,-0.17093298,-0.009837
 60,0.00613529,0.01322350,-0.11887459,0.08334398,0.18625228,-0.01261850
 ,-0.01970560,-0.00357160,-0.10723770,-0.02294671,-0.03694971,-0.012767
 26,-0.01465024,-0.01732209,0.01219333,0.00988817,0.01090497,0.53502067
 ,-0.02188902,-0.02922923,-0.00741949,-0.02220205,-0.10254786,-0.037222
 74,0.00901013,0.01159019,0.01018049,-0.00897507,-0.00829151,-0.0115063
 8,-0.03840984,0.53518642,0.01121756,0.01478164,0.01475618,-0.03811124,
 -0.04101156,-0.12964635,-0.00816221,-0.01011230,-0.01055546,-0.0148794
 9,-0.01336088,-0.01524995,-0.03504490,-0.04113351,0.53337593,-0.001835
 97,-0.00459450,-0.00228661,-0.00753224,-0.01106843,0.01086375,-0.00003
 403,0.00067533,0.00033693,0.00065158,0.00016843,0.00003090,-0.09649416
 ,-0.08306268,0.05830997,0.10190050,-0.00287023,-0.00371600,-0.00269313
 ,-0.00573050,-0.01230955,0.01137833,-0.00019417,0.00077449,-0.00002291
 ,0.00065079,-0.00003485,0.00004206,-0.08345706,-0.18776791,0.09916975,
 0.09391399,0.20319151,-0.00276627,-0.00405814,-0.00136545,-0.00844001,
 -0.01467245,0.01170768,0.00034240,0.00078861,0.00090133,0.00080169,0.0
 0038376,0.00077151,0.05955973,0.10075356,-0.11891426,-0.06408389,-0.10
 882768,0.12618358,0.00137923,0.00094199,0.00110933,-0.01390837,0.00905
 842,-0.00944854,-0.00067865,-0.00246133,-0.00206877,0.00080700,-0.0000
 5645,0.00056454,-0.18263416,0.10495592,-0.08079653,0.01205758,-0.00814
 009,0.00664863,0.19651703,0.00115846,0.00186739,0.00033594,-0.01617298
 ,0.01095454,-0.01018242,-0.00286544,-0.00182336,-0.00302640,0.00043191
 ,0.00090169,0.00080457,0.10661340,-0.12996017,0.06581450,0.01706734,-0
 .01265333,0.00894312,-0.11354880,0.13814177,0.00176084,-0.00029953,0.0
 0114573,-0.01597762,0.01236268,-0.01149784,-0.00220362,-0.00313763,-0.
 00171627,0.00025196,0.00067567,0.00044541,-0.08060327,0.06301598,-0.09
 716277,-0.01196083,0.00837759,-0.00758334,0.09189733,-0.06821715,0.104
 49691,0.00116434,0.00161124,0.00041667,0.01204448,-0.00887732,-0.01523
 841,0.00103915,0.00057970,0.00080131,-0.00177096,-0.00268350,-0.002667
 67,-0.13516182,0.06215056,0.10617608,-0.00871948,0.00619592,0.00890277
 ,-0.01293474,0.00761770,0.01679695,0.14476008,0.00135639,0.00185560,0.
 00075468,0.01081530,-0.00912121,-0.01408218,-0.00029030,0.00067708,0.0
 0075776,-0.00274881,-0.00116349,-0.00239956,0.06209950,-0.09140928,-0.
 07422733,-0.01382817,0.01141329,0.01711124,0.00960082,-0.00736018,-0.0
 1336434,-0.06624049,0.09621474,0.00007332,0.00130693,0.00137419,0.0127
 9712,-0.00844270,-0.01647918,0.00008260,0.00048856,0.00032089,-0.00337
 777,-0.00185158,-0.00137098,0.10486553,-0.07507865,-0.17639320,0.00906
 053,-0.00700381,-0.01179444,-0.00800796,0.00549396,0.01152986,-0.11531
 950,0.08539568,0.19215910,-0.16989196,0.01695333,0.05286508,-0.0128622
 0,-0.00507869,0.00918010,0.00042156,0.00210371,-0.00140993,0.00070533,
 0.00044166,-0.00142303,0.00052158,0.00096622,-0.00156835,0.00075493,0.
 00078240,0.00008628,-0.00042487,-0.00018684,0.00018471,-0.00021221,-0.
 00009578,0.00039769,0.43774891,0.01962348,-0.10982877,0.00688677,-0.02
 107170,0.01055033,0.00729309,0.00031697,0.00010828,0.00062452,-0.00262
 146,-0.00358071,0.00218582,-0.00112245,-0.00059157,0.00261722,-0.00028
 259,-0.00057033,-0.00066705,0.00016248,-0.00002993,-0.00022218,-0.0000
 7318,-0.00058928,-0.00067889,0.01426041,0.62386289,0.05035665,0.009751
 62,-0.08509878,0.01446377,-0.00145802,-0.01231056,0.00076829,-0.001026
 79,0.00062557,0.00226233,0.00261037,-0.00183724,-0.00147116,-0.0010794
 7,0.00138815,-0.00024678,-0.00063217,-0.00030564,0.00018318,0.00004498
 ,-0.00017698,-0.00025022,-0.00044578,-0.00014830,-0.01576696,-0.020089
 36,0.52739163,-0.01016406,0.03584372,0.01601065,0.00161585,0.00116083,
 -0.00060960,-0.00012233,-0.00024523,0.00020476,0.00009147,0.00006165,-
 0.00011138,-0.00039585,0.00027101,0.00004747,0.00024528,-0.00014084,-0
 .00022326,0.00009815,0.00002918,0.00001695,-0.00052118,-0.00068648,-0.
 00023028,-0.04745331,-0.01440653,-0.00512502,0.06264521,0.00574882,-0.
 00400992,-0.00177600,-0.00037468,-0.00051006,0.00152934,-0.00028604,0.
 00036809,-0.00007648,0.00012350,0.00001320,-0.00005789,0.00016656,0.00
 034904,-0.00062244,0.00017657,0.00020750,0.00016196,-0.00003079,-0.000
 01353,0.00006909,-0.00041360,0.00011046,0.00019561,-0.00848945,-0.2468
 8298,-0.10379060,0.00538181,0.26593707,0.00897661,-0.01469414,-0.00525
 440,-0.00051938,-0.00114617,0.00078813,0.00004715,0.00014833,-0.000597
 57,-0.00016648,0.00011129,-0.00005042,0.00028482,0.00021835,-0.0001333
 5,0.00001831,0.00009648,0.00001914,-0.00020452,0.00000249,0.00004687,0
 .00010982,0.00006244,0.00028943,-0.00545398,-0.10140751,-0.10516079,0.
 00363073,0.11619654,0.11284305,-0.01413459,-0.02423266,0.02344919,-0.0
 0311203,0.00457833,0.00289576,0.00017476,-0.00000508,-0.00006608,-0.00
 102441,-0.00129056,0.00081093,0.00019115,0.00010901,0.00015330,-0.0000
 2180,-0.00003953,-0.00008021,-0.00005017,0.00000717,-0.00000425,0.0000
 7292,-0.00005594,-0.00013351,-0.05391069,-0.02425485,0.02629713,0.0001
 2269,-0.00071350,-0.00026553,0.07017205,-0.00123308,0.00491627,-0.0043
 8683,0.00054598,0.00019473,0.00019290,0.00007410,0.00005514,-0.0002796
 3,0.00006636,-0.00015188,-0.00020626,0.00009894,0.00015361,0.00010990,
 -0.00002553,-0.00003468,0.00000008,-0.00010457,0.00003015,0.00003512,0
 .00019393,0.00005412,0.00010529,-0.03125965,-0.18190368,0.12623420,-0.
 00463835,-0.01954043,0.01921809,0.03117358,0.19238680,0.00866233,0.009
 21706,-0.00993216,0.00076554,-0.00244574,-0.00064793,-0.00019340,-0.00
 012842,0.00005350,0.00031496,0.00066061,-0.00025057,0.00003648,-0.0000
 1252,-0.00004873,-0.00001529,0.00001319,0.00006234,-0.00001526,0.00003
 319,0.00006107,0.00008656,0.00008049,0.00012515,0.03015053,0.12165168,
 -0.16832594,-0.00321944,-0.01009788,0.01195211,-0.03316442,-0.13746138
 ,0.18357800,-0.04010017,0.00719187,-0.01308604,0.00019410,0.00096326,-
 0.00188469,-0.00026653,-0.00016754,0.00030052,0.00025303,0.00012387,-0
 .00013586,-0.00028528,0.00005285,0.00027000,-0.00002408,-0.00022068,-0
 .00008971,0.00004556,-0.00001488,-0.00000836,0.00000443,-0.00016990,-0
 .00014179,-0.11990711,-0.00362950,-0.05108714,-0.00140813,-0.00067852,
 -0.00396679,0.00349956,0.00067254,0.00100435,0.50568328,0.00859182,0.0
 0102391,0.00313546,-0.00046544,0.00024263,0.00000448,-0.00058013,-0.00
 028841,0.00001771,0.00001057,0.00011246,-0.00007660,0.00033848,-0.0005
 1918,-0.00030712,-0.00005283,0.00011569,0.00009336,0.00002265,0.000080
 84,0.00016458,-0.00005098,0.00025529,0.00020283,-0.00553655,-0.0831565
 8,-0.00224318,-0.02222860,0.00110971,-0.02169384,0.01804631,0.00171962
 ,0.01711745,-0.00293949,0.57182578,0.01274973,-0.00252665,0.01596621,0
 .00033847,-0.00223823,0.00146126,-0.00015616,0.00033185,0.00001624,0.0
 0025592,-0.00006871,0.00009037,-0.00003016,0.00035022,-0.00040089,0.00
 006181,0.00014309,0.00009306,-0.00011800,-0.00005939,-0.00013204,-0.00
 007272,0.00003648,0.00006561,-0.05445390,0.00044551,-0.13956962,-0.012
 48672,0.00053646,-0.01180546,-0.01840009,-0.00147297,-0.01688291,-0.05
 507085,0.00171268,0.52828127,0.00220440,-0.00035478,0.00127945,-0.0007
 5544,0.00019919,-0.00064143,-0.00092886,-0.00059895,0.00004976,0.00013
 576,-0.00010878,0.00017273,0.00003090,-0.00022540,0.00001563,-0.000018
 13,0.00001203,-0.00000301,0.00005265,0.00005513,0.00006227,-0.00001851
 ,0.00005311,0.00003446,0.00389163,0.01907627,-0.01893164,0.00081625,-0
 .00020692,0.00116684,-0.00357020,-0.00019240,-0.00379803,-0.05310425,-
 0.02772927,0.02773617,0.05615869,-0.00001714,-0.00021344,-0.00000522,0
 .00004545,-0.00041162,0.00004750,-0.00044191,0.00046151,-0.00011862,0.
 00016705,-0.00000251,0.00001874,-0.00009046,0.00027635,-0.00011128,0.0
 0003001,0.00001337,0.00001028,-0.00005685,-0.00006769,-0.00008178,-0.0
 0002083,-0.00004935,-0.00005761,0.00104318,0.00118370,-0.00125206,0.00
 062757,0.00066751,0.00010751,-0.00043468,0.00139027,-0.00039569,-0.027
 53047,-0.17693821,0.12788360,0.03121611,0.18840268,0.00070442,-0.00063
 289,0.00122761,-0.00016380,0.00089406,-0.00025705,0.00002425,-0.000411
 58,0.00046845,0.00000592,-0.00016676,0.00016620,0.00008130,-0.00029965
 ,0.00009750,-0.00004960,-0.00001684,0.00000093,0.00010329,0.00005459,0
 .00006582,-0.00002062,0.00005561,-0.00004000,0.00434370,0.01609759,-0.
 01712831,0.00042770,-0.00023988,0.00048068,-0.00373745,-0.00085262,-0.
 00191628,0.02645645,0.12753535,-0.17522553,-0.02735637,-0.14141249,0.1
 9058654,-0.00528179,0.00173493,-0.00419767,0.00051253,0.00100360,-0.00
 060670,0.00022782,-0.00005883,0.00005828,-0.00006935,0.00003718,-0.000
 03332,-0.00008852,-0.00010383,0.00014961,-0.00004235,-0.00009613,-0.00
 002906,0.00002889,0.00002293,0.00001105,0.00002489,-0.00001775,-0.0000
 4509,-0.01787189,0.00428199,0.01387957,0.00057373,-0.00079238,0.000122
 83,0.00062199,0.00060511,-0.00001868,-0.24516297,0.04229570,0.10192345
 ,-0.00350233,0.00022185,0.00181717,0.26759297,0.00038931,0.00080191,0.
 00047571,0.00005338,-0.00019629,0.00027230,0.00011103,0.00026292,-0.00
 009627,-0.00000540,-0.00000192,-0.00001783,-0.00000312,0.00021688,-0.0
 0008485,0.00003265,0.00002706,0.00001445,-0.00003442,-0.00004982,-0.00
 004571,-0.00000364,-0.00002465,-0.00002561,-0.00067897,-0.00150309,0.0
 0013773,0.00003007,0.00007159,0.00022093,0.00010103,-0.00006404,-0.000
 03231,0.04273983,-0.05651499,-0.02297977,-0.02106178,0.00472823,0.0097
 9829,-0.04739621,0.05610649,-0.00474719,0.00124426,-0.00238433,-0.0002
 6523,0.00056447,-0.00044906,0.00002197,-0.00032024,0.00005309,-0.00005
 664,-0.00003860,0.00002645,-0.00000795,-0.00017089,0.00013220,-0.00002
 356,-0.00004365,-0.00003618,0.00004225,0.00004797,0.00005384,0.0000108
 1,0.00000610,0.00000893,-0.01890344,0.00433352,0.01174651,0.00080830,-
 0.00037361,0.00092425,0.00076633,0.00036987,0.00084677,0.10401838,-0.0
 2318920,-0.10216314,0.01936313,-0.00539168,-0.01018175,-0.11192388,0.0
 2483625,0.10799947,0.00301201,-0.00046660,0.00110319,-0.00024083,-0.00
 036098,0.00019425,0.00000452,0.00004885,-0.00013679,-0.00006321,0.0000
 0307,-0.00002155,0.00004307,-0.00001850,-0.00011317,-0.00000836,0.0000
 5173,0.00004297,-0.00003258,-0.00000037,-0.00000193,-0.00000482,0.0000
 9524,0.00008859,-0.00325194,-0.02365050,-0.01281141,-0.00333746,0.0001
 6017,-0.00375498,0.00089509,0.00040951,0.00099919,-0.04822821,-0.01139
 958,-0.00467581,-0.00115864,-0.00476928,-0.00236425,0.00285679,0.02608
 385,0.01175447,0.04982647,-0.00042232,0.00119834,0.00085805,-0.0000503
 2,-0.00024029,0.00016418,0.00003656,0.00005033,-0.00019616,-0.00013071
 ,0.00001756,-0.00005854,-0.00000299,0.00006456,-0.00006400,0.00001824,
 -0.00000205,-0.00000174,-0.00003324,-0.00000558,-0.00000581,0.00000888
 ,0.00000069,0.00003858,0.00074437,0.00077739,0.00024020,0.00057169,0.0
 0156677,0.00033043,-0.00041238,0.00083037,-0.00030309,-0.01273064,-0.2
 5976296,-0.10409883,-0.00048501,-0.01947738,-0.01016950,0.00001672,-0.
 00423082,-0.00130072,0.01336842,0.27921538,0.00139125,0.00142937,0.001
 44227,-0.00005861,0.00026929,-0.00022521,0.00007071,-0.00003096,0.0000
 2580,0.00002374,-0.00001691,0.00005562,0.00011893,-0.00010108,-0.00013
 626,-0.00001835,0.00004187,0.00004609,-0.00000571,0.00000128,0.0000327
 5,-0.00001377,0.00009018,0.00005441,-0.00100567,-0.02217898,-0.0124854
 8,-0.00391085,0.00060728,-0.00237932,0.00074805,-0.00004584,0.00055798
 ,-0.00628676,-0.10286934,-0.09848171,0.00077238,0.02078573,0.01149480,
 -0.00136826,-0.01231356,-0.00678371,0.00993272,0.11447291,0.10646892,-
 0.13477736,0.05206558,0.02675605,0.02000061,-0.00918725,-0.01029971,-0
 .00423171,-0.00313572,0.00449322,-0.00131362,-0.00390844,0.00487861,-0
 .00070663,-0.00530156,0.00591026,-0.00220301,-0.00175077,-0.00141594,-
 0.00105293,-0.00082727,-0.00158838,0.00008686,0.00106626,-0.00002893,-
 0.02741174,0.02737386,0.00116891,-0.00002762,-0.00031152,-0.00142537,-
 0.00006697,0.00402391,-0.00147618,-0.00046900,0.00155989,0.00058644,-0
 .00030912,-0.00017204,0.00017908,0.00060706,-0.00052225,-0.00041631,-0
 .00041996,-0.00028099,-0.00025621,0.82618750,0.07236480,-0.28056098,0.
 04583842,-0.00088355,-0.03906550,0.01745195,-0.00026276,0.00058845,-0.
 00179188,0.00211540,0.00182641,-0.00242103,0.00187071,0.00202959,-0.00
 170440,0.00108088,0.00164438,0.00012151,-0.00031868,-0.00000099,0.0006
 1535,-0.00020836,-0.00076047,-0.00000311,0.02005837,-0.00281053,-0.016
 14689,-0.00350560,0.00031217,0.00367095,-0.00439655,-0.00103271,0.0043
 8060,-0.00654159,0.00150920,0.00438784,0.00082909,-0.00014388,-0.00000
 541,-0.00291113,0.00028854,-0.00129545,0.00034560,-0.00020858,-0.00053
 212,-0.09928931,0.60301773,0.01879842,0.05829375,-0.07619618,-0.009573
 29,0.01939407,-0.00045791,0.00268113,0.00387900,-0.00313689,0.00007913
 ,0.00226198,-0.00054618,-0.00020681,-0.00054315,-0.00139044,0.00016785
 ,0.00026682,0.00020512,0.00002259,0.00015624,0.00080425,0.00020793,-0.
 00021991,-0.00000571,0.00237914,-0.01918393,-0.00509909,0.00601328,-0.
 00205956,-0.00255979,0.00151800,-0.00137310,0.00019898,-0.00136587,0.0
 0095434,0.00021115,0.00004003,0.00022098,-0.00012023,-0.00035611,-0.00
 006155,-0.00018971,-0.00004073,-0.00005388,0.00063366,-0.28171189,-0.0
 9861298,0.35843620,0.00884005,0.00816251,-0.00234449,0.00039410,0.0027
 9023,0.00229352,-0.00001181,0.00009973,0.00005232,-0.00012260,-0.00011
 835,-0.00011999,0.00028815,0.00065756,-0.00063579,0.00013379,0.0000941
 2,0.00013778,-0.00001861,0.00001466,0.00006381,0.00000570,-0.00007695,
 -0.00007417,-0.00065079,0.00212332,-0.00120867,0.00026645,-0.00018298,
 -0.00005511,0.00019420,0.00057519,-0.00026374,0.00030964,0.00007501,-0
 .00015555,-0.00006089,-0.00000159,-0.00007954,0.00011393,0.00002818,0.
 00004789,0.00004525,-0.00000363,0.00003066,-0.10997968,-0.08052742,0.0
 5428330,0.13372219,-0.01411103,-0.02944394,0.01992333,0.00568110,-0.00
 113324,0.00101663,-0.00102471,-0.00128287,0.00093531,0.00000855,0.0001
 5389,-0.00004926,0.00005456,0.00009603,0.00000900,-0.00006235,-0.00000
 946,-0.00011805,-0.00005292,-0.00001153,-0.00013391,-0.00000565,-0.000
 07920,-0.00011889,-0.00311523,-0.00106086,0.00218015,0.00021637,0.0002
 8450,-0.00030528,0.00097626,0.00048067,-0.00123553,0.00060647,-0.00001
 706,-0.00034403,-0.00021347,0.00010831,-0.00019953,0.00014231,0.000034
 81,0.00008031,0.00008974,0.00003138,0.00014640,-0.06963369,-0.15853138
 ,0.06992893,0.07988733,0.17198040,0.00718650,0.00998450,0.00274022,0.0
 0110003,0.00020685,0.00580865,-0.00057643,-0.00015347,0.00047762,0.000
 33542,-0.00070409,0.00022871,0.00067642,0.00106706,-0.00115589,0.00022
 218,0.00034499,0.00027432,-0.00012577,-0.00011771,-0.00019291,-0.00012
 913,0.00004004,0.00001370,-0.00023914,-0.00175709,-0.00045081,-0.00026
 102,-0.00035997,0.00047599,-0.00052008,0.00003522,0.00035477,-0.000228
 42,0.00026807,-0.00005223,0.00006169,-0.00007565,0.00005951,-0.0000772
 4,-0.00002855,-0.00006261,-0.00010000,0.00003234,-0.00013530,0.0494273
 0,0.07565814,-0.10929916,-0.08184331,-0.09133489,0.09764457,-0.0507301
 8,0.06242089,0.01039113,-0.00645422,-0.00694171,0.00616517,0.00187480,
 0.00046265,-0.00169671,0.00060013,0.00205141,-0.00302832,0.00010103,0.
 00201471,-0.00293821,0.00118995,0.00093901,0.00060910,0.00074899,0.000
 59870,0.00130239,0.00014088,-0.00087606,-0.00004085,0.00980478,0.00389
 399,-0.00248082,-0.00304514,0.00072297,0.00145506,-0.00005355,-0.00098
 557,0.00014449,-0.00103386,0.00004244,0.00196798,0.00013610,0.00018403
 ,-0.00037166,-0.00114140,0.00013646,-0.00048931,0.00006281,-0.00021263
 ,-0.00016427,-0.56391268,0.10018010,0.20706390,-0.03346908,0.00055636,
 0.02509099,0.64518064,0.06404201,-0.01737242,-0.01908265,0.00248187,0.
 00356562,-0.00165927,0.00113468,-0.00035924,-0.00126678,0.00088631,-0.
 00152397,-0.00108689,-0.00074186,0.00035404,0.00023766,-0.00018637,-0.
 00028912,-0.00003684,0.00009586,-0.00000027,0.00019197,0.00021963,-0.0
 0002417,0.00003341,-0.00291250,-0.00397426,0.00696508,0.00165773,-0.00
 004072,-0.00113689,0.00084402,0.00051566,-0.00104169,0.00227252,-0.000
 79773,-0.00203915,-0.00026416,0.00007213,-0.00002833,0.00101394,0.0000
 4720,0.00064130,0.00000965,0.00017491,0.00024447,0.10823132,-0.1281014
 3,-0.03324806,-0.01359691,0.01839954,0.00689422,-0.16518774,0.12935425
 ,0.01045237,-0.01729434,0.01950655,-0.00004237,0.00141730,-0.00711571,
 -0.00097428,0.00001864,0.00132415,-0.00152661,-0.00116631,0.00156323,-
 0.00132052,-0.00101814,0.00143757,-0.00038733,-0.00063400,-0.00026582,
 0.00021992,-0.00012974,-0.00022037,0.00020315,0.00034841,0.00029055,0.
 00063718,0.00404927,0.00694568,-0.00098227,0.00015804,0.00012144,-0.00
 026708,-0.00022203,0.00021386,0.00130258,-0.00082702,-0.00147164,-0.00
 002408,-0.00017226,0.00022109,0.00069405,-0.00006965,0.00045897,-0.000
 09477,0.00011557,-0.00018531,0.20521905,-0.02961147,-0.16148808,0.0298
 7108,-0.00038069,0.00327086,-0.24298007,0.04541842,0.13539298\\0.00000
 060,0.00000041,0.00000223,-0.00000034,-0.00000137,-0.00000170,-0.00000
 083,-0.00000442,-0.00000457,0.00000072,-0.00000348,0.00000056,-0.00000
 211,0.00000344,-0.00000462,-0.00000281,0.00000184,-0.00000746,-0.00000
 160,0.00000636,-0.00000176,-0.00000318,0.00000565,-0.00000681,-0.00000
 003,0.00000099,0.00000027,-0.00000164,0.00000307,-0.00000346,0.0000005
 0,0.00000368,0.00000322,0.00000064,-0.00000458,-0.00000037,0.00000013,
 -0.00000744,-0.00000327,0.00000003,-0.00000392,-0.00000179,0.00000220,
 -0.00000663,0.00000342,0.00000213,0.00000179,0.00000726,0.00000274,0.0
 0000313,0.00000974,0.00000283,0.00000147,0.00000911\\\@


 MORNING PEOPLE ARE USUALLY ADMIRED AS EARLY BIRDS.
 RECALL BEN FRANKLIN'S APHORISM THAT THE EARLY BIRD GETS THE WORM.
 I IDENTIFY WITH THE WORM. --  CRAIG JAGGER, MINNEAPOLIS, KS.
 Job cpu time:       0 days  0 hours 13 minutes 19.3 seconds.
 File lengths (MBytes):  RWF=     75 Int=      0 D2E=      0 Chk=      4 Scr=      1
 Normal termination of Gaussian 09 at Sat Sep 20 23:27:42 2014.
