# Supplementary material for: CO from CO2and fluctuating renewable energy via formic-acid derivatives
Source: Royal Society of Chemistry journal article supplement (doi:10.1039/c6gc01202g), 2016-01-01
Supplement: c6gc01202g5.log [file c6gc01202g5.log]

 Entering Gaussian System, Link 0=/opt/mbfd/GAUSSIAN/LINUX64/g03.e01/g03
 Input=DIPA_geoopt.com
 Output=DIPA_geoopt.log
 Initial command:
 /opt/mbfd/GAUSSIAN/LINUX64/g03.e01/l1.exe /gaussianscratch/Gau-18480.inp -scrdir=/gaussianscratch/
 Entering Link 1 = /opt/mbfd/GAUSSIAN/LINUX64/g03.e01/l1.exe PID=     18484.
  
 Copyright (c) 1988,1990,1992,1993,1995,1998,2003,2004,2007, Gaussian, Inc.
                  All Rights Reserved.
  
 This is the Gaussian(R) 03 program.  It is based on the
 the Gaussian(R) 98 system (copyright 1998, Gaussian, Inc.),
 the Gaussian(R) 94 system (copyright 1995, Gaussian, Inc.),
 the Gaussian 92(TM) system (copyright 1992, Gaussian, Inc.),
 the Gaussian 90(TM) system (copyright 1990, Gaussian, Inc.),
 the Gaussian 88(TM) system (copyright 1988, Gaussian, Inc.),
 the Gaussian 86(TM) system (copyright 1986, Carnegie Mellon
 University), and the Gaussian 82(TM) system (copyright 1983,
 Carnegie Mellon University). Gaussian is a federally registered
 trademark of Gaussian, Inc.
  
 This software contains proprietary and confidential information,
 including trade secrets, belonging to Gaussian, Inc.
  
 This software is provided under written license and may be
 used, copied, transmitted, or stored only in accord with that
 written license.
  
 The following legend is applicable only to US Government
 contracts under FAR:
  
                    RESTRICTED RIGHTS LEGEND
  
 Use, reproduction and disclosure by the US Government is
 subject to restrictions as set forth in subparagraphs (a)
 and (c) of the Commercial Computer Software - Restricted
 Rights clause in FAR 52.227-19.
  
 Gaussian, Inc.
 340 Quinnipiac St., Bldg. 40, Wallingford CT 06492
  
  
 ---------------------------------------------------------------
 Warning -- This program may not be used in any manner that
 competes with the business of Gaussian, Inc. or will provide
 assistance to any competitor of Gaussian, Inc.  The licensee
 of this program is prohibited from giving any competitor of
 Gaussian, Inc. access to this program.  By using this program,
 the user acknowledges that Gaussian, Inc. is engaged in the
 business of creating and licensing software in the field of
 computational chemistry and represents and warrants to the
 licensee that it is not a competitor of Gaussian, Inc. and that
 it will not use this program in any manner prohibited above.
 ---------------------------------------------------------------
  

 Cite this work as:
 Gaussian 03, Revision E.01,
 M. J. Frisch, G. W. Trucks, H. B. Schlegel, G. E. Scuseria, 
 M. A. Robb, J. R. Cheeseman, J. A. Montgomery, Jr., T. Vreven, 
 K. N. Kudin, J. C. Burant, J. M. Millam, S. S. Iyengar, J. Tomasi, 
 V. Barone, B. Mennucci, M. Cossi, G. Scalmani, N. Rega, 
 G. A. Petersson, H. Nakatsuji, M. Hada, M. Ehara, K. Toyota, 
 R. Fukuda, J. Hasegawa, M. Ishida, T. Nakajima, Y. Honda, O. Kitao, 
 H. Nakai, M. Klene, X. Li, J. E. Knox, H. P. Hratchian, J. B. Cross, 
 V. Bakken, C. Adamo, J. Jaramillo, R. Gomperts, R. E. Stratmann, 
 O. Yazyev, A. J. Austin, R. Cammi, C. Pomelli, J. W. Ochterski, 
 P. Y. Ayala, K. Morokuma, G. A. Voth, P. Salvador, J. J. Dannenberg, 
 V. G. Zakrzewski, S. Dapprich, A. D. Daniels, M. C. Strain, 
 O. Farkas, D. K. Malick, A. D. Rabuck, K. Raghavachari, 
 J. B. Foresman, J. V. Ortiz, Q. Cui, A. G. Baboul, S. Clifford, 
 J. Cioslowski, B. B. Stefanov, G. Liu, A. Liashenko, P. Piskorz, 
 I. Komaromi, R. L. Martin, D. J. Fox, T. Keith, M. A. Al-Laham, 
 C. Y. Peng, A. Nanayakkara, M. Challacombe, P. M. W. Gill, 
 B. Johnson, W. Chen, M. W. Wong, C. Gonzalez, and J. A. Pople, 
 Gaussian, Inc., Wallingford CT, 2004.
 
 ******************************************
 Gaussian 03:  AM64L-G03RevE.01 11-Sep-2007
                 3-Nov-2014 
 ******************************************
 %chk=DIPF_geoopt.chk
 %mem=3000MB
 %nprocshared=3
 Will use up to    3 processors via shared memory.
 Default route: MaxDisk=200000000
 --------------------------------------------------
 # opt=(calcall,tight) b3lyp geom=connectivity tzvp
 --------------------------------------------------
 1/7=10,10=4,14=-1,18=20,26=3,38=1,57=2/1,3;
 2/9=110,17=6,18=5,40=1/2;
 3/5=19,7=101,11=2,16=1,25=1,30=1,74=-5/1,2,3;
 4//1;
 5/5=2,38=5/2;
 8/6=4,10=90,11=11/1;
 11/6=1,8=1,9=11,15=111,16=1/1,2,10;
 10/6=1/2;
 6/7=2,8=2,9=2,10=2,18=1,28=1/1;
 7/10=1,25=1/1,2,3,16;
 1/10=4,14=-1,18=20/3(3);
 2/9=110/2;
 7/8=1,9=1,25=1,44=-1/16;
 99//99;
 2/9=110/2;
 3/5=19,7=101,11=2,16=1,25=1,30=1,74=-5/1,2,3;
 4/5=5,16=3/1;
 5/5=2,38=5/2;
 8/6=4,10=90,11=11/1;
 11/6=1,8=1,9=11,15=111,16=1/1,2,10;
 10/6=1/2;
 7/10=1,25=1/1,2,3,16;
 1/10=4,14=-1,18=20/3(-8);
 2/9=110/2;
 6/7=2,8=2,9=2,10=2,18=1,19=2,28=1/1;
 7/8=1,9=1,25=1,44=-1/16;
 99//99;
 -------------------
 Title Card Required
 -------------------
 Symbolic Z-matrix:
 Charge =  0 Multiplicity = 1
 N                    -0.06453  -0.18123   0.07147 
 C                     0.64522   0.89087  -0.62901 
 H                    -0.09224   1.49784  -1.15822 
 C                     1.48577   1.76087   0.30564 
 H                     1.97445   2.55801  -0.25926 
 H                     0.87277   2.22706   1.0803 
 H                     2.25885   1.16318   0.78952 
 C                    -1.38322   0.08305   0.6392 
 H                    -1.3523    1.04309   1.16231 
 C                    -2.51312   0.07951  -0.39069 
 H                    -2.59083  -0.89461  -0.87688 
 H                    -3.46704   0.29761   0.09506 
 H                    -2.35521   0.83231  -1.16514 
 C                     1.55107   0.22648  -1.6824 
 H                     1.76647   0.92803  -2.46107 
 H                     2.46457  -0.08604  -1.22116 
 H                     1.05155  -0.62417  -2.09687 
 C                    -1.65452  -0.98889   1.71108 
 H                    -2.53903  -0.73262   2.25592 
 H                    -1.78942  -1.93947   1.23874 
 H                    -0.82359  -1.03937   2.38333 
 H                     0.33362  -0.99417   0.16482 
 

 GradGradGradGradGradGradGradGradGradGradGradGradGradGradGradGradGradGrad
 Berny optimization.
 Initialization pass.
                           ----------------------------
                           !    Initial Parameters    !
                           ! (Angstroms and Degrees)  !
 --------------------------                            --------------------------
 ! Name  Definition              Value          Derivative Info.                !
 --------------------------------------------------------------------------------
 ! R1    R(1,2)                  1.4642         calculate D2E/DX2 analytically  !
 ! R2    R(1,8)                  1.4598         calculate D2E/DX2 analytically  !
 ! R3    R(1,22)                 0.91           calculate D2E/DX2 analytically  !
 ! R4    R(2,3)                  1.0919         calculate D2E/DX2 analytically  !
 ! R5    R(2,4)                  1.5287         calculate D2E/DX2 analytically  !
 ! R6    R(2,14)                 1.54           calculate D2E/DX2 analytically  !
 ! R7    R(4,5)                  1.0924         calculate D2E/DX2 analytically  !
 ! R8    R(4,6)                  1.0923         calculate D2E/DX2 analytically  !
 ! R9    R(4,7)                  1.0904         calculate D2E/DX2 analytically  !
 ! R10   R(8,9)                  1.0937         calculate D2E/DX2 analytically  !
 ! R11   R(8,10)                 1.5288         calculate D2E/DX2 analytically  !
 ! R12   R(8,18)                 1.54           calculate D2E/DX2 analytically  !
 ! R13   R(10,11)                1.0915         calculate D2E/DX2 analytically  !
 ! R14   R(10,12)                1.0925         calculate D2E/DX2 analytically  !
 ! R15   R(10,13)                1.0915         calculate D2E/DX2 analytically  !
 ! R16   R(14,15)                1.07           calculate D2E/DX2 analytically  !
 ! R17   R(14,16)                1.07           calculate D2E/DX2 analytically  !
 ! R18   R(14,17)                1.07           calculate D2E/DX2 analytically  !
 ! R19   R(18,19)                1.07           calculate D2E/DX2 analytically  !
 ! R20   R(18,20)                1.07           calculate D2E/DX2 analytically  !
 ! R21   R(18,21)                1.07           calculate D2E/DX2 analytically  !
 ! A1    A(2,1,8)              119.4307         calculate D2E/DX2 analytically  !
 ! A2    A(2,1,22)             119.4135         calculate D2E/DX2 analytically  !
 ! A3    A(8,1,22)             121.135          calculate D2E/DX2 analytically  !
 ! A4    A(1,2,3)              108.15           calculate D2E/DX2 analytically  !
 ! A5    A(1,2,4)              113.0004         calculate D2E/DX2 analytically  !
 ! A6    A(1,2,14)             107.2465         calculate D2E/DX2 analytically  !
 ! A7    A(3,2,4)              110.5677         calculate D2E/DX2 analytically  !
 ! A8    A(3,2,14)             107.7919         calculate D2E/DX2 analytically  !
 ! A9    A(4,2,14)             109.8952         calculate D2E/DX2 analytically  !
 ! A10   A(2,4,5)              110.1871         calculate D2E/DX2 analytically  !
 ! A11   A(2,4,6)              111.5867         calculate D2E/DX2 analytically  !
 ! A12   A(2,4,7)              110.4375         calculate D2E/DX2 analytically  !
 ! A13   A(5,4,6)              107.839          calculate D2E/DX2 analytically  !
 ! A14   A(5,4,7)              108.1972         calculate D2E/DX2 analytically  !
 ! A15   A(6,4,7)              108.4872         calculate D2E/DX2 analytically  !
 ! A16   A(1,8,9)              108.6243         calculate D2E/DX2 analytically  !
 ! A17   A(1,8,10)             113.9043         calculate D2E/DX2 analytically  !
 ! A18   A(1,8,18)             107.6861         calculate D2E/DX2 analytically  !
 ! A19   A(9,8,10)             110.189          calculate D2E/DX2 analytically  !
 ! A20   A(9,8,18)             106.443          calculate D2E/DX2 analytically  !
 ! A21   A(10,8,18)            109.6981         calculate D2E/DX2 analytically  !
 ! A22   A(8,10,11)            110.7783         calculate D2E/DX2 analytically  !
 ! A23   A(8,10,12)            110.2025         calculate D2E/DX2 analytically  !
 ! A24   A(8,10,13)            111.6809         calculate D2E/DX2 analytically  !
 ! A25   A(11,10,12)           108.3046         calculate D2E/DX2 analytically  !
 ! A26   A(11,10,13)           108.0459         calculate D2E/DX2 analytically  !
 ! A27   A(12,10,13)           107.7047         calculate D2E/DX2 analytically  !
 ! A28   A(2,14,15)            109.4712         calculate D2E/DX2 analytically  !
 ! A29   A(2,14,16)            109.4712         calculate D2E/DX2 analytically  !
 ! A30   A(2,14,17)            109.4712         calculate D2E/DX2 analytically  !
 ! A31   A(15,14,16)           109.4713         calculate D2E/DX2 analytically  !
 ! A32   A(15,14,17)           109.4712         calculate D2E/DX2 analytically  !
 ! A33   A(16,14,17)           109.4712         calculate D2E/DX2 analytically  !
 ! A34   A(8,18,19)            109.4712         calculate D2E/DX2 analytically  !
 ! A35   A(8,18,20)            109.4712         calculate D2E/DX2 analytically  !
 ! A36   A(8,18,21)            109.4712         calculate D2E/DX2 analytically  !
 ! A37   A(19,18,20)           109.4713         calculate D2E/DX2 analytically  !
 ! A38   A(19,18,21)           109.4712         calculate D2E/DX2 analytically  !
 ! A39   A(20,18,21)           109.4712         calculate D2E/DX2 analytically  !
 ! D1    D(8,1,2,3)            -35.319          calculate D2E/DX2 analytically  !
 ! D2    D(8,1,2,4)             87.4184         calculate D2E/DX2 analytically  !
 ! D3    D(8,1,2,14)          -151.325          calculate D2E/DX2 analytically  !
 ! D4    D(22,1,2,3)           146.3174         calculate D2E/DX2 analytically  !
 ! D5    D(22,1,2,4)           -90.9452         calculate D2E/DX2 analytically  !
 ! D6    D(22,1,2,14)           30.3113         calculate D2E/DX2 analytically  !
 ! D7    D(2,1,8,9)            -44.9096         calculate D2E/DX2 analytically  !
 ! D8    D(2,1,8,10)            78.302          calculate D2E/DX2 analytically  !
 ! D9    D(2,1,8,18)          -159.8065         calculate D2E/DX2 analytically  !
 ! D10   D(22,1,8,9)           133.425          calculate D2E/DX2 analytically  !
 ! D11   D(22,1,8,10)         -103.3634         calculate D2E/DX2 analytically  !
 ! D12   D(22,1,8,18)           18.5282         calculate D2E/DX2 analytically  !
 ! D13   D(1,2,4,5)           -178.6327         calculate D2E/DX2 analytically  !
 ! D14   D(1,2,4,6)            -58.865          calculate D2E/DX2 analytically  !
 ! D15   D(1,2,4,7)             61.8893         calculate D2E/DX2 analytically  !
 ! D16   D(3,2,4,5)            -57.2517         calculate D2E/DX2 analytically  !
 ! D17   D(3,2,4,6)             62.5161         calculate D2E/DX2 analytically  !
 ! D18   D(3,2,4,7)           -176.7297         calculate D2E/DX2 analytically  !
 ! D19   D(14,2,4,5)            61.6216         calculate D2E/DX2 analytically  !
 ! D20   D(14,2,4,6)          -178.6107         calculate D2E/DX2 analytically  !
 ! D21   D(14,2,4,7)           -57.8564         calculate D2E/DX2 analytically  !
 ! D22   D(1,2,14,15)          156.7018         calculate D2E/DX2 analytically  !
 ! D23   D(1,2,14,16)          -83.2982         calculate D2E/DX2 analytically  !
 ! D24   D(1,2,14,17)           36.7018         calculate D2E/DX2 analytically  !
 ! D25   D(3,2,14,15)           40.4589         calculate D2E/DX2 analytically  !
 ! D26   D(3,2,14,16)          160.459          calculate D2E/DX2 analytically  !
 ! D27   D(3,2,14,17)          -79.5411         calculate D2E/DX2 analytically  !
 ! D28   D(4,2,14,15)          -80.106          calculate D2E/DX2 analytically  !
 ! D29   D(4,2,14,16)           39.894          calculate D2E/DX2 analytically  !
 ! D30   D(4,2,14,17)          159.894          calculate D2E/DX2 analytically  !
 ! D31   D(1,8,10,11)           61.0124         calculate D2E/DX2 analytically  !
 ! D32   D(1,8,10,12)         -179.1489         calculate D2E/DX2 analytically  !
 ! D33   D(1,8,10,13)          -59.4784         calculate D2E/DX2 analytically  !
 ! D34   D(9,8,10,11)         -176.6319         calculate D2E/DX2 analytically  !
 ! D35   D(9,8,10,12)          -56.7932         calculate D2E/DX2 analytically  !
 ! D36   D(9,8,10,13)           62.8772         calculate D2E/DX2 analytically  !
 ! D37   D(18,8,10,11)         -59.7609         calculate D2E/DX2 analytically  !
 ! D38   D(18,8,10,12)          60.0778         calculate D2E/DX2 analytically  !
 ! D39   D(18,8,10,13)         179.7482         calculate D2E/DX2 analytically  !
 ! D40   D(1,8,18,19)          170.8621         calculate D2E/DX2 analytically  !
 ! D41   D(1,8,18,20)          -69.1378         calculate D2E/DX2 analytically  !
 ! D42   D(1,8,18,21)           50.8621         calculate D2E/DX2 analytically  !
 ! D43   D(9,8,18,19)           54.5278         calculate D2E/DX2 analytically  !
 ! D44   D(9,8,18,20)          174.5278         calculate D2E/DX2 analytically  !
 ! D45   D(9,8,18,21)          -65.4722         calculate D2E/DX2 analytically  !
 ! D46   D(10,8,18,19)         -64.6724         calculate D2E/DX2 analytically  !
 ! D47   D(10,8,18,20)          55.3276         calculate D2E/DX2 analytically  !
 ! D48   D(10,8,18,21)         175.3276         calculate D2E/DX2 analytically  !
 --------------------------------------------------------------------------------
 Trust Radius=3.00D-01 FncErr=1.00D-07 GrdErr=1.00D-06
 Number of steps in this run= 118 maximum allowed number of steps= 132.
 GradGradGradGradGradGradGradGradGradGradGradGradGradGradGradGradGradGrad

                          Input orientation:                          
 ---------------------------------------------------------------------
 Center     Atomic     Atomic              Coordinates (Angstroms)
 Number     Number      Type              X           Y           Z
 ---------------------------------------------------------------------
    1          7             0       -0.064526   -0.181229    0.071473
    2          6             0        0.645215    0.890866   -0.629011
    3          1             0       -0.092243    1.497835   -1.158223
    4          6             0        1.485771    1.760871    0.305641
    5          1             0        1.974448    2.558007   -0.259255
    6          1             0        0.872774    2.227056    1.080304
    7          1             0        2.258854    1.163180    0.789516
    8          6             0       -1.383224    0.083052    0.639195
    9          1             0       -1.352298    1.043089    1.162307
   10          6             0       -2.513121    0.079507   -0.390691
   11          1             0       -2.590830   -0.894607   -0.876876
   12          1             0       -3.467044    0.297611    0.095064
   13          1             0       -2.355209    0.832312   -1.165143
   14          6             0        1.551067    0.226480   -1.682398
   15          1             0        1.766471    0.928031   -2.461069
   16          1             0        2.464568   -0.086043   -1.221156
   17          1             0        1.051551   -0.624165   -2.096868
   18          6             0       -1.654516   -0.988891    1.711081
   19          1             0       -2.539034   -0.732621    2.255924
   20          1             0       -1.789416   -1.939468    1.238741
   21          1             0       -0.823593   -1.039374    2.383330
   22          1             0        0.333618   -0.994167    0.164816
 ---------------------------------------------------------------------
                    Distance matrix (angstroms):
                    1          2          3          4          5
     1  N    0.000000
     2  C    1.464171   0.000000
     3  H    2.081388   1.091935   0.000000
     4  C    2.495998   1.528731   2.168459   0.000000
     5  H    3.430774   2.164010   2.490646   1.092400   0.000000
     6  H    2.774186   2.181501   2.544410   1.092335   1.765682
     7  H    2.778690   2.165688   3.071374   1.090425   1.768149
     8  C    1.459835   2.524970   2.626586   3.340280   4.266916
     9  H    2.085001   2.687387   2.679439   3.050201   3.922124
    10  C    2.505433   3.269585   2.908850   4.393518   5.128208
    11  H    2.791144   3.704232   3.470716   5.006854   5.757062
    12  H    3.436128   4.217453   3.794805   5.168738   5.902946
    13  H    2.793513   3.048510   2.358810   4.216462   4.748114
    14  C    2.419180   1.540000   2.142795   2.512154   2.764164
    15  H    3.316139   2.148263   2.340278   2.902946   2.747373
    16  H    2.841878   2.148263   3.008307   2.588483   2.855953
    17  H    2.478613   2.148263   2.586930   3.413063   3.788771
    18  C    2.422540   3.781306   4.105777   4.404299   5.443536
    19  H    3.346498   4.593256   4.755851   5.120563   6.125837
    20  H    2.725649   4.174531   4.521159   5.028919   6.052928
    21  H    2.580170   3.867483   4.417567   4.182263   5.268153
    22  H    0.910000   2.068962   2.853395   2.989569   3.935746
                    6          7          8          9         10
     6  H    0.000000
     7  H    1.771329   0.000000
     8  C    3.143383   3.801842   0.000000
     9  H    2.521795   3.632329   1.093743   0.000000
    10  C    4.270840   5.033784   1.528838   2.165134   0.000000
    11  H    5.056865   5.525467   2.170853   3.073580   1.091473
    12  H    4.850513   5.832442   2.164352   2.483324   1.092473
    13  H    4.172196   5.021926   2.182151   2.543085   1.091525
    14  C    3.477773   2.736554   3.744386   4.145929   4.267052
    15  H    3.876530   3.296064   4.499578   4.782135   4.829220
    16  H    3.630558   2.376063   4.277266   4.639429   5.049205
    17  H    4.272686   3.603248   3.730191   4.379549   4.014110
    18  C    4.138525   4.560170   1.540000   2.126365   2.509207
    19  H    4.667141   5.363221   2.148263   2.399476   2.768537
    20  H    4.946946   5.120226   2.148263   3.015387   2.693521
    21  H    3.904498   4.110105   2.148263   2.471250   3.435345
    22  H    3.391915   2.958197   2.081582   2.826255   3.092780
                   11         12         13         14         15
    11  H    0.000000
    12  H    1.770255   0.000000
    13  H    1.766597   1.763577   0.000000
    14  C    4.365892   5.324084   3.986675   0.000000
    15  H    4.981742   5.858407   4.321670   1.070000   0.000000
    16  H    5.131214   6.087992   4.906808   1.070000   1.747303
    17  H    3.850774   5.106069   3.820399   1.070000   1.747303
    18  C    2.753742   2.748064   3.475689   4.823752   5.725782
    19  H    3.137413   2.567469   3.766498   5.758401   6.598876
    20  H    2.491954   3.021085   3.712350   4.937935   5.878390
    21  H    3.711203   3.743197   4.294266   4.875607   5.835008
    22  H    3.106032   4.014796   3.512066   2.526729   3.555725
                   16         17         18         19         20
    16  H    0.000000
    17  H    1.747303   0.000000
    18  C    5.136147   4.685755   0.000000
    19  H    6.127331   5.643657   1.070000   0.000000
    20  H    5.251919   4.574647   1.070000   1.747303   0.000000
    21  H    4.971234   4.874499   1.070000   1.747303   1.747303
    22  H    2.699362   2.401571   2.518659   3.562762   2.560114
                   21         22
    21  H    0.000000
    22  H    2.502596   0.000000
 Stoichiometry    C6H15N
 Framework group  C1[X(C6H15N)]
 Deg. of freedom    60
 Full point group                 C1
 Largest Abelian subgroup         C1      NOp   1
 Largest concise Abelian subgroup C1      NOp   1
                         Standard orientation:                         
 ---------------------------------------------------------------------
 Center     Atomic     Atomic              Coordinates (Angstroms)
 Number     Number      Type              X           Y           Z
 ---------------------------------------------------------------------
    1          7             0        0.001393   -0.062835    0.492774
    2          6             0       -1.248750    0.153016   -0.238217
    3          1             0       -1.035828    0.797958   -1.093223
    4          6             0       -1.904402   -1.149224   -0.697902
    5          1             0       -2.817747   -0.934423   -1.257366
    6          1             0       -1.241686   -1.725321   -1.347607
    7          1             0       -2.168581   -1.766492    0.161293
    8          6             0        1.255927   -0.166354   -0.246514
    9          1             0        1.099916   -0.819981   -1.109477
   10          6             0        1.820841    1.180060   -0.699712
   11          1             0        2.036025    1.818486    0.159020
   12          1             0        2.748207    1.031517   -1.257764
   13          1             0        1.123647    1.711597   -1.349955
   14          6             0       -2.201042    0.916081    0.701183
   15          1             0       -2.931158    1.439882    0.120268
   16          1             0       -2.692801    0.222473    1.350785
   17          1             0       -1.640823    1.616068    1.285197
   18          6             0        2.276300   -0.878458    0.660870
   19          1             0        3.154177   -1.112225    0.095551
   20          1             0        2.537511   -0.236620    1.476169
   21          1             0        1.846174   -1.781303    1.041345
   22          1             0       -0.020028   -0.152497    1.398092
 ---------------------------------------------------------------------
 Rotational constants (GHZ):      4.0966884      1.4221636      1.3055305
 Standard basis: TZVP (5D, 7F)
 There are   223 symmetry adapted basis functions of A   symmetry.
 Integral buffers will be    131072 words long.
 Raffenetti 2 integral format.
 Two-electron integral symmetry is turned on.
   223 basis functions,   365 primitive gaussians,   230 cartesian basis functions
    29 alpha electrons       29 beta electrons
       nuclear repulsion energy       334.6207630831 Hartrees.
 NAtoms=   22 NActive=   22 NUniq=   22 SFac= 7.50D-01 NAtFMM=   80 NAOKFM=F Big=F
 One-electron integrals computed using PRISM.
 NBasis=   223 RedAO= T  NBF=   223
 NBsUse=   223 1.00D-06 NBFU=   223
 Harris functional with IExCor=  402 diagonalized for initial guess.
 ExpMin= 9.52D-02 ExpMax= 1.97D+04 ExpMxC= 6.73D+02 IAcc=2 IRadAn=         4 AccDes= 0.00D+00
 HarFok:  IExCor= 402 AccDes= 0.00D+00 IRadAn=         4 IDoV=1
 ScaDFX=  1.000000  1.000000  1.000000  1.000000
 Initial guess orbital symmetries:
       Occupied  (A) (A) (A) (A) (A) (A) (A) (A) (A) (A) (A) (A)
                 (A) (A) (A) (A) (A) (A) (A) (A) (A) (A) (A) (A)
                 (A) (A) (A) (A) (A)
       Virtual   (A) (A) (A) (A) (A) (A) (A) (A) (A) (A) (A) (A)
                 (A) (A) (A) (A) (A) (A) (A) (A) (A) (A) (A) (A)
                 (A) (A) (A) (A) (A) (A) (A) (A) (A) (A) (A) (A)
                 (A) (A) (A) (A) (A) (A) (A) (A) (A) (A) (A) (A)
                 (A) (A) (A) (A) (A) (A) (A) (A) (A) (A) (A) (A)
                 (A) (A) (A) (A) (A) (A) (A) (A) (A) (A) (A) (A)
                 (A) (A) (A) (A) (A) (A) (A) (A) (A) (A) (A) (A)
                 (A) (A) (A) (A) (A) (A) (A) (A) (A) (A) (A) (A)
                 (A) (A) (A) (A) (A) (A) (A) (A) (A) (A) (A) (A)
                 (A) (A) (A) (A) (A) (A) (A) (A) (A) (A) (A) (A)
                 (A) (A) (A) (A) (A) (A) (A) (A) (A) (A) (A) (A)
                 (A) (A) (A) (A) (A) (A) (A) (A) (A) (A) (A) (A)
                 (A) (A) (A) (A) (A) (A) (A) (A) (A) (A) (A) (A)
                 (A) (A) (A) (A) (A) (A) (A) (A) (A) (A) (A) (A)
                 (A) (A) (A) (A) (A) (A) (A) (A) (A) (A) (A) (A)
                 (A) (A) (A) (A) (A) (A) (A) (A) (A) (A) (A) (A)
                 (A) (A)
 The electronic state of the initial guess is 1-A.
 Requested convergence on RMS density matrix=1.00D-08 within 128 cycles.
 Requested convergence on MAX density matrix=1.00D-06.
 Requested convergence on             energy=1.00D-06.
 No special actions if energy rises.
 Keep R1 integrals in memory in canonical form, NReq=   360236806.
 Integral accuracy reduced to 1.0D-05 until final iterations.
 Initial convergence to 1.0D-05 achieved.  Increase integral accuracy.
 SCF Done:  E(RB+HF-LYP) =  -292.511152330     A.U. after   13 cycles
             Convg  =    0.3821D-08             -V/T =  2.0043
             S**2   =   0.0000
 Range of M.O.s used for correlation:     1   223
 NBasis=   223 NAE=    29 NBE=    29 NFC=     0 NFV=     0
 NROrb=    223 NOA=    29 NOB=    29 NVA=   194 NVB=   194

 **** Warning!!: The largest alpha MO coefficient is  0.15990042D+02

 Symmetrizing basis deriv contribution to polar:
 IMax=3 JMax=2 DiffMx= 0.00D+00
 G2DrvN: will do   23 centers at a time, making    1 passes doing MaxLOS=2.
 FoFDir/FoFCou used for L=0 through L=2.
 DoAtom=TTTTTTTTTTTTTTTTTTTTTT
          Differentiating once with respect to electric field.
                with respect to dipole field.
          Differentiating once with respect to nuclear coordinates.
          Store integrals in memory, NReq=   353689553.
          There are  69 degrees of freedom in the 1st order CPHF.
    66 vectors were produced by pass  0.
 AX will form  66 AO Fock derivatives at one time.
    66 vectors were produced by pass  1.
    66 vectors were produced by pass  2.
    66 vectors were produced by pass  3.
    66 vectors were produced by pass  4.
    32 vectors were produced by pass  5.
     3 vectors were produced by pass  6.
 Inv2:  IOpt= 1 Iter= 1 AM= 3.36D-15 Conv= 1.00D-12.
 Inverted reduced A of dimension  365 with in-core refinement.
 Isotropic polarizability for W=    0.000000       82.01 Bohr**3.
 End of Minotr Frequency-dependent properties file   721 does not exist.

 **********************************************************************

            Population analysis using the SCF density.

 **********************************************************************

 Orbital symmetries:
       Occupied  (A) (A) (A) (A) (A) (A) (A) (A) (A) (A) (A) (A)
                 (A) (A) (A) (A) (A) (A) (A) (A) (A) (A) (A) (A)
                 (A) (A) (A) (A) (A)
       Virtual   (A) (A) (A) (A) (A) (A) (A) (A) (A) (A) (A) (A)
                 (A) (A) (A) (A) (A) (A) (A) (A) (A) (A) (A) (A)
                 (A) (A) (A) (A) (A) (A) (A) (A) (A) (A) (A) (A)
                 (A) (A) (A) (A) (A) (A) (A) (A) (A) (A) (A) (A)
                 (A) (A) (A) (A) (A) (A) (A) (A) (A) (A) (A) (A)
                 (A) (A) (A) (A) (A) (A) (A) (A) (A) (A) (A) (A)
                 (A) (A) (A) (A) (A) (A) (A) (A) (A) (A) (A) (A)
                 (A) (A) (A) (A) (A) (A) (A) (A) (A) (A) (A) (A)
                 (A) (A) (A) (A) (A) (A) (A) (A) (A) (A) (A) (A)
                 (A) (A) (A) (A) (A) (A) (A) (A) (A) (A) (A) (A)
                 (A) (A) (A) (A) (A) (A) (A) (A) (A) (A) (A) (A)
                 (A) (A) (A) (A) (A) (A) (A) (A) (A) (A) (A) (A)
                 (A) (A) (A) (A) (A) (A) (A) (A) (A) (A) (A) (A)
                 (A) (A) (A) (A) (A) (A) (A) (A) (A) (A) (A) (A)
                 (A) (A) (A) (A) (A) (A) (A) (A) (A) (A) (A) (A)
                 (A) (A) (A) (A) (A) (A) (A) (A) (A) (A) (A) (A)
                 (A) (A)
 The electronic state is 1-A.
 Alpha  occ. eigenvalues --  -14.27118 -10.19667 -10.19614 -10.15140 -10.15126
 Alpha  occ. eigenvalues --  -10.15018 -10.14856  -0.90402  -0.78854  -0.73329
 Alpha  occ. eigenvalues --   -0.68593  -0.68527  -0.59222  -0.58790  -0.48586
 Alpha  occ. eigenvalues --   -0.46817  -0.44834  -0.44277  -0.41119  -0.40391
 Alpha  occ. eigenvalues --   -0.39266  -0.38741  -0.38053  -0.35448  -0.35285
 Alpha  occ. eigenvalues --   -0.34212  -0.33165  -0.32430  -0.20066
 Alpha virt. eigenvalues --    0.03107   0.05579   0.06232   0.06751   0.09641
 Alpha virt. eigenvalues --    0.09773   0.10074   0.10517   0.10778   0.12033
 Alpha virt. eigenvalues --    0.13207   0.13405   0.14525   0.15212   0.15895
 Alpha virt. eigenvalues --    0.16265   0.17323   0.17998   0.18474   0.19587
 Alpha virt. eigenvalues --    0.20411   0.20695   0.23484   0.25362   0.26762
 Alpha virt. eigenvalues --    0.28547   0.29740   0.31140   0.31295   0.32729
 Alpha virt. eigenvalues --    0.33150   0.34758   0.36627   0.38258   0.38665
 Alpha virt. eigenvalues --    0.40380   0.42282   0.42734   0.42960   0.44335
 Alpha virt. eigenvalues --    0.44527   0.45596   0.45862   0.46724   0.47495
 Alpha virt. eigenvalues --    0.47768   0.48717   0.48907   0.49726   0.51042
 Alpha virt. eigenvalues --    0.51519   0.52777   0.53133   0.54890   0.56988
 Alpha virt. eigenvalues --    0.59089   0.61253   0.63367   0.63771   0.65992
 Alpha virt. eigenvalues --    0.66740   0.69080   0.74811   0.75894   1.11738
 Alpha virt. eigenvalues --    1.14169   1.20566   1.24887   1.25420   1.27013
 Alpha virt. eigenvalues --    1.27811   1.28637   1.28752   1.29140   1.31100
 Alpha virt. eigenvalues --    1.32386   1.33877   1.35117   1.35600   1.36392
 Alpha virt. eigenvalues --    1.37156   1.39202   1.39569   1.42271   1.43100
 Alpha virt. eigenvalues --    1.45796   1.47012   1.48591   1.50136   1.50862
 Alpha virt. eigenvalues --    1.53837   1.55209   1.55314   1.56801   1.58372
 Alpha virt. eigenvalues --    1.59053   1.61020   1.62352   1.65424   1.65721
 Alpha virt. eigenvalues --    1.67302   1.68114   1.70670   1.73175   1.76337
 Alpha virt. eigenvalues --    1.79341   1.79952   1.81157   1.81489   1.81536
 Alpha virt. eigenvalues --    1.82080   1.82291   1.83005   1.85191   1.86170
 Alpha virt. eigenvalues --    1.87870   1.89106   1.89960   1.93310   1.98290
 Alpha virt. eigenvalues --    1.99271   2.01454   2.02680   2.08296   2.13476
 Alpha virt. eigenvalues --    2.16551   2.17146   2.20607   2.21752   2.24024
 Alpha virt. eigenvalues --    2.26348   2.29095   2.30038   2.30583   2.33053
 Alpha virt. eigenvalues --    2.34339   2.35423   2.36569   2.40421   2.42409
 Alpha virt. eigenvalues --    2.45434   2.46673   2.48932   2.50867   2.52354
 Alpha virt. eigenvalues --    2.54206   2.55558   2.56758   2.61379   2.63054
 Alpha virt. eigenvalues --    2.63910   2.65860   2.67170   2.68396   2.69210
 Alpha virt. eigenvalues --    2.69662   2.71511   2.72419   2.72861   2.74433
 Alpha virt. eigenvalues --    2.75475   2.81889   2.84142   2.85339   2.87915
 Alpha virt. eigenvalues --    2.89987   2.93845   2.99656   3.10265   3.13950
 Alpha virt. eigenvalues --    3.17152   3.19085   3.30560   3.32895   3.34690
 Alpha virt. eigenvalues --    3.35330   3.36237   3.38127   3.39217   3.40184
 Alpha virt. eigenvalues --    3.42396   3.44790   3.44981   3.45971   3.62869
 Alpha virt. eigenvalues --    3.81132   4.07274  22.00758  22.04021  22.06021
 Alpha virt. eigenvalues --   22.11415  22.12209  22.14839  32.03326
          Condensed to atoms (all electrons):
              1          2          3          4          5          6
     1  N    6.905494   0.243167  -0.069212  -0.114530   0.015139   0.000201
     2  C    0.243167   5.145552   0.468840   0.229153  -0.042886  -0.033524
     3  H   -0.069212   0.468840   0.626183  -0.095884   0.004638  -0.001524
     4  C   -0.114530   0.229153  -0.095884   5.237895   0.366994   0.383099
     5  H    0.015139  -0.042886   0.004638   0.366994   0.609940  -0.025667
     6  H    0.000201  -0.033524  -0.001524   0.383099  -0.025667   0.576086
     7  H    0.007041  -0.017884   0.011493   0.372329  -0.024070  -0.021875
     8  C    0.268033  -0.035065   0.000378  -0.013031   0.001661  -0.001106
     9  H   -0.077619   0.001682  -0.008013   0.012552  -0.001715   0.000099
    10  C   -0.113777  -0.020517   0.010914  -0.006699   0.000553   0.000952
    11  H    0.011351  -0.001706  -0.001354   0.000558  -0.000033  -0.000048
    12  H    0.013539   0.002192  -0.001666   0.000443  -0.000030  -0.000058
    13  H   -0.000828  -0.001507   0.001486   0.001097  -0.000064  -0.000080
    14  C   -0.076009   0.256121  -0.061696  -0.084258  -0.005965   0.015331
    15  H    0.010207  -0.045817  -0.007821   0.006714  -0.000561  -0.000659
    16  H   -0.007443  -0.024245   0.009720  -0.016689   0.000263   0.000179
    17  H    0.022350  -0.080226  -0.007491   0.022594  -0.001118  -0.000772
    18  C   -0.075260   0.009953   0.002046  -0.000436   0.000025  -0.000765
    19  H    0.009902  -0.000796   0.000049  -0.000030   0.000001   0.000081
    20  H   -0.006728  -0.000455  -0.000196   0.000316  -0.000011  -0.000039
    21  H    0.015887  -0.000818   0.000363  -0.001572   0.000081   0.000272
    22  H    0.406761  -0.039325   0.006329   0.000740  -0.000207  -0.000323
              7          8          9         10         11         12
     1  N    0.007041   0.268033  -0.077619  -0.113777   0.011351   0.013539
     2  C   -0.017884  -0.035065   0.001682  -0.020517  -0.001706   0.002192
     3  H    0.011493   0.000378  -0.008013   0.010914  -0.001354  -0.001666
     4  C    0.372329  -0.013031   0.012552  -0.006699   0.000558   0.000443
     5  H   -0.024070   0.001661  -0.001715   0.000553  -0.000033  -0.000030
     6  H   -0.021875  -0.001106   0.000099   0.000952  -0.000048  -0.000058
     7  H    0.588930  -0.001052  -0.001293   0.000481  -0.000031  -0.000023
     8  C   -0.001052   5.115890   0.470561   0.217027  -0.019950  -0.036119
     9  H   -0.001293   0.470561   0.651585  -0.113053   0.012623   0.006701
    10  C    0.000481   0.217027  -0.113053   5.267743   0.364052   0.367792
    11  H   -0.000031  -0.019950   0.012623   0.364052   0.591596  -0.022754
    12  H   -0.000023  -0.036119   0.006701   0.367792  -0.022754   0.603465
    13  H   -0.000050  -0.031780  -0.001974   0.381669  -0.023153  -0.025081
    14  C   -0.019853   0.008708   0.001161   0.002030  -0.000134  -0.000065
    15  H    0.000105  -0.000738   0.000101  -0.000125   0.000030   0.000006
    16  H    0.007930  -0.000648  -0.000018  -0.000006   0.000005  -0.000002
    17  H   -0.001262   0.000428   0.000568  -0.002951   0.000937   0.000134
    18  C    0.000122   0.262336  -0.061649  -0.071746  -0.017493  -0.012931
    19  H    0.000008  -0.045942  -0.006531   0.005779  -0.000198   0.000855
    20  H   -0.000043  -0.020425   0.012294  -0.026699   0.009530   0.002322
    21  H    0.000525  -0.071221  -0.011030   0.023041  -0.001191  -0.000987
    22  H    0.002260  -0.041344   0.005248   0.003717   0.001329  -0.000330
             13         14         15         16         17         18
     1  N   -0.000828  -0.076009   0.010207  -0.007443   0.022350  -0.075260
     2  C   -0.001507   0.256121  -0.045817  -0.024245  -0.080226   0.009953
     3  H    0.001486  -0.061696  -0.007821   0.009720  -0.007491   0.002046
     4  C    0.001097  -0.084258   0.006714  -0.016689   0.022594  -0.000436
     5  H   -0.000064  -0.005965  -0.000561   0.000263  -0.001118   0.000025
     6  H   -0.000080   0.015331  -0.000659   0.000179  -0.000772  -0.000765
     7  H   -0.000050  -0.019853   0.000105   0.007930  -0.001262   0.000122
     8  C   -0.031780   0.008708  -0.000738  -0.000648   0.000428   0.262336
     9  H   -0.001974   0.001161   0.000101  -0.000018   0.000568  -0.061649
    10  C    0.381669   0.002030  -0.000125  -0.000006  -0.002951  -0.071746
    11  H   -0.023153  -0.000134   0.000030   0.000005   0.000937  -0.017493
    12  H   -0.025081  -0.000065   0.000006  -0.000002   0.000134  -0.012931
    13  H    0.577889  -0.001110   0.000148  -0.000015   0.000310   0.015759
    14  C   -0.001110   5.150660   0.400702   0.394892   0.415177  -0.001792
    15  H    0.000148   0.400702   0.557990  -0.024665  -0.016897   0.000042
    16  H   -0.000015   0.394892  -0.024665   0.572959  -0.031857   0.000124
    17  H    0.000310   0.415177  -0.016897  -0.031857   0.554294  -0.000316
    18  C    0.015759  -0.001792   0.000042   0.000124  -0.000316   5.126896
    19  H   -0.000514   0.000072  -0.000003  -0.000001  -0.000008   0.402531
    20  H   -0.000001   0.000029   0.000003  -0.000001   0.000186   0.396853
    21  H   -0.000755   0.000030  -0.000008   0.000014  -0.000157   0.415581
    22  H   -0.000429  -0.006602   0.000498   0.002844  -0.000014  -0.007835
             19         20         21         22
     1  N    0.009902  -0.006728   0.015887   0.406761
     2  C   -0.000796  -0.000455  -0.000818  -0.039325
     3  H    0.000049  -0.000196   0.000363   0.006329
     4  C   -0.000030   0.000316  -0.001572   0.000740
     5  H    0.000001  -0.000011   0.000081  -0.000207
     6  H    0.000081  -0.000039   0.000272  -0.000323
     7  H    0.000008  -0.000043   0.000525   0.002260
     8  C   -0.045942  -0.020425  -0.071221  -0.041344
     9  H   -0.006531   0.012294  -0.011030   0.005248
    10  C    0.005779  -0.026699   0.023041   0.003717
    11  H   -0.000198   0.009530  -0.001191   0.001329
    12  H    0.000855   0.002322  -0.000987  -0.000330
    13  H   -0.000514  -0.000001  -0.000755  -0.000429
    14  C    0.000072   0.000029   0.000030  -0.006602
    15  H   -0.000003   0.000003  -0.000008   0.000498
    16  H   -0.000001  -0.000001   0.000014   0.002844
    17  H   -0.000008   0.000186  -0.000157  -0.000014
    18  C    0.402531   0.396853   0.415581  -0.007835
    19  H    0.562088  -0.028212  -0.018453   0.000703
    20  H   -0.028212   0.579253  -0.034467   0.002885
    21  H   -0.018453  -0.034467   0.558781   0.000630
    22  H    0.000703   0.002885   0.000630   0.433612
 Mulliken atomic charges:
              1
     1  N   -0.387667
     2  C   -0.011888
     3  H    0.112419
     4  C   -0.301353
     5  H    0.103031
     6  H    0.110138
     7  H    0.096210
     8  C   -0.026601
     9  H    0.107720
    10  C   -0.290177
    11  H    0.096033
    12  H    0.102597
    13  H    0.108981
    14  C   -0.387425
    15  H    0.120747
    16  H    0.116661
    17  H    0.126092
    18  C   -0.382046
    19  H    0.118617
    20  H    0.113605
    21  H    0.125454
    22  H    0.228852
 Sum of Mulliken charges=   0.00000
 Atomic charges with hydrogens summed into heavy atoms:
              1
     1  N   -0.158815
     2  C    0.100531
     3  H    0.000000
     4  C    0.008027
     5  H    0.000000
     6  H    0.000000
     7  H    0.000000
     8  C    0.081120
     9  H    0.000000
    10  C    0.017434
    11  H    0.000000
    12  H    0.000000
    13  H    0.000000
    14  C   -0.023926
    15  H    0.000000
    16  H    0.000000
    17  H    0.000000
    18  C   -0.024370
    19  H    0.000000
    20  H    0.000000
    21  H    0.000000
    22  H    0.000000
 Sum of Mulliken charges=   0.00000
 APT atomic charges:
              1
     1  N   -0.710274
     2  C    0.450678
     3  H   -0.062409
     4  C    0.005547
     5  H   -0.040111
     6  H   -0.022054
     7  H   -0.017240
     8  C    0.464957
     9  H   -0.079895
    10  C    0.002385
    11  H   -0.015775
    12  H   -0.035905
    13  H   -0.022783
    14  C   -0.000188
    15  H   -0.016290
    16  H   -0.013135
    17  H   -0.003208
    18  C    0.011673
    19  H   -0.015100
    20  H   -0.012071
    21  H   -0.009246
    22  H    0.140442
 Sum of APT charges=   0.00000
 APT Atomic charges with hydrogens summed into heavy atoms:
              1
     1  N   -0.569832
     2  C    0.388269
     3  H    0.000000
     4  C   -0.073858
     5  H    0.000000
     6  H    0.000000
     7  H    0.000000
     8  C    0.385063
     9  H    0.000000
    10  C   -0.072077
    11  H    0.000000
    12  H    0.000000
    13  H    0.000000
    14  C   -0.032821
    15  H    0.000000
    16  H    0.000000
    17  H    0.000000
    18  C   -0.024744
    19  H    0.000000
    20  H    0.000000
    21  H    0.000000
    22  H    0.000000
 Sum of APT charges=   0.00000
 Electronic spatial extent (au):  <R**2>=  1076.0707
 Charge=     0.0000 electrons
 Dipole moment (field-independent basis, Debye):
    X=    -0.0088    Y=    -0.0291    Z=     0.0895  Tot=     0.0945
 Quadrupole moment (field-independent basis, Debye-Ang):
   XX=   -48.0426   YY=   -49.4559   ZZ=   -46.7217
   XY=    -0.6860   XZ=    -0.0528   YZ=    -0.3190
 Traceless Quadrupole moment (field-independent basis, Debye-Ang):
   XX=     0.0308   YY=    -1.3825   ZZ=     1.3517
   XY=    -0.6860   XZ=    -0.0528   YZ=    -0.3190
 Octapole moment (field-independent basis, Debye-Ang**2):
  XXX=     0.8756  YYY=    -0.2249  ZZZ=     4.8268  XYY=    -0.1995
  XXY=     0.0220  XXZ=    -1.4668  XZZ=    -0.0903  YZZ=    -0.3012
  YYZ=     0.5167  XYZ=     3.2391
 Hexadecapole moment (field-independent basis, Debye-Ang**3):
 XXXX= -1015.1448 YYYY=  -317.5035 ZZZZ=  -207.1597 XXXY=    -5.0079
 XXXZ=    -2.1797 YYYX=    -4.9817 YYYZ=    -0.5407 ZZZX=     0.3731
 ZZZY=    -0.6310 XXYY=  -226.6881 XXZZ=  -203.8831 YYZZ=   -86.5696
 XXYZ=    -1.3125 YYXZ=     0.5997 ZZXY=     0.3564
 N-N= 3.346207630831D+02 E-N=-1.347231580395D+03  KE= 2.912534956720D+02
  Exact polarizability:  92.652   0.522  78.617  -0.013   0.232  74.748
 Approx polarizability: 111.544   0.795 106.039  -0.152   0.250 108.022
 ***** Axes restored to original set *****
 -------------------------------------------------------------------
 Center     Atomic                   Forces (Hartrees/Bohr)
 Number     Number              X              Y              Z
 -------------------------------------------------------------------
    1          7          -0.060743413    0.124356701   -0.015507300
    2          6           0.004815245   -0.025119394    0.001000966
    3          1          -0.001384216    0.002358058    0.001653572
    4          6          -0.003954087    0.006476163   -0.001150632
    5          1           0.001390604    0.001944151    0.000526409
    6          1           0.000271799   -0.000128075    0.000312985
    7          1           0.000022348   -0.001086050    0.000825484
    8          6           0.011890671   -0.019484996    0.007904957
    9          1          -0.001261226    0.003947241   -0.002091224
   10          6          -0.000668685    0.004944047   -0.001150718
   11          1           0.000883579   -0.000682268    0.000113214
   12          1          -0.001466405    0.000628468   -0.000477805
   13          1          -0.000116380    0.000192964   -0.000694915
   14          6          -0.011689329    0.012860118    0.009582863
   15          1           0.007228405    0.007345659   -0.011698901
   16          1           0.014008332   -0.006030621    0.003867136
   17          1          -0.005436016   -0.010099347   -0.008029622
   18          6           0.002379846    0.017458906   -0.012481359
   19          1          -0.012336954   -0.000110928    0.008430702
   20          1          -0.002398274   -0.015038301   -0.004713512
   21          1           0.009820144   -0.001689364    0.010671411
   22          1           0.048744013   -0.103043132    0.013106290
 -------------------------------------------------------------------
 Cartesian Forces:  Max     0.124356701 RMS     0.023408753

 GradGradGradGradGradGradGradGradGradGradGradGradGradGradGradGradGradGrad
 Berny optimization.
 Internal  Forces:  Max     0.114723273 RMS     0.011839408
 Search for a local minimum.
 Step number   1 out of a maximum of 118
 All quantities printed in internal units (Hartrees-Bohrs-Radians)
 Second derivative matrix not updated -- analytic derivatives used.
     Eigenvalues ---   -0.00438   0.00044   0.00140   0.00208   0.00265
     Eigenvalues ---    0.00310   0.00325   0.04124   0.04223   0.04382
     Eigenvalues ---    0.04459   0.04520   0.04532   0.04724   0.04736
     Eigenvalues ---    0.04743   0.04787   0.04857   0.05015   0.05553
     Eigenvalues ---    0.05564   0.11167   0.11973   0.12000   0.12397
     Eigenvalues ---    0.12417   0.12706   0.12797   0.13227   0.13750
     Eigenvalues ---    0.14242   0.14480   0.15041   0.15329   0.16816
     Eigenvalues ---    0.17911   0.18460   0.19839   0.20873   0.27242
     Eigenvalues ---    0.27907   0.28455   0.28635   0.31264   0.32356
     Eigenvalues ---    0.33262   0.33331   0.33434   0.33485   0.34200
     Eigenvalues ---    0.34264   0.35026   0.35920   0.37861   0.37870
     Eigenvalues ---    0.37970   0.38004   0.38630   0.38663   0.86201
     Eigenvalues --- 1000.000001000.000001000.000001000.000001000.00000
     Eigenvalues --- 1000.000001000.000001000.000001000.000001000.00000
     Eigenvalues --- 1000.000001000.000001000.000001000.000001000.00000
     Eigenvalues --- 1000.000001000.000001000.000001000.000001000.00000
     Eigenvalues --- 1000.000001000.000001000.000001000.000001000.00000
     Eigenvalues --- 1000.000001000.000001000.000001000.000001000.00000
     Eigenvalues --- 1000.000001000.000001000.000001000.000001000.00000
     Eigenvalues --- 1000.000001000.000001000.000001000.000001000.00000
     Eigenvalues --- 1000.000001000.000001000.000001000.000001000.00000
     Eigenvalues --- 1000.000001000.000001000.00000
 RFO step:  Lambda=-2.30761031D-02.
 Linear search not attempted -- first point.
 Iteration  1 RMS(Cart)=  0.03408661 RMS(Int)=  0.00075268
 Iteration  2 RMS(Cart)=  0.00140139 RMS(Int)=  0.00019293
 Iteration  3 RMS(Cart)=  0.00000066 RMS(Int)=  0.00019293
 Variable       Old X    -DE/DX   Delta X   Delta X   Delta X     New X
                                 (Linear)    (Quad)   (Total)
    R1        2.76688  -0.00436   0.00000  -0.02620  -0.02620   2.74068
    R2        2.75869  -0.00572   0.00000  -0.02054  -0.02054   2.73814
    R3        1.71965   0.11472   0.00000   0.13047   0.13047   1.85012
    R4        2.06346   0.00144   0.00000   0.00757   0.00757   2.07103
    R5        2.88888   0.00317   0.00000   0.01660   0.01660   2.90548
    R6        2.91018   0.00495   0.00000  -0.00599  -0.00599   2.90419
    R7        2.06434   0.00177   0.00000   0.00408   0.00408   2.06841
    R8        2.06421   0.00002   0.00000  -0.00042  -0.00042   2.06380
    R9        2.06060   0.00097   0.00000   0.00387   0.00387   2.06447
   R10        2.06687   0.00243   0.00000   0.00994   0.00994   2.07681
   R11        2.88908   0.00250   0.00000   0.01403   0.01403   2.90312
   R12        2.91018   0.00134   0.00000  -0.01461  -0.01461   2.89557
   R13        2.06258   0.00050   0.00000   0.00206   0.00206   2.06464
   R14        2.06447   0.00119   0.00000   0.00312   0.00312   2.06759
   R15        2.06268   0.00061   0.00000   0.00087   0.00087   2.06355
   R16        2.02201   0.01478   0.00000   0.03640   0.03640   2.05840
   R17        2.02201   0.01539   0.00000   0.03963   0.03963   2.06164
   R18        2.02201   0.01367   0.00000   0.03554   0.03554   2.05755
   R19        2.02201   0.01447   0.00000   0.03581   0.03581   2.05782
   R20        2.02201   0.01574   0.00000   0.04043   0.04043   2.06244
   R21        2.02201   0.01441   0.00000   0.03653   0.03653   2.05853
    A1        2.08446   0.01026   0.00000   0.05407   0.05396   2.13841
    A2        2.08416  -0.00339   0.00000  -0.01393  -0.01406   2.07010
    A3        2.11420  -0.00689   0.00000  -0.04087  -0.04097   2.07323
    A4        1.88757  -0.00073   0.00000  -0.00351  -0.00410   1.88348
    A5        1.97223  -0.00349   0.00000  -0.00891  -0.00973   1.96250
    A6        1.87180   0.00691   0.00000   0.04443   0.04432   1.91612
    A7        1.92977  -0.00136   0.00000  -0.03781  -0.03796   1.89181
    A8        1.88132  -0.00093   0.00000  -0.00184  -0.00189   1.87943
    A9        1.91803  -0.00009   0.00000   0.01008   0.00991   1.92794
   A10        1.92313   0.00275   0.00000   0.02011   0.02012   1.94325
   A11        1.94755  -0.00003   0.00000  -0.00729  -0.00733   1.94023
   A12        1.92750  -0.00123   0.00000  -0.00663  -0.00668   1.92082
   A13        1.88214  -0.00103   0.00000  -0.00180  -0.00179   1.88036
   A14        1.88840  -0.00037   0.00000   0.00051   0.00051   1.88890
   A15        1.89346  -0.00014   0.00000  -0.00492  -0.00501   1.88845
   A16        1.89585   0.00038   0.00000   0.00374   0.00290   1.89876
   A17        1.98800  -0.00363   0.00000  -0.01987  -0.02037   1.96764
   A18        1.87948   0.00371   0.00000   0.02682   0.02686   1.90634
   A19        1.92316  -0.00159   0.00000  -0.03299  -0.03318   1.88998
   A20        1.85778  -0.00002   0.00000   0.01017   0.01020   1.86798
   A21        1.91459   0.00149   0.00000   0.01536   0.01559   1.93018
   A22        1.93345  -0.00178   0.00000  -0.01039  -0.01041   1.92303
   A23        1.92340   0.00182   0.00000   0.01538   0.01540   1.93880
   A24        1.94920   0.00042   0.00000  -0.00593  -0.00596   1.94324
   A25        1.89027   0.00016   0.00000   0.00267   0.00271   1.89298
   A26        1.88576   0.00025   0.00000  -0.00004  -0.00012   1.88564
   A27        1.87980  -0.00087   0.00000  -0.00151  -0.00150   1.87831
   A28        1.91063   0.00508   0.00000   0.02528   0.02505   1.93568
   A29        1.91063   0.00322   0.00000   0.02217   0.02195   1.93258
   A30        1.91063   0.00169   0.00000   0.01507   0.01485   1.92549
   A31        1.91063  -0.00439   0.00000  -0.02823  -0.02845   1.88218
   A32        1.91063  -0.00329   0.00000  -0.01852  -0.01874   1.89190
   A33        1.91063  -0.00231   0.00000  -0.01576  -0.01596   1.89467
   A34        1.91063   0.00398   0.00000   0.02301   0.02280   1.93344
   A35        1.91063   0.00229   0.00000   0.01754   0.01737   1.92800
   A36        1.91063   0.00201   0.00000   0.01802   0.01780   1.92844
   A37        1.91063  -0.00343   0.00000  -0.02540  -0.02555   1.88508
   A38        1.91063  -0.00274   0.00000  -0.01701  -0.01726   1.89338
   A39        1.91063  -0.00212   0.00000  -0.01616  -0.01634   1.89430
    D1       -0.61643   0.00128   0.00000  -0.00308  -0.00312  -0.61955
    D2        1.52574  -0.00329   0.00000  -0.05961  -0.05975   1.46599
    D3       -2.64112  -0.00084   0.00000  -0.02209  -0.02223  -2.66335
    D4        2.55372   0.00191   0.00000   0.02649   0.02667   2.58039
    D5       -1.58729  -0.00266   0.00000  -0.03004  -0.02996  -1.61725
    D6        0.52903  -0.00020   0.00000   0.00749   0.00756   0.53659
    D7       -0.78382   0.00226   0.00000   0.03930   0.03931  -0.74451
    D8        1.36663  -0.00204   0.00000  -0.01438  -0.01446   1.35217
    D9       -2.78915   0.00016   0.00000   0.01155   0.01129  -2.77786
   D10        2.32871   0.00167   0.00000   0.00969   0.00993   2.33863
   D11       -1.80403  -0.00262   0.00000  -0.04398  -0.04384  -1.84787
   D12        0.32338  -0.00042   0.00000  -0.01805  -0.01810   0.30528
   D13       -3.11773   0.00352   0.00000   0.03072   0.03048  -3.08725
   D14       -1.02739   0.00404   0.00000   0.03712   0.03684  -0.99054
   D15        1.08017   0.00300   0.00000   0.02149   0.02126   1.10144
   D16       -0.99923  -0.00085   0.00000  -0.00749  -0.00733  -1.00656
   D17        1.09111  -0.00033   0.00000  -0.00109  -0.00097   1.09014
   D18       -3.08452  -0.00137   0.00000  -0.01672  -0.01655  -3.10106
   D19        1.07550  -0.00290   0.00000  -0.02689  -0.02679   1.04871
   D20       -3.11734  -0.00238   0.00000  -0.02049  -0.02042  -3.13777
   D21       -1.00978  -0.00342   0.00000  -0.03612  -0.03601  -1.04579
   D22        2.73496   0.00185   0.00000   0.03802   0.03782   2.77278
   D23       -1.45383   0.00155   0.00000   0.03251   0.03232  -1.42151
   D24        0.64057   0.00173   0.00000   0.03600   0.03580   0.67637
   D25        0.70614  -0.00036   0.00000   0.02035   0.02031   0.72645
   D26        2.80054  -0.00066   0.00000   0.01483   0.01481   2.81535
   D27       -1.38825  -0.00049   0.00000   0.01832   0.01829  -1.36996
   D28       -1.39811   0.00191   0.00000   0.06148   0.06170  -1.33641
   D29        0.69628   0.00161   0.00000   0.05596   0.05620   0.75248
   D30        2.79068   0.00178   0.00000   0.05946   0.05968   2.85036
   D31        1.06487   0.00203   0.00000   0.01950   0.01926   1.08413
   D32       -3.12674   0.00227   0.00000   0.02614   0.02586  -3.10087
   D33       -1.03809   0.00266   0.00000   0.03066   0.03036  -1.00773
   D34       -3.08281  -0.00128   0.00000  -0.01483  -0.01453  -3.09734
   D35       -0.99123  -0.00104   0.00000  -0.00819  -0.00793  -0.99915
   D36        1.09741  -0.00066   0.00000  -0.00367  -0.00343   1.09399
   D37       -1.04302  -0.00136   0.00000  -0.01273  -0.01270  -1.05572
   D38        1.04856  -0.00112   0.00000  -0.00609  -0.00609   1.04246
   D39        3.13720  -0.00073   0.00000  -0.00157  -0.00160   3.13560
   D40        2.98211   0.00180   0.00000   0.02640   0.02632   3.00843
   D41       -1.20668   0.00144   0.00000   0.02012   0.02001  -1.18667
   D42        0.88771   0.00148   0.00000   0.02210   0.02198   0.90969
   D43        0.95169  -0.00044   0.00000   0.00390   0.00392   0.95561
   D44        3.04608  -0.00079   0.00000  -0.00238  -0.00239   3.04369
   D45       -1.14271  -0.00075   0.00000  -0.00040  -0.00043  -1.14313
   D46       -1.12875   0.00067   0.00000   0.02907   0.02921  -1.09954
   D47        0.96565   0.00031   0.00000   0.02279   0.02289   0.98854
   D48        3.06004   0.00036   0.00000   0.02477   0.02486   3.08490
         Item               Value     Threshold  Converged?
 Maximum Force            0.114723     0.000015     NO 
 RMS     Force            0.011839     0.000010     NO 
 Maximum Displacement     0.151061     0.000060     NO 
 RMS     Displacement     0.033923     0.000040     NO 
 Predicted change in Energy=-1.247542D-02
 GradGradGradGradGradGradGradGradGradGradGradGradGradGradGradGradGradGrad

                          Input orientation:                          
 ---------------------------------------------------------------------
 Center     Atomic     Atomic              Coordinates (Angstroms)
 Number     Number      Type              X           Y           Z
 ---------------------------------------------------------------------
    1          7             0       -0.085525   -0.161606    0.056558
    2          6             0        0.649881    0.870643   -0.648447
    3          1             0       -0.075115    1.498997   -1.178200
    4          6             0        1.463672    1.764485    0.301684
    5          1             0        1.967152    2.569717   -0.242527
    6          1             0        0.822393    2.223719    1.057052
    7          1             0        2.224172    1.171210    0.814673
    8          6             0       -1.383827    0.076932    0.654057
    9          1             0       -1.365708    1.050756    1.163122
   10          6             0       -2.519349    0.094851   -0.380533
   11          1             0       -2.594259   -0.876609   -0.874846
   12          1             0       -3.480090    0.317451    0.093312
   13          1             0       -2.345894    0.852211   -1.147834
   14          6             0        1.568067    0.228852   -1.700531
   15          1             0        1.838675    0.949141   -2.471532
   16          1             0        2.489762   -0.130796   -1.240804
   17          1             0        1.067202   -0.612455   -2.176806
   18          6             0       -1.648535   -0.985076    1.726398
   19          1             0       -2.554659   -0.753402    2.284145
   20          1             0       -1.776544   -1.967038    1.267588
   21          1             0       -0.815563   -1.035924    2.426549
   22          1             0        0.333377   -1.038727    0.173625
 ---------------------------------------------------------------------
                    Distance matrix (angstroms):
                    1          2          3          4          5
     1  N    0.000000
     2  C    1.450308   0.000000
     3  H    2.069381   1.095941   0.000000
     4  C    2.483933   1.537516   2.151373   0.000000
     5  H    3.429732   2.187881   2.488529   1.094558   0.000000
     6  H    2.741364   2.183872   2.515371   1.092115   1.766095
     7  H    2.772334   2.170127   3.060344   1.092471   1.771878
     8  C    1.448963   2.542138   2.663111   3.328701   4.271639
     9  H    2.081627   2.716030   2.710782   3.042512   3.923143
    10  C    2.486024   3.273782   2.929536   4.372363   5.125690
    11  H    2.769926   3.691693   3.475862   4.982611   5.751823
    12  H    3.428398   4.232362   3.821865   5.155396   5.904061
    13  H    2.754569   3.037169   2.361290   4.176858   4.729881
    14  C    2.444215   1.536829   2.141529   2.525457   2.786520
    15  H    3.365642   2.177851   2.374372   2.914814   2.758847
    16  H    2.883783   2.176908   3.039529   2.650324   2.926166
    17  H    2.553421   2.170166   2.600064   3.456869   3.831131
    18  C    2.430940   3.790290   4.133153   4.390413   5.439339
    19  H    3.377720   4.637532   4.817601   5.139737   6.154183
    20  H    2.754219   4.196566   4.570573   5.035497   6.072713
    21  H    2.629495   3.903603   4.468590   4.189540   5.279025
    22  H    0.979043   2.102777   2.904194   3.025221   3.982872
                    6          7          8          9         10
     6  H    0.000000
     7  H    1.769606   0.000000
     8  C    3.104594   3.773712   0.000000
     9  H    2.484930   3.608762   1.099003   0.000000
    10  C    4.214969   5.008798   1.536264   2.151165   0.000000
    11  H    5.001777   5.501392   2.170699   3.062252   1.092562
    12  H    4.803541   5.812733   2.183255   2.480491   1.094122
    13  H    4.096412   4.983844   2.184821   2.518075   1.091986
    14  C    3.484220   2.764917   3.779000   4.181276   4.297362
    15  H    3.886938   3.316183   4.573246   4.846556   4.908611
    16  H    3.688360   2.447599   4.317215   4.694633   5.087453
    17  H    4.308323   3.670012   3.807438   4.454261   4.073110
    18  C    4.104859   4.525336   1.532268   2.131169   2.522641
    19  H    4.666207   5.357305   2.171978   2.434191   2.796657
    20  H    4.935710   5.104847   2.169898   3.047421   2.742161
    21  H    3.896625   4.087734   2.168663   2.500627   3.472930
    22  H    3.415133   2.978233   2.103402   2.869135   3.119316
                   11         12         13         14         15
    11  H    0.000000
    12  H    1.774206   0.000000
    13  H    1.767775   1.764317   0.000000
    14  C    4.385061   5.358135   4.001642   0.000000
    15  H    5.053086   5.938579   4.390010   1.089260   0.000000
    16  H    5.151450   6.133509   4.935435   1.090971   1.762064
    17  H    3.895019   5.166820   3.853992   1.088807   1.766527
    18  C    2.769952   2.778154   3.481831   4.854276   5.790030
    19  H    3.161641   2.608236   3.794741   5.817159   6.694513
    20  H    2.539236   3.082188   3.755874   4.981775   5.962796
    21  H    3.753445   3.791480   4.322404   4.930937   5.914107
    22  H    3.113941   4.048234   3.535590   2.577533   3.635162
                   16         17         18         19         20
    16  H    0.000000
    17  H    1.769682   0.000000
    18  C    5.163292   4.769599   0.000000
    19  H    6.185394   5.747854   1.088952   0.000000
    20  H    5.278749   4.667509   1.091395   1.764019   0.000000
    21  H    5.019353   4.991493   1.089329   1.767641   1.770211
    22  H    2.734035   2.498946   2.518324   3.588378   2.551525
                   21         22
    21  H    0.000000
    22  H    2.528979   0.000000
 Stoichiometry    C6H15N
 Framework group  C1[X(C6H15N)]
 Deg. of freedom    60
 Full point group                 C1
 Largest Abelian subgroup         C1      NOp   1
 Largest concise Abelian subgroup C1      NOp   1
                         Standard orientation:                         
 ---------------------------------------------------------------------
 Center     Atomic     Atomic              Coordinates (Angstroms)
 Number     Number      Type              X           Y           Z
 ---------------------------------------------------------------------
    1          7             0        0.005140   -0.046486    0.469025
    2          6             0       -1.255308    0.154233   -0.219724
    3          1             0       -1.066073    0.793372   -1.089654
    4          6             0       -1.871743   -1.165407   -0.712183
    5          1             0       -2.793017   -0.988665   -1.276162
    6          1             0       -1.180826   -1.704357   -1.364013
    7          1             0       -2.109865   -1.808123    0.138526
    8          6             0        1.266711   -0.164650   -0.233805
    9          1             0        1.122535   -0.805912   -1.114602
   10          6             0        1.811197    1.191178   -0.708540
   11          1             0        2.008753    1.839095    0.148703
   12          1             0        2.741713    1.066735   -1.270465
   13          1             0        1.097412    1.700083   -1.359661
   14          6             0       -2.238140    0.896204    0.699712
   15          1             0       -3.023326    1.379715    0.119894
   16          1             0       -2.714473    0.203459    1.395002
   17          1             0       -1.715750    1.659397    1.274295
   18          6             0        2.284431   -0.867178    0.670931
   19          1             0        3.199045   -1.089820    0.123457
   20          1             0        2.544941   -0.230724    1.518399
   21          1             0        1.874344   -1.801397    1.052639
   22          1             0       -0.004281   -0.153733    1.442131
 ---------------------------------------------------------------------
 Rotational constants (GHZ):      4.0678848      1.4129306      1.2985366
 Standard basis: TZVP (5D, 7F)
 There are   223 symmetry adapted basis functions of A   symmetry.
 Integral buffers will be    131072 words long.
 Raffenetti 2 integral format.
 Two-electron integral symmetry is turned on.
   223 basis functions,   365 primitive gaussians,   230 cartesian basis functions
    29 alpha electrons       29 beta electrons
       nuclear repulsion energy       333.3281881061 Hartrees.
 NAtoms=   22 NActive=   22 NUniq=   22 SFac= 7.50D-01 NAtFMM=   80 NAOKFM=F Big=F
 One-electron integrals computed using PRISM.
 NBasis=   223 RedAO= T  NBF=   223
 NBsUse=   223 1.00D-06 NBFU=   223
 Initial guess read from the read-write file:
 Initial guess orbital symmetries:
       Occupied  (A) (A) (A) (A) (A) (A) (A) (A) (A) (A) (A) (A)
                 (A) (A) (A) (A) (A) (A) (A) (A) (A) (A) (A) (A)
                 (A) (A) (A) (A) (A)
       Virtual   (A) (A) (A) (A) (A) (A) (A) (A) (A) (A) (A) (A)
                 (A) (A) (A) (A) (A) (A) (A) (A) (A) (A) (A) (A)
                 (A) (A) (A) (A) (A) (A) (A) (A) (A) (A) (A) (A)
                 (A) (A) (A) (A) (A) (A) (A) (A) (A) (A) (A) (A)
                 (A) (A) (A) (A) (A) (A) (A) (A) (A) (A) (A) (A)
                 (A) (A) (A) (A) (A) (A) (A) (A) (A) (A) (A) (A)
                 (A) (A) (A) (A) (A) (A) (A) (A) (A) (A) (A) (A)
                 (A) (A) (A) (A) (A) (A) (A) (A) (A) (A) (A) (A)
                 (A) (A) (A) (A) (A) (A) (A) (A) (A) (A) (A) (A)
                 (A) (A) (A) (A) (A) (A) (A) (A) (A) (A) (A) (A)
                 (A) (A) (A) (A) (A) (A) (A) (A) (A) (A) (A) (A)
                 (A) (A) (A) (A) (A) (A) (A) (A) (A) (A) (A) (A)
                 (A) (A) (A) (A) (A) (A) (A) (A) (A) (A) (A) (A)
                 (A) (A) (A) (A) (A) (A) (A) (A) (A) (A) (A) (A)
                 (A) (A) (A) (A) (A) (A) (A) (A) (A) (A) (A) (A)
                 (A) (A) (A) (A) (A) (A) (A) (A) (A) (A) (A) (A)
                 (A) (A)
 Harris functional with IExCor=  402 diagonalized for initial guess.
 ExpMin= 9.52D-02 ExpMax= 1.97D+04 ExpMxC= 6.73D+02 IAcc=2 IRadAn=         4 AccDes= 0.00D+00
 HarFok:  IExCor= 402 AccDes= 0.00D+00 IRadAn=         4 IDoV=1
 ScaDFX=  1.000000  1.000000  1.000000  1.000000
 Requested convergence on RMS density matrix=1.00D-08 within 128 cycles.
 Requested convergence on MAX density matrix=1.00D-06.
 Requested convergence on             energy=1.00D-06.
 No special actions if energy rises.
 Keep R1 integrals in memory in canonical form, NReq=   360237098.
 Integral accuracy reduced to 1.0D-05 until final iterations.
 Initial convergence to 1.0D-05 achieved.  Increase integral accuracy.
 SCF Done:  E(RB+HF-LYP) =  -292.524652089     A.U. after   12 cycles
             Convg  =    0.2582D-08             -V/T =  2.0054
             S**2   =   0.0000
 Range of M.O.s used for correlation:     1   223
 NBasis=   223 NAE=    29 NBE=    29 NFC=     0 NFV=     0
 NROrb=    223 NOA=    29 NOB=    29 NVA=   194 NVB=   194

 **** Warning!!: The largest alpha MO coefficient is  0.18127036D+02

 Symmetrizing basis deriv contribution to polar:
 IMax=3 JMax=2 DiffMx= 0.00D+00
 G2DrvN: will do   23 centers at a time, making    1 passes doing MaxLOS=2.
 FoFDir/FoFCou used for L=0 through L=2.
 DoAtom=TTTTTTTTTTTTTTTTTTTTTT
          Differentiating once with respect to electric field.
                with respect to dipole field.
          Differentiating once with respect to nuclear coordinates.
          Store integrals in memory, NReq=   353689553.
          There are  69 degrees of freedom in the 1st order CPHF.
    66 vectors were produced by pass  0.
 AX will form  66 AO Fock derivatives at one time.
    66 vectors were produced by pass  1.
    66 vectors were produced by pass  2.
    66 vectors were produced by pass  3.
    66 vectors were produced by pass  4.
    31 vectors were produced by pass  5.
     3 vectors were produced by pass  6.
     1 vectors were produced by pass  7.
 Inv2:  IOpt= 1 Iter= 1 AM= 2.75D-15 Conv= 1.00D-12.
 Inverted reduced A of dimension  365 with in-core refinement.
 Isotropic polarizability for W=    0.000000       83.50 Bohr**3.
 End of Minotr Frequency-dependent properties file   721 does not exist.
 ***** Axes restored to original set *****
 -------------------------------------------------------------------
 Center     Atomic                   Forces (Hartrees/Bohr)
 Number     Number              X              Y              Z
 -------------------------------------------------------------------
    1          7          -0.013018247    0.024368481   -0.005610817
    2          6           0.002588713   -0.005695569    0.001025693
    3          1          -0.000585004    0.000066207    0.000416533
    4          6          -0.000853388    0.003049627   -0.001549856
    5          1           0.000176082    0.000164264    0.000165159
    6          1           0.000009228   -0.000183985    0.000101751
    7          1          -0.000208716   -0.000167524    0.000335751
    8          6           0.002612824   -0.003992843    0.002853486
    9          1          -0.000310981    0.000731700   -0.000756854
   10          6          -0.000981654    0.001605556    0.000459045
   11          1           0.000165704   -0.000049053   -0.000036655
   12          1          -0.000127206    0.000186327   -0.000148624
   13          1           0.000185274   -0.000158687   -0.000149228
   14          6          -0.002119172    0.002364373    0.001182098
   15          1           0.001962649    0.000979411   -0.000590138
   16          1           0.001179054   -0.001756448    0.000397226
   17          1          -0.000806141   -0.000338619   -0.001861043
   18          6           0.000288336    0.002832207   -0.001736581
   19          1          -0.001614433   -0.000571150    0.000569202
   20          1           0.000125953   -0.001864936   -0.000319277
   21          1           0.000728992   -0.000007530    0.001538254
   22          1           0.010602134   -0.021561809    0.003714874
 -------------------------------------------------------------------
 Cartesian Forces:  Max     0.024368481 RMS     0.004801796

 GradGradGradGradGradGradGradGradGradGradGradGradGradGradGradGradGradGrad
 Berny optimization.
 Internal  Forces:  Max     0.024297681 RMS     0.002431601
 Search for a local minimum.
 Step number   2 out of a maximum of 118
 All quantities printed in internal units (Hartrees-Bohrs-Radians)
 Second derivative matrix not updated -- analytic derivatives used.
 Trust test= 1.08D+00 RLast= 2.85D-01 DXMaxT set to 4.24D-01
     Eigenvalues ---   -0.00490   0.00099   0.00137   0.00199   0.00253
     Eigenvalues ---    0.00317   0.00325   0.04086   0.04167   0.04419
     Eigenvalues ---    0.04453   0.04497   0.04525   0.04620   0.04637
     Eigenvalues ---    0.04651   0.04709   0.04910   0.05106   0.05357
     Eigenvalues ---    0.05421   0.11676   0.11879   0.11898   0.12339
     Eigenvalues ---    0.12417   0.12480   0.12517   0.12861   0.13400
     Eigenvalues ---    0.14109   0.14244   0.14815   0.15018   0.16289
     Eigenvalues ---    0.18234   0.18813   0.19327   0.20414   0.26413
     Eigenvalues ---    0.26837   0.28462   0.28723   0.30695   0.31685
     Eigenvalues ---    0.32928   0.33054   0.33232   0.33260   0.33570
     Eigenvalues ---    0.33645   0.34010   0.34034   0.34076   0.34114
     Eigenvalues ---    0.34699   0.34734   0.36059   0.36879   0.55909
     Eigenvalues --- 1000.000001000.000001000.000001000.000001000.00000
     Eigenvalues --- 1000.000001000.000001000.000001000.000001000.00000
     Eigenvalues --- 1000.000001000.000001000.000001000.000001000.00000
     Eigenvalues --- 1000.000001000.000001000.000001000.000001000.00000
     Eigenvalues --- 1000.000001000.000001000.000001000.000001000.00000
     Eigenvalues --- 1000.000001000.000001000.000001000.000001000.00000
     Eigenvalues --- 1000.000001000.000001000.000001000.000001000.00000
     Eigenvalues --- 1000.000001000.000001000.000001000.000001000.00000
     Eigenvalues --- 1000.000001000.000001000.000001000.000001000.00000
     Eigenvalues --- 1000.000001000.000001000.00000
 RFO step:  Lambda=-5.88823425D-03.
 Quintic linear search produced a step of  0.32590.
 Maximum step size (   0.424) exceeded in Quadratic search.
    -- Step size scaled by   0.235
 Iteration  1 RMS(Cart)=  0.05121297 RMS(Int)=  0.00248407
 Iteration  2 RMS(Cart)=  0.00349839 RMS(Int)=  0.00129921
 Iteration  3 RMS(Cart)=  0.00001053 RMS(Int)=  0.00129918
 Iteration  4 RMS(Cart)=  0.00000004 RMS(Int)=  0.00129918
 Variable       Old X    -DE/DX   Delta X   Delta X   Delta X     New X
                                 (Linear)    (Quad)   (Total)
    R1        2.74068  -0.00022  -0.00854  -0.00046  -0.00900   2.73169
    R2        2.73814  -0.00025  -0.00670   0.00293  -0.00376   2.73438
    R3        1.85012   0.02430   0.04252  -0.00093   0.04159   1.89171
    R4        2.07103   0.00022   0.00247  -0.00049   0.00198   2.07301
    R5        2.90548   0.00062   0.00541   0.00178   0.00719   2.91268
    R6        2.90419   0.00020  -0.00195  -0.00440  -0.00636   2.89783
    R7        2.06841   0.00012   0.00133  -0.00078   0.00055   2.06897
    R8        2.06380  -0.00001  -0.00014   0.00008  -0.00006   2.06374
    R9        2.06447   0.00010   0.00126   0.00051   0.00177   2.06624
   R10        2.07681   0.00029   0.00324   0.00132   0.00456   2.08137
   R11        2.90312   0.00050   0.00457  -0.00245   0.00212   2.90524
   R12        2.89557  -0.00015  -0.00476  -0.00141  -0.00618   2.88939
   R13        2.06464   0.00005   0.00067  -0.00045   0.00022   2.06486
   R14        2.06759   0.00008   0.00102  -0.00021   0.00080   2.06839
   R15        2.06355   0.00003   0.00028  -0.00012   0.00016   2.06372
   R16        2.05840   0.00155   0.01186  -0.00139   0.01047   2.06887
   R17        2.06164   0.00175   0.01292  -0.00089   0.01203   2.07366
   R18        2.05755   0.00144   0.01158  -0.00177   0.00982   2.06736
   R19        2.05782   0.00151   0.01167  -0.00160   0.01007   2.06789
   R20        2.06244   0.00180   0.01318  -0.00168   0.01149   2.07393
   R21        2.05853   0.00154   0.01190  -0.00090   0.01101   2.06954
    A1        2.13841   0.00165   0.01758  -0.00556   0.00441   2.14282
    A2        2.07010  -0.00065  -0.00458  -0.00467  -0.01714   2.05296
    A3        2.07323  -0.00103  -0.01335  -0.00087  -0.02193   2.05130
    A4        1.88348  -0.00017  -0.00134  -0.00614  -0.00765   1.87583
    A5        1.96250  -0.00014  -0.00317   0.01115   0.00762   1.97012
    A6        1.91612   0.00115   0.01444  -0.00472   0.00960   1.92572
    A7        1.89181  -0.00086  -0.01237  -0.00228  -0.01468   1.87714
    A8        1.87943  -0.00009  -0.00062   0.00036  -0.00024   1.87919
    A9        1.92794   0.00007   0.00323   0.00107   0.00413   1.93207
   A10        1.94325   0.00051   0.00656  -0.00048   0.00607   1.94932
   A11        1.94023  -0.00018  -0.00239   0.00156  -0.00084   1.93939
   A12        1.92082  -0.00014  -0.00218   0.00145  -0.00075   1.92007
   A13        1.88036  -0.00007  -0.00058  -0.00097  -0.00155   1.87880
   A14        1.88890  -0.00002   0.00017  -0.00099  -0.00083   1.88807
   A15        1.88845  -0.00012  -0.00163  -0.00068  -0.00235   1.88610
   A16        1.89876   0.00004   0.00095   0.00838   0.00882   1.90757
   A17        1.96764  -0.00038  -0.00664  -0.01019  -0.01705   1.95058
   A18        1.90634   0.00068   0.00875   0.00346   0.01223   1.91857
   A19        1.88998  -0.00073  -0.01081  -0.00404  -0.01493   1.87505
   A20        1.86798   0.00022   0.00332   0.00061   0.00390   1.87188
   A21        1.93018   0.00019   0.00508   0.00237   0.00761   1.93779
   A22        1.92303  -0.00023  -0.00339   0.00016  -0.00325   1.91978
   A23        1.93880   0.00038   0.00502  -0.00027   0.00477   1.94357
   A24        1.94324  -0.00013  -0.00194  -0.00274  -0.00471   1.93853
   A25        1.89298   0.00005   0.00088   0.00251   0.00340   1.89638
   A26        1.88564  -0.00001  -0.00004  -0.00102  -0.00110   1.88454
   A27        1.87831  -0.00005  -0.00049   0.00149   0.00101   1.87932
   A28        1.93568   0.00068   0.00816  -0.00101   0.00706   1.94274
   A29        1.93258   0.00057   0.00715  -0.00039   0.00668   1.93926
   A30        1.92549   0.00043   0.00484  -0.00231   0.00245   1.92793
   A31        1.88218  -0.00075  -0.00927  -0.00024  -0.00960   1.87258
   A32        1.89190  -0.00054  -0.00611   0.00358  -0.00261   1.88929
   A33        1.89467  -0.00046  -0.00520   0.00053  -0.00474   1.88993
   A34        1.93344   0.00061   0.00743  -0.00066   0.00669   1.94012
   A35        1.92800   0.00038   0.00566  -0.00062   0.00497   1.93297
   A36        1.92844   0.00046   0.00580   0.00219   0.00790   1.93633
   A37        1.88508  -0.00063  -0.00833   0.00055  -0.00784   1.87724
   A38        1.89338  -0.00046  -0.00562  -0.00149  -0.00722   1.88616
   A39        1.89430  -0.00041  -0.00532  -0.00001  -0.00541   1.88889
    D1       -0.61955  -0.00009  -0.00102  -0.10229  -0.10316  -0.72272
    D2        1.46599  -0.00136  -0.01947  -0.10241  -0.12178   1.34422
    D3       -2.66335  -0.00051  -0.00725  -0.09664  -0.10372  -2.76707
    D4        2.58039   0.00060   0.00869   0.12273   0.13130   2.71168
    D5       -1.61725  -0.00067  -0.00976   0.12262   0.11268  -1.50457
    D6        0.53659   0.00018   0.00246   0.12838   0.13074   0.66733
    D7       -0.74451   0.00088   0.01281   0.08141   0.09383  -0.65068
    D8        1.35217  -0.00027  -0.00471   0.07556   0.07034   1.42251
    D9       -2.77786   0.00021   0.00368   0.07408   0.07712  -2.70074
   D10        2.33863   0.00020   0.00324  -0.14413  -0.14026   2.19837
   D11       -1.84787  -0.00095  -0.01429  -0.14998  -0.16375  -2.01163
   D12        0.30528  -0.00047  -0.00590  -0.15146  -0.15698   0.14831
   D13       -3.08725   0.00075   0.00993   0.00160   0.01147  -3.07579
   D14       -0.99054   0.00089   0.01201   0.00110   0.01303  -0.97751
   D15        1.10144   0.00053   0.00693   0.00220   0.00907   1.11050
   D16       -1.00656  -0.00012  -0.00239  -0.00071  -0.00305  -1.00962
   D17        1.09014   0.00002  -0.00032  -0.00121  -0.00149   1.08866
   D18       -3.10106  -0.00034  -0.00539  -0.00011  -0.00545  -3.10651
   D19        1.04871  -0.00070  -0.00873  -0.00102  -0.00973   1.03898
   D20       -3.13777  -0.00056  -0.00666  -0.00152  -0.00816   3.13725
   D21       -1.04579  -0.00092  -0.01173  -0.00042  -0.01213  -1.05792
   D22        2.77278   0.00082   0.01233   0.03448   0.04673   2.81951
   D23       -1.42151   0.00069   0.01053   0.03326   0.04372  -1.37779
   D24        0.67637   0.00076   0.01167   0.03217   0.04375   0.72012
   D25        0.72645   0.00045   0.00662   0.04417   0.05078   0.77723
   D26        2.81535   0.00032   0.00483   0.04295   0.04777   2.86312
   D27       -1.36996   0.00039   0.00596   0.04186   0.04780  -1.32216
   D28       -1.33641   0.00150   0.02011   0.04611   0.06631  -1.27010
   D29        0.75248   0.00138   0.01831   0.04489   0.06330   0.81578
   D30        2.85036   0.00145   0.01945   0.04380   0.06333   2.91369
   D31        1.08413   0.00042   0.00628   0.00142   0.00755   1.09168
   D32       -3.10087   0.00057   0.00843   0.00450   0.01276  -3.08812
   D33       -1.00773   0.00068   0.00989   0.00437   0.01408  -0.99365
   D34       -3.09734  -0.00028  -0.00473   0.00277  -0.00177  -3.09911
   D35       -0.99915  -0.00012  -0.00258   0.00585   0.00344  -0.99572
   D36        1.09399  -0.00002  -0.00112   0.00572   0.00476   1.09875
   D37       -1.05572  -0.00033  -0.00414   0.00246  -0.00167  -1.05739
   D38        1.04246  -0.00018  -0.00199   0.00553   0.00354   1.04600
   D39        3.13560  -0.00008  -0.00052   0.00540   0.00486   3.14047
   D40        3.00843   0.00060   0.00858   0.02552   0.03406   3.04249
   D41       -1.18667   0.00046   0.00652   0.02537   0.03183  -1.15484
   D42        0.90969   0.00048   0.00716   0.02638   0.03348   0.94316
   D43        0.95561   0.00008   0.00128   0.01344   0.01473   0.97034
   D44        3.04369  -0.00007  -0.00078   0.01329   0.01250   3.05620
   D45       -1.14313  -0.00004  -0.00014   0.01429   0.01415  -1.12898
   D46       -1.09954   0.00072   0.00952   0.01663   0.02622  -1.07332
   D47        0.98854   0.00057   0.00746   0.01648   0.02399   1.01253
   D48        3.08490   0.00060   0.00810   0.01749   0.02563   3.11054
         Item               Value     Threshold  Converged?
 Maximum Force            0.024298     0.000015     NO 
 RMS     Force            0.002432     0.000010     NO 
 Maximum Displacement     0.203791     0.000060     NO 
 RMS     Displacement     0.050914     0.000040     NO 
 Predicted change in Energy=-2.014087D-03
 GradGradGradGradGradGradGradGradGradGradGradGradGradGradGradGradGradGrad

                          Input orientation:                          
 ---------------------------------------------------------------------
 Center     Atomic     Atomic              Coordinates (Angstroms)
 Number     Number      Type              X           Y           Z
 ---------------------------------------------------------------------
    1          7             0       -0.116096   -0.186765   -0.020162
    2          6             0        0.647227    0.847271   -0.681761
    3          1             0       -0.061631    1.481288   -1.228505
    4          6             0        1.413562    1.750373    0.304551
    5          1             0        1.930847    2.565664   -0.211602
    6          1             0        0.736762    2.197940    1.035493
    7          1             0        2.159021    1.163191    0.847736
    8          6             0       -1.377208    0.071849    0.640475
    9          1             0       -1.333242    1.053952    1.137117
   10          6             0       -2.545746    0.112418   -0.357738
   11          1             0       -2.654818   -0.859498   -0.845001
   12          1             0       -3.487623    0.361661    0.141038
   13          1             0       -2.373276    0.861081   -1.133870
   14          6             0        1.605332    0.228976   -1.707071
   15          1             0        1.946516    0.974307   -2.432786
   16          1             0        2.497356   -0.181424   -1.217162
   17          1             0        1.110991   -0.579787   -2.253303
   18          6             0       -1.620403   -0.975506    1.727557
   19          1             0       -2.518856   -0.742129    2.307013
   20          1             0       -1.760903   -1.969908    1.284976
   21          1             0       -0.773195   -1.025266    2.419746
   22          1             0        0.354665   -1.042354    0.199961
 ---------------------------------------------------------------------
                    Distance matrix (angstroms):
                    1          2          3          4          5
     1  N    0.000000
     2  C    1.445547   0.000000
     3  H    2.060452   1.096990   0.000000
     4  C    2.489538   1.541322   2.144496   0.000000
     5  H    3.435475   2.195815   2.485947   1.094850   0.000000
     6  H    2.743828   2.186615   2.505336   1.092085   1.765305
     7  H    2.784202   2.173635   3.056675   1.093409   1.772341
     8  C    1.446971   2.539276   2.685209   3.273940   4.229465
     9  H    2.088090   2.696904   2.719518   2.953489   3.841691
    10  C    2.471167   3.292427   2.966963   4.335625   5.106824
    11  H    2.752824   3.720646   3.514395   4.968361   5.758580
    12  H    3.419642   4.243795   3.855728   5.096751   5.860188
    13  H    2.726388   3.054183   2.395269   4.147293   4.720345
    14  C    2.445775   1.533465   2.139177   2.529436   2.793295
    15  H    3.379824   2.184120   2.395825   2.894707   2.732456
    16  H    2.874538   2.183540   3.051747   2.687390   2.979694
    17  H    2.578203   2.172859   2.583270   3.473300   3.838563
    18  C    2.437123   3.777495   4.147759   4.319757   5.376950
    19  H    3.390786   4.634981   4.845764   5.068169   6.089727
    20  H    2.754700   4.195669   4.595201   4.987881   6.036570
    21  H    2.662332   3.891445   4.483177   4.118268   5.208705
    22  H    1.001050   2.105638   2.929606   2.988566   3.958728
                    6          7          8          9         10
     6  H    0.000000
     7  H    1.768835   0.000000
     8  C    3.024099   3.706602   0.000000
     9  H    2.367267   3.505934   1.101415   0.000000
    10  C    4.131024   4.969117   1.537386   2.142719   0.000000
    11  H    4.938320   5.489050   2.169408   3.055592   1.092676
    12  H    4.692271   5.746865   2.187986   2.472408   1.094547
    13  H    4.020655   4.955779   2.182507   2.505245   1.092073
    14  C    3.486099   2.776035   3.798842   4.171955   4.366432
    15  H    3.871658   3.292819   4.615897   4.848439   5.022857
    16  H    3.719613   2.487220   4.304324   4.662860   5.124239
    17  H    4.321110   3.708475   3.871655   4.487575   4.176606
    18  C    4.013220   4.430818   1.529000   2.133021   2.527507
    19  H    4.567255   5.257591   2.177905   2.449539   2.798548
    20  H    4.865340   5.037190   2.175172   3.057529   2.765966
    21  H    3.819056   3.982267   2.175845   2.506379   3.485783
    22  H    3.368029   2.922283   2.105916   2.849876   3.171263
                   11         12         13         14         15
    11  H    0.000000
    12  H    1.776813   0.000000
    13  H    1.767230   1.765384   0.000000
    14  C    4.480716   5.419530   4.069083   0.000000
    15  H    5.201555   6.043987   4.512273   1.094800   0.000000
    16  H    5.209912   6.161138   4.981647   1.097336   1.765469
    17  H    4.030245   5.269388   3.933109   1.094002   1.773563
    18  C    2.775163   2.791338   3.482475   4.863415   5.816625
    19  H    3.157128   2.616928   3.798836   5.836510   6.734345
    20  H    2.562986   3.118713   3.773634   5.011883   6.019561
    21  H    3.771811   3.805811   4.329752   4.925559   5.911192
    22  H    3.190983   4.091199   3.583829   2.610981   3.678623
                   16         17         18         19         20
    16  H    0.000000
    17  H    1.776032   0.000000
    18  C    5.124243   4.844002   0.000000
    19  H    6.156020   5.830835   1.094282   0.000000
    20  H    5.252822   4.764413   1.097477   1.768191   0.000000
    21  H    4.963434   5.058261   1.095154   1.772064   1.776407
    22  H    2.709347   2.608545   2.497781   3.575882   2.552105
                   21         22
    21  H    0.000000
    22  H    2.489941   0.000000
 Stoichiometry    C6H15N
 Framework group  C1[X(C6H15N)]
 Deg. of freedom    60
 Full point group                 C1
 Largest Abelian subgroup         C1      NOp   1
 Largest concise Abelian subgroup C1      NOp   1
                         Standard orientation:                         
 ---------------------------------------------------------------------
 Center     Atomic     Atomic              Coordinates (Angstroms)
 Number     Number      Type              X           Y           Z
 ---------------------------------------------------------------------
    1          7             0       -0.003513   -0.023610    0.477142
    2          6             0        1.258358   -0.168799   -0.212935
    3          1             0        1.088809   -0.825877   -1.074844
    4          6             0        1.805751    1.168736   -0.748693
    5          1             0        2.726517    1.027702   -1.324014
    6          1             0        1.079414    1.658111   -1.401070
    7          1             0        2.023383    1.844089    0.083219
    8          6             0       -1.260595    0.151790   -0.217629
    9          1             0       -1.101243    0.786144   -1.103809
   10          6             0       -1.832914   -1.188393   -0.707442
   11          1             0       -2.048102   -1.836783    0.145333
   12          1             0       -2.755414   -1.043080   -1.278328
   13          1             0       -1.121175   -1.706533   -1.353648
   14          6             0        2.287794   -0.850397    0.696570
   15          1             0        3.121311   -1.260114    0.116941
   16          1             0        2.710362   -0.139276    1.417605
   17          1             0        1.823035   -1.669034    1.253950
   18          6             0       -2.258454    0.877121    0.685706
   19          1             0       -3.182257    1.109595    0.147192
   20          1             0       -2.526080    0.253993    1.548575
   21          1             0       -1.837357    1.816591    1.059118
   22          1             0        0.023743    0.209395    1.450316
 ---------------------------------------------------------------------
 Rotational constants (GHZ):      4.0608784      1.4118124      1.3042673
 Standard basis: TZVP (5D, 7F)
 There are   223 symmetry adapted basis functions of A   symmetry.
 Integral buffers will be    131072 words long.
 Raffenetti 2 integral format.
 Two-electron integral symmetry is turned on.
   223 basis functions,   365 primitive gaussians,   230 cartesian basis functions
    29 alpha electrons       29 beta electrons
       nuclear repulsion energy       333.2381720668 Hartrees.
 NAtoms=   22 NActive=   22 NUniq=   22 SFac= 7.50D-01 NAtFMM=   80 NAOKFM=F Big=F
 One-electron integrals computed using PRISM.
 NBasis=   223 RedAO= T  NBF=   223
 NBsUse=   223 1.00D-06 NBFU=   223
 Initial guess read from the read-write file:
 Initial guess orbital symmetries:
       Occupied  (A) (A) (A) (A) (A) (A) (A) (A) (A) (A) (A) (A)
                 (A) (A) (A) (A) (A) (A) (A) (A) (A) (A) (A) (A)
                 (A) (A) (A) (A) (A)
       Virtual   (A) (A) (A) (A) (A) (A) (A) (A) (A) (A) (A) (A)
                 (A) (A) (A) (A) (A) (A) (A) (A) (A) (A) (A) (A)
                 (A) (A) (A) (A) (A) (A) (A) (A) (A) (A) (A) (A)
                 (A) (A) (A) (A) (A) (A) (A) (A) (A) (A) (A) (A)
                 (A) (A) (A) (A) (A) (A) (A) (A) (A) (A) (A) (A)
                 (A) (A) (A) (A) (A) (A) (A) (A) (A) (A) (A) (A)
                 (A) (A) (A) (A) (A) (A) (A) (A) (A) (A) (A) (A)
                 (A) (A) (A) (A) (A) (A) (A) (A) (A) (A) (A) (A)
                 (A) (A) (A) (A) (A) (A) (A) (A) (A) (A) (A) (A)
                 (A) (A) (A) (A) (A) (A) (A) (A) (A) (A) (A) (A)
                 (A) (A) (A) (A) (A) (A) (A) (A) (A) (A) (A) (A)
                 (A) (A) (A) (A) (A) (A) (A) (A) (A) (A) (A) (A)
                 (A) (A) (A) (A) (A) (A) (A) (A) (A) (A) (A) (A)
                 (A) (A) (A) (A) (A) (A) (A) (A) (A) (A) (A) (A)
                 (A) (A) (A) (A) (A) (A) (A) (A) (A) (A) (A) (A)
                 (A) (A) (A) (A) (A) (A) (A) (A) (A) (A) (A) (A)
                 (A) (A)
 Harris functional with IExCor=  402 diagonalized for initial guess.
 ExpMin= 9.52D-02 ExpMax= 1.97D+04 ExpMxC= 6.73D+02 IAcc=2 IRadAn=         4 AccDes= 0.00D+00
 HarFok:  IExCor= 402 AccDes= 0.00D+00 IRadAn=         4 IDoV=1
 ScaDFX=  1.000000  1.000000  1.000000  1.000000
 Requested convergence on RMS density matrix=1.00D-08 within 128 cycles.
 Requested convergence on MAX density matrix=1.00D-06.
 Requested convergence on             energy=1.00D-06.
 No special actions if energy rises.
 Keep R1 integrals in memory in canonical form, NReq=   360237098.
 Integral accuracy reduced to 1.0D-05 until final iterations.
 Initial convergence to 1.0D-05 achieved.  Increase integral accuracy.
 SCF Done:  E(RB+HF-LYP) =  -292.526666311     A.U. after   14 cycles
             Convg  =    0.5272D-08             -V/T =  2.0057
             S**2   =   0.0000
 Range of M.O.s used for correlation:     1   223
 NBasis=   223 NAE=    29 NBE=    29 NFC=     0 NFV=     0
 NROrb=    223 NOA=    29 NOB=    29 NVA=   194 NVB=   194

 **** Warning!!: The largest alpha MO coefficient is  0.18873949D+02

 Symmetrizing basis deriv contribution to polar:
 IMax=3 JMax=2 DiffMx= 0.00D+00
 G2DrvN: will do   23 centers at a time, making    1 passes doing MaxLOS=2.
 FoFDir/FoFCou used for L=0 through L=2.
 DoAtom=TTTTTTTTTTTTTTTTTTTTTT
          Differentiating once with respect to electric field.
                with respect to dipole field.
          Differentiating once with respect to nuclear coordinates.
          Store integrals in memory, NReq=   353689553.
          There are  69 degrees of freedom in the 1st order CPHF.
    66 vectors were produced by pass  0.
 AX will form  66 AO Fock derivatives at one time.
    66 vectors were produced by pass  1.
    66 vectors were produced by pass  2.
    66 vectors were produced by pass  3.
    66 vectors were produced by pass  4.
    31 vectors were produced by pass  5.
     3 vectors were produced by pass  6.
 Inv2:  IOpt= 1 Iter= 1 AM= 3.66D-15 Conv= 1.00D-12.
 Inverted reduced A of dimension  364 with in-core refinement.
 Isotropic polarizability for W=    0.000000       83.92 Bohr**3.
 End of Minotr Frequency-dependent properties file   721 does not exist.
 ***** Axes restored to original set *****
 -------------------------------------------------------------------
 Center     Atomic                   Forces (Hartrees/Bohr)
 Number     Number              X              Y              Z
 -------------------------------------------------------------------
    1          7          -0.003859112   -0.002434738   -0.006746612
    2          6           0.002460233    0.002070869    0.001686862
    3          1          -0.000371291   -0.000761933   -0.000072242
    4          6           0.000216155    0.001368569   -0.001174335
    5          1          -0.000192591   -0.000387679   -0.000018784
    6          1           0.000014947   -0.000096862    0.000011326
    7          1          -0.000111582    0.000126440    0.000090871
    8          6          -0.000416219    0.001970249    0.002246631
    9          1           0.000119296   -0.000491595    0.000123766
   10          6          -0.000779722    0.000367045    0.000745524
   11          1          -0.000115866    0.000128818   -0.000058865
   12          1           0.000299687    0.000029231   -0.000028114
   13          1           0.000161023   -0.000228374    0.000000622
   14          6           0.000912470   -0.000902944   -0.001461205
   15          1           0.000012690   -0.000783494    0.002140402
   16          1          -0.002198728   -0.000288890   -0.000489429
   17          1           0.000464291    0.002062823    0.000200854
   18          6          -0.000469356   -0.001810106    0.001415018
   19          1           0.001235145   -0.000427401   -0.001527290
   20          1           0.000805775    0.001723481    0.000601526
   21          1          -0.001570579    0.000499945   -0.000980403
   22          1           0.003383335   -0.001733454    0.003293876
 -------------------------------------------------------------------
 Cartesian Forces:  Max     0.006746612 RMS     0.001536444

 GradGradGradGradGradGradGradGradGradGradGradGradGradGradGradGradGradGrad
 Berny optimization.
 Internal  Forces:  Max     0.003797167 RMS     0.000779038
 Search for a local minimum.
 Step number   3 out of a maximum of 118
 All quantities printed in internal units (Hartrees-Bohrs-Radians)
 Second derivative matrix not updated -- analytic derivatives used.
 Trust test= 1.00D+00 RLast= 4.60D-01 DXMaxT set to 6.00D-01
     Eigenvalues ---   -0.00375   0.00123   0.00168   0.00234   0.00270
     Eigenvalues ---    0.00317   0.00331   0.04041   0.04104   0.04409
     Eigenvalues ---    0.04424   0.04491   0.04510   0.04592   0.04614
     Eigenvalues ---    0.04634   0.04684   0.04917   0.05181   0.05343
     Eigenvalues ---    0.05423   0.11693   0.11811   0.11868   0.12237
     Eigenvalues ---    0.12378   0.12493   0.12584   0.12805   0.13301
     Eigenvalues ---    0.14098   0.14173   0.14758   0.14922   0.16723
     Eigenvalues ---    0.18414   0.18982   0.19156   0.20359   0.26021
     Eigenvalues ---    0.26694   0.28493   0.28902   0.30345   0.31539
     Eigenvalues ---    0.32394   0.32397   0.32845   0.32890   0.33008
     Eigenvalues ---    0.33056   0.33188   0.33289   0.33679   0.33722
     Eigenvalues ---    0.34027   0.34082   0.36445   0.37261   0.48482
     Eigenvalues --- 1000.000001000.000001000.000001000.000001000.00000
     Eigenvalues --- 1000.000001000.000001000.000001000.000001000.00000
     Eigenvalues --- 1000.000001000.000001000.000001000.000001000.00000
     Eigenvalues --- 1000.000001000.000001000.000001000.000001000.00000
     Eigenvalues --- 1000.000001000.000001000.000001000.000001000.00000
     Eigenvalues --- 1000.000001000.000001000.000001000.000001000.00000
     Eigenvalues --- 1000.000001000.000001000.000001000.000001000.00000
     Eigenvalues --- 1000.000001000.000001000.000001000.000001000.00000
     Eigenvalues --- 1000.000001000.000001000.000001000.000001000.00000
     Eigenvalues --- 1000.000001000.000001000.00000
 RFO step:  Lambda=-5.95251663D-03.
 Quintic linear search produced a step of  0.96312.
 Maximum step size (   0.600) exceeded in Quadratic search.
    -- Step size scaled by   0.441
 Iteration  1 RMS(Cart)=  0.08641732 RMS(Int)=  0.03957422
 Iteration  2 RMS(Cart)=  0.03870065 RMS(Int)=  0.00927723
 Iteration  3 RMS(Cart)=  0.00220737 RMS(Int)=  0.00904940
 Iteration  4 RMS(Cart)=  0.00003228 RMS(Int)=  0.00904939
 Iteration  5 RMS(Cart)=  0.00000036 RMS(Int)=  0.00904939
 Variable       Old X    -DE/DX   Delta X   Delta X   Delta X     New X
                                 (Linear)    (Quad)   (Total)
    R1        2.73169   0.00194  -0.00866   0.01298   0.00431   2.73600
    R2        2.73438   0.00210  -0.00363   0.01517   0.01155   2.74593
    R3        1.89171   0.00380   0.04005  -0.01093   0.02913   1.92084
    R4        2.07301  -0.00017   0.00191  -0.00315  -0.00125   2.07177
    R5        2.91268  -0.00013   0.00693  -0.00236   0.00457   2.91725
    R6        2.89783  -0.00081  -0.00612  -0.00136  -0.00748   2.89035
    R7        2.06897  -0.00037   0.00053  -0.00167  -0.00114   2.06783
    R8        2.06374  -0.00004  -0.00006  -0.00015  -0.00020   2.06354
    R9        2.06624  -0.00010   0.00171   0.00023   0.00194   2.06818
   R10        2.08137  -0.00038   0.00439  -0.00060   0.00379   2.08517
   R11        2.90524  -0.00008   0.00204  -0.00722  -0.00518   2.90006
   R12        2.88939  -0.00034  -0.00595   0.00170  -0.00425   2.88514
   R13        2.06486  -0.00007   0.00021  -0.00106  -0.00085   2.06400
   R14        2.06839  -0.00027   0.00077  -0.00094  -0.00016   2.06823
   R15        2.06372  -0.00013   0.00016  -0.00026  -0.00010   2.06362
   R16        2.06887  -0.00195   0.01008  -0.00658   0.00350   2.07237
   R17        2.07366  -0.00189   0.01158  -0.00707   0.00451   2.07818
   R18        2.06736  -0.00184   0.00945  -0.00752   0.00194   2.06930
   R19        2.06789  -0.00191   0.00970  -0.00692   0.00278   2.07067
   R20        2.07393  -0.00191   0.01107  -0.00818   0.00289   2.07682
   R21        2.06954  -0.00186   0.01060  -0.00598   0.00462   2.07416
    A1        2.14282  -0.00075   0.00425  -0.03240  -0.07240   2.07042
    A2        2.05296  -0.00020  -0.01651  -0.02956  -0.10184   1.95112
    A3        2.05130   0.00052  -0.02112  -0.01837  -0.09591   1.95539
    A4        1.87583  -0.00001  -0.00737  -0.00948  -0.01681   1.85901
    A5        1.97012   0.00098   0.00734   0.01601   0.02329   1.99341
    A6        1.92572  -0.00066   0.00925  -0.01504  -0.00603   1.91969
    A7        1.87714  -0.00040  -0.01414   0.00919  -0.00483   1.87230
    A8        1.87919   0.00015  -0.00023   0.00163   0.00135   1.88054
    A9        1.93207  -0.00008   0.00397  -0.00241   0.00141   1.93347
   A10        1.94932  -0.00031   0.00585  -0.00650  -0.00066   1.94866
   A11        1.93939  -0.00003  -0.00081   0.00716   0.00634   1.94573
   A12        1.92007   0.00022  -0.00072   0.00304   0.00230   1.92238
   A13        1.87880   0.00017  -0.00150  -0.00145  -0.00295   1.87585
   A14        1.88807   0.00006  -0.00080  -0.00340  -0.00420   1.88387
   A15        1.88610  -0.00011  -0.00226   0.00103  -0.00125   1.88484
   A16        1.90757   0.00004   0.00849   0.01365   0.02170   1.92927
   A17        1.95058   0.00060  -0.01642  -0.01260  -0.02904   1.92154
   A18        1.91857  -0.00027   0.01178  -0.00222   0.00948   1.92805
   A19        1.87505  -0.00022  -0.01438   0.00470  -0.00959   1.86547
   A20        1.87188   0.00020   0.00375  -0.00145   0.00210   1.87397
   A21        1.93779  -0.00036   0.00733  -0.00112   0.00635   1.94414
   A22        1.91978   0.00028  -0.00313   0.00207  -0.00108   1.91870
   A23        1.94357  -0.00016   0.00459  -0.00472  -0.00013   1.94343
   A24        1.93853  -0.00015  -0.00453   0.00040  -0.00415   1.93438
   A25        1.89638  -0.00001   0.00327   0.00200   0.00527   1.90165
   A26        1.88454  -0.00011  -0.00106  -0.00081  -0.00190   1.88263
   A27        1.87932   0.00015   0.00098   0.00118   0.00216   1.88148
   A28        1.94274  -0.00055   0.00680  -0.00406   0.00273   1.94547
   A29        1.93926  -0.00029   0.00644  -0.00438   0.00204   1.94130
   A30        1.92793   0.00012   0.00236  -0.00467  -0.00233   1.92560
   A31        1.87258   0.00040  -0.00925   0.00485  -0.00441   1.86817
   A32        1.88929   0.00025  -0.00251   0.00627   0.00375   1.89304
   A33        1.88993   0.00011  -0.00456   0.00269  -0.00188   1.88805
   A34        1.94012  -0.00038   0.00644  -0.00483   0.00159   1.94172
   A35        1.93297  -0.00023   0.00478  -0.00351   0.00125   1.93422
   A36        1.93633  -0.00006   0.00761  -0.00053   0.00705   1.94338
   A37        1.87724   0.00029  -0.00755   0.00646  -0.00110   1.87614
   A38        1.88616   0.00026  -0.00695  -0.00002  -0.00700   1.87916
   A39        1.88889   0.00016  -0.00521   0.00289  -0.00235   1.88654
    D1       -0.72272  -0.00091  -0.09936  -0.12515  -0.21716  -0.93987
    D2        1.34422  -0.00085  -0.11729  -0.11059  -0.22067   1.12354
    D3       -2.76707  -0.00073  -0.09990  -0.11344  -0.20606  -2.97314
    D4        2.71168   0.00069   0.12645   0.19581   0.31507   3.02675
    D5       -1.50457   0.00076   0.10853   0.21037   0.31156  -1.19301
    D6        0.66733   0.00087   0.12591   0.20752   0.32616   0.99349
    D7       -0.65068   0.00063   0.09037   0.09408   0.17797  -0.47271
    D8        1.42251   0.00075   0.06775   0.10096   0.16184   1.58435
    D9       -2.70074   0.00051   0.07428   0.08907   0.15640  -2.54434
   D10        2.19837  -0.00109  -0.13509  -0.22835  -0.35639   1.84198
   D11       -2.01163  -0.00097  -0.15772  -0.22147  -0.37252  -2.38414
   D12        0.14831  -0.00120  -0.15119  -0.23336  -0.37795  -0.22964
   D13       -3.07579  -0.00018   0.01104  -0.00577   0.00532  -3.07046
   D14       -0.97751  -0.00019   0.01255  -0.00712   0.00547  -0.97205
   D15        1.11050  -0.00020   0.00873   0.00071   0.00950   1.12000
   D16       -1.00962   0.00012  -0.00294  -0.00209  -0.00502  -1.01463
   D17        1.08866   0.00011  -0.00143  -0.00344  -0.00487   1.08379
   D18       -3.10651   0.00010  -0.00525   0.00439  -0.00084  -3.10736
   D19        1.03898   0.00002  -0.00937   0.00396  -0.00546   1.03352
   D20        3.13725   0.00001  -0.00786   0.00260  -0.00532   3.13193
   D21       -1.05792   0.00000  -0.01168   0.01044  -0.00129  -1.05921
   D22        2.81951   0.00042   0.04500   0.01012   0.05513   2.87464
   D23       -1.37779   0.00037   0.04211   0.01062   0.05274  -1.32505
   D24        0.72012   0.00039   0.04214   0.00802   0.05016   0.77028
   D25        0.77723   0.00070   0.04891   0.02876   0.07768   0.85491
   D26        2.86312   0.00065   0.04601   0.02927   0.07529   2.93840
   D27       -1.32216   0.00067   0.04604   0.02667   0.07271  -1.24945
   D28       -1.27010   0.00114   0.06386   0.01807   0.08192  -1.18819
   D29        0.81578   0.00110   0.06097   0.01857   0.07953   0.89531
   D30        2.91369   0.00111   0.06100   0.01597   0.07696   2.99065
   D31        1.09168  -0.00012   0.00727  -0.00578   0.00135   1.09302
   D32       -3.08812  -0.00005   0.01229  -0.00497   0.00717  -3.08095
   D33       -0.99365  -0.00006   0.01356  -0.00638   0.00702  -0.98663
   D34       -3.09911   0.00014  -0.00171   0.00655   0.00504  -3.09407
   D35       -0.99572   0.00021   0.00331   0.00736   0.01086  -0.98486
   D36        1.09875   0.00020   0.00458   0.00595   0.01071   1.10946
   D37       -1.05739   0.00005  -0.00161   0.00696   0.00533  -1.05206
   D38        1.04600   0.00012   0.00341   0.00778   0.01115   1.05716
   D39        3.14047   0.00011   0.00468   0.00637   0.01101  -3.13171
   D40        3.04249   0.00025   0.03280   0.02204   0.05482   3.09731
   D41       -1.15484   0.00021   0.03066   0.02468   0.05531  -1.09953
   D42        0.94316   0.00022   0.03224   0.02564   0.05786   1.00103
   D43        0.97034   0.00023   0.01419   0.00775   0.02198   0.99232
   D44        3.05620   0.00019   0.01204   0.01039   0.02246   3.07866
   D45       -1.12898   0.00020   0.01363   0.01135   0.02502  -1.10397
   D46       -1.07332   0.00058   0.02525   0.00357   0.02881  -1.04452
   D47        1.01253   0.00054   0.02310   0.00621   0.02929   1.04182
   D48        3.11054   0.00055   0.02469   0.00717   0.03185  -3.14080
         Item               Value     Threshold  Converged?
 Maximum Force            0.003797     0.000015     NO 
 RMS     Force            0.000779     0.000010     NO 
 Maximum Displacement     0.318664     0.000060     NO 
 RMS     Displacement     0.103093     0.000040     NO 
 Predicted change in Energy=-4.992305D-03
 GradGradGradGradGradGradGradGradGradGradGradGradGradGradGradGradGradGrad

                          Input orientation:                          
 ---------------------------------------------------------------------
 Center     Atomic     Atomic              Coordinates (Angstroms)
 Number     Number      Type              X           Y           Z
 ---------------------------------------------------------------------
    1          7             0       -0.171052   -0.275056   -0.186394
    2          6             0        0.627152    0.799038   -0.739028
    3          1             0       -0.058197    1.432291   -1.314552
    4          6             0        1.300576    1.697250    0.320617
    5          1             0        1.832956    2.535094   -0.139785
    6          1             0        0.568133    2.115444    1.014196
    7          1             0        2.023800    1.116946    0.901980
    8          6             0       -1.349915    0.063499    0.592776
    9          1             0       -1.232668    1.055752    1.060992
   10          6             0       -2.580429    0.144307   -0.320701
   11          1             0       -2.771719   -0.830437   -0.774831
   12          1             0       -3.469429    0.458171    0.235187
   13          1             0       -2.419362    0.863531   -1.126483
   14          6             0        1.665084    0.233180   -1.709539
   15          1             0        2.096628    1.020326   -2.339473
   16          1             0        2.498033   -0.240639   -1.170016
   17          1             0        1.207223   -0.519440   -2.359932
   18          6             0       -1.556141   -0.949268    1.716495
   19          1             0       -2.416397   -0.681080    2.339961
   20          1             0       -1.743589   -1.952468    1.308730
   21          1             0       -0.675987   -1.005906    2.369828
   22          1             0        0.404583   -0.973202    0.276675
 ---------------------------------------------------------------------
                    Distance matrix (angstroms):
                    1          2          3          4          5
     1  N    0.000000
     2  C    1.447830   0.000000
     3  H    2.049515   1.096331   0.000000
     4  C    2.512517   1.543740   2.142486   0.000000
     5  H    3.451835   2.197031   2.484494   1.094249   0.000000
     6  H    2.775302   2.193218   2.506403   1.091976   1.762826
     7  H    2.817730   2.178210   3.057314   1.094435   1.769983
     8  C    1.453081   2.494697   2.679558   3.125431   4.095863
     9  H    2.110462   2.600943   2.676635   2.716064   3.609483
    10  C    2.449286   3.300340   3.001382   4.229081   5.022605
    11  H    2.723633   3.769456   3.574135   4.916584   5.738738
    12  H    3.405091   4.224602   3.871318   4.929054   5.706970
    13  H    2.689804   3.071730   2.435971   4.077637   4.674388
    14  C    2.439194   1.529507   2.136254   2.529407   2.791258
    15  H    3.384692   2.183977   2.421457   2.857972   2.683780
    16  H    2.844769   2.183318   3.058415   2.722371   3.034535
    17  H    2.585272   2.168455   2.550169   3.479622   3.827633
    18  C    2.448270   3.721954   4.135567   4.136831   5.203128
    19  H    3.404247   4.575381   4.835588   4.852844   5.877917
    20  H    2.742623   4.169474   4.602038   4.854251   5.918453
    21  H    2.706173   3.823739   4.461068   3.925955   5.013146
    22  H    1.016463   2.054756   2.921056   2.817099   3.810752
                    6          7          8          9         10
     6  H    0.000000
     7  H    1.768773   0.000000
     8  C    2.840244   3.547861   0.000000
     9  H    2.089981   3.260922   1.103422   0.000000
    10  C    3.947249   4.862088   1.534645   2.134542   0.000000
    11  H    4.799318   5.440681   2.165871   3.049039   1.092224
    12  H    4.433432   5.572627   2.185401   2.458081   1.094460
    13  H    3.882643   4.890866   2.177067   2.496045   1.092021
    14  C    3.487830   2.780243   3.797324   4.092607   4.467791
    15  H    3.844825   3.243711   4.625178   4.759058   5.168918
    16  H    3.747857   2.522123   4.243424   4.536095   5.163361
    17  H    4.328486   3.739603   3.949336   4.487429   4.352623
    18  C    3.794500   4.212916   1.526752   2.134110   2.528882
    19  H    4.299490   5.001603   2.178173   2.460399   2.790572
    20  H    4.688147   4.876471   2.175245   3.061340   2.784208
    21  H    3.623314   3.734960   2.180762   2.504672   3.491252
    22  H    3.179689   2.716908   2.062264   2.722572   3.242836
                   11         12         13         14         15
    11  H    0.000000
    12  H    1.779733   0.000000
    13  H    1.765600   1.766664   0.000000
    14  C    4.657272   5.495072   4.173727   0.000000
    15  H    5.438220   6.158400   4.678685   1.096653   0.000000
    16  H    5.317361   6.170376   5.040026   1.099724   1.766009
    17  H    4.294327   5.437043   4.072606   1.095027   1.778297
    18  C    2.774610   2.799256   3.480505   4.848937   5.802836
    19  H    3.138550   2.614736   3.795005   5.821753   6.720066
    20  H    2.580162   3.153126   3.783753   5.050352   6.074056
    21  H    3.783090   3.808351   4.331090   4.863865   5.828424
    22  H    3.348872   4.130197   3.649261   2.643722   3.698838
                   16         17         18         19         20
    16  H    0.000000
    17  H    1.777588   0.000000
    18  C    5.026971   4.943500   0.000000
    19  H    6.055209   5.936812   1.095753   0.000000
    20  H    5.202490   4.921376   1.099008   1.769897   0.000000
    21  H    4.815655   5.114074   1.097599   1.770715   1.778112
    22  H    2.648036   2.793175   2.432714   3.507195   2.576576
                   21         22
    21  H    0.000000
    22  H    2.355842   0.000000
 Stoichiometry    C6H15N
 Framework group  C1[X(C6H15N)]
 Deg. of freedom    60
 Full point group                 C1
 Largest Abelian subgroup         C1      NOp   1
 Largest concise Abelian subgroup C1      NOp   1
                         Standard orientation:                         
 ---------------------------------------------------------------------
 Center     Atomic     Atomic              Coordinates (Angstroms)
 Number     Number      Type              X           Y           Z
 ---------------------------------------------------------------------
    1          7             0       -0.003574   -0.170472   -0.531315
    2          6             0       -1.248477   -0.198471    0.207362
    3          1             0       -1.101998   -0.898261    1.038493
    4          6             0       -1.653024    1.160388    0.818080
    5          1             0       -2.559503    1.076288    1.425207
    6          1             0       -0.865027    1.561222    1.459021
    7          1             0       -1.845668    1.888214    0.023759
    8          6             0        1.225744    0.119852    0.186970
    9          1             0        1.017125    0.736405    1.077970
   10          6             0        1.865010   -1.182936    0.686188
   11          1             0        2.137305   -1.813408   -0.163114
   12          1             0        2.760637   -0.984146    1.282994
   13          1             0        1.166138   -1.744381    1.309779
   14          6             0       -2.368180   -0.751361   -0.675796
   15          1             0       -3.244510   -1.036485   -0.081323
   16          1             0       -2.704872   -0.002481   -1.407376
   17          1             0       -2.019820   -1.632552   -1.224642
   18          6             0        2.187696    0.908665   -0.698126
   19          1             0        3.101388    1.173389   -0.154287
   20          1             0        2.485037    0.317577   -1.575636
   21          1             0        1.730064    1.840637   -1.054111
   22          1             0       -0.083891    0.374460   -1.385596
 ---------------------------------------------------------------------
 Rotational constants (GHZ):      4.0664091      1.4333522      1.3328240
 Standard basis: TZVP (5D, 7F)
 There are   223 symmetry adapted basis functions of A   symmetry.
 Integral buffers will be    131072 words long.
 Raffenetti 2 integral format.
 Two-electron integral symmetry is turned on.
   223 basis functions,   365 primitive gaussians,   230 cartesian basis functions
    29 alpha electrons       29 beta electrons
       nuclear repulsion energy       334.4736878374 Hartrees.
 NAtoms=   22 NActive=   22 NUniq=   22 SFac= 7.50D-01 NAtFMM=   80 NAOKFM=F Big=F
 One-electron integrals computed using PRISM.
 NBasis=   223 RedAO= T  NBF=   223
 NBsUse=   223 1.00D-06 NBFU=   223
 Initial guess read from the read-write file:
 Initial guess orbital symmetries:
       Occupied  (A) (A) (A) (A) (A) (A) (A) (A) (A) (A) (A) (A)
                 (A) (A) (A) (A) (A) (A) (A) (A) (A) (A) (A) (A)
                 (A) (A) (A) (A) (A)
       Virtual   (A) (A) (A) (A) (A) (A) (A) (A) (A) (A) (A) (A)
                 (A) (A) (A) (A) (A) (A) (A) (A) (A) (A) (A) (A)
                 (A) (A) (A) (A) (A) (A) (A) (A) (A) (A) (A) (A)
                 (A) (A) (A) (A) (A) (A) (A) (A) (A) (A) (A) (A)
                 (A) (A) (A) (A) (A) (A) (A) (A) (A) (A) (A) (A)
                 (A) (A) (A) (A) (A) (A) (A) (A) (A) (A) (A) (A)
                 (A) (A) (A) (A) (A) (A) (A) (A) (A) (A) (A) (A)
                 (A) (A) (A) (A) (A) (A) (A) (A) (A) (A) (A) (A)
                 (A) (A) (A) (A) (A) (A) (A) (A) (A) (A) (A) (A)
                 (A) (A) (A) (A) (A) (A) (A) (A) (A) (A) (A) (A)
                 (A) (A) (A) (A) (A) (A) (A) (A) (A) (A) (A) (A)
                 (A) (A) (A) (A) (A) (A) (A) (A) (A) (A) (A) (A)
                 (A) (A) (A) (A) (A) (A) (A) (A) (A) (A) (A) (A)
                 (A) (A) (A) (A) (A) (A) (A) (A) (A) (A) (A) (A)
                 (A) (A) (A) (A) (A) (A) (A) (A) (A) (A) (A) (A)
                 (A) (A) (A) (A) (A) (A) (A) (A) (A) (A) (A) (A)
                 (A) (A)
 Harris functional with IExCor=  402 diagonalized for initial guess.
 ExpMin= 9.52D-02 ExpMax= 1.97D+04 ExpMxC= 6.73D+02 IAcc=2 IRadAn=         4 AccDes= 0.00D+00
 HarFok:  IExCor= 402 AccDes= 0.00D+00 IRadAn=         4 IDoV=1
 ScaDFX=  1.000000  1.000000  1.000000  1.000000
 Requested convergence on RMS density matrix=1.00D-08 within 128 cycles.
 Requested convergence on MAX density matrix=1.00D-06.
 Requested convergence on             energy=1.00D-06.
 No special actions if energy rises.
 Keep R1 integrals in memory in canonical form, NReq=   360237098.
 Integral accuracy reduced to 1.0D-05 until final iterations.
 Initial convergence to 1.0D-05 achieved.  Increase integral accuracy.
 SCF Done:  E(RB+HF-LYP) =  -292.530199934     A.U. after   15 cycles
             Convg  =    0.2899D-08             -V/T =  2.0057
             S**2   =   0.0000
 Range of M.O.s used for correlation:     1   223
 NBasis=   223 NAE=    29 NBE=    29 NFC=     0 NFV=     0
 NROrb=    223 NOA=    29 NOB=    29 NVA=   194 NVB=   194

 **** Warning!!: The largest alpha MO coefficient is  0.18023578D+02

 Symmetrizing basis deriv contribution to polar:
 IMax=3 JMax=2 DiffMx= 0.00D+00
 G2DrvN: will do   23 centers at a time, making    1 passes doing MaxLOS=2.
 FoFDir/FoFCou used for L=0 through L=2.
 DoAtom=TTTTTTTTTTTTTTTTTTTTTT
          Differentiating once with respect to electric field.
                with respect to dipole field.
          Differentiating once with respect to nuclear coordinates.
          Store integrals in memory, NReq=   353689553.
          There are  69 degrees of freedom in the 1st order CPHF.
    66 vectors were produced by pass  0.
 AX will form  66 AO Fock derivatives at one time.
    66 vectors were produced by pass  1.
    66 vectors were produced by pass  2.
    66 vectors were produced by pass  3.
    66 vectors were produced by pass  4.
    32 vectors were produced by pass  5.
     3 vectors were produced by pass  6.
     1 vectors were produced by pass  7.
 Inv2:  IOpt= 1 Iter= 1 AM= 2.64D-15 Conv= 1.00D-12.
 Inverted reduced A of dimension  366 with in-core refinement.
 Isotropic polarizability for W=    0.000000       83.62 Bohr**3.
 End of Minotr Frequency-dependent properties file   721 does not exist.
 ***** Axes restored to original set *****
 -------------------------------------------------------------------
 Center     Atomic                   Forces (Hartrees/Bohr)
 Number     Number              X              Y              Z
 -------------------------------------------------------------------
    1          7           0.004088937   -0.014063437    0.000531298
    2          6           0.003406911    0.009412379   -0.001656224
    3          1           0.000075329   -0.000422228   -0.000606844
    4          6           0.000528294   -0.000464192   -0.000668751
    5          1          -0.000386132   -0.000864713   -0.000309052
    6          1           0.000734721    0.000192747   -0.000192817
    7          1           0.000070010    0.000262805   -0.000015877
    8          6          -0.006298560    0.005531344    0.002844186
    9          1           0.000193894   -0.002241274    0.000373407
   10          6          -0.000547184   -0.000064706    0.000846096
   11          1          -0.000420656    0.000138211   -0.000065172
   12          1           0.000488606   -0.000209506   -0.000200780
   13          1          -0.000070436   -0.000165640   -0.000009328
   14          6           0.002550548   -0.001857285   -0.002446497
   15          1          -0.001172411   -0.001550069    0.002449295
   16          1          -0.003186924    0.000415962   -0.000996965
   17          1           0.000976389    0.002326061    0.001146455
   18          6          -0.001251286   -0.003906707    0.002177751
   19          1           0.001915936   -0.000307255   -0.002115513
   20          1           0.001158946    0.002833194    0.000738372
   21          1          -0.002131708    0.000626101   -0.001693567
   22          1          -0.000723225    0.004378209   -0.000129471
 -------------------------------------------------------------------
 Cartesian Forces:  Max     0.014063437 RMS     0.002801487

 GradGradGradGradGradGradGradGradGradGradGradGradGradGradGradGradGradGrad
 Berny optimization.
 Internal  Forces:  Max     0.008762780 RMS     0.001519296
 Search for a local minimum.
 Step number   4 out of a maximum of 118
 All quantities printed in internal units (Hartrees-Bohrs-Radians)
 Second derivative matrix not updated -- analytic derivatives used.
 Trust test= 7.08D-01 RLast= 1.01D+00 DXMaxT set to 6.00D-01
     Eigenvalues ---   -0.00057   0.00171   0.00234   0.00248   0.00300
     Eigenvalues ---    0.00312   0.01289   0.03904   0.04100   0.04378
     Eigenvalues ---    0.04405   0.04480   0.04495   0.04573   0.04605
     Eigenvalues ---    0.04618   0.04661   0.04880   0.05215   0.05458
     Eigenvalues ---    0.05521   0.11313   0.11733   0.11912   0.12128
     Eigenvalues ---    0.12396   0.12568   0.12742   0.12827   0.13236
     Eigenvalues ---    0.14035   0.14259   0.14694   0.14886   0.18341
     Eigenvalues ---    0.18645   0.19112   0.20140   0.24085   0.25874
     Eigenvalues ---    0.27281   0.28755   0.29079   0.30376   0.31921
     Eigenvalues ---    0.32105   0.32132   0.32481   0.32729   0.32871
     Eigenvalues ---    0.33041   0.33152   0.33346   0.33365   0.33492
     Eigenvalues ---    0.34119   0.34161   0.36031   0.38858   0.43395
     Eigenvalues --- 1000.000001000.000001000.000001000.000001000.00000
     Eigenvalues --- 1000.000001000.000001000.000001000.000001000.00000
     Eigenvalues --- 1000.000001000.000001000.000001000.000001000.00000
     Eigenvalues --- 1000.000001000.000001000.000001000.000001000.00000
     Eigenvalues --- 1000.000001000.000001000.000001000.000001000.00000
     Eigenvalues --- 1000.000001000.000001000.000001000.000001000.00000
     Eigenvalues --- 1000.000001000.000001000.000001000.000001000.00000
     Eigenvalues --- 1000.000001000.000001000.000001000.000001000.00000
     Eigenvalues --- 1000.000001000.000001000.000001000.000001000.00000
     Eigenvalues --- 1000.000001000.000001000.00000
 RFO step:  Lambda=-2.66307639D-03.
 Quintic linear search produced a step of  0.08400.
 Maximum step size (   0.600) exceeded in Quadratic search.
    -- Step size scaled by   0.809
 Iteration  1 RMS(Cart)=  0.10156115 RMS(Int)=  0.01041267
 Iteration  2 RMS(Cart)=  0.01699543 RMS(Int)=  0.00094576
 Iteration  3 RMS(Cart)=  0.00021450 RMS(Int)=  0.00093114
 Iteration  4 RMS(Cart)=  0.00000052 RMS(Int)=  0.00093114
 Variable       Old X    -DE/DX   Delta X   Delta X   Delta X     New X
                                 (Linear)    (Quad)   (Total)
    R1        2.73600   0.00876   0.00036   0.02592   0.02628   2.76228
    R2        2.74593   0.00773   0.00097   0.01843   0.01940   2.76533
    R3        1.92084  -0.00348   0.00245  -0.00631  -0.00387   1.91697
    R4        2.07177   0.00003  -0.00010  -0.00261  -0.00272   2.06905
    R5        2.91725  -0.00091   0.00038  -0.00898  -0.00860   2.90865
    R6        2.89035  -0.00042  -0.00063   0.00010  -0.00053   2.88982
    R7        2.06783  -0.00072  -0.00010  -0.00170  -0.00180   2.06603
    R8        2.06354  -0.00054  -0.00002  -0.00097  -0.00098   2.06255
    R9        2.06818  -0.00010   0.00016  -0.00006   0.00010   2.06829
   R10        2.08517  -0.00184   0.00032  -0.00131  -0.00099   2.08417
   R11        2.90006   0.00009  -0.00044  -0.00485  -0.00529   2.89477
   R12        2.88514  -0.00012  -0.00036   0.00051   0.00015   2.88529
   R13        2.06400  -0.00003  -0.00007  -0.00035  -0.00042   2.06359
   R14        2.06823  -0.00056  -0.00001  -0.00222  -0.00224   2.06599
   R15        2.06362  -0.00011  -0.00001  -0.00018  -0.00019   2.06343
   R16        2.07237  -0.00298   0.00029  -0.00707  -0.00678   2.06559
   R17        2.07818  -0.00308   0.00038  -0.00785  -0.00747   2.07071
   R18        2.06930  -0.00269   0.00016  -0.00729  -0.00712   2.06218
   R19        2.07067  -0.00278   0.00023  -0.00724  -0.00701   2.06367
   R20        2.07682  -0.00306   0.00024  -0.00914  -0.00889   2.06793
   R21        2.07416  -0.00275   0.00039  -0.00620  -0.00581   2.06835
    A1        2.07042   0.00242  -0.00608  -0.00293  -0.01328   2.05714
    A2        1.95112  -0.00165  -0.00855  -0.01762  -0.03186   1.91925
    A3        1.95539  -0.00031  -0.00806  -0.01081  -0.02478   1.93061
    A4        1.85901   0.00030  -0.00141   0.00422   0.00274   1.86175
    A5        1.99341   0.00191   0.00196   0.00259   0.00449   1.99790
    A6        1.91969  -0.00166  -0.00051  -0.01494  -0.01546   1.90423
    A7        1.87230   0.00009  -0.00041   0.01032   0.00990   1.88220
    A8        1.88054   0.00017   0.00011  -0.00078  -0.00068   1.87986
    A9        1.93347  -0.00078   0.00012  -0.00058  -0.00047   1.93300
   A10        1.94866  -0.00124  -0.00006  -0.00920  -0.00924   1.93941
   A11        1.94573   0.00097   0.00053   0.00653   0.00705   1.95277
   A12        1.92238   0.00036   0.00019   0.00403   0.00420   1.92657
   A13        1.87585   0.00008  -0.00025   0.00035   0.00012   1.87597
   A14        1.88387   0.00017  -0.00035  -0.00216  -0.00252   1.88135
   A15        1.88484  -0.00034  -0.00011   0.00039   0.00024   1.88509
   A16        1.92927   0.00013   0.00182   0.01537   0.01714   1.94641
   A17        1.92154   0.00114  -0.00244   0.00359   0.00091   1.92245
   A18        1.92805  -0.00073   0.00080  -0.02132  -0.02057   1.90748
   A19        1.86547   0.00009  -0.00081   0.00913   0.00828   1.87375
   A20        1.87397   0.00029   0.00018   0.00163   0.00191   1.87588
   A21        1.94414  -0.00092   0.00053  -0.00709  -0.00666   1.93748
   A22        1.91870   0.00061  -0.00009   0.00348   0.00336   1.92206
   A23        1.94343  -0.00028  -0.00001  -0.00897  -0.00897   1.93446
   A24        1.93438   0.00010  -0.00035   0.01055   0.01018   1.94457
   A25        1.90165  -0.00024   0.00044  -0.00091  -0.00047   1.90118
   A26        1.88263  -0.00026  -0.00016   0.00069   0.00047   1.88311
   A27        1.88148   0.00005   0.00018  -0.00484  -0.00463   1.87685
   A28        1.94547  -0.00088   0.00023  -0.00434  -0.00412   1.94136
   A29        1.94130  -0.00071   0.00017  -0.00749  -0.00733   1.93398
   A30        1.92560   0.00028  -0.00020   0.00042   0.00021   1.92582
   A31        1.86817   0.00089  -0.00037   0.00719   0.00680   1.87497
   A32        1.89304   0.00034   0.00031   0.00505   0.00537   1.89841
   A33        1.88805   0.00015  -0.00016  -0.00028  -0.00045   1.88760
   A34        1.94172  -0.00071   0.00013  -0.00678  -0.00665   1.93506
   A35        1.93422  -0.00038   0.00010  -0.00377  -0.00367   1.93055
   A36        1.94338  -0.00036   0.00059  -0.00176  -0.00118   1.94220
   A37        1.87614   0.00065  -0.00009   0.00972   0.00962   1.88576
   A38        1.87916   0.00055  -0.00059   0.00131   0.00071   1.87987
   A39        1.88654   0.00034  -0.00020   0.00203   0.00183   1.88836
    D1       -0.93987   0.00019  -0.01824   0.02303   0.00568  -0.93420
    D2        1.12354   0.00160  -0.01854   0.04014   0.02250   1.14604
    D3       -2.97314   0.00067  -0.01731   0.02927   0.01285  -2.96029
    D4        3.02675  -0.00003   0.02647   0.06244   0.08802   3.11477
    D5       -1.19301   0.00138   0.02617   0.07955   0.10484  -1.08818
    D6        0.99349   0.00046   0.02740   0.06868   0.09519   1.08868
    D7       -0.47271  -0.00078   0.01495  -0.19979  -0.18562  -0.65834
    D8        1.58435   0.00012   0.01359  -0.17692  -0.16405   1.42030
    D9       -2.54434  -0.00076   0.01314  -0.19804  -0.18558  -2.72991
   D10        1.84198  -0.00115  -0.02994  -0.24224  -0.27150   1.57048
   D11       -2.38414  -0.00025  -0.03129  -0.21938  -0.24993  -2.63407
   D12       -0.22964  -0.00113  -0.03175  -0.24049  -0.27146  -0.50110
   D13       -3.07046  -0.00112   0.00045  -0.01629  -0.01586  -3.08632
   D14       -0.97205  -0.00120   0.00046  -0.01767  -0.01724  -0.98929
   D15        1.12000  -0.00076   0.00080  -0.01027  -0.00948   1.11052
   D16       -1.01463   0.00043  -0.00042  -0.00257  -0.00298  -1.01761
   D17        1.08379   0.00035  -0.00041  -0.00395  -0.00437   1.07942
   D18       -3.10736   0.00079  -0.00007   0.00345   0.00340  -3.10396
   D19        1.03352   0.00026  -0.00046   0.00224   0.00179   1.03531
   D20        3.13193   0.00018  -0.00045   0.00086   0.00041   3.13234
   D21       -1.05921   0.00062  -0.00011   0.00826   0.00817  -1.05103
   D22        2.87464   0.00016   0.00463   0.08090   0.08552   2.96016
   D23       -1.32505   0.00022   0.00443   0.08208   0.08650  -1.23855
   D24        0.77028   0.00013   0.00421   0.07712   0.08133   0.85161
   D25        0.85491   0.00059   0.00652   0.08425   0.09076   0.94567
   D26        2.93840   0.00065   0.00632   0.08543   0.09175   3.03015
   D27       -1.24945   0.00055   0.00611   0.08047   0.08657  -1.16287
   D28       -1.18819   0.00082   0.00688   0.07260   0.07950  -1.10869
   D29        0.89531   0.00088   0.00668   0.07378   0.08048   0.97579
   D30        2.99065   0.00078   0.00646   0.06882   0.07531   3.06595
   D31        1.09302  -0.00043   0.00011  -0.01075  -0.01064   1.08238
   D32       -3.08095  -0.00050   0.00060  -0.01544  -0.01486  -3.09580
   D33       -0.98663  -0.00056   0.00059  -0.02044  -0.01990  -1.00653
   D34       -3.09407   0.00043   0.00042   0.01526   0.01571  -3.07836
   D35       -0.98486   0.00036   0.00091   0.01056   0.01150  -0.97336
   D36        1.10946   0.00030   0.00090   0.00556   0.00646   1.11591
   D37       -1.05206   0.00033   0.00045   0.01882   0.01929  -1.03277
   D38        1.05716   0.00026   0.00094   0.01412   0.01508   1.07223
   D39       -3.13171   0.00020   0.00092   0.00912   0.01004  -3.12167
   D40        3.09731   0.00008   0.00461   0.02706   0.03162   3.12893
   D41       -1.09953   0.00018   0.00465   0.03233   0.03692  -1.06261
   D42        1.00103   0.00011   0.00486   0.03117   0.03598   1.03701
   D43        0.99232   0.00016   0.00185   0.01981   0.02164   1.01396
   D44        3.07866   0.00027   0.00189   0.02508   0.02695   3.10561
   D45       -1.10397   0.00019   0.00210   0.02392   0.02601  -1.07796
   D46       -1.04452   0.00038   0.00242   0.01170   0.01419  -1.03033
   D47        1.04182   0.00049   0.00246   0.01697   0.01949   1.06131
   D48       -3.14080   0.00041   0.00268   0.01581   0.01855  -3.12226
         Item               Value     Threshold  Converged?
 Maximum Force            0.008763     0.000015     NO 
 RMS     Force            0.001519     0.000010     NO 
 Maximum Displacement     0.327883     0.000060     NO 
 RMS     Displacement     0.112956     0.000040     NO 
 Predicted change in Energy=-2.030277D-03
 GradGradGradGradGradGradGradGradGradGradGradGradGradGradGradGradGradGrad

                          Input orientation:                          
 ---------------------------------------------------------------------
 Center     Atomic     Atomic              Coordinates (Angstroms)
 Number     Number      Type              X           Y           Z
 ---------------------------------------------------------------------
    1          7             0       -0.127068   -0.303806   -0.108887
    2          6             0        0.614074    0.782367   -0.747331
    3          1             0       -0.106379    1.339342   -1.355211
    4          6             0        1.267330    1.771667    0.234323
    5          1             0        1.758382    2.589836   -0.299312
    6          1             0        0.535848    2.214776    0.912456
    7          1             0        2.025397    1.264177    0.839052
    8          6             0       -1.325578    0.042989    0.655769
    9          1             0       -1.193716    0.988599    1.207871
   10          6             0       -2.518399    0.227057   -0.287550
   11          1             0       -2.730025   -0.706890   -0.812361
   12          1             0       -3.409669    0.531843    0.267426
   13          1             0       -2.318925    0.995433   -1.037284
   14          6             0        1.658658    0.187529   -1.692605
   15          1             0        2.107258    0.959573   -2.323079
   16          1             0        2.469107   -0.287061   -1.128109
   17          1             0        1.202963   -0.568633   -2.334012
   18          6             0       -1.603480   -1.052527    1.682333
   19          1             0       -2.487339   -0.813022    2.277305
   20          1             0       -1.779376   -2.011129    1.184699
   21          1             0       -0.761553   -1.174378    2.371026
   22          1             0        0.501775   -0.870409    0.450183
 ---------------------------------------------------------------------
                    Distance matrix (angstroms):
                    1          2          3          4          5
     1  N    0.000000
     2  C    1.461736   0.000000
     3  H    2.062447   1.094894   0.000000
     4  C    2.523832   1.539189   2.144900   0.000000
     5  H    3.458952   2.185660   2.481127   1.093297   0.000000
     6  H    2.797473   2.193812   2.514191   1.091456   1.761716
     7  H    2.826706   2.177289   3.060214   1.094491   1.767637
     8  C    1.463350   2.505518   2.685334   3.144697   4.112107
     9  H    2.131173   2.670852   2.806192   2.760025   3.681093
    10  C    2.456054   3.214367   2.862677   4.121882   4.886074
    11  H    2.726304   3.661299   3.371241   4.818468   5.592622
    12  H    3.408136   4.157283   3.767855   4.838655   5.591537
    13  H    2.711858   2.954987   2.261573   3.883393   4.439725
    14  C    2.436881   1.529226   2.134447   2.525011   2.778901
    15  H    3.389836   2.178068   2.445645   2.811632   2.622042
    16  H    2.789125   2.174814   3.054487   2.745697   3.077104
    17  H    2.605820   2.165536   2.512528   3.475269   3.797950
    18  C    2.439025   3.766649   4.145964   4.279527   5.338149
    19  H    3.394715   4.616541   4.847351   4.995191   6.020344
    20  H    2.705261   4.155112   4.525010   4.949260   5.990567
    21  H    2.703782   3.930057   4.542344   4.166659   5.258335
    22  H    1.014417   2.044094   2.917585   2.759209   3.756874
                    6          7          8          9         10
     6  H    0.000000
     7  H    1.768554   0.000000
     8  C    2.871839   3.571265   0.000000
     9  H    2.140601   3.251870   1.102897   0.000000
    10  C    3.836596   4.794887   1.531847   2.137993   0.000000
    11  H    4.709252   5.406136   2.165686   3.052256   1.092003
    12  H    4.337676   5.513893   2.175597   2.450207   1.093277
    13  H    3.665789   4.739831   2.181815   2.511346   1.091921
    14  C    3.486657   2.775420   3.800187   4.146144   4.407216
    15  H    3.809665   3.177822   4.636596   4.833723   5.106531
    16  H    3.763056   2.544197   4.206042   4.527735   5.083904
    17  H    4.328044   3.755520   3.963129   4.551261   4.320841
    18  C    3.980541   4.387139   1.526832   2.135232   2.520883
    19  H    4.491106   5.171858   2.170673   2.462314   2.767889
    20  H    4.826246   5.032236   2.169124   3.056452   2.779055
    21  H    3.911143   4.007566   2.177663   2.493625   3.481172
    22  H    3.119812   2.651246   2.053236   2.627677   3.296989
                   11         12         13         14         15
    11  H    0.000000
    12  H    1.778290   0.000000
    13  H    1.765643   1.762642   0.000000
    14  C    4.564576   5.445017   4.111365   0.000000
    15  H    5.334667   6.109841   4.609300   1.093066   0.000000
    16  H    5.225603   6.097387   4.957649   1.095772   1.764365
    17  H    4.219351   5.408780   4.065895   1.091257   1.775749
    18  C    2.758998   2.788281   3.478838   4.854841   5.819058
    19  H    3.101000   2.588237   3.779600   5.826712   6.739135
    20  H    2.567688   3.156889   3.777265   4.993300   6.019593
    21  H    3.771921   3.787987   4.330134   4.921921   5.900716
    22  H    3.473512   4.159219   3.694627   2.655024   3.690175
                   16         17         18         19         20
    16  H    0.000000
    17  H    1.771047   0.000000
    18  C    5.007043   4.923545   0.000000
    19  H    6.036542   5.911201   1.092045   0.000000
    20  H    5.135280   4.832852   1.094301   1.769310   0.000000
    21  H    4.844424   5.134553   1.094526   1.765700   1.772988
    22  H    2.588764   2.886949   2.446110   3.503779   2.654129
                   21         22
    21  H    0.000000
    22  H    2.319058   0.000000
 Stoichiometry    C6H15N
 Framework group  C1[X(C6H15N)]
 Deg. of freedom    60
 Full point group                 C1
 Largest Abelian subgroup         C1      NOp   1
 Largest concise Abelian subgroup C1      NOp   1
                         Standard orientation:                         
 ---------------------------------------------------------------------
 Center     Atomic     Atomic              Coordinates (Angstroms)
 Number     Number      Type              X           Y           Z
 ---------------------------------------------------------------------
    1          7             0       -0.006611    0.073091   -0.570270
    2          6             0        1.243714    0.207349    0.174938
    3          1             0        1.081744    0.991733    0.921463
    4          6             0        1.683251   -1.067095    0.917705
    5          1             0        2.591518   -0.890250    1.500007
    6          1             0        0.915192   -1.421290    1.607565
    7          1             0        1.894123   -1.870309    0.204761
    8          6             0       -1.235995   -0.150976    0.191177
    9          1             0       -1.061765   -0.814451    1.054790
   10          6             0       -1.768843    1.177881    0.735938
   11          1             0       -2.018279    1.849014   -0.088582
   12          1             0       -2.662053    1.018015    1.345751
   13          1             0       -1.027600    1.677693    1.362865
   14          6             0        2.342650    0.687882   -0.773724
   15          1             0        3.242586    0.975129   -0.223818
   16          1             0        2.625663   -0.105072   -1.475039
   17          1             0        1.995921    1.545678   -1.352350
   18          6             0       -2.268902   -0.828211   -0.706416
   19          1             0       -3.194283   -1.019479   -0.159014
   20          1             0       -2.508059   -0.193658   -1.565277
   21          1             0       -1.900174   -1.787679   -1.082513
   22          1             0        0.096501   -0.627696   -1.296429
 ---------------------------------------------------------------------
 Rotational constants (GHZ):      4.0857521      1.4080715      1.3574742
 Standard basis: TZVP (5D, 7F)
 There are   223 symmetry adapted basis functions of A   symmetry.
 Integral buffers will be    131072 words long.
 Raffenetti 2 integral format.
 Two-electron integral symmetry is turned on.
   223 basis functions,   365 primitive gaussians,   230 cartesian basis functions
    29 alpha electrons       29 beta electrons
       nuclear repulsion energy       334.5307112640 Hartrees.
 NAtoms=   22 NActive=   22 NUniq=   22 SFac= 7.50D-01 NAtFMM=   80 NAOKFM=F Big=F
 One-electron integrals computed using PRISM.
 NBasis=   223 RedAO= T  NBF=   223
 NBsUse=   223 1.00D-06 NBFU=   223
 Initial guess read from the read-write file:
 Initial guess orbital symmetries:
       Occupied  (A) (A) (A) (A) (A) (A) (A) (A) (A) (A) (A) (A)
                 (A) (A) (A) (A) (A) (A) (A) (A) (A) (A) (A) (A)
                 (A) (A) (A) (A) (A)
       Virtual   (A) (A) (A) (A) (A) (A) (A) (A) (A) (A) (A) (A)
                 (A) (A) (A) (A) (A) (A) (A) (A) (A) (A) (A) (A)
                 (A) (A) (A) (A) (A) (A) (A) (A) (A) (A) (A) (A)
                 (A) (A) (A) (A) (A) (A) (A) (A) (A) (A) (A) (A)
                 (A) (A) (A) (A) (A) (A) (A) (A) (A) (A) (A) (A)
                 (A) (A) (A) (A) (A) (A) (A) (A) (A) (A) (A) (A)
                 (A) (A) (A) (A) (A) (A) (A) (A) (A) (A) (A) (A)
                 (A) (A) (A) (A) (A) (A) (A) (A) (A) (A) (A) (A)
                 (A) (A) (A) (A) (A) (A) (A) (A) (A) (A) (A) (A)
                 (A) (A) (A) (A) (A) (A) (A) (A) (A) (A) (A) (A)
                 (A) (A) (A) (A) (A) (A) (A) (A) (A) (A) (A) (A)
                 (A) (A) (A) (A) (A) (A) (A) (A) (A) (A) (A) (A)
                 (A) (A) (A) (A) (A) (A) (A) (A) (A) (A) (A) (A)
                 (A) (A) (A) (A) (A) (A) (A) (A) (A) (A) (A) (A)
                 (A) (A) (A) (A) (A) (A) (A) (A) (A) (A) (A) (A)
                 (A) (A) (A) (A) (A) (A) (A) (A) (A) (A) (A) (A)
                 (A) (A)
 Harris functional with IExCor=  402 diagonalized for initial guess.
 ExpMin= 9.52D-02 ExpMax= 1.97D+04 ExpMxC= 6.73D+02 IAcc=2 IRadAn=         4 AccDes= 0.00D+00
 HarFok:  IExCor= 402 AccDes= 0.00D+00 IRadAn=         4 IDoV=1
 ScaDFX=  1.000000  1.000000  1.000000  1.000000
 Requested convergence on RMS density matrix=1.00D-08 within 128 cycles.
 Requested convergence on MAX density matrix=1.00D-06.
 Requested convergence on             energy=1.00D-06.
 No special actions if energy rises.
 Keep R1 integrals in memory in canonical form, NReq=   360236806.
 Integral accuracy reduced to 1.0D-05 until final iterations.
 Initial convergence to 1.0D-05 achieved.  Increase integral accuracy.
 SCF Done:  E(RB+HF-LYP) =  -292.532069297     A.U. after   15 cycles
             Convg  =    0.2694D-08             -V/T =  2.0056
             S**2   =   0.0000
 Range of M.O.s used for correlation:     1   223
 NBasis=   223 NAE=    29 NBE=    29 NFC=     0 NFV=     0
 NROrb=    223 NOA=    29 NOB=    29 NVA=   194 NVB=   194

 **** Warning!!: The largest alpha MO coefficient is  0.18180681D+02

 Symmetrizing basis deriv contribution to polar:
 IMax=3 JMax=2 DiffMx= 0.00D+00
 G2DrvN: will do   23 centers at a time, making    1 passes doing MaxLOS=2.
 FoFDir/FoFCou used for L=0 through L=2.
 DoAtom=TTTTTTTTTTTTTTTTTTTTTT
          Differentiating once with respect to electric field.
                with respect to dipole field.
          Differentiating once with respect to nuclear coordinates.
          Store integrals in memory, NReq=   353689553.
          There are  69 degrees of freedom in the 1st order CPHF.
    66 vectors were produced by pass  0.
 AX will form  66 AO Fock derivatives at one time.
    66 vectors were produced by pass  1.
    66 vectors were produced by pass  2.
    66 vectors were produced by pass  3.
    66 vectors were produced by pass  4.
    31 vectors were produced by pass  5.
     3 vectors were produced by pass  6.
 Inv2:  IOpt= 1 Iter= 1 AM= 3.44D-15 Conv= 1.00D-12.
 Inverted reduced A of dimension  364 with in-core refinement.
 Isotropic polarizability for W=    0.000000       83.36 Bohr**3.
 End of Minotr Frequency-dependent properties file   721 does not exist.
 ***** Axes restored to original set *****
 -------------------------------------------------------------------
 Center     Atomic                   Forces (Hartrees/Bohr)
 Number     Number              X              Y              Z
 -------------------------------------------------------------------
    1          7           0.001218115   -0.003427416    0.000759836
    2          6           0.000832879    0.002848037   -0.001419785
    3          1          -0.000003928   -0.000271694   -0.000110965
    4          6           0.000246438   -0.000064049   -0.000252296
    5          1          -0.000026659   -0.000194540   -0.000073964
    6          1           0.000181521    0.000091165   -0.000075422
    7          1          -0.000053605    0.000048489   -0.000005514
    8          6          -0.002180361    0.001413181    0.000407314
    9          1           0.000528017   -0.001053339    0.000156317
   10          6          -0.000229873    0.000501885    0.000204516
   11          1          -0.000170627   -0.000055696    0.000008098
   12          1           0.000069157   -0.000185853   -0.000058722
   13          1          -0.000128651   -0.000117774    0.000107363
   14          6           0.000533075   -0.000385878   -0.000504335
   15          1           0.000002642   -0.000255914    0.000705600
   16          1          -0.000852698   -0.000281596   -0.000259412
   17          1           0.000189690    0.000670814   -0.000083721
   18          6          -0.000650434   -0.001182843    0.000371406
   19          1           0.000245124   -0.000071209   -0.000342715
   20          1           0.000469361    0.000601454    0.000189452
   21          1          -0.000487905    0.000265019   -0.000330367
   22          1           0.000268722    0.001107756    0.000607317
 -------------------------------------------------------------------
 Cartesian Forces:  Max     0.003427416 RMS     0.000790061

 GradGradGradGradGradGradGradGradGradGradGradGradGradGradGradGradGradGrad
 Berny optimization.
 Internal  Forces:  Max     0.003087674 RMS     0.000520924
 Search for a local minimum.
 Step number   5 out of a maximum of 118
 All quantities printed in internal units (Hartrees-Bohrs-Radians)
 Second derivative matrix not updated -- analytic derivatives used.
 Trust test= 9.21D-01 RLast= 6.42D-01 DXMaxT set to 8.49D-01
     Eigenvalues ---    0.00047   0.00207   0.00249   0.00284   0.00308
     Eigenvalues ---    0.00371   0.01722   0.03977   0.04163   0.04384
     Eigenvalues ---    0.04424   0.04498   0.04520   0.04603   0.04609
     Eigenvalues ---    0.04636   0.04668   0.04832   0.05212   0.05467
     Eigenvalues ---    0.05515   0.11069   0.11850   0.11945   0.12235
     Eigenvalues ---    0.12410   0.12610   0.12807   0.12951   0.13487
     Eigenvalues ---    0.14137   0.14262   0.14797   0.14960   0.18509
     Eigenvalues ---    0.18782   0.19155   0.19982   0.23911   0.26339
     Eigenvalues ---    0.27692   0.28665   0.29119   0.30016   0.32388
     Eigenvalues ---    0.32682   0.32833   0.32967   0.33109   0.33256
     Eigenvalues ---    0.33311   0.33425   0.33447   0.34012   0.34138
     Eigenvalues ---    0.34213   0.34310   0.34786   0.37497   0.43883
     Eigenvalues --- 1000.000001000.000001000.000001000.000001000.00000
     Eigenvalues --- 1000.000001000.000001000.000001000.000001000.00000
     Eigenvalues --- 1000.000001000.000001000.000001000.000001000.00000
     Eigenvalues --- 1000.000001000.000001000.000001000.000001000.00000
     Eigenvalues --- 1000.000001000.000001000.000001000.000001000.00000
     Eigenvalues --- 1000.000001000.000001000.000001000.000001000.00000
     Eigenvalues --- 1000.000001000.000001000.000001000.000001000.00000
     Eigenvalues --- 1000.000001000.000001000.000001000.000001000.00000
     Eigenvalues --- 1000.000001000.000001000.000001000.000001000.00000
     Eigenvalues --- 1000.000001000.000001000.00000
 RFO step:  Lambda=-1.60851141D-04.
 Quartic linear search produced a step of  0.54882.
 Iteration  1 RMS(Cart)=  0.09613992 RMS(Int)=  0.00234623
 Iteration  2 RMS(Cart)=  0.00398134 RMS(Int)=  0.00014589
 Iteration  3 RMS(Cart)=  0.00000331 RMS(Int)=  0.00014586
 Iteration  4 RMS(Cart)=  0.00000000 RMS(Int)=  0.00014586
 Variable       Old X    -DE/DX   Delta X   Delta X   Delta X     New X
                                 (Linear)    (Quad)   (Total)
    R1        2.76228   0.00309   0.01442  -0.00304   0.01139   2.77367
    R2        2.76533   0.00247   0.01065  -0.00416   0.00649   2.77182
    R3        1.91697  -0.00012  -0.00212   0.00347   0.00135   1.91832
    R4        2.06905  -0.00007  -0.00149  -0.00026  -0.00175   2.06730
    R5        2.90865  -0.00019  -0.00472   0.00161  -0.00311   2.90554
    R6        2.88982   0.00010  -0.00029  -0.00084  -0.00113   2.88869
    R7        2.06603  -0.00012  -0.00099   0.00044  -0.00054   2.06549
    R8        2.06255  -0.00013  -0.00054   0.00030  -0.00024   2.06232
    R9        2.06829  -0.00006   0.00006  -0.00009  -0.00003   2.06826
   R10        2.08417  -0.00076  -0.00054   0.00029  -0.00025   2.08392
   R11        2.89477   0.00021  -0.00290   0.00031  -0.00259   2.89218
   R12        2.88529   0.00028   0.00008   0.00163   0.00172   2.88701
   R13        2.06359   0.00008  -0.00023   0.00066   0.00043   2.06402
   R14        2.06599  -0.00014  -0.00123  -0.00001  -0.00124   2.06475
   R15        2.06343  -0.00018  -0.00010  -0.00077  -0.00087   2.06256
   R16        2.06559  -0.00058  -0.00372   0.00208  -0.00164   2.06395
   R17        2.07071  -0.00064  -0.00410   0.00241  -0.00169   2.06902
   R18        2.06218  -0.00050  -0.00391   0.00229  -0.00162   2.06056
   R19        2.06367  -0.00040  -0.00385   0.00249  -0.00136   2.06231
   R20        2.06793  -0.00069  -0.00488   0.00178  -0.00310   2.06483
   R21        2.06835  -0.00061  -0.00319   0.00184  -0.00135   2.06701
    A1        2.05714   0.00196  -0.00729   0.01391   0.00599   2.06313
    A2        1.91925  -0.00078  -0.01749   0.00372  -0.01461   1.90464
    A3        1.93061  -0.00060  -0.01360  -0.00041  -0.01494   1.91567
    A4        1.86175   0.00020   0.00150   0.00264   0.00409   1.86584
    A5        1.99790   0.00042   0.00246  -0.00138   0.00103   1.99893
    A6        1.90423  -0.00046  -0.00849  -0.00140  -0.00989   1.89434
    A7        1.88220   0.00001   0.00543  -0.00139   0.00402   1.88622
    A8        1.87986   0.00000  -0.00038  -0.00014  -0.00052   1.87934
    A9        1.93300  -0.00017  -0.00026   0.00176   0.00148   1.93448
   A10        1.93941  -0.00028  -0.00507   0.00231  -0.00275   1.93666
   A11        1.95277   0.00026   0.00387  -0.00223   0.00163   1.95440
   A12        1.92657   0.00005   0.00230  -0.00055   0.00174   1.92831
   A13        1.87597   0.00000   0.00006  -0.00034  -0.00027   1.87570
   A14        1.88135   0.00005  -0.00138   0.00132  -0.00006   1.88129
   A15        1.88509  -0.00008   0.00013  -0.00045  -0.00034   1.88474
   A16        1.94641  -0.00022   0.00941  -0.00303   0.00630   1.95271
   A17        1.92245   0.00069   0.00050   0.00569   0.00595   1.92840
   A18        1.90748  -0.00019  -0.01129  -0.00202  -0.01332   1.89416
   A19        1.87375   0.00014   0.00455   0.00198   0.00645   1.88020
   A20        1.87588   0.00015   0.00105  -0.00147  -0.00034   1.87554
   A21        1.93748  -0.00059  -0.00365  -0.00130  -0.00500   1.93248
   A22        1.92206   0.00011   0.00185  -0.00199  -0.00018   1.92189
   A23        1.93446  -0.00006  -0.00492  -0.00133  -0.00624   1.92822
   A24        1.94457   0.00015   0.00559   0.00364   0.00921   1.95378
   A25        1.90118  -0.00013  -0.00026  -0.00200  -0.00228   1.89890
   A26        1.88311  -0.00006   0.00026   0.00171   0.00191   1.88502
   A27        1.87685  -0.00002  -0.00254  -0.00002  -0.00253   1.87432
   A28        1.94136  -0.00018  -0.00226   0.00117  -0.00109   1.94026
   A29        1.93398  -0.00012  -0.00402   0.00054  -0.00349   1.93049
   A30        1.92582   0.00018   0.00012   0.00250   0.00262   1.92844
   A31        1.87497   0.00018   0.00373  -0.00130   0.00243   1.87740
   A32        1.89841   0.00000   0.00295  -0.00111   0.00183   1.90024
   A33        1.88760  -0.00006  -0.00025  -0.00202  -0.00227   1.88533
   A34        1.93506  -0.00003  -0.00365   0.00233  -0.00133   1.93373
   A35        1.93055  -0.00018  -0.00201  -0.00065  -0.00267   1.92788
   A36        1.94220  -0.00013  -0.00065  -0.00041  -0.00106   1.94114
   A37        1.88576   0.00019   0.00528   0.00116   0.00644   1.89220
   A38        1.87987   0.00008   0.00039  -0.00124  -0.00086   1.87901
   A39        1.88836   0.00009   0.00100  -0.00123  -0.00023   1.88813
    D1       -0.93420   0.00017   0.00312  -0.01953  -0.01627  -0.95047
    D2        1.14604   0.00058   0.01235  -0.02027  -0.00777   1.13827
    D3       -2.96029   0.00030   0.00705  -0.02007  -0.01286  -2.97315
    D4        3.11477   0.00006   0.04831  -0.03465   0.01350   3.12827
    D5       -1.08818   0.00047   0.05754  -0.03539   0.02200  -1.06618
    D6        1.08868   0.00019   0.05224  -0.03519   0.01691   1.10559
    D7       -0.65834  -0.00063  -0.10187  -0.04470  -0.14674  -0.80507
    D8        1.42030  -0.00014  -0.09003  -0.04044  -0.13054   1.28976
    D9       -2.72991  -0.00055  -0.10185  -0.03971  -0.14162  -2.87154
   D10        1.57048  -0.00059  -0.14901  -0.02746  -0.17643   1.39405
   D11       -2.63407  -0.00010  -0.13717  -0.02320  -0.16024  -2.79431
   D12       -0.50110  -0.00051  -0.14898  -0.02247  -0.17132  -0.67242
   D13       -3.08632  -0.00038  -0.00870  -0.01310  -0.02182  -3.10814
   D14       -0.98929  -0.00039  -0.00946  -0.01346  -0.02295  -1.01224
   D15        1.11052  -0.00029  -0.00520  -0.01589  -0.02111   1.08942
   D16       -1.01761   0.00014  -0.00164  -0.01158  -0.01321  -1.03082
   D17        1.07942   0.00012  -0.00240  -0.01194  -0.01434   1.06508
   D18       -3.10396   0.00022   0.00187  -0.01437  -0.01250  -3.11646
   D19        1.03531   0.00005   0.00098  -0.01159  -0.01059   1.02472
   D20        3.13234   0.00003   0.00022  -0.01195  -0.01172   3.12062
   D21       -1.05103   0.00013   0.00449  -0.01438  -0.00988  -1.06091
   D22        2.96016   0.00030   0.04693   0.05355   0.10047   3.06063
   D23       -1.23855   0.00034   0.04747   0.05304   0.10051  -1.13804
   D24        0.85161   0.00030   0.04463   0.05249   0.09712   0.94873
   D25        0.94567   0.00031   0.04981   0.05124   0.10103   1.04671
   D26        3.03015   0.00034   0.05035   0.05073   0.10107   3.13122
   D27       -1.16287   0.00031   0.04751   0.05018   0.09768  -1.06519
   D28       -1.10869   0.00039   0.04363   0.05201   0.09565  -1.01303
   D29        0.97579   0.00042   0.04417   0.05150   0.09569   1.07148
   D30        3.06595   0.00039   0.04133   0.05095   0.09230  -3.12493
   D31        1.08238  -0.00007  -0.00584  -0.01761  -0.02347   1.05891
   D32       -3.09580  -0.00020  -0.00815  -0.02229  -0.03046  -3.12627
   D33       -1.00653  -0.00016  -0.01092  -0.02079  -0.03176  -1.03829
   D34       -3.07836   0.00016   0.00862  -0.01670  -0.00806  -3.08642
   D35       -0.97336   0.00003   0.00631  -0.02138  -0.01504  -0.98841
   D36        1.11591   0.00007   0.00354  -0.01988  -0.01635   1.09957
   D37       -1.03277   0.00010   0.01059  -0.01802  -0.00741  -1.04017
   D38        1.07223  -0.00004   0.00828  -0.02270  -0.01439   1.05784
   D39       -3.12167   0.00000   0.00551  -0.02120  -0.01570  -3.13737
   D40        3.12893  -0.00011   0.01735   0.00453   0.02184  -3.13242
   D41       -1.06261  -0.00002   0.02026   0.00707   0.02729  -1.03532
   D42        1.03701  -0.00011   0.01975   0.00481   0.02451   1.06152
   D43        1.01396   0.00018   0.01188   0.01025   0.02212   1.03608
   D44        3.10561   0.00027   0.01479   0.01279   0.02757   3.13318
   D45       -1.07796   0.00018   0.01427   0.01053   0.02479  -1.05317
   D46       -1.03033   0.00025   0.00779   0.00946   0.01731  -1.01303
   D47        1.06131   0.00034   0.01070   0.01200   0.02276   1.08407
   D48       -3.12226   0.00025   0.01018   0.00974   0.01998  -3.10227
         Item               Value     Threshold  Converged?
 Maximum Force            0.003088     0.000015     NO 
 RMS     Force            0.000521     0.000010     NO 
 Maximum Displacement     0.251915     0.000060     NO 
 RMS     Displacement     0.096052     0.000040     NO 
 Predicted change in Energy=-5.485004D-04
 GradGradGradGradGradGradGradGradGradGradGradGradGradGradGradGradGradGrad

                          Input orientation:                          
 ---------------------------------------------------------------------
 Center     Atomic     Atomic              Coordinates (Angstroms)
 Number     Number      Type              X           Y           Z
 ---------------------------------------------------------------------
    1          7             0       -0.097760   -0.312291   -0.055397
    2          6             0        0.603743    0.765571   -0.762810
    3          1             0       -0.132773    1.255805   -1.406227
    4          6             0        1.222446    1.833759    0.153824
    5          1             0        1.699386    2.623407   -0.432396
    6          1             0        0.474658    2.306383    0.792920
    7          1             0        1.986157    1.388816    0.799305
    8          6             0       -1.304340    0.028477    0.705850
    9          1             0       -1.157937    0.927597    1.327331
   10          6             0       -2.475548    0.301858   -0.240667
   11          1             0       -2.691146   -0.586809   -0.837961
   12          1             0       -3.370209    0.570829    0.325949
   13          1             0       -2.263190    1.125039   -0.925185
   14          6             0        1.667510    0.142054   -1.666320
   15          1             0        2.162038    0.901718   -2.275622
   16          1             0        2.438152   -0.354888   -1.068060
   17          1             0        1.219873   -0.602371   -2.325430
   18          6             0       -1.628600   -1.131001    1.646305
   19          1             0       -2.528652   -0.919513    2.226107
   20          1             0       -1.792186   -2.049640    1.077754
   21          1             0       -0.812584   -1.307685    2.352937
   22          1             0        0.560247   -0.799781    0.544496
 ---------------------------------------------------------------------
                    Distance matrix (angstroms):
                    1          2          3          4          5
     1  N    0.000000
     2  C    1.467763   0.000000
     3  H    2.069998   1.093969   0.000000
     4  C    2.528290   1.537543   2.145788   0.000000
     5  H    3.462685   2.182009   2.485053   1.093009   0.000000
     6  H    2.811540   2.193413   2.511758   1.091331   1.761211
     7  H    2.822586   2.177087   3.061360   1.094475   1.767354
     8  C    1.466784   2.518144   2.709201   3.154113   4.129363
     9  H    2.138513   2.738331   2.937860   2.804367   3.759881
    10  C    2.462800   3.157483   2.785165   4.022127   4.780840
    11  H    2.722760   3.562425   3.203659   4.707334   5.454058
    12  H    3.410902   4.124999   3.735053   4.766246   5.521681
    13  H    2.740719   2.893940   2.187962   3.717015   4.264969
    14  C    2.432628   1.528628   2.132864   2.524455   2.771408
    15  H    3.392625   2.176102   2.479391   2.766539   2.564321
    16  H    2.730961   2.171097   3.052596   2.785878   3.133702
    17  H    2.640710   2.166255   2.475359   3.475836   3.770830
    18  C    2.430956   3.792648   4.153588   4.375588   5.430660
    19  H    3.388689   4.645969   4.864781   5.093683   6.123416
    20  H    2.678337   4.129596   4.455309   5.002244   6.025695
    21  H    2.702195   4.001532   4.600537   4.341212   5.433375
    22  H    1.015131   2.039919   2.917367   2.743477   3.737670
                    6          7          8          9         10
     6  H    0.000000
     7  H    1.768219   0.000000
     8  C    2.891586   3.561829   0.000000
     9  H    2.202728   3.221313   1.102765   0.000000
    10  C    3.713507   4.708485   1.530477   2.141557   0.000000
    11  H    4.588316   5.334876   2.164523   3.054938   1.092233
    12  H    4.244197   5.439101   2.169398   2.454424   1.092619
    13  H    3.441405   4.593516   2.186805   2.516822   1.091461
    14  C    3.486413   2.781233   3.804206   4.190725   4.384399
    15  H    3.773100   3.118233   4.654836   4.899405   5.099812
    16  H    3.794854   2.594581   4.159323   4.507163   5.025967
    17  H    4.329007   3.783647   3.994781   4.619247   4.338203
    18  C    4.119171   4.487020   1.527740   2.135672   2.516162
    19  H    4.634684   5.267603   2.169978   2.469509   2.753097
    20  H    4.918805   5.116286   2.166766   3.054260   2.781144
    21  H    4.141513   4.185432   2.177166   2.483471   3.476042
    22  H    3.117257   2.624519   2.046639   2.559067   3.323574
                   11         12         13         14         15
    11  H    0.000000
    12  H    1.776496   0.000000
    13  H    1.766686   1.760107   0.000000
    14  C    4.496143   5.434298   4.118974   0.000000
    15  H    5.275981   6.122370   4.632083   1.092198   0.000000
    16  H    5.139692   6.044606   4.930843   1.094877   1.764512
    17  H    4.184361   5.429094   4.132355   1.090401   1.775511
    18  C    2.756216   2.769976   3.479221   4.843397   5.820858
    19  H    3.086359   2.557330   3.765807   5.821141   6.751667
    20  H    2.572541   3.149956   3.783146   4.929803   5.965864
    21  H    3.772333   3.765494   4.332262   4.940348   5.929030
    22  H    3.539506   4.168311   3.719771   2.645901   3.662499
                   16         17         18         19         20
    16  H    0.000000
    17  H    1.768172   0.000000
    18  C    4.950615   4.916088   0.000000
    19  H    5.986607   5.904956   1.091325   0.000000
    20  H    5.037108   4.769565   1.092660   1.771520   0.000000
    21  H    4.814387   5.149317   1.093814   1.763988   1.770935
    22  H    2.514914   2.951364   2.472800   3.519012   2.716699
                   21         22
    21  H    0.000000
    22  H    2.326605   0.000000
 Stoichiometry    C6H15N
 Framework group  C1[X(C6H15N)]
 Deg. of freedom    60
 Full point group                 C1
 Largest Abelian subgroup         C1      NOp   1
 Largest concise Abelian subgroup C1      NOp   1
                         Standard orientation:                         
 ---------------------------------------------------------------------
 Center     Atomic     Atomic              Coordinates (Angstroms)
 Number     Number      Type              X           Y           Z
 ---------------------------------------------------------------------
    1          7             0       -0.012638   -0.218572   -0.541050
    2          6             0        1.241666    0.260084    0.052193
    3          1             0        1.077625    1.300947    0.346239
    4          6             0        1.698439   -0.520509    1.295605
    5          1             0        2.616938   -0.095584    1.708482
    6          1             0        0.946327   -0.505725    2.086246
    7          1             0        1.899086   -1.565504    1.039480
    8          6             0       -1.244406   -0.091069    0.245046
    9          1             0       -1.104363   -0.427336    1.285912
   10          6             0       -1.706062    1.367583    0.284668
   11          1             0       -1.911038    1.724334   -0.727106
   12          1             0       -2.615003    1.464742    0.883169
   13          1             0       -0.952745    2.021943    0.726952
   14          6             0        2.325127    0.247569   -1.026074
   15          1             0        3.258703    0.673559   -0.652090
   16          1             0        2.535524   -0.777192   -1.349110
   17          1             0        2.002175    0.816650   -1.898325
   18          6             0       -2.315807   -0.980290   -0.383742
   19          1             0       -3.254037   -0.906152    0.168723
   20          1             0       -2.500211   -0.682430   -1.418720
   21          1             0       -2.010688   -2.030680   -0.380068
   22          1             0        0.106431   -1.181779   -0.838616
 ---------------------------------------------------------------------
 Rotational constants (GHZ):      4.0998691      1.3859595      1.3824944
 Standard basis: TZVP (5D, 7F)
 There are   223 symmetry adapted basis functions of A   symmetry.
 Integral buffers will be    131072 words long.
 Raffenetti 2 integral format.
 Two-electron integral symmetry is turned on.
   223 basis functions,   365 primitive gaussians,   230 cartesian basis functions
    29 alpha electrons       29 beta electrons
       nuclear repulsion energy       334.6202986916 Hartrees.
 NAtoms=   22 NActive=   22 NUniq=   22 SFac= 7.50D-01 NAtFMM=   80 NAOKFM=F Big=F
 One-electron integrals computed using PRISM.
 NBasis=   223 RedAO= T  NBF=   223
 NBsUse=   223 1.00D-06 NBFU=   223
 Initial guess read from the read-write file:
 Initial guess orbital symmetries:
       Occupied  (A) (A) (A) (A) (A) (A) (A) (A) (A) (A) (A) (A)
                 (A) (A) (A) (A) (A) (A) (A) (A) (A) (A) (A) (A)
                 (A) (A) (A) (A) (A)
       Virtual   (A) (A) (A) (A) (A) (A) (A) (A) (A) (A) (A) (A)
                 (A) (A) (A) (A) (A) (A) (A) (A) (A) (A) (A) (A)
                 (A) (A) (A) (A) (A) (A) (A) (A) (A) (A) (A) (A)
                 (A) (A) (A) (A) (A) (A) (A) (A) (A) (A) (A) (A)
                 (A) (A) (A) (A) (A) (A) (A) (A) (A) (A) (A) (A)
                 (A) (A) (A) (A) (A) (A) (A) (A) (A) (A) (A) (A)
                 (A) (A) (A) (A) (A) (A) (A) (A) (A) (A) (A) (A)
                 (A) (A) (A) (A) (A) (A) (A) (A) (A) (A) (A) (A)
                 (A) (A) (A) (A) (A) (A) (A) (A) (A) (A) (A) (A)
                 (A) (A) (A) (A) (A) (A) (A) (A) (A) (A) (A) (A)
                 (A) (A) (A) (A) (A) (A) (A) (A) (A) (A) (A) (A)
                 (A) (A) (A) (A) (A) (A) (A) (A) (A) (A) (A) (A)
                 (A) (A) (A) (A) (A) (A) (A) (A) (A) (A) (A) (A)
                 (A) (A) (A) (A) (A) (A) (A) (A) (A) (A) (A) (A)
                 (A) (A) (A) (A) (A) (A) (A) (A) (A) (A) (A) (A)
                 (A) (A) (A) (A) (A) (A) (A) (A) (A) (A) (A) (A)
                 (A) (A)
 Harris functional with IExCor=  402 diagonalized for initial guess.
 ExpMin= 9.52D-02 ExpMax= 1.97D+04 ExpMxC= 6.73D+02 IAcc=2 IRadAn=         4 AccDes= 0.00D+00
 HarFok:  IExCor= 402 AccDes= 0.00D+00 IRadAn=         4 IDoV=1
 ScaDFX=  1.000000  1.000000  1.000000  1.000000
 Requested convergence on RMS density matrix=1.00D-08 within 128 cycles.
 Requested convergence on MAX density matrix=1.00D-06.
 Requested convergence on             energy=1.00D-06.
 No special actions if energy rises.
 Keep R1 integrals in memory in canonical form, NReq=   360236792.
 Integral accuracy reduced to 1.0D-05 until final iterations.
 Initial convergence to 1.0D-05 achieved.  Increase integral accuracy.
 SCF Done:  E(RB+HF-LYP) =  -292.532612305     A.U. after   13 cycles
             Convg  =    0.9672D-08             -V/T =  2.0056
             S**2   =   0.0000
 Range of M.O.s used for correlation:     1   223
 NBasis=   223 NAE=    29 NBE=    29 NFC=     0 NFV=     0
 NROrb=    223 NOA=    29 NOB=    29 NVA=   194 NVB=   194

 **** Warning!!: The largest alpha MO coefficient is  0.15792615D+02

 Symmetrizing basis deriv contribution to polar:
 IMax=3 JMax=2 DiffMx= 0.00D+00
 G2DrvN: will do   23 centers at a time, making    1 passes doing MaxLOS=2.
 FoFDir/FoFCou used for L=0 through L=2.
 DoAtom=TTTTTTTTTTTTTTTTTTTTTT
          Differentiating once with respect to electric field.
                with respect to dipole field.
          Differentiating once with respect to nuclear coordinates.
          Store integrals in memory, NReq=   353689553.
          There are  69 degrees of freedom in the 1st order CPHF.
    66 vectors were produced by pass  0.
 AX will form  66 AO Fock derivatives at one time.
    66 vectors were produced by pass  1.
    66 vectors were produced by pass  2.
    66 vectors were produced by pass  3.
    66 vectors were produced by pass  4.
    33 vectors were produced by pass  5.
     3 vectors were produced by pass  6.
 Inv2:  IOpt= 1 Iter= 1 AM= 3.19D-15 Conv= 1.00D-12.
 Inverted reduced A of dimension  366 with in-core refinement.
 Isotropic polarizability for W=    0.000000       83.32 Bohr**3.
 End of Minotr Frequency-dependent properties file   721 does not exist.
 ***** Axes restored to original set *****
 -------------------------------------------------------------------
 Center     Atomic                   Forces (Hartrees/Bohr)
 Number     Number              X              Y              Z
 -------------------------------------------------------------------
    1          7           0.000598111   -0.000149957    0.000266910
    2          6          -0.000019599    0.000135569   -0.000339143
    3          1           0.000043361   -0.000141732    0.000052822
    4          6          -0.000036305    0.000139276   -0.000098027
    5          1           0.000076209    0.000048229    0.000022546
    6          1          -0.000054173   -0.000005380    0.000059342
    7          1           0.000056790    0.000025881    0.000012424
    8          6          -0.000563085   -0.000013228   -0.000340392
    9          1           0.000269512   -0.000208071   -0.000085719
   10          6          -0.000200190    0.000238437    0.000192467
   11          1          -0.000039448    0.000032206   -0.000090232
   12          1          -0.000072448   -0.000151306   -0.000018465
   13          1          -0.000030233   -0.000022241    0.000134767
   14          6           0.000140961   -0.000056414   -0.000002317
   15          1           0.000068456   -0.000023597    0.000049766
   16          1          -0.000035350   -0.000160907   -0.000133580
   17          1           0.000018469    0.000093241   -0.000121781
   18          6          -0.000118214   -0.000061547    0.000308777
   19          1          -0.000144772   -0.000042552    0.000059296
   20          1           0.000078648    0.000047852   -0.000050500
   21          1          -0.000032790    0.000028060   -0.000041721
   22          1          -0.000003909    0.000248181    0.000162761
 -------------------------------------------------------------------
 Cartesian Forces:  Max     0.000598111 RMS     0.000162853

 GradGradGradGradGradGradGradGradGradGradGradGradGradGradGradGradGradGrad
 Berny optimization.
 Internal  Forces:  Max     0.000700920 RMS     0.000151223
 Search for a local minimum.
 Step number   6 out of a maximum of 118
 All quantities printed in internal units (Hartrees-Bohrs-Radians)
 Second derivative matrix not updated -- analytic derivatives used.
 Trust test= 9.90D-01 RLast= 4.95D-01 DXMaxT set to 1.00D+00
     Eigenvalues ---    0.00033   0.00198   0.00262   0.00290   0.00292
     Eigenvalues ---    0.00451   0.01809   0.03938   0.04199   0.04381
     Eigenvalues ---    0.04419   0.04495   0.04527   0.04593   0.04613
     Eigenvalues ---    0.04642   0.04659   0.04792   0.05185   0.05454
     Eigenvalues ---    0.05505   0.10931   0.11880   0.11981   0.12285
     Eigenvalues ---    0.12429   0.12634   0.12908   0.12998   0.13582
     Eigenvalues ---    0.14159   0.14265   0.14779   0.14968   0.18484
     Eigenvalues ---    0.18849   0.19256   0.19933   0.23789   0.26462
     Eigenvalues ---    0.27900   0.28571   0.29075   0.29823   0.32432
     Eigenvalues ---    0.32793   0.33003   0.33017   0.33254   0.33333
     Eigenvalues ---    0.33429   0.33504   0.33606   0.34131   0.34205
     Eigenvalues ---    0.34279   0.34399   0.34587   0.36968   0.43654
     Eigenvalues --- 1000.000001000.000001000.000001000.000001000.00000
     Eigenvalues --- 1000.000001000.000001000.000001000.000001000.00000
     Eigenvalues --- 1000.000001000.000001000.000001000.000001000.00000
     Eigenvalues --- 1000.000001000.000001000.000001000.000001000.00000
     Eigenvalues --- 1000.000001000.000001000.000001000.000001000.00000
     Eigenvalues --- 1000.000001000.000001000.000001000.000001000.00000
     Eigenvalues --- 1000.000001000.000001000.000001000.000001000.00000
     Eigenvalues --- 1000.000001000.000001000.000001000.000001000.00000
     Eigenvalues --- 1000.000001000.000001000.000001000.000001000.00000
     Eigenvalues --- 1000.000001000.000001000.00000
 RFO step:  Lambda=-4.67272754D-05.
 Quintic linear search produced a step of  0.24236.
 Iteration  1 RMS(Cart)=  0.07857001 RMS(Int)=  0.00181419
 Iteration  2 RMS(Cart)=  0.00269384 RMS(Int)=  0.00000646
 Iteration  3 RMS(Cart)=  0.00000247 RMS(Int)=  0.00000620
 Iteration  4 RMS(Cart)=  0.00000000 RMS(Int)=  0.00000620
 Variable       Old X    -DE/DX   Delta X   Delta X   Delta X     New X
                                 (Linear)    (Quad)   (Total)
    R1        2.77367   0.00040   0.00276  -0.00198   0.00078   2.77445
    R2        2.77182   0.00070   0.00157  -0.00023   0.00135   2.77317
    R3        1.91832  -0.00003   0.00033   0.00003   0.00036   1.91868
    R4        2.06730  -0.00012  -0.00042  -0.00033  -0.00075   2.06655
    R5        2.90554   0.00017  -0.00075   0.00128   0.00052   2.90606
    R6        2.88869   0.00031  -0.00027   0.00077   0.00050   2.88918
    R7        2.06549   0.00005  -0.00013   0.00022   0.00009   2.06558
    R8        2.06232   0.00007  -0.00006   0.00028   0.00022   2.06254
    R9        2.06826   0.00004  -0.00001   0.00031   0.00030   2.06856
   R10        2.08392  -0.00018  -0.00006   0.00021   0.00015   2.08408
   R11        2.89218   0.00015  -0.00063  -0.00061  -0.00123   2.89095
   R12        2.88701   0.00024   0.00042   0.00096   0.00137   2.88838
   R13        2.06402   0.00003   0.00011   0.00028   0.00038   2.06440
   R14        2.06475   0.00001  -0.00030  -0.00029  -0.00059   2.06416
   R15        2.06256  -0.00010  -0.00021  -0.00017  -0.00038   2.06219
   R16        2.06395  -0.00001  -0.00040   0.00027  -0.00012   2.06383
   R17        2.06902  -0.00003  -0.00041   0.00046   0.00005   2.06907
   R18        2.06056   0.00000  -0.00039   0.00051   0.00012   2.06068
   R19        2.06231   0.00014  -0.00033   0.00080   0.00047   2.06278
   R20        2.06483  -0.00002  -0.00075   0.00032  -0.00043   2.06440
   R21        2.06701  -0.00006  -0.00033   0.00023  -0.00010   2.06691
    A1        2.06313   0.00069   0.00145   0.00674   0.00818   2.07131
    A2        1.90464  -0.00018  -0.00354   0.00128  -0.00228   1.90236
    A3        1.91567  -0.00028  -0.00362  -0.00278  -0.00641   1.90926
    A4        1.86584   0.00002   0.00099   0.00025   0.00123   1.86707
    A5        1.99893  -0.00006   0.00025   0.00207   0.00232   2.00125
    A6        1.89434   0.00003  -0.00240  -0.00085  -0.00325   1.89109
    A7        1.88622   0.00000   0.00097  -0.00077   0.00021   1.88643
    A8        1.87934  -0.00006  -0.00013  -0.00185  -0.00197   1.87737
    A9        1.93448   0.00006   0.00036   0.00087   0.00123   1.93571
   A10        1.93666   0.00010  -0.00067   0.00070   0.00003   1.93669
   A11        1.95440  -0.00004   0.00039  -0.00059  -0.00020   1.95421
   A12        1.92831   0.00003   0.00042   0.00059   0.00102   1.92933
   A13        1.87570   0.00000  -0.00006   0.00028   0.00021   1.87592
   A14        1.88129  -0.00008  -0.00001  -0.00033  -0.00035   1.88095
   A15        1.88474  -0.00001  -0.00008  -0.00069  -0.00077   1.88397
   A16        1.95271  -0.00022   0.00153  -0.00090   0.00060   1.95331
   A17        1.92840   0.00045   0.00144   0.00493   0.00635   1.93475
   A18        1.89416  -0.00005  -0.00323  -0.00226  -0.00549   1.88867
   A19        1.88020  -0.00002   0.00156  -0.00185  -0.00030   1.87990
   A20        1.87554   0.00008  -0.00008  -0.00050  -0.00057   1.87497
   A21        1.93248  -0.00026  -0.00121   0.00046  -0.00074   1.93174
   A22        1.92189   0.00013  -0.00004   0.00092   0.00087   1.92276
   A23        1.92822   0.00003  -0.00151  -0.00166  -0.00317   1.92505
   A24        1.95378  -0.00006   0.00223   0.00089   0.00312   1.95690
   A25        1.89890  -0.00010  -0.00055  -0.00079  -0.00135   1.89756
   A26        1.88502  -0.00002   0.00046   0.00117   0.00162   1.88664
   A27        1.87432   0.00002  -0.00061  -0.00055  -0.00115   1.87317
   A28        1.94026   0.00000  -0.00027  -0.00045  -0.00071   1.93955
   A29        1.93049   0.00020  -0.00085   0.00248   0.00164   1.93212
   A30        1.92844   0.00002   0.00063  -0.00025   0.00038   1.92882
   A31        1.87740  -0.00007   0.00059  -0.00055   0.00003   1.87743
   A32        1.90024  -0.00006   0.00044  -0.00144  -0.00100   1.89924
   A33        1.88533  -0.00010  -0.00055   0.00017  -0.00038   1.88496
   A34        1.93373   0.00012  -0.00032   0.00069   0.00037   1.93410
   A35        1.92788  -0.00015  -0.00065  -0.00045  -0.00110   1.92678
   A36        1.94114  -0.00002  -0.00026  -0.00024  -0.00050   1.94064
   A37        1.89220   0.00002   0.00156   0.00095   0.00251   1.89471
   A38        1.87901  -0.00001  -0.00021   0.00006  -0.00015   1.87885
   A39        1.88813   0.00004  -0.00006  -0.00100  -0.00106   1.88707
    D1       -0.95047   0.00005  -0.00394  -0.03900  -0.04294  -0.99341
    D2        1.13827   0.00003  -0.00188  -0.03852  -0.04040   1.09787
    D3       -2.97315   0.00010  -0.00312  -0.03655  -0.03966  -3.01281
    D4        3.12827   0.00004   0.00327  -0.04184  -0.03857   3.08970
    D5       -1.06618   0.00002   0.00533  -0.04136  -0.03603  -1.10221
    D6        1.10559   0.00009   0.00410  -0.03939  -0.03529   1.07030
    D7       -0.80507  -0.00020  -0.03556  -0.05370  -0.08927  -0.89434
    D8        1.28976  -0.00007  -0.03164  -0.05329  -0.08491   1.20484
    D9       -2.87154  -0.00014  -0.03432  -0.05110  -0.08543  -2.95697
   D10        1.39405  -0.00014  -0.04276  -0.04885  -0.09161   1.30243
   D11       -2.79431  -0.00001  -0.03883  -0.04843  -0.08726  -2.88157
   D12       -0.67242  -0.00008  -0.04152  -0.04625  -0.08778  -0.76019
   D13       -3.10814   0.00001  -0.00529  -0.00172  -0.00701  -3.11515
   D14       -1.01224   0.00005  -0.00556  -0.00128  -0.00685  -1.01908
   D15        1.08942   0.00002  -0.00511  -0.00214  -0.00726   1.08216
   D16       -1.03082   0.00000  -0.00320  -0.00064  -0.00385  -1.03467
   D17        1.06508   0.00004  -0.00348  -0.00021  -0.00369   1.06139
   D18       -3.11646   0.00001  -0.00303  -0.00107  -0.00410  -3.12055
   D19        1.02472  -0.00004  -0.00257  -0.00285  -0.00541   1.01931
   D20        3.12062   0.00000  -0.00284  -0.00241  -0.00525   3.11537
   D21       -1.06091  -0.00002  -0.00239  -0.00327  -0.00566  -1.06657
   D22        3.06063   0.00005   0.02435  -0.00588   0.01847   3.07910
   D23       -1.13804   0.00010   0.02436  -0.00523   0.01913  -1.11892
   D24        0.94873   0.00011   0.02354  -0.00359   0.01995   0.96869
   D25        1.04671   0.00005   0.02449  -0.00477   0.01971   1.06642
   D26        3.13122   0.00010   0.02449  -0.00413   0.02036  -3.13160
   D27       -1.06519   0.00011   0.02367  -0.00248   0.02119  -1.04400
   D28       -1.01303   0.00005   0.02318  -0.00323   0.01996  -0.99308
   D29        1.07148   0.00009   0.02319  -0.00258   0.02061   1.09208
   D30       -3.12493   0.00011   0.02237  -0.00094   0.02143  -3.10350
   D31        1.05891  -0.00003  -0.00569  -0.04775  -0.05344   1.00547
   D32       -3.12627  -0.00005  -0.00738  -0.04920  -0.05659   3.10033
   D33       -1.03829  -0.00005  -0.00770  -0.05043  -0.05814  -1.09643
   D34       -3.08642  -0.00004  -0.00195  -0.04701  -0.04896  -3.13538
   D35       -0.98841  -0.00006  -0.00365  -0.04847  -0.05211  -1.04052
   D36        1.09957  -0.00005  -0.00396  -0.04970  -0.05366   1.04591
   D37       -1.04017  -0.00009  -0.00179  -0.04845  -0.05024  -1.09041
   D38        1.05784  -0.00011  -0.00349  -0.04991  -0.05339   1.00445
   D39       -3.13737  -0.00011  -0.00380  -0.05114  -0.05494   3.09087
   D40       -3.13242  -0.00016   0.00529  -0.02000  -0.01471   3.13605
   D41       -1.03532  -0.00016   0.00661  -0.01866  -0.01205  -1.04737
   D42        1.06152  -0.00021   0.00594  -0.02037  -0.01444   1.04708
   D43        1.03608   0.00009   0.00536  -0.01734  -0.01198   1.02410
   D44        3.13318   0.00009   0.00668  -0.01600  -0.00932   3.12386
   D45       -1.05317   0.00003   0.00601  -0.01771  -0.01171  -1.06487
   D46       -1.01303   0.00021   0.00419  -0.01507  -0.01087  -1.02390
   D47        1.08407   0.00021   0.00552  -0.01373  -0.00821   1.07586
   D48       -3.10227   0.00015   0.00484  -0.01545  -0.01060  -3.11287
         Item               Value     Threshold  Converged?
 Maximum Force            0.000701     0.000015     NO 
 RMS     Force            0.000151     0.000010     NO 
 Maximum Displacement     0.241351     0.000060     NO 
 RMS     Displacement     0.078668     0.000040     NO 
 Predicted change in Energy=-5.873553D-05
 GradGradGradGradGradGradGradGradGradGradGradGradGradGradGradGradGradGrad

                          Input orientation:                          
 ---------------------------------------------------------------------
 Center     Atomic     Atomic              Coordinates (Angstroms)
 Number     Number      Type              X           Y           Z
 ---------------------------------------------------------------------
    1          7             0       -0.084257   -0.321667   -0.034590
    2          6             0        0.597772    0.743289   -0.780410
    3          1             0       -0.139545    1.179752   -1.459939
    4          6             0        1.169990    1.872747    0.092389
    5          1             0        1.639439    2.643729   -0.524032
    6          1             0        0.396961    2.357464    0.691334
    7          1             0        1.930745    1.482241    0.775746
    8          6             0       -1.286154    0.017077    0.736284
    9          1             0       -1.117934    0.878975    1.403444
   10          6             0       -2.448664    0.368570   -0.193977
   11          1             0       -2.654308   -0.463874   -0.870854
   12          1             0       -3.349215    0.578310    0.387531
   13          1             0       -2.238682    1.252757   -0.798109
   14          6             0        1.693316    0.106306   -1.635713
   15          1             0        2.189962    0.852842   -2.259235
   16          1             0        2.457475   -0.357461   -1.003419
   17          1             0        1.273961   -0.667260   -2.279804
   18          6             0       -1.642376   -1.180571    1.616599
   19          1             0       -2.531016   -0.971446    2.215031
   20          1             0       -1.837468   -2.061322    1.000463
   21          1             0       -0.827632   -1.421059    2.305564
   22          1             0        0.586917   -0.782066    0.572399
 ---------------------------------------------------------------------
                    Distance matrix (angstroms):
                    1          2          3          4          5
     1  N    0.000000
     2  C    1.468176   0.000000
     3  H    2.070974   1.093570   0.000000
     4  C    2.530753   1.537819   2.145890   0.000000
     5  H    3.464715   2.182309   2.486752   1.093055   0.000000
     6  H    2.817140   2.193608   2.510541   1.091448   1.761481
     7  H    2.823289   2.178185   3.062007   1.094633   1.767297
     8  C    1.467497   2.525256   2.736771   3.144957   4.128776
     9  H    2.139619   2.780517   3.040834   2.817986   3.799030
    10  C    2.468248   3.124914   2.755486   3.929276   4.690188
    11  H    2.706423   3.470079   3.061463   4.583982   5.311661
    12  H    3.412930   4.119467   3.751913   4.710190   5.475725
    13  H    2.775485   2.881899   2.202209   3.577208   4.129134
    14  C    2.430333   1.528891   2.131329   2.525969   2.770785
    15  H    3.391251   2.175774   2.484421   2.758746   2.553679
    16  H    2.720352   2.172528   3.052204   2.798614   3.147401
    17  H    2.646729   2.166809   2.466097   3.477031   3.765495
    18  C    2.427319   3.803308   4.158691   4.422146   5.475206
    19  H    3.386685   4.658572   4.883870   5.127621   6.161546
    20  H    2.677962   4.119192   4.409203   5.034511   6.045698
    21  H    2.690277   4.029815   4.627817   4.442724   5.533132
    22  H    1.015322   2.038852   2.916654   2.760148   3.747803
                    6          7          8          9         10
     6  H    0.000000
     7  H    1.767947   0.000000
     8  C    2.883107   3.535067   0.000000
     9  H    2.233369   3.170548   1.102846   0.000000
    10  C    3.582883   4.621671   1.529824   2.140819   0.000000
    11  H    4.439664   5.246081   2.164729   3.055506   1.092435
    12  H    4.158307   5.370826   2.166295   2.470039   1.092307
    13  H    3.222643   4.462489   2.188281   2.498524   1.091262
    14  C    3.487606   2.786522   3.809405   4.211486   4.393561
    15  H    3.766244   3.110377   4.664227   4.935390   5.100652
    16  H    3.806406   2.612925   4.145069   4.483895   5.025188
    17  H    4.329635   3.793165   4.014883   4.655998   4.391077
    18  C    4.187207   4.534842   1.528467   2.135932   2.515577
    19  H    4.687894   5.291449   2.171072   2.465671   2.757852
    20  H    4.961240   5.177524   2.166444   3.053763   2.775720
    21  H    4.287493   4.286972   2.177410   2.487619   3.475373
    22  H    3.147519   2.640891   2.043008   2.521153   3.335573
                   11         12         13         14         15
    11  H    0.000000
    12  H    1.775548   0.000000
    13  H    1.767726   1.758949   0.000000
    14  C    4.451062   5.453752   4.180495   0.000000
    15  H    5.208483   6.145178   4.680567   1.092133   0.000000
    16  H    5.114609   6.043844   4.968788   1.094904   1.764503
    17  H    4.178255   5.480864   4.268554   1.090466   1.774877
    18  C    2.779404   2.741819   3.479581   4.833262   5.817531
    19  H    3.129779   2.531985   3.756534   5.816765   6.755347
    20  H    2.592469   3.103018   3.791959   4.910648   5.944592
    21  H    3.787160   3.746292   4.332798   4.921553   5.925697
    22  H    3.562270   4.168685   3.742033   2.624706   3.641542
                   16         17         18         19         20
    16  H    0.000000
    17  H    1.768004   0.000000
    18  C    4.934652   4.893922   0.000000
    19  H    5.968287   5.896942   1.091575   0.000000
    20  H    5.036390   4.731232   1.092431   1.773136   0.000000
    21  H    4.782525   5.100050   1.093761   1.764048   1.770026
    22  H    2.482434   2.936030   2.493774   3.529251   2.774415
                   21         22
    21  H    0.000000
    22  H    2.326612   0.000000
 Stoichiometry    C6H15N
 Framework group  C1[X(C6H15N)]
 Deg. of freedom    60
 Full point group                 C1
 Largest Abelian subgroup         C1      NOp   1
 Largest concise Abelian subgroup C1      NOp   1
                         Standard orientation:                         
 ---------------------------------------------------------------------
 Center     Atomic     Atomic              Coordinates (Angstroms)
 Number     Number      Type              X           Y           Z
 ---------------------------------------------------------------------
    1          7             0       -0.014258   -0.587184   -0.086404
    2          6             0        1.240211    0.166206   -0.205793
    3          1             0        1.083236    0.927942   -0.974567
    4          6             0        1.688584    0.874468    1.083476
    5          1             0        2.611452    1.436928    0.920010
    6          1             0        0.936233    1.577113    1.446132
    7          1             0        1.878347    0.144400    1.876705
    8          6             0       -1.247730    0.143849    0.226146
    9          1             0       -1.128164    0.794733    1.108372
   10          6             0       -1.670369    1.026631   -0.949623
   11          1             0       -1.806770    0.418752   -1.847004
   12          1             0       -2.610879    1.534056   -0.723581
   13          1             0       -0.930449    1.797416   -1.171575
   14          6             0        2.325854   -0.783693   -0.712327
   15          1             0        3.266400   -0.253939   -0.878124
   16          1             0        2.517532   -1.576892    0.017679
   17          1             0        2.017134   -1.253226   -1.646857
   18          6             0       -2.337578   -0.876339    0.554260
   19          1             0       -3.276138   -0.375931    0.799683
   20          1             0       -2.508803   -1.537945   -0.298011
   21          1             0       -2.056275   -1.493127    1.412604
   22          1             0        0.113118   -1.336724    0.586532
 ---------------------------------------------------------------------
 Rotational constants (GHZ):      4.1081233      1.4064148      1.3684560
 Standard basis: TZVP (5D, 7F)
 There are   223 symmetry adapted basis functions of A   symmetry.
 Integral buffers will be    131072 words long.
 Raffenetti 2 integral format.
 Two-electron integral symmetry is turned on.
   223 basis functions,   365 primitive gaussians,   230 cartesian basis functions
    29 alpha electrons       29 beta electrons
       nuclear repulsion energy       334.7583127545 Hartrees.
 NAtoms=   22 NActive=   22 NUniq=   22 SFac= 7.50D-01 NAtFMM=   80 NAOKFM=F Big=F
 One-electron integrals computed using PRISM.
 NBasis=   223 RedAO= T  NBF=   223
 NBsUse=   223 1.00D-06 NBFU=   223
 Initial guess read from the read-write file:
 Initial guess orbital symmetries:
       Occupied  (A) (A) (A) (A) (A) (A) (A) (A) (A) (A) (A) (A)
                 (A) (A) (A) (A) (A) (A) (A) (A) (A) (A) (A) (A)
                 (A) (A) (A) (A) (A)
       Virtual   (A) (A) (A) (A) (A) (A) (A) (A) (A) (A) (A) (A)
                 (A) (A) (A) (A) (A) (A) (A) (A) (A) (A) (A) (A)
                 (A) (A) (A) (A) (A) (A) (A) (A) (A) (A) (A) (A)
                 (A) (A) (A) (A) (A) (A) (A) (A) (A) (A) (A) (A)
                 (A) (A) (A) (A) (A) (A) (A) (A) (A) (A) (A) (A)
                 (A) (A) (A) (A) (A) (A) (A) (A) (A) (A) (A) (A)
                 (A) (A) (A) (A) (A) (A) (A) (A) (A) (A) (A) (A)
                 (A) (A) (A) (A) (A) (A) (A) (A) (A) (A) (A) (A)
                 (A) (A) (A) (A) (A) (A) (A) (A) (A) (A) (A) (A)
                 (A) (A) (A) (A) (A) (A) (A) (A) (A) (A) (A) (A)
                 (A) (A) (A) (A) (A) (A) (A) (A) (A) (A) (A) (A)
                 (A) (A) (A) (A) (A) (A) (A) (A) (A) (A) (A) (A)
                 (A) (A) (A) (A) (A) (A) (A) (A) (A) (A) (A) (A)
                 (A) (A) (A) (A) (A) (A) (A) (A) (A) (A) (A) (A)
                 (A) (A) (A) (A) (A) (A) (A) (A) (A) (A) (A) (A)
                 (A) (A) (A) (A) (A) (A) (A) (A) (A) (A) (A) (A)
                 (A) (A)
 Harris functional with IExCor=  402 diagonalized for initial guess.
 ExpMin= 9.52D-02 ExpMax= 1.97D+04 ExpMxC= 6.73D+02 IAcc=2 IRadAn=         4 AccDes= 0.00D+00
 HarFok:  IExCor= 402 AccDes= 0.00D+00 IRadAn=         4 IDoV=1
 ScaDFX=  1.000000  1.000000  1.000000  1.000000
 Requested convergence on RMS density matrix=1.00D-08 within 128 cycles.
 Requested convergence on MAX density matrix=1.00D-06.
 Requested convergence on             energy=1.00D-06.
 No special actions if energy rises.
 Keep R1 integrals in memory in canonical form, NReq=   360237084.
 Integral accuracy reduced to 1.0D-05 until final iterations.
 Initial convergence to 1.0D-05 achieved.  Increase integral accuracy.
 SCF Done:  E(RB+HF-LYP) =  -292.532672944     A.U. after   14 cycles
             Convg  =    0.3151D-08             -V/T =  2.0057
             S**2   =   0.0000
 Range of M.O.s used for correlation:     1   223
 NBasis=   223 NAE=    29 NBE=    29 NFC=     0 NFV=     0
 NROrb=    223 NOA=    29 NOB=    29 NVA=   194 NVB=   194

 **** Warning!!: The largest alpha MO coefficient is  0.15164683D+02

 Symmetrizing basis deriv contribution to polar:
 IMax=3 JMax=2 DiffMx= 0.00D+00
 G2DrvN: will do   23 centers at a time, making    1 passes doing MaxLOS=2.
 FoFDir/FoFCou used for L=0 through L=2.
 DoAtom=TTTTTTTTTTTTTTTTTTTTTT
          Differentiating once with respect to electric field.
                with respect to dipole field.
          Differentiating once with respect to nuclear coordinates.
          Store integrals in memory, NReq=   353689553.
          There are  69 degrees of freedom in the 1st order CPHF.
    66 vectors were produced by pass  0.
 AX will form  66 AO Fock derivatives at one time.
    66 vectors were produced by pass  1.
    66 vectors were produced by pass  2.
    66 vectors were produced by pass  3.
    66 vectors were produced by pass  4.
    31 vectors were produced by pass  5.
     3 vectors were produced by pass  6.
     1 vectors were produced by pass  7.
 Inv2:  IOpt= 1 Iter= 1 AM= 2.88D-15 Conv= 1.00D-12.
 Inverted reduced A of dimension  365 with in-core refinement.
 Isotropic polarizability for W=    0.000000       83.35 Bohr**3.
 End of Minotr Frequency-dependent properties file   721 does not exist.
 ***** Axes restored to original set *****
 -------------------------------------------------------------------
 Center     Atomic                   Forces (Hartrees/Bohr)
 Number     Number              X              Y              Z
 -------------------------------------------------------------------
    1          7           0.000129267   -0.000008053   -0.000039442
    2          6           0.000117892    0.000289211    0.000004957
    3          1          -0.000134883   -0.000019480    0.000019344
    4          6          -0.000029760   -0.000078195    0.000048551
    5          1          -0.000045713   -0.000051920   -0.000049067
    6          1          -0.000090000   -0.000060210    0.000035677
    7          1          -0.000025222    0.000019706   -0.000037830
    8          6          -0.000096764    0.000003470   -0.000045388
    9          1           0.000152657   -0.000027819   -0.000054659
   10          6          -0.000042881    0.000085634   -0.000028864
   11          1          -0.000050877   -0.000002909    0.000026090
   12          1          -0.000079304   -0.000063171   -0.000011473
   13          1           0.000138809    0.000028591   -0.000032063
   14          6           0.000156195   -0.000066472   -0.000009283
   15          1           0.000028299   -0.000011084    0.000027478
   16          1          -0.000058278    0.000026581   -0.000005960
   17          1          -0.000013594    0.000030366   -0.000025685
   18          6          -0.000005972    0.000051152    0.000122905
   19          1          -0.000019776   -0.000025372    0.000054792
   20          1           0.000005818   -0.000031963    0.000020329
   21          1           0.000012004   -0.000023163    0.000004861
   22          1          -0.000047918   -0.000064897   -0.000025274
 -------------------------------------------------------------------
 Cartesian Forces:  Max     0.000289211 RMS     0.000069386

 GradGradGradGradGradGradGradGradGradGradGradGradGradGradGradGradGradGrad
 Berny optimization.
 Internal  Forces:  Max     0.000586214 RMS     0.000090563
 Search for a local minimum.
 Step number   7 out of a maximum of 118
 All quantities printed in internal units (Hartrees-Bohrs-Radians)
 Second derivative matrix not updated -- analytic derivatives used.
 Trust test= 1.03D+00 RLast= 2.94D-01 DXMaxT set to 1.00D+00
     Eigenvalues ---    0.00080   0.00204   0.00272   0.00299   0.00307
     Eigenvalues ---    0.00494   0.01803   0.03981   0.04188   0.04394
     Eigenvalues ---    0.04425   0.04489   0.04527   0.04601   0.04616
     Eigenvalues ---    0.04641   0.04656   0.04771   0.05164   0.05463
     Eigenvalues ---    0.05484   0.11057   0.11870   0.11987   0.12280
     Eigenvalues ---    0.12418   0.12597   0.12945   0.12990   0.13603
     Eigenvalues ---    0.14155   0.14281   0.14768   0.14962   0.18510
     Eigenvalues ---    0.18876   0.19332   0.19965   0.23988   0.26408
     Eigenvalues ---    0.27928   0.28526   0.28991   0.29721   0.32360
     Eigenvalues ---    0.32808   0.33016   0.33027   0.33268   0.33350
     Eigenvalues ---    0.33417   0.33520   0.33608   0.34090   0.34202
     Eigenvalues ---    0.34273   0.34418   0.34531   0.36847   0.43654
     Eigenvalues --- 1000.000001000.000001000.000001000.000001000.00000
     Eigenvalues --- 1000.000001000.000001000.000001000.000001000.00000
     Eigenvalues --- 1000.000001000.000001000.000001000.000001000.00000
     Eigenvalues --- 1000.000001000.000001000.000001000.000001000.00000
     Eigenvalues --- 1000.000001000.000001000.000001000.000001000.00000
     Eigenvalues --- 1000.000001000.000001000.000001000.000001000.00000
     Eigenvalues --- 1000.000001000.000001000.000001000.000001000.00000
     Eigenvalues --- 1000.000001000.000001000.000001000.000001000.00000
     Eigenvalues --- 1000.000001000.000001000.000001000.000001000.00000
     Eigenvalues --- 1000.000001000.000001000.00000
 RFO step:  Lambda=-1.13785408D-05.
 Quintic linear search produced a step of -0.04255.
 Iteration  1 RMS(Cart)=  0.01247079 RMS(Int)=  0.00004025
 Iteration  2 RMS(Cart)=  0.00006436 RMS(Int)=  0.00000039
 Iteration  3 RMS(Cart)=  0.00000000 RMS(Int)=  0.00000039
 Variable       Old X    -DE/DX   Delta X   Delta X   Delta X     New X
                                 (Linear)    (Quad)   (Total)
    R1        2.77445  -0.00001  -0.00003   0.00067   0.00064   2.77509
    R2        2.77317   0.00003  -0.00006   0.00058   0.00052   2.77369
    R3        1.91868  -0.00002  -0.00002  -0.00001  -0.00002   1.91866
    R4        2.06655   0.00007   0.00003   0.00031   0.00035   2.06689
    R5        2.90606  -0.00020  -0.00002  -0.00069  -0.00071   2.90535
    R6        2.88918   0.00010  -0.00002   0.00013   0.00010   2.88929
    R7        2.06558  -0.00003   0.00000  -0.00009  -0.00010   2.06548
    R8        2.06254   0.00005  -0.00001   0.00001   0.00000   2.06254
    R9        2.06856  -0.00005  -0.00001  -0.00015  -0.00016   2.06840
   R10        2.08408  -0.00003  -0.00001  -0.00032  -0.00033   2.08375
   R11        2.89095   0.00007   0.00005   0.00000   0.00005   2.89100
   R12        2.88838   0.00014  -0.00006   0.00020   0.00014   2.88853
   R13        2.06440  -0.00001  -0.00002   0.00005   0.00004   2.06444
   R14        2.06416   0.00005   0.00003   0.00006   0.00009   2.06425
   R15        2.06219   0.00007   0.00002   0.00014   0.00015   2.06234
   R16        2.06383  -0.00001   0.00001  -0.00012  -0.00012   2.06371
   R17        2.06907  -0.00005   0.00000  -0.00012  -0.00012   2.06895
   R18        2.06068   0.00000  -0.00001   0.00004   0.00003   2.06071
   R19        2.06278   0.00004  -0.00002   0.00016   0.00014   2.06292
   R20        2.06440   0.00001   0.00002   0.00003   0.00005   2.06445
   R21        2.06691   0.00001   0.00000   0.00004   0.00004   2.06695
    A1        2.07131  -0.00059  -0.00035  -0.00130  -0.00165   2.06966
    A2        1.90236   0.00023   0.00010   0.00029   0.00039   1.90275
    A3        1.90926   0.00012   0.00027  -0.00068  -0.00041   1.90885
    A4        1.86707  -0.00002  -0.00005  -0.00072  -0.00077   1.86630
    A5        2.00125  -0.00016  -0.00010   0.00056   0.00046   2.00171
    A6        1.89109   0.00009   0.00014  -0.00078  -0.00064   1.89045
    A7        1.88643   0.00001  -0.00001  -0.00006  -0.00007   1.88636
    A8        1.87737   0.00003   0.00008   0.00063   0.00072   1.87808
    A9        1.93571   0.00006  -0.00005   0.00035   0.00030   1.93601
   A10        1.93669  -0.00009   0.00000  -0.00115  -0.00115   1.93554
   A11        1.95421  -0.00010   0.00001  -0.00040  -0.00039   1.95381
   A12        1.92933   0.00004  -0.00004   0.00072   0.00068   1.93001
   A13        1.87592   0.00010  -0.00001   0.00029   0.00028   1.87620
   A14        1.88095   0.00004   0.00001   0.00050   0.00052   1.88147
   A15        1.88397   0.00003   0.00003   0.00009   0.00013   1.88410
   A16        1.95331  -0.00010  -0.00003  -0.00187  -0.00189   1.95141
   A17        1.93475  -0.00010  -0.00027  -0.00018  -0.00045   1.93430
   A18        1.88867   0.00013   0.00023   0.00094   0.00117   1.88984
   A19        1.87990   0.00005   0.00001   0.00025   0.00026   1.88016
   A20        1.87497  -0.00007   0.00002  -0.00070  -0.00067   1.87430
   A21        1.93174   0.00009   0.00003   0.00156   0.00160   1.93333
   A22        1.92276   0.00004  -0.00004   0.00021   0.00017   1.92293
   A23        1.92505   0.00009   0.00013   0.00072   0.00086   1.92591
   A24        1.95690  -0.00017  -0.00013  -0.00124  -0.00137   1.95553
   A25        1.89756  -0.00007   0.00006  -0.00082  -0.00076   1.89679
   A26        1.88664   0.00004  -0.00007   0.00010   0.00003   1.88667
   A27        1.87317   0.00008   0.00005   0.00103   0.00108   1.87424
   A28        1.93955   0.00003   0.00003   0.00006   0.00010   1.93965
   A29        1.93212  -0.00005  -0.00007  -0.00044  -0.00051   1.93161
   A30        1.92882   0.00000  -0.00002   0.00038   0.00037   1.92918
   A31        1.87743   0.00000   0.00000  -0.00015  -0.00015   1.87728
   A32        1.89924  -0.00001   0.00004  -0.00016  -0.00012   1.89912
   A33        1.88496   0.00003   0.00002   0.00030   0.00031   1.88527
   A34        1.93410   0.00005  -0.00002   0.00020   0.00018   1.93428
   A35        1.92678   0.00004   0.00005   0.00065   0.00070   1.92748
   A36        1.94064   0.00000   0.00002  -0.00036  -0.00034   1.94030
   A37        1.89471  -0.00003  -0.00011   0.00006  -0.00005   1.89466
   A38        1.87885  -0.00003   0.00001  -0.00019  -0.00018   1.87867
   A39        1.88707  -0.00003   0.00005  -0.00038  -0.00034   1.88674
    D1       -0.99341  -0.00006   0.00183  -0.01939  -0.01757  -1.01097
    D2        1.09787  -0.00016   0.00172  -0.01962  -0.01791   1.07997
    D3       -3.01281  -0.00013   0.00169  -0.01937  -0.01769  -3.03049
    D4        3.08970   0.00005   0.00164  -0.01764  -0.01600   3.07370
    D5       -1.10221  -0.00006   0.00153  -0.01787  -0.01634  -1.11855
    D6        1.07030  -0.00002   0.00150  -0.01762  -0.01612   1.05418
    D7       -0.89434   0.00005   0.00380  -0.00500  -0.00120  -0.89554
    D8        1.20484  -0.00002   0.00361  -0.00607  -0.00245   1.20239
    D9       -2.95697   0.00011   0.00363  -0.00363   0.00000  -2.95697
   D10        1.30243   0.00000   0.00390  -0.00629  -0.00239   1.30004
   D11       -2.88157  -0.00008   0.00371  -0.00736  -0.00365  -2.88522
   D12       -0.76019   0.00005   0.00373  -0.00493  -0.00119  -0.76139
   D13       -3.11515   0.00008   0.00030   0.00218   0.00248  -3.11267
   D14       -1.01908   0.00007   0.00029   0.00148   0.00177  -1.01731
   D15        1.08216   0.00007   0.00031   0.00182   0.00213   1.08429
   D16       -1.03467  -0.00004   0.00016   0.00158   0.00175  -1.03292
   D17        1.06139  -0.00005   0.00016   0.00088   0.00104   1.06243
   D18       -3.12055  -0.00006   0.00017   0.00123   0.00140  -3.11915
   D19        1.01931   0.00003   0.00023   0.00252   0.00275   1.02206
   D20        3.11537   0.00002   0.00022   0.00182   0.00204   3.11741
   D21       -1.06657   0.00002   0.00024   0.00216   0.00240  -1.06417
   D22        3.07910   0.00007  -0.00079   0.00590   0.00511   3.08422
   D23       -1.11892   0.00006  -0.00081   0.00547   0.00466  -1.11426
   D24        0.96869   0.00006  -0.00085   0.00580   0.00496   0.97364
   D25        1.06642   0.00003  -0.00084   0.00680   0.00597   1.07238
   D26       -3.13160   0.00002  -0.00087   0.00637   0.00551  -3.12610
   D27       -1.04400   0.00002  -0.00090   0.00671   0.00581  -1.03819
   D28       -0.99308  -0.00003  -0.00085   0.00630   0.00545  -0.98763
   D29        1.09208  -0.00004  -0.00088   0.00587   0.00499   1.09707
   D30       -3.10350  -0.00004  -0.00091   0.00620   0.00529  -3.09821
   D31        1.00547   0.00011   0.00227  -0.00042   0.00186   1.00733
   D32        3.10033   0.00009   0.00241  -0.00084   0.00157   3.10190
   D33       -1.09643   0.00014   0.00247   0.00014   0.00261  -1.09382
   D34       -3.13538  -0.00005   0.00208  -0.00268  -0.00060  -3.13598
   D35       -1.04052  -0.00006   0.00222  -0.00310  -0.00089  -1.04140
   D36        1.04591  -0.00002   0.00228  -0.00213   0.00016   1.04606
   D37       -1.09041  -0.00005   0.00214  -0.00251  -0.00037  -1.09078
   D38        1.00445  -0.00006   0.00227  -0.00293  -0.00066   1.00379
   D39        3.09087  -0.00002   0.00234  -0.00196   0.00038   3.09125
   D40        3.13605  -0.00005   0.00063  -0.00334  -0.00271   3.13334
   D41       -1.04737  -0.00003   0.00051  -0.00271  -0.00220  -1.04957
   D42        1.04708  -0.00004   0.00061  -0.00300  -0.00238   1.04470
   D43        1.02410   0.00004   0.00051  -0.00124  -0.00073   1.02337
   D44        3.12386   0.00006   0.00040  -0.00061  -0.00021   3.12364
   D45       -1.06487   0.00004   0.00050  -0.00089  -0.00039  -1.06527
   D46       -1.02390  -0.00003   0.00046  -0.00198  -0.00152  -1.02542
   D47        1.07586  -0.00001   0.00035  -0.00136  -0.00101   1.07485
   D48       -3.11287  -0.00002   0.00045  -0.00164  -0.00119  -3.11406
         Item               Value     Threshold  Converged?
 Maximum Force            0.000586     0.000015     NO 
 RMS     Force            0.000091     0.000010     NO 
 Maximum Displacement     0.039817     0.000060     NO 
 RMS     Displacement     0.012474     0.000040     NO 
 Predicted change in Energy=-6.002334D-06
 GradGradGradGradGradGradGradGradGradGradGradGradGradGradGradGradGradGrad

                          Input orientation:                          
 ---------------------------------------------------------------------
 Center     Atomic     Atomic              Coordinates (Angstroms)
 Number     Number      Type              X           Y           Z
 ---------------------------------------------------------------------
    1          7             0       -0.085701   -0.327316   -0.041384
    2          6             0        0.596420    0.738957   -0.785900
    3          1             0       -0.138812    1.168809   -1.472163
    4          6             0        1.155939    1.874593    0.086456
    5          1             0        1.623302    2.646209   -0.530668
    6          1             0        0.375891    2.356036    0.678907
    7          1             0        1.915264    1.491946    0.775691
    8          6             0       -1.282231    0.014487    0.736976
    9          1             0       -1.104057    0.872167    1.406693
   10          6             0       -2.446240    0.378632   -0.186567
   11          1             0       -2.661214   -0.449230   -0.866189
   12          1             0       -3.343207    0.592405    0.399085
   13          1             0       -2.230725    1.263587   -0.787764
   14          6             0        1.701496    0.103999   -1.630477
   15          1             0        2.202722    0.851312   -2.249276
   16          1             0        2.460317   -0.357584   -0.990312
   17          1             0        1.290314   -0.670674   -2.278522
   18          6             0       -1.641436   -1.183931    1.615161
   19          1             0       -2.524513   -0.970708    2.220480
   20          1             0       -1.846826   -2.061403    0.997646
   21          1             0       -0.823809   -1.432607    2.297809
   22          1             0        0.586391   -0.792352    0.561019
 ---------------------------------------------------------------------
                    Distance matrix (angstroms):
                    1          2          3          4          5
     1  N    0.000000
     2  C    1.468514   0.000000
     3  H    2.070831   1.093753   0.000000
     4  C    2.531091   1.537445   2.145648   0.000000
     5  H    3.464382   2.181110   2.484788   1.093005   0.000000
     6  H    2.816427   2.192997   2.510284   1.091449   1.761620
     7  H    2.825100   2.178281   3.062106   1.094549   1.767523
     8  C    1.467772   2.524547   2.742291   3.134940   4.120073
     9  H    2.138396   2.777919   3.050821   2.802761   3.786698
    10  C    2.468113   3.121989   2.757056   3.910005   4.671347
    11  H    2.707108   3.468489   3.057412   4.569283   5.296357
    12  H    3.413392   4.116592   3.755257   4.688717   5.454243
    13  H    2.772937   2.875411   2.203062   3.550646   4.102593
    14  C    2.430088   1.528946   2.132046   2.525965   2.771015
    15  H    3.391288   2.175844   2.487466   2.756538   2.551665
    16  H    2.717277   2.172164   3.052463   2.800615   3.151926
    17  H    2.648792   2.167134   2.465018   3.477005   3.763986
    18  C    2.428629   3.804023   4.162311   4.417785   5.471112
    19  H    3.387888   4.658487   4.889244   5.118157   6.152663
    20  H    2.681082   4.122196   4.410389   5.033779   6.044761
    21  H    2.690407   4.030136   4.631336   4.443766   5.534019
    22  H    1.015310   2.039411   2.916487   2.768066   3.753753
                    6          7          8          9         10
     6  H    0.000000
     7  H    1.767962   0.000000
     8  C    2.869772   3.522550   0.000000
     9  H    2.218510   3.146203   1.102671   0.000000
    10  C    3.552969   4.603056   1.529853   2.140913   0.000000
    11  H    4.413711   5.235273   2.164894   3.055622   1.092454
    12  H    4.125577   5.348133   2.166976   2.471302   1.092354
    13  H    3.184182   4.436864   2.187401   2.497645   1.091343
    14  C    3.487429   2.785990   3.809918   4.205428   4.400457
    15  H    3.765071   3.105394   4.665069   4.929638   5.107939
    16  H    3.807211   2.614692   4.138675   4.467963   5.026164
    17  H    4.329380   3.794168   4.022519   4.657702   4.408985
    18  C    4.180615   4.529364   1.528543   2.135363   2.517049
    19  H    4.675041   5.278608   2.171326   2.464981   2.760565
    20  H    4.955384   5.179660   2.167033   3.053663   2.777665
    21  H    4.291146   4.286300   2.177253   2.486888   3.476347
    22  H    3.157618   2.651416   2.042963   2.518612   3.335706
                   11         12         13         14         15
    11  H    0.000000
    12  H    1.775116   0.000000
    13  H    1.767827   1.759748   0.000000
    14  C    4.463568   5.459551   4.185353   0.000000
    15  H    5.221323   6.151274   4.686303   1.092070   0.000000
    16  H    5.123855   6.042665   4.967404   1.094842   1.764306
    17  H    4.202177   5.498587   4.285025   1.090482   1.774764
    18  C    2.781516   2.744128   3.480181   4.834059   5.818388
    19  H    3.133393   2.535954   3.758712   5.817562   6.756125
    20  H    2.595421   3.104855   3.793497   4.917986   5.951912
    21  H    3.788664   3.748759   4.332394   4.916274   5.920486
    22  H    3.563929   4.169594   3.739283   2.617166   3.634820
                   16         17         18         19         20
    16  H    0.000000
    17  H    1.768168   0.000000
    18  C    4.929069   4.900955   0.000000
    19  H    5.961010   5.906263   1.091651   0.000000
    20  H    5.040482   4.744370   1.092459   1.773189   0.000000
    21  H    4.770000   5.098319   1.093783   1.764009   1.769851
    22  H    2.471285   2.928020   2.495548   3.530347   2.778791
                   21         22
    21  H    0.000000
    22  H    2.327022   0.000000
 Stoichiometry    C6H15N
 Framework group  C1[X(C6H15N)]
 Deg. of freedom    60
 Full point group                 C1
 Largest Abelian subgroup         C1      NOp   1
 Largest concise Abelian subgroup C1      NOp   1
                         Standard orientation:                         
 ---------------------------------------------------------------------
 Center     Atomic     Atomic              Coordinates (Angstroms)
 Number     Number      Type              X           Y           Z
 ---------------------------------------------------------------------
    1          7             0       -0.013514   -0.591213   -0.089957
    2          6             0        1.240517    0.163482   -0.209847
    3          1             0        1.087227    0.913957   -0.990608
    4          6             0        1.677253    0.891060    1.072194
    5          1             0        2.598824    1.454724    0.905919
    6          1             0        0.919641    1.595815    1.419478
    7          1             0        1.864594    0.173375    1.877097
    8          6             0       -1.246228    0.140701    0.224803
    9          1             0       -1.123422    0.789108    1.108189
   10          6             0       -1.667184    1.027237   -0.948781
   11          1             0       -1.806105    0.421818   -1.847461
   12          1             0       -2.606197    1.537147   -0.721880
   13          1             0       -0.923919    1.795397   -1.169049
   14          6             0        2.331666   -0.791685   -0.694331
   15          1             0        3.274025   -0.263790   -0.855275
   16          1             0        2.515106   -1.576628    0.046541
   17          1             0        2.033550   -1.271351   -1.627176
   18          6             0       -2.337709   -0.877588    0.553742
   19          1             0       -3.274403   -0.375558    0.803283
   20          1             0       -2.513361   -1.537384   -0.299066
   21          1             0       -2.055188   -1.496795    1.409970
   22          1             0        0.114339   -1.340585    0.583059
 ---------------------------------------------------------------------
 Rotational constants (GHZ):      4.1093190      1.4109232      1.3670574
 Standard basis: TZVP (5D, 7F)
 There are   223 symmetry adapted basis functions of A   symmetry.
 Integral buffers will be    131072 words long.
 Raffenetti 2 integral format.
 Two-electron integral symmetry is turned on.
   223 basis functions,   365 primitive gaussians,   230 cartesian basis functions
    29 alpha electrons       29 beta electrons
       nuclear repulsion energy       334.8304905627 Hartrees.
 NAtoms=   22 NActive=   22 NUniq=   22 SFac= 7.50D-01 NAtFMM=   80 NAOKFM=F Big=F
 One-electron integrals computed using PRISM.
 NBasis=   223 RedAO= T  NBF=   223
 NBsUse=   223 1.00D-06 NBFU=   223
 Initial guess read from the read-write file:
 Initial guess orbital symmetries:
       Occupied  (A) (A) (A) (A) (A) (A) (A) (A) (A) (A) (A) (A)
                 (A) (A) (A) (A) (A) (A) (A) (A) (A) (A) (A) (A)
                 (A) (A) (A) (A) (A)
       Virtual   (A) (A) (A) (A) (A) (A) (A) (A) (A) (A) (A) (A)
                 (A) (A) (A) (A) (A) (A) (A) (A) (A) (A) (A) (A)
                 (A) (A) (A) (A) (A) (A) (A) (A) (A) (A) (A) (A)
                 (A) (A) (A) (A) (A) (A) (A) (A) (A) (A) (A) (A)
                 (A) (A) (A) (A) (A) (A) (A) (A) (A) (A) (A) (A)
                 (A) (A) (A) (A) (A) (A) (A) (A) (A) (A) (A) (A)
                 (A) (A) (A) (A) (A) (A) (A) (A) (A) (A) (A) (A)
                 (A) (A) (A) (A) (A) (A) (A) (A) (A) (A) (A) (A)
                 (A) (A) (A) (A) (A) (A) (A) (A) (A) (A) (A) (A)
                 (A) (A) (A) (A) (A) (A) (A) (A) (A) (A) (A) (A)
                 (A) (A) (A) (A) (A) (A) (A) (A) (A) (A) (A) (A)
                 (A) (A) (A) (A) (A) (A) (A) (A) (A) (A) (A) (A)
                 (A) (A) (A) (A) (A) (A) (A) (A) (A) (A) (A) (A)
                 (A) (A) (A) (A) (A) (A) (A) (A) (A) (A) (A) (A)
                 (A) (A) (A) (A) (A) (A) (A) (A) (A) (A) (A) (A)
                 (A) (A) (A) (A) (A) (A) (A) (A) (A) (A) (A) (A)
                 (A) (A)
 Harris functional with IExCor=  402 diagonalized for initial guess.
 ExpMin= 9.52D-02 ExpMax= 1.97D+04 ExpMxC= 6.73D+02 IAcc=2 IRadAn=         4 AccDes= 0.00D+00
 HarFok:  IExCor= 402 AccDes= 0.00D+00 IRadAn=         4 IDoV=1
 ScaDFX=  1.000000  1.000000  1.000000  1.000000
 Requested convergence on RMS density matrix=1.00D-08 within 128 cycles.
 Requested convergence on MAX density matrix=1.00D-06.
 Requested convergence on             energy=1.00D-06.
 No special actions if energy rises.
 Keep R1 integrals in memory in canonical form, NReq=   360237084.
 Integral accuracy reduced to 1.0D-05 until final iterations.
 Initial convergence to 1.0D-05 achieved.  Increase integral accuracy.
 SCF Done:  E(RB+HF-LYP) =  -292.532678473     A.U. after    9 cycles
             Convg  =    0.7861D-08             -V/T =  2.0057
             S**2   =   0.0000
 Range of M.O.s used for correlation:     1   223
 NBasis=   223 NAE=    29 NBE=    29 NFC=     0 NFV=     0
 NROrb=    223 NOA=    29 NOB=    29 NVA=   194 NVB=   194

 **** Warning!!: The largest alpha MO coefficient is  0.15174560D+02

 Symmetrizing basis deriv contribution to polar:
 IMax=3 JMax=2 DiffMx= 0.00D+00
 G2DrvN: will do   23 centers at a time, making    1 passes doing MaxLOS=2.
 FoFDir/FoFCou used for L=0 through L=2.
 DoAtom=TTTTTTTTTTTTTTTTTTTTTT
          Differentiating once with respect to electric field.
                with respect to dipole field.
          Differentiating once with respect to nuclear coordinates.
          Store integrals in memory, NReq=   353689553.
          There are  69 degrees of freedom in the 1st order CPHF.
    66 vectors were produced by pass  0.
 AX will form  66 AO Fock derivatives at one time.
    66 vectors were produced by pass  1.
    66 vectors were produced by pass  2.
    66 vectors were produced by pass  3.
    66 vectors were produced by pass  4.
    31 vectors were produced by pass  5.
     3 vectors were produced by pass  6.
     1 vectors were produced by pass  7.
 Inv2:  IOpt= 1 Iter= 1 AM= 2.68D-15 Conv= 1.00D-12.
 Inverted reduced A of dimension  365 with in-core refinement.
 Isotropic polarizability for W=    0.000000       83.34 Bohr**3.
 End of Minotr Frequency-dependent properties file   721 does not exist.
 ***** Axes restored to original set *****
 -------------------------------------------------------------------
 Center     Atomic                   Forces (Hartrees/Bohr)
 Number     Number              X              Y              Z
 -------------------------------------------------------------------
    1          7          -0.000015658    0.000007901    0.000003397
    2          6           0.000009676    0.000012704    0.000005632
    3          1           0.000001843    0.000001527    0.000002798
    4          6           0.000002748    0.000001224    0.000001660
    5          1          -0.000003333   -0.000000257    0.000000108
    6          1          -0.000000798   -0.000001788   -0.000001925
    7          1          -0.000003087    0.000000640    0.000001007
    8          6           0.000004703    0.000000984   -0.000012350
    9          1          -0.000004476   -0.000002784    0.000004277
   10          6          -0.000001374   -0.000007960    0.000003961
   11          1           0.000000368   -0.000002125    0.000004266
   12          1           0.000001360    0.000000062    0.000003944
   13          1          -0.000005235   -0.000000084    0.000003564
   14          6          -0.000008633    0.000007196   -0.000004096
   15          1          -0.000002691    0.000005452   -0.000000437
   16          1           0.000003290    0.000001858   -0.000004189
   17          1           0.000000947    0.000003389   -0.000003797
   18          6           0.000007962    0.000005826   -0.000005587
   19          1           0.000005016   -0.000006733    0.000000135
   20          1           0.000001327   -0.000008864    0.000000105
   21          1           0.000003133   -0.000009049    0.000002931
   22          1           0.000002910   -0.000009116   -0.000005405
 -------------------------------------------------------------------
 Cartesian Forces:  Max     0.000015658 RMS     0.000005198

 GradGradGradGradGradGradGradGradGradGradGradGradGradGradGradGradGradGrad
 Berny optimization.
 Internal  Forces:  Max     0.000019366 RMS     0.000003732
 Search for a local minimum.
 Step number   8 out of a maximum of 118
 All quantities printed in internal units (Hartrees-Bohrs-Radians)
 Second derivative matrix not updated -- analytic derivatives used.
 Trust test= 9.21D-01 RLast= 4.59D-02 DXMaxT set to 1.00D+00
     Eigenvalues ---    0.00085   0.00204   0.00273   0.00297   0.00306
     Eigenvalues ---    0.00496   0.01823   0.03986   0.04176   0.04397
     Eigenvalues ---    0.04425   0.04490   0.04526   0.04601   0.04616
     Eigenvalues ---    0.04639   0.04653   0.04769   0.05158   0.05477
     Eigenvalues ---    0.05495   0.11053   0.11879   0.11989   0.12286
     Eigenvalues ---    0.12416   0.12603   0.12948   0.12985   0.13622
     Eigenvalues ---    0.14156   0.14288   0.14775   0.14967   0.18513
     Eigenvalues ---    0.18899   0.19356   0.19990   0.24133   0.26436
     Eigenvalues ---    0.27916   0.28541   0.28964   0.29740   0.32376
     Eigenvalues ---    0.32824   0.33018   0.33029   0.33266   0.33345
     Eigenvalues ---    0.33414   0.33509   0.33617   0.34080   0.34206
     Eigenvalues ---    0.34271   0.34413   0.34523   0.37001   0.43653
     Eigenvalues --- 1000.000001000.000001000.000001000.000001000.00000
     Eigenvalues --- 1000.000001000.000001000.000001000.000001000.00000
     Eigenvalues --- 1000.000001000.000001000.000001000.000001000.00000
     Eigenvalues --- 1000.000001000.000001000.000001000.000001000.00000
     Eigenvalues --- 1000.000001000.000001000.000001000.000001000.00000
     Eigenvalues --- 1000.000001000.000001000.000001000.000001000.00000
     Eigenvalues --- 1000.000001000.000001000.000001000.000001000.00000
     Eigenvalues --- 1000.000001000.000001000.000001000.000001000.00000
     Eigenvalues --- 1000.000001000.000001000.000001000.000001000.00000
     Eigenvalues --- 1000.000001000.000001000.00000
 RFO step:  Lambda=-1.04725145D-07.
 Quintic linear search produced a step of -0.01179.
 Iteration  1 RMS(Cart)=  0.00264243 RMS(Int)=  0.00000188
 Iteration  2 RMS(Cart)=  0.00000298 RMS(Int)=  0.00000000
 Iteration  3 RMS(Cart)=  0.00000000 RMS(Int)=  0.00000000
 Variable       Old X    -DE/DX   Delta X   Delta X   Delta X     New X
                                 (Linear)    (Quad)   (Total)
    R1        2.77509   0.00001  -0.00001   0.00002   0.00001   2.77510
    R2        2.77369   0.00000  -0.00001  -0.00004  -0.00005   2.77364
    R3        1.91866   0.00000   0.00000  -0.00001  -0.00001   1.91865
    R4        2.06689   0.00000   0.00000   0.00000  -0.00001   2.06689
    R5        2.90535  -0.00001   0.00001  -0.00001  -0.00001   2.90534
    R6        2.88929   0.00000   0.00000   0.00001   0.00001   2.88930
    R7        2.06548   0.00000   0.00000  -0.00001   0.00000   2.06547
    R8        2.06254   0.00000   0.00000  -0.00001  -0.00001   2.06253
    R9        2.06840   0.00000   0.00000  -0.00001  -0.00001   2.06839
   R10        2.08375   0.00000   0.00000  -0.00001  -0.00001   2.08374
   R11        2.89100   0.00000   0.00000   0.00002   0.00002   2.89102
   R12        2.88853   0.00000   0.00000   0.00000   0.00000   2.88853
   R13        2.06444   0.00000   0.00000  -0.00002  -0.00002   2.06442
   R14        2.06425   0.00000   0.00000   0.00001   0.00001   2.06426
   R15        2.06234   0.00000   0.00000   0.00001   0.00000   2.06234
   R16        2.06371   0.00000   0.00000   0.00000   0.00001   2.06372
   R17        2.06895   0.00000   0.00000   0.00000   0.00000   2.06895
   R18        2.06071   0.00000   0.00000   0.00000   0.00000   2.06071
   R19        2.06292   0.00000   0.00000  -0.00001  -0.00001   2.06291
   R20        2.06445   0.00000   0.00000   0.00003   0.00003   2.06448
   R21        2.06695   0.00000   0.00000   0.00002   0.00001   2.06696
    A1        2.06966   0.00002   0.00002  -0.00004  -0.00002   2.06964
    A2        1.90275  -0.00001   0.00000   0.00003   0.00002   1.90278
    A3        1.90885   0.00000   0.00000   0.00016   0.00016   1.90901
    A4        1.86630   0.00000   0.00001  -0.00003  -0.00002   1.86628
    A5        2.00171   0.00000  -0.00001  -0.00004  -0.00005   2.00167
    A6        1.89045   0.00000   0.00001   0.00006   0.00007   1.89052
    A7        1.88636   0.00000   0.00000  -0.00001  -0.00001   1.88635
    A8        1.87808   0.00000  -0.00001   0.00003   0.00003   1.87811
    A9        1.93601   0.00000   0.00000  -0.00001  -0.00001   1.93600
   A10        1.93554   0.00000   0.00001  -0.00002  -0.00001   1.93553
   A11        1.95381   0.00000   0.00000  -0.00002  -0.00002   1.95380
   A12        1.93001   0.00000  -0.00001   0.00000  -0.00001   1.93000
   A13        1.87620   0.00000   0.00000   0.00001   0.00000   1.87620
   A14        1.88147   0.00000  -0.00001   0.00001   0.00001   1.88147
   A15        1.88410   0.00000   0.00000   0.00003   0.00003   1.88413
   A16        1.95141   0.00000   0.00002   0.00000   0.00003   1.95144
   A17        1.93430   0.00001   0.00001  -0.00003  -0.00003   1.93428
   A18        1.88984   0.00000  -0.00001   0.00010   0.00008   1.88993
   A19        1.88016   0.00000   0.00000   0.00002   0.00002   1.88018
   A20        1.87430   0.00000   0.00001  -0.00006  -0.00005   1.87425
   A21        1.93333   0.00000  -0.00002  -0.00004  -0.00006   1.93327
   A22        1.92293   0.00000   0.00000  -0.00003  -0.00004   1.92289
   A23        1.92591   0.00000  -0.00001   0.00006   0.00005   1.92595
   A24        1.95553   0.00001   0.00002  -0.00005  -0.00003   1.95550
   A25        1.89679   0.00000   0.00001   0.00005   0.00006   1.89685
   A26        1.88667   0.00000   0.00000  -0.00002  -0.00002   1.88665
   A27        1.87424   0.00000  -0.00001  -0.00001  -0.00002   1.87422
   A28        1.93965   0.00000   0.00000   0.00001   0.00001   1.93965
   A29        1.93161   0.00000   0.00001  -0.00002  -0.00001   1.93160
   A30        1.92918   0.00000   0.00000   0.00003   0.00002   1.92920
   A31        1.87728   0.00000   0.00000  -0.00001  -0.00001   1.87728
   A32        1.89912   0.00000   0.00000   0.00002   0.00002   1.89914
   A33        1.88527   0.00000   0.00000  -0.00002  -0.00003   1.88524
   A34        1.93428   0.00000   0.00000   0.00000  -0.00001   1.93428
   A35        1.92748   0.00001  -0.00001   0.00006   0.00005   1.92753
   A36        1.94030   0.00001   0.00000   0.00008   0.00009   1.94039
   A37        1.89466   0.00000   0.00000  -0.00011  -0.00011   1.89455
   A38        1.87867   0.00000   0.00000  -0.00003  -0.00003   1.87865
   A39        1.88674  -0.00001   0.00000  -0.00001  -0.00001   1.88673
    D1       -1.01097   0.00000   0.00021   0.00148   0.00168  -1.00929
    D2        1.07997   0.00000   0.00021   0.00142   0.00163   1.08159
    D3       -3.03049   0.00000   0.00021   0.00142   0.00163  -3.02886
    D4        3.07370   0.00000   0.00019   0.00126   0.00145   3.07515
    D5       -1.11855   0.00000   0.00019   0.00120   0.00140  -1.11715
    D6        1.05418   0.00000   0.00019   0.00121   0.00140   1.05558
    D7       -0.89554   0.00000   0.00001   0.00275   0.00276  -0.89278
    D8        1.20239   0.00001   0.00003   0.00276   0.00279   1.20518
    D9       -2.95697   0.00001   0.00000   0.00275   0.00275  -2.95421
   D10        1.30004   0.00000   0.00003   0.00290   0.00293   1.30297
   D11       -2.88522   0.00001   0.00004   0.00291   0.00295  -2.88226
   D12       -0.76139   0.00001   0.00001   0.00290   0.00292  -0.75847
   D13       -3.11267   0.00000  -0.00003   0.00007   0.00004  -3.11263
   D14       -1.01731   0.00000  -0.00002   0.00005   0.00003  -1.01728
   D15        1.08429   0.00000  -0.00003   0.00007   0.00004   1.08434
   D16       -1.03292   0.00000  -0.00002   0.00000  -0.00002  -1.03294
   D17        1.06243   0.00000  -0.00001  -0.00002  -0.00003   1.06240
   D18       -3.11915   0.00000  -0.00002   0.00000  -0.00001  -3.11916
   D19        1.02206   0.00000  -0.00003   0.00003   0.00000   1.02206
   D20        3.11741   0.00000  -0.00002   0.00001  -0.00002   3.11740
   D21       -1.06417   0.00000  -0.00003   0.00003   0.00000  -1.06417
   D22        3.08422   0.00000  -0.00006   0.00023   0.00017   3.08439
   D23       -1.11426   0.00000  -0.00005   0.00021   0.00016  -1.11411
   D24        0.97364   0.00000  -0.00006   0.00019   0.00013   0.97377
   D25        1.07238   0.00000  -0.00007   0.00021   0.00014   1.07253
   D26       -3.12610   0.00000  -0.00006   0.00020   0.00013  -3.12597
   D27       -1.03819   0.00000  -0.00007   0.00017   0.00010  -1.03809
   D28       -0.98763   0.00000  -0.00006   0.00022   0.00015  -0.98748
   D29        1.09707   0.00000  -0.00006   0.00020   0.00014   1.09721
   D30       -3.09821   0.00000  -0.00006   0.00017   0.00011  -3.09809
   D31        1.00733   0.00000  -0.00002   0.00123   0.00120   1.00853
   D32        3.10190   0.00000  -0.00002   0.00130   0.00128   3.10318
   D33       -1.09382   0.00000  -0.00003   0.00130   0.00127  -1.09255
   D34       -3.13598   0.00000   0.00001   0.00123   0.00124  -3.13474
   D35       -1.04140   0.00000   0.00001   0.00130   0.00131  -1.04009
   D36        1.04606   0.00000   0.00000   0.00130   0.00130   1.04736
   D37       -1.09078   0.00000   0.00000   0.00115   0.00116  -1.08963
   D38        1.00379   0.00000   0.00001   0.00123   0.00123   1.00502
   D39        3.09125   0.00000   0.00000   0.00123   0.00122   3.09248
   D40        3.13334   0.00000   0.00003   0.00059   0.00062   3.13396
   D41       -1.04957   0.00000   0.00003   0.00049   0.00052  -1.04905
   D42        1.04470   0.00000   0.00003   0.00057   0.00060   1.04530
   D43        1.02337   0.00000   0.00001   0.00056   0.00057   1.02394
   D44        3.12364   0.00000   0.00000   0.00047   0.00047   3.12411
   D45       -1.06527   0.00000   0.00000   0.00055   0.00055  -1.06472
   D46       -1.02542   0.00000   0.00002   0.00059   0.00061  -1.02481
   D47        1.07485   0.00000   0.00001   0.00049   0.00050   1.07536
   D48       -3.11406   0.00000   0.00001   0.00057   0.00059  -3.11347
         Item               Value     Threshold  Converged?
 Maximum Force            0.000019     0.000015     NO 
 RMS     Force            0.000004     0.000010     YES
 Maximum Displacement     0.007832     0.000060     NO 
 RMS     Displacement     0.002642     0.000040     NO 
 Predicted change in Energy=-5.406495D-08
 GradGradGradGradGradGradGradGradGradGradGradGradGradGradGradGradGradGrad

                          Input orientation:                          
 ---------------------------------------------------------------------
 Center     Atomic     Atomic              Coordinates (Angstroms)
 Number     Number      Type              X           Y           Z
 ---------------------------------------------------------------------
    1          7             0       -0.086151   -0.326703   -0.041906
    2          6             0        0.596739    0.739864   -0.785304
    3          1             0       -0.138441    1.171566   -1.470453
    4          6             0        1.158054    1.873572    0.088400
    5          1             0        1.625897    2.645581   -0.527862
    6          1             0        0.378893    2.354993    0.682026
    7          1             0        1.917372    1.489044    0.776590
    8          6             0       -1.282999    0.014977    0.735973
    9          1             0       -1.105781    0.873913    1.404328
   10          6             0       -2.447469    0.376307   -0.188110
   11          1             0       -2.662293   -0.453374   -0.865545
   12          1             0       -3.344343    0.591276    0.397260
   13          1             0       -2.232463    1.259793   -0.791649
   14          6             0        1.700607    0.104951   -1.631502
   15          1             0        2.202389    0.852659   -2.249378
   16          1             0        2.459230   -0.358544   -0.992482
   17          1             0        1.288182   -0.668223   -2.280544
   18          6             0       -1.640903   -1.182396    1.616115
   19          1             0       -2.524557   -0.969354    2.220645
   20          1             0       -1.844877   -2.061264    1.000089
   21          1             0       -0.823275   -1.428788    2.299601
   22          1             0        0.585471   -0.792517    0.560409
 ---------------------------------------------------------------------
                    Distance matrix (angstroms):
                    1          2          3          4          5
     1  N    0.000000
     2  C    1.468518   0.000000
     3  H    2.070818   1.093748   0.000000
     4  C    2.531054   1.537441   2.145632   0.000000
     5  H    3.464351   2.181100   2.484771   1.093002   0.000000
     6  H    2.816351   2.192978   2.510239   1.091444   1.761615
     7  H    2.825062   2.178269   3.062085   1.094546   1.767521
     8  C    1.467748   2.524512   2.741536   3.135676   4.120562
     9  H    2.138392   2.776875   3.047738   2.802844   3.786057
    10  C    2.468080   3.123462   2.758341   3.913829   4.675184
    11  H    2.707570   3.471534   3.062053   4.573810   5.301521
    12  H    3.413410   4.117361   3.755382   4.691616   5.457041
    13  H    2.772317   2.876587   2.203062   3.556237   4.108154
    14  C    2.430153   1.528951   2.132066   2.525955   2.770993
    15  H    3.391348   2.175855   2.487552   2.756466   2.551574
    16  H    2.717272   2.172163   3.052472   2.800661   3.151996
    17  H    2.648948   2.167152   2.465020   3.477003   3.763940
    18  C    2.428683   3.803806   4.162382   4.416675   5.470103
    19  H    3.387914   4.658287   4.888894   5.117648   6.152098
    20  H    2.680966   4.122553   4.412107   5.033062   6.044443
    21  H    2.690837   4.029409   4.630782   4.440795   5.531137
    22  H    1.015304   2.039427   2.916517   2.767431   3.753310
                    6          7          8          9         10
     6  H    0.000000
     7  H    1.767973   0.000000
     8  C    2.870621   3.523762   0.000000
     9  H    2.218011   3.148316   1.102668   0.000000
    10  C    3.558182   4.606590   1.529862   2.140934   0.000000
    11  H    4.419357   5.238600   2.164870   3.055609   1.092446
    12  H    4.129682   5.351217   2.167022   2.470876   1.092361
    13  H    3.192235   4.442191   2.187391   2.498126   1.091346
    14  C    3.487410   2.785967   3.809847   4.205162   4.400403
    15  H    3.765006   3.105271   4.664971   4.928896   5.108514
    16  H    3.807237   2.614729   4.139003   4.469111   5.026202
    17  H    4.329372   3.794174   4.022077   4.656987   4.407313
    18  C    4.179141   4.527993   1.528545   2.135326   2.517008
    19  H    4.674253   5.278233   2.171318   2.465143   2.760225
    20  H    4.954759   5.177756   2.167081   3.053676   2.777892
    21  H    4.287045   4.283043   2.177324   2.486716   3.476360
    22  H    3.156625   2.650701   2.043049   2.519826   3.335439
                   11         12         13         14         15
    11  H    0.000000
    12  H    1.775152   0.000000
    13  H    1.767812   1.759744   0.000000
    14  C    4.464674   5.459296   4.184263   0.000000
    15  H    5.223586   6.151362   4.686005   1.092073   0.000000
    16  H    5.123973   6.042764   4.967024   1.094844   1.764304
    17  H    4.201742   5.497023   4.281237   1.090481   1.774776
    18  C    2.780889   2.744673   3.480167   4.834250   5.818452
    19  H    3.132055   2.536207   3.758767   5.817661   6.756097
    20  H    2.595008   3.106086   3.793411   4.918152   5.952340
    21  H    3.788346   3.749046   4.332449   4.916901   5.920546
    22  H    3.563191   4.169525   3.739089   2.617910   3.635373
                   16         17         18         19         20
    16  H    0.000000
    17  H    1.768151   0.000000
    18  C    4.928955   4.901822   0.000000
    19  H    5.961157   5.906636   1.091644   0.000000
    20  H    5.039338   4.745438   1.092475   1.773129   0.000000
    21  H    4.770542   5.100435   1.093791   1.763994   1.769867
    22  H    2.471998   2.929209   2.494647   3.529862   2.776622
                   21         22
    21  H    0.000000
    22  H    2.326843   0.000000
 Stoichiometry    C6H15N
 Framework group  C1[X(C6H15N)]
 Deg. of freedom    60
 Full point group                 C1
 Largest Abelian subgroup         C1      NOp   1
 Largest concise Abelian subgroup C1      NOp   1
                         Standard orientation:                         
 ---------------------------------------------------------------------
 Center     Atomic     Atomic              Coordinates (Angstroms)
 Number     Number      Type              X           Y           Z
 ---------------------------------------------------------------------
    1          7             0       -0.013448   -0.590334   -0.091785
    2          6             0        1.240681    0.164627   -0.208987
    3          1             0        1.087169    0.918488   -0.986427
    4          6             0        1.678047    0.886611    1.075994
    5          1             0        2.599632    1.450848    0.911764
    6          1             0        0.920680    1.589976    1.426597
    7          1             0        1.865613    0.165433    1.877712
    8          6             0       -1.246207    0.140766    0.224575
    9          1             0       -1.122902    0.788748    1.108200
   10          6             0       -1.668744    1.027709   -0.948145
   11          1             0       -1.809402    0.422494   -1.846681
   12          1             0       -2.607128    1.538056   -0.719597
   13          1             0       -0.925473    1.795549   -1.169520
   14          6             0        2.331508   -0.788598   -0.698016
   15          1             0        3.273922   -0.260177   -0.856923
   16          1             0        2.515031   -1.576825    0.039344
   17          1             0        2.033020   -1.264130   -1.632854
   18          6             0       -2.336937   -0.878170    0.554011
   19          1             0       -3.273768   -0.376688    0.804114
   20          1             0       -2.512800   -1.537947   -0.298789
   21          1             0       -2.053671   -1.497371    1.410007
   22          1             0        0.114124   -1.341788    0.578949
 ---------------------------------------------------------------------
 Rotational constants (GHZ):      4.1088981      1.4099690      1.3674752
 Standard basis: TZVP (5D, 7F)
 There are   223 symmetry adapted basis functions of A   symmetry.
 Integral buffers will be    131072 words long.
 Raffenetti 2 integral format.
 Two-electron integral symmetry is turned on.
   223 basis functions,   365 primitive gaussians,   230 cartesian basis functions
    29 alpha electrons       29 beta electrons
       nuclear repulsion energy       334.8169034436 Hartrees.
 NAtoms=   22 NActive=   22 NUniq=   22 SFac= 7.50D-01 NAtFMM=   80 NAOKFM=F Big=F
 One-electron integrals computed using PRISM.
 NBasis=   223 RedAO= T  NBF=   223
 NBsUse=   223 1.00D-06 NBFU=   223
 Initial guess read from the read-write file:
 Initial guess orbital symmetries:
       Occupied  (A) (A) (A) (A) (A) (A) (A) (A) (A) (A) (A) (A)
                 (A) (A) (A) (A) (A) (A) (A) (A) (A) (A) (A) (A)
                 (A) (A) (A) (A) (A)
       Virtual   (A) (A) (A) (A) (A) (A) (A) (A) (A) (A) (A) (A)
                 (A) (A) (A) (A) (A) (A) (A) (A) (A) (A) (A) (A)
                 (A) (A) (A) (A) (A) (A) (A) (A) (A) (A) (A) (A)
                 (A) (A) (A) (A) (A) (A) (A) (A) (A) (A) (A) (A)
                 (A) (A) (A) (A) (A) (A) (A) (A) (A) (A) (A) (A)
                 (A) (A) (A) (A) (A) (A) (A) (A) (A) (A) (A) (A)
                 (A) (A) (A) (A) (A) (A) (A) (A) (A) (A) (A) (A)
                 (A) (A) (A) (A) (A) (A) (A) (A) (A) (A) (A) (A)
                 (A) (A) (A) (A) (A) (A) (A) (A) (A) (A) (A) (A)
                 (A) (A) (A) (A) (A) (A) (A) (A) (A) (A) (A) (A)
                 (A) (A) (A) (A) (A) (A) (A) (A) (A) (A) (A) (A)
                 (A) (A) (A) (A) (A) (A) (A) (A) (A) (A) (A) (A)
                 (A) (A) (A) (A) (A) (A) (A) (A) (A) (A) (A) (A)
                 (A) (A) (A) (A) (A) (A) (A) (A) (A) (A) (A) (A)
                 (A) (A) (A) (A) (A) (A) (A) (A) (A) (A) (A) (A)
                 (A) (A) (A) (A) (A) (A) (A) (A) (A) (A) (A) (A)
                 (A) (A)
 Requested convergence on RMS density matrix=1.00D-08 within 128 cycles.
 Requested convergence on MAX density matrix=1.00D-06.
 Requested convergence on             energy=1.00D-06.
 No special actions if energy rises.
 Keep R1 integrals in memory in canonical form, NReq=   360237084.
 SCF Done:  E(RB+HF-LYP) =  -292.532678805     A.U. after    7 cycles
             Convg  =    0.6663D-08             -V/T =  2.0057
             S**2   =   0.0000
 Range of M.O.s used for correlation:     1   223
 NBasis=   223 NAE=    29 NBE=    29 NFC=     0 NFV=     0
 NROrb=    223 NOA=    29 NOB=    29 NVA=   194 NVB=   194

 **** Warning!!: The largest alpha MO coefficient is  0.15178843D+02

 Symmetrizing basis deriv contribution to polar:
 IMax=3 JMax=2 DiffMx= 0.00D+00
 G2DrvN: will do   23 centers at a time, making    1 passes doing MaxLOS=2.
 FoFDir/FoFCou used for L=0 through L=2.
 DoAtom=TTTTTTTTTTTTTTTTTTTTTT
          Differentiating once with respect to electric field.
                with respect to dipole field.
          Differentiating once with respect to nuclear coordinates.
          Store integrals in memory, NReq=   353689553.
          There are  69 degrees of freedom in the 1st order CPHF.
    66 vectors were produced by pass  0.
 AX will form  66 AO Fock derivatives at one time.
    66 vectors were produced by pass  1.
    66 vectors were produced by pass  2.
    66 vectors were produced by pass  3.
    66 vectors were produced by pass  4.
    31 vectors were produced by pass  5.
     3 vectors were produced by pass  6.
     1 vectors were produced by pass  7.
 Inv2:  IOpt= 1 Iter= 1 AM= 2.43D-15 Conv= 1.00D-12.
 Inverted reduced A of dimension  365 with in-core refinement.
 Isotropic polarizability for W=    0.000000       83.34 Bohr**3.
 End of Minotr Frequency-dependent properties file   721 does not exist.
 ***** Axes restored to original set *****
 -------------------------------------------------------------------
 Center     Atomic                   Forces (Hartrees/Bohr)
 Number     Number              X              Y              Z
 -------------------------------------------------------------------
    1          7           0.000003777   -0.000002953   -0.000002366
    2          6          -0.000003365    0.000001601   -0.000002603
    3          1          -0.000002199    0.000002595    0.000000933
    4          6          -0.000003023    0.000001432    0.000001350
    5          1          -0.000003313    0.000002546    0.000001765
    6          1          -0.000000911   -0.000000586    0.000002959
    7          1           0.000000794    0.000001835   -0.000001353
    8          6           0.000000186   -0.000002000    0.000003870
    9          1           0.000001090   -0.000003642    0.000001643
   10          6          -0.000000517   -0.000000490    0.000001738
   11          1          -0.000000125   -0.000000791    0.000001050
   12          1          -0.000000111   -0.000003780    0.000003197
   13          1          -0.000000660   -0.000000865    0.000003154
   14          6           0.000003090    0.000001789   -0.000001513
   15          1          -0.000002678    0.000005835   -0.000002024
   16          1          -0.000002301    0.000005319   -0.000002735
   17          1          -0.000002164    0.000004988   -0.000002493
   18          6           0.000002139   -0.000006243   -0.000000528
   19          1           0.000002845   -0.000004687    0.000000500
   20          1           0.000003488   -0.000001722   -0.000002326
   21          1           0.000004122   -0.000002847   -0.000002706
   22          1          -0.000000165    0.000002668   -0.000001513
 -------------------------------------------------------------------
 Cartesian Forces:  Max     0.000006243 RMS     0.000002645

 GradGradGradGradGradGradGradGradGradGradGradGradGradGradGradGradGradGrad
 Berny optimization.
 Internal  Forces:  Max     0.000002672 RMS     0.000000860
 Search for a local minimum.
 Step number   9 out of a maximum of 118
 All quantities printed in internal units (Hartrees-Bohrs-Radians)
 Second derivative matrix not updated -- analytic derivatives used.
 Trust test= 6.14D+00 RLast= 8.95D-03 DXMaxT set to 1.00D+00
     Eigenvalues ---    0.00083   0.00204   0.00273   0.00298   0.00306
     Eigenvalues ---    0.00496   0.01822   0.03985   0.04176   0.04397
     Eigenvalues ---    0.04426   0.04489   0.04526   0.04600   0.04616
     Eigenvalues ---    0.04640   0.04653   0.04769   0.05159   0.05476
     Eigenvalues ---    0.05495   0.11054   0.11879   0.11988   0.12285
     Eigenvalues ---    0.12415   0.12605   0.12947   0.12985   0.13619
     Eigenvalues ---    0.14157   0.14288   0.14774   0.14966   0.18512
     Eigenvalues ---    0.18897   0.19354   0.19988   0.24127   0.26436
     Eigenvalues ---    0.27915   0.28540   0.28965   0.29742   0.32376
     Eigenvalues ---    0.32824   0.33017   0.33029   0.33266   0.33345
     Eigenvalues ---    0.33414   0.33508   0.33617   0.34080   0.34206
     Eigenvalues ---    0.34271   0.34413   0.34523   0.36990   0.43656
     Eigenvalues --- 1000.000001000.000001000.000001000.000001000.00000
     Eigenvalues --- 1000.000001000.000001000.000001000.000001000.00000
     Eigenvalues --- 1000.000001000.000001000.000001000.000001000.00000
     Eigenvalues --- 1000.000001000.000001000.000001000.000001000.00000
     Eigenvalues --- 1000.000001000.000001000.000001000.000001000.00000
     Eigenvalues --- 1000.000001000.000001000.000001000.000001000.00000
     Eigenvalues --- 1000.000001000.000001000.000001000.000001000.00000
     Eigenvalues --- 1000.000001000.000001000.000001000.000001000.00000
     Eigenvalues --- 1000.000001000.000001000.000001000.000001000.00000
     Eigenvalues --- 1000.000001000.000001000.00000
 RFO step:  Lambda= 0.00000000D+00.
 Quintic linear search produced a step of -0.06200.
 Iteration  1 RMS(Cart)=  0.00012246 RMS(Int)=  0.00000001
 Iteration  2 RMS(Cart)=  0.00000001 RMS(Int)=  0.00000000
 Variable       Old X    -DE/DX   Delta X   Delta X   Delta X     New X
                                 (Linear)    (Quad)   (Total)
    R1        2.77510   0.00000   0.00000   0.00000   0.00000   2.77510
    R2        2.77364   0.00000   0.00000   0.00001   0.00001   2.77365
    R3        1.91865   0.00000   0.00000   0.00000   0.00000   1.91864
    R4        2.06689   0.00000   0.00000   0.00000   0.00000   2.06688
    R5        2.90534   0.00000   0.00000   0.00000   0.00000   2.90534
    R6        2.88930   0.00000   0.00000   0.00000   0.00000   2.88930
    R7        2.06547   0.00000   0.00000   0.00000   0.00000   2.06547
    R8        2.06253   0.00000   0.00000   0.00000   0.00000   2.06253
    R9        2.06839   0.00000   0.00000   0.00000   0.00000   2.06839
   R10        2.08374   0.00000   0.00000   0.00000   0.00000   2.08374
   R11        2.89102   0.00000   0.00000   0.00000   0.00000   2.89102
   R12        2.88853   0.00000   0.00000   0.00000   0.00000   2.88853
   R13        2.06442   0.00000   0.00000   0.00000   0.00000   2.06442
   R14        2.06426   0.00000   0.00000   0.00000   0.00000   2.06426
   R15        2.06234   0.00000   0.00000   0.00000   0.00000   2.06234
   R16        2.06372   0.00000   0.00000   0.00000   0.00000   2.06372
   R17        2.06895   0.00000   0.00000  -0.00001  -0.00001   2.06895
   R18        2.06071   0.00000   0.00000   0.00000   0.00000   2.06071
   R19        2.06291   0.00000   0.00000   0.00000   0.00000   2.06291
   R20        2.06448   0.00000   0.00000   0.00000   0.00000   2.06448
   R21        2.06696   0.00000   0.00000   0.00000   0.00000   2.06696
    A1        2.06964   0.00000   0.00000   0.00000   0.00001   2.06964
    A2        1.90278   0.00000   0.00000   0.00001   0.00001   1.90278
    A3        1.90901   0.00000  -0.00001  -0.00002  -0.00003   1.90898
    A4        1.86628   0.00000   0.00000   0.00000   0.00000   1.86628
    A5        2.00167   0.00000   0.00000   0.00000   0.00001   2.00168
    A6        1.89052   0.00000   0.00000  -0.00001  -0.00001   1.89051
    A7        1.88635   0.00000   0.00000   0.00000   0.00000   1.88635
    A8        1.87811   0.00000   0.00000   0.00001   0.00001   1.87812
    A9        1.93600   0.00000   0.00000  -0.00001  -0.00001   1.93599
   A10        1.93553   0.00000   0.00000   0.00000   0.00000   1.93553
   A11        1.95380   0.00000   0.00000   0.00000   0.00000   1.95380
   A12        1.93000   0.00000   0.00000   0.00000   0.00001   1.93000
   A13        1.87620   0.00000   0.00000   0.00000   0.00000   1.87620
   A14        1.88147   0.00000   0.00000  -0.00001  -0.00001   1.88146
   A15        1.88413   0.00000   0.00000   0.00000   0.00000   1.88413
   A16        1.95144   0.00000   0.00000   0.00000   0.00000   1.95144
   A17        1.93428   0.00000   0.00000   0.00000   0.00000   1.93428
   A18        1.88993   0.00000  -0.00001   0.00000  -0.00001   1.88992
   A19        1.88018   0.00000   0.00000   0.00000   0.00000   1.88018
   A20        1.87425   0.00000   0.00000   0.00000   0.00000   1.87425
   A21        1.93327   0.00000   0.00000   0.00000   0.00001   1.93328
   A22        1.92289   0.00000   0.00000   0.00001   0.00001   1.92290
   A23        1.92595   0.00000   0.00000   0.00000   0.00000   1.92595
   A24        1.95550   0.00000   0.00000  -0.00001  -0.00001   1.95550
   A25        1.89685   0.00000   0.00000   0.00000   0.00000   1.89685
   A26        1.88665   0.00000   0.00000   0.00000   0.00000   1.88665
   A27        1.87422   0.00000   0.00000   0.00000   0.00000   1.87423
   A28        1.93965   0.00000   0.00000   0.00001   0.00001   1.93966
   A29        1.93160   0.00000   0.00000  -0.00002  -0.00002   1.93158
   A30        1.92920   0.00000   0.00000  -0.00001  -0.00001   1.92919
   A31        1.87728   0.00000   0.00000   0.00001   0.00001   1.87728
   A32        1.89914   0.00000   0.00000   0.00000   0.00000   1.89914
   A33        1.88524   0.00000   0.00000   0.00001   0.00001   1.88525
   A34        1.93428   0.00000   0.00000   0.00000   0.00000   1.93428
   A35        1.92753   0.00000   0.00000  -0.00001  -0.00001   1.92751
   A36        1.94039   0.00000  -0.00001   0.00000  -0.00001   1.94038
   A37        1.89455   0.00000   0.00001   0.00000   0.00001   1.89456
   A38        1.87865   0.00000   0.00000   0.00000   0.00001   1.87865
   A39        1.88673   0.00000   0.00000   0.00001   0.00001   1.88674
    D1       -1.00929   0.00000  -0.00010   0.00009  -0.00002  -1.00931
    D2        1.08159   0.00000  -0.00010   0.00008  -0.00002   1.08158
    D3       -3.02886   0.00000  -0.00010   0.00007  -0.00003  -3.02889
    D4        3.07515   0.00000  -0.00009   0.00010   0.00001   3.07516
    D5       -1.11715   0.00000  -0.00009   0.00010   0.00001  -1.11714
    D6        1.05558   0.00000  -0.00009   0.00009   0.00000   1.05558
    D7       -0.89278   0.00000  -0.00017   0.00005  -0.00012  -0.89290
    D8        1.20518   0.00000  -0.00017   0.00005  -0.00012   1.20506
    D9       -2.95421   0.00000  -0.00017   0.00005  -0.00012  -2.95433
   D10        1.30297   0.00000  -0.00018   0.00005  -0.00013   1.30283
   D11       -2.88226   0.00000  -0.00018   0.00005  -0.00014  -2.88240
   D12       -0.75847   0.00000  -0.00018   0.00005  -0.00013  -0.75860
   D13       -3.11263   0.00000   0.00000   0.00024   0.00024  -3.11239
   D14       -1.01728   0.00000   0.00000   0.00024   0.00024  -1.01705
   D15        1.08434   0.00000   0.00000   0.00025   0.00025   1.08458
   D16       -1.03294   0.00000   0.00000   0.00024   0.00024  -1.03270
   D17        1.06240   0.00000   0.00000   0.00024   0.00024   1.06264
   D18       -3.11916   0.00000   0.00000   0.00025   0.00025  -3.11891
   D19        1.02206   0.00000   0.00000   0.00025   0.00025   1.02231
   D20        3.11740   0.00000   0.00000   0.00025   0.00025   3.11765
   D21       -1.06417   0.00000   0.00000   0.00026   0.00026  -1.06390
   D22        3.08439   0.00000  -0.00001   0.00004   0.00003   3.08441
   D23       -1.11411   0.00000  -0.00001   0.00004   0.00003  -1.11408
   D24        0.97377   0.00000  -0.00001   0.00003   0.00002   0.97380
   D25        1.07253   0.00000  -0.00001   0.00003   0.00002   1.07255
   D26       -3.12597   0.00000  -0.00001   0.00003   0.00003  -3.12594
   D27       -1.03809   0.00000  -0.00001   0.00003   0.00002  -1.03807
   D28       -0.98748   0.00000  -0.00001   0.00003   0.00002  -0.98746
   D29        1.09721   0.00000  -0.00001   0.00003   0.00003   1.09724
   D30       -3.09809   0.00000  -0.00001   0.00003   0.00002  -3.09807
   D31        1.00853   0.00000  -0.00007   0.00020   0.00012   1.00865
   D32        3.10318   0.00000  -0.00008   0.00020   0.00012   3.10331
   D33       -1.09255   0.00000  -0.00008   0.00020   0.00012  -1.09243
   D34       -3.13474   0.00000  -0.00008   0.00020   0.00012  -3.13462
   D35       -1.04009   0.00000  -0.00008   0.00020   0.00012  -1.03997
   D36        1.04736   0.00000  -0.00008   0.00020   0.00012   1.04748
   D37       -1.08963   0.00000  -0.00007   0.00020   0.00013  -1.08950
   D38        1.00502   0.00000  -0.00008   0.00021   0.00013   1.00515
   D39        3.09248   0.00000  -0.00008   0.00020   0.00013   3.09261
   D40        3.13396   0.00000  -0.00004   0.00009   0.00005   3.13401
   D41       -1.04905   0.00000  -0.00003   0.00008   0.00005  -1.04900
   D42        1.04530   0.00000  -0.00004   0.00008   0.00005   1.04535
   D43        1.02394   0.00000  -0.00004   0.00009   0.00005   1.02399
   D44        3.12411   0.00000  -0.00003   0.00008   0.00005   3.12417
   D45       -1.06472   0.00000  -0.00003   0.00008   0.00005  -1.06467
   D46       -1.02481   0.00000  -0.00004   0.00009   0.00005  -1.02476
   D47        1.07536   0.00000  -0.00003   0.00008   0.00005   1.07541
   D48       -3.11347   0.00000  -0.00004   0.00008   0.00005  -3.11342
         Item               Value     Threshold  Converged?
 Maximum Force            0.000003     0.000015     YES
 RMS     Force            0.000001     0.000010     YES
 Maximum Displacement     0.000540     0.000060     NO 
 RMS     Displacement     0.000122     0.000040     NO 
 Predicted change in Energy=-1.756436D-09
 GradGradGradGradGradGradGradGradGradGradGradGradGradGradGradGradGradGrad

                          Input orientation:                          
 ---------------------------------------------------------------------
 Center     Atomic     Atomic              Coordinates (Angstroms)
 Number     Number      Type              X           Y           Z
 ---------------------------------------------------------------------
    1          7             0       -0.086129   -0.326716   -0.041868
    2          6             0        0.596730    0.739840   -0.785313
    3          1             0       -0.138459    1.171484   -1.470488
    4          6             0        1.158006    1.873614    0.088331
    5          1             0        1.625611    2.645719   -0.527990
    6          1             0        0.378870    2.354887    0.682110
    7          1             0        1.917516    1.489199    0.776372
    8          6             0       -1.282986    0.014957    0.736011
    9          1             0       -1.105753    0.873846    1.404422
   10          6             0       -2.447426    0.376386   -0.188069
   11          1             0       -2.662353   -0.453286   -0.865482
   12          1             0       -3.344270    0.591471    0.397305
   13          1             0       -2.232323    1.259831   -0.791633
   14          6             0        1.700632    0.104911   -1.631458
   15          1             0        2.202421    0.852600   -2.249353
   16          1             0        2.459232   -0.358539   -0.992383
   17          1             0        1.288231   -0.668297   -2.280475
   18          6             0       -1.640935   -1.182465    1.616068
   19          1             0       -2.524623   -0.969458    2.220562
   20          1             0       -1.844867   -2.061292    0.999973
   21          1             0       -0.823338   -1.428886    2.299579
   22          1             0        0.585497   -0.792473    0.560483
 ---------------------------------------------------------------------
                    Distance matrix (angstroms):
                    1          2          3          4          5
     1  N    0.000000
     2  C    1.468519   0.000000
     3  H    2.070820   1.093748   0.000000
     4  C    2.531061   1.537442   2.145629   0.000000
     5  H    3.464352   2.181097   2.484676   1.093002   0.000000
     6  H    2.816267   2.192982   2.510328   1.091444   1.761615
     7  H    2.825182   2.178273   3.062084   1.094546   1.767515
     8  C    1.467754   2.524522   2.741557   3.135687   4.120503
     9  H    2.138396   2.776931   3.047844   2.802897   3.786040
    10  C    2.468086   3.123409   2.758280   3.913723   4.674938
    11  H    2.707636   3.471541   3.062017   4.573769   5.301355
    12  H    3.413418   4.117290   3.755301   4.691465   5.456723
    13  H    2.772261   2.876451   2.202934   3.556037   4.107779
    14  C    2.430147   1.528953   2.132076   2.525951   2.771097
    15  H    3.391348   2.175862   2.487577   2.756455   2.551681
    16  H    2.717232   2.172148   3.052467   2.800650   3.152167
    17  H    2.648944   2.167148   2.465018   3.476997   3.764004
    18  C    2.428679   3.803818   4.162372   4.416749   5.470128
    19  H    3.387914   4.658307   4.888892   5.117736   6.152112
    20  H    2.680923   4.122497   4.412011   5.033072   6.044406
    21  H    2.690843   4.029458   4.630809   4.440929   5.531267
    22  H    1.015302   2.039431   2.916519   2.767438   3.753369
                    6          7          8          9         10
     6  H    0.000000
     7  H    1.767974   0.000000
     8  C    2.870530   3.523951   0.000000
     9  H    2.217955   3.148533   1.102667   0.000000
    10  C    3.558037   4.606649   1.529861   2.140930   0.000000
    11  H    4.419267   5.238715   2.164876   3.055609   1.092446
    12  H    4.129470   5.351261   2.167021   2.470825   1.092361
    13  H    3.192084   4.442119   2.187384   2.498160   1.091345
    14  C    3.487412   2.785846   3.809853   4.205191   4.400393
    15  H    3.765061   3.105067   4.664987   4.928949   5.108498
    16  H    3.807166   2.614591   4.138965   4.469067   5.026164
    17  H    4.329374   3.794087   4.022086   4.657019   4.407341
    18  C    4.179085   4.528295   1.528544   2.135329   2.517013
    19  H    4.674225   5.278567   2.171319   2.465167   2.760210
    20  H    4.954662   5.177983   2.167071   3.053670   2.777911
    21  H    4.287010   4.283417   2.177316   2.486693   3.476358
    22  H    3.156480   2.650832   2.043033   2.519758   3.335444
                   11         12         13         14         15
    11  H    0.000000
    12  H    1.775151   0.000000
    13  H    1.767810   1.759746   0.000000
    14  C    4.464745   5.459273   4.184171   0.000000
    15  H    5.223645   6.151323   4.685909   1.092074   0.000000
    16  H    5.124032   6.042713   4.966902   1.094841   1.764309
    17  H    4.201850   5.497052   4.281195   1.090480   1.774779
    18  C    2.780843   2.744737   3.480169   4.834236   5.818450
    19  H    3.131944   2.536254   3.758788   5.817655   6.756107
    20  H    2.594973   3.106214   3.793393   4.918072   5.952263
    21  H    3.788323   3.749078   4.332440   4.916912   5.920573
    22  H    3.563279   4.169532   3.739022   2.617906   3.635367
                   16         17         18         19         20
    16  H    0.000000
    17  H    1.768155   0.000000
    18  C    4.928918   4.901778   0.000000
    19  H    5.961128   5.906597   1.091645   0.000000
    20  H    5.039257   4.745321   1.092473   1.773135   0.000000
    21  H    4.770527   5.100404   1.093790   1.763998   1.769869
    22  H    2.471957   2.929214   2.494665   3.529877   2.776639
                   21         22
    21  H    0.000000
    22  H    2.326864   0.000000
 Stoichiometry    C6H15N
 Framework group  C1[X(C6H15N)]
 Deg. of freedom    60
 Full point group                 C1
 Largest Abelian subgroup         C1      NOp   1
 Largest concise Abelian subgroup C1      NOp   1
                         Standard orientation:                         
 ---------------------------------------------------------------------
 Center     Atomic     Atomic              Coordinates (Angstroms)
 Number     Number      Type              X           Y           Z
 ---------------------------------------------------------------------
    1          7             0       -0.013454   -0.590361   -0.091703
    2          6             0        1.240673    0.164590   -0.209015
    3          1             0        1.087155    0.918345   -0.986556
    4          6             0        1.678056    0.886751    1.075860
    5          1             0        2.599508    1.451159    0.911472
    6          1             0        0.920596    1.589991    1.426512
    7          1             0        1.865878    0.165671    1.877607
    8          6             0       -1.246219    0.140769    0.224590
    9          1             0       -1.122941    0.788765    1.108208
   10          6             0       -1.668688    1.027703   -0.948160
   11          1             0       -1.809440    0.422468   -1.846669
   12          1             0       -2.607009    1.538166   -0.719610
   13          1             0       -0.925334    1.795446   -1.169587
   14          6             0        2.331495   -0.788714   -0.697911
   15          1             0        3.273921   -0.260331   -0.856873
   16          1             0        2.514980   -1.576840    0.039562
   17          1             0        2.033004   -1.264359   -1.632690
   18          6             0       -2.336971   -0.878152    0.553995
   19          1             0       -3.273823   -0.376659    0.804001
   20          1             0       -2.512755   -1.537966   -0.298789
   21          1             0       -2.053759   -1.497305    1.410042
   22          1             0        0.114116   -1.341717    0.579138
 ---------------------------------------------------------------------
 Rotational constants (GHZ):      4.1089067      1.4099971      1.3674563
 Standard basis: TZVP (5D, 7F)
 There are   223 symmetry adapted basis functions of A   symmetry.
 Integral buffers will be    131072 words long.
 Raffenetti 2 integral format.
 Two-electron integral symmetry is turned on.
   223 basis functions,   365 primitive gaussians,   230 cartesian basis functions
    29 alpha electrons       29 beta electrons
       nuclear repulsion energy       334.8171245847 Hartrees.
 NAtoms=   22 NActive=   22 NUniq=   22 SFac= 7.50D-01 NAtFMM=   80 NAOKFM=F Big=F
 One-electron integrals computed using PRISM.
 NBasis=   223 RedAO= T  NBF=   223
 NBsUse=   223 1.00D-06 NBFU=   223
 Initial guess read from the read-write file:
 Initial guess orbital symmetries:
       Occupied  (A) (A) (A) (A) (A) (A) (A) (A) (A) (A) (A) (A)
                 (A) (A) (A) (A) (A) (A) (A) (A) (A) (A) (A) (A)
                 (A) (A) (A) (A) (A)
       Virtual   (A) (A) (A) (A) (A) (A) (A) (A) (A) (A) (A) (A)
                 (A) (A) (A) (A) (A) (A) (A) (A) (A) (A) (A) (A)
                 (A) (A) (A) (A) (A) (A) (A) (A) (A) (A) (A) (A)
                 (A) (A) (A) (A) (A) (A) (A) (A) (A) (A) (A) (A)
                 (A) (A) (A) (A) (A) (A) (A) (A) (A) (A) (A) (A)
                 (A) (A) (A) (A) (A) (A) (A) (A) (A) (A) (A) (A)
                 (A) (A) (A) (A) (A) (A) (A) (A) (A) (A) (A) (A)
                 (A) (A) (A) (A) (A) (A) (A) (A) (A) (A) (A) (A)
                 (A) (A) (A) (A) (A) (A) (A) (A) (A) (A) (A) (A)
                 (A) (A) (A) (A) (A) (A) (A) (A) (A) (A) (A) (A)
                 (A) (A) (A) (A) (A) (A) (A) (A) (A) (A) (A) (A)
                 (A) (A) (A) (A) (A) (A) (A) (A) (A) (A) (A) (A)
                 (A) (A) (A) (A) (A) (A) (A) (A) (A) (A) (A) (A)
                 (A) (A) (A) (A) (A) (A) (A) (A) (A) (A) (A) (A)
                 (A) (A) (A) (A) (A) (A) (A) (A) (A) (A) (A) (A)
                 (A) (A) (A) (A) (A) (A) (A) (A) (A) (A) (A) (A)
                 (A) (A)
 Requested convergence on RMS density matrix=1.00D-08 within 128 cycles.
 Requested convergence on MAX density matrix=1.00D-06.
 Requested convergence on             energy=1.00D-06.
 No special actions if energy rises.
 Keep R1 integrals in memory in canonical form, NReq=   360237084.
 SCF Done:  E(RB+HF-LYP) =  -292.532678797     A.U. after    5 cycles
             Convg  =    0.4406D-08             -V/T =  2.0057
             S**2   =   0.0000
 Range of M.O.s used for correlation:     1   223
 NBasis=   223 NAE=    29 NBE=    29 NFC=     0 NFV=     0
 NROrb=    223 NOA=    29 NOB=    29 NVA=   194 NVB=   194

 **** Warning!!: The largest alpha MO coefficient is  0.15177962D+02

 Symmetrizing basis deriv contribution to polar:
 IMax=3 JMax=2 DiffMx= 0.00D+00
 G2DrvN: will do   23 centers at a time, making    1 passes doing MaxLOS=2.
 FoFDir/FoFCou used for L=0 through L=2.
 DoAtom=TTTTTTTTTTTTTTTTTTTTTT
          Differentiating once with respect to electric field.
                with respect to dipole field.
          Differentiating once with respect to nuclear coordinates.
          Store integrals in memory, NReq=   353689553.
          There are  69 degrees of freedom in the 1st order CPHF.
    66 vectors were produced by pass  0.
 AX will form  66 AO Fock derivatives at one time.
    66 vectors were produced by pass  1.
    66 vectors were produced by pass  2.
    66 vectors were produced by pass  3.
    66 vectors were produced by pass  4.
    31 vectors were produced by pass  5.
     3 vectors were produced by pass  6.
     1 vectors were produced by pass  7.
 Inv2:  IOpt= 1 Iter= 1 AM= 2.99D-15 Conv= 1.00D-12.
 Inverted reduced A of dimension  365 with in-core refinement.
 Isotropic polarizability for W=    0.000000       83.34 Bohr**3.
 End of Minotr Frequency-dependent properties file   721 does not exist.
 ***** Axes restored to original set *****
 -------------------------------------------------------------------
 Center     Atomic                   Forces (Hartrees/Bohr)
 Number     Number              X              Y              Z
 -------------------------------------------------------------------
    1          7          -0.000000048   -0.000001330   -0.000000179
    2          6          -0.000001706    0.000001777   -0.000000924
    3          1          -0.000002025    0.000001882    0.000000683
    4          6          -0.000001864    0.000001444    0.000000883
    5          1          -0.000002790    0.000002573    0.000001541
    6          1          -0.000001373   -0.000000303    0.000002313
    7          1          -0.000000417    0.000001071   -0.000000344
    8          6           0.000000886   -0.000001501    0.000000800
    9          1           0.000001204   -0.000003080    0.000001855
   10          6           0.000000067   -0.000001187    0.000001922
   11          1           0.000000329   -0.000000867    0.000000724
   12          1          -0.000000114   -0.000004218    0.000003200
   13          1          -0.000001916   -0.000000391    0.000003646
   14          6          -0.000000910    0.000004128   -0.000001717
   15          1          -0.000002677    0.000005518   -0.000001555
   16          1          -0.000000307    0.000004141   -0.000003351
   17          1          -0.000001207    0.000004649   -0.000002701
   18          6           0.000002198   -0.000003649   -0.000000983
   19          1           0.000003445   -0.000005103    0.000000563
   20          1           0.000002952   -0.000002787   -0.000001841
   21          1           0.000003900   -0.000003871   -0.000002125
   22          1           0.000002370    0.000001104   -0.000002408
 -------------------------------------------------------------------
 Cartesian Forces:  Max     0.000005518 RMS     0.000002344

 GradGradGradGradGradGradGradGradGradGradGradGradGradGradGradGradGradGrad
 Berny optimization.
 Internal  Forces:  Max     0.000001097 RMS     0.000000316
 Search for a local minimum.
 Step number  10 out of a maximum of 118
 All quantities printed in internal units (Hartrees-Bohrs-Radians)
 Second derivative matrix not updated -- analytic derivatives used.
 Trust test=-4.53D+00 RLast= 9.04D-04 DXMaxT set to 5.00D-01
     Eigenvalues ---    0.00083   0.00204   0.00273   0.00298   0.00306
     Eigenvalues ---    0.00496   0.01823   0.03985   0.04176   0.04397
     Eigenvalues ---    0.04426   0.04489   0.04526   0.04600   0.04616
     Eigenvalues ---    0.04640   0.04653   0.04769   0.05159   0.05476
     Eigenvalues ---    0.05495   0.11054   0.11879   0.11988   0.12285
     Eigenvalues ---    0.12416   0.12605   0.12947   0.12985   0.13619
     Eigenvalues ---    0.14157   0.14288   0.14774   0.14966   0.18512
     Eigenvalues ---    0.18897   0.19354   0.19988   0.24128   0.26436
     Eigenvalues ---    0.27915   0.28540   0.28965   0.29742   0.32376
     Eigenvalues ---    0.32824   0.33018   0.33029   0.33266   0.33345
     Eigenvalues ---    0.33414   0.33508   0.33617   0.34081   0.34206
     Eigenvalues ---    0.34271   0.34413   0.34523   0.36992   0.43656
     Eigenvalues --- 1000.000001000.000001000.000001000.000001000.00000
     Eigenvalues --- 1000.000001000.000001000.000001000.000001000.00000
     Eigenvalues --- 1000.000001000.000001000.000001000.000001000.00000
     Eigenvalues --- 1000.000001000.000001000.000001000.000001000.00000
     Eigenvalues --- 1000.000001000.000001000.000001000.000001000.00000
     Eigenvalues --- 1000.000001000.000001000.000001000.000001000.00000
     Eigenvalues --- 1000.000001000.000001000.000001000.000001000.00000
     Eigenvalues --- 1000.000001000.000001000.000001000.000001000.00000
     Eigenvalues --- 1000.000001000.000001000.000001000.000001000.00000
     Eigenvalues --- 1000.000001000.000001000.00000
 RFO step:  Lambda=-1.63249179D-08.
 Quintic linear search produced a step of -0.88917.
 Iteration  1 RMS(Cart)=  0.00123977 RMS(Int)=  0.00000046
 Iteration  2 RMS(Cart)=  0.00000067 RMS(Int)=  0.00000000
 Variable       Old X    -DE/DX   Delta X   Delta X   Delta X     New X
                                 (Linear)    (Quad)   (Total)
    R1        2.77510   0.00000   0.00000   0.00000   0.00000   2.77510
    R2        2.77365   0.00000  -0.00001   0.00001   0.00000   2.77365
    R3        1.91864   0.00000   0.00000   0.00000   0.00000   1.91865
    R4        2.06688   0.00000   0.00000   0.00001   0.00001   2.06689
    R5        2.90534   0.00000   0.00000   0.00000   0.00000   2.90534
    R6        2.88930   0.00000   0.00000   0.00000  -0.00001   2.88930
    R7        2.06547   0.00000   0.00000   0.00000   0.00000   2.06547
    R8        2.06253   0.00000   0.00000   0.00000   0.00000   2.06253
    R9        2.06839   0.00000   0.00000   0.00000   0.00000   2.06839
   R10        2.08374   0.00000   0.00000   0.00000   0.00000   2.08374
   R11        2.89102   0.00000   0.00000  -0.00001  -0.00001   2.89101
   R12        2.88853   0.00000   0.00000   0.00000   0.00000   2.88853
   R13        2.06442   0.00000   0.00000   0.00000   0.00000   2.06443
   R14        2.06426   0.00000   0.00000  -0.00001  -0.00001   2.06426
   R15        2.06234   0.00000   0.00000   0.00000   0.00000   2.06235
   R16        2.06372   0.00000   0.00000   0.00000  -0.00001   2.06371
   R17        2.06895   0.00000   0.00000   0.00000   0.00000   2.06895
   R18        2.06071   0.00000   0.00000   0.00000   0.00000   2.06071
   R19        2.06291   0.00000   0.00000   0.00001   0.00000   2.06291
   R20        2.06448   0.00000   0.00000  -0.00001  -0.00001   2.06447
   R21        2.06696   0.00000   0.00000   0.00000   0.00000   2.06696
    A1        2.06964   0.00000  -0.00001   0.00004   0.00004   2.06968
    A2        1.90278   0.00000  -0.00001  -0.00001  -0.00001   1.90277
    A3        1.90898   0.00000   0.00003  -0.00007  -0.00004   1.90894
    A4        1.86628   0.00000   0.00000   0.00001   0.00001   1.86629
    A5        2.00168   0.00000  -0.00001   0.00005   0.00004   2.00171
    A6        1.89051   0.00000   0.00001  -0.00005  -0.00004   1.89047
    A7        1.88635   0.00000   0.00000  -0.00001  -0.00001   1.88634
    A8        1.87812   0.00000  -0.00001  -0.00001  -0.00002   1.87810
    A9        1.93599   0.00000   0.00001   0.00001   0.00001   1.93600
   A10        1.93553   0.00000   0.00000  -0.00003  -0.00002   1.93550
   A11        1.95380   0.00000   0.00000   0.00001   0.00000   1.95381
   A12        1.93000   0.00000   0.00000   0.00002   0.00002   1.93002
   A13        1.87620   0.00000   0.00000   0.00000   0.00000   1.87620
   A14        1.88146   0.00000   0.00001   0.00001   0.00001   1.88148
   A15        1.88413   0.00000   0.00000  -0.00001  -0.00001   1.88412
   A16        1.95144   0.00000   0.00000   0.00000   0.00000   1.95144
   A17        1.93428   0.00000   0.00000   0.00001   0.00001   1.93429
   A18        1.88992   0.00000   0.00001  -0.00004  -0.00003   1.88989
   A19        1.88018   0.00000   0.00000  -0.00001  -0.00001   1.88017
   A20        1.87425   0.00000   0.00000   0.00001   0.00000   1.87426
   A21        1.93328   0.00000  -0.00001   0.00002   0.00002   1.93330
   A22        1.92290   0.00000  -0.00001   0.00001   0.00000   1.92290
   A23        1.92595   0.00000   0.00000  -0.00002  -0.00002   1.92594
   A24        1.95550   0.00000   0.00001   0.00001   0.00001   1.95551
   A25        1.89685   0.00000   0.00000  -0.00002  -0.00002   1.89683
   A26        1.88665   0.00000   0.00000   0.00001   0.00002   1.88666
   A27        1.87423   0.00000   0.00000   0.00000   0.00000   1.87423
   A28        1.93966   0.00000   0.00000  -0.00001  -0.00001   1.93964
   A29        1.93158   0.00000   0.00002   0.00000   0.00002   1.93161
   A30        1.92919   0.00000   0.00001  -0.00001   0.00000   1.92919
   A31        1.87728   0.00000  -0.00001   0.00000  -0.00001   1.87728
   A32        1.89914   0.00000   0.00000  -0.00001  -0.00001   1.89913
   A33        1.88525   0.00000  -0.00001   0.00002   0.00001   1.88526
   A34        1.93428   0.00000   0.00000   0.00000   0.00000   1.93427
   A35        1.92751   0.00000   0.00001   0.00000   0.00001   1.92752
   A36        1.94038   0.00000   0.00001  -0.00003  -0.00002   1.94036
   A37        1.89456   0.00000  -0.00001   0.00004   0.00003   1.89459
   A38        1.87865   0.00000  -0.00001   0.00000  -0.00001   1.87865
   A39        1.88674   0.00000  -0.00001  -0.00001  -0.00001   1.88673
    D1       -1.00931   0.00000   0.00002  -0.00104  -0.00102  -1.01033
    D2        1.08158   0.00000   0.00002  -0.00101  -0.00100   1.08058
    D3       -3.02889   0.00000   0.00003  -0.00101  -0.00098  -3.02987
    D4        3.07516   0.00000  -0.00001  -0.00097  -0.00098   3.07418
    D5       -1.11714   0.00000  -0.00001  -0.00095  -0.00096  -1.11810
    D6        1.05558   0.00000   0.00000  -0.00094  -0.00094   1.05464
    D7       -0.89290   0.00000   0.00011  -0.00110  -0.00100  -0.89390
    D8        1.20506   0.00000   0.00011  -0.00111  -0.00100   1.20406
    D9       -2.95433   0.00000   0.00011  -0.00109  -0.00099  -2.95532
   D10        1.30283   0.00000   0.00012  -0.00114  -0.00102   1.30181
   D11       -2.88240   0.00000   0.00012  -0.00114  -0.00102  -2.88342
   D12       -0.75860   0.00000   0.00012  -0.00113  -0.00101  -0.75961
   D13       -3.11239   0.00000  -0.00021  -0.00043  -0.00064  -3.11303
   D14       -1.01705   0.00000  -0.00021  -0.00045  -0.00066  -1.01771
   D15        1.08458   0.00000  -0.00022  -0.00043  -0.00065   1.08393
   D16       -1.03270   0.00000  -0.00021  -0.00040  -0.00061  -1.03331
   D17        1.06264   0.00000  -0.00022  -0.00041  -0.00063   1.06202
   D18       -3.11891   0.00000  -0.00022  -0.00040  -0.00062  -3.11953
   D19        1.02231   0.00000  -0.00022  -0.00041  -0.00063   1.02167
   D20        3.11765   0.00000  -0.00022  -0.00043  -0.00065   3.11700
   D21       -1.06390   0.00000  -0.00023  -0.00041  -0.00065  -1.06455
   D22        3.08441   0.00000  -0.00002  -0.00022  -0.00024   3.08417
   D23       -1.11408   0.00000  -0.00003  -0.00022  -0.00024  -1.11432
   D24        0.97380   0.00000  -0.00002  -0.00020  -0.00022   0.97358
   D25        1.07255   0.00000  -0.00002  -0.00020  -0.00022   1.07233
   D26       -3.12594   0.00000  -0.00002  -0.00020  -0.00022  -3.12616
   D27       -1.03807   0.00000  -0.00002  -0.00018  -0.00020  -1.03826
   D28       -0.98746   0.00000  -0.00002  -0.00019  -0.00021  -0.98766
   D29        1.09724   0.00000  -0.00002  -0.00019  -0.00021   1.09703
   D30       -3.09807   0.00000  -0.00002  -0.00017  -0.00019  -3.09826
   D31        1.00865   0.00000  -0.00011  -0.00052  -0.00063   1.00802
   D32        3.10331   0.00000  -0.00011  -0.00055  -0.00066   3.10265
   D33       -1.09243   0.00000  -0.00011  -0.00055  -0.00066  -1.09309
   D34       -3.13462   0.00000  -0.00011  -0.00052  -0.00062  -3.13525
   D35       -1.03997   0.00000  -0.00011  -0.00055  -0.00065  -1.04062
   D36        1.04748   0.00000  -0.00011  -0.00055  -0.00065   1.04683
   D37       -1.08950   0.00000  -0.00011  -0.00050  -0.00061  -1.09011
   D38        1.00515   0.00000  -0.00012  -0.00053  -0.00064   1.00451
   D39        3.09261   0.00000  -0.00011  -0.00053  -0.00064   3.09196
   D40        3.13401   0.00000  -0.00004  -0.00035  -0.00039   3.13362
   D41       -1.04900   0.00000  -0.00005  -0.00030  -0.00035  -1.04935
   D42        1.04535   0.00000  -0.00004  -0.00033  -0.00037   1.04498
   D43        1.02399   0.00000  -0.00005  -0.00033  -0.00038   1.02362
   D44        3.12417   0.00000  -0.00005  -0.00029  -0.00034   3.12383
   D45       -1.06467   0.00000  -0.00004  -0.00031  -0.00036  -1.06503
   D46       -1.02476   0.00000  -0.00004  -0.00034  -0.00038  -1.02514
   D47        1.07541   0.00000  -0.00005  -0.00029  -0.00034   1.07507
   D48       -3.11342   0.00000  -0.00004  -0.00032  -0.00036  -3.11379
         Item               Value     Threshold  Converged?
 Maximum Force            0.000001     0.000015     YES
 RMS     Force            0.000000     0.000010     YES
 Maximum Displacement     0.003654     0.000060     NO 
 RMS     Displacement     0.001240     0.000040     NO 
 Predicted change in Energy=-3.604344D-09
 GradGradGradGradGradGradGradGradGradGradGradGradGradGradGradGradGradGrad

                          Input orientation:                          
 ---------------------------------------------------------------------
 Center     Atomic     Atomic              Coordinates (Angstroms)
 Number     Number      Type              X           Y           Z
 ---------------------------------------------------------------------
    1          7             0       -0.086032   -0.326989   -0.041838
    2          6             0        0.596600    0.739459   -0.785649
    3          1             0       -0.138519    1.170323   -1.471396
    4          6             0        1.156989    1.874057    0.087490
    5          1             0        1.625018    2.645672   -0.529123
    6          1             0        0.377288    2.355761    0.680176
    7          1             0        1.915953    1.490349    0.776528
    8          6             0       -1.282636    0.014750    0.736400
    9          1             0       -1.104899    0.873079    1.405397
   10          6             0       -2.446991    0.377422   -0.187292
   11          1             0       -2.662002   -0.451421   -0.865696
   12          1             0       -3.343825    0.591898    0.398315
   13          1             0       -2.231777    1.261570   -0.789788
   14          6             0        1.701121    0.104515   -1.630971
   15          1             0        2.202640    0.852020   -2.249302
   16          1             0        2.459820   -0.357992   -0.991327
   17          1             0        1.289359   -0.669432   -2.279515
   18          6             0       -1.641065   -1.183123    1.615650
   19          1             0       -2.524351   -0.969971    2.220683
   20          1             0       -1.845839   -2.061326    0.998950
   21          1             0       -0.823355   -1.430642    2.298629
   22          1             0        0.585785   -0.792646    0.560382
 ---------------------------------------------------------------------
                    Distance matrix (angstroms):
                    1          2          3          4          5
     1  N    0.000000
     2  C    1.468520   0.000000
     3  H    2.070830   1.093752   0.000000
     4  C    2.531093   1.537439   2.145625   0.000000
     5  H    3.464369   2.181077   2.484873   1.093002   0.000000
     6  H    2.816579   2.192983   2.510096   1.091444   1.761614
     7  H    2.824957   2.178285   3.062096   1.094546   1.767524
     8  C    1.467754   2.524552   2.742029   3.135264   4.120407
     9  H    2.138397   2.777343   3.049293   2.802673   3.786410
    10  C    2.468092   3.122907   2.758018   3.912045   4.673656
    11  H    2.707368   3.470315   3.060211   4.571772   5.299415
    12  H    3.413400   4.117098   3.755581   4.690189   5.455963
    13  H    2.772574   2.876166   2.203326   3.553659   4.105916
    14  C    2.430114   1.528951   2.132061   2.525958   2.770801
    15  H    3.391309   2.175849   2.487465   2.756545   2.551441
    16  H    2.717325   2.172163   3.052471   2.800581   3.151591
    17  H    2.648805   2.167147   2.465074   3.477006   3.763835
    18  C    2.428654   3.803906   4.162477   4.417096   5.470560
    19  H    3.387894   4.658381   4.889224   5.117741   6.152363
    20  H    2.681060   4.122462   4.411474   5.033385   6.044640
    21  H    2.690628   4.029687   4.631103   4.442064   5.532364
    22  H    1.015305   2.039427   2.916503   2.767889   3.753540
                    6          7          8          9         10
     6  H    0.000000
     7  H    1.767968   0.000000
     8  C    2.870339   3.522779   0.000000
     9  H    2.218371   3.146751   1.102668   0.000000
    10  C    3.555682   4.604653   1.529856   2.140921   0.000000
    11  H    4.416704   5.236892   2.164873   3.055607   1.092448
    12  H    4.127632   5.349348   2.167003   2.471046   1.092358
    13  H    3.188302   4.439521   2.187391   2.497922   1.091346
    14  C    3.487412   2.786169   3.809896   4.205231   4.400627
    15  H    3.764969   3.105688   4.665039   4.929207   5.108444
    16  H    3.807272   2.614855   4.138835   4.468450   5.026341
    17  H    4.329369   3.794294   4.022314   4.657294   4.408358
    18  C    4.180020   4.528129   1.528545   2.135334   2.517025
    19  H    4.674737   5.277789   2.171319   2.465029   2.760398
    20  H    4.955256   5.178314   2.167076   3.053674   2.777777
    21  H    4.289263   4.284015   2.177304   2.486818   3.476362
    22  H    3.157577   2.651062   2.043004   2.519346   3.335537
                   11         12         13         14         15
    11  H    0.000000
    12  H    1.775140   0.000000
    13  H    1.767821   1.759744   0.000000
    14  C    4.464476   5.459581   4.184979   0.000000
    15  H    5.222841   6.151489   4.686360   1.092071   0.000000
    16  H    5.124214   6.042822   4.967362   1.094843   1.764304
    17  H    4.202341   5.498011   4.283277   1.090482   1.774770
    18  C    2.781147   2.744448   3.480172   4.834125   5.818396
    19  H    3.132663   2.536138   3.758764   5.817591   6.756098
    20  H    2.595153   3.105531   3.793437   4.918157   5.952218
    21  H    3.788462   3.748950   4.332433   4.916446   5.920377
    22  H    3.563460   4.169540   3.739173   2.617422   3.635034
                   16         17         18         19         20
    16  H    0.000000
    17  H    1.768163   0.000000
    18  C    4.928938   4.901385   0.000000
    19  H    5.960998   5.906479   1.091647   0.000000
    20  H    5.039965   4.745015   1.092470   1.773152   0.000000
    21  H    4.770076   5.099255   1.093789   1.763996   1.769859
    22  H    2.471585   2.928347   2.494980   3.530013   2.777531
                   21         22
    21  H    0.000000
    22  H    2.326847   0.000000
 Stoichiometry    C6H15N
 Framework group  C1[X(C6H15N)]
 Deg. of freedom    60
 Full point group                 C1
 Largest Abelian subgroup         C1      NOp   1
 Largest concise Abelian subgroup C1      NOp   1
                         Standard orientation:                         
 ---------------------------------------------------------------------
 Center     Atomic     Atomic              Coordinates (Angstroms)
 Number     Number      Type              X           Y           Z
 ---------------------------------------------------------------------
    1          7             0       -0.013467   -0.590708   -0.091066
    2          6             0        1.240642    0.164111   -0.209437
    3          1             0        1.087334    0.916332   -0.988510
    4          6             0        1.677599    0.888824    1.074143
    5          1             0        2.599414    1.452437    0.909067
    6          1             0        0.920270    1.593183    1.422827
    7          1             0        1.864596    0.169395    1.877565
    8          6             0       -1.246199    0.140722    0.224656
    9          1             0       -1.123086    0.788916    1.108152
   10          6             0       -1.668153    1.027443   -0.948435
   11          1             0       -1.808115    0.422102   -1.846998
   12          1             0       -2.606797    1.537600   -0.720547
   13          1             0       -0.924908    1.795423   -1.169409
   14          6             0        2.331652   -0.790092   -0.696145
   15          1             0        3.274033   -0.261925   -0.856068
   16          1             0        2.515130   -1.576649    0.043007
   17          1             0        2.033375   -1.267728   -1.629979
   18          6             0       -2.337206   -0.877954    0.553980
   19          1             0       -3.273953   -0.376245    0.803952
   20          1             0       -2.513080   -1.537734   -0.298809
   21          1             0       -2.054174   -1.497173    1.410038
   22          1             0        0.114226   -1.341308    0.580602
 ---------------------------------------------------------------------
 Rotational constants (GHZ):      4.1090843      1.4104225      1.3672540
 Standard basis: TZVP (5D, 7F)
 There are   223 symmetry adapted basis functions of A   symmetry.
 Integral buffers will be    131072 words long.
 Raffenetti 2 integral format.
 Two-electron integral symmetry is turned on.
   223 basis functions,   365 primitive gaussians,   230 cartesian basis functions
    29 alpha electrons       29 beta electrons
       nuclear repulsion energy       334.8227071348 Hartrees.
 NAtoms=   22 NActive=   22 NUniq=   22 SFac= 7.50D-01 NAtFMM=   80 NAOKFM=F Big=F
 One-electron integrals computed using PRISM.
 NBasis=   223 RedAO= T  NBF=   223
 NBsUse=   223 1.00D-06 NBFU=   223
 Initial guess read from the read-write file:
 Initial guess orbital symmetries:
       Occupied  (A) (A) (A) (A) (A) (A) (A) (A) (A) (A) (A) (A)
                 (A) (A) (A) (A) (A) (A) (A) (A) (A) (A) (A) (A)
                 (A) (A) (A) (A) (A)
       Virtual   (A) (A) (A) (A) (A) (A) (A) (A) (A) (A) (A) (A)
                 (A) (A) (A) (A) (A) (A) (A) (A) (A) (A) (A) (A)
                 (A) (A) (A) (A) (A) (A) (A) (A) (A) (A) (A) (A)
                 (A) (A) (A) (A) (A) (A) (A) (A) (A) (A) (A) (A)
                 (A) (A) (A) (A) (A) (A) (A) (A) (A) (A) (A) (A)
                 (A) (A) (A) (A) (A) (A) (A) (A) (A) (A) (A) (A)
                 (A) (A) (A) (A) (A) (A) (A) (A) (A) (A) (A) (A)
                 (A) (A) (A) (A) (A) (A) (A) (A) (A) (A) (A) (A)
                 (A) (A) (A) (A) (A) (A) (A) (A) (A) (A) (A) (A)
                 (A) (A) (A) (A) (A) (A) (A) (A) (A) (A) (A) (A)
                 (A) (A) (A) (A) (A) (A) (A) (A) (A) (A) (A) (A)
                 (A) (A) (A) (A) (A) (A) (A) (A) (A) (A) (A) (A)
                 (A) (A) (A) (A) (A) (A) (A) (A) (A) (A) (A) (A)
                 (A) (A) (A) (A) (A) (A) (A) (A) (A) (A) (A) (A)
                 (A) (A) (A) (A) (A) (A) (A) (A) (A) (A) (A) (A)
                 (A) (A) (A) (A) (A) (A) (A) (A) (A) (A) (A) (A)
                 (A) (A)
 Requested convergence on RMS density matrix=1.00D-08 within 128 cycles.
 Requested convergence on MAX density matrix=1.00D-06.
 Requested convergence on             energy=1.00D-06.
 No special actions if energy rises.
 Keep R1 integrals in memory in canonical form, NReq=   360237084.
 SCF Done:  E(RB+HF-LYP) =  -292.532678677     A.U. after    7 cycles
             Convg  =    0.3143D-08             -V/T =  2.0057
             S**2   =   0.0000
 Range of M.O.s used for correlation:     1   223
 NBasis=   223 NAE=    29 NBE=    29 NFC=     0 NFV=     0
 NROrb=    223 NOA=    29 NOB=    29 NVA=   194 NVB=   194

 **** Warning!!: The largest alpha MO coefficient is  0.15177894D+02

 Symmetrizing basis deriv contribution to polar:
 IMax=3 JMax=2 DiffMx= 0.00D+00
 G2DrvN: will do   23 centers at a time, making    1 passes doing MaxLOS=2.
 FoFDir/FoFCou used for L=0 through L=2.
 DoAtom=TTTTTTTTTTTTTTTTTTTTTT
          Differentiating once with respect to electric field.
                with respect to dipole field.
          Differentiating once with respect to nuclear coordinates.
          Store integrals in memory, NReq=   353689553.
          There are  69 degrees of freedom in the 1st order CPHF.
    66 vectors were produced by pass  0.
 AX will form  66 AO Fock derivatives at one time.
    66 vectors were produced by pass  1.
    66 vectors were produced by pass  2.
    66 vectors were produced by pass  3.
    66 vectors were produced by pass  4.
    31 vectors were produced by pass  5.
     3 vectors were produced by pass  6.
     1 vectors were produced by pass  7.
 Inv2:  IOpt= 1 Iter= 1 AM= 2.52D-15 Conv= 1.00D-12.
 Inverted reduced A of dimension  365 with in-core refinement.
 Isotropic polarizability for W=    0.000000       83.34 Bohr**3.
 End of Minotr Frequency-dependent properties file   721 does not exist.
 ***** Axes restored to original set *****
 -------------------------------------------------------------------
 Center     Atomic                   Forces (Hartrees/Bohr)
 Number     Number              X              Y              Z
 -------------------------------------------------------------------
    1          7          -0.000001702    0.000002027   -0.000000375
    2          6          -0.000000590    0.000002070    0.000000945
    3          1          -0.000001364    0.000002155    0.000000386
    4          6          -0.000000770    0.000001208    0.000000715
    5          1          -0.000003524    0.000003157    0.000001487
    6          1          -0.000001303   -0.000001155    0.000003023
    7          1          -0.000000016    0.000000712   -0.000000714
    8          6           0.000001175   -0.000001695   -0.000001378
    9          1           0.000000607   -0.000002881    0.000002311
   10          6          -0.000000143   -0.000001967    0.000002531
   11          1          -0.000000576   -0.000001309    0.000001657
   12          1           0.000000336   -0.000002659    0.000003392
   13          1          -0.000001811   -0.000001025    0.000002790
   14          6          -0.000003293    0.000004758   -0.000001683
   15          1          -0.000002511    0.000005432   -0.000001136
   16          1           0.000000542    0.000003192   -0.000003789
   17          1          -0.000000809    0.000004674   -0.000003092
   18          6           0.000003195   -0.000002697   -0.000001447
   19          1           0.000003266   -0.000005671    0.000000008
   20          1           0.000003208   -0.000003507   -0.000001696
   21          1           0.000003454   -0.000004122   -0.000001394
   22          1           0.000002628   -0.000000699   -0.000002541
 -------------------------------------------------------------------
 Cartesian Forces:  Max     0.000005671 RMS     0.000002427

 GradGradGradGradGradGradGradGradGradGradGradGradGradGradGradGradGradGrad
 Berny optimization.
 Internal  Forces:  Max     0.000001163 RMS     0.000000423
 Search for a local minimum.
 Step number  11 out of a maximum of 118
 All quantities printed in internal units (Hartrees-Bohrs-Radians)
 Second derivative matrix not updated -- analytic derivatives used.
 Trust test=-3.56D+01 RLast= 4.31D-03 DXMaxT set to 2.50D-01
     Eigenvalues ---    0.00084   0.00204   0.00273   0.00297   0.00306
     Eigenvalues ---    0.00496   0.01822   0.03986   0.04176   0.04397
     Eigenvalues ---    0.04425   0.04489   0.04526   0.04601   0.04616
     Eigenvalues ---    0.04639   0.04653   0.04769   0.05159   0.05476
     Eigenvalues ---    0.05495   0.11054   0.11879   0.11988   0.12286
     Eigenvalues ---    0.12416   0.12604   0.12948   0.12985   0.13620
     Eigenvalues ---    0.14156   0.14288   0.14775   0.14966   0.18512
     Eigenvalues ---    0.18897   0.19355   0.19989   0.24128   0.26436
     Eigenvalues ---    0.27916   0.28541   0.28964   0.29741   0.32375
     Eigenvalues ---    0.32824   0.33018   0.33029   0.33266   0.33345
     Eigenvalues ---    0.33414   0.33508   0.33617   0.34080   0.34206
     Eigenvalues ---    0.34271   0.34413   0.34523   0.36992   0.43655
     Eigenvalues --- 1000.000001000.000001000.000001000.000001000.00000
     Eigenvalues --- 1000.000001000.000001000.000001000.000001000.00000
     Eigenvalues --- 1000.000001000.000001000.000001000.000001000.00000
     Eigenvalues --- 1000.000001000.000001000.000001000.000001000.00000
     Eigenvalues --- 1000.000001000.000001000.000001000.000001000.00000
     Eigenvalues --- 1000.000001000.000001000.000001000.000001000.00000
     Eigenvalues --- 1000.000001000.000001000.000001000.000001000.00000
     Eigenvalues --- 1000.000001000.000001000.000001000.000001000.00000
     Eigenvalues --- 1000.000001000.000001000.000001000.000001000.00000
     Eigenvalues --- 1000.000001000.000001000.00000
 RFO step:  Lambda= 0.00000000D+00.
 Quintic linear search produced a step of -0.93902.
 Iteration  1 RMS(Cart)=  0.00120272 RMS(Int)=  0.00000045
 Iteration  2 RMS(Cart)=  0.00000063 RMS(Int)=  0.00000000
 Variable       Old X    -DE/DX   Delta X   Delta X   Delta X     New X
                                 (Linear)    (Quad)   (Total)
    R1        2.77510   0.00000   0.00000   0.00000   0.00000   2.77510
    R2        2.77365   0.00000  -0.00001   0.00001   0.00000   2.77365
    R3        1.91865   0.00000   0.00000   0.00000   0.00000   1.91864
    R4        2.06689   0.00000  -0.00001   0.00000  -0.00001   2.06688
    R5        2.90534   0.00000   0.00000   0.00000   0.00000   2.90534
    R6        2.88930   0.00000   0.00000   0.00000   0.00001   2.88930
    R7        2.06547   0.00000   0.00000   0.00000   0.00000   2.06547
    R8        2.06253   0.00000   0.00000   0.00000   0.00000   2.06253
    R9        2.06839   0.00000   0.00000   0.00000   0.00000   2.06839
   R10        2.08374   0.00000   0.00000   0.00000   0.00000   2.08374
   R11        2.89101   0.00000   0.00001   0.00000   0.00001   2.89102
   R12        2.88853   0.00000   0.00000   0.00000   0.00000   2.88853
   R13        2.06443   0.00000   0.00000   0.00000   0.00000   2.06442
   R14        2.06426   0.00000   0.00001   0.00000   0.00000   2.06426
   R15        2.06235   0.00000   0.00000   0.00000   0.00000   2.06234
   R16        2.06371   0.00000   0.00000   0.00000   0.00001   2.06372
   R17        2.06895   0.00000   0.00000  -0.00001  -0.00001   2.06895
   R18        2.06071   0.00000   0.00000   0.00000   0.00000   2.06071
   R19        2.06291   0.00000  -0.00001   0.00000   0.00000   2.06291
   R20        2.06447   0.00000   0.00001   0.00000   0.00001   2.06447
   R21        2.06696   0.00000   0.00000   0.00000   0.00000   2.06696
    A1        2.06968   0.00000  -0.00004   0.00001  -0.00004   2.06964
    A2        1.90277   0.00000   0.00000   0.00000   0.00001   1.90278
    A3        1.90894   0.00000   0.00007  -0.00003   0.00004   1.90898
    A4        1.86629   0.00000  -0.00001   0.00000  -0.00001   1.86628
    A5        2.00171   0.00000  -0.00004   0.00000  -0.00004   2.00168
    A6        1.89047   0.00000   0.00004  -0.00001   0.00004   1.89051
    A7        1.88634   0.00000   0.00001   0.00000   0.00001   1.88635
    A8        1.87810   0.00000   0.00001   0.00001   0.00002   1.87812
    A9        1.93600   0.00000  -0.00001  -0.00001  -0.00001   1.93599
   A10        1.93550   0.00000   0.00003   0.00000   0.00003   1.93553
   A11        1.95381   0.00000  -0.00001   0.00000  -0.00001   1.95380
   A12        1.93002   0.00000  -0.00002   0.00000  -0.00002   1.93000
   A13        1.87620   0.00000   0.00000   0.00000   0.00000   1.87620
   A14        1.88148   0.00000   0.00000  -0.00001  -0.00002   1.88146
   A15        1.88412   0.00000   0.00001   0.00000   0.00001   1.88413
   A16        1.95144   0.00000   0.00000   0.00000   0.00000   1.95144
   A17        1.93429   0.00000  -0.00001   0.00001  -0.00001   1.93428
   A18        1.88989   0.00000   0.00004  -0.00001   0.00002   1.88991
   A19        1.88017   0.00000   0.00001   0.00000   0.00001   1.88018
   A20        1.87426   0.00000  -0.00001   0.00000   0.00000   1.87425
   A21        1.93330   0.00000  -0.00002   0.00001  -0.00002   1.93328
   A22        1.92290   0.00000  -0.00001   0.00001   0.00000   1.92290
   A23        1.92594   0.00000   0.00002   0.00000   0.00001   1.92595
   A24        1.95551   0.00000  -0.00001   0.00000  -0.00001   1.95550
   A25        1.89683   0.00000   0.00002   0.00000   0.00001   1.89685
   A26        1.88666   0.00000  -0.00001   0.00000  -0.00001   1.88665
   A27        1.87423   0.00000   0.00000   0.00000   0.00000   1.87423
   A28        1.93964   0.00000   0.00001   0.00001   0.00001   1.93966
   A29        1.93161   0.00000   0.00000  -0.00002  -0.00002   1.93158
   A30        1.92919   0.00000   0.00001  -0.00001   0.00000   1.92919
   A31        1.87728   0.00000   0.00000   0.00001   0.00001   1.87729
   A32        1.89913   0.00000   0.00001   0.00000   0.00001   1.89914
   A33        1.88526   0.00000  -0.00002   0.00001  -0.00001   1.88525
   A34        1.93427   0.00000   0.00000   0.00000   0.00000   1.93428
   A35        1.92752   0.00000   0.00000  -0.00001  -0.00001   1.92751
   A36        1.94036   0.00000   0.00003  -0.00001   0.00002   1.94038
   A37        1.89459   0.00000  -0.00004   0.00001  -0.00003   1.89456
   A38        1.87865   0.00000   0.00000   0.00001   0.00000   1.87865
   A39        1.88673   0.00000   0.00000   0.00001   0.00001   1.88674
    D1       -1.01033   0.00000   0.00097   0.00006   0.00103  -1.00930
    D2        1.08058   0.00000   0.00095   0.00006   0.00101   1.08159
    D3       -3.02987   0.00000   0.00095   0.00005   0.00099  -3.02888
    D4        3.07418   0.00000   0.00091   0.00009   0.00100   3.07518
    D5       -1.11810   0.00000   0.00089   0.00009   0.00098  -1.11712
    D6        1.05464   0.00000   0.00088   0.00008   0.00096   1.05560
    D7       -0.89390   0.00000   0.00105  -0.00015   0.00090  -0.89299
    D8        1.20406   0.00000   0.00105  -0.00015   0.00090   1.20496
    D9       -2.95532   0.00000   0.00104  -0.00014   0.00089  -2.95442
   D10        1.30181   0.00000   0.00108  -0.00016   0.00092   1.30273
   D11       -2.88342   0.00000   0.00108  -0.00017   0.00092  -2.88250
   D12       -0.75961   0.00000   0.00107  -0.00016   0.00091  -0.75870
   D13       -3.11303   0.00000   0.00038   0.00038   0.00076  -3.11227
   D14       -1.01771   0.00000   0.00039   0.00039   0.00078  -1.01692
   D15        1.08393   0.00000   0.00038   0.00040   0.00078   1.08471
   D16       -1.03331   0.00000   0.00035   0.00039   0.00074  -1.03257
   D17        1.06202   0.00000   0.00036   0.00039   0.00075   1.06277
   D18       -3.11953   0.00000   0.00035   0.00040   0.00075  -3.11878
   D19        1.02167   0.00000   0.00036   0.00040   0.00076   1.02243
   D20        3.11700   0.00000   0.00037   0.00040   0.00077   3.11777
   D21       -1.06455   0.00000   0.00036   0.00041   0.00077  -1.06378
   D22        3.08417   0.00000   0.00020   0.00008   0.00028   3.08446
   D23       -1.11432   0.00000   0.00020   0.00008   0.00029  -1.11403
   D24        0.97358   0.00000   0.00018   0.00008   0.00026   0.97384
   D25        1.07233   0.00000   0.00018   0.00008   0.00026   1.07260
   D26       -3.12616   0.00000   0.00018   0.00008   0.00026  -3.12590
   D27       -1.03826   0.00000   0.00017   0.00007   0.00024  -1.03802
   D28       -0.98766   0.00000   0.00017   0.00008   0.00025  -0.98741
   D29        1.09703   0.00000   0.00017   0.00008   0.00025   1.09728
   D30       -3.09826   0.00000   0.00015   0.00007   0.00023  -3.09803
   D31        1.00802   0.00000   0.00048   0.00009   0.00057   1.00859
   D32        3.10265   0.00000   0.00050   0.00009   0.00059   3.10324
   D33       -1.09309   0.00000   0.00050   0.00009   0.00059  -1.09250
   D34       -3.13525   0.00000   0.00047   0.00009   0.00056  -3.13468
   D35       -1.04062   0.00000   0.00050   0.00009   0.00059  -1.04003
   D36        1.04683   0.00000   0.00050   0.00009   0.00059   1.04742
   D37       -1.09011   0.00000   0.00046   0.00010   0.00055  -1.08956
   D38        1.00451   0.00000   0.00048   0.00010   0.00058   1.00509
   D39        3.09196   0.00000   0.00048   0.00010   0.00058   3.09254
   D40        3.13362   0.00000   0.00032   0.00005   0.00037   3.13399
   D41       -1.04935   0.00000   0.00028   0.00005   0.00033  -1.04902
   D42        1.04498   0.00000   0.00030   0.00005   0.00035   1.04533
   D43        1.02362   0.00000   0.00031   0.00005   0.00036   1.02398
   D44        3.12383   0.00000   0.00026   0.00006   0.00032   3.12415
   D45       -1.06503   0.00000   0.00029   0.00005   0.00034  -1.06469
   D46       -1.02514   0.00000   0.00031   0.00005   0.00036  -1.02478
   D47        1.07507   0.00000   0.00027   0.00006   0.00033   1.07540
   D48       -3.11379   0.00000   0.00029   0.00005   0.00034  -3.11344
         Item               Value     Threshold  Converged?
 Maximum Force            0.000001     0.000015     YES
 RMS     Force            0.000000     0.000010     YES
 Maximum Displacement     0.003709     0.000060     NO 
 RMS     Displacement     0.001203     0.000040     NO 
 Predicted change in Energy=-1.334557D-09
 GradGradGradGradGradGradGradGradGradGradGradGradGradGradGradGradGradGrad

                          Input orientation:                          
 ---------------------------------------------------------------------
 Center     Atomic     Atomic              Coordinates (Angstroms)
 Number     Number      Type              X           Y           Z
 ---------------------------------------------------------------------
    1          7             0       -0.086105   -0.326722   -0.041821
    2          6             0        0.596726    0.739820   -0.785313
    3          1             0       -0.138476    1.171420   -1.470501
    4          6             0        1.157983    1.873641    0.088282
    5          1             0        1.625457    2.645793   -0.528079
    6          1             0        0.378859    2.354837    0.682139
    7          1             0        1.917595    1.489292    0.776248
    8          6             0       -1.282975    0.014949    0.736039
    9          1             0       -1.105743    0.873813    1.404484
   10          6             0       -2.447388    0.376430   -0.188054
   11          1             0       -2.662275   -0.453192   -0.865542
   12          1             0       -3.344257    0.591446    0.397307
   13          1             0       -2.232286    1.259930   -0.791537
   14          6             0        1.700637    0.104880   -1.631439
   15          1             0        2.202436    0.852562   -2.249335
   16          1             0        2.459226   -0.358565   -0.992349
   17          1             0        1.288243   -0.668333   -2.280453
   18          6             0       -1.640964   -1.182497    1.616048
   19          1             0       -2.524650   -0.969489    2.220544
   20          1             0       -1.844912   -2.061294    0.999918
   21          1             0       -0.823378   -1.428964    2.299556
   22          1             0        0.585532   -0.792426    0.560560
 ---------------------------------------------------------------------
                    Distance matrix (angstroms):
                    1          2          3          4          5
     1  N    0.000000
     2  C    1.468520   0.000000
     3  H    2.070821   1.093747   0.000000
     4  C    2.531062   1.537441   2.145629   0.000000
     5  H    3.464352   2.181098   2.484632   1.093002   0.000000
     6  H    2.816215   2.192980   2.510373   1.091444   1.761616
     7  H    2.825236   2.178273   3.062083   1.094546   1.767515
     8  C    1.467754   2.524525   2.741555   3.135697   4.120475
     9  H    2.138397   2.776970   3.047903   2.802943   3.786048
    10  C    2.468089   3.123364   2.758216   3.913656   4.674794
    11  H    2.707612   3.471426   3.061846   4.573652   5.301154
    12  H    3.413417   4.117275   3.755277   4.691448   5.456623
    13  H    2.772297   2.876432   2.202922   3.555931   4.107579
    14  C    2.430147   1.528953   2.132075   2.525951   2.771154
    15  H    3.391349   2.175862   2.487593   2.756435   2.551725
    16  H    2.717210   2.172147   3.052465   2.800668   3.152283
    17  H    2.648963   2.167149   2.465003   3.476996   3.764035
    18  C    2.428676   3.803826   4.162353   4.416802   5.470155
    19  H    3.387912   4.658315   4.888878   5.117783   6.152120
    20  H    2.680926   4.122485   4.411954   5.033107   6.044411
    21  H    2.690829   4.029484   4.630812   4.441027   5.531362
    22  H    1.015303   2.039430   2.916520   2.767427   3.753389
                    6          7          8          9         10
     6  H    0.000000
     7  H    1.767974   0.000000
     8  C    2.870483   3.524053   0.000000
     9  H    2.217940   3.148661   1.102668   0.000000
    10  C    3.557950   4.606671   1.529861   2.140929   0.000000
    11  H    4.419145   5.238695   2.164875   3.055610   1.092446
    12  H    4.129440   5.351337   2.167019   2.470846   1.092361
    13  H    3.191962   4.442079   2.187386   2.498138   1.091345
    14  C    3.487412   2.785789   3.809853   4.205217   4.400365
    15  H    3.765076   3.104949   4.664991   4.928984   5.108468
    16  H    3.807150   2.614550   4.138950   4.469068   5.026129
    17  H    4.329375   3.794055   4.022097   4.657053   4.407335
    18  C    4.179067   4.528472   1.528545   2.135330   2.517013
    19  H    4.674206   5.278744   2.171320   2.465160   2.760219
    20  H    4.954630   5.178142   2.167070   3.053670   2.777905
    21  H    4.287023   4.283646   2.177315   2.486699   3.476358
    22  H    3.156384   2.650877   2.043029   2.519716   3.335454
                   11         12         13         14         15
    11  H    0.000000
    12  H    1.775149   0.000000
    13  H    1.767811   1.759745   0.000000
    14  C    4.464644   5.459259   4.184191   0.000000
    15  H    5.223532   6.151316   4.685923   1.092074   0.000000
    16  H    5.123945   6.042688   4.966905   1.094841   1.764309
    17  H    4.201767   5.497044   4.281260   1.090480   1.774779
    18  C    2.780872   2.744706   3.480169   4.834233   5.818451
    19  H    3.132000   2.536230   3.758779   5.817653   6.756110
    20  H    2.594998   3.106156   3.793403   4.918055   5.952245
    21  H    3.788340   3.749058   4.332440   4.916915   5.920585
    22  H    3.563299   4.169532   3.739042   2.617914   3.635364
                   16         17         18         19         20
    16  H    0.000000
    17  H    1.768155   0.000000
    18  C    4.928910   4.901769   0.000000
    19  H    5.961118   5.906591   1.091645   0.000000
    20  H    5.039248   4.745296   1.092473   1.773136   0.000000
    21  H    4.770523   5.100391   1.093790   1.763998   1.769868
    22  H    2.471940   2.929258   2.494694   3.529892   2.776711
                   21         22
    21  H    0.000000
    22  H    2.326869   0.000000
 Stoichiometry    C6H15N
 Framework group  C1[X(C6H15N)]
 Deg. of freedom    60
 Full point group                 C1
 Largest Abelian subgroup         C1      NOp   1
 Largest concise Abelian subgroup C1      NOp   1
                         Standard orientation:                         
 ---------------------------------------------------------------------
 Center     Atomic     Atomic              Coordinates (Angstroms)
 Number     Number      Type              X           Y           Z
 ---------------------------------------------------------------------
    1          7             0       -0.013459   -0.590381   -0.091632
    2          6             0        1.240666    0.164562   -0.209027
    3          1             0        1.087137    0.918250   -0.986630
    4          6             0        1.678067    0.886833    1.075781
    5          1             0        2.599448    1.451329    0.911299
    6          1             0        0.920557    1.590010    1.426452
    7          1             0        1.866022    0.165812    1.877550
    8          6             0       -1.246225    0.140775    0.224600
    9          1             0       -1.122973    0.788783    1.108213
   10          6             0       -1.668639    1.027695   -0.948179
   11          1             0       -1.809304    0.422457   -1.846700
   12          1             0       -2.606996    1.538121   -0.719696
   13          1             0       -0.925298    1.795467   -1.169550
   14          6             0        2.331481   -0.788783   -0.697856
   15          1             0        3.273917   -0.260422   -0.856836
   16          1             0        2.514945   -1.576871    0.039663
   17          1             0        2.032996   -1.264477   -1.632613
   18          6             0       -2.337002   -0.878128    0.553980
   19          1             0       -3.273852   -0.376620    0.803961
   20          1             0       -2.512772   -1.537944   -0.298806
   21          1             0       -2.053821   -1.497282    1.410037
   22          1             0        0.114118   -1.341667    0.579287
 ---------------------------------------------------------------------
 Rotational constants (GHZ):      4.1089156      1.4100133      1.3674476
 Standard basis: TZVP (5D, 7F)
 There are   223 symmetry adapted basis functions of A   symmetry.
 Integral buffers will be    131072 words long.
 Raffenetti 2 integral format.
 Two-electron integral symmetry is turned on.
   223 basis functions,   365 primitive gaussians,   230 cartesian basis functions
    29 alpha electrons       29 beta electrons
       nuclear repulsion energy       334.8173201149 Hartrees.
 NAtoms=   22 NActive=   22 NUniq=   22 SFac= 7.50D-01 NAtFMM=   80 NAOKFM=F Big=F
 One-electron integrals computed using PRISM.
 NBasis=   223 RedAO= T  NBF=   223
 NBsUse=   223 1.00D-06 NBFU=   223
 Initial guess read from the read-write file:
 Initial guess orbital symmetries:
       Occupied  (A) (A) (A) (A) (A) (A) (A) (A) (A) (A) (A) (A)
                 (A) (A) (A) (A) (A) (A) (A) (A) (A) (A) (A) (A)
                 (A) (A) (A) (A) (A)
       Virtual   (A) (A) (A) (A) (A) (A) (A) (A) (A) (A) (A) (A)
                 (A) (A) (A) (A) (A) (A) (A) (A) (A) (A) (A) (A)
                 (A) (A) (A) (A) (A) (A) (A) (A) (A) (A) (A) (A)
                 (A) (A) (A) (A) (A) (A) (A) (A) (A) (A) (A) (A)
                 (A) (A) (A) (A) (A) (A) (A) (A) (A) (A) (A) (A)
                 (A) (A) (A) (A) (A) (A) (A) (A) (A) (A) (A) (A)
                 (A) (A) (A) (A) (A) (A) (A) (A) (A) (A) (A) (A)
                 (A) (A) (A) (A) (A) (A) (A) (A) (A) (A) (A) (A)
                 (A) (A) (A) (A) (A) (A) (A) (A) (A) (A) (A) (A)
                 (A) (A) (A) (A) (A) (A) (A) (A) (A) (A) (A) (A)
                 (A) (A) (A) (A) (A) (A) (A) (A) (A) (A) (A) (A)
                 (A) (A) (A) (A) (A) (A) (A) (A) (A) (A) (A) (A)
                 (A) (A) (A) (A) (A) (A) (A) (A) (A) (A) (A) (A)
                 (A) (A) (A) (A) (A) (A) (A) (A) (A) (A) (A) (A)
                 (A) (A) (A) (A) (A) (A) (A) (A) (A) (A) (A) (A)
                 (A) (A) (A) (A) (A) (A) (A) (A) (A) (A) (A) (A)
                 (A) (A)
 Requested convergence on RMS density matrix=1.00D-08 within 128 cycles.
 Requested convergence on MAX density matrix=1.00D-06.
 Requested convergence on             energy=1.00D-06.
 No special actions if energy rises.
 Keep R1 integrals in memory in canonical form, NReq=   360237084.
 SCF Done:  E(RB+HF-LYP) =  -292.532678792     A.U. after    7 cycles
             Convg  =    0.3000D-08             -V/T =  2.0057
             S**2   =   0.0000
 Range of M.O.s used for correlation:     1   223
 NBasis=   223 NAE=    29 NBE=    29 NFC=     0 NFV=     0
 NROrb=    223 NOA=    29 NOB=    29 NVA=   194 NVB=   194

 **** Warning!!: The largest alpha MO coefficient is  0.15177647D+02

 Symmetrizing basis deriv contribution to polar:
 IMax=3 JMax=2 DiffMx= 0.00D+00
 G2DrvN: will do   23 centers at a time, making    1 passes doing MaxLOS=2.
 FoFDir/FoFCou used for L=0 through L=2.
 DoAtom=TTTTTTTTTTTTTTTTTTTTTT
          Differentiating once with respect to electric field.
                with respect to dipole field.
          Differentiating once with respect to nuclear coordinates.
          Store integrals in memory, NReq=   353689553.
          There are  69 degrees of freedom in the 1st order CPHF.
    66 vectors were produced by pass  0.
 AX will form  66 AO Fock derivatives at one time.
    66 vectors were produced by pass  1.
    66 vectors were produced by pass  2.
    66 vectors were produced by pass  3.
    66 vectors were produced by pass  4.
    31 vectors were produced by pass  5.
     3 vectors were produced by pass  6.
     1 vectors were produced by pass  7.
 Inv2:  IOpt= 1 Iter= 1 AM= 3.17D-15 Conv= 1.00D-12.
 Inverted reduced A of dimension  365 with in-core refinement.
 Isotropic polarizability for W=    0.000000       83.34 Bohr**3.
 End of Minotr Frequency-dependent properties file   721 does not exist.
 ***** Axes restored to original set *****
 -------------------------------------------------------------------
 Center     Atomic                   Forces (Hartrees/Bohr)
 Number     Number              X              Y              Z
 -------------------------------------------------------------------
    1          7          -0.000000179   -0.000000675   -0.000000263
    2          6          -0.000001385    0.000001810   -0.000000588
    3          1          -0.000002205    0.000001836    0.000000887
    4          6          -0.000001808    0.000001396    0.000000953
    5          1          -0.000002408    0.000002375    0.000001559
    6          1          -0.000001454   -0.000000023    0.000001969
    7          1          -0.000000753    0.000000951   -0.000000023
    8          6           0.000001179   -0.000001568    0.000000798
    9          1           0.000000984   -0.000002938    0.000001782
   10          6           0.000000019   -0.000001450    0.000001946
   11          1           0.000000244   -0.000000910    0.000000823
   12          1          -0.000000076   -0.000004043    0.000003220
   13          1          -0.000001914   -0.000000455    0.000003558
   14          6          -0.000001152    0.000004449   -0.000001897
   15          1          -0.000002752    0.000005487   -0.000001623
   16          1          -0.000000145    0.000004179   -0.000003399
   17          1          -0.000001141    0.000004559   -0.000002635
   18          6           0.000002395   -0.000003498   -0.000000960
   19          1           0.000003466   -0.000005136    0.000000570
   20          1           0.000002894   -0.000002847   -0.000001822
   21          1           0.000003880   -0.000003943   -0.000002095
   22          1           0.000002311    0.000000446   -0.000002759
 -------------------------------------------------------------------
 Cartesian Forces:  Max     0.000005487 RMS     0.000002333

 GradGradGradGradGradGradGradGradGradGradGradGradGradGradGradGradGradGrad
 Berny optimization.
 Internal  Forces:  Max     0.000000751 RMS     0.000000272
 Search for a local minimum.
 Step number  12 out of a maximum of 118
 All quantities printed in internal units (Hartrees-Bohrs-Radians)
 Second derivative matrix not updated -- analytic derivatives used.
 Trust test=-9.96D+00 RLast= 1.28D-03 DXMaxT set to 1.25D-01
     Eigenvalues ---    0.00083   0.00204   0.00273   0.00298   0.00306
     Eigenvalues ---    0.00496   0.01823   0.03985   0.04176   0.04397
     Eigenvalues ---    0.04426   0.04489   0.04526   0.04600   0.04616
     Eigenvalues ---    0.04640   0.04653   0.04769   0.05159   0.05476
     Eigenvalues ---    0.05495   0.11054   0.11879   0.11988   0.12285
     Eigenvalues ---    0.12416   0.12605   0.12947   0.12985   0.13619
     Eigenvalues ---    0.14157   0.14288   0.14774   0.14966   0.18512
     Eigenvalues ---    0.18897   0.19354   0.19988   0.24128   0.26436
     Eigenvalues ---    0.27915   0.28540   0.28965   0.29742   0.32376
     Eigenvalues ---    0.32824   0.33018   0.33029   0.33266   0.33345
     Eigenvalues ---    0.33414   0.33508   0.33617   0.34081   0.34206
     Eigenvalues ---    0.34271   0.34413   0.34523   0.36992   0.43656
     Eigenvalues --- 1000.000001000.000001000.000001000.000001000.00000
     Eigenvalues --- 1000.000001000.000001000.000001000.000001000.00000
     Eigenvalues --- 1000.000001000.000001000.000001000.000001000.00000
     Eigenvalues --- 1000.000001000.000001000.000001000.000001000.00000
     Eigenvalues --- 1000.000001000.000001000.000001000.000001000.00000
     Eigenvalues --- 1000.000001000.000001000.000001000.000001000.00000
     Eigenvalues --- 1000.000001000.000001000.000001000.000001000.00000
     Eigenvalues --- 1000.000001000.000001000.000001000.000001000.00000
     Eigenvalues --- 1000.000001000.000001000.000001000.000001000.00000
     Eigenvalues --- 1000.000001000.000001000.00000
 RFO step:  Lambda=-1.35518644D-08.
 Quintic linear search produced a step of -0.89272.
 Iteration  1 RMS(Cart)=  0.00110932 RMS(Int)=  0.00000039
 Iteration  2 RMS(Cart)=  0.00000054 RMS(Int)=  0.00000000
 Variable       Old X    -DE/DX   Delta X   Delta X   Delta X     New X
                                 (Linear)    (Quad)   (Total)
    R1        2.77510   0.00000   0.00000   0.00000   0.00000   2.77510
    R2        2.77365   0.00000  -0.00001   0.00001   0.00000   2.77365
    R3        1.91864   0.00000   0.00000   0.00000   0.00000   1.91865
    R4        2.06688   0.00000   0.00000   0.00001   0.00001   2.06689
    R5        2.90534   0.00000   0.00000   0.00000   0.00000   2.90534
    R6        2.88930   0.00000   0.00000   0.00000   0.00000   2.88930
    R7        2.06547   0.00000   0.00000   0.00000   0.00000   2.06547
    R8        2.06253   0.00000   0.00000   0.00000   0.00000   2.06253
    R9        2.06839   0.00000   0.00000   0.00000   0.00000   2.06839
   R10        2.08374   0.00000   0.00000   0.00000   0.00000   2.08374
   R11        2.89102   0.00000   0.00000  -0.00001  -0.00001   2.89101
   R12        2.88853   0.00000   0.00000   0.00000   0.00000   2.88853
   R13        2.06442   0.00000   0.00000   0.00000   0.00000   2.06443
   R14        2.06426   0.00000   0.00000   0.00000   0.00000   2.06426
   R15        2.06234   0.00000   0.00000   0.00000   0.00000   2.06234
   R16        2.06372   0.00000   0.00000   0.00000  -0.00001   2.06371
   R17        2.06895   0.00000   0.00001   0.00000   0.00001   2.06895
   R18        2.06071   0.00000   0.00000   0.00000   0.00000   2.06071
   R19        2.06291   0.00000   0.00000   0.00000   0.00000   2.06291
   R20        2.06447   0.00000   0.00000  -0.00001   0.00000   2.06447
   R21        2.06696   0.00000   0.00000   0.00000   0.00000   2.06696
    A1        2.06964   0.00000  -0.00001   0.00004   0.00003   2.06968
    A2        1.90278   0.00000   0.00000   0.00000  -0.00001   1.90277
    A3        1.90898   0.00000   0.00003  -0.00006  -0.00003   1.90895
    A4        1.86628   0.00000   0.00000   0.00001   0.00001   1.86629
    A5        2.00168   0.00000  -0.00001   0.00004   0.00004   2.00171
    A6        1.89051   0.00000   0.00001  -0.00004  -0.00003   1.89048
    A7        1.88635   0.00000   0.00000  -0.00001  -0.00001   1.88634
    A8        1.87812   0.00000  -0.00001  -0.00001  -0.00002   1.87810
    A9        1.93599   0.00000   0.00001   0.00001   0.00001   1.93600
   A10        1.93553   0.00000   0.00000  -0.00003  -0.00003   1.93550
   A11        1.95380   0.00000   0.00000   0.00001   0.00001   1.95381
   A12        1.93000   0.00000  -0.00001   0.00002   0.00002   1.93002
   A13        1.87620   0.00000   0.00000   0.00000   0.00000   1.87620
   A14        1.88146   0.00000   0.00001   0.00000   0.00001   1.88148
   A15        1.88413   0.00000   0.00000  -0.00001  -0.00001   1.88412
   A16        1.95144   0.00000   0.00000   0.00000   0.00000   1.95144
   A17        1.93428   0.00000  -0.00001   0.00001   0.00001   1.93429
   A18        1.88991   0.00000   0.00001  -0.00003  -0.00002   1.88989
   A19        1.88018   0.00000   0.00000  -0.00001   0.00000   1.88017
   A20        1.87425   0.00000   0.00000   0.00001   0.00000   1.87426
   A21        1.93328   0.00000  -0.00001   0.00002   0.00002   1.93330
   A22        1.92290   0.00000  -0.00001   0.00001   0.00000   1.92290
   A23        1.92595   0.00000   0.00000  -0.00001  -0.00001   1.92594
   A24        1.95550   0.00000   0.00000   0.00000   0.00001   1.95551
   A25        1.89685   0.00000   0.00000  -0.00001  -0.00001   1.89683
   A26        1.88665   0.00000   0.00000   0.00001   0.00001   1.88666
   A27        1.87423   0.00000   0.00000   0.00001   0.00000   1.87423
   A28        1.93966   0.00000   0.00000  -0.00001  -0.00001   1.93965
   A29        1.93158   0.00000   0.00002   0.00000   0.00002   1.93160
   A30        1.92919   0.00000   0.00001  -0.00001   0.00000   1.92919
   A31        1.87729   0.00000  -0.00001   0.00000  -0.00001   1.87728
   A32        1.89914   0.00000   0.00000  -0.00001  -0.00001   1.89913
   A33        1.88525   0.00000  -0.00001   0.00002   0.00001   1.88526
   A34        1.93428   0.00000   0.00000   0.00000   0.00000   1.93427
   A35        1.92751   0.00000   0.00001   0.00000   0.00001   1.92752
   A36        1.94038   0.00000   0.00001  -0.00002  -0.00001   1.94037
   A37        1.89456   0.00000  -0.00001   0.00003   0.00002   1.89459
   A38        1.87865   0.00000  -0.00001   0.00000   0.00000   1.87865
   A39        1.88674   0.00000  -0.00001   0.00000  -0.00001   1.88673
    D1       -1.00930   0.00000   0.00001  -0.00100  -0.00099  -1.01029
    D2        1.08159   0.00000   0.00000  -0.00097  -0.00097   1.08062
    D3       -3.02888   0.00000   0.00001  -0.00097  -0.00096  -3.02983
    D4        3.07518   0.00000  -0.00003  -0.00094  -0.00097   3.07421
    D5       -1.11712   0.00000  -0.00003  -0.00092  -0.00095  -1.11806
    D6        1.05560   0.00000  -0.00002  -0.00091  -0.00093   1.05467
    D7       -0.89299   0.00000   0.00019  -0.00097  -0.00078  -0.89378
    D8        1.20496   0.00000   0.00019  -0.00098  -0.00078   1.20418
    D9       -2.95442   0.00000   0.00019  -0.00096  -0.00077  -2.95520
   D10        1.30273   0.00000   0.00021  -0.00100  -0.00080   1.30194
   D11       -2.88250   0.00000   0.00021  -0.00101  -0.00080  -2.88329
   D12       -0.75870   0.00000   0.00021  -0.00099  -0.00079  -0.75949
   D13       -3.11227   0.00000  -0.00032  -0.00049  -0.00081  -3.11307
   D14       -1.01692   0.00000  -0.00032  -0.00050  -0.00082  -1.01775
   D15        1.08471   0.00000  -0.00033  -0.00049  -0.00082   1.08389
   D16       -1.03257   0.00000  -0.00033  -0.00045  -0.00078  -1.03335
   D17        1.06277   0.00000  -0.00033  -0.00047  -0.00080   1.06197
   D18       -3.11878   0.00000  -0.00034  -0.00045  -0.00079  -3.11958
   D19        1.02243   0.00000  -0.00033  -0.00047  -0.00080   1.02163
   D20        3.11777   0.00000  -0.00034  -0.00048  -0.00082   3.11696
   D21       -1.06378   0.00000  -0.00034  -0.00047  -0.00081  -1.06459
   D22        3.08446   0.00000  -0.00006  -0.00025  -0.00032   3.08414
   D23       -1.11403   0.00000  -0.00006  -0.00025  -0.00032  -1.11435
   D24        0.97384   0.00000  -0.00006  -0.00024  -0.00029   0.97355
   D25        1.07260   0.00000  -0.00006  -0.00024  -0.00030   1.07230
   D26       -3.12590   0.00000  -0.00006  -0.00024  -0.00030  -3.12620
   D27       -1.03802   0.00000  -0.00006  -0.00022  -0.00028  -1.03830
   D28       -0.98741   0.00000  -0.00006  -0.00022  -0.00029  -0.98770
   D29        1.09728   0.00000  -0.00006  -0.00022  -0.00029   1.09700
   D30       -3.09803   0.00000  -0.00006  -0.00021  -0.00026  -3.09829
   D31        1.00859   0.00000  -0.00005  -0.00037  -0.00043   1.00816
   D32        3.10324   0.00000  -0.00005  -0.00040  -0.00045   3.10279
   D33       -1.09250   0.00000  -0.00005  -0.00040  -0.00045  -1.09294
   D34       -3.13468   0.00000  -0.00005  -0.00037  -0.00042  -3.13511
   D35       -1.04003   0.00000  -0.00005  -0.00039  -0.00044  -1.04048
   D36        1.04742   0.00000  -0.00005  -0.00039  -0.00044   1.04697
   D37       -1.08956   0.00000  -0.00006  -0.00036  -0.00041  -1.08997
   D38        1.00509   0.00000  -0.00006  -0.00038  -0.00043   1.00466
   D39        3.09254   0.00000  -0.00006  -0.00038  -0.00043   3.09211
   D40        3.13399   0.00000  -0.00003  -0.00027  -0.00030   3.13369
   D41       -1.04902   0.00000  -0.00003  -0.00024  -0.00027  -1.04929
   D42        1.04533   0.00000  -0.00002  -0.00026  -0.00028   1.04505
   D43        1.02398   0.00000  -0.00003  -0.00026  -0.00029   1.02369
   D44        3.12415   0.00000  -0.00004  -0.00022  -0.00026   3.12389
   D45       -1.06469   0.00000  -0.00003  -0.00024  -0.00027  -1.06496
   D46       -1.02478   0.00000  -0.00003  -0.00027  -0.00029  -1.02507
   D47        1.07540   0.00000  -0.00003  -0.00023  -0.00026   1.07513
   D48       -3.11344   0.00000  -0.00003  -0.00025  -0.00028  -3.11372
         Item               Value     Threshold  Converged?
 Maximum Force            0.000001     0.000015     YES
 RMS     Force            0.000000     0.000010     YES
 Maximum Displacement     0.003535     0.000060     NO 
 RMS     Displacement     0.001109     0.000040     NO 
 Predicted change in Energy=-2.654212D-09
 GradGradGradGradGradGradGradGradGradGradGradGradGradGradGradGradGradGrad

                          Input orientation:                          
 ---------------------------------------------------------------------
 Center     Atomic     Atomic              Coordinates (Angstroms)
 Number     Number      Type              X           Y           Z
 ---------------------------------------------------------------------
    1          7             0       -0.086056   -0.326970   -0.041877
    2          6             0        0.596610    0.739495   -0.785632
    3          1             0       -0.138501    1.170434   -1.471340
    4          6             0        1.157060    1.874014    0.087571
    5          1             0        1.625150    2.645628   -0.528997
    6          1             0        0.377382    2.355742    0.680268
    7          1             0        1.915987    1.490222    0.776602
    8          6             0       -1.282662    0.014764    0.736359
    9          1             0       -1.104949    0.873137    1.405306
   10          6             0       -2.447042    0.377340   -0.187339
   11          1             0       -2.662122   -0.451602   -0.865600
   12          1             0       -3.343841    0.591958    0.398271
   13          1             0       -2.231810    1.261377   -0.789991
   14          6             0        1.701093    0.104560   -1.631010
   15          1             0        2.202611    0.852077   -2.249327
   16          1             0        2.459800   -0.357989   -0.991406
   17          1             0        1.289295   -0.669353   -2.279572
   18          6             0       -1.641037   -1.183072    1.615680
   19          1             0       -2.524366   -0.969944    2.220660
   20          1             0       -1.845722   -2.061333    0.999033
   21          1             0       -0.823338   -1.430482    2.298711
   22          1             0        0.585744   -0.792672    0.560329
 ---------------------------------------------------------------------
                    Distance matrix (angstroms):
                    1          2          3          4          5
     1  N    0.000000
     2  C    1.468520   0.000000
     3  H    2.070830   1.093752   0.000000
     4  C    2.531091   1.537440   2.145625   0.000000
     5  H    3.464368   2.181077   2.484889   1.093002   0.000000
     6  H    2.816596   2.192984   2.510081   1.091444   1.761613
     7  H    2.824937   2.178284   3.062096   1.094546   1.767523
     8  C    1.467754   2.524550   2.742009   3.135280   4.120430
     9  H    2.138397   2.777296   3.049180   2.802653   3.786383
    10  C    2.468090   3.122968   2.758082   3.912181   4.673822
    11  H    2.707429   3.470511   3.060488   4.572000   5.299702
    12  H    3.413403   4.117104   3.755567   4.690236   5.456029
    13  H    2.772504   2.876167   2.203281   3.553854   4.106142
    14  C    2.430116   1.528951   2.132062   2.525958   2.770781
    15  H    3.391310   2.175849   2.487453   2.756560   2.551435
    16  H    2.717343   2.172163   3.052472   2.800565   3.151536
    17  H    2.648791   2.167146   2.465087   3.477005   3.763829
    18  C    2.428657   3.803897   4.162488   4.417040   5.470518
    19  H    3.387897   4.658375   4.889216   5.117720   6.152354
    20  H    2.681032   4.122456   4.411537   5.033330   6.044609
    21  H    2.690665   4.029668   4.631096   4.441938   5.532242
    22  H    1.015305   2.039427   2.916504   2.767872   3.753518
                    6          7          8          9         10
     6  H    0.000000
     7  H    1.767968   0.000000
     8  C    2.870378   3.522776   0.000000
     9  H    2.218356   3.146763   1.102668   0.000000
    10  C    3.555867   4.604749   1.529857   2.140922   0.000000
    11  H    4.416953   5.237041   2.164874   3.055607   1.092448
    12  H    4.127706   5.349374   2.167005   2.470995   1.092359
    13  H    3.188601   4.439685   2.187389   2.497974   1.091346
    14  C    3.487412   2.786186   3.809895   4.205211   4.400639
    15  H    3.764970   3.105741   4.665035   4.929173   5.108468
    16  H    3.807269   2.614855   4.138858   4.468483   5.026364
    17  H    4.329369   3.794299   4.022290   4.657253   4.408313
    18  C    4.179979   4.528021   1.528545   2.135333   2.517024
    19  H    4.674734   5.277732   2.171319   2.465054   2.760365
    20  H    4.955235   5.178172   2.167074   3.053672   2.777803
    21  H    4.289124   4.283833   2.177306   2.486793   3.476361
    22  H    3.157580   2.651023   2.043007   2.519395   3.335525
                   11         12         13         14         15
    11  H    0.000000
    12  H    1.775142   0.000000
    13  H    1.767819   1.759745   0.000000
    14  C    4.464618   5.459569   4.184885   0.000000
    15  H    5.223018   6.151469   4.686286   1.092071   0.000000
    16  H    5.124323   6.042835   4.967305   1.094843   1.764305
    17  H    4.202432   5.497972   4.283077   1.090482   1.774771
    18  C    2.781081   2.744514   3.480172   4.834132   5.818398
    19  H    3.132516   2.536174   3.758777   5.817596   6.756098
    20  H    2.595110   3.105676   3.793424   4.918141   5.952209
    21  H    3.788430   3.748982   4.332433   4.916484   5.920397
    22  H    3.563458   4.169543   3.739129   2.617441   3.635055
                   16         17         18         19         20
    16  H    0.000000
    17  H    1.768164   0.000000
    18  C    4.928948   4.901402   0.000000
    19  H    5.961021   5.906475   1.091647   0.000000
    20  H    5.039915   4.745017   1.092470   1.773150   0.000000
    21  H    4.770127   5.099335   1.093790   1.763996   1.769860
    22  H    2.471623   2.928349   2.494941   3.530001   2.777406
                   21         22
    21  H    0.000000
    22  H    2.326862   0.000000
 Stoichiometry    C6H15N
 Framework group  C1[X(C6H15N)]
 Deg. of freedom    60
 Full point group                 C1
 Largest Abelian subgroup         C1      NOp   1
 Largest concise Abelian subgroup C1      NOp   1
                         Standard orientation:                         
 ---------------------------------------------------------------------
 Center     Atomic     Atomic              Coordinates (Angstroms)
 Number     Number      Type              X           Y           Z
 ---------------------------------------------------------------------
    1          7             0       -0.013462   -0.590675   -0.091150
    2          6             0        1.240650    0.164156   -0.209409
    3          1             0        1.087341    0.916502   -0.988361
    4          6             0        1.677616    0.888663    1.074285
    5          1             0        2.599456    1.452263    0.909306
    6          1             0        0.920311    1.593002    1.423062
    7          1             0        1.864572    0.169107    1.877602
    8          6             0       -1.246196    0.140722    0.224646
    9          1             0       -1.123057    0.788897    1.108151
   10          6             0       -1.668219    1.027460   -0.948407
   11          1             0       -1.808347    0.422118   -1.846944
   12          1             0       -2.606788    1.537708   -0.720410
   13          1             0       -0.924931    1.795367   -1.169487
   14          6             0        2.331654   -0.789974   -0.696273
   15          1             0        3.274027   -0.261779   -0.856150
   16          1             0        2.515156   -1.576629    0.042769
   17          1             0        2.033355   -1.267486   -1.630163
   18          6             0       -2.337170   -0.877981    0.553994
   19          1             0       -3.273935   -0.376297    0.803950
   20          1             0       -2.513022   -1.537785   -0.298782
   21          1             0       -2.054121   -1.497171    1.410067
   22          1             0        0.114220   -1.341361    0.580423
 ---------------------------------------------------------------------
 Rotational constants (GHZ):      4.1090690      1.4103887      1.3672696
 Standard basis: TZVP (5D, 7F)
 There are   223 symmetry adapted basis functions of A   symmetry.
 Integral buffers will be    131072 words long.
 Raffenetti 2 integral format.
 Two-electron integral symmetry is turned on.
   223 basis functions,   365 primitive gaussians,   230 cartesian basis functions
    29 alpha electrons       29 beta electrons
       nuclear repulsion energy       334.8222512721 Hartrees.
 NAtoms=   22 NActive=   22 NUniq=   22 SFac= 7.50D-01 NAtFMM=   80 NAOKFM=F Big=F
 One-electron integrals computed using PRISM.
 NBasis=   223 RedAO= T  NBF=   223
 NBsUse=   223 1.00D-06 NBFU=   223
 Initial guess read from the read-write file:
 Initial guess orbital symmetries:
       Occupied  (A) (A) (A) (A) (A) (A) (A) (A) (A) (A) (A) (A)
                 (A) (A) (A) (A) (A) (A) (A) (A) (A) (A) (A) (A)
                 (A) (A) (A) (A) (A)
       Virtual   (A) (A) (A) (A) (A) (A) (A) (A) (A) (A) (A) (A)
                 (A) (A) (A) (A) (A) (A) (A) (A) (A) (A) (A) (A)
                 (A) (A) (A) (A) (A) (A) (A) (A) (A) (A) (A) (A)
                 (A) (A) (A) (A) (A) (A) (A) (A) (A) (A) (A) (A)
                 (A) (A) (A) (A) (A) (A) (A) (A) (A) (A) (A) (A)
                 (A) (A) (A) (A) (A) (A) (A) (A) (A) (A) (A) (A)
                 (A) (A) (A) (A) (A) (A) (A) (A) (A) (A) (A) (A)
                 (A) (A) (A) (A) (A) (A) (A) (A) (A) (A) (A) (A)
                 (A) (A) (A) (A) (A) (A) (A) (A) (A) (A) (A) (A)
                 (A) (A) (A) (A) (A) (A) (A) (A) (A) (A) (A) (A)
                 (A) (A) (A) (A) (A) (A) (A) (A) (A) (A) (A) (A)
                 (A) (A) (A) (A) (A) (A) (A) (A) (A) (A) (A) (A)
                 (A) (A) (A) (A) (A) (A) (A) (A) (A) (A) (A) (A)
                 (A) (A) (A) (A) (A) (A) (A) (A) (A) (A) (A) (A)
                 (A) (A) (A) (A) (A) (A) (A) (A) (A) (A) (A) (A)
                 (A) (A) (A) (A) (A) (A) (A) (A) (A) (A) (A) (A)
                 (A) (A)
 Requested convergence on RMS density matrix=1.00D-08 within 128 cycles.
 Requested convergence on MAX density matrix=1.00D-06.
 Requested convergence on             energy=1.00D-06.
 No special actions if energy rises.
 Keep R1 integrals in memory in canonical form, NReq=   360237084.
 SCF Done:  E(RB+HF-LYP) =  -292.532678688     A.U. after    7 cycles
             Convg  =    0.2785D-08             -V/T =  2.0057
             S**2   =   0.0000
 Range of M.O.s used for correlation:     1   223
 NBasis=   223 NAE=    29 NBE=    29 NFC=     0 NFV=     0
 NROrb=    223 NOA=    29 NOB=    29 NVA=   194 NVB=   194

 **** Warning!!: The largest alpha MO coefficient is  0.15178018D+02

 Symmetrizing basis deriv contribution to polar:
 IMax=3 JMax=2 DiffMx= 0.00D+00
 G2DrvN: will do   23 centers at a time, making    1 passes doing MaxLOS=2.
 FoFDir/FoFCou used for L=0 through L=2.
 DoAtom=TTTTTTTTTTTTTTTTTTTTTT
          Differentiating once with respect to electric field.
                with respect to dipole field.
          Differentiating once with respect to nuclear coordinates.
          Store integrals in memory, NReq=   353689553.
          There are  69 degrees of freedom in the 1st order CPHF.
    66 vectors were produced by pass  0.
 AX will form  66 AO Fock derivatives at one time.
    66 vectors were produced by pass  1.
    66 vectors were produced by pass  2.
    66 vectors were produced by pass  3.
    66 vectors were produced by pass  4.
    31 vectors were produced by pass  5.
     3 vectors were produced by pass  6.
     1 vectors were produced by pass  7.
 Inv2:  IOpt= 1 Iter= 1 AM= 3.22D-15 Conv= 1.00D-12.
 Inverted reduced A of dimension  365 with in-core refinement.
 Isotropic polarizability for W=    0.000000       83.34 Bohr**3.
 End of Minotr Frequency-dependent properties file   721 does not exist.
 ***** Axes restored to original set *****
 -------------------------------------------------------------------
 Center     Atomic                   Forces (Hartrees/Bohr)
 Number     Number              X              Y              Z
 -------------------------------------------------------------------
    1          7          -0.000001584    0.000001439   -0.000000137
    2          6          -0.000000785    0.000002050    0.000000738
    3          1          -0.000001307    0.000002094    0.000000273
    4          6          -0.000000812    0.000001289    0.000000631
    5          1          -0.000003727    0.000003256    0.000001470
    6          1          -0.000001270   -0.000001283    0.000003181
    7          1           0.000000141    0.000000789   -0.000000871
    8          6           0.000001041   -0.000001662   -0.000001357
    9          1           0.000000788   -0.000002826    0.000002158
   10          6          -0.000000069   -0.000001882    0.000002422
   11          1          -0.000000305   -0.000001173    0.000001387
   12          1           0.000000221   -0.000003093    0.000003358
   13          1          -0.000001952   -0.000000793    0.000003088
   14          6          -0.000003141    0.000004577   -0.000001593
   15          1          -0.000002414    0.000005464   -0.000001044
   16          1           0.000000406    0.000003129   -0.000003755
   17          1          -0.000000851    0.000004774   -0.000003172
   18          6           0.000002989   -0.000002643   -0.000001323
   19          1           0.000003339   -0.000005593    0.000000121
   20          1           0.000003108   -0.000003439   -0.000001700
   21          1           0.000003521   -0.000004161   -0.000001499
   22          1           0.000002662   -0.000000311   -0.000002374
 -------------------------------------------------------------------
 Cartesian Forces:  Max     0.000005593 RMS     0.000002412

 GradGradGradGradGradGradGradGradGradGradGradGradGradGradGradGradGradGrad
 Berny optimization.
 Internal  Forces:  Max     0.000001074 RMS     0.000000395
 Search for a local minimum.
 Step number  13 out of a maximum of 118
 All quantities printed in internal units (Hartrees-Bohrs-Radians)
 Second derivative matrix not updated -- analytic derivatives used.
 Trust test=-4.43D+01 RLast= 3.94D-03 DXMaxT set to 6.25D-02
     Eigenvalues ---    0.00084   0.00204   0.00273   0.00297   0.00306
     Eigenvalues ---    0.00496   0.01822   0.03985   0.04176   0.04397
     Eigenvalues ---    0.04425   0.04489   0.04526   0.04601   0.04616
     Eigenvalues ---    0.04639   0.04653   0.04769   0.05159   0.05476
     Eigenvalues ---    0.05495   0.11054   0.11879   0.11988   0.12285
     Eigenvalues ---    0.12416   0.12604   0.12948   0.12985   0.13620
     Eigenvalues ---    0.14156   0.14288   0.14775   0.14966   0.18512
     Eigenvalues ---    0.18897   0.19355   0.19989   0.24128   0.26436
     Eigenvalues ---    0.27916   0.28541   0.28964   0.29741   0.32375
     Eigenvalues ---    0.32824   0.33018   0.33029   0.33266   0.33345
     Eigenvalues ---    0.33414   0.33508   0.33617   0.34080   0.34206
     Eigenvalues ---    0.34271   0.34413   0.34523   0.36992   0.43655
     Eigenvalues --- 1000.000001000.000001000.000001000.000001000.00000
     Eigenvalues --- 1000.000001000.000001000.000001000.000001000.00000
     Eigenvalues --- 1000.000001000.000001000.000001000.000001000.00000
     Eigenvalues --- 1000.000001000.000001000.000001000.000001000.00000
     Eigenvalues --- 1000.000001000.000001000.000001000.000001000.00000
     Eigenvalues --- 1000.000001000.000001000.000001000.000001000.00000
     Eigenvalues --- 1000.000001000.000001000.000001000.000001000.00000
     Eigenvalues --- 1000.000001000.000001000.000001000.000001000.00000
     Eigenvalues --- 1000.000001000.000001000.000001000.000001000.00000
     Eigenvalues --- 1000.000001000.000001000.00000
 RFO step:  Lambda= 0.00000000D+00.
 Quintic linear search produced a step of -0.94027.
 Iteration  1 RMS(Cart)=  0.00108271 RMS(Int)=  0.00000038
 Iteration  2 RMS(Cart)=  0.00000052 RMS(Int)=  0.00000000
 Variable       Old X    -DE/DX   Delta X   Delta X   Delta X     New X
                                 (Linear)    (Quad)   (Total)
    R1        2.77510   0.00000   0.00000   0.00000   0.00000   2.77510
    R2        2.77365   0.00000  -0.00001   0.00001   0.00000   2.77365
    R3        1.91865   0.00000   0.00000   0.00000   0.00000   1.91864
    R4        2.06689   0.00000  -0.00001   0.00000  -0.00001   2.06688
    R5        2.90534   0.00000   0.00000   0.00000   0.00000   2.90534
    R6        2.88930   0.00000   0.00000   0.00000   0.00000   2.88930
    R7        2.06547   0.00000   0.00000   0.00000   0.00000   2.06547
    R8        2.06253   0.00000   0.00000   0.00000   0.00000   2.06253
    R9        2.06839   0.00000   0.00000   0.00000   0.00000   2.06839
   R10        2.08374   0.00000   0.00000   0.00000   0.00000   2.08374
   R11        2.89101   0.00000   0.00001   0.00000   0.00001   2.89102
   R12        2.88853   0.00000   0.00000   0.00000   0.00000   2.88853
   R13        2.06443   0.00000   0.00000   0.00000   0.00000   2.06442
   R14        2.06426   0.00000   0.00000   0.00000   0.00000   2.06426
   R15        2.06234   0.00000   0.00000   0.00000   0.00000   2.06234
   R16        2.06371   0.00000   0.00000   0.00000   0.00001   2.06372
   R17        2.06895   0.00000   0.00000  -0.00001  -0.00001   2.06895
   R18        2.06071   0.00000   0.00000   0.00000   0.00000   2.06071
   R19        2.06291   0.00000   0.00000   0.00000   0.00000   2.06291
   R20        2.06447   0.00000   0.00001   0.00000   0.00000   2.06447
   R21        2.06696   0.00000   0.00000   0.00000   0.00000   2.06696
    A1        2.06968   0.00000  -0.00004   0.00001  -0.00003   2.06964
    A2        1.90277   0.00000   0.00000   0.00000   0.00001   1.90278
    A3        1.90895   0.00000   0.00006  -0.00003   0.00003   1.90898
    A4        1.86629   0.00000  -0.00001   0.00000  -0.00001   1.86628
    A5        2.00171   0.00000  -0.00004   0.00001  -0.00004   2.00168
    A6        1.89048   0.00000   0.00004  -0.00001   0.00003   1.89051
    A7        1.88634   0.00000   0.00001   0.00000   0.00001   1.88635
    A8        1.87810   0.00000   0.00001   0.00001   0.00002   1.87812
    A9        1.93600   0.00000   0.00000  -0.00001  -0.00001   1.93599
   A10        1.93550   0.00000   0.00003   0.00000   0.00003   1.93553
   A11        1.95381   0.00000  -0.00001   0.00000  -0.00001   1.95380
   A12        1.93002   0.00000  -0.00002   0.00001  -0.00002   1.93000
   A13        1.87620   0.00000   0.00000   0.00000   0.00000   1.87620
   A14        1.88148   0.00000   0.00000  -0.00001  -0.00001   1.88146
   A15        1.88412   0.00000   0.00001   0.00000   0.00001   1.88413
   A16        1.95144   0.00000   0.00000   0.00000   0.00000   1.95144
   A17        1.93429   0.00000  -0.00001   0.00001  -0.00001   1.93429
   A18        1.88989   0.00000   0.00003  -0.00001   0.00002   1.88991
   A19        1.88017   0.00000   0.00001   0.00000   0.00000   1.88017
   A20        1.87426   0.00000  -0.00001   0.00000   0.00000   1.87425
   A21        1.93330   0.00000  -0.00002   0.00001  -0.00002   1.93328
   A22        1.92290   0.00000  -0.00001   0.00001   0.00000   1.92290
   A23        1.92594   0.00000   0.00001   0.00000   0.00001   1.92595
   A24        1.95551   0.00000   0.00000   0.00000  -0.00001   1.95550
   A25        1.89683   0.00000   0.00001   0.00000   0.00001   1.89684
   A26        1.88666   0.00000  -0.00001   0.00000  -0.00001   1.88665
   A27        1.87423   0.00000  -0.00001   0.00000   0.00000   1.87423
   A28        1.93965   0.00000   0.00001   0.00001   0.00001   1.93966
   A29        1.93160   0.00000   0.00000  -0.00002  -0.00002   1.93158
   A30        1.92919   0.00000   0.00001  -0.00001   0.00000   1.92920
   A31        1.87728   0.00000   0.00000   0.00001   0.00001   1.87728
   A32        1.89913   0.00000   0.00001   0.00000   0.00001   1.89914
   A33        1.88526   0.00000  -0.00002   0.00001  -0.00001   1.88525
   A34        1.93427   0.00000   0.00000   0.00000   0.00000   1.93428
   A35        1.92752   0.00000   0.00001  -0.00001  -0.00001   1.92751
   A36        1.94037   0.00000   0.00002  -0.00001   0.00001   1.94038
   A37        1.89459   0.00000  -0.00003   0.00001  -0.00002   1.89457
   A38        1.87865   0.00000   0.00000   0.00001   0.00000   1.87865
   A39        1.88673   0.00000   0.00000   0.00001   0.00001   1.88674
    D1       -1.01029   0.00000   0.00094   0.00004   0.00098  -1.00931
    D2        1.08062   0.00000   0.00092   0.00004   0.00096   1.08158
    D3       -3.02983   0.00000   0.00091   0.00003   0.00094  -3.02889
    D4        3.07421   0.00000   0.00088   0.00008   0.00096   3.07517
    D5       -1.11806   0.00000   0.00086   0.00008   0.00094  -1.11713
    D6        1.05467   0.00000   0.00085   0.00007   0.00092   1.05559
    D7       -0.89378   0.00000   0.00094  -0.00019   0.00075  -0.89303
    D8        1.20418   0.00000   0.00094  -0.00019   0.00075   1.20493
    D9       -2.95520   0.00000   0.00093  -0.00019   0.00074  -2.95446
   D10        1.30194   0.00000   0.00097  -0.00021   0.00076   1.30269
   D11       -2.88329   0.00000   0.00097  -0.00021   0.00076  -2.88253
   D12       -0.75949   0.00000   0.00096  -0.00021   0.00075  -0.75874
   D13       -3.11307   0.00000   0.00042   0.00041   0.00083  -3.11225
   D14       -1.01775   0.00000   0.00043   0.00041   0.00084  -1.01691
   D15        1.08389   0.00000   0.00042   0.00042   0.00084   1.08473
   D16       -1.03335   0.00000   0.00039   0.00041   0.00080  -1.03256
   D17        1.06197   0.00000   0.00040   0.00041   0.00082   1.06279
   D18       -3.11958   0.00000   0.00039   0.00042   0.00081  -3.11877
   D19        1.02163   0.00000   0.00040   0.00042   0.00082   1.02245
   D20        3.11696   0.00000   0.00042   0.00042   0.00084   3.11779
   D21       -1.06459   0.00000   0.00040   0.00043   0.00083  -1.06376
   D22        3.08414   0.00000   0.00023   0.00010   0.00033   3.08447
   D23       -1.11435   0.00000   0.00023   0.00010   0.00033  -1.11402
   D24        0.97355   0.00000   0.00021   0.00009   0.00031   0.97385
   D25        1.07230   0.00000   0.00022   0.00009   0.00031   1.07261
   D26       -3.12620   0.00000   0.00022   0.00010   0.00031  -3.12588
   D27       -1.03830   0.00000   0.00020   0.00009   0.00029  -1.03801
   D28       -0.98770   0.00000   0.00020   0.00009   0.00030  -0.98740
   D29        1.09700   0.00000   0.00020   0.00009   0.00030   1.09729
   D30       -3.09829   0.00000   0.00019   0.00009   0.00027  -3.09802
   D31        1.00816   0.00000   0.00035   0.00004   0.00038   1.00855
   D32        3.10279   0.00000   0.00037   0.00004   0.00040   3.10319
   D33       -1.09294   0.00000   0.00037   0.00003   0.00040  -1.09254
   D34       -3.13511   0.00000   0.00034   0.00004   0.00038  -3.13472
   D35       -1.04048   0.00000   0.00036   0.00004   0.00040  -1.04008
   D36        1.04697   0.00000   0.00036   0.00004   0.00040   1.04737
   D37       -1.08997   0.00000   0.00033   0.00004   0.00037  -1.08960
   D38        1.00466   0.00000   0.00035   0.00004   0.00039   1.00505
   D39        3.09211   0.00000   0.00035   0.00004   0.00039   3.09250
   D40        3.13369   0.00000   0.00025   0.00002   0.00027   3.13397
   D41       -1.04929   0.00000   0.00022   0.00003   0.00024  -1.04904
   D42        1.04505   0.00000   0.00024   0.00002   0.00026   1.04530
   D43        1.02369   0.00000   0.00024   0.00002   0.00026   1.02395
   D44        3.12389   0.00000   0.00020   0.00003   0.00024   3.12413
   D45       -1.06496   0.00000   0.00023   0.00002   0.00025  -1.06471
   D46       -1.02507   0.00000   0.00025   0.00002   0.00027  -1.02480
   D47        1.07513   0.00000   0.00021   0.00003   0.00024   1.07537
   D48       -3.11372   0.00000   0.00023   0.00002   0.00025  -3.11347
         Item               Value     Threshold  Converged?
 Maximum Force            0.000001     0.000015     YES
 RMS     Force            0.000000     0.000010     YES
 Maximum Displacement     0.003491     0.000060     NO 
 RMS     Displacement     0.001083     0.000040     NO 
 Predicted change in Energy=-5.732721D-10
 GradGradGradGradGradGradGradGradGradGradGradGradGradGradGradGradGradGrad

                          Input orientation:                          
 ---------------------------------------------------------------------
 Center     Atomic     Atomic              Coordinates (Angstroms)
 Number     Number      Type              X           Y           Z
 ---------------------------------------------------------------------
    1          7             0       -0.086098   -0.326727   -0.041809
    2          6             0        0.596723    0.739810   -0.785318
    3          1             0       -0.138481    1.171387   -1.470518
    4          6             0        1.157962    1.873653    0.088258
    5          1             0        1.625413    2.645809   -0.528118
    6          1             0        0.378833    2.354840    0.682116
    7          1             0        1.917589    1.489331    0.776222
    8          6             0       -1.282967    0.014945    0.736051
    9          1             0       -1.105728    0.873796    1.404510
   10          6             0       -2.447373    0.376454   -0.188040
   11          1             0       -2.662238   -0.453138   -0.865572
   12          1             0       -3.344253    0.591427    0.397319
   13          1             0       -2.232276    1.259988   -0.791477
   14          6             0        1.700645    0.104867   -1.631427
   15          1             0        2.202446    0.852545   -2.249325
   16          1             0        2.459231   -0.358568   -0.992324
   17          1             0        1.288262   -0.668356   -2.280437
   18          6             0       -1.640973   -1.182512    1.616039
   19          1             0       -2.524645   -0.969495    2.220553
   20          1             0       -1.844950   -2.061291    0.999893
   21          1             0       -0.823383   -1.429014    2.299530
   22          1             0        0.585545   -0.792418    0.560577
 ---------------------------------------------------------------------
                    Distance matrix (angstroms):
                    1          2          3          4          5
     1  N    0.000000
     2  C    1.468520   0.000000
     3  H    2.070821   1.093747   0.000000
     4  C    2.531062   1.537441   2.145629   0.000000
     5  H    3.464352   2.181098   2.484625   1.093002   0.000000
     6  H    2.816208   2.192979   2.510379   1.091444   1.761616
     7  H    2.825244   2.178274   3.062083   1.094546   1.767515
     8  C    1.467754   2.524525   2.741560   3.135693   4.120467
     9  H    2.138397   2.776984   3.047936   2.802950   3.786055
    10  C    2.468090   3.123346   2.758197   3.913615   4.674742
    11  H    2.707593   3.471367   3.061762   4.573584   5.301065
    12  H    3.413417   4.117273   3.755282   4.691435   5.456601
    13  H    2.772318   2.876432   2.202936   3.555873   4.107508
    14  C    2.430146   1.528953   2.132075   2.525951   2.771162
    15  H    3.391349   2.175862   2.487597   2.756430   2.551728
    16  H    2.717203   2.172147   3.052465   2.800674   3.152305
    17  H    2.648968   2.167149   2.464998   3.476996   3.764038
    18  C    2.428675   3.803829   4.162349   4.416820   5.470167
    19  H    3.387911   4.658317   4.888881   5.117789   6.152121
    20  H    2.680936   4.122489   4.411935   5.033125   6.044422
    21  H    2.690816   4.029489   4.630813   4.441065   5.531399
    22  H    1.015303   2.039430   2.916519   2.767432   3.753396
                    6          7          8          9         10
     6  H    0.000000
     7  H    1.767974   0.000000
     8  C    2.870469   3.524059   0.000000
     9  H    2.217942   3.148663   1.102668   0.000000
    10  C    3.557895   4.606647   1.529861   2.140929   0.000000
    11  H    4.419070   5.238653   2.164875   3.055610   1.092446
    12  H    4.129419   5.351335   2.167018   2.470862   1.092361
    13  H    3.191875   4.442034   2.187387   2.498122   1.091345
    14  C    3.487412   2.785781   3.809854   4.205223   4.400361
    15  H    3.765076   3.104927   4.664992   4.928994   5.108461
    16  H    3.807150   2.614549   4.138943   4.469058   5.026121
    17  H    4.329375   3.794052   4.022104   4.657066   4.407348
    18  C    4.179077   4.528510   1.528545   2.135330   2.517014
    19  H    4.674203   5.278765   2.171320   2.465151   2.760230
    20  H    4.954635   5.178190   2.167071   3.053671   2.777895
    21  H    4.287061   4.283706   2.177315   2.486707   3.476358
    22  H    3.156379   2.650891   2.043028   2.519702   3.335458
                   11         12         13         14         15
    11  H    0.000000
    12  H    1.775149   0.000000
    13  H    1.767812   1.759745   0.000000
    14  C    4.464600   5.459263   4.184220   0.000000
    15  H    5.223479   6.151323   4.685947   1.092074   0.000000
    16  H    5.123910   6.042684   4.966921   1.094841   1.764309
    17  H    4.201739   5.497055   4.281320   1.090480   1.774779
    18  C    2.780892   2.744686   3.480169   4.834231   5.818450
    19  H    3.132047   2.536221   3.758776   5.817652   6.756110
    20  H    2.595009   3.106110   3.793405   4.918062   5.952250
    21  H    3.788349   3.749049   4.332440   4.916902   5.920577
    22  H    3.563299   4.169531   3.739055   2.617909   3.635357
                   16         17         18         19         20
    16  H    0.000000
    17  H    1.768155   0.000000
    18  C    4.928906   4.901765   0.000000
    19  H    5.961110   5.906594   1.091645   0.000000
    20  H    5.039263   4.745298   1.092473   1.773137   0.000000
    21  H    4.770504   5.100367   1.093790   1.763998   1.769868
    22  H    2.471928   2.929260   2.494705   3.529895   2.776751
                   21         22
    21  H    0.000000
    22  H    2.326863   0.000000
 Stoichiometry    C6H15N
 Framework group  C1[X(C6H15N)]
 Deg. of freedom    60
 Full point group                 C1
 Largest Abelian subgroup         C1      NOp   1
 Largest concise Abelian subgroup C1      NOp   1
                         Standard orientation:                         
 ---------------------------------------------------------------------
 Center     Atomic     Atomic              Coordinates (Angstroms)
 Number     Number      Type              X           Y           Z
 ---------------------------------------------------------------------
    1          7             0       -0.013460   -0.590391   -0.091607
    2          6             0        1.240664    0.164549   -0.209035
    3          1             0        1.087135    0.918199   -0.986675
    4          6             0        1.678063    0.886881    1.075738
    5          1             0        2.599433    1.451386    0.911225
    6          1             0        0.920543    1.590061    1.426384
    7          1             0        1.866035    0.165899    1.877537
    8          6             0       -1.246226    0.140775    0.224603
    9          1             0       -1.122982    0.788790    1.108212
   10          6             0       -1.668619    1.027690   -0.948189
   11          1             0       -1.809234    0.422451   -1.846716
   12          1             0       -2.606999    1.538088   -0.719739
   13          1             0       -0.925292    1.795484   -1.169528
   14          6             0        2.331480   -0.788819   -0.697818
   15          1             0        3.273919   -0.260467   -0.856810
   16          1             0        2.514936   -1.576878    0.039734
   17          1             0        2.033002   -1.264548   -1.632559
   18          6             0       -2.337013   -0.878120    0.553977
   19          1             0       -3.273857   -0.376604    0.803965
   20          1             0       -2.512792   -1.537927   -0.298815
   21          1             0       -2.053836   -1.497284    1.410027
   22          1             0        0.114119   -1.341650    0.579342
 ---------------------------------------------------------------------
 Rotational constants (GHZ):      4.1089202      1.4100233      1.3674429
 Standard basis: TZVP (5D, 7F)
 There are   223 symmetry adapted basis functions of A   symmetry.
 Integral buffers will be    131072 words long.
 Raffenetti 2 integral format.
 Two-electron integral symmetry is turned on.
   223 basis functions,   365 primitive gaussians,   230 cartesian basis functions
    29 alpha electrons       29 beta electrons
       nuclear repulsion energy       334.8174536896 Hartrees.
 NAtoms=   22 NActive=   22 NUniq=   22 SFac= 7.50D-01 NAtFMM=   80 NAOKFM=F Big=F
 One-electron integrals computed using PRISM.
 NBasis=   223 RedAO= T  NBF=   223
 NBsUse=   223 1.00D-06 NBFU=   223
 Initial guess read from the read-write file:
 Initial guess orbital symmetries:
       Occupied  (A) (A) (A) (A) (A) (A) (A) (A) (A) (A) (A) (A)
                 (A) (A) (A) (A) (A) (A) (A) (A) (A) (A) (A) (A)
                 (A) (A) (A) (A) (A)
       Virtual   (A) (A) (A) (A) (A) (A) (A) (A) (A) (A) (A) (A)
                 (A) (A) (A) (A) (A) (A) (A) (A) (A) (A) (A) (A)
                 (A) (A) (A) (A) (A) (A) (A) (A) (A) (A) (A) (A)
                 (A) (A) (A) (A) (A) (A) (A) (A) (A) (A) (A) (A)
                 (A) (A) (A) (A) (A) (A) (A) (A) (A) (A) (A) (A)
                 (A) (A) (A) (A) (A) (A) (A) (A) (A) (A) (A) (A)
                 (A) (A) (A) (A) (A) (A) (A) (A) (A) (A) (A) (A)
                 (A) (A) (A) (A) (A) (A) (A) (A) (A) (A) (A) (A)
                 (A) (A) (A) (A) (A) (A) (A) (A) (A) (A) (A) (A)
                 (A) (A) (A) (A) (A) (A) (A) (A) (A) (A) (A) (A)
                 (A) (A) (A) (A) (A) (A) (A) (A) (A) (A) (A) (A)
                 (A) (A) (A) (A) (A) (A) (A) (A) (A) (A) (A) (A)
                 (A) (A) (A) (A) (A) (A) (A) (A) (A) (A) (A) (A)
                 (A) (A) (A) (A) (A) (A) (A) (A) (A) (A) (A) (A)
                 (A) (A) (A) (A) (A) (A) (A) (A) (A) (A) (A) (A)
                 (A) (A) (A) (A) (A) (A) (A) (A) (A) (A) (A) (A)
                 (A) (A)
 Requested convergence on RMS density matrix=1.00D-08 within 128 cycles.
 Requested convergence on MAX density matrix=1.00D-06.
 Requested convergence on             energy=1.00D-06.
 No special actions if energy rises.
 Keep R1 integrals in memory in canonical form, NReq=   360237084.
 SCF Done:  E(RB+HF-LYP) =  -292.532678789     A.U. after    7 cycles
             Convg  =    0.2704D-08             -V/T =  2.0057
             S**2   =   0.0000
 Range of M.O.s used for correlation:     1   223
 NBasis=   223 NAE=    29 NBE=    29 NFC=     0 NFV=     0
 NROrb=    223 NOA=    29 NOB=    29 NVA=   194 NVB=   194

 **** Warning!!: The largest alpha MO coefficient is  0.15177623D+02

 Symmetrizing basis deriv contribution to polar:
 IMax=3 JMax=2 DiffMx= 0.00D+00
 G2DrvN: will do   23 centers at a time, making    1 passes doing MaxLOS=2.
 FoFDir/FoFCou used for L=0 through L=2.
 DoAtom=TTTTTTTTTTTTTTTTTTTTTT
          Differentiating once with respect to electric field.
                with respect to dipole field.
          Differentiating once with respect to nuclear coordinates.
          Store integrals in memory, NReq=   353689553.
          There are  69 degrees of freedom in the 1st order CPHF.
    66 vectors were produced by pass  0.
 AX will form  66 AO Fock derivatives at one time.
    66 vectors were produced by pass  1.
    66 vectors were produced by pass  2.
    66 vectors were produced by pass  3.
    66 vectors were produced by pass  4.
    31 vectors were produced by pass  5.
     3 vectors were produced by pass  6.
     1 vectors were produced by pass  7.
 Inv2:  IOpt= 1 Iter= 1 AM= 3.06D-15 Conv= 1.00D-12.
 Inverted reduced A of dimension  365 with in-core refinement.
 Isotropic polarizability for W=    0.000000       83.34 Bohr**3.
 End of Minotr Frequency-dependent properties file   721 does not exist.
 ***** Axes restored to original set *****
 -------------------------------------------------------------------
 Center     Atomic                   Forces (Hartrees/Bohr)
 Number     Number              X              Y              Z
 -------------------------------------------------------------------
    1          7          -0.000000224   -0.000000512   -0.000000336
    2          6          -0.000001325    0.000001815   -0.000000526
    3          1          -0.000002228    0.000001857    0.000000930
    4          6          -0.000001784    0.000001371    0.000000976
    5          1          -0.000002334    0.000002338    0.000001564
    6          1          -0.000001467    0.000000026    0.000001911
    7          1          -0.000000816    0.000000921    0.000000040
    8          6           0.000001214   -0.000001571    0.000000771
    9          1           0.000000942   -0.000002962    0.000001837
   10          6          -0.000000003   -0.000001469    0.000001985
   11          1           0.000000163   -0.000000953    0.000000906
   12          1          -0.000000040   -0.000003912    0.000003231
   13          1          -0.000001876   -0.000000524    0.000003470
   14          6          -0.000001214    0.000004514   -0.000001934
   15          1          -0.000002785    0.000005476   -0.000001654
   16          1          -0.000000095    0.000004202   -0.000003410
   17          1          -0.000001125    0.000004524   -0.000002608
   18          6           0.000002456   -0.000003507   -0.000001002
   19          1           0.000003438   -0.000005167    0.000000525
   20          1           0.000002937   -0.000002874   -0.000001818
   21          1           0.000003854   -0.000003925   -0.000002050
   22          1           0.000002311    0.000000332   -0.000002807
 -------------------------------------------------------------------
 Cartesian Forces:  Max     0.000005476 RMS     0.000002331

 GradGradGradGradGradGradGradGradGradGradGradGradGradGradGradGradGradGrad
 Berny optimization.
 Internal  Forces:  Max     0.000000695 RMS     0.000000261
 Search for a local minimum.
 Step number  14 out of a maximum of 118
 All quantities printed in internal units (Hartrees-Bohrs-Radians)
 Second derivative matrix not updated -- analytic derivatives used.
 Trust test=-2.78D+01 RLast= 1.36D-03 DXMaxT set to 5.00D-02
     Eigenvalues ---    0.00083   0.00204   0.00273   0.00298   0.00306
     Eigenvalues ---    0.00496   0.01823   0.03985   0.04176   0.04397
     Eigenvalues ---    0.04426   0.04489   0.04526   0.04600   0.04616
     Eigenvalues ---    0.04640   0.04653   0.04769   0.05159   0.05476
     Eigenvalues ---    0.05495   0.11054   0.11879   0.11988   0.12285
     Eigenvalues ---    0.12416   0.12605   0.12947   0.12985   0.13620
     Eigenvalues ---    0.14157   0.14288   0.14774   0.14966   0.18512
     Eigenvalues ---    0.18897   0.19354   0.19988   0.24128   0.26436
     Eigenvalues ---    0.27915   0.28540   0.28965   0.29742   0.32376
     Eigenvalues ---    0.32824   0.33018   0.33029   0.33266   0.33345
     Eigenvalues ---    0.33414   0.33508   0.33617   0.34081   0.34206
     Eigenvalues ---    0.34271   0.34413   0.34523   0.36992   0.43656
     Eigenvalues --- 1000.000001000.000001000.000001000.000001000.00000
     Eigenvalues --- 1000.000001000.000001000.000001000.000001000.00000
     Eigenvalues --- 1000.000001000.000001000.000001000.000001000.00000
     Eigenvalues --- 1000.000001000.000001000.000001000.000001000.00000
     Eigenvalues --- 1000.000001000.000001000.000001000.000001000.00000
     Eigenvalues --- 1000.000001000.000001000.000001000.000001000.00000
     Eigenvalues --- 1000.000001000.000001000.000001000.000001000.00000
     Eigenvalues --- 1000.000001000.000001000.000001000.000001000.00000
     Eigenvalues --- 1000.000001000.000001000.000001000.000001000.00000
     Eigenvalues --- 1000.000001000.000001000.00000
 RFO step:  Lambda=-1.16867004D-08.
 Quintic linear search produced a step of -0.89627.
 Iteration  1 RMS(Cart)=  0.00099331 RMS(Int)=  0.00000033
 Iteration  2 RMS(Cart)=  0.00000045 RMS(Int)=  0.00000000
 Variable       Old X    -DE/DX   Delta X   Delta X   Delta X     New X
                                 (Linear)    (Quad)   (Total)
    R1        2.77510   0.00000   0.00000   0.00000   0.00000   2.77510
    R2        2.77365   0.00000  -0.00001   0.00001   0.00000   2.77365
    R3        1.91864   0.00000   0.00000   0.00000   0.00000   1.91865
    R4        2.06688   0.00000   0.00000   0.00001   0.00001   2.06689
    R5        2.90534   0.00000   0.00000   0.00000   0.00000   2.90534
    R6        2.88930   0.00000   0.00000   0.00000   0.00000   2.88930
    R7        2.06547   0.00000   0.00000   0.00000   0.00000   2.06547
    R8        2.06253   0.00000   0.00000   0.00000   0.00000   2.06253
    R9        2.06839   0.00000   0.00000   0.00000   0.00000   2.06839
   R10        2.08374   0.00000   0.00000   0.00000   0.00000   2.08374
   R11        2.89102   0.00000   0.00000  -0.00001  -0.00001   2.89101
   R12        2.88853   0.00000   0.00000   0.00000   0.00000   2.88853
   R13        2.06442   0.00000   0.00000   0.00000   0.00000   2.06443
   R14        2.06426   0.00000   0.00000   0.00000   0.00000   2.06426
   R15        2.06234   0.00000   0.00000   0.00000   0.00000   2.06234
   R16        2.06372   0.00000   0.00000   0.00000  -0.00001   2.06371
   R17        2.06895   0.00000   0.00001   0.00000   0.00000   2.06895
   R18        2.06071   0.00000   0.00000   0.00000   0.00000   2.06071
   R19        2.06291   0.00000   0.00000   0.00000   0.00000   2.06291
   R20        2.06447   0.00000   0.00000  -0.00001   0.00000   2.06447
   R21        2.06696   0.00000   0.00000   0.00000   0.00000   2.06696
    A1        2.06964   0.00000  -0.00001   0.00004   0.00003   2.06968
    A2        1.90278   0.00000   0.00000   0.00000  -0.00001   1.90277
    A3        1.90898   0.00000   0.00003  -0.00006  -0.00003   1.90895
    A4        1.86628   0.00000   0.00000   0.00001   0.00001   1.86629
    A5        2.00168   0.00000  -0.00001   0.00004   0.00003   2.00171
    A6        1.89051   0.00000   0.00001  -0.00004  -0.00003   1.89048
    A7        1.88635   0.00000   0.00000  -0.00001  -0.00001   1.88634
    A8        1.87812   0.00000  -0.00001  -0.00001  -0.00002   1.87810
    A9        1.93599   0.00000   0.00001   0.00000   0.00001   1.93600
   A10        1.93553   0.00000   0.00000  -0.00003  -0.00002   1.93550
   A11        1.95380   0.00000   0.00000   0.00001   0.00001   1.95381
   A12        1.93000   0.00000  -0.00001   0.00002   0.00002   1.93002
   A13        1.87620   0.00000   0.00000   0.00000   0.00000   1.87620
   A14        1.88146   0.00000   0.00001   0.00000   0.00001   1.88147
   A15        1.88413   0.00000   0.00000  -0.00001  -0.00001   1.88412
   A16        1.95144   0.00000   0.00000   0.00000   0.00000   1.95144
   A17        1.93429   0.00000  -0.00001   0.00001   0.00000   1.93429
   A18        1.88991   0.00000   0.00001  -0.00003  -0.00002   1.88989
   A19        1.88017   0.00000   0.00000  -0.00001   0.00000   1.88017
   A20        1.87425   0.00000   0.00000   0.00001   0.00000   1.87426
   A21        1.93328   0.00000  -0.00001   0.00002   0.00001   1.93330
   A22        1.92290   0.00000  -0.00001   0.00001   0.00000   1.92290
   A23        1.92595   0.00000   0.00000  -0.00001  -0.00001   1.92594
   A24        1.95550   0.00000   0.00000   0.00000   0.00001   1.95550
   A25        1.89684   0.00000   0.00000  -0.00001  -0.00001   1.89684
   A26        1.88665   0.00000   0.00000   0.00001   0.00001   1.88666
   A27        1.87423   0.00000   0.00000   0.00001   0.00000   1.87423
   A28        1.93966   0.00000   0.00000  -0.00001  -0.00001   1.93965
   A29        1.93158   0.00000   0.00002   0.00000   0.00002   1.93160
   A30        1.92920   0.00000   0.00001  -0.00001   0.00000   1.92919
   A31        1.87728   0.00000  -0.00001   0.00000  -0.00001   1.87728
   A32        1.89914   0.00000   0.00000  -0.00001  -0.00001   1.89913
   A33        1.88525   0.00000  -0.00001   0.00002   0.00001   1.88526
   A34        1.93428   0.00000   0.00000   0.00000   0.00000   1.93427
   A35        1.92751   0.00000   0.00001  -0.00001   0.00001   1.92752
   A36        1.94038   0.00000   0.00001  -0.00002  -0.00001   1.94037
   A37        1.89457   0.00000  -0.00001   0.00003   0.00002   1.89458
   A38        1.87865   0.00000  -0.00001   0.00000   0.00000   1.87865
   A39        1.88674   0.00000  -0.00001   0.00000  -0.00001   1.88673
    D1       -1.00931   0.00000   0.00002  -0.00093  -0.00091  -1.01022
    D2        1.08158   0.00000   0.00001  -0.00091  -0.00090   1.08068
    D3       -3.02889   0.00000   0.00002  -0.00091  -0.00088  -3.02977
    D4        3.07517   0.00000  -0.00002  -0.00087  -0.00089   3.07428
    D5       -1.11713   0.00000  -0.00002  -0.00085  -0.00088  -1.11800
    D6        1.05559   0.00000  -0.00001  -0.00085  -0.00086   1.05473
    D7       -0.89303   0.00000   0.00022  -0.00088  -0.00066  -0.89369
    D8        1.20493   0.00000   0.00022  -0.00088  -0.00066   1.20427
    D9       -2.95446   0.00000   0.00022  -0.00087  -0.00065  -2.95511
   D10        1.30269   0.00000   0.00024  -0.00091  -0.00067   1.30203
   D11       -2.88253   0.00000   0.00024  -0.00091  -0.00067  -2.88320
   D12       -0.75874   0.00000   0.00024  -0.00090  -0.00066  -0.75940
   D13       -3.11225   0.00000  -0.00034  -0.00049  -0.00082  -3.11307
   D14       -1.01691   0.00000  -0.00034  -0.00050  -0.00084  -1.01775
   D15        1.08473   0.00000  -0.00035  -0.00049  -0.00083   1.08389
   D16       -1.03256   0.00000  -0.00035  -0.00046  -0.00080  -1.03336
   D17        1.06279   0.00000  -0.00035  -0.00047  -0.00082   1.06197
   D18       -3.11877   0.00000  -0.00035  -0.00046  -0.00081  -3.11958
   D19        1.02245   0.00000  -0.00035  -0.00047  -0.00082   1.02163
   D20        3.11779   0.00000  -0.00035  -0.00048  -0.00084   3.11696
   D21       -1.06376   0.00000  -0.00036  -0.00047  -0.00083  -1.06459
   D22        3.08447   0.00000  -0.00007  -0.00026  -0.00033   3.08414
   D23       -1.11402   0.00000  -0.00008  -0.00026  -0.00033  -1.11435
   D24        0.97385   0.00000  -0.00007  -0.00024  -0.00031   0.97354
   D25        1.07261   0.00000  -0.00007  -0.00025  -0.00032   1.07229
   D26       -3.12588   0.00000  -0.00007  -0.00024  -0.00032  -3.12620
   D27       -1.03801   0.00000  -0.00007  -0.00023  -0.00030  -1.03831
   D28       -0.98740   0.00000  -0.00007  -0.00023  -0.00030  -0.98770
   D29        1.09729   0.00000  -0.00007  -0.00023  -0.00030   1.09699
   D30       -3.09802   0.00000  -0.00007  -0.00021  -0.00028  -3.09830
   D31        1.00855   0.00000  -0.00001  -0.00030  -0.00031   1.00823
   D32        3.10319   0.00000  -0.00001  -0.00032  -0.00033   3.10287
   D33       -1.09254   0.00000  -0.00001  -0.00032  -0.00033  -1.09287
   D34       -3.13472   0.00000  -0.00001  -0.00030  -0.00031  -3.13503
   D35       -1.04008   0.00000  -0.00001  -0.00031  -0.00033  -1.04040
   D36        1.04737   0.00000  -0.00001  -0.00031  -0.00033   1.04705
   D37       -1.08960   0.00000  -0.00002  -0.00028  -0.00030  -1.08990
   D38        1.00505   0.00000  -0.00002  -0.00030  -0.00032   1.00473
   D39        3.09250   0.00000  -0.00002  -0.00030  -0.00032   3.09218
   D40        3.13397   0.00000   0.00000  -0.00022  -0.00023   3.13374
   D41       -1.04904   0.00000  -0.00001  -0.00019  -0.00020  -1.04924
   D42        1.04530   0.00000   0.00000  -0.00021  -0.00021   1.04509
   D43        1.02395   0.00000  -0.00001  -0.00021  -0.00022   1.02373
   D44        3.12413   0.00000  -0.00002  -0.00018  -0.00019   3.12394
   D45       -1.06471   0.00000  -0.00001  -0.00020  -0.00020  -1.06491
   D46       -1.02480   0.00000  -0.00001  -0.00022  -0.00022  -1.02503
   D47        1.07537   0.00000  -0.00001  -0.00018  -0.00020   1.07518
   D48       -3.11347   0.00000  -0.00001  -0.00020  -0.00021  -3.11368
         Item               Value     Threshold  Converged?
 Maximum Force            0.000001     0.000015     YES
 RMS     Force            0.000000     0.000010     YES
 Maximum Displacement     0.003272     0.000060     NO 
 RMS     Displacement     0.000993     0.000040     NO 
 Predicted change in Energy=-2.104200D-09
 GradGradGradGradGradGradGradGradGradGradGradGradGradGradGradGradGradGrad

                          Input orientation:                          
 ---------------------------------------------------------------------
 Center     Atomic     Atomic              Coordinates (Angstroms)
 Number     Number      Type              X           Y           Z
 ---------------------------------------------------------------------
    1          7             0       -0.086068   -0.326950   -0.041891
    2          6             0        0.596619    0.739526   -0.785609
    3          1             0       -0.138494    1.170529   -1.471275
    4          6             0        1.157134    1.873977    0.087641
    5          1             0        1.625238    2.645607   -0.528896
    6          1             0        0.377489    2.355703    0.680384
    7          1             0        1.916064    1.490118    0.776631
    8          6             0       -1.282688    0.014779    0.736327
    9          1             0       -1.105008    0.873195    1.405227
   10          6             0       -2.447081    0.377261   -0.187393
   11          1             0       -2.662176   -0.451753   -0.865561
   12          1             0       -3.343869    0.591950    0.398207
   13          1             0       -2.231850    1.261230   -0.790145
   14          6             0        1.701058    0.104595   -1.631049
   15          1             0        2.202586    0.852126   -2.249343
   16          1             0        2.459766   -0.358011   -0.991488
   17          1             0        1.289216   -0.669271   -2.279637
   18          6             0       -1.641021   -1.183022    1.615712
   19          1             0       -2.524385   -0.969911    2.220645
   20          1             0       -1.845630   -2.061334    0.999112
   21          1             0       -0.823332   -1.430339    2.298789
   22          1             0        0.585716   -0.792671    0.560316
 ---------------------------------------------------------------------
                    Distance matrix (angstroms):
                    1          2          3          4          5
     1  N    0.000000
     2  C    1.468520   0.000000
     3  H    2.070829   1.093752   0.000000
     4  C    2.531089   1.537440   2.145625   0.000000
     5  H    3.464367   2.181078   2.484891   1.093002   0.000000
     6  H    2.816593   2.192985   2.510082   1.091444   1.761613
     7  H    2.824933   2.178283   3.062095   1.094546   1.767523
     8  C    1.467754   2.524548   2.741978   3.135305   4.120446
     9  H    2.138396   2.777259   3.049069   2.802656   3.786360
    10  C    2.468090   3.123013   2.758116   3.912310   4.673949
    11  H    2.707460   3.470632   3.060664   4.572170   5.299897
    12  H    3.413405   4.117117   3.755549   4.690317   5.456103
    13  H    2.772469   2.876184   2.203249   3.554037   4.106322
    14  C    2.430118   1.528951   2.132064   2.525957   2.770782
    15  H    3.391313   2.175850   2.487454   2.756563   2.551439
    16  H    2.717346   2.172163   3.052472   2.800561   3.151531
    17  H    2.648792   2.167146   2.465091   3.477005   3.763831
    18  C    2.428659   3.803889   4.162485   4.417003   5.470484
    19  H    3.387899   4.658370   4.889196   5.117713   6.152343
    20  H    2.681013   4.122454   4.411584   5.033294   6.044587
    21  H    2.690689   4.029651   4.631080   4.441838   5.532146
    22  H    1.015304   2.039427   2.916505   2.767843   3.753498
                    6          7          8          9         10
     6  H    0.000000
     7  H    1.767969   0.000000
     8  C    2.870408   3.522820   0.000000
     9  H    2.218338   3.146840   1.102668   0.000000
    10  C    3.556046   4.604870   1.529857   2.140923   0.000000
    11  H    4.417162   5.237169   2.164875   3.055608   1.092448
    12  H    4.127827   5.349468   2.167007   2.470970   1.092359
    13  H    3.188883   4.439861   2.187388   2.498000   1.091346
    14  C    3.487412   2.786184   3.809892   4.205202   4.400630
    15  H    3.764973   3.105744   4.665030   4.929148   5.108477
    16  H    3.807266   2.614849   4.138874   4.468526   5.026365
    17  H    4.329369   3.794295   4.022270   4.657224   4.408246
    18  C    4.179928   4.527978   1.528545   2.135332   2.517023
    19  H    4.674718   5.277737   2.171319   2.465072   2.760343
    20  H    4.955205   5.178093   2.167073   3.053672   2.777820
    21  H    4.288976   4.283728   2.177307   2.486777   3.476360
    22  H    3.157536   2.650989   2.043010   2.519430   3.335516
                   11         12         13         14         15
    11  H    0.000000
    12  H    1.775143   0.000000
    13  H    1.767818   1.759745   0.000000
    14  C    4.464673   5.459550   4.184817   0.000000
    15  H    5.223109   6.151453   4.686240   1.092071   0.000000
    16  H    5.124348   6.042836   4.967267   1.094843   1.764305
    17  H    4.202431   5.497909   4.282911   1.090482   1.774771
    18  C    2.781048   2.744547   3.480172   4.834140   5.818401
    19  H    3.132433   2.536187   3.758779   5.817601   6.756098
    20  H    2.595092   3.105757   3.793421   4.918129   5.952206
    21  H    3.788415   3.748997   4.332434   4.916523   5.920416
    22  H    3.563447   4.169544   3.739109   2.617472   3.635080
                   16         17         18         19         20
    16  H    0.000000
    17  H    1.768163   0.000000
    18  C    4.928954   4.901426   0.000000
    19  H    5.961039   5.906477   1.091647   0.000000
    20  H    5.039864   4.745028   1.092470   1.773148   0.000000
    21  H    4.770172   5.099419   1.093790   1.763996   1.769861
    22  H    2.471657   2.928391   2.494913   3.529991   2.777317
                   21         22
    21  H    0.000000
    22  H    2.326870   0.000000
 Stoichiometry    C6H15N
 Framework group  C1[X(C6H15N)]
 Deg. of freedom    60
 Full point group                 C1
 Largest Abelian subgroup         C1      NOp   1
 Largest concise Abelian subgroup C1      NOp   1
                         Standard orientation:                         
 ---------------------------------------------------------------------
 Center     Atomic     Atomic              Coordinates (Angstroms)
 Number     Number      Type              X           Y           Z
 ---------------------------------------------------------------------
    1          7             0       -0.013460   -0.590647   -0.091210
    2          6             0        1.240653    0.164195   -0.209378
    3          1             0        1.087333    0.916659   -0.988213
    4          6             0        1.677643    0.888505    1.074419
    5          1             0        2.599483    1.452127    0.909512
    6          1             0        0.920346    1.592794    1.423315
    7          1             0        1.864610    0.168826    1.877623
    8          6             0       -1.246196    0.140724    0.224639
    9          1             0       -1.123039    0.788883    1.108153
   10          6             0       -1.668267    1.027478   -0.948385
   11          1             0       -1.808483    0.422143   -1.846911
   12          1             0       -2.606798    1.537768   -0.720321
   13          1             0       -0.924961    1.795353   -1.169518
   14          6             0        2.331647   -0.789865   -0.696404
   15          1             0        3.274019   -0.261649   -0.856221
   16          1             0        2.515161   -1.576629    0.042519
   17          1             0        2.033328   -1.267240   -1.630357
   18          6             0       -2.337147   -0.878000    0.553999
   19          1             0       -3.273923   -0.376335    0.803948
   20          1             0       -2.512984   -1.537817   -0.298770
   21          1             0       -2.054084   -1.497174    1.410080
   22          1             0        0.114212   -1.341399    0.580292
 ---------------------------------------------------------------------
 Rotational constants (GHZ):      4.1090548      1.4103563      1.3672853
 Standard basis: TZVP (5D, 7F)
 There are   223 symmetry adapted basis functions of A   symmetry.
 Integral buffers will be    131072 words long.
 Raffenetti 2 integral format.
 Two-electron integral symmetry is turned on.
   223 basis functions,   365 primitive gaussians,   230 cartesian basis functions
    29 alpha electrons       29 beta electrons
       nuclear repulsion energy       334.8218290915 Hartrees.
 NAtoms=   22 NActive=   22 NUniq=   22 SFac= 7.50D-01 NAtFMM=   80 NAOKFM=F Big=F
 One-electron integrals computed using PRISM.
 NBasis=   223 RedAO= T  NBF=   223
 NBsUse=   223 1.00D-06 NBFU=   223
 Initial guess read from the read-write file:
 Initial guess orbital symmetries:
       Occupied  (A) (A) (A) (A) (A) (A) (A) (A) (A) (A) (A) (A)
                 (A) (A) (A) (A) (A) (A) (A) (A) (A) (A) (A) (A)
                 (A) (A) (A) (A) (A)
       Virtual   (A) (A) (A) (A) (A) (A) (A) (A) (A) (A) (A) (A)
                 (A) (A) (A) (A) (A) (A) (A) (A) (A) (A) (A) (A)
                 (A) (A) (A) (A) (A) (A) (A) (A) (A) (A) (A) (A)
                 (A) (A) (A) (A) (A) (A) (A) (A) (A) (A) (A) (A)
                 (A) (A) (A) (A) (A) (A) (A) (A) (A) (A) (A) (A)
                 (A) (A) (A) (A) (A) (A) (A) (A) (A) (A) (A) (A)
                 (A) (A) (A) (A) (A) (A) (A) (A) (A) (A) (A) (A)
                 (A) (A) (A) (A) (A) (A) (A) (A) (A) (A) (A) (A)
                 (A) (A) (A) (A) (A) (A) (A) (A) (A) (A) (A) (A)
                 (A) (A) (A) (A) (A) (A) (A) (A) (A) (A) (A) (A)
                 (A) (A) (A) (A) (A) (A) (A) (A) (A) (A) (A) (A)
                 (A) (A) (A) (A) (A) (A) (A) (A) (A) (A) (A) (A)
                 (A) (A) (A) (A) (A) (A) (A) (A) (A) (A) (A) (A)
                 (A) (A) (A) (A) (A) (A) (A) (A) (A) (A) (A) (A)
                 (A) (A) (A) (A) (A) (A) (A) (A) (A) (A) (A) (A)
                 (A) (A) (A) (A) (A) (A) (A) (A) (A) (A) (A) (A)
                 (A) (A)
 Requested convergence on RMS density matrix=1.00D-08 within 128 cycles.
 Requested convergence on MAX density matrix=1.00D-06.
 Requested convergence on             energy=1.00D-06.
 No special actions if energy rises.
 Keep R1 integrals in memory in canonical form, NReq=   360237084.
 SCF Done:  E(RB+HF-LYP) =  -292.532678697     A.U. after    7 cycles
             Convg  =    0.2481D-08             -V/T =  2.0057
             S**2   =   0.0000
 Range of M.O.s used for correlation:     1   223
 NBasis=   223 NAE=    29 NBE=    29 NFC=     0 NFV=     0
 NROrb=    223 NOA=    29 NOB=    29 NVA=   194 NVB=   194

 **** Warning!!: The largest alpha MO coefficient is  0.15178051D+02

 Symmetrizing basis deriv contribution to polar:
 IMax=3 JMax=2 DiffMx= 0.00D+00
 G2DrvN: will do   23 centers at a time, making    1 passes doing MaxLOS=2.
 FoFDir/FoFCou used for L=0 through L=2.
 DoAtom=TTTTTTTTTTTTTTTTTTTTTT
          Differentiating once with respect to electric field.
                with respect to dipole field.
          Differentiating once with respect to nuclear coordinates.
          Store integrals in memory, NReq=   353689553.
          There are  69 degrees of freedom in the 1st order CPHF.
    66 vectors were produced by pass  0.
 AX will form  66 AO Fock derivatives at one time.
    66 vectors were produced by pass  1.
    66 vectors were produced by pass  2.
    66 vectors were produced by pass  3.
    66 vectors were produced by pass  4.
    31 vectors were produced by pass  5.
     3 vectors were produced by pass  6.
     1 vectors were produced by pass  7.
 Inv2:  IOpt= 1 Iter= 1 AM= 2.40D-15 Conv= 1.00D-12.
 Inverted reduced A of dimension  365 with in-core refinement.
 Isotropic polarizability for W=    0.000000       83.34 Bohr**3.
 End of Minotr Frequency-dependent properties file   721 does not exist.
 ***** Axes restored to original set *****
 -------------------------------------------------------------------
 Center     Atomic                   Forces (Hartrees/Bohr)
 Number     Number              X              Y              Z
 -------------------------------------------------------------------
    1          7          -0.000001509    0.000001142   -0.000000030
    2          6          -0.000000911    0.000002025    0.000000587
    3          1          -0.000001277    0.000002050    0.000000200
    4          6          -0.000000900    0.000001336    0.000000612
    5          1          -0.000003811    0.000003290    0.000001462
    6          1          -0.000001253   -0.000001322    0.000003240
    7          1           0.000000219    0.000000845   -0.000000950
    8          6           0.000001008   -0.000001637   -0.000001231
    9          1           0.000000838   -0.000002825    0.000002105
   10          6          -0.000000028   -0.000001822    0.000002348
   11          1          -0.000000187   -0.000001116    0.000001268
   12          1           0.000000168   -0.000003285    0.000003338
   13          1          -0.000001994   -0.000000703    0.000003206
   14          6          -0.000002956    0.000004458   -0.000001524
   15          1          -0.000002382    0.000005480   -0.000001025
   16          1           0.000000314    0.000003145   -0.000003720
   17          1          -0.000000885    0.000004812   -0.000003185
   18          6           0.000002874   -0.000002687   -0.000001279
   19          1           0.000003385   -0.000005530    0.000000203
   20          1           0.000003042   -0.000003376   -0.000001709
   21          1           0.000003574   -0.000004176   -0.000001585
   22          1           0.000002672   -0.000000103   -0.000002330
 -------------------------------------------------------------------
 Cartesian Forces:  Max     0.000005530 RMS     0.000002403

 GradGradGradGradGradGradGradGradGradGradGradGradGradGradGradGradGradGrad
 Berny optimization.
 Internal  Forces:  Max     0.000000981 RMS     0.000000375
 Search for a local minimum.
 Step number  15 out of a maximum of 118
 All quantities printed in internal units (Hartrees-Bohrs-Radians)
 Second derivative matrix not updated -- analytic derivatives used.
 Trust test=-5.12D+01 RLast= 3.63D-03 DXMaxT set to 5.00D-02
     Eigenvalues ---    0.00084   0.00204   0.00273   0.00297   0.00306
     Eigenvalues ---    0.00496   0.01822   0.03985   0.04176   0.04397
     Eigenvalues ---    0.04425   0.04489   0.04526   0.04601   0.04616
     Eigenvalues ---    0.04639   0.04653   0.04769   0.05159   0.05476
     Eigenvalues ---    0.05495   0.11054   0.11879   0.11988   0.12285
     Eigenvalues ---    0.12416   0.12604   0.12948   0.12985   0.13620
     Eigenvalues ---    0.14156   0.14288   0.14774   0.14966   0.18512
     Eigenvalues ---    0.18897   0.19355   0.19989   0.24128   0.26436
     Eigenvalues ---    0.27916   0.28540   0.28964   0.29741   0.32376
     Eigenvalues ---    0.32824   0.33018   0.33029   0.33266   0.33345
     Eigenvalues ---    0.33414   0.33508   0.33617   0.34080   0.34206
     Eigenvalues ---    0.34271   0.34413   0.34523   0.36992   0.43655
     Eigenvalues --- 1000.000001000.000001000.000001000.000001000.00000
     Eigenvalues --- 1000.000001000.000001000.000001000.000001000.00000
     Eigenvalues --- 1000.000001000.000001000.000001000.000001000.00000
     Eigenvalues --- 1000.000001000.000001000.000001000.000001000.00000
     Eigenvalues --- 1000.000001000.000001000.000001000.000001000.00000
     Eigenvalues --- 1000.000001000.000001000.000001000.000001000.00000
     Eigenvalues --- 1000.000001000.000001000.000001000.000001000.00000
     Eigenvalues --- 1000.000001000.000001000.000001000.000001000.00000
     Eigenvalues --- 1000.000001000.000001000.000001000.000001000.00000
     Eigenvalues --- 1000.000001000.000001000.00000
 RFO step:  Lambda= 0.00000000D+00.
 Quintic linear search produced a step of -0.94075.
 Iteration  1 RMS(Cart)=  0.00097536 RMS(Int)=  0.00000032
 Iteration  2 RMS(Cart)=  0.00000043 RMS(Int)=  0.00000000
 Variable       Old X    -DE/DX   Delta X   Delta X   Delta X     New X
                                 (Linear)    (Quad)   (Total)
    R1        2.77510   0.00000   0.00000   0.00000   0.00000   2.77510
    R2        2.77365   0.00000  -0.00001   0.00001   0.00000   2.77365
    R3        1.91865   0.00000   0.00000   0.00000   0.00000   1.91864
    R4        2.06689   0.00000  -0.00001   0.00000  -0.00001   2.06688
    R5        2.90534   0.00000   0.00000   0.00000   0.00000   2.90534
    R6        2.88930   0.00000   0.00000   0.00000   0.00000   2.88930
    R7        2.06547   0.00000   0.00000   0.00000   0.00000   2.06547
    R8        2.06253   0.00000   0.00000   0.00000   0.00000   2.06253
    R9        2.06839   0.00000   0.00000   0.00000   0.00000   2.06839
   R10        2.08374   0.00000   0.00000   0.00000   0.00000   2.08374
   R11        2.89101   0.00000   0.00001   0.00000   0.00001   2.89102
   R12        2.88853   0.00000   0.00000   0.00000   0.00000   2.88853
   R13        2.06443   0.00000   0.00000   0.00000   0.00000   2.06442
   R14        2.06426   0.00000   0.00000   0.00000   0.00000   2.06426
   R15        2.06234   0.00000   0.00000   0.00000   0.00000   2.06234
   R16        2.06371   0.00000   0.00000   0.00000   0.00001   2.06372
   R17        2.06895   0.00000   0.00000  -0.00001   0.00000   2.06895
   R18        2.06071   0.00000   0.00000   0.00000   0.00000   2.06071
   R19        2.06291   0.00000   0.00000   0.00000   0.00000   2.06291
   R20        2.06447   0.00000   0.00001   0.00000   0.00000   2.06447
   R21        2.06696   0.00000   0.00000   0.00000   0.00000   2.06696
    A1        2.06968   0.00000  -0.00004   0.00001  -0.00003   2.06965
    A2        1.90277   0.00000   0.00000   0.00000   0.00001   1.90278
    A3        1.90895   0.00000   0.00006  -0.00003   0.00003   1.90898
    A4        1.86629   0.00000  -0.00001   0.00000  -0.00001   1.86628
    A5        2.00171   0.00000  -0.00004   0.00001  -0.00003   2.00168
    A6        1.89048   0.00000   0.00004  -0.00001   0.00003   1.89051
    A7        1.88634   0.00000   0.00001   0.00000   0.00001   1.88635
    A8        1.87810   0.00000   0.00001   0.00001   0.00002   1.87812
    A9        1.93600   0.00000   0.00000  -0.00001  -0.00001   1.93599
   A10        1.93550   0.00000   0.00003   0.00000   0.00002   1.93553
   A11        1.95381   0.00000  -0.00001   0.00000  -0.00001   1.95380
   A12        1.93002   0.00000  -0.00002   0.00001  -0.00001   1.93000
   A13        1.87620   0.00000   0.00000   0.00000   0.00000   1.87620
   A14        1.88147   0.00000   0.00000  -0.00001  -0.00001   1.88146
   A15        1.88412   0.00000   0.00001   0.00000   0.00001   1.88413
   A16        1.95144   0.00000   0.00000   0.00000   0.00000   1.95144
   A17        1.93429   0.00000  -0.00001   0.00001   0.00000   1.93429
   A18        1.88989   0.00000   0.00003  -0.00001   0.00002   1.88991
   A19        1.88017   0.00000   0.00001   0.00000   0.00000   1.88017
   A20        1.87426   0.00000  -0.00001   0.00000   0.00000   1.87425
   A21        1.93330   0.00000  -0.00002   0.00001  -0.00001   1.93328
   A22        1.92290   0.00000  -0.00001   0.00001   0.00000   1.92290
   A23        1.92594   0.00000   0.00001   0.00000   0.00001   1.92595
   A24        1.95550   0.00000   0.00000   0.00000   0.00000   1.95550
   A25        1.89684   0.00000   0.00001   0.00000   0.00001   1.89684
   A26        1.88666   0.00000  -0.00001   0.00000  -0.00001   1.88665
   A27        1.87423   0.00000  -0.00001   0.00000   0.00000   1.87423
   A28        1.93965   0.00000   0.00001   0.00001   0.00001   1.93966
   A29        1.93160   0.00000   0.00000  -0.00002  -0.00002   1.93158
   A30        1.92919   0.00000   0.00001   0.00000   0.00000   1.92920
   A31        1.87728   0.00000   0.00000   0.00001   0.00001   1.87728
   A32        1.89913   0.00000   0.00001   0.00000   0.00001   1.89914
   A33        1.88526   0.00000  -0.00002   0.00001  -0.00001   1.88525
   A34        1.93427   0.00000   0.00000   0.00000   0.00000   1.93428
   A35        1.92752   0.00000   0.00001  -0.00001  -0.00001   1.92751
   A36        1.94037   0.00000   0.00002  -0.00001   0.00001   1.94038
   A37        1.89458   0.00000  -0.00003   0.00001  -0.00002   1.89457
   A38        1.87865   0.00000   0.00000   0.00001   0.00000   1.87865
   A39        1.88673   0.00000   0.00000   0.00001   0.00001   1.88674
    D1       -1.01022   0.00000   0.00088   0.00003   0.00090  -1.00932
    D2        1.08068   0.00000   0.00086   0.00003   0.00089   1.08157
    D3       -3.02977   0.00000   0.00085   0.00002   0.00087  -3.02890
    D4        3.07428   0.00000   0.00082   0.00006   0.00088   3.07516
    D5       -1.11800   0.00000   0.00080   0.00007   0.00087  -1.11714
    D6        1.05473   0.00000   0.00080   0.00005   0.00085   1.05558
    D7       -0.89369   0.00000   0.00085  -0.00022   0.00064  -0.89305
    D8        1.20427   0.00000   0.00086  -0.00022   0.00064   1.20491
    D9       -2.95511   0.00000   0.00084  -0.00021   0.00063  -2.95448
   D10        1.30203   0.00000   0.00088  -0.00024   0.00065   1.30267
   D11       -2.88320   0.00000   0.00089  -0.00024   0.00065  -2.88256
   D12       -0.75940   0.00000   0.00087  -0.00023   0.00064  -0.75876
   D13       -3.11307   0.00000   0.00042   0.00041   0.00083  -3.11224
   D14       -1.01775   0.00000   0.00043   0.00041   0.00085  -1.01690
   D15        1.08389   0.00000   0.00042   0.00042   0.00084   1.08473
   D16       -1.03336   0.00000   0.00039   0.00042   0.00081  -1.03255
   D17        1.06197   0.00000   0.00040   0.00042   0.00082   1.06280
   D18       -3.11958   0.00000   0.00039   0.00043   0.00082  -3.11876
   D19        1.02163   0.00000   0.00040   0.00043   0.00083   1.02246
   D20        3.11696   0.00000   0.00041   0.00043   0.00084   3.11780
   D21       -1.06459   0.00000   0.00040   0.00044   0.00084  -1.06375
   D22        3.08414   0.00000   0.00024   0.00010   0.00034   3.08448
   D23       -1.11435   0.00000   0.00023   0.00010   0.00034  -1.11402
   D24        0.97354   0.00000   0.00022   0.00010   0.00032   0.97386
   D25        1.07229   0.00000   0.00022   0.00010   0.00032   1.07261
   D26       -3.12620   0.00000   0.00022   0.00010   0.00032  -3.12588
   D27       -1.03831   0.00000   0.00021   0.00009   0.00030  -1.03800
   D28       -0.98770   0.00000   0.00021   0.00010   0.00031  -0.98739
   D29        1.09699   0.00000   0.00021   0.00010   0.00031   1.09730
   D30       -3.09830   0.00000   0.00019   0.00009   0.00029  -3.09801
   D31        1.00823   0.00000   0.00028   0.00001   0.00029   1.00853
   D32        3.10287   0.00000   0.00030   0.00001   0.00031   3.10317
   D33       -1.09287   0.00000   0.00030   0.00001   0.00030  -1.09256
   D34       -3.13503   0.00000   0.00028   0.00001   0.00029  -3.13474
   D35       -1.04040   0.00000   0.00029   0.00001   0.00030  -1.04010
   D36        1.04705   0.00000   0.00029   0.00001   0.00030   1.04735
   D37       -1.08990   0.00000   0.00026   0.00002   0.00028  -1.08962
   D38        1.00473   0.00000   0.00028   0.00002   0.00030   1.00502
   D39        3.09218   0.00000   0.00028   0.00002   0.00029   3.09247
   D40        3.13374   0.00000   0.00021   0.00000   0.00021   3.13395
   D41       -1.04924   0.00000   0.00018   0.00001   0.00019  -1.04905
   D42        1.04509   0.00000   0.00020   0.00000   0.00020   1.04529
   D43        1.02373   0.00000   0.00020   0.00001   0.00020   1.02394
   D44        3.12394   0.00000   0.00016   0.00001   0.00018   3.12412
   D45       -1.06491   0.00000   0.00018   0.00001   0.00019  -1.06472
   D46       -1.02503   0.00000   0.00020   0.00001   0.00021  -1.02482
   D47        1.07518   0.00000   0.00017   0.00001   0.00019   1.07536
   D48       -3.11368   0.00000   0.00019   0.00001   0.00020  -3.11348
         Item               Value     Threshold  Converged?
 Maximum Force            0.000001     0.000015     YES
 RMS     Force            0.000000     0.000010     YES
 Maximum Displacement     0.003235     0.000060     NO 
 RMS     Displacement     0.000975     0.000040     NO 
 Predicted change in Energy=-1.046525D-10
 GradGradGradGradGradGradGradGradGradGradGradGradGradGradGradGradGradGrad

                          Input orientation:                          
 ---------------------------------------------------------------------
 Center     Atomic     Atomic              Coordinates (Angstroms)
 Number     Number      Type              X           Y           Z
 ---------------------------------------------------------------------
    1          7             0       -0.086094   -0.326731   -0.041803
    2          6             0        0.596721    0.739803   -0.785322
    3          1             0       -0.138483    1.171365   -1.470531
    4          6             0        1.157947    1.873662    0.088242
    5          1             0        1.625388    2.645817   -0.528142
[truncated: 1,928,619 more chars]
