# Supplementary material for: CO from CO2and fluctuating renewable energy via formic-acid derivatives
Source: Royal Society of Chemistry journal article supplement (doi:10.1039/c6gc01202g), 2016-01-01
Supplement: c6gc01202g6.log [file c6gc01202g6.log]

 Entering Gaussian System, Link 0=/opt/mbfd/GAUSSIAN/LINUX64/g03.e01/g03
 Input=DIPA_geoopt_new_opt_2.com
 Output=DIPA_geoopt_new_opt_2.log
 Initial command:
 /opt/mbfd/GAUSSIAN/LINUX64/g03.e01/l1.exe /gaussianscratch/Gau-15891.inp -scrdir=/gaussianscratch/
 Entering Link 1 = /opt/mbfd/GAUSSIAN/LINUX64/g03.e01/l1.exe PID=     15895.
  
 Copyright (c) 1988,1990,1992,1993,1995,1998,2003,2004,2007, Gaussian, Inc.
                  All Rights Reserved.
  
 This is the Gaussian(R) 03 program.  It is based on the
 the Gaussian(R) 98 system (copyright 1998, Gaussian, Inc.),
 the Gaussian(R) 94 system (copyright 1995, Gaussian, Inc.),
 the Gaussian 92(TM) system (copyright 1992, Gaussian, Inc.),
 the Gaussian 90(TM) system (copyright 1990, Gaussian, Inc.),
 the Gaussian 88(TM) system (copyright 1988, Gaussian, Inc.),
 the Gaussian 86(TM) system (copyright 1986, Carnegie Mellon
 University), and the Gaussian 82(TM) system (copyright 1983,
 Carnegie Mellon University). Gaussian is a federally registered
 trademark of Gaussian, Inc.
  
 This software contains proprietary and confidential information,
 including trade secrets, belonging to Gaussian, Inc.
  
 This software is provided under written license and may be
 used, copied, transmitted, or stored only in accord with that
 written license.
  
 The following legend is applicable only to US Government
 contracts under FAR:
  
                    RESTRICTED RIGHTS LEGEND
  
 Use, reproduction and disclosure by the US Government is
 subject to restrictions as set forth in subparagraphs (a)
 and (c) of the Commercial Computer Software - Restricted
 Rights clause in FAR 52.227-19.
  
 Gaussian, Inc.
 340 Quinnipiac St., Bldg. 40, Wallingford CT 06492
  
  
 ---------------------------------------------------------------
 Warning -- This program may not be used in any manner that
 competes with the business of Gaussian, Inc. or will provide
 assistance to any competitor of Gaussian, Inc.  The licensee
 of this program is prohibited from giving any competitor of
 Gaussian, Inc. access to this program.  By using this program,
 the user acknowledges that Gaussian, Inc. is engaged in the
 business of creating and licensing software in the field of
 computational chemistry and represents and warrants to the
 licensee that it is not a competitor of Gaussian, Inc. and that
 it will not use this program in any manner prohibited above.
 ---------------------------------------------------------------
  

 Cite this work as:
 Gaussian 03, Revision E.01,
 M. J. Frisch, G. W. Trucks, H. B. Schlegel, G. E. Scuseria, 
 M. A. Robb, J. R. Cheeseman, J. A. Montgomery, Jr., T. Vreven, 
 K. N. Kudin, J. C. Burant, J. M. Millam, S. S. Iyengar, J. Tomasi, 
 V. Barone, B. Mennucci, M. Cossi, G. Scalmani, N. Rega, 
 G. A. Petersson, H. Nakatsuji, M. Hada, M. Ehara, K. Toyota, 
 R. Fukuda, J. Hasegawa, M. Ishida, T. Nakajima, Y. Honda, O. Kitao, 
 H. Nakai, M. Klene, X. Li, J. E. Knox, H. P. Hratchian, J. B. Cross, 
 V. Bakken, C. Adamo, J. Jaramillo, R. Gomperts, R. E. Stratmann, 
 O. Yazyev, A. J. Austin, R. Cammi, C. Pomelli, J. W. Ochterski, 
 P. Y. Ayala, K. Morokuma, G. A. Voth, P. Salvador, J. J. Dannenberg, 
 V. G. Zakrzewski, S. Dapprich, A. D. Daniels, M. C. Strain, 
 O. Farkas, D. K. Malick, A. D. Rabuck, K. Raghavachari, 
 J. B. Foresman, J. V. Ortiz, Q. Cui, A. G. Baboul, S. Clifford, 
 J. Cioslowski, B. B. Stefanov, G. Liu, A. Liashenko, P. Piskorz, 
 I. Komaromi, R. L. Martin, D. J. Fox, T. Keith, M. A. Al-Laham, 
 C. Y. Peng, A. Nanayakkara, M. Challacombe, P. M. W. Gill, 
 B. Johnson, W. Chen, M. W. Wong, C. Gonzalez, and J. A. Pople, 
 Gaussian, Inc., Wallingford CT, 2004.
 
 ******************************************
 Gaussian 03:  AM64L-G03RevE.01 11-Sep-2007
                13-Nov-2014 
 ******************************************
 %chk=DIPF_geoopt.chk
 %mem=3000MB
 %nprocshared=3
 Will use up to    3 processors via shared memory.
 Default route: MaxDisk=200000000
 --------------------------------------------------
 # opt=(calcall,tight) b3lyp geom=connectivity tzvp
 --------------------------------------------------
 1/7=10,10=4,14=-1,18=20,26=3,38=1,57=2/1,3;
 2/9=110,17=6,18=5,40=1/2;
 3/5=19,7=101,11=2,16=1,25=1,30=1,74=-5/1,2,3;
 4//1;
 5/5=2,38=5/2;
 8/6=4,10=90,11=11/1;
 11/6=1,8=1,9=11,15=111,16=1/1,2,10;
 10/6=1/2;
 6/7=2,8=2,9=2,10=2,18=1,28=1/1;
 7/10=1,25=1/1,2,3,16;
 1/10=4,14=-1,18=20/3(3);
 2/9=110/2;
 7/8=1,9=1,25=1,44=-1/16;
 99//99;
 2/9=110/2;
 3/5=19,7=101,11=2,16=1,25=1,30=1,74=-5/1,2,3;
 4/5=5,16=3/1;
 5/5=2,38=5/2;
 8/6=4,10=90,11=11/1;
 11/6=1,8=1,9=11,15=111,16=1/1,2,10;
 10/6=1/2;
 7/10=1,25=1/1,2,3,16;
 1/10=4,14=-1,18=20/3(-8);
 2/9=110/2;
 6/7=2,8=2,9=2,10=2,18=1,19=2,28=1/1;
 7/8=1,9=1,25=1,44=-1/16;
 99//99;
 -------------------
 Title Card Required
 -------------------
 Symbolic Z-matrix:
 Charge =  0 Multiplicity = 1
 N                    -0.05774   0.39008  -0.02054 
 C                     0.6675   -0.90216   0.0291 
 H                    -0.11231  -1.66457   0.05656 
 C                     1.50179  -1.14052  -1.2342 
 H                     1.94247  -2.13958  -1.20033 
 H                     0.88175  -1.07471  -2.13014 
 H                     2.30498  -0.40976  -1.31246 
 C                    -1.53154   0.39938  -0.01903 
 H                    -1.80791   1.45568  -0.06823 
 C                    -2.11715  -0.28453  -1.25889 
 H                    -1.8996   -1.35463  -1.27445 
 H                    -3.20325  -0.17139  -1.27004 
 H                    -1.71807   0.15875  -2.17236 
 C                     0.61837   1.56799  -0.05388 
 H                    -0.06317   2.43829  -0.08418 
 O                     1.82902   1.70754  -0.05357 
 C                     1.49808  -1.04656   1.30917 
 H                     1.93721  -2.04596   1.35104 
 H                     2.30164  -0.3127    1.33534 
 H                     0.87539  -0.91329   2.1957 
 C                    -2.1138   -0.16596   1.28079 
 H                    -3.20091  -0.06235   1.28035 
 H                    -1.8858   -1.22743   1.39965 
 H                    -1.72003   0.36697   2.14748 
 

 GradGradGradGradGradGradGradGradGradGradGradGradGradGradGradGradGradGrad
 Berny optimization.
 Initialization pass.
                           ----------------------------
                           !    Initial Parameters    !
                           ! (Angstroms and Degrees)  !
 --------------------------                            --------------------------
 ! Name  Definition              Value          Derivative Info.                !
 --------------------------------------------------------------------------------
 ! R1    R(1,2)                  1.4827         calculate D2E/DX2 analytically  !
 ! R2    R(1,8)                  1.4738         calculate D2E/DX2 analytically  !
 ! R3    R(1,14)                 1.3586         calculate D2E/DX2 analytically  !
 ! R4    R(2,3)                  1.0909         calculate D2E/DX2 analytically  !
 ! R5    R(2,4)                  1.5326         calculate D2E/DX2 analytically  !
 ! R6    R(2,17)                 1.5327         calculate D2E/DX2 analytically  !
 ! R7    R(4,5)                  1.0925         calculate D2E/DX2 analytically  !
 ! R8    R(4,6)                  1.0916         calculate D2E/DX2 analytically  !
 ! R9    R(4,7)                  1.0887         calculate D2E/DX2 analytically  !
 ! R10   R(8,9)                  1.093          calculate D2E/DX2 analytically  !
 ! R11   R(8,10)                 1.5323         calculate D2E/DX2 analytically  !
 ! R12   R(8,21)                 1.5324         calculate D2E/DX2 analytically  !
 ! R13   R(10,11)                1.0921         calculate D2E/DX2 analytically  !
 ! R14   R(10,12)                1.092          calculate D2E/DX2 analytically  !
 ! R15   R(10,13)                1.091          calculate D2E/DX2 analytically  !
 ! R16   R(14,15)                1.1058         calculate D2E/DX2 analytically  !
 ! R17   R(14,16)                1.2187         calculate D2E/DX2 analytically  !
 ! R18   R(17,18)                1.0924         calculate D2E/DX2 analytically  !
 ! R19   R(17,19)                1.0885         calculate D2E/DX2 analytically  !
 ! R20   R(17,20)                1.0915         calculate D2E/DX2 analytically  !
 ! R21   R(21,22)                1.092          calculate D2E/DX2 analytically  !
 ! R22   R(21,23)                1.0922         calculate D2E/DX2 analytically  !
 ! R23   R(21,24)                1.091          calculate D2E/DX2 analytically  !
 ! A1    A(2,1,8)              119.6433         calculate D2E/DX2 analytically  !
 ! A2    A(2,1,14)             120.8674         calculate D2E/DX2 analytically  !
 ! A3    A(8,1,14)             119.486          calculate D2E/DX2 analytically  !
 ! A4    A(1,2,3)              105.0874         calculate D2E/DX2 analytically  !
 ! A5    A(1,2,4)              111.977          calculate D2E/DX2 analytically  !
 ! A6    A(1,2,17)             112.0324         calculate D2E/DX2 analytically  !
 ! A7    A(3,2,4)              107.5288         calculate D2E/DX2 analytically  !
 ! A8    A(3,2,17)             107.4872         calculate D2E/DX2 analytically  !
 ! A9    A(4,2,17)             112.2574         calculate D2E/DX2 analytically  !
 ! A10   A(2,4,5)              109.6499         calculate D2E/DX2 analytically  !
 ! A11   A(2,4,6)              110.9761         calculate D2E/DX2 analytically  !
 ! A12   A(2,4,7)              110.8838         calculate D2E/DX2 analytically  !
 ! A13   A(5,4,6)              108.0422         calculate D2E/DX2 analytically  !
 ! A14   A(5,4,7)              108.5707         calculate D2E/DX2 analytically  !
 ! A15   A(6,4,7)              108.6385         calculate D2E/DX2 analytically  !
 ! A16   A(1,8,9)              105.0056         calculate D2E/DX2 analytically  !
 ! A17   A(1,8,10)             112.2426         calculate D2E/DX2 analytically  !
 ! A18   A(1,8,21)             112.2412         calculate D2E/DX2 analytically  !
 ! A19   A(9,8,10)             107.3551         calculate D2E/DX2 analytically  !
 ! A20   A(9,8,21)             107.3771         calculate D2E/DX2 analytically  !
 ! A21   A(10,8,21)            112.115          calculate D2E/DX2 analytically  !
 ! A22   A(8,10,11)            111.8843         calculate D2E/DX2 analytically  !
 ! A23   A(8,10,12)            110.0067         calculate D2E/DX2 analytically  !
 ! A24   A(8,10,13)            110.8764         calculate D2E/DX2 analytically  !
 ! A25   A(11,10,12)           107.4274         calculate D2E/DX2 analytically  !
 ! A26   A(11,10,13)           108.2602         calculate D2E/DX2 analytically  !
 ! A27   A(12,10,13)           108.2503         calculate D2E/DX2 analytically  !
 ! A28   A(1,14,15)            112.1057         calculate D2E/DX2 analytically  !
 ! A29   A(1,14,16)            126.4179         calculate D2E/DX2 analytically  !
 ! A30   A(15,14,16)           121.4764         calculate D2E/DX2 analytically  !
 ! A31   A(2,17,18)            109.6345         calculate D2E/DX2 analytically  !
 ! A32   A(2,17,19)            110.891          calculate D2E/DX2 analytically  !
 ! A33   A(2,17,20)            110.9569         calculate D2E/DX2 analytically  !
 ! A34   A(18,17,19)           108.6088         calculate D2E/DX2 analytically  !
 ! A35   A(18,17,20)           108.0517         calculate D2E/DX2 analytically  !
 ! A36   A(19,17,20)           108.6196         calculate D2E/DX2 analytically  !
 ! A37   A(8,21,22)            110.0544         calculate D2E/DX2 analytically  !
 ! A38   A(8,21,23)            111.8116         calculate D2E/DX2 analytically  !
 ! A39   A(8,21,24)            110.8851         calculate D2E/DX2 analytically  !
 ! A40   A(22,21,23)           107.4614         calculate D2E/DX2 analytically  !
 ! A41   A(22,21,24)           108.2568         calculate D2E/DX2 analytically  !
 ! A42   A(23,21,24)           108.2379         calculate D2E/DX2 analytically  !
 ! D1    D(8,1,2,3)              0.1826         calculate D2E/DX2 analytically  !
 ! D2    D(8,1,2,4)            116.6171         calculate D2E/DX2 analytically  !
 ! D3    D(8,1,2,17)          -116.2302         calculate D2E/DX2 analytically  !
 ! D4    D(14,1,2,3)           179.5145         calculate D2E/DX2 analytically  !
 ! D5    D(14,1,2,4)           -64.0509         calculate D2E/DX2 analytically  !
 ! D6    D(14,1,2,17)           63.1017         calculate D2E/DX2 analytically  !
 ! D7    D(2,1,8,9)           -179.554          calculate D2E/DX2 analytically  !
 ! D8    D(2,1,8,10)           -63.241          calculate D2E/DX2 analytically  !
 ! D9    D(2,1,8,21)            64.1075         calculate D2E/DX2 analytically  !
 ! D10   D(14,1,8,9)             1.1048         calculate D2E/DX2 analytically  !
 ! D11   D(14,1,8,10)          117.4178         calculate D2E/DX2 analytically  !
 ! D12   D(14,1,8,21)         -115.2337         calculate D2E/DX2 analytically  !
 ! D13   D(2,1,14,15)         -179.7288         calculate D2E/DX2 analytically  !
 ! D14   D(2,1,14,16)            0.3386         calculate D2E/DX2 analytically  !
 ! D15   D(8,1,14,15)           -0.3959         calculate D2E/DX2 analytically  !
 ! D16   D(8,1,14,16)          179.6716         calculate D2E/DX2 analytically  !
 ! D17   D(1,2,4,5)           -174.6688         calculate D2E/DX2 analytically  !
 ! D18   D(1,2,4,6)            -55.3871         calculate D2E/DX2 analytically  !
 ! D19   D(1,2,4,7)             65.4516         calculate D2E/DX2 analytically  !
 ! D20   D(3,2,4,5)            -59.7191         calculate D2E/DX2 analytically  !
 ! D21   D(3,2,4,6)             59.5626         calculate D2E/DX2 analytically  !
 ! D22   D(3,2,4,7)           -179.5987         calculate D2E/DX2 analytically  !
 ! D23   D(17,2,4,5)            58.2997         calculate D2E/DX2 analytically  !
 ! D24   D(17,2,4,6)           177.5814         calculate D2E/DX2 analytically  !
 ! D25   D(17,2,4,7)           -61.5799         calculate D2E/DX2 analytically  !
 ! D26   D(1,2,17,18)          174.6014         calculate D2E/DX2 analytically  !
 ! D27   D(1,2,17,19)          -65.4769         calculate D2E/DX2 analytically  !
 ! D28   D(1,2,17,20)           55.3298         calculate D2E/DX2 analytically  !
 ! D29   D(3,2,17,18)           59.6467         calculate D2E/DX2 analytically  !
 ! D30   D(3,2,17,19)          179.5684         calculate D2E/DX2 analytically  !
 ! D31   D(3,2,17,20)          -59.6249         calculate D2E/DX2 analytically  !
 ! D32   D(4,2,17,18)          -58.3967         calculate D2E/DX2 analytically  !
 ! D33   D(4,2,17,19)           61.5249         calculate D2E/DX2 analytically  !
 ! D34   D(4,2,17,20)         -177.6683         calculate D2E/DX2 analytically  !
 ! D35   D(1,8,10,11)           66.2078         calculate D2E/DX2 analytically  !
 ! D36   D(1,8,10,12)         -174.4689         calculate D2E/DX2 analytically  !
 ! D37   D(1,8,10,13)          -54.762          calculate D2E/DX2 analytically  !
 ! D38   D(9,8,10,11)         -178.9021         calculate D2E/DX2 analytically  !
 ! D39   D(9,8,10,12)          -59.5788         calculate D2E/DX2 analytically  !
 ! D40   D(9,8,10,13)           60.1281         calculate D2E/DX2 analytically  !
 ! D41   D(21,8,10,11)         -61.208          calculate D2E/DX2 analytically  !
 ! D42   D(21,8,10,12)          58.1152         calculate D2E/DX2 analytically  !
 ! D43   D(21,8,10,13)         177.8222         calculate D2E/DX2 analytically  !
 ! D44   D(1,8,21,22)          175.0792         calculate D2E/DX2 analytically  !
 ! D45   D(1,8,21,23)          -65.5699         calculate D2E/DX2 analytically  !
 ! D46   D(1,8,21,24)           55.3278         calculate D2E/DX2 analytically  !
 ! D47   D(9,8,21,22)           60.1768         calculate D2E/DX2 analytically  !
 ! D48   D(9,8,21,23)          179.5276         calculate D2E/DX2 analytically  !
 ! D49   D(9,8,21,24)          -59.5747         calculate D2E/DX2 analytically  !
 ! D50   D(10,8,21,22)         -57.5042         calculate D2E/DX2 analytically  !
 ! D51   D(10,8,21,23)          61.8467         calculate D2E/DX2 analytically  !
 ! D52   D(10,8,21,24)        -177.2556         calculate D2E/DX2 analytically  !
 --------------------------------------------------------------------------------
 Trust Radius=3.00D-01 FncErr=1.00D-07 GrdErr=1.00D-06
 Number of steps in this run= 127 maximum allowed number of steps= 144.
 GradGradGradGradGradGradGradGradGradGradGradGradGradGradGradGradGradGrad

                          Input orientation:                          
 ---------------------------------------------------------------------
 Center     Atomic     Atomic              Coordinates (Angstroms)
 Number     Number      Type              X           Y           Z
 ---------------------------------------------------------------------
    1          7             0       -0.057738    0.390082   -0.020541
    2          6             0        0.667502   -0.902160    0.029097
    3          1             0       -0.112314   -1.664566    0.056561
    4          6             0        1.501793   -1.140522   -1.234196
    5          1             0        1.942470   -2.139575   -1.200330
    6          1             0        0.881751   -1.074710   -2.130140
    7          1             0        2.304982   -0.409758   -1.312458
    8          6             0       -1.531535    0.399383   -0.019029
    9          1             0       -1.807907    1.455676   -0.068231
   10          6             0       -2.117154   -0.284532   -1.258888
   11          1             0       -1.899598   -1.354628   -1.274446
   12          1             0       -3.203247   -0.171394   -1.270042
   13          1             0       -1.718074    0.158747   -2.172364
   14          6             0        0.618374    1.567985   -0.053882
   15          1             0       -0.063165    2.438294   -0.084180
   16          8             0        1.829021    1.707535   -0.053566
   17          6             0        1.498084   -1.046555    1.309167
   18          1             0        1.937208   -2.045965    1.351037
   19          1             0        2.301641   -0.312697    1.335341
   20          1             0        0.875392   -0.913294    2.195702
   21          6             0       -2.113795   -0.165961    1.280794
   22          1             0       -3.200912   -0.062354    1.280353
   23          1             0       -1.885803   -1.227430    1.399652
   24          1             0       -1.720033    0.366969    2.147481
 ---------------------------------------------------------------------
                    Distance matrix (angstroms):
                    1          2          3          4          5
     1  N    0.000000
     2  C    1.482675   0.000000
     3  H    2.056818   1.090931   0.000000
     4  C    2.499569   1.532569   2.132139   0.000000
     5  H    3.433933   2.160609   2.455106   1.092451   0.000000
     6  H    2.734714   2.176690   2.473410   1.091558   1.767373
     7  H    2.809135   2.173378   3.048291   1.088693   1.770947
     8  C    1.473827   2.555796   2.505950   3.612342   4.462117
     9  H    2.049599   3.420017   3.553381   4.365070   5.317218
    10  C    2.495957   3.129645   2.766638   3.718885   4.463761
    11  H    2.829972   2.914439   2.249895   3.408361   3.922132
    12  H    3.430850   4.147828   3.680123   4.803946   5.509719
    13  H    2.727742   3.415103   3.297126   3.596638   4.430205
    14  C    1.358563   2.472027   3.315945   3.083761   4.100436
    15  H    2.049208   3.421307   4.105567   4.071800   5.121059
    16  O    2.301441   2.857703   3.892554   3.100386   4.015992
    17  C    2.500526   1.532741   2.131746   2.545101   2.773039
    18  H    3.434437   2.160548   2.453910   2.773597   2.553089
    19  H    2.810513   2.173511   3.047951   2.815594   3.145809
    20  H    2.735188   2.176584   2.473034   3.494025   3.765030
    21  C    2.496002   3.137570   2.783970   4.510812   5.148244
    22  H    3.431700   4.151571   3.688386   5.440665   6.076431
    23  H    2.824025   2.916091   2.267211   4.291913   4.716735
    24  H    2.732047   3.434904   3.329240   4.907997   5.559184
                    6          7          8          9         10
     6  H    0.000000
     7  H    1.770975   0.000000
     8  C    3.528978   4.128744   0.000000
     9  H    4.229490   4.684421   1.092958   0.000000
    10  C    3.221318   4.424233   1.532299   2.131108   0.000000
    11  H    2.923434   4.309608   2.188172   3.059603   1.092098
    12  H    4.271177   5.513547   2.164588   2.457373   1.092027
    13  H    2.877897   4.153025   2.174754   2.473352   1.090963
    14  C    3.371061   2.887928   2.447234   2.428921   3.516671
    15  H    4.173729   3.902331   2.513466   2.002478   3.607297
    16  O    3.598662   2.508840   3.606354   3.645668   4.581859
    17  C    3.494208   2.815939   3.610185   4.368977   4.499503
    18  H    3.765092   3.147481   4.459707   5.319934   5.133440
    19  H    3.821820   2.649580   4.127301   4.688874   5.124116
    20  H    4.328857   3.821579   3.524408   4.235269   4.613552
    21  C    4.629643   5.129326   1.532377   2.131465   2.542451
    22  H    5.415207   6.095755   2.165275   2.462429   2.769772
    23  H    4.487996   5.058340   2.187392   3.059380   2.830268
    24  H    5.210159   5.364255   2.174936   2.470300   3.490775
                   11         12         13         14         15
    11  H    0.000000
    12  H    1.760558   0.000000
    13  H    1.769043   1.768874   0.000000
    14  C    4.046187   4.371415   3.454404   0.000000
    15  H    4.378981   4.251689   3.506504   1.105826   0.000000
    16  O    4.976946   5.507623   4.412475   1.218663   2.028624
    17  C    4.279510   5.433299   4.890550   3.076948   4.064860
    18  H    4.700233   6.066988   5.534997   4.095578   5.115654
    19  H    5.054406   6.091944   5.355778   2.881023   3.895549
    20  H    4.465117   5.403433   5.191853   3.359082   4.160756
    21  C    2.826316   2.773752   3.490893   3.500382   3.584743
    22  H    3.144899   2.552726   3.764166   4.361781   4.238000
    23  H    2.677157   3.158819   3.835221   4.024675   4.354457
    24  H    3.834804   3.764203   4.324861   3.428788   3.466397
                   16         17         18         19         20
    16  O    0.000000
    17  C    3.090562   0.000000
    18  H    4.009162   1.092430   0.000000
    19  H    2.496752   1.088548   1.771236   0.000000
    20  H    3.582926   1.091535   1.767443   1.770628   0.000000
    21  C    4.564680   3.717784   4.466539   4.418210   3.214157
    22  H    5.496551   4.801046   5.508174   5.508519   4.263592
    23  H    4.952351   3.389925   3.909959   4.286672   2.890774
    24  H    4.386059   3.613461   4.453312   4.158771   2.894414
                   21         22         23         24
    21  C    0.000000
    22  H    1.092043   0.000000
    23  H    1.092165   1.761007   0.000000
    24  H    1.090967   1.768963   1.768852   0.000000
 Stoichiometry    C7H15NO
 Framework group  C1[X(C7H15NO)]
 Deg. of freedom    66
 Full point group                 C1
 Largest Abelian subgroup         C1      NOp   1
 Largest concise Abelian subgroup C1      NOp   1
                         Standard orientation:                         
 ---------------------------------------------------------------------
 Center     Atomic     Atomic              Coordinates (Angstroms)
 Number     Number      Type              X           Y           Z
 ---------------------------------------------------------------------
    1          7             0       -0.057738    0.390082   -0.020541
    2          6             0        0.667502   -0.902160    0.029097
    3          1             0       -0.112314   -1.664566    0.056561
    4          6             0        1.501793   -1.140522   -1.234196
    5          1             0        1.942470   -2.139575   -1.200330
    6          1             0        0.881751   -1.074710   -2.130140
    7          1             0        2.304982   -0.409758   -1.312458
    8          6             0       -1.531535    0.399383   -0.019029
    9          1             0       -1.807907    1.455676   -0.068231
   10          6             0       -2.117154   -0.284532   -1.258888
   11          1             0       -1.899598   -1.354628   -1.274446
   12          1             0       -3.203247   -0.171394   -1.270042
   13          1             0       -1.718074    0.158747   -2.172364
   14          6             0        0.618374    1.567985   -0.053882
   15          1             0       -0.063165    2.438294   -0.084180
   16          8             0        1.829021    1.707535   -0.053566
   17          6             0        1.498084   -1.046555    1.309167
   18          1             0        1.937208   -2.045965    1.351037
   19          1             0        2.301641   -0.312697    1.335341
   20          1             0        0.875392   -0.913294    2.195702
   21          6             0       -2.113795   -0.165961    1.280794
   22          1             0       -3.200912   -0.062354    1.280353
   23          1             0       -1.885803   -1.227430    1.399652
   24          1             0       -1.720033    0.366969    2.147481
 ---------------------------------------------------------------------
 Rotational constants (GHZ):      1.9823115      1.2018169      1.1106312
 Standard basis: TZVP (5D, 7F)
 There are   261 symmetry adapted basis functions of A   symmetry.
 Integral buffers will be    131072 words long.
 Raffenetti 2 integral format.
 Two-electron integral symmetry is turned on.
   261 basis functions,   435 primitive gaussians,   270 cartesian basis functions
    36 alpha electrons       36 beta electrons
       nuclear repulsion energy       498.0328109048 Hartrees.
 NAtoms=   24 NActive=   24 NUniq=   24 SFac= 7.50D-01 NAtFMM=   80 NAOKFM=F Big=F
 One-electron integrals computed using PRISM.
 NBasis=   261 RedAO= T  NBF=   261
 NBsUse=   261 1.00D-06 NBFU=   261
 Harris functional with IExCor=  402 diagonalized for initial guess.
 ExpMin= 9.52D-02 ExpMax= 2.70D+04 ExpMxC= 9.22D+02 IAcc=2 IRadAn=         4 AccDes= 0.00D+00
 HarFok:  IExCor= 402 AccDes= 0.00D+00 IRadAn=         4 IDoV=1
 ScaDFX=  1.000000  1.000000  1.000000  1.000000
 Initial guess orbital symmetries:
       Occupied  (A) (A) (A) (A) (A) (A) (A) (A) (A) (A) (A) (A)
                 (A) (A) (A) (A) (A) (A) (A) (A) (A) (A) (A) (A)
                 (A) (A) (A) (A) (A) (A) (A) (A) (A) (A) (A) (A)
       Virtual   (A) (A) (A) (A) (A) (A) (A) (A) (A) (A) (A) (A)
                 (A) (A) (A) (A) (A) (A) (A) (A) (A) (A) (A) (A)
                 (A) (A) (A) (A) (A) (A) (A) (A) (A) (A) (A) (A)
                 (A) (A) (A) (A) (A) (A) (A) (A) (A) (A) (A) (A)
                 (A) (A) (A) (A) (A) (A) (A) (A) (A) (A) (A) (A)
                 (A) (A) (A) (A) (A) (A) (A) (A) (A) (A) (A) (A)
                 (A) (A) (A) (A) (A) (A) (A) (A) (A) (A) (A) (A)
                 (A) (A) (A) (A) (A) (A) (A) (A) (A) (A) (A) (A)
                 (A) (A) (A) (A) (A) (A) (A) (A) (A) (A) (A) (A)
                 (A) (A) (A) (A) (A) (A) (A) (A) (A) (A) (A) (A)
                 (A) (A) (A) (A) (A) (A) (A) (A) (A) (A) (A) (A)
                 (A) (A) (A) (A) (A) (A) (A) (A) (A) (A) (A) (A)
                 (A) (A) (A) (A) (A) (A) (A) (A) (A) (A) (A) (A)
                 (A) (A) (A) (A) (A) (A) (A) (A) (A) (A) (A) (A)
                 (A) (A) (A) (A) (A) (A) (A) (A) (A) (A) (A) (A)
                 (A) (A) (A) (A) (A) (A) (A) (A) (A) (A) (A) (A)
                 (A) (A) (A) (A) (A) (A) (A) (A) (A) (A) (A) (A)
                 (A) (A) (A) (A) (A) (A) (A) (A) (A) (A) (A) (A)
                 (A) (A) (A) (A) (A) (A) (A) (A) (A)
 The electronic state of the initial guess is 1-A.
 Requested convergence on RMS density matrix=1.00D-08 within 128 cycles.
 Requested convergence on MAX density matrix=1.00D-06.
 Requested convergence on             energy=1.00D-06.
 No special actions if energy rises.
 Integral accuracy reduced to 1.0D-05 until final iterations.
 Initial convergence to 1.0D-05 achieved.  Increase integral accuracy.
 SCF Done:  E(RB+HF-LYP) =  -405.915393922     A.U. after   15 cycles
             Convg  =    0.4877D-08             -V/T =  2.0052
             S**2   =   0.0000
 Range of M.O.s used for correlation:     1   261
 NBasis=   261 NAE=    36 NBE=    36 NFC=     0 NFV=     0
 NROrb=    261 NOA=    36 NOB=    36 NVA=   225 NVB=   225

 **** Warning!!: The largest alpha MO coefficient is  0.20207836D+02

 Symmetrizing basis deriv contribution to polar:
 IMax=3 JMax=2 DiffMx= 0.00D+00
 G2DrvN: will do   25 centers at a time, making    1 passes doing MaxLOS=2.
 FoFDir/FoFCou used for L=0 through L=2.
 DoAtom=TTTTTTTTTTTTTTTTTTTTTTTT
          Differentiating once with respect to electric field.
                with respect to dipole field.
          Differentiating once with respect to nuclear coordinates.
 Integrals replicated using symmetry in FoFDir.
 MinBra= 0 MaxBra= 2 Meth= 1.
 IRaf=       0 NMat=  75 IRICut=      75 DoRegI=T DoRafI=T ISym2E= 2 JSym2E=2.
          There are  75 degrees of freedom in the 1st order CPHF.
    72 vectors were produced by pass  0.
 AX will form  72 AO Fock derivatives at one time.
    72 vectors were produced by pass  1.
    72 vectors were produced by pass  2.
    72 vectors were produced by pass  3.
    72 vectors were produced by pass  4.
    43 vectors were produced by pass  5.
     6 vectors were produced by pass  6.
     2 vectors were produced by pass  7.
 Inv2:  IOpt= 1 Iter= 1 AM= 3.54D-15 Conv= 1.00D-12.
 Inverted reduced A of dimension  411 with in-core refinement.
 Isotropic polarizability for W=    0.000000       94.27 Bohr**3.
 End of Minotr Frequency-dependent properties file   721 does not exist.

 **********************************************************************

            Population analysis using the SCF density.

 **********************************************************************

 Orbital symmetries:
       Occupied  (A) (A) (A) (A) (A) (A) (A) (A) (A) (A) (A) (A)
                 (A) (A) (A) (A) (A) (A) (A) (A) (A) (A) (A) (A)
                 (A) (A) (A) (A) (A) (A) (A) (A) (A) (A) (A) (A)
       Virtual   (A) (A) (A) (A) (A) (A) (A) (A) (A) (A) (A) (A)
                 (A) (A) (A) (A) (A) (A) (A) (A) (A) (A) (A) (A)
                 (A) (A) (A) (A) (A) (A) (A) (A) (A) (A) (A) (A)
                 (A) (A) (A) (A) (A) (A) (A) (A) (A) (A) (A) (A)
                 (A) (A) (A) (A) (A) (A) (A) (A) (A) (A) (A) (A)
                 (A) (A) (A) (A) (A) (A) (A) (A) (A) (A) (A) (A)
                 (A) (A) (A) (A) (A) (A) (A) (A) (A) (A) (A) (A)
                 (A) (A) (A) (A) (A) (A) (A) (A) (A) (A) (A) (A)
                 (A) (A) (A) (A) (A) (A) (A) (A) (A) (A) (A) (A)
                 (A) (A) (A) (A) (A) (A) (A) (A) (A) (A) (A) (A)
                 (A) (A) (A) (A) (A) (A) (A) (A) (A) (A) (A) (A)
                 (A) (A) (A) (A) (A) (A) (A) (A) (A) (A) (A) (A)
                 (A) (A) (A) (A) (A) (A) (A) (A) (A) (A) (A) (A)
                 (A) (A) (A) (A) (A) (A) (A) (A) (A) (A) (A) (A)
                 (A) (A) (A) (A) (A) (A) (A) (A) (A) (A) (A) (A)
                 (A) (A) (A) (A) (A) (A) (A) (A) (A) (A) (A) (A)
                 (A) (A) (A) (A) (A) (A) (A) (A) (A) (A) (A) (A)
                 (A) (A) (A) (A) (A) (A) (A) (A) (A) (A) (A) (A)
                 (A) (A) (A) (A) (A) (A) (A) (A) (A)
 The electronic state is 1-A.
 Alpha  occ. eigenvalues --  -19.08816 -14.34713 -10.26248 -10.22936 -10.21877
 Alpha  occ. eigenvalues --  -10.17704 -10.17695 -10.15935 -10.15922  -1.03491
 Alpha  occ. eigenvalues --   -0.94438  -0.80580  -0.77380  -0.70785  -0.68929
 Alpha  occ. eigenvalues --   -0.64623  -0.62063  -0.54982  -0.51955  -0.47016
 Alpha  occ. eigenvalues --   -0.45947  -0.45893  -0.44269  -0.42529  -0.41922
 Alpha  occ. eigenvalues --   -0.40869  -0.40253  -0.39694  -0.37788  -0.37188
 Alpha  occ. eigenvalues --   -0.36389  -0.35297  -0.35054  -0.34549  -0.25398
 Alpha  occ. eigenvalues --   -0.24895
 Alpha virt. eigenvalues --    0.01411   0.01853   0.04278   0.05645   0.06591
 Alpha virt. eigenvalues --    0.07082   0.08057   0.09921   0.10258   0.11096
 Alpha virt. eigenvalues --    0.11400   0.11936   0.12603   0.13455   0.13790
 Alpha virt. eigenvalues --    0.14520   0.15724   0.16074   0.16181   0.17203
 Alpha virt. eigenvalues --    0.17457   0.19387   0.19716   0.20956   0.21881
 Alpha virt. eigenvalues --    0.23785   0.25375   0.26141   0.26761   0.29529
 Alpha virt. eigenvalues --    0.29612   0.30419   0.31170   0.32569   0.34186
 Alpha virt. eigenvalues --    0.35757   0.36186   0.37916   0.38688   0.39676
 Alpha virt. eigenvalues --    0.40018   0.40409   0.42070   0.42427   0.43117
 Alpha virt. eigenvalues --    0.43984   0.44379   0.45332   0.45430   0.45749
 Alpha virt. eigenvalues --    0.46318   0.47106   0.47696   0.48706   0.49023
 Alpha virt. eigenvalues --    0.49961   0.51071   0.51672   0.52827   0.54889
 Alpha virt. eigenvalues --    0.55245   0.57681   0.58056   0.59689   0.62403
 Alpha virt. eigenvalues --    0.63038   0.64169   0.67043   0.68733   0.69907
 Alpha virt. eigenvalues --    0.72807   0.74263   0.78612   0.82442   0.93147
 Alpha virt. eigenvalues --    1.10691   1.15699   1.22511   1.23575   1.24343
 Alpha virt. eigenvalues --    1.25822   1.26473   1.27180   1.28107   1.29452
 Alpha virt. eigenvalues --    1.30107   1.32414   1.32704   1.33835   1.34091
 Alpha virt. eigenvalues --    1.36425   1.36700   1.38313   1.39274   1.39459
 Alpha virt. eigenvalues --    1.41914   1.42790   1.42837   1.44321   1.44645
 Alpha virt. eigenvalues --    1.45886   1.47807   1.50896   1.50979   1.51376
 Alpha virt. eigenvalues --    1.54398   1.55161   1.57272   1.59859   1.60528
 Alpha virt. eigenvalues --    1.61249   1.63067   1.63362   1.64083   1.65796
 Alpha virt. eigenvalues --    1.67509   1.70600   1.71079   1.71275   1.76061
 Alpha virt. eigenvalues --    1.76826   1.78461   1.79430   1.79483   1.79705
 Alpha virt. eigenvalues --    1.79944   1.81190   1.81632   1.81789   1.82537
 Alpha virt. eigenvalues --    1.86261   1.87472   1.90740   1.91992   1.92026
 Alpha virt. eigenvalues --    1.95111   1.96850   1.98671   1.99139   2.03802
 Alpha virt. eigenvalues --    2.06446   2.06824   2.09475   2.15585   2.19945
 Alpha virt. eigenvalues --    2.21328   2.22437   2.22702   2.24660   2.28431
 Alpha virt. eigenvalues --    2.29667   2.31313   2.31587   2.33203   2.34841
 Alpha virt. eigenvalues --    2.37292   2.39121   2.40148   2.40977   2.45318
 Alpha virt. eigenvalues --    2.45781   2.47008   2.48795   2.50792   2.53193
 Alpha virt. eigenvalues --    2.54385   2.56813   2.56904   2.59565   2.61508
 Alpha virt. eigenvalues --    2.63542   2.64711   2.65640   2.66318   2.68400
 Alpha virt. eigenvalues --    2.69023   2.69992   2.71833   2.73003   2.74006
 Alpha virt. eigenvalues --    2.74819   2.76151   2.77022   2.79386   2.81435
 Alpha virt. eigenvalues --    2.82603   2.84710   2.84799   2.86921   2.93495
 Alpha virt. eigenvalues --    2.95678   3.06032   3.06770   3.12707   3.15332
 Alpha virt. eigenvalues --    3.17871   3.18931   3.23990   3.27740   3.31880
 Alpha virt. eigenvalues --    3.32497   3.34065   3.34289   3.34940   3.36118
 Alpha virt. eigenvalues --    3.37757   3.40045   3.40870   3.41254   3.43290
 Alpha virt. eigenvalues --    3.43615   3.50295   3.53602   3.77281   3.80167
 Alpha virt. eigenvalues --    4.28984  21.98941  22.06340  22.08046  22.08472
 Alpha virt. eigenvalues --   22.08533  22.16283  22.20130  32.00332  43.58142
          Condensed to atoms (all electrons):
              1          2          3          4          5          6
     1  N    7.389731  -0.040286  -0.075145   0.007234   0.008183   0.001059
     2  C   -0.040286   5.288432   0.471373   0.183686  -0.039065  -0.037234
     3  H   -0.075145   0.471373   0.584170  -0.063454  -0.004148  -0.003858
     4  C    0.007234   0.183686  -0.063454   5.229297   0.394273   0.381584
     5  H    0.008183  -0.039065  -0.004148   0.394273   0.575958  -0.026066
     6  H    0.001059  -0.037234  -0.003858   0.381584  -0.026066   0.581174
     7  H   -0.017886  -0.016858   0.007364   0.402463  -0.024375  -0.022591
     8  C    0.182502   0.014001   0.035668  -0.020859   0.000956  -0.003207
     9  H   -0.072328   0.013365   0.000432  -0.001395   0.000046  -0.000024
    10  C   -0.070208  -0.027019  -0.019177   0.013285  -0.000601   0.000681
    11  H   -0.011272   0.006821   0.002682  -0.005012   0.000365  -0.000762
    12  H    0.011059   0.000411  -0.000102  -0.000086   0.000010   0.000230
    13  H    0.009981  -0.003398   0.000828  -0.000724   0.000052   0.000473
    14  C    0.235024   0.012320   0.009148  -0.029836   0.001783  -0.000070
    15  H   -0.159942   0.028720  -0.000113  -0.006604   0.000121   0.000270
    16  O   -0.163207   0.096486   0.000870  -0.044891   0.000751   0.000163
    17  C    0.006796   0.184653  -0.062887  -0.053039  -0.008226   0.013730
    18  H    0.008144  -0.039003  -0.004113  -0.008236   0.001840  -0.000039
    19  H   -0.017906  -0.017037   0.007364  -0.017340   0.000951   0.000001
    20  H    0.000998  -0.037051  -0.003862   0.013783  -0.000044  -0.000630
    21  C   -0.070001  -0.024905  -0.019192   0.003356   0.000041   0.000700
    22  H    0.011252   0.000255  -0.000075   0.000022  -0.000004  -0.000023
    23  H   -0.011187   0.007265   0.002461   0.000582   0.000027  -0.000067
    24  H    0.009624  -0.003568   0.000847  -0.000089  -0.000009  -0.000021
              7          8          9         10         11         12
     1  N   -0.017886   0.182502  -0.072328  -0.070208  -0.011272   0.011059
     2  C   -0.016858   0.014001   0.013365  -0.027019   0.006821   0.000411
     3  H    0.007364   0.035668   0.000432  -0.019177   0.002682  -0.000102
     4  C    0.402463  -0.020859  -0.001395   0.013285  -0.005012  -0.000086
     5  H   -0.024375   0.000956   0.000046  -0.000601   0.000365   0.000010
     6  H   -0.022591  -0.003207  -0.000024   0.000681  -0.000762   0.000230
     7  H    0.498308   0.001715   0.000084  -0.000632   0.000076  -0.000009
     8  C    0.001715   5.203680   0.479531   0.222726  -0.007428  -0.040172
     9  H    0.000084   0.479531   0.591611  -0.066521   0.009302  -0.005331
    10  C   -0.000632   0.222726  -0.066521   5.245792   0.377137   0.379273
    11  H    0.000076  -0.007428   0.009302   0.377137   0.574868  -0.027755
    12  H   -0.000009  -0.040172  -0.005331   0.379273  -0.027755   0.564185
    13  H    0.000045  -0.044118  -0.004578   0.392702  -0.025150  -0.017767
    14  C    0.001443  -0.039433  -0.014113  -0.003381  -0.001578   0.000661
    15  H    0.001280  -0.010858   0.018057  -0.002943  -0.000092   0.000124
    16  O    0.017080   0.005012   0.000280   0.000043  -0.000017   0.000003
    17  C   -0.017267  -0.021183  -0.001377   0.003378   0.000592   0.000015
    18  H    0.000957   0.000987   0.000047   0.000042   0.000030  -0.000004
    19  H    0.005513   0.001727   0.000081  -0.000405  -0.000007   0.000003
    20  H    0.000005  -0.003241  -0.000025   0.000709  -0.000068  -0.000023
    21  C   -0.000409   0.217777  -0.067712  -0.137248  -0.012393   0.010469
    22  H    0.000003  -0.040645  -0.005236   0.010518  -0.000428  -0.001268
    23  H   -0.000005  -0.007485   0.009288  -0.012186   0.005598  -0.000406
    24  H    0.000016  -0.042823  -0.004544   0.016843  -0.000431  -0.000526
             13         14         15         16         17         18
     1  N    0.009981   0.235024  -0.159942  -0.163207   0.006796   0.008144
     2  C   -0.003398   0.012320   0.028720   0.096486   0.184653  -0.039003
     3  H    0.000828   0.009148  -0.000113   0.000870  -0.062887  -0.004113
     4  C   -0.000724  -0.029836  -0.006604  -0.044891  -0.053039  -0.008236
     5  H    0.000052   0.001783   0.000121   0.000751  -0.008226   0.001840
     6  H    0.000473  -0.000070   0.000270   0.000163   0.013730  -0.000039
     7  H    0.000045   0.001443   0.001280   0.017080  -0.017267   0.000957
     8  C   -0.044118  -0.039433  -0.010858   0.005012  -0.021183   0.000987
     9  H   -0.004578  -0.014113   0.018057   0.000280  -0.001377   0.000047
    10  C    0.392702  -0.003381  -0.002943   0.000043   0.003378   0.000042
    11  H   -0.025150  -0.001578  -0.000092  -0.000017   0.000592   0.000030
    12  H   -0.017767   0.000661   0.000124   0.000003   0.000015  -0.000004
    13  H    0.545428   0.000703   0.000075  -0.000284  -0.000082  -0.000009
    14  C    0.000703   4.631092   0.419505   0.587667  -0.029356   0.001812
    15  H    0.000075   0.419505   0.729030  -0.054597  -0.006673   0.000124
    16  O   -0.000284   0.587667  -0.054597   7.957158  -0.045263   0.000781
    17  C   -0.000082  -0.029356  -0.006673  -0.045263   5.228524   0.394102
    18  H   -0.000009   0.001812   0.000124   0.000781   0.394102   0.575875
    19  H    0.000016   0.001254   0.001293   0.017229   0.402916  -0.024272
    20  H   -0.000022  -0.000088   0.000285   0.000139   0.381254  -0.026072
    21  C    0.016933  -0.003707  -0.003543   0.000078   0.013427  -0.000620
    22  H   -0.000525   0.000646   0.000129   0.000002  -0.000084   0.000010
    23  H   -0.000449  -0.001575  -0.000081  -0.000017  -0.005256   0.000381
    24  H   -0.000591   0.000742   0.000116  -0.000302  -0.000676   0.000047
             19         20         21         22         23         24
     1  N   -0.017906   0.000998  -0.070001   0.011252  -0.011187   0.009624
     2  C   -0.017037  -0.037051  -0.024905   0.000255   0.007265  -0.003568
     3  H    0.007364  -0.003862  -0.019192  -0.000075   0.002461   0.000847
     4  C   -0.017340   0.013783   0.003356   0.000022   0.000582  -0.000089
     5  H    0.000951  -0.000044   0.000041  -0.000004   0.000027  -0.000009
     6  H    0.000001  -0.000630   0.000700  -0.000023  -0.000067  -0.000021
     7  H    0.005513   0.000005  -0.000409   0.000003  -0.000005   0.000016
     8  C    0.001727  -0.003241   0.217777  -0.040645  -0.007485  -0.042823
     9  H    0.000081  -0.000025  -0.067712  -0.005236   0.009288  -0.004544
    10  C   -0.000405   0.000709  -0.137248   0.010518  -0.012186   0.016843
    11  H   -0.000007  -0.000068  -0.012393  -0.000428   0.005598  -0.000431
    12  H    0.000003  -0.000023   0.010469  -0.001268  -0.000406  -0.000526
    13  H    0.000016  -0.000022   0.016933  -0.000525  -0.000449  -0.000591
    14  C    0.001254  -0.000088  -0.003707   0.000646  -0.001575   0.000742
    15  H    0.001293   0.000285  -0.003543   0.000129  -0.000081   0.000116
    16  O    0.017229   0.000139   0.000078   0.000002  -0.000017  -0.000302
    17  C    0.402916   0.381254   0.013427  -0.000084  -0.005256  -0.000676
    18  H   -0.024272  -0.026072  -0.000620   0.000010   0.000381   0.000047
    19  H    0.497386  -0.022557  -0.000663  -0.000009   0.000082   0.000050
    20  H   -0.022557   0.581405   0.000707   0.000239  -0.000764   0.000410
    21  C   -0.000663   0.000707   5.251633   0.379325   0.376584   0.391742
    22  H   -0.000009   0.000239   0.379325   0.565065  -0.027801  -0.017965
    23  H    0.000082  -0.000764   0.376584  -0.027801   0.574448  -0.024825
    24  H    0.000050   0.000410   0.391742  -0.017965  -0.024825   0.545573
 Mulliken atomic charges:
              1
     1  N   -0.172221
     2  C   -0.022363
     3  H    0.132919
     4  C   -0.378001
     5  H    0.117181
     6  H    0.114529
     7  H    0.163681
     8  C   -0.084833
     9  H    0.121060
    10  C   -0.322806
    11  H    0.114923
    12  H    0.127004
    13  H    0.130461
    14  C    0.219336
    15  H    0.046317
    16  O   -0.375162
    17  C   -0.378017
    18  H    0.117189
    19  H    0.164329
    20  H    0.114511
    21  C   -0.322382
    22  H    0.126595
    23  H    0.115389
    24  H    0.130359
 Sum of Mulliken charges=   0.00000
 Atomic charges with hydrogens summed into heavy atoms:
              1
     1  N   -0.172221
     2  C    0.110556
     3  H    0.000000
     4  C    0.017390
     5  H    0.000000
     6  H    0.000000
     7  H    0.000000
     8  C    0.036227
     9  H    0.000000
    10  C    0.049582
    11  H    0.000000
    12  H    0.000000
    13  H    0.000000
    14  C    0.265653
    15  H    0.000000
    16  O   -0.375162
    17  C    0.018013
    18  H    0.000000
    19  H    0.000000
    20  H    0.000000
    21  C    0.049961
    22  H    0.000000
    23  H    0.000000
    24  H    0.000000
 Sum of Mulliken charges=   0.00000
 APT atomic charges:
              1
     1  N   -0.810276
     2  C    0.388575
     3  H   -0.041913
     4  C   -0.002504
     5  H   -0.016517
     6  H   -0.017067
     7  H    0.031284
     8  C    0.434373
     9  H   -0.040752
    10  C   -0.001348
    11  H   -0.004716
    12  H   -0.017303
    13  H   -0.007044
    14  C    1.005827
    15  H   -0.048855
    16  O   -0.815192
    17  C   -0.003368
    18  H   -0.016371
    19  H    0.031950
    20  H   -0.017080
    21  C   -0.001993
    22  H   -0.017531
    23  H   -0.004747
    24  H   -0.007432
 Sum of APT charges=   0.00000
 APT Atomic charges with hydrogens summed into heavy atoms:
              1
     1  N   -0.810276
     2  C    0.346662
     3  H    0.000000
     4  C   -0.004804
     5  H    0.000000
     6  H    0.000000
     7  H    0.000000
     8  C    0.393621
     9  H    0.000000
    10  C   -0.030410
    11  H    0.000000
    12  H    0.000000
    13  H    0.000000
    14  C    0.956972
    15  H    0.000000
    16  O   -0.815192
    17  C   -0.004870
    18  H    0.000000
    19  H    0.000000
    20  H    0.000000
    21  C   -0.031703
    22  H    0.000000
    23  H    0.000000
    24  H    0.000000
 Sum of APT charges=   0.00000
 Electronic spatial extent (au):  <R**2>=  1346.7957
 Charge=     0.0000 electrons
 Dipole moment (field-independent basis, Debye):
    X=    -3.6934    Y=    -1.9475    Z=     0.0591  Tot=     4.1758
 Quadrupole moment (field-independent basis, Debye-Ang):
   XX=   -62.1348   YY=   -59.9009   ZZ=   -58.2362
   XY=    -7.0356   XZ=     0.2302   YZ=     0.0435
 Traceless Quadrupole moment (field-independent basis, Debye-Ang):
   XX=    -2.0442   YY=     0.1897   ZZ=     1.8545
   XY=    -7.0356   XZ=     0.2302   YZ=     0.0435
 Octapole moment (field-independent basis, Debye-Ang**2):
  XXX=   -13.6656  YYY=    -0.2269  ZZZ=    -0.4206  XYY=    -9.5909
  XXY=   -10.1515  XXZ=     0.2628  XZZ=     1.3535  YZZ=     3.6772
  YYZ=     0.2521  XYZ=     0.3382
 Hexadecapole moment (field-independent basis, Debye-Ang**3):
 XXXX=  -956.1376 YYYY=  -467.6190 ZZZZ=  -417.4841 XXXY=   -21.7770
 XXXZ=     0.8260 YYYX=   -18.4897 YYYZ=    -0.8114 ZZZX=    -0.3041
 ZZZY=     0.0394 XXYY=  -261.5854 XXZZ=  -232.6336 YYZZ=  -150.5493
 XXYZ=     0.4709 YYXZ=     0.8254 ZZXY=     3.7014
 N-N= 4.980328109048D+02 E-N=-1.939936186708D+03  KE= 4.038045035525D+02
  Exact polarizability: 105.468   0.530  91.956   0.014  -0.122  85.394
 Approx polarizability: 146.828   7.521 133.248  -0.134  -0.587 114.044
 ***** Axes restored to original set *****
 -------------------------------------------------------------------
 Center     Atomic                   Forces (Hartrees/Bohr)
 Number     Number              X              Y              Z
 -------------------------------------------------------------------
    1          7          -0.000001346   -0.000057320    0.000284516
    2          6           0.000001986    0.000001738   -0.000001295
    3          1          -0.000000886   -0.000000480    0.000000614
    4          6           0.000000418   -0.000000957   -0.000001585
    5          1          -0.000001748    0.000000181   -0.000001747
    6          1          -0.000002517    0.000000726   -0.000001079
    7          1          -0.000001925   -0.000000094   -0.000001872
    8          6           0.000003179    0.000227170    0.000004714
    9          1          -0.000000526    0.000000730    0.000001578
   10          6          -0.000001275   -0.000001542    0.000000244
   11          1          -0.000001543    0.000000121    0.000001919
   12          1          -0.000001804   -0.000000213    0.000003143
   13          1          -0.000001979   -0.000000140    0.000002734
   14          6          -0.000000914   -0.000004542   -0.000215083
   15          1           0.000000260   -0.000001085   -0.000000637
   16          8           0.000001355   -0.000000062   -0.000003394
   17          6          -0.000000677    0.000000011   -0.000001771
   18          1           0.000001590   -0.000000124   -0.000001799
   19          1           0.000001295    0.000000042   -0.000002225
   20          1           0.000002622   -0.000000088   -0.000000795
   21          6          -0.000000581   -0.000164056   -0.000072781
   22          1           0.000001693   -0.000000055    0.000003376
   23          1           0.000001048   -0.000000308    0.000002324
   24          1           0.000002275    0.000000349    0.000000903
 -------------------------------------------------------------------
 Cartesian Forces:  Max     0.000284516 RMS     0.000054583

 GradGradGradGradGradGradGradGradGradGradGradGradGradGradGradGradGradGrad
 Berny optimization.
 Internal  Forces:  Max     0.000169154 RMS     0.000026404
 Search for a local minimum.
 Step number   1 out of a maximum of 127
 All quantities printed in internal units (Hartrees-Bohrs-Radians)
 Second derivative matrix not updated -- analytic derivatives used.
     Eigenvalues ---    0.00205   0.00225   0.00283   0.00298   0.00453
     Eigenvalues ---    0.00676   0.01144   0.02066   0.04029   0.04139
     Eigenvalues ---    0.04448   0.04511   0.04517   0.04546   0.04585
     Eigenvalues ---    0.04606   0.04675   0.04715   0.05123   0.05347
     Eigenvalues ---    0.05436   0.05473   0.08512   0.11988   0.12064
     Eigenvalues ---    0.12416   0.12422   0.12774   0.13035   0.13171
     Eigenvalues ---    0.13480   0.14568   0.14606   0.14771   0.15038
     Eigenvalues ---    0.15149   0.18386   0.18813   0.19769   0.19934
     Eigenvalues ---    0.22105   0.24067   0.26716   0.27288   0.27630
     Eigenvalues ---    0.28009   0.28964   0.31286   0.32519   0.33309
     Eigenvalues ---    0.33337   0.33362   0.33490   0.33498   0.33554
     Eigenvalues ---    0.33756   0.33782   0.33815   0.34351   0.34471
     Eigenvalues ---    0.34751   0.34782   0.34846   0.38463   0.45239
     Eigenvalues ---    0.806301000.000001000.000001000.000001000.00000
     Eigenvalues --- 1000.000001000.000001000.000001000.000001000.00000
     Eigenvalues --- 1000.000001000.000001000.000001000.000001000.00000
     Eigenvalues --- 1000.000001000.000001000.000001000.000001000.00000
     Eigenvalues --- 1000.000001000.000001000.000001000.000001000.00000
     Eigenvalues --- 1000.000001000.000001000.000001000.000001000.00000
     Eigenvalues --- 1000.000001000.000001000.000001000.000001000.00000
     Eigenvalues --- 1000.000001000.000001000.000001000.000001000.00000
     Eigenvalues --- 1000.000001000.000001000.000001000.000001000.00000
     Eigenvalues --- 1000.000001000.000001000.000001000.000001000.00000
     Eigenvalues --- 1000.000001000.00000
 RFO step:  Lambda=-1.20161106D-05.
 Linear search not attempted -- first point.
 Iteration  1 RMS(Cart)=  0.01115603 RMS(Int)=  0.00003532
 Iteration  2 RMS(Cart)=  0.00005896 RMS(Int)=  0.00000577
 Iteration  3 RMS(Cart)=  0.00000000 RMS(Int)=  0.00000577
 Variable       Old X    -DE/DX   Delta X   Delta X   Delta X     New X
                                 (Linear)    (Quad)   (Total)
    R1        2.80185   0.00000   0.00000   0.00000   0.00000   2.80185
    R2        2.78513   0.00000   0.00000  -0.00002  -0.00002   2.78511
    R3        2.56731   0.00000   0.00000   0.00002   0.00002   2.56733
    R4        2.06156   0.00000   0.00000   0.00000   0.00000   2.06156
    R5        2.89614   0.00000   0.00000   0.00013   0.00013   2.89627
    R6        2.89646   0.00000   0.00000  -0.00010  -0.00010   2.89636
    R7        2.06443   0.00000   0.00000   0.00000   0.00000   2.06443
    R8        2.06275   0.00000   0.00000  -0.00001  -0.00001   2.06273
    R9        2.05733   0.00000   0.00000  -0.00007  -0.00007   2.05726
   R10        2.06539   0.00000   0.00000  -0.00006  -0.00006   2.06533
   R11        2.89563   0.00000   0.00000   0.00029   0.00029   2.89592
   R12        2.89577   0.00000   0.00000  -0.00015  -0.00015   2.89563
   R13        2.06377   0.00000   0.00000   0.00005   0.00005   2.06381
   R14        2.06363   0.00000   0.00000   0.00004   0.00004   2.06367
   R15        2.06162   0.00000   0.00000   0.00001   0.00001   2.06163
   R16        2.08971   0.00000   0.00000   0.00000   0.00000   2.08970
   R17        2.30294   0.00000   0.00000   0.00001   0.00001   2.30295
   R18        2.06439   0.00000   0.00000   0.00000   0.00000   2.06439
   R19        2.05706   0.00000   0.00000   0.00005   0.00005   2.05711
   R20        2.06270   0.00000   0.00000   0.00001   0.00001   2.06271
   R21        2.06366   0.00000   0.00000  -0.00004  -0.00004   2.06362
   R22        2.06389   0.00000   0.00000  -0.00013  -0.00013   2.06376
   R23        2.06163   0.00000   0.00000   0.00000   0.00000   2.06163
    A1        2.08817   0.00000   0.00000   0.00018   0.00014   2.08831
    A2        2.10953   0.00000   0.00000   0.00001  -0.00003   2.10951
    A3        2.08542   0.00000   0.00000  -0.00003  -0.00006   2.08536
    A4        1.83412   0.00000   0.00000   0.00008   0.00008   1.83420
    A5        1.95437   0.00000   0.00000   0.00097   0.00097   1.95534
    A6        1.95533   0.00000   0.00000  -0.00109  -0.00109   1.95424
    A7        1.87673   0.00000   0.00000  -0.00019  -0.00019   1.87654
    A8        1.87601   0.00000   0.00000   0.00033   0.00033   1.87634
    A9        1.95926   0.00000   0.00000  -0.00007  -0.00007   1.95920
   A10        1.91375   0.00000   0.00000  -0.00032  -0.00032   1.91343
   A11        1.93690   0.00000   0.00000   0.00014   0.00014   1.93704
   A12        1.93529   0.00000   0.00000   0.00022   0.00022   1.93551
   A13        1.88569   0.00000   0.00000  -0.00010  -0.00010   1.88559
   A14        1.89492   0.00000   0.00000   0.00011   0.00011   1.89502
   A15        1.89610   0.00000   0.00000  -0.00005  -0.00005   1.89605
   A16        1.83269   0.00000   0.00000   0.00030   0.00030   1.83299
   A17        1.95900   0.00001   0.00000  -0.00031  -0.00031   1.95869
   A18        1.95898   0.00002   0.00000  -0.00001  -0.00001   1.95897
   A19        1.87370   0.00000   0.00000   0.00076   0.00076   1.87446
   A20        1.87408   0.00006   0.00000   0.00025   0.00025   1.87433
   A21        1.95678  -0.00008   0.00000  -0.00082  -0.00082   1.95595
   A22        1.95275   0.00000   0.00000  -0.00066  -0.00066   1.95208
   A23        1.91998   0.00000   0.00000   0.00048   0.00048   1.92045
   A24        1.93516   0.00000   0.00000   0.00005   0.00005   1.93521
   A25        1.87496   0.00000   0.00000   0.00022   0.00022   1.87519
   A26        1.88950   0.00000   0.00000  -0.00011  -0.00011   1.88938
   A27        1.88932   0.00000   0.00000   0.00004   0.00004   1.88936
   A28        1.95661   0.00000   0.00000  -0.00001  -0.00001   1.95660
   A29        2.20641   0.00000   0.00000   0.00004   0.00004   2.20644
   A30        2.12016   0.00000   0.00000  -0.00002  -0.00002   2.12014
   A31        1.91348   0.00000   0.00000   0.00037   0.00037   1.91385
   A32        1.93541   0.00000   0.00000  -0.00045  -0.00045   1.93496
   A33        1.93656   0.00000   0.00000  -0.00008  -0.00008   1.93648
   A34        1.89558   0.00000   0.00000  -0.00006  -0.00006   1.89552
   A35        1.88586   0.00000   0.00000   0.00013   0.00013   1.88599
   A36        1.89577   0.00000   0.00000   0.00010   0.00010   1.89587
   A37        1.92081   0.00000   0.00000  -0.00041  -0.00041   1.92040
   A38        1.95148   0.00000   0.00000   0.00043   0.00043   1.95191
   A39        1.93531   0.00000   0.00000   0.00013   0.00013   1.93544
   A40        1.87555   0.00000   0.00000  -0.00023  -0.00023   1.87533
   A41        1.88944   0.00000   0.00000  -0.00008  -0.00008   1.88935
   A42        1.88911   0.00000   0.00000   0.00014   0.00014   1.88925
    D1        0.00319  -0.00003   0.00000  -0.00731  -0.00731  -0.00413
    D2        2.03535  -0.00003   0.00000  -0.00701  -0.00701   2.02834
    D3       -2.02860  -0.00003   0.00000  -0.00720  -0.00720  -2.03580
    D4        3.13312   0.00003   0.00000   0.00856   0.00856  -3.14151
    D5       -1.11790   0.00003   0.00000   0.00886   0.00886  -1.10904
    D6        1.10133   0.00003   0.00000   0.00867   0.00867   1.11000
    D7       -3.13381  -0.00002   0.00000  -0.00884  -0.00883   3.14054
    D8       -1.10376  -0.00002   0.00000  -0.00791  -0.00791  -1.11167
    D9        1.11889  -0.00011   0.00000  -0.00930  -0.00930   1.10959
   D10        0.01928  -0.00008   0.00000  -0.02449  -0.02449  -0.00520
   D11        2.04933  -0.00008   0.00000  -0.02356  -0.02356   2.02576
   D12       -2.01121  -0.00017   0.00000  -0.02495  -0.02495  -2.03616
   D13       -3.13686  -0.00003   0.00000  -0.00585  -0.00585   3.14048
   D14        0.00591  -0.00003   0.00000  -0.00755  -0.00755  -0.00164
   D15       -0.00691   0.00003   0.00000   0.01000   0.01000   0.00309
   D16        3.13586   0.00003   0.00000   0.00830   0.00830  -3.13903
   D17       -3.04855   0.00000   0.00000   0.00194   0.00194  -3.04660
   D18       -0.96669   0.00000   0.00000   0.00170   0.00170  -0.96499
   D19        1.14235   0.00000   0.00000   0.00188   0.00188   1.14423
   D20       -1.04229   0.00000   0.00000   0.00244   0.00244  -1.03986
   D21        1.03956   0.00000   0.00000   0.00219   0.00219   1.04176
   D22       -3.13459   0.00000   0.00000   0.00238   0.00238  -3.13221
   D23        1.01752   0.00000   0.00000   0.00269   0.00269   1.02021
   D24        3.09938   0.00000   0.00000   0.00244   0.00244   3.10182
   D25       -1.07477   0.00000   0.00000   0.00262   0.00262  -1.07215
   D26        3.04737   0.00000   0.00000   0.00194   0.00194   3.04931
   D27       -1.14279   0.00000   0.00000   0.00182   0.00182  -1.14097
   D28        0.96569   0.00000   0.00000   0.00160   0.00160   0.96728
   D29        1.04103   0.00000   0.00000   0.00224   0.00224   1.04327
   D30        3.13406   0.00000   0.00000   0.00212   0.00212   3.13618
   D31       -1.04065   0.00000   0.00000   0.00190   0.00190  -1.03875
   D32       -1.01922   0.00000   0.00000   0.00231   0.00231  -1.01691
   D33        1.07381   0.00000   0.00000   0.00218   0.00218   1.07600
   D34       -3.10090   0.00000   0.00000   0.00196   0.00196  -3.09894
   D35        1.15554  -0.00001   0.00000  -0.00274  -0.00274   1.15281
   D36       -3.04506  -0.00001   0.00000  -0.00257  -0.00257  -3.04762
   D37       -0.95578  -0.00001   0.00000  -0.00217  -0.00217  -0.95795
   D38       -3.12243  -0.00001   0.00000  -0.00209  -0.00209  -3.12452
   D39       -1.03985  -0.00001   0.00000  -0.00192  -0.00192  -1.04177
   D40        1.04943  -0.00001   0.00000  -0.00153  -0.00153   1.04790
   D41       -1.06828   0.00002   0.00000  -0.00178  -0.00178  -1.07006
   D42        1.01430   0.00002   0.00000  -0.00161  -0.00161   1.01269
   D43        3.10358   0.00002   0.00000  -0.00122  -0.00122   3.10236
   D44        3.05571   0.00003   0.00000  -0.00245  -0.00245   3.05326
   D45       -1.14441   0.00003   0.00000  -0.00273  -0.00273  -1.14715
   D46        0.96565   0.00003   0.00000  -0.00217  -0.00217   0.96349
   D47        1.05028  -0.00002   0.00000  -0.00295  -0.00295   1.04733
   D48        3.13335  -0.00002   0.00000  -0.00323  -0.00323   3.13011
   D49       -1.03977  -0.00002   0.00000  -0.00267  -0.00267  -1.04244
   D50       -1.00364  -0.00001   0.00000  -0.00357  -0.00357  -1.00721
   D51        1.07943  -0.00001   0.00000  -0.00385  -0.00385   1.07558
   D52       -3.09369  -0.00001   0.00000  -0.00328  -0.00328  -3.09698
         Item               Value     Threshold  Converged?
 Maximum Force            0.000169     0.000015     NO 
 RMS     Force            0.000026     0.000010     NO 
 Maximum Displacement     0.041147     0.000060     NO 
 RMS     Displacement     0.011156     0.000040     NO 
 Predicted change in Energy=-6.025254D-06
 GradGradGradGradGradGradGradGradGradGradGradGradGradGradGradGradGradGrad

                          Input orientation:                          
 ---------------------------------------------------------------------
 Center     Atomic     Atomic              Coordinates (Angstroms)
 Number     Number      Type              X           Y           Z
 ---------------------------------------------------------------------
    1          7             0       -0.057733    0.390519   -0.014045
    2          6             0        0.667316   -0.901805    0.036225
    3          1             0       -0.112549   -1.663915    0.069773
    4          6             0        1.496380   -1.145531   -1.229569
    5          1             0        1.934698   -2.145572   -1.194334
    6          1             0        0.873238   -1.080952   -2.123443
    7          1             0        2.300977   -0.416951   -1.313022
    8          6             0       -1.531520    0.400149   -0.014964
    9          1             0       -1.807885    1.456804   -0.054840
   10          6             0       -2.114788   -0.273418   -1.261766
   11          1             0       -1.894558   -1.342819   -1.286570
   12          1             0       -3.201141   -0.162618   -1.273238
   13          1             0       -1.715569    0.178858   -2.170768
   14          6             0        0.618634    1.567687   -0.064258
   15          1             0       -0.062738    2.437973   -0.098616
   16          8             0        1.829314    1.706737   -0.072319
   17          6             0        1.503228   -1.041007    1.313333
   18          1             0        1.944493   -2.039409    1.356676
   19          1             0        2.305502   -0.305524    1.333692
   20          1             0        0.883832   -0.905944    2.201909
   21          6             0       -2.116081   -0.177659    1.278237
   22          1             0       -3.202916   -0.071363    1.277661
   23          1             0       -1.891102   -1.240864    1.386203
   24          1             0       -1.722089    0.345195    2.150934
 ---------------------------------------------------------------------
                    Distance matrix (angstroms):
                    1          2          3          4          5
     1  N    0.000000
     2  C    1.482675   0.000000
     3  H    2.056874   1.090930   0.000000
     4  C    2.500442   1.532640   2.132056   0.000000
     5  H    3.434330   2.160438   2.453810   1.092450   0.000000
     6  H    2.735231   2.176847   2.474230   1.091552   1.767303
     7  H    2.811203   2.173569   3.048303   1.088655   1.770983
     8  C    1.473819   2.555892   2.506196   3.610065   4.459403
     9  H    2.049796   3.420227   3.553672   4.366956   5.318129
    10  C    2.495816   3.133649   2.777668   3.715124   4.461821
    11  H    2.828021   2.916758   2.262371   3.397150   3.913582
    12  H    3.431114   4.150429   3.687408   4.799451   5.505923
    13  H    2.728493   3.422981   3.314440   3.599510   4.436311
    14  C    1.358572   2.472015   3.315998   3.080574   4.098462
    15  H    2.049206   3.421298   4.105645   4.068341   5.118519
    16  O    2.301472   2.857712   3.892599   3.096047   4.013766
    17  C    2.499559   1.532687   2.131945   2.545059   2.773919
    18  H    3.433996   2.160766   2.455308   2.772813   2.553237
    19  H    2.808157   2.173159   3.047899   2.816132   3.148680
    20  H    2.734559   2.176484   2.472509   3.493946   3.765032
    21  C    2.495920   3.132775   2.771910   4.502859   5.137617
    22  H    3.431329   4.148433   3.680433   5.433546   6.066976
    23  H    2.825482   2.912543   2.252824   4.280933   4.702598
    24  H    2.731166   3.425822   3.310344   4.899858   5.546786
                    6          7          8          9         10
     6  H    0.000000
     7  H    1.770909   0.000000
     8  C    3.524514   4.128031   0.000000
     9  H    4.231754   4.687934   1.092927   0.000000
    10  C    3.212926   4.418395   1.532453   2.131791   0.000000
    11  H    2.903381   4.296562   2.187856   3.059830   1.092124
    12  H    4.262247   5.508138   2.165086   2.459306   1.092050
    13  H    2.879458   4.150104   2.174934   2.473625   1.090969
    14  C    3.364573   2.885910   2.447189   2.429069   3.506464
    15  H    4.166390   3.900323   2.513373   2.002534   3.593810
    16  O    3.590599   2.504369   3.606338   3.645818   4.570749
    17  C    3.494268   2.814887   3.612616   4.367428   4.506702
    18  H    3.765296   3.144319   4.462679   5.319420   5.143221
    19  H    3.821577   2.649062   4.127903   4.685485   5.126051
    20  H    4.328904   3.821277   3.529069   4.233301   4.624809
    21  C    4.617725   5.126625   1.532300   2.131561   2.541809
    22  H    5.403870   6.092940   2.164894   2.461091   2.770116
    23  H    4.470432   5.053532   2.187577   3.059567   2.828026
    24  H    5.199991   5.363294   2.174959   2.471533   3.490475
                   11         12         13         14         15
    11  H    0.000000
    12  H    1.760742   0.000000
    13  H    1.768996   1.768924   0.000000
    14  C    4.034999   4.364204   3.437256   0.000000
    15  H    4.365911   4.241743   3.482709   1.105824   0.000000
    16  O    4.964013   5.499290   4.393643   1.218666   2.028611
    17  C    4.289001   5.439946   4.897722   3.079862   4.068065
    18  H    4.712780   6.075882   5.546136   4.097328   5.117988
    19  H    5.057890   6.094229   5.355826   2.882483   3.897030
    20  H    4.481048   5.414443   5.201345   3.365218   4.167756
    21  C    2.825757   2.772654   3.490438   3.511010   3.599093
    22  H    3.147012   2.552531   3.763838   4.369379   4.248720
    23  H    2.674719   3.154591   3.833858   4.036158   4.368231
    24  H    3.833480   3.764363   4.324907   3.446816   3.491939
                   16         17         18         19         20
    16  O    0.000000
    17  C    3.094586   0.000000
    18  H    4.011098   1.092428   0.000000
    19  H    2.500563   1.088574   1.771218   0.000000
    20  H    3.590565   1.091541   1.767530   1.770720   0.000000
    21  C    4.576144   3.721021   4.467720   4.423778   3.222273
    22  H    5.505219   4.805130   5.511376   5.513678   4.272268
    23  H    4.965596   3.400990   3.917950   4.299896   2.911667
    24  H    4.405578   3.609127   4.445335   4.160866   2.891154
                   21         22         23         24
    21  C    0.000000
    22  H    1.092022   0.000000
    23  H    1.092097   1.760787   0.000000
    24  H    1.090965   1.768891   1.768887   0.000000
 Stoichiometry    C7H15NO
 Framework group  C1[X(C7H15NO)]
 Deg. of freedom    66
 Full point group                 C1
 Largest Abelian subgroup         C1      NOp   1
 Largest concise Abelian subgroup C1      NOp   1
                         Standard orientation:                         
 ---------------------------------------------------------------------
 Center     Atomic     Atomic              Coordinates (Angstroms)
 Number     Number      Type              X           Y           Z
 ---------------------------------------------------------------------
    1          7             0        0.057689    0.390711   -0.004222
    2          6             0       -0.667139   -0.902697    0.002536
    3          1             0        0.112858   -1.665410    0.002956
    4          6             0       -1.496522   -1.090322    1.277646
    5          1             0       -1.934670   -2.091019    1.286571
    6          1             0       -0.873644   -0.986149    2.167958
    7          1             0       -2.301260   -0.358902    1.328558
    8          6             0        1.531474    0.400627   -0.003323
    9          1             0        1.807658    1.458060   -0.010161
   10          6             0        2.114496   -0.217014    1.272222
   11          1             0        1.894431   -1.284308    1.344256
   12          1             0        3.200829   -0.105627    1.279080
   13          1             0        1.714947    0.274969    2.160212
   14          6             0       -0.618881    1.568831   -0.006329
   15          1             0        0.062341    2.439903   -0.010322
   16          8             0       -1.829587    1.707893   -0.004763
   17          6             0       -1.502666   -1.098413   -1.267393
   18          1             0       -1.943758   -2.097831   -1.266641
   19          1             0       -2.305052   -0.364690   -1.320495
   20          1             0       -0.883039   -1.002690   -2.160904
   21          6             0        2.116494   -0.233732   -1.269531
   22          1             0        3.203312   -0.127326   -1.273358
   23          1             0        1.891717   -1.300711   -1.330411
   24          1             0        1.722666    0.249930   -2.164615
 ---------------------------------------------------------------------
 Rotational constants (GHZ):      1.9825657      1.2018203      1.1106965
 Standard basis: TZVP (5D, 7F)
 There are   261 symmetry adapted basis functions of A   symmetry.
 Integral buffers will be    131072 words long.
 Raffenetti 2 integral format.
 Two-electron integral symmetry is turned on.
   261 basis functions,   435 primitive gaussians,   270 cartesian basis functions
    36 alpha electrons       36 beta electrons
       nuclear repulsion energy       498.0424602166 Hartrees.
 NAtoms=   24 NActive=   24 NUniq=   24 SFac= 7.50D-01 NAtFMM=   80 NAOKFM=F Big=F
 One-electron integrals computed using PRISM.
 NBasis=   261 RedAO= T  NBF=   261
 NBsUse=   261 1.00D-06 NBFU=   261
 Initial guess read from the read-write file:
 Initial guess orbital symmetries:
       Occupied  (A) (A) (A) (A) (A) (A) (A) (A) (A) (A) (A) (A)
                 (A) (A) (A) (A) (A) (A) (A) (A) (A) (A) (A) (A)
                 (A) (A) (A) (A) (A) (A) (A) (A) (A) (A) (A) (A)
       Virtual   (A) (A) (A) (A) (A) (A) (A) (A) (A) (A) (A) (A)
                 (A) (A) (A) (A) (A) (A) (A) (A) (A) (A) (A) (A)
                 (A) (A) (A) (A) (A) (A) (A) (A) (A) (A) (A) (A)
                 (A) (A) (A) (A) (A) (A) (A) (A) (A) (A) (A) (A)
                 (A) (A) (A) (A) (A) (A) (A) (A) (A) (A) (A) (A)
                 (A) (A) (A) (A) (A) (A) (A) (A) (A) (A) (A) (A)
                 (A) (A) (A) (A) (A) (A) (A) (A) (A) (A) (A) (A)
                 (A) (A) (A) (A) (A) (A) (A) (A) (A) (A) (A) (A)
                 (A) (A) (A) (A) (A) (A) (A) (A) (A) (A) (A) (A)
                 (A) (A) (A) (A) (A) (A) (A) (A) (A) (A) (A) (A)
                 (A) (A) (A) (A) (A) (A) (A) (A) (A) (A) (A) (A)
                 (A) (A) (A) (A) (A) (A) (A) (A) (A) (A) (A) (A)
                 (A) (A) (A) (A) (A) (A) (A) (A) (A) (A) (A) (A)
                 (A) (A) (A) (A) (A) (A) (A) (A) (A) (A) (A) (A)
                 (A) (A) (A) (A) (A) (A) (A) (A) (A) (A) (A) (A)
                 (A) (A) (A) (A) (A) (A) (A) (A) (A) (A) (A) (A)
                 (A) (A) (A) (A) (A) (A) (A) (A) (A) (A) (A) (A)
                 (A) (A) (A) (A) (A) (A) (A) (A) (A) (A) (A) (A)
                 (A) (A) (A) (A) (A) (A) (A) (A) (A)
 Harris functional with IExCor=  402 diagonalized for initial guess.
 ExpMin= 9.52D-02 ExpMax= 2.70D+04 ExpMxC= 9.22D+02 IAcc=2 IRadAn=         4 AccDes= 0.00D+00
 HarFok:  IExCor= 402 AccDes= 0.00D+00 IRadAn=         4 IDoV=1
 ScaDFX=  1.000000  1.000000  1.000000  1.000000
 Requested convergence on RMS density matrix=1.00D-08 within 128 cycles.
 Requested convergence on MAX density matrix=1.00D-06.
 Requested convergence on             energy=1.00D-06.
 No special actions if energy rises.
 Integral accuracy reduced to 1.0D-05 until final iterations.
 Initial convergence to 1.0D-05 achieved.  Increase integral accuracy.
 SCF Done:  E(RB+HF-LYP) =  -405.915397733     A.U. after   16 cycles
             Convg  =    0.1521D-08             -V/T =  2.0052
             S**2   =   0.0000
 Range of M.O.s used for correlation:     1   261
 NBasis=   261 NAE=    36 NBE=    36 NFC=     0 NFV=     0
 NROrb=    261 NOA=    36 NOB=    36 NVA=   225 NVB=   225

 **** Warning!!: The largest alpha MO coefficient is  0.20200484D+02

 Symmetrizing basis deriv contribution to polar:
 IMax=3 JMax=2 DiffMx= 0.00D+00
 G2DrvN: will do   25 centers at a time, making    1 passes doing MaxLOS=2.
 FoFDir/FoFCou used for L=0 through L=2.
 DoAtom=TTTTTTTTTTTTTTTTTTTTTTTT
          Differentiating once with respect to electric field.
                with respect to dipole field.
          Differentiating once with respect to nuclear coordinates.
 Integrals replicated using symmetry in FoFDir.
 MinBra= 0 MaxBra= 2 Meth= 1.
 IRaf=       0 NMat=  75 IRICut=      75 DoRegI=T DoRafI=T ISym2E= 2 JSym2E=2.
          There are  75 degrees of freedom in the 1st order CPHF.
    72 vectors were produced by pass  0.
 AX will form  72 AO Fock derivatives at one time.
    72 vectors were produced by pass  1.
    72 vectors were produced by pass  2.
    72 vectors were produced by pass  3.
    72 vectors were produced by pass  4.
    43 vectors were produced by pass  5.
     6 vectors were produced by pass  6.
     2 vectors were produced by pass  7.
 Inv2:  IOpt= 1 Iter= 1 AM= 3.04D-15 Conv= 1.00D-12.
 Inverted reduced A of dimension  411 with in-core refinement.
 Isotropic polarizability for W=    0.000000       94.27 Bohr**3.
 End of Minotr Frequency-dependent properties file   721 does not exist.
 ***** Axes restored to original set *****
 -------------------------------------------------------------------
 Center     Atomic                   Forces (Hartrees/Bohr)
 Number     Number              X              Y              Z
 -------------------------------------------------------------------
    1          7           0.000005826    0.000014144   -0.000080591
    2          6           0.000014222    0.000047617    0.000075508
    3          1           0.000025267   -0.000001766   -0.000032564
    4          6           0.000018418   -0.000014370    0.000004014
    5          1           0.000000642   -0.000001649    0.000005964
    6          1           0.000003560    0.000013838    0.000018480
    7          1          -0.000026353    0.000011983   -0.000022471
    8          6           0.000000599   -0.000007538   -0.000047429
    9          1           0.000002077    0.000001865   -0.000019846
   10          6          -0.000015667   -0.000012262    0.000021769
   11          1           0.000008633    0.000010431   -0.000005010
   12          1           0.000003590   -0.000002727    0.000002394
   13          1          -0.000016286   -0.000002872    0.000000190
   14          6          -0.000012755   -0.000004301    0.000059269
   15          1          -0.000000268   -0.000005361   -0.000006266
   16          8           0.000000190   -0.000013578   -0.000022029
   17          6          -0.000059511   -0.000003684   -0.000040339
   18          1           0.000001770   -0.000000853    0.000002718
   19          1           0.000049780   -0.000011569    0.000031158
   20          1           0.000000053   -0.000019276    0.000019587
   21          6           0.000029739   -0.000008108    0.000023158
   22          1          -0.000005120    0.000005526    0.000005275
   23          1          -0.000048384    0.000005004    0.000011752
   24          1           0.000019978   -0.000000493   -0.000004692
 -------------------------------------------------------------------
 Cartesian Forces:  Max     0.000080591 RMS     0.000024048

 GradGradGradGradGradGradGradGradGradGradGradGradGradGradGradGradGradGrad
 Berny optimization.
 Internal  Forces:  Max     0.000068327 RMS     0.000021906
 Search for a local minimum.
 Step number   2 out of a maximum of 127
 All quantities printed in internal units (Hartrees-Bohrs-Radians)
 Second derivative matrix not updated -- analytic derivatives used.
 Trust test= 6.32D-01 RLast= 5.34D-02 DXMaxT set to 3.00D-01
     Eigenvalues ---    0.00203   0.00225   0.00281   0.00295   0.00461
     Eigenvalues ---    0.00682   0.01149   0.02070   0.04040   0.04159
     Eigenvalues ---    0.04446   0.04508   0.04516   0.04546   0.04585
     Eigenvalues ---    0.04607   0.04678   0.04711   0.05127   0.05357
     Eigenvalues ---    0.05427   0.05472   0.08513   0.11983   0.12056
     Eigenvalues ---    0.12413   0.12416   0.12771   0.13059   0.13190
     Eigenvalues ---    0.13484   0.14555   0.14592   0.14775   0.15035
     Eigenvalues ---    0.15141   0.18389   0.18834   0.19781   0.19931
     Eigenvalues ---    0.22112   0.24059   0.26722   0.27296   0.27630
     Eigenvalues ---    0.28022   0.28959   0.31285   0.32524   0.33311
     Eigenvalues ---    0.33343   0.33357   0.33492   0.33497   0.33552
     Eigenvalues ---    0.33758   0.33785   0.33817   0.34359   0.34468
     Eigenvalues ---    0.34749   0.34782   0.34844   0.38449   0.45225
     Eigenvalues ---    0.806331000.000001000.000001000.000001000.00000
     Eigenvalues --- 1000.000001000.000001000.000001000.000001000.00000
     Eigenvalues --- 1000.000001000.000001000.000001000.000001000.00000
     Eigenvalues --- 1000.000001000.000001000.000001000.000001000.00000
     Eigenvalues --- 1000.000001000.000001000.000001000.000001000.00000
     Eigenvalues --- 1000.000001000.000001000.000001000.000001000.00000
     Eigenvalues --- 1000.000001000.000001000.000001000.000001000.00000
     Eigenvalues --- 1000.000001000.000001000.000001000.000001000.00000
     Eigenvalues --- 1000.000001000.000001000.000001000.000001000.00000
     Eigenvalues --- 1000.000001000.000001000.000001000.000001000.00000
     Eigenvalues --- 1000.000001000.00000
 RFO step:  Lambda=-6.97965444D-07.
 Quintic linear search produced a step of -0.27134.
 Iteration  1 RMS(Cart)=  0.00360687 RMS(Int)=  0.00000354
 Iteration  2 RMS(Cart)=  0.00000597 RMS(Int)=  0.00000098
 Iteration  3 RMS(Cart)=  0.00000000 RMS(Int)=  0.00000098
 Variable       Old X    -DE/DX   Delta X   Delta X   Delta X     New X
                                 (Linear)    (Quad)   (Total)
    R1        2.80185   0.00000   0.00000  -0.00006  -0.00006   2.80179
    R2        2.78511   0.00002   0.00000   0.00001   0.00002   2.78513
    R3        2.56733  -0.00003   0.00000  -0.00003  -0.00003   2.56730
    R4        2.06156  -0.00002   0.00000  -0.00002  -0.00002   2.06154
    R5        2.89627  -0.00001  -0.00004   0.00004   0.00001   2.89628
    R6        2.89636   0.00001   0.00003  -0.00007  -0.00004   2.89631
    R7        2.06443   0.00000   0.00000  -0.00001  -0.00001   2.06442
    R8        2.06273  -0.00002   0.00000  -0.00001   0.00000   2.06273
    R9        2.05726  -0.00001   0.00002  -0.00005  -0.00003   2.05723
   R10        2.06533   0.00000   0.00002  -0.00001   0.00001   2.06534
   R11        2.89592  -0.00001  -0.00008  -0.00003  -0.00011   2.89580
   R12        2.89563   0.00003   0.00004   0.00011   0.00015   2.89578
   R13        2.06381  -0.00001  -0.00001  -0.00002  -0.00004   2.06378
   R14        2.06367   0.00000  -0.00001  -0.00001  -0.00002   2.06366
   R15        2.06163  -0.00001   0.00000  -0.00001  -0.00001   2.06162
   R16        2.08970   0.00000   0.00000  -0.00001  -0.00001   2.08970
   R17        2.30295   0.00000   0.00000   0.00000   0.00000   2.30294
   R18        2.06439   0.00000   0.00000   0.00002   0.00002   2.06441
   R19        2.05711   0.00003  -0.00001   0.00010   0.00008   2.05719
   R20        2.06271   0.00001   0.00000   0.00002   0.00001   2.06273
   R21        2.06362   0.00001   0.00001   0.00002   0.00003   2.06365
   R22        2.06376  -0.00001   0.00003  -0.00002   0.00001   2.06378
   R23        2.06163   0.00000   0.00000   0.00000   0.00000   2.06163
    A1        2.08831   0.00005  -0.00004   0.00014   0.00011   2.08841
    A2        2.10951  -0.00003   0.00001  -0.00012  -0.00010   2.10940
    A3        2.08536  -0.00001   0.00002  -0.00002   0.00001   2.08537
    A4        1.83420   0.00001  -0.00002   0.00004   0.00002   1.83421
    A5        1.95534  -0.00006  -0.00026  -0.00018  -0.00044   1.95489
    A6        1.95424   0.00007   0.00030   0.00038   0.00068   1.95492
    A7        1.87654   0.00000   0.00005  -0.00035  -0.00030   1.87624
    A8        1.87634  -0.00003  -0.00009  -0.00008  -0.00017   1.87617
    A9        1.95920   0.00001   0.00002   0.00015   0.00017   1.95936
   A10        1.91343   0.00000   0.00009   0.00005   0.00014   1.91357
   A11        1.93704  -0.00002  -0.00004  -0.00026  -0.00029   1.93674
   A12        1.93551   0.00001  -0.00006   0.00009   0.00003   1.93553
   A13        1.88559   0.00001   0.00003   0.00009   0.00012   1.88571
   A14        1.89502   0.00001  -0.00003   0.00016   0.00013   1.89515
   A15        1.89605  -0.00001   0.00001  -0.00013  -0.00012   1.89594
   A16        1.83299  -0.00001  -0.00008  -0.00001  -0.00009   1.83290
   A17        1.95869   0.00006   0.00009   0.00014   0.00023   1.95891
   A18        1.95897  -0.00003   0.00000  -0.00002  -0.00002   1.95895
   A19        1.87446   0.00000  -0.00021   0.00002  -0.00019   1.87427
   A20        1.87433   0.00000  -0.00007   0.00013   0.00007   1.87440
   A21        1.95595  -0.00001   0.00022  -0.00024  -0.00001   1.95594
   A22        1.95208   0.00000   0.00018  -0.00005   0.00013   1.95221
   A23        1.92045   0.00000  -0.00013  -0.00001  -0.00013   1.92032
   A24        1.93521   0.00001  -0.00001   0.00010   0.00009   1.93530
   A25        1.87519   0.00000  -0.00006   0.00003  -0.00003   1.87516
   A26        1.88938  -0.00001   0.00003  -0.00005  -0.00002   1.88937
   A27        1.88936  -0.00001  -0.00001  -0.00003  -0.00004   1.88933
   A28        1.95660   0.00000   0.00000   0.00002   0.00003   1.95663
   A29        2.20644  -0.00002  -0.00001  -0.00006  -0.00007   2.20638
   A30        2.12014   0.00001   0.00001   0.00004   0.00004   2.12018
   A31        1.91385  -0.00002  -0.00010  -0.00017  -0.00027   1.91358
   A32        1.93496   0.00007   0.00012   0.00043   0.00055   1.93551
   A33        1.93648   0.00001   0.00002   0.00016   0.00018   1.93666
   A34        1.89552  -0.00003   0.00002  -0.00026  -0.00025   1.89528
   A35        1.88599  -0.00001  -0.00004  -0.00020  -0.00023   1.88576
   A36        1.89587  -0.00002  -0.00003   0.00002  -0.00001   1.89587
   A37        1.92040   0.00000   0.00011  -0.00010   0.00001   1.92041
   A38        1.95191   0.00005  -0.00012   0.00024   0.00013   1.95204
   A39        1.93544  -0.00003  -0.00004  -0.00005  -0.00009   1.93535
   A40        1.87533  -0.00003   0.00006  -0.00016  -0.00010   1.87523
   A41        1.88935   0.00001   0.00002  -0.00003  -0.00001   1.88934
   A42        1.88925  -0.00001  -0.00004   0.00010   0.00006   1.88931
    D1       -0.00413   0.00004   0.00198   0.00223   0.00421   0.00008
    D2        2.02834   0.00002   0.00190   0.00174   0.00365   2.03199
    D3       -2.03580   0.00004   0.00195   0.00211   0.00406  -2.03174
    D4       -3.14151   0.00003  -0.00232   0.00145  -0.00088   3.14080
    D5       -1.10904   0.00001  -0.00240   0.00096  -0.00144  -1.11048
    D6        1.11000   0.00003  -0.00235   0.00133  -0.00103   1.10898
    D7        3.14054   0.00001   0.00240  -0.00072   0.00168  -3.14096
    D8       -1.11167   0.00002   0.00215  -0.00063   0.00151  -1.11016
    D9        1.10959   0.00002   0.00252  -0.00086   0.00167   1.11125
   D10       -0.00520   0.00002   0.00664   0.00005   0.00670   0.00149
   D11        2.02576   0.00003   0.00639   0.00014   0.00653   2.03229
   D12       -2.03616   0.00004   0.00677  -0.00009   0.00668  -2.02948
   D13        3.14048   0.00000   0.00159  -0.00012   0.00147  -3.14124
   D14       -0.00164   0.00003   0.00205   0.00003   0.00208   0.00044
   D15        0.00309  -0.00001  -0.00271  -0.00090  -0.00361  -0.00052
   D16       -3.13903   0.00001  -0.00225  -0.00075  -0.00300   3.14116
   D17       -3.04660   0.00002  -0.00053  -0.00146  -0.00199  -3.04859
   D18       -0.96499   0.00003  -0.00046  -0.00147  -0.00193  -0.96692
   D19        1.14423   0.00001  -0.00051  -0.00175  -0.00226   1.14196
   D20       -1.03986   0.00000  -0.00066  -0.00172  -0.00238  -1.04224
   D21        1.04176   0.00000  -0.00060  -0.00173  -0.00233   1.03943
   D22       -3.13221  -0.00002  -0.00064  -0.00201  -0.00265  -3.13487
   D23        1.02021  -0.00003  -0.00073  -0.00195  -0.00268   1.01753
   D24        3.10182  -0.00002  -0.00066  -0.00196  -0.00262   3.09920
   D25       -1.07215  -0.00004  -0.00071  -0.00224  -0.00295  -1.07510
   D26        3.04931   0.00001  -0.00053  -0.00075  -0.00128   3.04804
   D27       -1.14097   0.00000  -0.00049  -0.00092  -0.00141  -1.14238
   D28        0.96728   0.00003  -0.00043  -0.00049  -0.00093   0.96636
   D29        1.04327  -0.00002  -0.00061  -0.00095  -0.00156   1.04171
   D30        3.13618  -0.00002  -0.00058  -0.00112  -0.00169   3.13449
   D31       -1.03875   0.00000  -0.00051  -0.00070  -0.00121  -1.03997
   D32       -1.01691  -0.00001  -0.00063  -0.00056  -0.00119  -1.01809
   D33        1.07600  -0.00002  -0.00059  -0.00073  -0.00132   1.07468
   D34       -3.09894   0.00001  -0.00053  -0.00031  -0.00084  -3.09978
   D35        1.15281  -0.00001   0.00074  -0.00162  -0.00088   1.15193
   D36       -3.04762  -0.00001   0.00070  -0.00162  -0.00093  -3.04855
   D37       -0.95795  -0.00001   0.00059  -0.00160  -0.00101  -0.95896
   D38       -3.12452   0.00000   0.00057  -0.00155  -0.00098  -3.12551
   D39       -1.04177   0.00000   0.00052  -0.00155  -0.00103  -1.04280
   D40        1.04790   0.00000   0.00041  -0.00153  -0.00111   1.04679
   D41       -1.07006   0.00000   0.00048  -0.00151  -0.00103  -1.07109
   D42        1.01269   0.00000   0.00044  -0.00151  -0.00107   1.01162
   D43        3.10236  -0.00001   0.00033  -0.00148  -0.00115   3.10121
   D44        3.05326  -0.00004   0.00067  -0.00308  -0.00242   3.05084
   D45       -1.14715  -0.00004   0.00074  -0.00319  -0.00245  -1.14960
   D46        0.96349  -0.00003   0.00059  -0.00294  -0.00235   0.96113
   D47        1.04733  -0.00001   0.00080  -0.00314  -0.00233   1.04500
   D48        3.13011  -0.00001   0.00088  -0.00325  -0.00237   3.12774
   D49       -1.04244   0.00000   0.00072  -0.00299  -0.00227  -1.04471
   D50       -1.00721   0.00000   0.00097  -0.00311  -0.00214  -1.00934
   D51        1.07558   0.00000   0.00104  -0.00322  -0.00217   1.07341
   D52       -3.09698   0.00001   0.00089  -0.00296  -0.00207  -3.09905
         Item               Value     Threshold  Converged?
 Maximum Force            0.000068     0.000015     NO 
 RMS     Force            0.000022     0.000010     NO 
 Maximum Displacement     0.010017     0.000060     NO 
 RMS     Displacement     0.003607     0.000040     NO 
 Predicted change in Energy=-9.740142D-07
 GradGradGradGradGradGradGradGradGradGradGradGradGradGradGradGradGradGrad

                          Input orientation:                          
 ---------------------------------------------------------------------
 Center     Atomic     Atomic              Coordinates (Angstroms)
 Number     Number      Type              X           Y           Z
 ---------------------------------------------------------------------
    1          7             0       -0.057699    0.390429   -0.016748
    2          6             0        0.667565   -0.901720    0.033962
    3          1             0       -0.112150   -1.664093    0.064540
    4          6             0        1.499243   -1.143514   -1.230491
    5          1             0        1.939658   -2.142612   -1.194816
    6          1             0        0.877209   -1.079985   -2.125210
    7          1             0        2.302280   -0.413095   -1.312662
    8          6             0       -1.531495    0.400009   -0.016212
    9          1             0       -1.807838    1.456579   -0.058540
   10          6             0       -2.116286   -0.276493   -1.260637
   11          1             0       -1.895482   -1.345794   -1.283690
   12          1             0       -3.202716   -0.166378   -1.270462
   13          1             0       -1.718952    0.174172   -2.171258
   14          6             0        0.618580    1.567800   -0.062763
   15          1             0       -0.062829    2.438073   -0.096581
   16          8             0        1.829262    1.706949   -0.068470
   17          6             0        1.500571   -1.043016    1.312708
   18          1             0        1.940520   -2.042022    1.355816
   19          1             0        2.303902   -0.308708    1.335931
   20          1             0        0.879507   -0.908464    2.200205
   21          6             0       -2.114740   -0.174532    1.279130
   22          1             0       -3.201377   -0.066062    1.280481
   23          1             0       -1.891776   -1.238021    1.388517
   24          1             0       -1.718015    0.349066    2.150142
 ---------------------------------------------------------------------
                    Distance matrix (angstroms):
                    1          2          3          4          5
     1  N    0.000000
     2  C    1.482642   0.000000
     3  H    2.056851   1.090919   0.000000
     4  C    2.500044   1.532643   2.131830   0.000000
     5  H    3.434177   2.160539   2.454562   1.092444   0.000000
     6  H    2.735285   2.176638   2.472857   1.091551   1.767373
     7  H    2.809723   2.173579   3.048140   1.088638   1.771048
     8  C    1.473827   2.555949   2.506308   3.611414   4.461270
     9  H    2.049735   3.420197   3.553745   4.367006   5.318743
    10  C    2.495962   3.133164   2.774543   3.718156   4.465133
    11  H    2.827907   2.915925   2.258166   3.401163   3.918050
    12  H    3.431176   4.149858   3.684695   4.802584   5.509558
    13  H    2.729183   3.422863   3.310562   3.602515   4.439183
    14  C    1.358556   2.471899   3.315917   3.080646   4.098042
    15  H    2.049206   3.421217   4.105625   4.068610   5.118470
    16  O    2.301417   2.857479   3.892390   3.095860   4.012476
    17  C    2.500084   1.532663   2.131790   2.545185   2.773010
    18  H    3.434185   2.160557   2.454319   2.773271   2.552615
    19  H    2.809927   2.173566   3.048084   2.816186   3.146515
    20  H    2.735024   2.176597   2.472938   3.494138   3.764732
    21  C    2.495976   3.133762   2.775678   4.505330   5.141195
    22  H    3.431312   4.149801   3.684500   5.437069   6.072017
    23  H    2.826740   2.915157   2.258654   4.285690   4.708691
    24  H    2.730160   3.425445   3.313812   4.899717   5.547592
                    6          7          8          9         10
     6  H    0.000000
     7  H    1.770819   0.000000
     8  C    3.527054   4.127923   0.000000
     9  H    4.232583   4.686318   1.092931   0.000000
    10  C    3.217779   4.420983   1.532393   2.131599   0.000000
    11  H    2.909748   4.300229   2.187879   3.059733   1.092104
    12  H    4.267442   5.510683   2.164929   2.459355   1.092040
    13  H    2.883588   4.153597   2.174940   2.473064   1.090964
    14  C    3.366206   2.884621   2.447187   2.428970   3.509389
    15  H    4.168421   3.898942   2.513393   2.002457   3.597302
    16  O    3.592156   2.503268   3.606315   3.645721   4.574129
    17  C    3.494170   2.816399   3.611340   4.367364   4.504588
    18  H    3.764796   3.147229   4.461039   5.318910   5.140097
    19  H    3.822279   2.650650   4.128055   4.686918   5.126526
    20  H    4.328815   3.822291   3.526689   4.232870   4.620778
    21  C    4.621811   5.126828   1.532379   2.131683   2.541813
    22  H    5.409403   6.093855   2.164981   2.460358   2.771098
    23  H    4.476442   5.056379   2.187741   3.059721   2.827182
    24  H    5.201539   5.360473   2.174966   2.472434   3.490467
                   11         12         13         14         15
    11  H    0.000000
    12  H    1.760698   0.000000
    13  H    1.768965   1.768888   0.000000
    14  C    4.037351   4.366717   3.442674   0.000000
    15  H    4.368695   4.245003   3.488878   1.105819   0.000000
    16  O    4.966862   5.502267   4.400107   1.218666   2.028630
    17  C    4.285573   5.437111   4.897437   3.079965   4.067959
    18  H    4.708147   6.071924   5.544682   4.097646   5.118018
    19  H    5.056955   6.093963   5.358815   2.884083   3.898501
    20  H    4.475416   5.409322   5.199402   3.364668   4.166837
    21  C    2.826301   2.772035   3.490475   3.508195   3.595639
    22  H    3.149293   2.552915   3.764279   4.366449   4.244700
    23  H    2.674382   3.152325   3.833556   4.034939   4.366260
    24  H    3.833438   3.764379   4.324938   3.441212   3.485879
                   16         17         18         19         20
    16  O    0.000000
    17  C    3.094834   0.000000
    18  H    4.011951   1.092441   0.000000
    19  H    2.502099   1.088617   1.771106   0.000000
    20  H    3.590168   1.091548   1.767398   1.770756   0.000000
    21  C    4.572871   3.718315   4.465259   4.421044   3.217538
    22  H    5.501869   4.802478   5.509011   5.510903   4.267218
    23  H    4.964049   3.398793   3.915862   4.297686   2.906450
    24  H    4.398780   3.605341   4.442199   4.155891   2.886349
                   21         22         23         24
    21  C    0.000000
    22  H    1.092039   0.000000
    23  H    1.092103   1.760744   0.000000
    24  H    1.090966   1.768899   1.768930   0.000000
 Stoichiometry    C7H15NO
 Framework group  C1[X(C7H15NO)]
 Deg. of freedom    66
 Full point group                 C1
 Largest Abelian subgroup         C1      NOp   1
 Largest concise Abelian subgroup C1      NOp   1
                         Standard orientation:                         
 ---------------------------------------------------------------------
 Center     Atomic     Atomic              Coordinates (Angstroms)
 Number     Number      Type              X           Y           Z
 ---------------------------------------------------------------------
    1          7             0       -0.057677    0.390720   -0.001620
    2          6             0        0.667387   -0.902529    0.002433
    3          1             0       -0.112446   -1.665391    0.004875
    4          6             0        1.499677   -1.098310   -1.269556
    5          1             0        1.939940   -2.098111   -1.270014
    6          1             0        0.878109   -1.002191   -2.161687
    7          1             0        2.302854   -0.365508   -1.324706
    8          6             0       -1.531471    0.400500   -0.001480
    9          1             0       -1.807652    1.457952   -0.005498
   10          6             0       -2.115719   -0.230212   -1.269977
   11          1             0       -1.895048   -1.298002   -1.331789
   12          1             0       -3.202129   -0.119647   -1.276340
   13          1             0       -1.717860    0.253208   -2.163407
   14          6             0        0.618784    1.568882   -0.004448
   15          1             0       -0.062490    2.439913   -0.006941
   16          8             0        1.829487    1.707962   -0.004481
   17          6             0        1.499722   -1.090360    1.275616
   18          1             0        1.939515   -2.090340    1.282589
   19          1             0        2.303140   -0.357506    1.325932
   20          1             0        0.878224   -0.988076    2.167106
   21          6             0       -2.115454   -0.220677    1.271818
   22          1             0       -3.202078   -0.112161    1.276564
   23          1             0       -1.892689   -1.287475    1.342572
   24          1             0       -1.719103    0.270840    2.161495
 ---------------------------------------------------------------------
 Rotational constants (GHZ):      1.9825171      1.2017453      1.1106517
 Standard basis: TZVP (5D, 7F)
 There are   261 symmetry adapted basis functions of A   symmetry.
 Integral buffers will be    131072 words long.
 Raffenetti 2 integral format.
 Two-electron integral symmetry is turned on.
   261 basis functions,   435 primitive gaussians,   270 cartesian basis functions
    36 alpha electrons       36 beta electrons
       nuclear repulsion energy       498.0352634801 Hartrees.
 NAtoms=   24 NActive=   24 NUniq=   24 SFac= 7.50D-01 NAtFMM=   80 NAOKFM=F Big=F
 One-electron integrals computed using PRISM.
 NBasis=   261 RedAO= T  NBF=   261
 NBsUse=   261 1.00D-06 NBFU=   261
 Initial guess read from the read-write file:
 Initial guess orbital symmetries:
       Occupied  (A) (A) (A) (A) (A) (A) (A) (A) (A) (A) (A) (A)
                 (A) (A) (A) (A) (A) (A) (A) (A) (A) (A) (A) (A)
                 (A) (A) (A) (A) (A) (A) (A) (A) (A) (A) (A) (A)
       Virtual   (A) (A) (A) (A) (A) (A) (A) (A) (A) (A) (A) (A)
                 (A) (A) (A) (A) (A) (A) (A) (A) (A) (A) (A) (A)
                 (A) (A) (A) (A) (A) (A) (A) (A) (A) (A) (A) (A)
                 (A) (A) (A) (A) (A) (A) (A) (A) (A) (A) (A) (A)
                 (A) (A) (A) (A) (A) (A) (A) (A) (A) (A) (A) (A)
                 (A) (A) (A) (A) (A) (A) (A) (A) (A) (A) (A) (A)
                 (A) (A) (A) (A) (A) (A) (A) (A) (A) (A) (A) (A)
                 (A) (A) (A) (A) (A) (A) (A) (A) (A) (A) (A) (A)
                 (A) (A) (A) (A) (A) (A) (A) (A) (A) (A) (A) (A)
                 (A) (A) (A) (A) (A) (A) (A) (A) (A) (A) (A) (A)
                 (A) (A) (A) (A) (A) (A) (A) (A) (A) (A) (A) (A)
                 (A) (A) (A) (A) (A) (A) (A) (A) (A) (A) (A) (A)
                 (A) (A) (A) (A) (A) (A) (A) (A) (A) (A) (A) (A)
                 (A) (A) (A) (A) (A) (A) (A) (A) (A) (A) (A) (A)
                 (A) (A) (A) (A) (A) (A) (A) (A) (A) (A) (A) (A)
                 (A) (A) (A) (A) (A) (A) (A) (A) (A) (A) (A) (A)
                 (A) (A) (A) (A) (A) (A) (A) (A) (A) (A) (A) (A)
                 (A) (A) (A) (A) (A) (A) (A) (A) (A) (A) (A) (A)
                 (A) (A) (A) (A) (A) (A) (A) (A) (A)
 Requested convergence on RMS density matrix=1.00D-08 within 128 cycles.
 Requested convergence on MAX density matrix=1.00D-06.
 Requested convergence on             energy=1.00D-06.
 No special actions if energy rises.
 SCF Done:  E(RB+HF-LYP) =  -405.915398720     A.U. after   14 cycles
             Convg  =    0.4320D-08             -V/T =  2.0052
             S**2   =   0.0000
 Range of M.O.s used for correlation:     1   261
 NBasis=   261 NAE=    36 NBE=    36 NFC=     0 NFV=     0
 NROrb=    261 NOA=    36 NOB=    36 NVA=   225 NVB=   225

 **** Warning!!: The largest alpha MO coefficient is  0.20208396D+02

 Symmetrizing basis deriv contribution to polar:
 IMax=3 JMax=2 DiffMx= 0.00D+00
 G2DrvN: will do   25 centers at a time, making    1 passes doing MaxLOS=2.
 FoFDir/FoFCou used for L=0 through L=2.
 DoAtom=TTTTTTTTTTTTTTTTTTTTTTTT
          Differentiating once with respect to electric field.
                with respect to dipole field.
          Differentiating once with respect to nuclear coordinates.
 Integrals replicated using symmetry in FoFDir.
 MinBra= 0 MaxBra= 2 Meth= 1.
 IRaf=       0 NMat=  75 IRICut=      75 DoRegI=T DoRafI=T ISym2E= 2 JSym2E=2.
          There are  75 degrees of freedom in the 1st order CPHF.
    72 vectors were produced by pass  0.
 AX will form  72 AO Fock derivatives at one time.
    72 vectors were produced by pass  1.
    72 vectors were produced by pass  2.
    72 vectors were produced by pass  3.
    72 vectors were produced by pass  4.
    43 vectors were produced by pass  5.
     6 vectors were produced by pass  6.
     3 vectors were produced by pass  7.
 Inv2:  IOpt= 1 Iter= 1 AM= 2.66D-15 Conv= 1.00D-12.
 Inverted reduced A of dimension  412 with in-core refinement.
 Isotropic polarizability for W=    0.000000       94.27 Bohr**3.
 End of Minotr Frequency-dependent properties file   721 does not exist.
 ***** Axes restored to original set *****
 -------------------------------------------------------------------
 Center     Atomic                   Forces (Hartrees/Bohr)
 Number     Number              X              Y              Z
 -------------------------------------------------------------------
    1          7          -0.000002245    0.000006121    0.000024687
    2          6           0.000001025    0.000011156    0.000003383
    3          1           0.000005515   -0.000001513   -0.000001276
    4          6          -0.000000167   -0.000002554    0.000002705
    5          1          -0.000001252   -0.000001258   -0.000000302
    6          1           0.000000320    0.000001169    0.000000645
    7          1          -0.000000928   -0.000000314   -0.000003812
    8          6           0.000002080   -0.000000122   -0.000011618
    9          1           0.000001272    0.000000764    0.000003350
   10          6           0.000002121   -0.000001262   -0.000003364
   11          1          -0.000002745    0.000005486   -0.000000984
   12          1          -0.000000143   -0.000000637    0.000000335
   13          1          -0.000000978   -0.000000089    0.000001502
   14          6          -0.000002112   -0.000002924   -0.000015745
   15          1           0.000000566   -0.000001374    0.000000221
   16          8           0.000000569   -0.000003568   -0.000002237
   17          6          -0.000007246   -0.000000475   -0.000005668
   18          1           0.000001230   -0.000000070   -0.000000638
   19          1           0.000004938   -0.000000045    0.000005641
   20          1           0.000000353   -0.000003168    0.000001491
   21          6           0.000004944   -0.000008996   -0.000001856
   22          1          -0.000000404    0.000002649    0.000002102
   23          1          -0.000010766    0.000002300    0.000003236
   24          1           0.000004055   -0.000001276   -0.000001797
 -------------------------------------------------------------------
 Cartesian Forces:  Max     0.000024687 RMS     0.000004972

 GradGradGradGradGradGradGradGradGradGradGradGradGradGradGradGradGradGrad
 Berny optimization.
 Internal  Forces:  Max     0.000013648 RMS     0.000003582
 Search for a local minimum.
 Step number   3 out of a maximum of 127
 All quantities printed in internal units (Hartrees-Bohrs-Radians)
 Second derivative matrix not updated -- analytic derivatives used.
 Trust test= 1.01D+00 RLast= 1.86D-02 DXMaxT set to 3.00D-01
     Eigenvalues ---    0.00203   0.00225   0.00281   0.00295   0.00462
     Eigenvalues ---    0.00683   0.01149   0.02071   0.04039   0.04158
     Eigenvalues ---    0.04446   0.04509   0.04516   0.04546   0.04585
     Eigenvalues ---    0.04606   0.04679   0.04710   0.05128   0.05357
     Eigenvalues ---    0.05428   0.05472   0.08514   0.11982   0.12055
     Eigenvalues ---    0.12412   0.12415   0.12773   0.13061   0.13190
     Eigenvalues ---    0.13485   0.14555   0.14592   0.14775   0.15035
     Eigenvalues ---    0.15140   0.18390   0.18836   0.19781   0.19932
     Eigenvalues ---    0.22114   0.24059   0.26723   0.27295   0.27630
     Eigenvalues ---    0.28023   0.28960   0.31286   0.32522   0.33311
     Eigenvalues ---    0.33345   0.33357   0.33492   0.33497   0.33552
     Eigenvalues ---    0.33758   0.33785   0.33816   0.34359   0.34469
     Eigenvalues ---    0.34746   0.34780   0.34842   0.38448   0.45230
     Eigenvalues ---    0.806351000.000001000.000001000.000001000.00000
     Eigenvalues --- 1000.000001000.000001000.000001000.000001000.00000
     Eigenvalues --- 1000.000001000.000001000.000001000.000001000.00000
     Eigenvalues --- 1000.000001000.000001000.000001000.000001000.00000
     Eigenvalues --- 1000.000001000.000001000.000001000.000001000.00000
     Eigenvalues --- 1000.000001000.000001000.000001000.000001000.00000
     Eigenvalues --- 1000.000001000.000001000.000001000.000001000.00000
     Eigenvalues --- 1000.000001000.000001000.000001000.000001000.00000
     Eigenvalues --- 1000.000001000.000001000.000001000.000001000.00000
     Eigenvalues --- 1000.000001000.000001000.000001000.000001000.00000
     Eigenvalues --- 1000.000001000.00000
 RFO step:  Lambda=-1.05452470D-07.
 Quintic linear search produced a step of -0.06808.
 Iteration  1 RMS(Cart)=  0.00095151 RMS(Int)=  0.00000047
 Iteration  2 RMS(Cart)=  0.00000057 RMS(Int)=  0.00000001
 Variable       Old X    -DE/DX   Delta X   Delta X   Delta X     New X
                                 (Linear)    (Quad)   (Total)
    R1        2.80179   0.00000   0.00000  -0.00002  -0.00002   2.80177
    R2        2.78513   0.00000   0.00000  -0.00001  -0.00001   2.78511
    R3        2.56730  -0.00001   0.00000  -0.00001  -0.00001   2.56729
    R4        2.06154   0.00000   0.00000   0.00000   0.00000   2.06153
    R5        2.89628   0.00000   0.00000   0.00002   0.00002   2.89629
    R6        2.89631   0.00000   0.00000  -0.00002  -0.00002   2.89630
    R7        2.06442   0.00000   0.00000   0.00000   0.00000   2.06442
    R8        2.06273   0.00000   0.00000   0.00000   0.00000   2.06273
    R9        2.05723   0.00000   0.00000  -0.00001  -0.00001   2.05722
   R10        2.06534   0.00000   0.00000   0.00000   0.00000   2.06534
   R11        2.89580   0.00000   0.00001   0.00000   0.00000   2.89581
   R12        2.89578   0.00000  -0.00001   0.00002   0.00001   2.89579
   R13        2.06378  -0.00001   0.00000  -0.00001  -0.00001   2.06377
   R14        2.06366   0.00000   0.00000   0.00000   0.00000   2.06366
   R15        2.06162   0.00000   0.00000   0.00000   0.00000   2.06162
   R16        2.08970   0.00000   0.00000   0.00000   0.00000   2.08969
   R17        2.30294   0.00000   0.00000   0.00000   0.00000   2.30294
   R18        2.06441   0.00000   0.00000   0.00000   0.00000   2.06442
   R19        2.05719   0.00000  -0.00001   0.00002   0.00002   2.05721
   R20        2.06273   0.00000   0.00000   0.00000   0.00000   2.06273
   R21        2.06365   0.00000   0.00000   0.00001   0.00000   2.06366
   R22        2.06378   0.00000   0.00000  -0.00001  -0.00001   2.06376
   R23        2.06163   0.00000   0.00000  -0.00001  -0.00001   2.06162
    A1        2.08841   0.00001  -0.00001   0.00005   0.00004   2.08845
    A2        2.10940  -0.00001   0.00001  -0.00005  -0.00004   2.10936
    A3        2.08537   0.00000   0.00000   0.00000   0.00000   2.08537
    A4        1.83421   0.00000   0.00000   0.00002   0.00002   1.83424
    A5        1.95489   0.00000   0.00003   0.00005   0.00008   1.95497
    A6        1.95492   0.00000  -0.00005   0.00001  -0.00003   1.95489
    A7        1.87624   0.00000   0.00002  -0.00011  -0.00009   1.87616
    A8        1.87617   0.00000   0.00001  -0.00004  -0.00003   1.87614
    A9        1.95936   0.00000  -0.00001   0.00004   0.00003   1.95939
   A10        1.91357   0.00000  -0.00001  -0.00002  -0.00003   1.91355
   A11        1.93674   0.00000   0.00002  -0.00005  -0.00003   1.93671
   A12        1.93553   0.00000   0.00000   0.00007   0.00007   1.93561
   A13        1.88571   0.00000  -0.00001   0.00000  -0.00001   1.88570
   A14        1.89515   0.00000  -0.00001   0.00004   0.00003   1.89518
   A15        1.89594   0.00000   0.00001  -0.00005  -0.00004   1.89590
   A16        1.83290   0.00000   0.00001  -0.00004  -0.00004   1.83286
   A17        1.95891   0.00000  -0.00002   0.00005   0.00003   1.95895
   A18        1.95895   0.00000   0.00000   0.00003   0.00003   1.95897
   A19        1.87427   0.00000   0.00001   0.00004   0.00006   1.87433
   A20        1.87440   0.00000   0.00000  -0.00008  -0.00008   1.87432
   A21        1.95594   0.00000   0.00000  -0.00001  -0.00001   1.95593
   A22        1.95221   0.00000  -0.00001  -0.00003  -0.00004   1.95218
   A23        1.92032   0.00000   0.00001   0.00002   0.00003   1.92035
   A24        1.93530   0.00000  -0.00001   0.00001   0.00001   1.93531
   A25        1.87516   0.00000   0.00000   0.00000   0.00001   1.87516
   A26        1.88937   0.00000   0.00000  -0.00001  -0.00001   1.88936
   A27        1.88933   0.00000   0.00000   0.00000   0.00000   1.88933
   A28        1.95663   0.00000   0.00000   0.00001   0.00001   1.95664
   A29        2.20638   0.00000   0.00000  -0.00002  -0.00002   2.20636
   A30        2.12018   0.00000   0.00000   0.00001   0.00001   2.12019
   A31        1.91358   0.00000   0.00002  -0.00002   0.00000   1.91358
   A32        1.93551   0.00001  -0.00004   0.00009   0.00005   1.93556
   A33        1.93666   0.00000  -0.00001   0.00002   0.00001   1.93667
   A34        1.89528   0.00000   0.00002  -0.00007  -0.00005   1.89522
   A35        1.88576   0.00000   0.00002  -0.00004  -0.00003   1.88573
   A36        1.89587   0.00000   0.00000   0.00002   0.00002   1.89588
   A37        1.92041   0.00000   0.00000  -0.00007  -0.00007   1.92034
   A38        1.95204   0.00001  -0.00001   0.00014   0.00013   1.95217
   A39        1.93535  -0.00001   0.00001  -0.00003  -0.00003   1.93532
   A40        1.87523  -0.00001   0.00001  -0.00007  -0.00006   1.87517
   A41        1.88934   0.00000   0.00000  -0.00002  -0.00002   1.88933
   A42        1.88931   0.00000   0.00000   0.00004   0.00004   1.88935
    D1        0.00008   0.00000  -0.00029  -0.00010  -0.00039  -0.00030
    D2        2.03199   0.00000  -0.00025  -0.00019  -0.00043   2.03155
    D3       -2.03174   0.00000  -0.00028  -0.00007  -0.00035  -2.03209
    D4        3.14080   0.00001   0.00006   0.00074   0.00080  -3.14158
    D5       -1.11048   0.00000   0.00010   0.00066   0.00075  -1.10973
    D6        1.10898   0.00001   0.00007   0.00077   0.00084   1.10981
    D7       -3.14096   0.00000  -0.00011  -0.00062  -0.00073   3.14149
    D8       -1.11016   0.00000  -0.00010  -0.00057  -0.00067  -1.11083
    D9        1.11125   0.00000  -0.00011  -0.00051  -0.00063   1.11063
   D10        0.00149  -0.00001  -0.00046  -0.00145  -0.00190  -0.00041
   D11        2.03229  -0.00001  -0.00044  -0.00139  -0.00184   2.03046
   D12       -2.02948  -0.00001  -0.00045  -0.00134  -0.00180  -2.03127
   D13       -3.14124   0.00000  -0.00010  -0.00034  -0.00044   3.14151
   D14        0.00044   0.00000  -0.00014  -0.00042  -0.00056  -0.00012
   D15       -0.00052   0.00000   0.00025   0.00050   0.00075   0.00023
   D16        3.14116   0.00000   0.00020   0.00042   0.00062  -3.14140
   D17       -3.04859   0.00000   0.00014   0.00014   0.00028  -3.04831
   D18       -0.96692   0.00000   0.00013   0.00010   0.00023  -0.96669
   D19        1.14196   0.00000   0.00015   0.00006   0.00021   1.14218
   D20       -1.04224   0.00000   0.00016   0.00014   0.00030  -1.04194
   D21        1.03943   0.00000   0.00016   0.00009   0.00025   1.03969
   D22       -3.13487   0.00000   0.00018   0.00005   0.00023  -3.13463
   D23        1.01753   0.00000   0.00018   0.00005   0.00023   1.01776
   D24        3.09920   0.00000   0.00018   0.00001   0.00018   3.09938
   D25       -1.07510   0.00000   0.00020  -0.00004   0.00017  -1.07494
   D26        3.04804   0.00000   0.00009   0.00043   0.00051   3.04855
   D27       -1.14238   0.00000   0.00010   0.00038   0.00048  -1.14190
   D28        0.96636   0.00000   0.00006   0.00047   0.00054   0.96689
   D29        1.04171   0.00000   0.00011   0.00041   0.00052   1.04223
   D30        3.13449   0.00000   0.00012   0.00037   0.00048   3.13497
   D31       -1.03997   0.00000   0.00008   0.00046   0.00054  -1.03942
   D32       -1.01809   0.00000   0.00008   0.00054   0.00062  -1.01747
   D33        1.07468   0.00000   0.00009   0.00050   0.00059   1.07526
   D34       -3.09978   0.00000   0.00006   0.00059   0.00065  -3.09913
   D35        1.15193   0.00000   0.00006  -0.00053  -0.00047   1.15146
   D36       -3.04855   0.00000   0.00006  -0.00053  -0.00046  -3.04901
   D37       -0.95896   0.00000   0.00007  -0.00050  -0.00043  -0.95939
   D38       -3.12551   0.00000   0.00007  -0.00053  -0.00046  -3.12597
   D39       -1.04280   0.00000   0.00007  -0.00053  -0.00046  -1.04325
   D40        1.04679   0.00000   0.00008  -0.00050  -0.00043   1.04637
   D41       -1.07109   0.00000   0.00007  -0.00060  -0.00053  -1.07162
   D42        1.01162   0.00000   0.00007  -0.00060  -0.00053   1.01109
   D43        3.10121   0.00000   0.00008  -0.00057  -0.00050   3.10071
   D44        3.05084  -0.00001   0.00016  -0.00161  -0.00145   3.04939
   D45       -1.14960  -0.00001   0.00017  -0.00165  -0.00148  -1.15108
   D46        0.96113   0.00000   0.00016  -0.00153  -0.00137   0.95977
   D47        1.04500   0.00000   0.00016  -0.00153  -0.00137   1.04363
   D48        3.12774   0.00000   0.00016  -0.00156  -0.00140   3.12634
   D49       -1.04471   0.00000   0.00015  -0.00144  -0.00129  -1.04600
   D50       -1.00934   0.00000   0.00015  -0.00153  -0.00138  -1.01072
   D51        1.07341   0.00000   0.00015  -0.00157  -0.00142   1.07199
   D52       -3.09905   0.00000   0.00014  -0.00144  -0.00130  -3.10035
         Item               Value     Threshold  Converged?
 Maximum Force            0.000014     0.000015     YES
 RMS     Force            0.000004     0.000010     YES
 Maximum Displacement     0.004196     0.000060     NO 
 RMS     Displacement     0.000951     0.000040     NO 
 Predicted change in Energy=-5.776233D-08
 GradGradGradGradGradGradGradGradGradGradGradGradGradGradGradGradGradGrad

                          Input orientation:                          
 ---------------------------------------------------------------------
 Center     Atomic     Atomic              Coordinates (Angstroms)
 Number     Number      Type              X           Y           Z
 ---------------------------------------------------------------------
    1          7             0       -0.057708    0.390434   -0.016338
    2          6             0        0.667633   -0.901654    0.034488
    3          1             0       -0.112014   -1.664081    0.065418
    4          6             0        1.499020   -1.143825   -1.230095
    5          1             0        1.939218   -2.143014   -1.194320
    6          1             0        0.876795   -1.080345   -2.124684
    7          1             0        2.302175   -0.413585   -1.312637
    8          6             0       -1.531496    0.399971   -0.015957
    9          1             0       -1.807827    1.456573   -0.057578
   10          6             0       -2.116182   -0.275748   -1.260859
   11          1             0       -1.894943   -1.344935   -1.284775
   12          1             0       -3.202660   -0.166066   -1.270489
   13          1             0       -1.719119    0.175786   -2.171166
   14          6             0        0.618542    1.567763   -0.063703
   15          1             0       -0.062879    2.438010   -0.097869
   16          8             0        1.829223    1.706893   -0.070071
   17          6             0        1.500888   -1.042596    1.313102
   18          1             0        1.941341   -2.041386    1.356100
   19          1             0        2.303902   -0.307926    1.336279
   20          1             0        0.879885   -0.908424    2.200702
   21          6             0       -2.114908   -0.175349    1.278970
   22          1             0       -3.201412   -0.065539    1.280824
   23          1             0       -1.893285   -1.239235    1.387159
   24          1             0       -1.717245    0.346846    2.150392
 ---------------------------------------------------------------------
                    Distance matrix (angstroms):
                    1          2          3          4          5
     1  N    0.000000
     2  C    1.482631   0.000000
     3  H    2.056858   1.090917   0.000000
     4  C    2.500111   1.532651   2.131771   0.000000
     5  H    3.434197   2.160526   2.454357   1.092444   0.000000
     6  H    2.735253   2.176626   2.472860   1.091551   1.767367
     7  H    2.809962   2.173635   3.048128   1.088633   1.771063
     8  C    1.473819   2.555962   2.506364   3.611297   4.461072
     9  H    2.049700   3.420178   3.553785   4.367162   5.318793
    10  C    2.495986   3.133577   2.775458   3.718089   4.465129
    11  H    2.827697   2.916119   2.259140   3.400356   3.917385
    12  H    3.431226   4.150087   3.685212   4.802440   5.509358
    13  H    2.729404   3.423795   3.312129   3.603249   4.440100
    14  C    1.358551   2.471856   3.315901   3.080328   4.097846
    15  H    2.049205   3.421187   4.105633   4.068292   5.118240
    16  O    2.301403   2.857401   3.892328   3.095364   4.012208
    17  C    2.500041   1.532655   2.131762   2.545211   2.773124
    18  H    3.434171   2.160551   2.454483   2.773025   2.552444
    19  H    2.809712   2.173603   3.048097   2.816529   3.147137
    20  H    2.735211   2.176598   2.472715   3.494154   3.764648
    21  C    2.495998   3.133495   2.774999   4.504867   5.140507
    22  H    3.431242   4.149934   3.684688   5.437047   6.071928
    23  H    2.827537   2.915816   2.258411   4.285657   4.708389
    24  H    2.729594   3.423952   3.311753   4.898382   5.545829
                    6          7          8          9         10
     6  H    0.000000
     7  H    1.770790   0.000000
     8  C    3.526745   4.127989   0.000000
     9  H    4.232739   4.686661   1.092932   0.000000
    10  C    3.217371   4.420810   1.532395   2.131644   0.000000
    11  H    2.908262   4.299301   2.187850   3.059747   1.092098
    12  H    4.267025   5.510558   2.164956   2.459607   1.092043
    13  H    2.884232   4.153942   2.174945   2.472962   1.090963
    14  C    3.365533   2.884475   2.447178   2.428923   3.508622
    15  H    4.167708   3.898812   2.513394   2.002421   3.596260
    16  O    3.591274   2.502815   3.606301   3.645676   4.573299
    17  C    3.494179   2.816421   3.611475   4.367174   4.505166
    18  H    3.764666   3.146760   4.461319   5.318879   5.140957
    19  H    3.822503   2.651024   4.127946   4.686428   5.126724
    20  H    4.328802   3.822477   3.527072   4.232828   4.621591
    21  C    4.621057   5.126774   1.532383   2.131626   2.541813
    22  H    5.409167   6.093985   2.164939   2.459720   2.771654
    23  H    4.475671   5.056925   2.187835   3.059730   2.826657
    24  H    5.200211   5.359717   2.174947   2.472819   3.490474
                   11         12         13         14         15
    11  H    0.000000
    12  H    1.760698   0.000000
    13  H    1.768952   1.768891   0.000000
    14  C    4.036389   4.366243   3.441462   0.000000
    15  H    4.367594   4.244346   3.487026   1.105817   0.000000
    16  O    4.965740   5.501711   4.398820   1.218666   2.028634
    17  C    4.286262   5.437518   4.898267   3.080276   4.068271
    18  H    4.709176   6.072606   5.545847   4.097755   5.118195
    19  H    5.057234   6.094061   5.359183   2.884198   3.898538
    20  H    4.476468   5.409938   5.200343   3.365610   4.167836
    21  C    2.826501   2.771828   3.490470   3.508983   3.596687
    22  H    3.150558   2.553293   3.764527   4.366633   4.244873
    23  H    2.674025   3.151071   3.833314   4.036522   4.367817
    24  H    3.833285   3.764567   4.324943   3.442203   3.487775
                   16         17         18         19         20
    16  O    0.000000
    17  C    3.095264   0.000000
    18  H    4.011998   1.092442   0.000000
    19  H    2.502526   1.088627   1.771081   0.000000
    20  H    3.591314   1.091550   1.767385   1.770776   0.000000
    21  C    4.573720   3.718503   4.465558   4.421170   3.218039
    22  H    5.502156   4.802844   5.509769   5.510926   4.267742
    23  H    4.965909   3.400670   3.917751   4.299570   2.908910
    24  H    4.399730   3.603884   4.440699   4.154651   2.885016
                   21         22         23         24
    21  C    0.000000
    22  H    1.092041   0.000000
    23  H    1.092096   1.760700   0.000000
    24  H    1.090963   1.768888   1.768945   0.000000
 Stoichiometry    C7H15NO
 Framework group  C1[X(C7H15NO)]
 Deg. of freedom    66
 Full point group                 C1
 Largest Abelian subgroup         C1      NOp   1
 Largest concise Abelian subgroup C1      NOp   1
                         Standard orientation:                         
 ---------------------------------------------------------------------
 Center     Atomic     Atomic              Coordinates (Angstroms)
 Number     Number      Type              X           Y           Z
 ---------------------------------------------------------------------
    1          7             0        0.057684    0.390711   -0.000336
    2          6             0       -0.667452   -0.902491    0.000236
    3          1             0        0.112317   -1.665421    0.000310
    4          6             0       -1.499519   -1.093940    1.273040
    5          1             0       -1.939560   -2.093830    1.277076
    6          1             0       -0.877808   -0.994574    2.164715
    7          1             0       -2.302821   -0.361107    1.325814
    8          6             0        1.531471    0.400460   -0.000276
    9          1             0        1.807634    1.457925   -0.000862
   10          6             0        2.115546   -0.224752    1.271023
   11          1             0        1.894440   -1.292157    1.337629
   12          1             0        3.202003   -0.114599    1.276858
   13          1             0        1.717908    0.262823    2.162289
   14          6             0       -0.618754    1.568885   -0.000551
   15          1             0        0.062529    2.439911   -0.000895
   16          8             0       -1.829457    1.707965   -0.000438
   17          6             0       -1.499965   -1.094675   -1.272171
   18          1             0       -1.940258   -2.094456   -1.275367
   19          1             0       -2.303066   -0.361651   -1.325209
   20          1             0       -0.878480   -0.996069   -2.164087
   21          6             0        2.115692   -0.226181   -1.270790
   22          1             0        3.202182   -0.116361   -1.276434
   23          1             0        1.894276   -1.293582   -1.336396
   24          1             0        1.718450    0.260621   -2.162654
 ---------------------------------------------------------------------
 Rotational constants (GHZ):      1.9825321      1.2017198      1.1106421
 Standard basis: TZVP (5D, 7F)
 There are   261 symmetry adapted basis functions of A   symmetry.
 Integral buffers will be    131072 words long.
 Raffenetti 2 integral format.
 Two-electron integral symmetry is turned on.
   261 basis functions,   435 primitive gaussians,   270 cartesian basis functions
    36 alpha electrons       36 beta electrons
       nuclear repulsion energy       498.0339734959 Hartrees.
 NAtoms=   24 NActive=   24 NUniq=   24 SFac= 7.50D-01 NAtFMM=   80 NAOKFM=F Big=F
 One-electron integrals computed using PRISM.
 NBasis=   261 RedAO= T  NBF=   261
 NBsUse=   261 1.00D-06 NBFU=   261
 Initial guess read from the read-write file:
 Initial guess orbital symmetries:
       Occupied  (A) (A) (A) (A) (A) (A) (A) (A) (A) (A) (A) (A)
                 (A) (A) (A) (A) (A) (A) (A) (A) (A) (A) (A) (A)
                 (A) (A) (A) (A) (A) (A) (A) (A) (A) (A) (A) (A)
       Virtual   (A) (A) (A) (A) (A) (A) (A) (A) (A) (A) (A) (A)
                 (A) (A) (A) (A) (A) (A) (A) (A) (A) (A) (A) (A)
                 (A) (A) (A) (A) (A) (A) (A) (A) (A) (A) (A) (A)
                 (A) (A) (A) (A) (A) (A) (A) (A) (A) (A) (A) (A)
                 (A) (A) (A) (A) (A) (A) (A) (A) (A) (A) (A) (A)
                 (A) (A) (A) (A) (A) (A) (A) (A) (A) (A) (A) (A)
                 (A) (A) (A) (A) (A) (A) (A) (A) (A) (A) (A) (A)
                 (A) (A) (A) (A) (A) (A) (A) (A) (A) (A) (A) (A)
                 (A) (A) (A) (A) (A) (A) (A) (A) (A) (A) (A) (A)
                 (A) (A) (A) (A) (A) (A) (A) (A) (A) (A) (A) (A)
                 (A) (A) (A) (A) (A) (A) (A) (A) (A) (A) (A) (A)
                 (A) (A) (A) (A) (A) (A) (A) (A) (A) (A) (A) (A)
                 (A) (A) (A) (A) (A) (A) (A) (A) (A) (A) (A) (A)
                 (A) (A) (A) (A) (A) (A) (A) (A) (A) (A) (A) (A)
                 (A) (A) (A) (A) (A) (A) (A) (A) (A) (A) (A) (A)
                 (A) (A) (A) (A) (A) (A) (A) (A) (A) (A) (A) (A)
                 (A) (A) (A) (A) (A) (A) (A) (A) (A) (A) (A) (A)
                 (A) (A) (A) (A) (A) (A) (A) (A) (A) (A) (A) (A)
                 (A) (A) (A) (A) (A) (A) (A) (A) (A)
 Requested convergence on RMS density matrix=1.00D-08 within 128 cycles.
 Requested convergence on MAX density matrix=1.00D-06.
 Requested convergence on             energy=1.00D-06.
 No special actions if energy rises.
 SCF Done:  E(RB+HF-LYP) =  -405.915398762     A.U. after   14 cycles
             Convg  =    0.4320D-08             -V/T =  2.0052
             S**2   =   0.0000
 Range of M.O.s used for correlation:     1   261
 NBasis=   261 NAE=    36 NBE=    36 NFC=     0 NFV=     0
 NROrb=    261 NOA=    36 NOB=    36 NVA=   225 NVB=   225

 **** Warning!!: The largest alpha MO coefficient is  0.20205927D+02

 Symmetrizing basis deriv contribution to polar:
 IMax=3 JMax=2 DiffMx= 0.00D+00
 G2DrvN: will do   25 centers at a time, making    1 passes doing MaxLOS=2.
 FoFDir/FoFCou used for L=0 through L=2.
 DoAtom=TTTTTTTTTTTTTTTTTTTTTTTT
          Differentiating once with respect to electric field.
                with respect to dipole field.
          Differentiating once with respect to nuclear coordinates.
 Integrals replicated using symmetry in FoFDir.
 MinBra= 0 MaxBra= 2 Meth= 1.
 IRaf=       0 NMat=  75 IRICut=      75 DoRegI=T DoRafI=T ISym2E= 2 JSym2E=2.
          There are  75 degrees of freedom in the 1st order CPHF.
    72 vectors were produced by pass  0.
 AX will form  72 AO Fock derivatives at one time.
    72 vectors were produced by pass  1.
    72 vectors were produced by pass  2.
    72 vectors were produced by pass  3.
    72 vectors were produced by pass  4.
    43 vectors were produced by pass  5.
     6 vectors were produced by pass  6.
     2 vectors were produced by pass  7.
 Inv2:  IOpt= 1 Iter= 1 AM= 2.80D-15 Conv= 1.00D-12.
 Inverted reduced A of dimension  411 with in-core refinement.
 Isotropic polarizability for W=    0.000000       94.27 Bohr**3.
 End of Minotr Frequency-dependent properties file   721 does not exist.
 ***** Axes restored to original set *****
 -------------------------------------------------------------------
 Center     Atomic                   Forces (Hartrees/Bohr)
 Number     Number              X              Y              Z
 -------------------------------------------------------------------
    1          7           0.000000185   -0.000000094   -0.000005872
    2          6          -0.000000087    0.000000388    0.000006097
    3          1          -0.000000141   -0.000000175   -0.000002677
    4          6           0.000002645   -0.000000900   -0.000001252
    5          1          -0.000000414   -0.000000515    0.000000446
    6          1          -0.000000069    0.000001099    0.000001377
    7          1          -0.000002890    0.000000639    0.000000113
    8          6           0.000000170    0.000000070   -0.000004221
    9          1           0.000000390    0.000000280   -0.000001435
   10          6          -0.000001631    0.000000138    0.000001941
   11          1           0.000001685    0.000000484   -0.000000005
   12          1           0.000000350    0.000000320    0.000000257
   13          1          -0.000001199    0.000000160   -0.000000164
   14          6           0.000000268   -0.000000062    0.000004546
   15          1           0.000000543   -0.000000091   -0.000000441
   16          8           0.000000403   -0.000000583   -0.000001735
   17          6          -0.000003218    0.000000017   -0.000001584
   18          1          -0.000000318   -0.000000348    0.000000433
   19          1           0.000002996   -0.000001630    0.000000526
   20          1          -0.000000212   -0.000001453    0.000001508
   21          6           0.000001745    0.000000565    0.000001975
   22          1          -0.000000284    0.000000886    0.000000249
   23          1          -0.000002352    0.000000387    0.000000145
   24          1           0.000001435    0.000000418   -0.000000227
 -------------------------------------------------------------------
 Cartesian Forces:  Max     0.000006097 RMS     0.000001679

 GradGradGradGradGradGradGradGradGradGradGradGradGradGradGradGradGradGrad
 Berny optimization.
 Internal  Forces:  Max     0.000005255 RMS     0.000001445
 Search for a local minimum.
 Step number   4 out of a maximum of 127
 All quantities printed in internal units (Hartrees-Bohrs-Radians)
 Second derivative matrix not updated -- analytic derivatives used.
 Trust test= 7.29D-01 RLast= 6.16D-03 DXMaxT set to 3.00D-01
     Eigenvalues ---    0.00203   0.00225   0.00281   0.00295   0.00462
     Eigenvalues ---    0.00684   0.01149   0.02071   0.04039   0.04158
     Eigenvalues ---    0.04446   0.04509   0.04516   0.04546   0.04585
     Eigenvalues ---    0.04606   0.04679   0.04710   0.05128   0.05358
     Eigenvalues ---    0.05429   0.05472   0.08514   0.11982   0.12055
     Eigenvalues ---    0.12412   0.12415   0.12773   0.13061   0.13191
     Eigenvalues ---    0.13485   0.14555   0.14592   0.14775   0.15035
     Eigenvalues ---    0.15140   0.18390   0.18837   0.19782   0.19932
     Eigenvalues ---    0.22115   0.24059   0.26723   0.27296   0.27630
     Eigenvalues ---    0.28023   0.28960   0.31287   0.32522   0.33310
     Eigenvalues ---    0.33346   0.33357   0.33493   0.33497   0.33552
     Eigenvalues ---    0.33759   0.33784   0.33816   0.34360   0.34469
     Eigenvalues ---    0.34746   0.34779   0.34842   0.38450   0.45232
     Eigenvalues ---    0.806351000.000001000.000001000.000001000.00000
     Eigenvalues --- 1000.000001000.000001000.000001000.000001000.00000
     Eigenvalues --- 1000.000001000.000001000.000001000.000001000.00000
     Eigenvalues --- 1000.000001000.000001000.000001000.000001000.00000
     Eigenvalues --- 1000.000001000.000001000.000001000.000001000.00000
     Eigenvalues --- 1000.000001000.000001000.000001000.000001000.00000
     Eigenvalues --- 1000.000001000.000001000.000001000.000001000.00000
     Eigenvalues --- 1000.000001000.000001000.000001000.000001000.00000
     Eigenvalues --- 1000.000001000.000001000.000001000.000001000.00000
     Eigenvalues --- 1000.000001000.000001000.000001000.000001000.00000
     Eigenvalues --- 1000.000001000.00000
 RFO step:  Lambda= 0.00000000D+00.
 Quintic linear search produced a step of -0.06862.
 Iteration  1 RMS(Cart)=  0.00027096 RMS(Int)=  0.00000002
 Iteration  2 RMS(Cart)=  0.00000003 RMS(Int)=  0.00000000
 Variable       Old X    -DE/DX   Delta X   Delta X   Delta X     New X
                                 (Linear)    (Quad)   (Total)
    R1        2.80177   0.00000   0.00000   0.00000   0.00000   2.80177
    R2        2.78511   0.00000   0.00000   0.00000   0.00000   2.78511
    R3        2.56729   0.00000   0.00000   0.00000   0.00000   2.56729
    R4        2.06153   0.00000   0.00000   0.00000   0.00000   2.06153
    R5        2.89629   0.00000   0.00000   0.00000   0.00000   2.89629
    R6        2.89630   0.00000   0.00000   0.00000   0.00000   2.89629
    R7        2.06442   0.00000   0.00000   0.00000   0.00000   2.06442
    R8        2.06273   0.00000   0.00000   0.00000   0.00000   2.06273
    R9        2.05722   0.00000   0.00000  -0.00001  -0.00001   2.05721
   R10        2.06534   0.00000   0.00000   0.00000   0.00000   2.06534
   R11        2.89581   0.00000   0.00000  -0.00001  -0.00001   2.89580
   R12        2.89579   0.00000   0.00000   0.00001   0.00001   2.89580
   R13        2.06377   0.00000   0.00000   0.00000   0.00000   2.06376
   R14        2.06366   0.00000   0.00000   0.00000   0.00000   2.06366
   R15        2.06162   0.00000   0.00000   0.00000   0.00000   2.06162
   R16        2.08969   0.00000   0.00000   0.00000   0.00000   2.08969
   R17        2.30294   0.00000   0.00000   0.00000   0.00000   2.30294
   R18        2.06442   0.00000   0.00000   0.00000   0.00000   2.06442
   R19        2.05721   0.00000   0.00000   0.00001   0.00001   2.05721
   R20        2.06273   0.00000   0.00000   0.00000   0.00000   2.06273
   R21        2.06366   0.00000   0.00000   0.00000   0.00000   2.06366
   R22        2.06376   0.00000   0.00000   0.00000   0.00000   2.06376
   R23        2.06162   0.00000   0.00000   0.00000   0.00000   2.06162
    A1        2.08845   0.00000   0.00000   0.00000   0.00000   2.08845
    A2        2.10936   0.00000   0.00000   0.00000   0.00000   2.10936
    A3        2.08537   0.00000   0.00000   0.00000   0.00000   2.08537
    A4        1.83424   0.00000   0.00000   0.00000   0.00000   1.83424
    A5        1.95497  -0.00001  -0.00001  -0.00004  -0.00005   1.95493
    A6        1.95489   0.00001   0.00000   0.00005   0.00005   1.95493
    A7        1.87616   0.00000   0.00001  -0.00002  -0.00001   1.87615
    A8        1.87614   0.00000   0.00000   0.00000   0.00001   1.87615
    A9        1.95939   0.00000   0.00000   0.00000   0.00000   1.95939
   A10        1.91355   0.00000   0.00000   0.00001   0.00002   1.91356
   A11        1.93671   0.00000   0.00000  -0.00002  -0.00002   1.93669
   A12        1.93561   0.00000  -0.00001  -0.00002  -0.00002   1.93559
   A13        1.88570   0.00000   0.00000   0.00002   0.00002   1.88572
   A14        1.89518   0.00000   0.00000   0.00002   0.00002   1.89520
   A15        1.89590   0.00000   0.00000  -0.00001  -0.00001   1.89589
   A16        1.83286   0.00000   0.00000   0.00000   0.00000   1.83286
   A17        1.95895   0.00000   0.00000   0.00002   0.00001   1.95896
   A18        1.95897   0.00000   0.00000  -0.00001  -0.00001   1.95896
   A19        1.87433   0.00000   0.00000   0.00000  -0.00001   1.87432
   A20        1.87432   0.00000   0.00001   0.00000   0.00001   1.87432
   A21        1.95593   0.00000   0.00000   0.00000   0.00000   1.95593
   A22        1.95218   0.00000   0.00000   0.00000   0.00000   1.95217
   A23        1.92035   0.00000   0.00000   0.00000   0.00000   1.92035
   A24        1.93531   0.00000   0.00000   0.00001   0.00001   1.93531
   A25        1.87516   0.00000   0.00000   0.00000   0.00000   1.87516
   A26        1.88936   0.00000   0.00000  -0.00001   0.00000   1.88935
   A27        1.88933   0.00000   0.00000   0.00000   0.00000   1.88933
   A28        1.95664   0.00000   0.00000   0.00000   0.00000   1.95664
   A29        2.20636   0.00000   0.00000   0.00000   0.00000   2.20636
   A30        2.12019   0.00000   0.00000   0.00000   0.00000   2.12019
   A31        1.91358   0.00000   0.00000  -0.00002  -0.00002   1.91356
   A32        1.93556   0.00000   0.00000   0.00003   0.00002   1.93559
   A33        1.93667   0.00000   0.00000   0.00002   0.00002   1.93669
   A34        1.89522   0.00000   0.00000  -0.00002  -0.00002   1.89520
   A35        1.88573   0.00000   0.00000  -0.00002  -0.00002   1.88571
   A36        1.89588   0.00000   0.00000   0.00001   0.00001   1.89589
   A37        1.92034   0.00000   0.00000   0.00000   0.00000   1.92035
   A38        1.95217   0.00000  -0.00001   0.00001   0.00000   1.95217
   A39        1.93532   0.00000   0.00000  -0.00001  -0.00001   1.93531
   A40        1.87517   0.00000   0.00000  -0.00001   0.00000   1.87516
   A41        1.88933   0.00000   0.00000   0.00000   0.00000   1.88933
   A42        1.88935   0.00000   0.00000   0.00001   0.00000   1.88935
    D1       -0.00030   0.00000   0.00003   0.00030   0.00032   0.00002
    D2        2.03155   0.00000   0.00003   0.00026   0.00029   2.03184
    D3       -2.03209   0.00000   0.00002   0.00027   0.00029  -2.03180
    D4       -3.14158   0.00000  -0.00005   0.00003  -0.00002   3.14158
    D5       -1.10973   0.00000  -0.00005   0.00000  -0.00006  -1.10978
    D6        1.10981   0.00000  -0.00006   0.00000  -0.00005   1.10976
    D7        3.14149   0.00000   0.00005   0.00007   0.00012  -3.14158
    D8       -1.11083   0.00000   0.00005   0.00007   0.00011  -1.11071
    D9        1.11063   0.00000   0.00004   0.00007   0.00012   1.11074
   D10       -0.00041   0.00000   0.00013   0.00033   0.00046   0.00005
   D11        2.03046   0.00000   0.00013   0.00033   0.00045   2.03091
   D12       -2.03127   0.00000   0.00012   0.00033   0.00046  -2.03082
   D13        3.14151   0.00000   0.00003   0.00006   0.00009  -3.14158
   D14       -0.00012   0.00000   0.00004   0.00010   0.00014   0.00001
   D15        0.00023   0.00000  -0.00005  -0.00020  -0.00025  -0.00002
   D16       -3.14140   0.00000  -0.00004  -0.00017  -0.00021   3.14157
   D17       -3.04831   0.00000  -0.00002  -0.00011  -0.00013  -3.04844
   D18       -0.96669   0.00000  -0.00002  -0.00010  -0.00012  -0.96680
   D19        1.14218   0.00000  -0.00001  -0.00014  -0.00015   1.14202
   D20       -1.04194   0.00000  -0.00002  -0.00014  -0.00016  -1.04210
   D21        1.03969   0.00000  -0.00002  -0.00013  -0.00015   1.03954
   D22       -3.13463   0.00000  -0.00002  -0.00017  -0.00018  -3.13482
   D23        1.01776   0.00000  -0.00002  -0.00014  -0.00016   1.01760
   D24        3.09938   0.00000  -0.00001  -0.00013  -0.00014   3.09924
   D25       -1.07494   0.00000  -0.00001  -0.00017  -0.00018  -1.07512
   D26        3.04855   0.00000  -0.00004  -0.00010  -0.00013   3.04841
   D27       -1.14190   0.00000  -0.00003  -0.00012  -0.00016  -1.14205
   D28        0.96689   0.00000  -0.00004  -0.00008  -0.00012   0.96678
   D29        1.04223   0.00000  -0.00004  -0.00013  -0.00016   1.04207
   D30        3.13497   0.00000  -0.00003  -0.00015  -0.00019   3.13478
   D31       -1.03942   0.00000  -0.00004  -0.00011  -0.00015  -1.03957
   D32       -1.01747   0.00000  -0.00004  -0.00011  -0.00016  -1.01763
   D33        1.07526   0.00000  -0.00004  -0.00014  -0.00018   1.07509
   D34       -3.09913   0.00000  -0.00004  -0.00009  -0.00014  -3.09927
   D35        1.15146   0.00000   0.00003  -0.00021  -0.00018   1.15128
   D36       -3.04901   0.00000   0.00003  -0.00021  -0.00018  -3.04919
   D37       -0.95939   0.00000   0.00003  -0.00021  -0.00018  -0.95957
   D38       -3.12597   0.00000   0.00003  -0.00021  -0.00018  -3.12615
   D39       -1.04325   0.00000   0.00003  -0.00021  -0.00018  -1.04343
   D40        1.04637   0.00000   0.00003  -0.00021  -0.00018   1.04619
   D41       -1.07162   0.00000   0.00004  -0.00021  -0.00018  -1.07180
   D42        1.01109   0.00000   0.00004  -0.00021  -0.00018   1.01092
   D43        3.10071   0.00000   0.00003  -0.00021  -0.00018   3.10054
   D44        3.04939   0.00000   0.00010  -0.00027  -0.00017   3.04922
   D45       -1.15108   0.00000   0.00010  -0.00028  -0.00018  -1.15125
   D46        0.95977   0.00000   0.00009  -0.00027  -0.00017   0.95959
   D47        1.04363   0.00000   0.00009  -0.00026  -0.00017   1.04346
   D48        3.12634   0.00000   0.00010  -0.00027  -0.00017   3.12617
   D49       -1.04600   0.00000   0.00009  -0.00026  -0.00017  -1.04617
   D50       -1.01072   0.00000   0.00009  -0.00026  -0.00017  -1.01089
   D51        1.07199   0.00000   0.00010  -0.00026  -0.00017   1.07182
   D52       -3.10035   0.00000   0.00009  -0.00025  -0.00016  -3.10051
         Item               Value     Threshold  Converged?
 Maximum Force            0.000005     0.000015     YES
 RMS     Force            0.000001     0.000010     YES
 Maximum Displacement     0.000744     0.000060     NO 
 RMS     Displacement     0.000271     0.000040     NO 
 Predicted change in Energy=-5.383585D-09
 GradGradGradGradGradGradGradGradGradGradGradGradGradGradGradGradGradGrad

                          Input orientation:                          
 ---------------------------------------------------------------------
 Center     Atomic     Atomic              Coordinates (Angstroms)
 Number     Number      Type              X           Y           Z
 ---------------------------------------------------------------------
    1          7             0       -0.057708    0.390426   -0.016533
    2          6             0        0.667634   -0.901659    0.034330
    3          1             0       -0.112012   -1.664096    0.065024
    4          6             0        1.499233   -1.143668   -1.230147
    5          1             0        1.939570   -2.142795   -1.194365
    6          1             0        0.877109   -1.080218   -2.124808
    7          1             0        2.302278   -0.413294   -1.312540
    8          6             0       -1.531496    0.399967   -0.016050
    9          1             0       -1.807827    1.456562   -0.057844
   10          6             0       -2.116289   -0.275970   -1.260776
   11          1             0       -1.894906   -1.345127   -1.284608
   12          1             0       -3.202783   -0.166437   -1.270236
   13          1             0       -1.719443    0.175511   -2.171203
   14          6             0        0.618542    1.567766   -0.063622
   15          1             0       -0.062879    2.438014   -0.097762
   16          8             0        1.829223    1.706902   -0.069830
   17          6             0        1.500675   -1.042757    1.313064
   18          1             0        1.940988   -2.041609    1.356072
   19          1             0        2.303801   -0.308209    1.336407
   20          1             0        0.879569   -0.908563    2.200589
   21          6             0       -2.114801   -0.175120    1.279036
   22          1             0       -3.201290   -0.065156    1.281043
   23          1             0       -1.893317   -1.239026    1.387319
   24          1             0       -1.716928    0.347125    2.150332
 ---------------------------------------------------------------------
                    Distance matrix (angstroms):
                    1          2          3          4          5
     1  N    0.000000
     2  C    1.482631   0.000000
     3  H    2.056858   1.090917   0.000000
     4  C    2.500074   1.532653   2.131766   0.000000
     5  H    3.434183   2.160539   2.454425   1.092443   0.000000
     6  H    2.735233   2.176611   2.472779   1.091550   1.767376
     7  H    2.809828   2.173619   3.048112   1.088630   1.771072
     8  C    1.473819   2.555962   2.506365   3.611393   4.461206
     9  H    2.049700   3.420177   3.553786   4.367166   5.318837
    10  C    2.495993   3.133531   2.775206   3.718311   4.465360
    11  H    2.827624   2.915968   2.258752   3.400549   3.917604
    12  H    3.431233   4.150008   3.684938   4.802660   5.509586
    13  H    2.729497   3.423858   3.311903   3.603567   4.440397
    14  C    1.358551   2.471855   3.315900   3.080304   4.097799
    15  H    2.049205   3.421187   4.105633   4.068284   5.118217
    16  O    2.301403   2.857399   3.892327   3.095315   4.012096
    17  C    2.500079   1.532653   2.131766   2.545212   2.773068
    18  H    3.434185   2.160537   2.454411   2.773081   2.552444
    19  H    2.809851   2.173621   3.048113   2.816473   3.146930
    20  H    2.735231   2.176613   2.472792   3.494168   3.764657
    21  C    2.495992   3.133544   2.775255   4.505034   5.140757
    22  H    3.431235   4.150013   3.684963   5.437296   6.072287
    23  H    2.827610   2.915968   2.258805   4.285980   4.708812
    24  H    2.729504   3.423897   3.311990   4.898346   5.545870
                    6          7          8          9         10
     6  H    0.000000
     7  H    1.770783   0.000000
     8  C    3.526923   4.127966   0.000000
     9  H    4.232785   4.686532   1.092932   0.000000
    10  C    3.217732   4.421004   1.532389   2.131634   0.000000
    11  H    2.908639   4.299470   2.187843   3.059738   1.092097
    12  H    4.267412   5.510755   2.164946   2.459658   1.092042
    13  H    2.884629   4.154302   2.174946   2.472891   1.090963
    14  C    3.365585   2.884330   2.447178   2.428923   3.508823
    15  H    4.167787   3.898667   2.513395   2.002420   3.596499
    16  O    3.591307   2.502666   3.606301   3.645675   4.573533
    17  C    3.494166   2.816485   3.611379   4.367169   4.505002
    18  H    3.764656   3.146972   4.461184   5.318832   5.140708
    19  H    3.822493   2.651031   4.127973   4.686559   5.126753
    20  H    4.328802   3.822495   3.526893   4.232781   4.621297
    21  C    4.621350   5.126752   1.532390   2.131636   2.541814
    22  H    5.409576   6.094025   2.164949   2.459672   2.771735
    23  H    4.476105   5.057084   2.187843   3.059739   2.826589
    24  H    5.200304   5.359453   2.174946   2.472885   3.490472
                   11         12         13         14         15
    11  H    0.000000
    12  H    1.760699   0.000000
    13  H    1.768948   1.768889   0.000000
    14  C    4.036480   4.366451   3.441866   0.000000
    15  H    4.367733   4.244627   3.487447   1.105817   0.000000
    16  O    4.965854   5.501950   4.399313   1.218666   2.028634
    17  C    4.285941   5.437268   4.898311   3.080301   4.068279
    18  H    4.708754   6.072244   5.545813   4.097803   5.118217
    19  H    5.057080   6.094026   5.359459   2.884348   3.898687
    20  H    4.476036   5.409526   5.200254   3.365560   4.167758
    21  C    2.826578   2.771744   3.490473   3.508782   3.596447
    22  H    3.150799   2.553289   3.764545   4.366426   4.244596
    23  H    2.674034   3.150833   3.833305   4.036428   4.367677
    24  H    3.833302   3.764544   4.324942   3.441799   3.487353
                   16         17         18         19         20
    16  O    0.000000
    17  C    3.095312   0.000000
    18  H    4.012109   1.092443   0.000000
    19  H    2.502678   1.088630   1.771071   0.000000
    20  H    3.591281   1.091550   1.767375   1.770783   0.000000
    21  C    4.573486   3.718281   4.465327   4.420978   3.217678
    22  H    5.501919   4.802625   5.509540   5.510733   4.267354
    23  H    4.965791   3.400473   3.917527   4.299397   2.908524
    24  H    4.399239   3.603576   4.440411   4.154299   2.884627
                   21         22         23         24
    21  C    0.000000
    22  H    1.092042   0.000000
    23  H    1.092097   1.760699   0.000000
    24  H    1.090963   1.768889   1.768948   0.000000
 Stoichiometry    C7H15NO
 Framework group  C1[X(C7H15NO)]
 Deg. of freedom    66
 Full point group                 C1
 Largest Abelian subgroup         C1      NOp   1
 Largest concise Abelian subgroup C1      NOp   1
                         Standard orientation:                         
 ---------------------------------------------------------------------
 Center     Atomic     Atomic              Coordinates (Angstroms)
 Number     Number      Type              X           Y           Z
 ---------------------------------------------------------------------
    1          7             0       -0.057684    0.390711   -0.000043
    2          6             0        0.667453   -0.902490    0.000045
    3          1             0       -0.112314   -1.665421    0.000077
    4          6             0        1.499760   -1.094379   -1.272539
    5          1             0        1.939940   -2.094209   -1.276086
    6          1             0        0.878169   -0.995459   -2.164347
    7          1             0        2.302952   -0.361442   -1.325486
    8          6             0       -1.531471    0.400459   -0.000038
    9          1             0       -1.807634    1.457924   -0.000128
   10          6             0       -2.115626   -0.225575   -1.270888
   11          1             0       -1.894374   -1.292986   -1.336902
   12          1             0       -3.202099   -0.115581   -1.276634
   13          1             0       -1.718185    0.261534   -2.162496
   14          6             0        0.618753    1.568885   -0.000091
   15          1             0       -0.062530    2.439911   -0.000145
   16          8             0        1.829456    1.707965   -0.000083
   17          6             0        1.499725   -1.094236    1.272673
   18          1             0        1.939878   -2.094078    1.276357
   19          1             0        2.302937   -0.361316    1.325545
   20          1             0        0.878118   -0.995187    2.164455
   21          6             0       -2.115613   -0.225359    1.270926
   22          1             0       -3.202088   -0.115388    1.276655
   23          1             0       -1.894336   -1.292753    1.337131
   24          1             0       -1.718180    0.261918    2.162446
 ---------------------------------------------------------------------
 Rotational constants (GHZ):      1.9825320      1.2017194      1.1106421
 Standard basis: TZVP (5D, 7F)
 There are   261 symmetry adapted basis functions of A   symmetry.
 Integral buffers will be    131072 words long.
 Raffenetti 2 integral format.
 Two-electron integral symmetry is turned on.
   261 basis functions,   435 primitive gaussians,   270 cartesian basis functions
    36 alpha electrons       36 beta electrons
       nuclear repulsion energy       498.0339510299 Hartrees.
 NAtoms=   24 NActive=   24 NUniq=   24 SFac= 7.50D-01 NAtFMM=   80 NAOKFM=F Big=F
 One-electron integrals computed using PRISM.
 NBasis=   261 RedAO= T  NBF=   261
 NBsUse=   261 1.00D-06 NBFU=   261
 Initial guess read from the read-write file:
 Initial guess orbital symmetries:
       Occupied  (A) (A) (A) (A) (A) (A) (A) (A) (A) (A) (A) (A)
                 (A) (A) (A) (A) (A) (A) (A) (A) (A) (A) (A) (A)
                 (A) (A) (A) (A) (A) (A) (A) (A) (A) (A) (A) (A)
       Virtual   (A) (A) (A) (A) (A) (A) (A) (A) (A) (A) (A) (A)
                 (A) (A) (A) (A) (A) (A) (A) (A) (A) (A) (A) (A)
                 (A) (A) (A) (A) (A) (A) (A) (A) (A) (A) (A) (A)
                 (A) (A) (A) (A) (A) (A) (A) (A) (A) (A) (A) (A)
                 (A) (A) (A) (A) (A) (A) (A) (A) (A) (A) (A) (A)
                 (A) (A) (A) (A) (A) (A) (A) (A) (A) (A) (A) (A)
                 (A) (A) (A) (A) (A) (A) (A) (A) (A) (A) (A) (A)
                 (A) (A) (A) (A) (A) (A) (A) (A) (A) (A) (A) (A)
                 (A) (A) (A) (A) (A) (A) (A) (A) (A) (A) (A) (A)
                 (A) (A) (A) (A) (A) (A) (A) (A) (A) (A) (A) (A)
                 (A) (A) (A) (A) (A) (A) (A) (A) (A) (A) (A) (A)
                 (A) (A) (A) (A) (A) (A) (A) (A) (A) (A) (A) (A)
                 (A) (A) (A) (A) (A) (A) (A) (A) (A) (A) (A) (A)
                 (A) (A) (A) (A) (A) (A) (A) (A) (A) (A) (A) (A)
                 (A) (A) (A) (A) (A) (A) (A) (A) (A) (A) (A) (A)
                 (A) (A) (A) (A) (A) (A) (A) (A) (A) (A) (A) (A)
                 (A) (A) (A) (A) (A) (A) (A) (A) (A) (A) (A) (A)
                 (A) (A) (A) (A) (A) (A) (A) (A) (A) (A) (A) (A)
                 (A) (A) (A) (A) (A) (A) (A) (A) (A)
 Requested convergence on RMS density matrix=1.00D-08 within 128 cycles.
 Requested convergence on MAX density matrix=1.00D-06.
 Requested convergence on             energy=1.00D-06.
 No special actions if energy rises.
 SCF Done:  E(RB+HF-LYP) =  -405.915398767     A.U. after   14 cycles
             Convg  =    0.4320D-08             -V/T =  2.0052
             S**2   =   0.0000
 Range of M.O.s used for correlation:     1   261
 NBasis=   261 NAE=    36 NBE=    36 NFC=     0 NFV=     0
 NROrb=    261 NOA=    36 NOB=    36 NVA=   225 NVB=   225

 **** Warning!!: The largest alpha MO coefficient is  0.20206074D+02

 Symmetrizing basis deriv contribution to polar:
 IMax=3 JMax=2 DiffMx= 0.00D+00
 G2DrvN: will do   25 centers at a time, making    1 passes doing MaxLOS=2.
 FoFDir/FoFCou used for L=0 through L=2.
 DoAtom=TTTTTTTTTTTTTTTTTTTTTTTT
          Differentiating once with respect to electric field.
                with respect to dipole field.
          Differentiating once with respect to nuclear coordinates.
 Integrals replicated using symmetry in FoFDir.
 MinBra= 0 MaxBra= 2 Meth= 1.
 IRaf=       0 NMat=  75 IRICut=      75 DoRegI=T DoRafI=T ISym2E= 2 JSym2E=2.
          There are  75 degrees of freedom in the 1st order CPHF.
    72 vectors were produced by pass  0.
 AX will form  72 AO Fock derivatives at one time.
    72 vectors were produced by pass  1.
    72 vectors were produced by pass  2.
    72 vectors were produced by pass  3.
    72 vectors were produced by pass  4.
    42 vectors were produced by pass  5.
     6 vectors were produced by pass  6.
     3 vectors were produced by pass  7.
 Inv2:  IOpt= 1 Iter= 1 AM= 3.17D-15 Conv= 1.00D-12.
 Inverted reduced A of dimension  411 with in-core refinement.
 Isotropic polarizability for W=    0.000000       94.27 Bohr**3.
 End of Minotr Frequency-dependent properties file   721 does not exist.
 ***** Axes restored to original set *****
 -------------------------------------------------------------------
 Center     Atomic                   Forces (Hartrees/Bohr)
 Number     Number              X              Y              Z
 -------------------------------------------------------------------
    1          7           0.000000137    0.000000063    0.000000732
    2          6          -0.000000118   -0.000000160   -0.000000414
    3          1          -0.000000279   -0.000000004    0.000000159
    4          6          -0.000000363   -0.000000340    0.000000132
    5          1          -0.000000381   -0.000000446   -0.000000015
    6          1          -0.000000167   -0.000000316   -0.000000105
    7          1           0.000000171   -0.000000595    0.000000003
    8          6           0.000000159    0.000000269    0.000000250
    9          1           0.000000298    0.000000315    0.000000093
   10          6           0.000000187    0.000000367   -0.000000174
   11          1          -0.000000333    0.000000341   -0.000000050
   12          1           0.000000013    0.000000597   -0.000000023
   13          1           0.000000172    0.000000327   -0.000000010
   14          6           0.000000368   -0.000000193   -0.000000518
   15          1           0.000000551   -0.000000031    0.000000040
   16          8           0.000000402   -0.000000416    0.000000141
   17          6           0.000000006   -0.000000373    0.000000112
   18          1          -0.000000343   -0.000000424   -0.000000026
   19          1          -0.000000212   -0.000000412    0.000000032
   20          1          -0.000000130   -0.000000168   -0.000000112
   21          6          -0.000000110    0.000000342   -0.000000166
   22          1           0.000000052    0.000000682    0.000000010
   23          1          -0.000000178    0.000000336   -0.000000076
   24          1           0.000000098    0.000000238   -0.000000014
 -------------------------------------------------------------------
 Cartesian Forces:  Max     0.000000732 RMS     0.000000287

 GradGradGradGradGradGradGradGradGradGradGradGradGradGradGradGradGradGrad
 Berny optimization.
 Internal  Forces:  Max     0.000000370 RMS     0.000000108
 Search for a local minimum.
 Step number   5 out of a maximum of 127
 All quantities printed in internal units (Hartrees-Bohrs-Radians)
 Second derivative matrix not updated -- analytic derivatives used.
 Trust test= 9.81D-01 RLast= 1.44D-03 DXMaxT set to 3.00D-01
     Eigenvalues ---    0.00203   0.00225   0.00281   0.00295   0.00462
     Eigenvalues ---    0.00684   0.01149   0.02071   0.04039   0.04158
     Eigenvalues ---    0.04446   0.04509   0.04516   0.04546   0.04585
     Eigenvalues ---    0.04606   0.04679   0.04710   0.05128   0.05358
     Eigenvalues ---    0.05429   0.05472   0.08514   0.11982   0.12055
     Eigenvalues ---    0.12412   0.12415   0.12773   0.13061   0.13191
     Eigenvalues ---    0.13485   0.14555   0.14592   0.14775   0.15035
     Eigenvalues ---    0.15140   0.18390   0.18837   0.19782   0.19932
     Eigenvalues ---    0.22115   0.24059   0.26723   0.27296   0.27630
     Eigenvalues ---    0.28023   0.28960   0.31287   0.32522   0.33310
     Eigenvalues ---    0.33346   0.33357   0.33493   0.33497   0.33552
     Eigenvalues ---    0.33759   0.33784   0.33816   0.34360   0.34469
     Eigenvalues ---    0.34746   0.34779   0.34842   0.38450   0.45232
     Eigenvalues ---    0.806351000.000001000.000001000.000001000.00000
     Eigenvalues --- 1000.000001000.000001000.000001000.000001000.00000
     Eigenvalues --- 1000.000001000.000001000.000001000.000001000.00000
     Eigenvalues --- 1000.000001000.000001000.000001000.000001000.00000
     Eigenvalues --- 1000.000001000.000001000.000001000.000001000.00000
     Eigenvalues --- 1000.000001000.000001000.000001000.000001000.00000
     Eigenvalues --- 1000.000001000.000001000.000001000.000001000.00000
     Eigenvalues --- 1000.000001000.000001000.000001000.000001000.00000
     Eigenvalues --- 1000.000001000.000001000.000001000.000001000.00000
     Eigenvalues --- 1000.000001000.000001000.000001000.000001000.00000
     Eigenvalues --- 1000.000001000.00000
 RFO step:  Lambda= 0.00000000D+00.
 Quintic linear search produced a step of -0.07059.
 Iteration  1 RMS(Cart)=  0.00002827 RMS(Int)=  0.00000000
 Iteration  2 RMS(Cart)=  0.00000000 RMS(Int)=  0.00000000
 Variable       Old X    -DE/DX   Delta X   Delta X   Delta X     New X
                                 (Linear)    (Quad)   (Total)
    R1        2.80177   0.00000   0.00000   0.00000   0.00000   2.80177
    R2        2.78511   0.00000   0.00000   0.00000   0.00000   2.78511
    R3        2.56729   0.00000   0.00000   0.00000   0.00000   2.56729
    R4        2.06153   0.00000   0.00000   0.00000   0.00000   2.06153
    R5        2.89629   0.00000   0.00000   0.00000   0.00000   2.89629
    R6        2.89629   0.00000   0.00000   0.00000   0.00000   2.89629
    R7        2.06442   0.00000   0.00000   0.00000   0.00000   2.06442
    R8        2.06273   0.00000   0.00000   0.00000   0.00000   2.06273
    R9        2.05721   0.00000   0.00000   0.00000   0.00000   2.05721
   R10        2.06534   0.00000   0.00000   0.00000   0.00000   2.06534
   R11        2.89580   0.00000   0.00000   0.00000   0.00000   2.89580
   R12        2.89580   0.00000   0.00000   0.00000   0.00000   2.89580
   R13        2.06376   0.00000   0.00000   0.00000   0.00000   2.06376
   R14        2.06366   0.00000   0.00000   0.00000   0.00000   2.06366
   R15        2.06162   0.00000   0.00000   0.00000   0.00000   2.06162
   R16        2.08969   0.00000   0.00000   0.00000   0.00000   2.08969
   R17        2.30294   0.00000   0.00000   0.00000   0.00000   2.30294
   R18        2.06442   0.00000   0.00000   0.00000   0.00000   2.06442
   R19        2.05721   0.00000   0.00000   0.00000   0.00000   2.05721
   R20        2.06273   0.00000   0.00000   0.00000   0.00000   2.06273
   R21        2.06366   0.00000   0.00000   0.00000   0.00000   2.06366
   R22        2.06376   0.00000   0.00000   0.00000   0.00000   2.06376
   R23        2.06162   0.00000   0.00000   0.00000   0.00000   2.06162
    A1        2.08845   0.00000   0.00000   0.00000   0.00000   2.08845
    A2        2.10936   0.00000   0.00000   0.00000   0.00000   2.10936
    A3        2.08537   0.00000   0.00000   0.00000   0.00000   2.08537
    A4        1.83424   0.00000   0.00000   0.00000   0.00000   1.83424
    A5        1.95493   0.00000   0.00000   0.00000   0.00000   1.95493
    A6        1.95493   0.00000   0.00000   0.00000   0.00000   1.95493
    A7        1.87615   0.00000   0.00000   0.00000   0.00000   1.87615
    A8        1.87615   0.00000   0.00000   0.00000   0.00000   1.87615
    A9        1.95939   0.00000   0.00000   0.00000   0.00000   1.95939
   A10        1.91356   0.00000   0.00000   0.00000   0.00000   1.91356
   A11        1.93669   0.00000   0.00000   0.00000   0.00000   1.93669
   A12        1.93559   0.00000   0.00000   0.00000   0.00000   1.93559
   A13        1.88572   0.00000   0.00000   0.00000   0.00000   1.88572
   A14        1.89520   0.00000   0.00000   0.00000   0.00000   1.89520
   A15        1.89589   0.00000   0.00000   0.00000   0.00000   1.89589
   A16        1.83286   0.00000   0.00000   0.00000   0.00000   1.83286
   A17        1.95896   0.00000   0.00000   0.00000   0.00000   1.95896
   A18        1.95896   0.00000   0.00000   0.00000   0.00000   1.95896
   A19        1.87432   0.00000   0.00000   0.00000   0.00000   1.87432
   A20        1.87432   0.00000   0.00000   0.00000   0.00000   1.87432
   A21        1.95593   0.00000   0.00000   0.00000   0.00000   1.95593
   A22        1.95217   0.00000   0.00000   0.00000   0.00000   1.95217
   A23        1.92035   0.00000   0.00000   0.00000   0.00000   1.92035
   A24        1.93531   0.00000   0.00000   0.00000   0.00000   1.93531
   A25        1.87516   0.00000   0.00000   0.00000   0.00000   1.87516
   A26        1.88935   0.00000   0.00000   0.00000   0.00000   1.88935
   A27        1.88933   0.00000   0.00000   0.00000   0.00000   1.88933
   A28        1.95664   0.00000   0.00000   0.00000   0.00000   1.95664
   A29        2.20636   0.00000   0.00000   0.00000   0.00000   2.20636
   A30        2.12019   0.00000   0.00000   0.00000   0.00000   2.12019
   A31        1.91356   0.00000   0.00000   0.00000   0.00000   1.91356
   A32        1.93559   0.00000   0.00000   0.00000   0.00000   1.93559
   A33        1.93669   0.00000   0.00000   0.00000   0.00000   1.93669
   A34        1.89520   0.00000   0.00000   0.00000   0.00000   1.89520
   A35        1.88571   0.00000   0.00000   0.00000   0.00000   1.88572
   A36        1.89589   0.00000   0.00000   0.00000   0.00000   1.89589
   A37        1.92035   0.00000   0.00000   0.00000   0.00000   1.92035
   A38        1.95217   0.00000   0.00000   0.00000   0.00000   1.95217
   A39        1.93531   0.00000   0.00000   0.00000   0.00000   1.93531
   A40        1.87516   0.00000   0.00000   0.00000   0.00000   1.87516
   A41        1.88933   0.00000   0.00000   0.00000   0.00000   1.88933
   A42        1.88935   0.00000   0.00000   0.00000   0.00000   1.88935
    D1        0.00002   0.00000  -0.00002   0.00000  -0.00003   0.00000
    D2        2.03184   0.00000  -0.00002  -0.00001  -0.00003   2.03182
    D3       -2.03180   0.00000  -0.00002   0.00000  -0.00003  -2.03182
    D4        3.14158   0.00000   0.00000   0.00001   0.00001  -3.14159
    D5       -1.10978   0.00000   0.00000   0.00001   0.00001  -1.10977
    D6        1.10976   0.00000   0.00000   0.00001   0.00001   1.10977
    D7       -3.14158   0.00000  -0.00001  -0.00001  -0.00002   3.14159
    D8       -1.11071   0.00000  -0.00001  -0.00001  -0.00002  -1.11073
    D9        1.11074   0.00000  -0.00001  -0.00001  -0.00002   1.11073
   D10        0.00005   0.00000  -0.00003  -0.00002  -0.00005  -0.00001
   D11        2.03091   0.00000  -0.00003  -0.00002  -0.00005   2.03086
   D12       -2.03082   0.00000  -0.00003  -0.00002  -0.00005  -2.03087
   D13       -3.14158   0.00000  -0.00001   0.00000  -0.00001   3.14159
   D14        0.00001   0.00000  -0.00001  -0.00001  -0.00002   0.00000
   D15       -0.00002   0.00000   0.00002   0.00001   0.00003   0.00000
   D16        3.14157   0.00000   0.00001   0.00001   0.00002  -3.14159
   D17       -3.04844   0.00000   0.00001   0.00000   0.00001  -3.04843
   D18       -0.96680   0.00000   0.00001   0.00000   0.00001  -0.96679
   D19        1.14202   0.00000   0.00001   0.00000   0.00001   1.14204
   D20       -1.04210   0.00000   0.00001   0.00000   0.00001  -1.04208
   D21        1.03954   0.00000   0.00001   0.00000   0.00001   1.03955
   D22       -3.13482   0.00000   0.00001   0.00000   0.00002  -3.13480
   D23        1.01760   0.00000   0.00001   0.00000   0.00001   1.01761
   D24        3.09924   0.00000   0.00001   0.00000   0.00001   3.09925
   D25       -1.07512   0.00000   0.00001   0.00000   0.00002  -1.07510
   D26        3.04841   0.00000   0.00001   0.00001   0.00002   3.04843
   D27       -1.14205   0.00000   0.00001   0.00001   0.00002  -1.14203
   D28        0.96678   0.00000   0.00001   0.00001   0.00002   0.96680
   D29        1.04207   0.00000   0.00001   0.00001   0.00002   1.04209
   D30        3.13478   0.00000   0.00001   0.00001   0.00002   3.13481
   D31       -1.03957   0.00000   0.00001   0.00001   0.00002  -1.03955
   D32       -1.01763   0.00000   0.00001   0.00001   0.00002  -1.01761
   D33        1.07509   0.00000   0.00001   0.00001   0.00002   1.07511
   D34       -3.09927   0.00000   0.00001   0.00001   0.00002  -3.09925
   D35        1.15128   0.00000   0.00001  -0.00001   0.00000   1.15128
   D36       -3.04919   0.00000   0.00001  -0.00001   0.00000  -3.04920
   D37       -0.95957   0.00000   0.00001  -0.00001   0.00000  -0.95957
   D38       -3.12615   0.00000   0.00001  -0.00001   0.00000  -3.12615
   D39       -1.04343   0.00000   0.00001  -0.00001   0.00000  -1.04343
   D40        1.04619   0.00000   0.00001  -0.00001   0.00000   1.04619
   D41       -1.07180   0.00000   0.00001  -0.00001   0.00000  -1.07180
   D42        1.01092   0.00000   0.00001  -0.00001   0.00000   1.01091
   D43        3.10054   0.00000   0.00001  -0.00001   0.00000   3.10054
   D44        3.04922   0.00000   0.00001  -0.00003  -0.00002   3.04920
   D45       -1.15125   0.00000   0.00001  -0.00003  -0.00002  -1.15127
   D46        0.95959   0.00000   0.00001  -0.00003  -0.00002   0.95958
   D47        1.04346   0.00000   0.00001  -0.00003  -0.00002   1.04344
   D48        3.12617   0.00000   0.00001  -0.00003  -0.00002   3.12615
   D49       -1.04617   0.00000   0.00001  -0.00003  -0.00002  -1.04618
   D50       -1.01089   0.00000   0.00001  -0.00003  -0.00002  -1.01091
   D51        1.07182   0.00000   0.00001  -0.00003  -0.00002   1.07180
   D52       -3.10051   0.00000   0.00001  -0.00003  -0.00002  -3.10053
         Item               Value     Threshold  Converged?
 Maximum Force            0.000000     0.000015     YES
 RMS     Force            0.000000     0.000010     YES
 Maximum Displacement     0.000103     0.000060     NO 
 RMS     Displacement     0.000028     0.000040     YES
 Predicted change in Energy=-4.489345D-11
 GradGradGradGradGradGradGradGradGradGradGradGradGradGradGradGradGradGrad

                          Input orientation:                          
 ---------------------------------------------------------------------
 Center     Atomic     Atomic              Coordinates (Angstroms)
 Number     Number      Type              X           Y           Z
 ---------------------------------------------------------------------
    1          7             0       -0.057708    0.390427   -0.016515
    2          6             0        0.667635   -0.901658    0.034347
    3          1             0       -0.112011   -1.664095    0.065063
    4          6             0        1.499215   -1.143683   -1.230138
    5          1             0        1.939539   -2.142816   -1.194355
    6          1             0        0.877082   -1.080232   -2.124792
    7          1             0        2.302269   -0.413321   -1.312546
    8          6             0       -1.531496    0.399967   -0.016041
    9          1             0       -1.807827    1.456563   -0.057815
   10          6             0       -2.116280   -0.275946   -1.260785
   11          1             0       -1.894894   -1.345103   -1.284636
   12          1             0       -3.202773   -0.166415   -1.270250
   13          1             0       -1.719427    0.175553   -2.171200
   14          6             0        0.618542    1.567766   -0.063639
   15          1             0       -0.062879    2.438014   -0.097785
   16          8             0        1.829223    1.706901   -0.069864
   17          6             0        1.500694   -1.042739    1.313071
   18          1             0        1.941025   -2.041584    1.356077
   19          1             0        2.303806   -0.308177    1.336402
   20          1             0        0.879595   -0.908553    2.200603
   21          6             0       -2.114811   -0.175146    1.279029
   22          1             0       -3.201298   -0.065164    1.281037
   23          1             0       -1.893344   -1.239058    1.387284
   24          1             0       -1.716932    0.347070    2.150340
 ---------------------------------------------------------------------
                    Distance matrix (angstroms):
                    1          2          3          4          5
     1  N    0.000000
     2  C    1.482631   0.000000
     3  H    2.056858   1.090917   0.000000
     4  C    2.500077   1.532653   2.131765   0.000000
     5  H    3.434185   2.160538   2.454418   1.092443   0.000000
     6  H    2.735234   2.176612   2.472785   1.091550   1.767375
     7  H    2.809840   2.173621   3.048113   1.088630   1.771072
     8  C    1.473819   2.555962   2.506365   3.611384   4.461194
     9  H    2.049700   3.420177   3.553786   4.367167   5.318835
    10  C    2.495993   3.133538   2.775233   3.718294   4.465342
    11  H    2.827622   2.915975   2.258786   3.400517   3.917573
    12  H    3.431234   4.150014   3.684958   4.802641   5.509564
    13  H    2.729496   3.423870   3.311943   3.603560   4.440394
    14  C    1.358551   2.471855   3.315900   3.080303   4.097801
    15  H    2.049205   3.421187   4.105633   4.068282   5.118217
    16  O    2.301403   2.857399   3.892326   3.095314   4.012103
    17  C    2.500076   1.532653   2.131765   2.545212   2.773074
    18  H    3.434184   2.160538   2.454419   2.773073   2.552441
    19  H    2.809837   2.173620   3.048112   2.816481   3.146954
    20  H    2.735233   2.176612   2.472783   3.494167   3.764655
    21  C    2.495993   3.133537   2.775228   4.505016   5.140730
    22  H    3.431234   4.150012   3.684951   5.437281   6.072266
    23  H    2.827620   2.915972   2.258777   4.285960   4.708783
    24  H    2.729499   3.423872   3.311938   4.898324   5.545836
                    6          7          8          9         10
     6  H    0.000000
     7  H    1.770783   0.000000
     8  C    3.526906   4.127968   0.000000
     9  H    4.232784   4.686545   1.092932   0.000000
    10  C    3.217701   4.420987   1.532390   2.131635   0.000000
    11  H    2.908585   4.299439   2.187844   3.059739   1.092097
    12  H    4.267379   5.510739   2.164948   2.459661   1.092042
    13  H    2.884616   4.154287   2.174946   2.472892   1.090963
    14  C    3.365574   2.884340   2.447178   2.428923   3.508801
    15  H    4.167774   3.898677   2.513395   2.002420   3.596471
    16  O    3.591297   2.502673   3.606301   3.645675   4.573507
    17  C    3.494167   2.816480   3.611387   4.367167   4.505020
    18  H    3.764655   3.146949   4.461197   5.318836   5.140736
    19  H    3.822496   2.651035   4.127967   4.686543   5.126751
    20  H    4.328802   3.822496   3.526910   4.232785   4.621327
    21  C    4.621320   5.126752   1.532389   2.131635   2.541814
    22  H    5.409549   6.094025   2.164947   2.459662   2.771742
    23  H    4.476066   5.057084   2.187843   3.059738   2.826580
    24  H    5.200274   5.359454   2.174946   2.472890   3.490473
                   11         12         13         14         15
    11  H    0.000000
    12  H    1.760699   0.000000
    13  H    1.768948   1.768889   0.000000
    14  C    4.036458   4.366434   3.441826   0.000000
    15  H    4.367707   4.244604   3.487396   1.105817   0.000000
    16  O    4.965827   5.501929   4.399267   1.218666   2.028634
    17  C    4.285968   5.437288   4.898322   3.080302   4.068282
    18  H    4.708793   6.072275   5.545836   4.097800   5.118216
    19  H    5.057088   6.094026   5.359447   2.884336   3.898674
    20  H    4.476076   5.409559   5.200276   3.365575   4.167776
    21  C    2.826578   2.771744   3.490473   3.508805   3.596476
    22  H    3.150812   2.553296   3.764548   4.366439   4.244611
    23  H    2.674024   3.150818   3.833299   4.036460   4.367710
    24  H    3.833299   3.764549   4.324943   3.441836   3.487405
                   16         17         18         19         20
    16  O    0.000000
    17  C    3.095313   0.000000
    18  H    4.012100   1.092443   0.000000
    19  H    2.502670   1.088630   1.771072   0.000000
    20  H    3.591297   1.091550   1.767375   1.770783   0.000000
    21  C    4.573512   3.718299   4.465348   4.420992   3.217709
    22  H    5.501935   4.802646   5.509570   5.510744   4.267388
    23  H    4.965829   3.400521   3.917577   4.299442   2.908593
    24  H    4.399279   3.603568   4.440402   4.154296   2.884626
                   21         22         23         24
    21  C    0.000000
    22  H    1.092042   0.000000
    23  H    1.092097   1.760699   0.000000
    24  H    1.090963   1.768889   1.768948   0.000000
 Stoichiometry    C7H15NO
 Framework group  C1[X(C7H15NO)]
 Deg. of freedom    66
 Full point group                 C1
 Largest Abelian subgroup         C1      NOp   1
 Largest concise Abelian subgroup C1      NOp   1
                         Standard orientation:                         
 ---------------------------------------------------------------------
 Center     Atomic     Atomic              Coordinates (Angstroms)
 Number     Number      Type              X           Y           Z
 ---------------------------------------------------------------------
    1          7             0        0.057684    0.390711   -0.000004
    2          6             0       -0.667453   -0.902490    0.000003
    3          1             0        0.112314   -1.665421    0.000004
    4          6             0       -1.499740   -1.094303    1.272612
    5          1             0       -1.939907   -2.094138    1.276231
    6          1             0       -0.878138   -0.995316    2.164405
    7          1             0       -2.302941   -0.361374    1.325521
    8          6             0        1.531471    0.400459   -0.000004
    9          1             0        1.807634    1.457924   -0.000011
   10          6             0        2.115619   -0.225458    1.270908
   11          1             0        1.894364   -1.292862    1.337020
   12          1             0        3.202092   -0.115465    1.276651
   13          1             0        1.718173    0.261734    2.162469
   14          6             0       -0.618753    1.568885   -0.000007
   15          1             0        0.062530    2.439911   -0.000011
   16          8             0       -1.829456    1.707965   -0.000006
   17          6             0       -1.499745   -1.094312   -1.272601
   18          1             0       -1.939916   -2.094146   -1.276209
   19          1             0       -2.302944   -0.361381   -1.325514
   20          1             0       -0.878147   -0.995336   -2.164397
   21          6             0        2.115621   -0.225476   -1.270905
   22          1             0        3.202094   -0.115488   -1.276645
   23          1             0        1.894362   -1.292880   -1.337004
   24          1             0        1.718180    0.261706   -2.162474
 ---------------------------------------------------------------------
 Rotational constants (GHZ):      1.9825320      1.2017194      1.1106420
 Standard basis: TZVP (5D, 7F)
 There are   261 symmetry adapted basis functions of A   symmetry.
 Integral buffers will be    131072 words long.
 Raffenetti 2 integral format.
 Two-electron integral symmetry is turned on.
   261 basis functions,   435 primitive gaussians,   270 cartesian basis functions
    36 alpha electrons       36 beta electrons
       nuclear repulsion energy       498.0339429522 Hartrees.
 NAtoms=   24 NActive=   24 NUniq=   24 SFac= 7.50D-01 NAtFMM=   80 NAOKFM=F Big=F
 One-electron integrals computed using PRISM.
 NBasis=   261 RedAO= T  NBF=   261
 NBsUse=   261 1.00D-06 NBFU=   261
 Initial guess read from the read-write file:
 Initial guess orbital symmetries:
       Occupied  (A) (A) (A) (A) (A) (A) (A) (A) (A) (A) (A) (A)
                 (A) (A) (A) (A) (A) (A) (A) (A) (A) (A) (A) (A)
                 (A) (A) (A) (A) (A) (A) (A) (A) (A) (A) (A) (A)
       Virtual   (A) (A) (A) (A) (A) (A) (A) (A) (A) (A) (A) (A)
                 (A) (A) (A) (A) (A) (A) (A) (A) (A) (A) (A) (A)
                 (A) (A) (A) (A) (A) (A) (A) (A) (A) (A) (A) (A)
                 (A) (A) (A) (A) (A) (A) (A) (A) (A) (A) (A) (A)
                 (A) (A) (A) (A) (A) (A) (A) (A) (A) (A) (A) (A)
                 (A) (A) (A) (A) (A) (A) (A) (A) (A) (A) (A) (A)
                 (A) (A) (A) (A) (A) (A) (A) (A) (A) (A) (A) (A)
                 (A) (A) (A) (A) (A) (A) (A) (A) (A) (A) (A) (A)
                 (A) (A) (A) (A) (A) (A) (A) (A) (A) (A) (A) (A)
                 (A) (A) (A) (A) (A) (A) (A) (A) (A) (A) (A) (A)
                 (A) (A) (A) (A) (A) (A) (A) (A) (A) (A) (A) (A)
                 (A) (A) (A) (A) (A) (A) (A) (A) (A) (A) (A) (A)
                 (A) (A) (A) (A) (A) (A) (A) (A) (A) (A) (A) (A)
                 (A) (A) (A) (A) (A) (A) (A) (A) (A) (A) (A) (A)
                 (A) (A) (A) (A) (A) (A) (A) (A) (A) (A) (A) (A)
                 (A) (A) (A) (A) (A) (A) (A) (A) (A) (A) (A) (A)
                 (A) (A) (A) (A) (A) (A) (A) (A) (A) (A) (A) (A)
                 (A) (A) (A) (A) (A) (A) (A) (A) (A) (A) (A) (A)
                 (A) (A) (A) (A) (A) (A) (A) (A) (A)
 Requested convergence on RMS density matrix=1.00D-08 within 128 cycles.
 Requested convergence on MAX density matrix=1.00D-06.
 Requested convergence on             energy=1.00D-06.
 No special actions if energy rises.
 SCF Done:  E(RB+HF-LYP) =  -405.915398767     A.U. after   14 cycles
             Convg  =    0.4320D-08             -V/T =  2.0052
             S**2   =   0.0000
 Range of M.O.s used for correlation:     1   261
 NBasis=   261 NAE=    36 NBE=    36 NFC=     0 NFV=     0
 NROrb=    261 NOA=    36 NOB=    36 NVA=   225 NVB=   225

 **** Warning!!: The largest alpha MO coefficient is  0.20205989D+02

 Symmetrizing basis deriv contribution to polar:
 IMax=3 JMax=2 DiffMx= 0.00D+00
 G2DrvN: will do   25 centers at a time, making    1 passes doing MaxLOS=2.
 FoFDir/FoFCou used for L=0 through L=2.
 DoAtom=TTTTTTTTTTTTTTTTTTTTTTTT
          Differentiating once with respect to electric field.
                with respect to dipole field.
          Differentiating once with respect to nuclear coordinates.
 Integrals replicated using symmetry in FoFDir.
 MinBra= 0 MaxBra= 2 Meth= 1.
 IRaf=       0 NMat=  75 IRICut=      75 DoRegI=T DoRafI=T ISym2E= 2 JSym2E=2.
          There are  75 degrees of freedom in the 1st order CPHF.
    72 vectors were produced by pass  0.
 AX will form  72 AO Fock derivatives at one time.
    72 vectors were produced by pass  1.
    72 vectors were produced by pass  2.
    72 vectors were produced by pass  3.
    72 vectors were produced by pass  4.
    42 vectors were produced by pass  5.
     6 vectors were produced by pass  6.
     2 vectors were produced by pass  7.
 Inv2:  IOpt= 1 Iter= 1 AM= 2.47D-15 Conv= 1.00D-12.
 Inverted reduced A of dimension  410 with in-core refinement.
 Isotropic polarizability for W=    0.000000       94.27 Bohr**3.
 End of Minotr Frequency-dependent properties file   721 does not exist.
 ***** Axes restored to original set *****
 -------------------------------------------------------------------
 Center     Atomic                   Forces (Hartrees/Bohr)
 Number     Number              X              Y              Z
 -------------------------------------------------------------------
    1          7           0.000000134   -0.000000034   -0.000000075
    2          6          -0.000000128   -0.000000175    0.000000084
    3          1          -0.000000284   -0.000000022   -0.000000032
    4          6          -0.000000131   -0.000000354   -0.000000004
    5          1          -0.000000371   -0.000000437    0.000000023
    6          1          -0.000000146   -0.000000204    0.000000027
    7          1          -0.000000055   -0.000000496    0.000000023
    8          6           0.000000136    0.000000266   -0.000000063
    9          1           0.000000350    0.000000324   -0.000000032
   10          6          -0.000000013    0.000000384    0.000000010
   11          1          -0.000000182    0.000000343   -0.000000012
   12          1           0.000000035    0.000000603   -0.000000020
   13          1           0.000000091    0.000000304   -0.000000014
   14          6           0.000000373   -0.000000167    0.000000065
   15          1           0.000000550   -0.000000030   -0.000000005
   16          8           0.000000402   -0.000000415   -0.000000006
   17          6          -0.000000205   -0.000000342   -0.000000005
   18          1          -0.000000370   -0.000000436    0.000000023
   19          1           0.000000018   -0.000000525    0.000000025
   20          1          -0.000000149   -0.000000237    0.000000028
   21          6           0.000000030    0.000000390    0.000000010
   22          1           0.000000027    0.000000611   -0.000000021
   23          1          -0.000000234    0.000000341   -0.000000012
   24          1           0.000000124    0.000000307   -0.000000014
 -------------------------------------------------------------------
 Cartesian Forces:  Max     0.000000611 RMS     0.000000250

 GradGradGradGradGradGradGradGradGradGradGradGradGradGradGradGradGradGrad
 Berny optimization.
 Internal  Forces:  Max     0.000000066 RMS     0.000000018
 Search for a local minimum.
 Step number   6 out of a maximum of 127
 All quantities printed in internal units (Hartrees-Bohrs-Radians)
 Second derivative matrix not updated -- analytic derivatives used.
 Trust test= 1.33D+00 RLast= 1.46D-04 DXMaxT set to 3.00D-01
     Eigenvalues ---    0.00203   0.00225   0.00281   0.00295   0.00462
     Eigenvalues ---    0.00684   0.01149   0.02071   0.04039   0.04158
     Eigenvalues ---    0.04446   0.04509   0.04516   0.04546   0.04585
     Eigenvalues ---    0.04606   0.04679   0.04710   0.05128   0.05358
     Eigenvalues ---    0.05429   0.05472   0.08514   0.11982   0.12055
     Eigenvalues ---    0.12412   0.12415   0.12773   0.13061   0.13191
     Eigenvalues ---    0.13485   0.14555   0.14592   0.14775   0.15035
     Eigenvalues ---    0.15140   0.18390   0.18837   0.19782   0.19932
     Eigenvalues ---    0.22115   0.24059   0.26723   0.27296   0.27630
     Eigenvalues ---    0.28023   0.28960   0.31287   0.32522   0.33310
     Eigenvalues ---    0.33346   0.33357   0.33493   0.33497   0.33552
     Eigenvalues ---    0.33759   0.33784   0.33816   0.34360   0.34469
     Eigenvalues ---    0.34746   0.34779   0.34842   0.38450   0.45232
     Eigenvalues ---    0.806351000.000001000.000001000.000001000.00000
     Eigenvalues --- 1000.000001000.000001000.000001000.000001000.00000
     Eigenvalues --- 1000.000001000.000001000.000001000.000001000.00000
     Eigenvalues --- 1000.000001000.000001000.000001000.000001000.00000
     Eigenvalues --- 1000.000001000.000001000.000001000.000001000.00000
     Eigenvalues --- 1000.000001000.000001000.000001000.000001000.00000
     Eigenvalues --- 1000.000001000.000001000.000001000.000001000.00000
     Eigenvalues --- 1000.000001000.000001000.000001000.000001000.00000
     Eigenvalues --- 1000.000001000.000001000.000001000.000001000.00000
     Eigenvalues --- 1000.000001000.000001000.000001000.000001000.00000
     Eigenvalues --- 1000.000001000.00000
 RFO step:  Lambda= 0.00000000D+00.
 Quintic linear search produced a step of -0.07181.
 Iteration  1 RMS(Cart)=  0.00000274 RMS(Int)=  0.00000000
 Iteration  2 RMS(Cart)=  0.00000000 RMS(Int)=  0.00000000
 Variable       Old X    -DE/DX   Delta X   Delta X   Delta X     New X
                                 (Linear)    (Quad)   (Total)
    R1        2.80177   0.00000   0.00000   0.00000   0.00000   2.80177
    R2        2.78511   0.00000   0.00000   0.00000   0.00000   2.78511
    R3        2.56729   0.00000   0.00000   0.00000   0.00000   2.56729
    R4        2.06153   0.00000   0.00000   0.00000   0.00000   2.06153
    R5        2.89629   0.00000   0.00000   0.00000   0.00000   2.89629
    R6        2.89629   0.00000   0.00000   0.00000   0.00000   2.89629
    R7        2.06442   0.00000   0.00000   0.00000   0.00000   2.06442
    R8        2.06273   0.00000   0.00000   0.00000   0.00000   2.06273
    R9        2.05721   0.00000   0.00000   0.00000   0.00000   2.05721
   R10        2.06534   0.00000   0.00000   0.00000   0.00000   2.06534
   R11        2.89580   0.00000   0.00000   0.00000   0.00000   2.89580
   R12        2.89580   0.00000   0.00000   0.00000   0.00000   2.89580
   R13        2.06376   0.00000   0.00000   0.00000   0.00000   2.06376
   R14        2.06366   0.00000   0.00000   0.00000   0.00000   2.06366
   R15        2.06162   0.00000   0.00000   0.00000   0.00000   2.06162
   R16        2.08969   0.00000   0.00000   0.00000   0.00000   2.08969
   R17        2.30294   0.00000   0.00000   0.00000   0.00000   2.30294
   R18        2.06442   0.00000   0.00000   0.00000   0.00000   2.06442
   R19        2.05721   0.00000   0.00000   0.00000   0.00000   2.05721
   R20        2.06273   0.00000   0.00000   0.00000   0.00000   2.06273
   R21        2.06366   0.00000   0.00000   0.00000   0.00000   2.06366
   R22        2.06376   0.00000   0.00000   0.00000   0.00000   2.06376
   R23        2.06162   0.00000   0.00000   0.00000   0.00000   2.06162
    A1        2.08845   0.00000   0.00000   0.00000   0.00000   2.08845
    A2        2.10936   0.00000   0.00000   0.00000   0.00000   2.10936
    A3        2.08537   0.00000   0.00000   0.00000   0.00000   2.08537
    A4        1.83424   0.00000   0.00000   0.00000   0.00000   1.83424
    A5        1.95493   0.00000   0.00000   0.00000   0.00000   1.95493
    A6        1.95493   0.00000   0.00000   0.00000   0.00000   1.95493
    A7        1.87615   0.00000   0.00000   0.00000   0.00000   1.87615
    A8        1.87615   0.00000   0.00000   0.00000   0.00000   1.87615
    A9        1.95939   0.00000   0.00000   0.00000   0.00000   1.95939
   A10        1.91356   0.00000   0.00000   0.00000   0.00000   1.91356
   A11        1.93669   0.00000   0.00000   0.00000   0.00000   1.93669
   A12        1.93559   0.00000   0.00000   0.00000   0.00000   1.93559
   A13        1.88572   0.00000   0.00000   0.00000   0.00000   1.88572
   A14        1.89520   0.00000   0.00000   0.00000   0.00000   1.89520
   A15        1.89589   0.00000   0.00000   0.00000   0.00000   1.89589
   A16        1.83286   0.00000   0.00000   0.00000   0.00000   1.83286
   A17        1.95896   0.00000   0.00000   0.00000   0.00000   1.95896
   A18        1.95896   0.00000   0.00000   0.00000   0.00000   1.95896
   A19        1.87432   0.00000   0.00000   0.00000   0.00000   1.87432
   A20        1.87432   0.00000   0.00000   0.00000   0.00000   1.87432
   A21        1.95593   0.00000   0.00000   0.00000   0.00000   1.95593
   A22        1.95217   0.00000   0.00000   0.00000   0.00000   1.95217
   A23        1.92035   0.00000   0.00000   0.00000   0.00000   1.92035
   A24        1.93531   0.00000   0.00000   0.00000   0.00000   1.93531
   A25        1.87516   0.00000   0.00000   0.00000   0.00000   1.87516
   A26        1.88935   0.00000   0.00000   0.00000   0.00000   1.88935
   A27        1.88933   0.00000   0.00000   0.00000   0.00000   1.88933
   A28        1.95664   0.00000   0.00000   0.00000   0.00000   1.95664
   A29        2.20636   0.00000   0.00000   0.00000   0.00000   2.20636
   A30        2.12019   0.00000   0.00000   0.00000   0.00000   2.12019
   A31        1.91356   0.00000   0.00000   0.00000   0.00000   1.91356
   A32        1.93559   0.00000   0.00000   0.00000   0.00000   1.93559
   A33        1.93669   0.00000   0.00000   0.00000   0.00000   1.93669
   A34        1.89520   0.00000   0.00000   0.00000   0.00000   1.89520
   A35        1.88572   0.00000   0.00000   0.00000   0.00000   1.88572
   A36        1.89589   0.00000   0.00000   0.00000   0.00000   1.89589
   A37        1.92035   0.00000   0.00000   0.00000   0.00000   1.92035
   A38        1.95217   0.00000   0.00000   0.00000   0.00000   1.95217
   A39        1.93531   0.00000   0.00000   0.00000   0.00000   1.93531
   A40        1.87516   0.00000   0.00000   0.00000   0.00000   1.87516
   A41        1.88933   0.00000   0.00000   0.00000   0.00000   1.88933
   A42        1.88935   0.00000   0.00000   0.00000   0.00000   1.88935
    D1        0.00000   0.00000   0.00000   0.00000   0.00000   0.00000
    D2        2.03182   0.00000   0.00000   0.00000   0.00000   2.03182
    D3       -2.03182   0.00000   0.00000   0.00000   0.00000  -2.03182
    D4       -3.14159   0.00000   0.00000   0.00000   0.00000  -3.14159
    D5       -1.10977   0.00000   0.00000   0.00000   0.00000  -1.10977
    D6        1.10977   0.00000   0.00000   0.00000   0.00000   1.10977
    D7        3.14159   0.00000   0.00000   0.00000   0.00000   3.14159
    D8       -1.11073   0.00000   0.00000   0.00000   0.00000  -1.11073
    D9        1.11073   0.00000   0.00000   0.00000   0.00000   1.11073
   D10       -0.00001   0.00000   0.00000   0.00000   0.00000   0.00000
   D11        2.03086   0.00000   0.00000   0.00000   0.00000   2.03086
   D12       -2.03087   0.00000   0.00000   0.00000   0.00000  -2.03086
   D13        3.14159   0.00000   0.00000   0.00000   0.00000   3.14159
   D14        0.00000   0.00000   0.00000   0.00000   0.00000   0.00000
   D15        0.00000   0.00000   0.00000   0.00000   0.00000   0.00000
   D16       -3.14159   0.00000   0.00000   0.00000   0.00000  -3.14159
   D17       -3.04843   0.00000   0.00000   0.00000   0.00000  -3.04843
   D18       -0.96679   0.00000   0.00000   0.00000   0.00000  -0.96679
   D19        1.14204   0.00000   0.00000   0.00000   0.00000   1.14204
   D20       -1.04208   0.00000   0.00000   0.00000   0.00000  -1.04209
   D21        1.03955   0.00000   0.00000   0.00000   0.00000   1.03955
   D22       -3.13480   0.00000   0.00000   0.00000   0.00000  -3.13480
   D23        1.01761   0.00000   0.00000   0.00000   0.00000   1.01761
   D24        3.09925   0.00000   0.00000   0.00000   0.00000   3.09925
   D25       -1.07510   0.00000   0.00000   0.00000   0.00000  -1.07511
   D26        3.04843   0.00000   0.00000   0.00000   0.00000   3.04843
   D27       -1.14203   0.00000   0.00000   0.00000   0.00000  -1.14204
   D28        0.96680   0.00000   0.00000   0.00000   0.00000   0.96679
   D29        1.04209   0.00000   0.00000   0.00000   0.00000   1.04209
   D30        3.13481   0.00000   0.00000   0.00000   0.00000   3.13480
   D31       -1.03955   0.00000   0.00000   0.00000   0.00000  -1.03955
   D32       -1.01761   0.00000   0.00000   0.00000   0.00000  -1.01761
   D33        1.07511   0.00000   0.00000   0.00000   0.00000   1.07511
   D34       -3.09925   0.00000   0.00000   0.00000   0.00000  -3.09925
   D35        1.15128   0.00000   0.00000   0.00000   0.00000   1.15128
   D36       -3.04920   0.00000   0.00000   0.00000   0.00000  -3.04920
   D37       -0.95957   0.00000   0.00000   0.00000   0.00000  -0.95957
   D38       -3.12615   0.00000   0.00000   0.00000   0.00000  -3.12615
   D39       -1.04343   0.00000   0.00000   0.00000   0.00000  -1.04344
   D40        1.04619   0.00000   0.00000   0.00000   0.00000   1.04619
   D41       -1.07180   0.00000   0.00000   0.00000   0.00000  -1.07180
   D42        1.01091   0.00000   0.00000   0.00000   0.00000   1.01091
   D43        3.10054   0.00000   0.00000   0.00000   0.00000   3.10053
   D44        3.04920   0.00000   0.00000   0.00000   0.00000   3.04920
   D45       -1.15127   0.00000   0.00000   0.00000   0.00000  -1.15128
   D46        0.95958   0.00000   0.00000   0.00000   0.00000   0.95957
   D47        1.04344   0.00000   0.00000   0.00000   0.00000   1.04344
   D48        3.12615   0.00000   0.00000   0.00000   0.00000   3.12615
   D49       -1.04618   0.00000   0.00000   0.00000   0.00000  -1.04619
   D50       -1.01091   0.00000   0.00000   0.00000   0.00000  -1.01091
   D51        1.07180   0.00000   0.00000   0.00000   0.00000   1.07180
   D52       -3.10053   0.00000   0.00000   0.00000   0.00000  -3.10054
         Item               Value     Threshold  Converged?
 Maximum Force            0.000000     0.000015     YES
 RMS     Force            0.000000     0.000010     YES
 Maximum Displacement     0.000010     0.000060     YES
 RMS     Displacement     0.000003     0.000040     YES
 Predicted change in Energy=-8.286211D-13
 Optimization completed.
    -- Stationary point found.
                           ----------------------------
                           !   Optimized Parameters   !
                           ! (Angstroms and Degrees)  !
 --------------------------                            --------------------------
 ! Name  Definition              Value          Derivative Info.                !
 --------------------------------------------------------------------------------
 ! R1    R(1,2)                  1.4826         -DE/DX =    0.0                 !
 ! R2    R(1,8)                  1.4738         -DE/DX =    0.0                 !
 ! R3    R(1,14)                 1.3586         -DE/DX =    0.0                 !
 ! R4    R(2,3)                  1.0909         -DE/DX =    0.0                 !
 ! R5    R(2,4)                  1.5327         -DE/DX =    0.0                 !
 ! R6    R(2,17)                 1.5327         -DE/DX =    0.0                 !
 ! R7    R(4,5)                  1.0924         -DE/DX =    0.0                 !
 ! R8    R(4,6)                  1.0916         -DE/DX =    0.0                 !
 ! R9    R(4,7)                  1.0886         -DE/DX =    0.0                 !
 ! R10   R(8,9)                  1.0929         -DE/DX =    0.0                 !
 ! R11   R(8,10)                 1.5324         -DE/DX =    0.0                 !
 ! R12   R(8,21)                 1.5324         -DE/DX =    0.0                 !
 ! R13   R(10,11)                1.0921         -DE/DX =    0.0                 !
 ! R14   R(10,12)                1.092          -DE/DX =    0.0                 !
 ! R15   R(10,13)                1.091          -DE/DX =    0.0                 !
 ! R16   R(14,15)                1.1058         -DE/DX =    0.0                 !
 ! R17   R(14,16)                1.2187         -DE/DX =    0.0                 !
 ! R18   R(17,18)                1.0924         -DE/DX =    0.0                 !
 ! R19   R(17,19)                1.0886         -DE/DX =    0.0                 !
 ! R20   R(17,20)                1.0916         -DE/DX =    0.0                 !
 ! R21   R(21,22)                1.092          -DE/DX =    0.0                 !
 ! R22   R(21,23)                1.0921         -DE/DX =    0.0                 !
 ! R23   R(21,24)                1.091          -DE/DX =    0.0                 !
 ! A1    A(2,1,8)              119.6596         -DE/DX =    0.0                 !
 ! A2    A(2,1,14)             120.8575         -DE/DX =    0.0                 !
 ! A3    A(8,1,14)             119.4829         -DE/DX =    0.0                 !
 ! A4    A(1,2,3)              105.0941         -DE/DX =    0.0                 !
 ! A5    A(1,2,4)              112.0093         -DE/DX =    0.0                 !
 ! A6    A(1,2,17)             112.0093         -DE/DX =    0.0                 !
 ! A7    A(3,2,4)              107.4953         -DE/DX =    0.0                 !
 ! A8    A(3,2,17)             107.4953         -DE/DX =    0.0                 !
 ! A9    A(4,2,17)             112.2651         -DE/DX =    0.0                 !
 ! A10   A(2,4,5)              109.639          -DE/DX =    0.0                 !
 ! A11   A(2,4,6)              110.9644         -DE/DX =    0.0                 !
 ! A12   A(2,4,7)              110.901          -DE/DX =    0.0                 !
 ! A13   A(5,4,6)              108.0435         -DE/DX =    0.0                 !
 ! A14   A(5,4,7)              108.5871         -DE/DX =    0.0                 !
 ! A15   A(6,4,7)              108.6264         -DE/DX =    0.0                 !
 ! A16   A(1,8,9)              105.0152         -DE/DX =    0.0                 !
 ! A17   A(1,8,10)             112.2403         -DE/DX =    0.0                 !
 ! A18   A(1,8,21)             112.2403         -DE/DX =    0.0                 !
 ! A19   A(9,8,10)             107.3908         -DE/DX =    0.0                 !
 ! A20   A(9,8,21)             107.3907         -DE/DX =    0.0                 !
 ! A21   A(10,8,21)            112.0667         -DE/DX =    0.0                 !
 ! A22   A(8,10,11)            111.8513         -DE/DX =    0.0                 !
 ! A23   A(8,10,12)            110.0279         -DE/DX =    0.0                 !
 ! A24   A(8,10,13)            110.8853         -DE/DX =    0.0                 !
 ! A25   A(11,10,12)           107.439          -DE/DX =    0.0                 !
 ! A26   A(11,10,13)           108.2518         -DE/DX =    0.0                 !
 ! A27   A(12,10,13)           108.2506         -DE/DX =    0.0                 !
 ! A28   A(1,14,15)            112.107          -DE/DX =    0.0                 !
 ! A29   A(1,14,16)            126.415          -DE/DX =    0.0                 !
 ! A30   A(15,14,16)           121.478          -DE/DX =    0.0                 !
 ! A31   A(2,17,18)            109.639          -DE/DX =    0.0                 !
 ! A32   A(2,17,19)            110.901          -DE/DX =    0.0                 !
 ! A33   A(2,17,20)            110.9643         -DE/DX =    0.0                 !
 ! A34   A(18,17,19)           108.5871         -DE/DX =    0.0                 !
 ! A35   A(18,17,20)           108.0435         -DE/DX =    0.0                 !
 ! A36   A(19,17,20)           108.6264         -DE/DX =    0.0                 !
 ! A37   A(8,21,22)            110.0279         -DE/DX =    0.0                 !
 ! A38   A(8,21,23)            111.8513         -DE/DX =    0.0                 !
 ! A39   A(8,21,24)            110.8853         -DE/DX =    0.0                 !
 ! A40   A(22,21,23)           107.439          -DE/DX =    0.0                 !
 ! A41   A(22,21,24)           108.2506         -DE/DX =    0.0                 !
 ! A42   A(23,21,24)           108.2518         -DE/DX =    0.0                 !
 ! D1    D(8,1,2,3)             -0.0002         -DE/DX =    0.0                 !
 ! D2    D(8,1,2,4)            116.4146         -DE/DX =    0.0                 !
 ! D3    D(8,1,2,17)          -116.415          -DE/DX =    0.0                 !
 ! D4    D(14,1,2,3)          -180.0            -DE/DX =    0.0                 !
 ! D5    D(14,1,2,4)           -63.5852         -DE/DX =    0.0                 !
 ! D6    D(14,1,2,17)           63.5853         -DE/DX =    0.0                 !
 ! D7    D(2,1,8,9)            179.9999         -DE/DX =    0.0                 !
 ! D8    D(2,1,8,10)           -63.6402         -DE/DX =    0.0                 !
 ! D9    D(2,1,8,21)            63.64           -DE/DX =    0.0                 !
 ! D10   D(14,1,8,9)            -0.0003         -DE/DX =    0.0                 !
 ! D11   D(14,1,8,10)          116.3596         -DE/DX =    0.0                 !
 ! D12   D(14,1,8,21)         -116.3602         -DE/DX =    0.0                 !
 ! D13   D(2,1,14,15)          179.9999         -DE/DX =    0.0                 !
 ! D14   D(2,1,14,16)           -0.0001         -DE/DX =    0.0                 !
 ! D15   D(8,1,14,15)            0.0002         -DE/DX =    0.0                 !
 ! D16   D(8,1,14,16)         -179.9999         -DE/DX =    0.0                 !
 ! D17   D(1,2,4,5)           -174.6622         -DE/DX =    0.0                 !
 ! D18   D(1,2,4,6)            -55.3931         -DE/DX =    0.0                 !
 ! D19   D(1,2,4,7)             65.434          -DE/DX =    0.0                 !
 ! D20   D(3,2,4,5)            -59.707          -DE/DX =    0.0                 !
 ! D21   D(3,2,4,6)             59.562          -DE/DX =    0.0                 !
 ! D22   D(3,2,4,7)           -179.6109         -DE/DX =    0.0                 !
 ! D23   D(17,2,4,5)            58.3049         -DE/DX =    0.0                 !
 ! D24   D(17,2,4,6)           177.574          -DE/DX =    0.0                 !
 ! D25   D(17,2,4,7)           -61.5989         -DE/DX =    0.0                 !
 ! D26   D(1,2,17,18)          174.6624         -DE/DX =    0.0                 !
 ! D27   D(1,2,17,19)          -65.4338         -DE/DX =    0.0                 !
 ! D28   D(1,2,17,20)           55.3933         -DE/DX =    0.0                 !
 ! D29   D(3,2,17,18)           59.7072         -DE/DX =    0.0                 !
 ! D30   D(3,2,17,19)          179.6111         -DE/DX =    0.0                 !
 ! D31   D(3,2,17,20)          -59.5618         -DE/DX =    0.0                 !
 ! D32   D(4,2,17,18)          -58.3047         -DE/DX =    0.0                 !
 ! D33   D(4,2,17,19)           61.5992         -DE/DX =    0.0                 !
 ! D34   D(4,2,17,20)         -177.5738         -DE/DX =    0.0                 !
 ! D35   D(1,8,10,11)           65.9634         -DE/DX =    0.0                 !
 ! D36   D(1,8,10,12)         -174.706          -DE/DX =    0.0                 !
 ! D37   D(1,8,10,13)          -54.9794         -DE/DX =    0.0                 !
 ! D38   D(9,8,10,11)         -179.115          -DE/DX =    0.0                 !
 ! D39   D(9,8,10,12)          -59.7844         -DE/DX =    0.0                 !
 ! D40   D(9,8,10,13)           59.9422         -DE/DX =    0.0                 !
 ! D41   D(21,8,10,11)         -61.4095         -DE/DX =    0.0                 !
 ! D42   D(21,8,10,12)          57.9211         -DE/DX =    0.0                 !
 ! D43   D(21,8,10,13)         177.6477         -DE/DX =    0.0                 !
 ! D44   D(1,8,21,22)          174.7063         -DE/DX =    0.0                 !
 ! D45   D(1,8,21,23)          -65.9631         -DE/DX =    0.0                 !
 ! D46   D(1,8,21,24)           54.9797         -DE/DX =    0.0                 !
 ! D47   D(9,8,21,22)           59.7847         -DE/DX =    0.0                 !
 ! D48   D(9,8,21,23)          179.1153         -DE/DX =    0.0                 !
 ! D49   D(9,8,21,24)          -59.9419         -DE/DX =    0.0                 !
 ! D50   D(10,8,21,22)         -57.9208         -DE/DX =    0.0                 !
 ! D51   D(10,8,21,23)          61.4098         -DE/DX =    0.0                 !
 ! D52   D(10,8,21,24)        -177.6474         -DE/DX =    0.0                 !
 --------------------------------------------------------------------------------
 GradGradGradGradGradGradGradGradGradGradGradGradGradGradGradGradGradGrad

                          Input orientation:                          
 ---------------------------------------------------------------------
 Center     Atomic     Atomic              Coordinates (Angstroms)
 Number     Number      Type              X           Y           Z
 ---------------------------------------------------------------------
    1          7             0       -0.057708    0.390427   -0.016515
    2          6             0        0.667635   -0.901658    0.034347
    3          1             0       -0.112011   -1.664095    0.065063
    4          6             0        1.499215   -1.143683   -1.230138
    5          1             0        1.939539   -2.142816   -1.194355
    6          1             0        0.877082   -1.080232   -2.124792
    7          1             0        2.302269   -0.413321   -1.312546
    8          6             0       -1.531496    0.399967   -0.016041
    9          1             0       -1.807827    1.456563   -0.057815
   10          6             0       -2.116280   -0.275946   -1.260785
   11          1             0       -1.894894   -1.345103   -1.284636
   12          1             0       -3.202773   -0.166415   -1.270250
   13          1             0       -1.719427    0.175553   -2.171200
   14          6             0        0.618542    1.567766   -0.063639
   15          1             0       -0.062879    2.438014   -0.097785
   16          8             0        1.829223    1.706901   -0.069864
   17          6             0        1.500694   -1.042739    1.313071
   18          1             0        1.941025   -2.041584    1.356077
   19          1             0        2.303806   -0.308177    1.336402
   20          1             0        0.879595   -0.908553    2.200603
   21          6             0       -2.114811   -0.175146    1.279029
   22          1             0       -3.201298   -0.065164    1.281037
   23          1             0       -1.893344   -1.239058    1.387284
   24          1             0       -1.716932    0.347070    2.150340
 ---------------------------------------------------------------------
                    Distance matrix (angstroms):
                    1          2          3          4          5
     1  N    0.000000
     2  C    1.482631   0.000000
     3  H    2.056858   1.090917   0.000000
     4  C    2.500077   1.532653   2.131765   0.000000
     5  H    3.434185   2.160538   2.454418   1.092443   0.000000
     6  H    2.735234   2.176612   2.472785   1.091550   1.767375
     7  H    2.809840   2.173621   3.048113   1.088630   1.771072
     8  C    1.473819   2.555962   2.506365   3.611384   4.461194
     9  H    2.049700   3.420177   3.553786   4.367167   5.318835
    10  C    2.495993   3.133538   2.775233   3.718294   4.465342
    11  H    2.827622   2.915975   2.258786   3.400517   3.917573
    12  H    3.431234   4.150014   3.684958   4.802641   5.509564
    13  H    2.729496   3.423870   3.311943   3.603560   4.440394
    14  C    1.358551   2.471855   3.315900   3.080303   4.097801
    15  H    2.049205   3.421187   4.105633   4.068282   5.118217
    16  O    2.301403   2.857399   3.892326   3.095314   4.012103
    17  C    2.500076   1.532653   2.131765   2.545212   2.773074
    18  H    3.434184   2.160538   2.454419   2.773073   2.552441
    19  H    2.809837   2.173620   3.048112   2.816481   3.146954
    20  H    2.735233   2.176612   2.472783   3.494167   3.764655
    21  C    2.495993   3.133537   2.775228   4.505016   5.140730
    22  H    3.431234   4.150012   3.684951   5.437281   6.072266
    23  H    2.827620   2.915972   2.258777   4.285960   4.708783
    24  H    2.729499   3.423872   3.311938   4.898324   5.545836
                    6          7          8          9         10
     6  H    0.000000
     7  H    1.770783   0.000000
     8  C    3.526906   4.127968   0.000000
     9  H    4.232784   4.686545   1.092932   0.000000
    10  C    3.217701   4.420987   1.532390   2.131635   0.000000
    11  H    2.908585   4.299439   2.187844   3.059739   1.092097
    12  H    4.267379   5.510739   2.164948   2.459661   1.092042
    13  H    2.884616   4.154287   2.174946   2.472892   1.090963
    14  C    3.365574   2.884340   2.447178   2.428923   3.508801
    15  H    4.167774   3.898677   2.513395   2.002420   3.596471
    16  O    3.591297   2.502673   3.606301   3.645675   4.573507
    17  C    3.494167   2.816480   3.611387   4.367167   4.505020
    18  H    3.764655   3.146949   4.461197   5.318836   5.140736
    19  H    3.822496   2.651035   4.127967   4.686543   5.126751
    20  H    4.328802   3.822496   3.526910   4.232785   4.621327
    21  C    4.621320   5.126752   1.532389   2.131635   2.541814
    22  H    5.409549   6.094025   2.164947   2.459662   2.771742
    23  H    4.476066   5.057084   2.187843   3.059738   2.826580
    24  H    5.200274   5.359454   2.174946   2.472890   3.490473
                   11         12         13         14         15
    11  H    0.000000
    12  H    1.760699   0.000000
    13  H    1.768948   1.768889   0.000000
    14  C    4.036458   4.366434   3.441826   0.000000
    15  H    4.367707   4.244604   3.487396   1.105817   0.000000
    16  O    4.965827   5.501929   4.399267   1.218666   2.028634
    17  C    4.285968   5.437288   4.898322   3.080302   4.068282
    18  H    4.708793   6.072275   5.545836   4.097800   5.118216
    19  H    5.057088   6.094026   5.359447   2.884336   3.898674
    20  H    4.476076   5.409559   5.200276   3.365575   4.167776
    21  C    2.826578   2.771744   3.490473   3.508805   3.596476
    22  H    3.150812   2.553296   3.764548   4.366439   4.244611
    23  H    2.674024   3.150818   3.833299   4.036460   4.367710
    24  H    3.833299   3.764549   4.324943   3.441836   3.487405
                   16         17         18         19         20
    16  O    0.000000
    17  C    3.095313   0.000000
    18  H    4.012100   1.092443   0.000000
    19  H    2.502670   1.088630   1.771072   0.000000
    20  H    3.591297   1.091550   1.767375   1.770783   0.000000
    21  C    4.573512   3.718299   4.465348   4.420992   3.217709
    22  H    5.501935   4.802646   5.509570   5.510744   4.267388
    23  H    4.965829   3.400521   3.917577   4.299442   2.908593
    24  H    4.399279   3.603568   4.440402   4.154296   2.884626
                   21         22         23         24
    21  C    0.000000
    22  H    1.092042   0.000000
    23  H    1.092097   1.760699   0.000000
    24  H    1.090963   1.768889   1.768948   0.000000
 Stoichiometry    C7H15NO
 Framework group  C1[X(C7H15NO)]
 Deg. of freedom    66
 Full point group                 C1
 Largest Abelian subgroup         C1      NOp   1
 Largest concise Abelian subgroup C1      NOp   1
                         Standard orientation:                         
 ---------------------------------------------------------------------
 Center     Atomic     Atomic              Coordinates (Angstroms)
 Number     Number      Type              X           Y           Z
 ---------------------------------------------------------------------
    1          7             0        0.057684    0.390711   -0.000004
    2          6             0       -0.667453   -0.902490    0.000003
    3          1             0        0.112314   -1.665421    0.000004
    4          6             0       -1.499740   -1.094303    1.272612
    5          1             0       -1.939907   -2.094138    1.276231
    6          1             0       -0.878138   -0.995316    2.164405
    7          1             0       -2.302941   -0.361374    1.325521
    8          6             0        1.531471    0.400459   -0.000004
    9          1             0        1.807634    1.457924   -0.000011
   10          6             0        2.115619   -0.225458    1.270908
   11          1             0        1.894364   -1.292862    1.337020
   12          1             0        3.202092   -0.115465    1.276651
   13          1             0        1.718173    0.261734    2.162469
   14          6             0       -0.618753    1.568885   -0.000007
   15          1             0        0.062530    2.439911   -0.000011
   16          8             0       -1.829456    1.707965   -0.000006
   17          6             0       -1.499745   -1.094312   -1.272601
   18          1             0       -1.939916   -2.094146   -1.276209
   19          1             0       -2.302944   -0.361381   -1.325514
   20          1             0       -0.878147   -0.995336   -2.164397
   21          6             0        2.115621   -0.225476   -1.270905
   22          1             0        3.202094   -0.115488   -1.276645
   23          1             0        1.894362   -1.292880   -1.337004
   24          1             0        1.718180    0.261706   -2.162474
 ---------------------------------------------------------------------
 Rotational constants (GHZ):      1.9825320      1.2017194      1.1106420

 **********************************************************************

            Population analysis using the SCF density.

 **********************************************************************

 Orbital symmetries:
       Occupied  (A) (A) (A) (A) (A) (A) (A) (A) (A) (A) (A) (A)
                 (A) (A) (A) (A) (A) (A) (A) (A) (A) (A) (A) (A)
                 (A) (A) (A) (A) (A) (A) (A) (A) (A) (A) (A) (A)
       Virtual   (A) (A) (A) (A) (A) (A) (A) (A) (A) (A) (A) (A)
                 (A) (A) (A) (A) (A) (A) (A) (A) (A) (A) (A) (A)
                 (A) (A) (A) (A) (A) (A) (A) (A) (A) (A) (A) (A)
                 (A) (A) (A) (A) (A) (A) (A) (A) (A) (A) (A) (A)
                 (A) (A) (A) (A) (A) (A) (A) (A) (A) (A) (A) (A)
                 (A) (A) (A) (A) (A) (A) (A) (A) (A) (A) (A) (A)
                 (A) (A) (A) (A) (A) (A) (A) (A) (A) (A) (A) (A)
                 (A) (A) (A) (A) (A) (A) (A) (A) (A) (A) (A) (A)
                 (A) (A) (A) (A) (A) (A) (A) (A) (A) (A) (A) (A)
                 (A) (A) (A) (A) (A) (A) (A) (A) (A) (A) (A) (A)
                 (A) (A) (A) (A) (A) (A) (A) (A) (A) (A) (A) (A)
                 (A) (A) (A) (A) (A) (A) (A) (A) (A) (A) (A) (A)
                 (A) (A) (A) (A) (A) (A) (A) (A) (A) (A) (A) (A)
                 (A) (A) (A) (A) (A) (A) (A) (A) (A) (A) (A) (A)
                 (A) (A) (A) (A) (A) (A) (A) (A) (A) (A) (A) (A)
                 (A) (A) (A) (A) (A) (A) (A) (A) (A) (A) (A) (A)
                 (A) (A) (A) (A) (A) (A) (A) (A) (A) (A) (A) (A)
                 (A) (A) (A) (A) (A) (A) (A) (A) (A) (A) (A) (A)
                 (A) (A) (A) (A) (A) (A) (A) (A) (A)
 The electronic state is 1-A.
 Alpha  occ. eigenvalues --  -19.08816 -14.34713 -10.26248 -10.22937 -10.21877
 Alpha  occ. eigenvalues --  -10.17699 -10.17698 -10.15928 -10.15928  -1.03491
 Alpha  occ. eigenvalues --   -0.94438  -0.80580  -0.77380  -0.70782  -0.68929
 Alpha  occ. eigenvalues --   -0.64622  -0.62066  -0.54983  -0.51956  -0.47016
 Alpha  occ. eigenvalues --   -0.45922  -0.45918  -0.44268  -0.42528  -0.41919
 Alpha  occ. eigenvalues --   -0.40869  -0.40251  -0.39695  -0.37785  -0.37191
 Alpha  occ. eigenvalues --   -0.36384  -0.35304  -0.35053  -0.34547  -0.25397
 Alpha  occ. eigenvalues --   -0.24895
 Alpha virt. eigenvalues --    0.01413   0.01853   0.04277   0.05647   0.06588
 Alpha virt. eigenvalues --    0.07081   0.08057   0.09919   0.10261   0.11106
 Alpha virt. eigenvalues --    0.11396   0.11938   0.12607   0.13453   0.13788
 Alpha virt. eigenvalues --    0.14521   0.15723   0.16074   0.16182   0.17200
 Alpha virt. eigenvalues --    0.17455   0.19389   0.19717   0.20951   0.21886
 Alpha virt. eigenvalues --    0.23785   0.25375   0.26138   0.26760   0.29563
 Alpha virt. eigenvalues --    0.29592   0.30415   0.31164   0.32572   0.34186
 Alpha virt. eigenvalues --    0.35757   0.36180   0.37918   0.38696   0.39680
 Alpha virt. eigenvalues --    0.40017   0.40410   0.42070   0.42423   0.43124
 Alpha virt. eigenvalues --    0.43982   0.44386   0.45336   0.45428   0.45752
 Alpha virt. eigenvalues --    0.46310   0.47110   0.47697   0.48708   0.49026
 Alpha virt. eigenvalues --    0.49962   0.51066   0.51676   0.52824   0.54894
 Alpha virt. eigenvalues --    0.55246   0.57683   0.58057   0.59678   0.62399
 Alpha virt. eigenvalues --    0.63042   0.64158   0.67060   0.68725   0.69926
 Alpha virt. eigenvalues --    0.72827   0.74253   0.78616   0.82445   0.93153
 Alpha virt. eigenvalues --    1.10697   1.15697   1.22507   1.23579   1.24342
 Alpha virt. eigenvalues --    1.25820   1.26471   1.27178   1.28103   1.29462
 Alpha virt. eigenvalues --    1.30102   1.32413   1.32707   1.33838   1.34078
 Alpha virt. eigenvalues --    1.36429   1.36695   1.38320   1.39311   1.39420
 Alpha virt. eigenvalues --    1.41917   1.42810   1.42840   1.44331   1.44653
 Alpha virt. eigenvalues --    1.45880   1.47794   1.50911   1.50963   1.51379
 Alpha virt. eigenvalues --    1.54398   1.55163   1.57277   1.59865   1.60515
 Alpha virt. eigenvalues --    1.61237   1.63078   1.63355   1.64070   1.65789
 Alpha virt. eigenvalues --    1.67495   1.70604   1.71088   1.71265   1.76054
 Alpha virt. eigenvalues --    1.76826   1.78468   1.79436   1.79482   1.79701
 Alpha virt. eigenvalues --    1.79942   1.81189   1.81633   1.81784   1.82532
 Alpha virt. eigenvalues --    1.86257   1.87452   1.90744   1.92007   1.92017
 Alpha virt. eigenvalues --    1.95101   1.96846   1.98678   1.99137   2.03822
 Alpha virt. eigenvalues --    2.06449   2.06825   2.09482   2.15579   2.19944
 Alpha virt. eigenvalues --    2.21335   2.22546   2.22606   2.24667   2.28436
 Alpha virt. eigenvalues --    2.29685   2.31337   2.31584   2.33204   2.34841
 Alpha virt. eigenvalues --    2.37288   2.39140   2.40155   2.40970   2.45325
 Alpha virt. eigenvalues --    2.45769   2.47009   2.48801   2.50788   2.53183
 Alpha virt. eigenvalues --    2.54388   2.56834   2.56857   2.59564   2.61515
 Alpha virt. eigenvalues --    2.63535   2.64707   2.65633   2.66315   2.68405
 Alpha virt. eigenvalues --    2.69037   2.69996   2.71830   2.72989   2.74021
 Alpha virt. eigenvalues --    2.74825   2.76166   2.77023   2.79384   2.81410
 Alpha virt. eigenvalues --    2.82610   2.84757   2.84784   2.86930   2.93503
 Alpha virt. eigenvalues --    2.95694   3.06031   3.06770   3.12727   3.15330
 Alpha virt. eigenvalues --    3.17865   3.18941   3.23990   3.27744   3.31895
 Alpha virt. eigenvalues --    3.32507   3.34067   3.34283   3.34940   3.36114
 Alpha virt. eigenvalues --    3.37771   3.40063   3.40859   3.41263   3.43296
 Alpha virt. eigenvalues --    3.43605   3.50305   3.53597   3.77279   3.80176
 Alpha virt. eigenvalues --    4.28984  21.98940  22.06363  22.08048  22.08500
 Alpha virt. eigenvalues --   22.08519  22.16288  22.20139  32.00324  43.58148
          Condensed to atoms (all electrons):
              1          2          3          4          5          6
     1  N    7.389702  -0.040361  -0.075196   0.007093   0.008163   0.001016
     2  C   -0.040361   5.288275   0.471479   0.184145  -0.039036  -0.037135
     3  H   -0.075196   0.471479   0.584140  -0.063202  -0.004125  -0.003862
     4  C    0.007093   0.184145  -0.063202   5.228951   0.394198   0.381402
     5  H    0.008163  -0.039036  -0.004125   0.394198   0.575920  -0.026073
     6  H    0.001016  -0.037135  -0.003862   0.381402  -0.026073   0.581315
     7  H   -0.017902  -0.016948   0.007364   0.402675  -0.024320  -0.022579
     8  C    0.182619   0.014014   0.035713  -0.021020   0.000971  -0.003226
     9  H   -0.072350   0.013365   0.000434  -0.001387   0.000046  -0.000025
    10  C   -0.070152  -0.025978  -0.019200   0.013374  -0.000610   0.000694
    11  H   -0.011234   0.007016   0.002567  -0.005113   0.000372  -0.000764
    12  H    0.011157   0.000335  -0.000088  -0.000086   0.000010   0.000234
    13  H    0.009831  -0.003479   0.000838  -0.000708   0.000050   0.000445
    14  C    0.235035   0.012346   0.009157  -0.029624   0.001798  -0.000074
    15  H   -0.159940   0.028745  -0.000112  -0.006641   0.000123   0.000278
    16  O   -0.163232   0.096547   0.000874  -0.045101   0.000765   0.000155
    17  C    0.007093   0.184144  -0.063202  -0.052997  -0.008240   0.013753
    18  H    0.008163  -0.039036  -0.004125  -0.008240   0.001841  -0.000041
    19  H   -0.017902  -0.016948   0.007364  -0.017283   0.000953   0.000003
    20  H    0.001016  -0.037135  -0.003863   0.013753  -0.000041  -0.000629
    21  C   -0.070152  -0.025979  -0.019200   0.003359   0.000042   0.000706
    22  H    0.011157   0.000335  -0.000088   0.000019  -0.000004  -0.000023
    23  H   -0.011235   0.007016   0.002567   0.000586   0.000028  -0.000068
    24  H    0.009831  -0.003479   0.000838  -0.000085  -0.000009  -0.000022
              7          8          9         10         11         12
     1  N   -0.017902   0.182619  -0.072350  -0.070152  -0.011234   0.011157
     2  C   -0.016948   0.014014   0.013365  -0.025978   0.007016   0.000335
     3  H    0.007364   0.035713   0.000434  -0.019200   0.002567  -0.000088
     4  C    0.402675  -0.021020  -0.001387   0.013374  -0.005113  -0.000086
     5  H   -0.024320   0.000971   0.000046  -0.000610   0.000372   0.000010
     6  H   -0.022579  -0.003226  -0.000025   0.000694  -0.000764   0.000234
     7  H    0.497837   0.001723   0.000083  -0.000647   0.000079  -0.000009
     8  C    0.001723   5.203830   0.479436   0.220216  -0.007302  -0.040427
     9  H    0.000083   0.479436   0.591597  -0.067078   0.009293  -0.005308
    10  C   -0.000647   0.220216  -0.067078   5.249080   0.376789   0.379308
    11  H    0.000079  -0.007302   0.009293   0.376789   0.574664  -0.027787
    12  H   -0.000009  -0.040427  -0.005308   0.379308  -0.027787   0.564576
    13  H    0.000048  -0.043527  -0.004542   0.392200  -0.024985  -0.017844
    14  C    0.001344  -0.039489  -0.014081  -0.003540  -0.001577   0.000655
    15  H    0.001287  -0.010937   0.018077  -0.003226  -0.000087   0.000127
    16  O    0.017165   0.005009   0.000279   0.000062  -0.000017   0.000002
    17  C   -0.017283  -0.021020  -0.001387   0.003359   0.000586   0.000019
    18  H    0.000953   0.000971   0.000046   0.000042   0.000028  -0.000004
    19  H    0.005504   0.001723   0.000083  -0.000407  -0.000006   0.000003
    20  H    0.000003  -0.003226  -0.000025   0.000706  -0.000068  -0.000023
    21  C   -0.000407   0.220217  -0.067077  -0.137563  -0.012339   0.010534
    22  H    0.000003  -0.040427  -0.005308   0.010534  -0.000419  -0.001269
    23  H   -0.000006  -0.007302   0.009293  -0.012339   0.005615  -0.000419
    24  H    0.000016  -0.043527  -0.004542   0.016909  -0.000439  -0.000526
             13         14         15         16         17         18
     1  N    0.009831   0.235035  -0.159940  -0.163232   0.007093   0.008163
     2  C   -0.003479   0.012346   0.028745   0.096547   0.184144  -0.039036
     3  H    0.000838   0.009157  -0.000112   0.000874  -0.063202  -0.004125
     4  C   -0.000708  -0.029624  -0.006641  -0.045101  -0.052997  -0.008240
     5  H    0.000050   0.001798   0.000123   0.000765  -0.008240   0.001841
     6  H    0.000445  -0.000074   0.000278   0.000155   0.013753  -0.000041
     7  H    0.000048   0.001344   0.001287   0.017165  -0.017283   0.000953
     8  C   -0.043527  -0.039489  -0.010937   0.005009  -0.021020   0.000971
     9  H   -0.004542  -0.014081   0.018077   0.000279  -0.001387   0.000046
    10  C    0.392200  -0.003540  -0.003226   0.000062   0.003359   0.000042
    11  H   -0.024985  -0.001577  -0.000087  -0.000017   0.000586   0.000028
    12  H   -0.017844   0.000655   0.000127   0.000002   0.000019  -0.000004
    13  H    0.545509   0.000715   0.000093  -0.000293  -0.000085  -0.000009
    14  C    0.000715   4.631054   0.419518   0.587662  -0.029624   0.001798
    15  H    0.000093   0.419518   0.729031  -0.054588  -0.006641   0.000123
    16  O   -0.000293   0.587662  -0.054588   7.957158  -0.045101   0.000765
    17  C   -0.000085  -0.029624  -0.006641  -0.045101   5.228952   0.394198
    18  H   -0.000009   0.001798   0.000123   0.000765   0.394198   0.575921
    19  H    0.000016   0.001344   0.001287   0.017165   0.402675  -0.024320
    20  H   -0.000022  -0.000074   0.000278   0.000155   0.381402  -0.026073
    21  C    0.016909  -0.003540  -0.003226   0.000062   0.013373  -0.000610
    22  H   -0.000526   0.000655   0.000127   0.000002  -0.000086   0.000010
    23  H   -0.000439  -0.001577  -0.000087  -0.000017  -0.005113   0.000372
    24  H   -0.000592   0.000715   0.000093  -0.000293  -0.000708   0.000050
             19         20         21         22         23         24
     1  N   -0.017902   0.001016  -0.070152   0.011157  -0.011235   0.009831
     2  C   -0.016948  -0.037135  -0.025979   0.000335   0.007016  -0.003479
     3  H    0.007364  -0.003863  -0.019200  -0.000088   0.002567   0.000838
     4  C   -0.017283   0.013753   0.003359   0.000019   0.000586  -0.000085
     5  H    0.000953  -0.000041   0.000042  -0.000004   0.000028  -0.000009
     6  H    0.000003  -0.000629   0.000706  -0.000023  -0.000068  -0.000022
     7  H    0.005504   0.000003  -0.000407   0.000003  -0.000006   0.000016
     8  C    0.001723  -0.003226   0.220217  -0.040427  -0.007302  -0.043527
     9  H    0.000083  -0.000025  -0.067077  -0.005308   0.009293  -0.004542
    10  C   -0.000407   0.000706  -0.137563   0.010534  -0.012339   0.016909
    11  H   -0.000006  -0.000068  -0.012339  -0.000419   0.005615  -0.000439
    12  H    0.000003  -0.000023   0.010534  -0.001269  -0.000419  -0.000526
    13  H    0.000016  -0.000022   0.016909  -0.000526  -0.000439  -0.000592
    14  C    0.001344  -0.000074  -0.003540   0.000655  -0.001577   0.000715
    15  H    0.001287   0.000278  -0.003226   0.000127  -0.000087   0.000093
    16  O    0.017165   0.000155   0.000062   0.000002  -0.000017  -0.000293
    17  C    0.402675   0.381402   0.013373  -0.000086  -0.005113  -0.000708
    18  H   -0.024320  -0.026073  -0.000610   0.000010   0.000372   0.000050
    19  H    0.497837  -0.022579  -0.000647  -0.000009   0.000079   0.000048
    20  H   -0.022579   0.581315   0.000694   0.000234  -0.000764   0.000445
    21  C   -0.000647   0.000694   5.249078   0.379308   0.376790   0.392200
    22  H   -0.000009   0.000234   0.379308   0.564576  -0.027788  -0.017845
    23  H    0.000079  -0.000764   0.376790  -0.027788   0.574664  -0.024985
    24  H    0.000048   0.000445   0.392200  -0.017845  -0.024985   0.545509
 Mulliken atomic charges:
              1
     1  N   -0.172217
     2  C   -0.022246
     3  H    0.132926
     4  C   -0.378068
     5  H    0.117178
     6  H    0.114521
     7  H    0.164019
     8  C   -0.085010
     9  H    0.121077
    10  C   -0.322531
    11  H    0.115130
    12  H    0.126829
    13  H    0.130398
    14  C    0.219400
    15  H    0.046301
    16  O   -0.375186
    17  C   -0.378068
    18  H    0.117178
    19  H    0.164019
    20  H    0.114521
    21  C   -0.322531
    22  H    0.126829
    23  H    0.115130
    24  H    0.130398
 Sum of Mulliken charges=   0.00000
 Atomic charges with hydrogens summed into heavy atoms:
              1
     1  N   -0.172217
     2  C    0.110681
     3  H    0.000000
     4  C    0.017650
     5  H    0.000000
     6  H    0.000000
     7  H    0.000000
     8  C    0.036067
     9  H    0.000000
    10  C    0.049826
    11  H    0.000000
    12  H    0.000000
    13  H    0.000000
    14  C    0.265701
    15  H    0.000000
    16  O   -0.375186
    17  C    0.017650
    18  H    0.000000
    19  H    0.000000
    20  H    0.000000
    21  C    0.049826
    22  H    0.000000
    23  H    0.000000
    24  H    0.000000
 Sum of Mulliken charges=   0.00000
 APT atomic charges:
              1
     1  N   -0.810261
     2  C    0.388654
     3  H   -0.041915
     4  C   -0.002940
     5  H   -0.016447
     6  H   -0.017089
     7  H    0.031617
     8  C    0.434465
     9  H   -0.040697
    10  C   -0.001761
    11  H   -0.004707
    12  H   -0.017415
    13  H   -0.007247
    14  C    1.005826
    15  H   -0.048865
    16  O   -0.815228
    17  C   -0.002940
    18  H   -0.016447
    19  H    0.031617
    20  H   -0.017089
    21  C   -0.001761
    22  H   -0.017415
    23  H   -0.004707
    24  H   -0.007247
 Sum of APT charges=   0.00000
 APT Atomic charges with hydrogens summed into heavy atoms:
              1
     1  N   -0.810261
     2  C    0.346739
     3  H    0.000000
     4  C   -0.004859
     5  H    0.000000
     6  H    0.000000
     7  H    0.000000
     8  C    0.393767
     9  H    0.000000
    10  C   -0.031131
    11  H    0.000000
    12  H    0.000000
    13  H    0.000000
    14  C    0.956961
    15  H    0.000000
    16  O   -0.815228
    17  C   -0.004859
    18  H    0.000000
    19  H    0.000000
    20  H    0.000000
    21  C   -0.031130
    22  H    0.000000
    23  H    0.000000
    24  H    0.000000
 Sum of APT charges=   0.00000
 Electronic spatial extent (au):  <R**2>=  1346.8004
 Charge=     0.0000 electrons
 Dipole moment (field-independent basis, Debye):
    X=     3.6940    Y=    -1.9474    Z=     0.0000  Tot=     4.1759
 Quadrupole moment (field-independent basis, Debye-Ang):
   XX=   -62.1382   YY=   -59.8975   ZZ=   -58.2361
   XY=     7.0392   XZ=     0.0000   YZ=     0.0000
 Traceless Quadrupole moment (field-independent basis, Debye-Ang):
   XX=    -2.0476   YY=     0.1931   ZZ=     1.8545
   XY=     7.0392   XZ=     0.0000   YZ=     0.0000
 Octapole moment (field-independent basis, Debye-Ang**2):
  XXX=    13.6731  YYY=    -0.2318  ZZZ=    -0.0001  XYY=     9.6011
  XXY=   -10.1548  XXZ=     0.0000  XZZ=    -1.3701  YZZ=     3.6921
  YYZ=     0.0000  XYZ=     0.0000
 Hexadecapole moment (field-independent basis, Debye-Ang**3):
 XXXX=  -956.2541 YYYY=  -467.4193 ZZZZ=  -417.5199 XXXY=    21.8386
 XXXZ=    -0.0001 YYYX=    18.5071 YYYZ=    -0.0001 ZZZX=     0.0000
 ZZZY=     0.0000 XXYY=  -261.5740 XXZZ=  -232.6372 YYZZ=  -150.5877
 XXYZ=     0.0000 YYXZ=    -0.0001 ZZXY=    -3.7396
 N-N= 4.980339429522D+02 E-N=-1.939938580929D+03  KE= 4.038045525014D+02
  Exact polarizability: 105.470  -0.530  91.952   0.000   0.000  85.392
 Approx polarizability: 146.834  -7.521 133.257   0.000   0.000 114.024
 Rotating derivatives to standard orientation.
 Full mass-weighted force constant matrix:
 Low frequencies ---  -10.0131    0.0003    0.0007    0.0010    7.6528   16.7545
 Low frequencies ---   72.7496   86.2398  146.2117
 Diagonal vibrational polarizability:
        8.0035415      10.4383744      13.0799544
 Harmonic frequencies (cm**-1), IR intensities (KM/Mole), Raman scattering
 activities (A**4/AMU), depolarization ratios for plane and unpolarized
 incident light, reduced masses (AMU), force constants (mDyne/A),
 and normal coordinates:
                     1                      2                      3
                     A                      A                      A
 Frequencies --    72.6793                86.1864               146.2061
 Red. masses --     2.9840                 2.7901                 3.0836
 Frc consts  --     0.0093                 0.0122                 0.0388
 IR Inten    --     1.0417                 0.4741                 0.3811
 Atom AN      X      Y      Z        X      Y      Z        X      Y      Z
   1   7     0.00   0.00  -0.08     0.00   0.00  -0.09     0.00   0.00  -0.17
   2   6     0.00   0.00  -0.09     0.00   0.00  -0.06     0.00   0.00  -0.02
   3   1     0.00   0.00  -0.15     0.00   0.00  -0.23     0.00   0.00   0.09
   4   6     0.06  -0.06  -0.06     0.20  -0.06   0.07    -0.02   0.16  -0.01
   5   1     0.08  -0.07  -0.08     0.18  -0.05   0.08     0.08   0.12   0.17
   6   1     0.09  -0.08  -0.08     0.34  -0.12  -0.03    -0.06   0.39  -0.01
   7   1     0.04  -0.08   0.00     0.22  -0.05   0.23    -0.09   0.10  -0.17
   8   6     0.00   0.00  -0.06     0.00   0.00   0.04     0.00   0.00  -0.05
   9   1     0.00   0.00  -0.24     0.00   0.00   0.11     0.00   0.00   0.03
  10   6    -0.03   0.21   0.06    -0.11  -0.06   0.05    -0.13  -0.06  -0.01
  11   1    -0.09   0.24   0.26    -0.10  -0.07  -0.03    -0.07  -0.07  -0.11
  12   1    -0.03   0.16   0.05    -0.11  -0.05   0.16    -0.14   0.01   0.14
  13   1    -0.02   0.40  -0.04    -0.19  -0.12   0.05    -0.27  -0.14  -0.03
  14   6     0.00   0.00   0.05     0.00   0.00  -0.08     0.00   0.00   0.02
  15   1     0.00   0.00   0.06     0.00   0.00  -0.09     0.00   0.00  -0.01
  16   8     0.00   0.00   0.16     0.00   0.00  -0.07     0.00   0.00   0.20
  17   6    -0.06   0.06  -0.06    -0.20   0.06   0.07     0.02  -0.16  -0.01
  18   1    -0.08   0.07  -0.08    -0.18   0.05   0.08    -0.08  -0.12   0.17
  19   1    -0.04   0.08   0.00    -0.22   0.05   0.23     0.09  -0.10  -0.17
  20   1    -0.09   0.08  -0.08    -0.34   0.12  -0.03     0.06  -0.39  -0.01
  21   6     0.03  -0.21   0.06     0.11   0.06   0.05     0.13   0.06  -0.01
  22   1     0.03  -0.16   0.05     0.11   0.05   0.16     0.14  -0.01   0.14
  23   1     0.09  -0.24   0.26     0.10   0.07  -0.03     0.07   0.07  -0.11
  24   1     0.02  -0.40  -0.04     0.19   0.12   0.05     0.27   0.14  -0.03
                     4                      5                      6
                     A                      A                      A
 Frequencies --   205.0952               218.6643               227.1229
 Red. masses --     2.3256                 1.0529                 1.0803
 Frc consts  --     0.0576                 0.0297                 0.0328
 IR Inten    --     2.0070                 0.1000                 0.0014
 Atom AN      X      Y      Z        X      Y      Z        X      Y      Z
   1   7    -0.03   0.07   0.00     0.00   0.00   0.01     0.00   0.00  -0.01
   2   6     0.07   0.03   0.00     0.00   0.00   0.00     0.00   0.00  -0.01
   3   1     0.14   0.10   0.00     0.00   0.00  -0.02     0.00   0.00   0.00
   4   6     0.12  -0.08   0.01     0.01  -0.03   0.00     0.00   0.04   0.00
   5   1     0.34  -0.18   0.06     0.33  -0.18   0.16    -0.13   0.09  -0.04
   6   1     0.11   0.10   0.00    -0.05   0.32   0.01     0.03  -0.09  -0.01
   7   1    -0.04  -0.25  -0.01    -0.22  -0.28  -0.14     0.10   0.14   0.05
   8   6    -0.03   0.00   0.00     0.00   0.00   0.01     0.00   0.00   0.00
   9   1     0.05  -0.02   0.00     0.00   0.00   0.02     0.00   0.00   0.02
  10   6    -0.12  -0.06   0.01     0.00  -0.01   0.00    -0.03  -0.03   0.00
  11   1    -0.32  -0.02   0.05    -0.13   0.02   0.07    -0.37   0.05   0.15
  12   1    -0.10  -0.27  -0.01     0.02  -0.16  -0.07     0.01  -0.39  -0.15
  13   1    -0.02   0.04   0.00     0.13   0.08   0.01     0.24   0.20  -0.01
  14   6    -0.01   0.09   0.00     0.00   0.00  -0.01     0.00   0.00   0.01
  15   1     0.02   0.07   0.00     0.00   0.00  -0.01     0.00   0.00   0.05
  16   8    -0.01   0.12   0.00     0.00   0.00  -0.02     0.00   0.00   0.00
  17   6     0.12  -0.08  -0.01    -0.01   0.03   0.00     0.00  -0.04   0.00
  18   1     0.34  -0.18  -0.06    -0.33   0.18   0.16     0.13  -0.09  -0.04
  19   1    -0.04  -0.25   0.01     0.22   0.28  -0.14    -0.10  -0.14   0.05
  20   1     0.11   0.10   0.00     0.05  -0.32   0.01    -0.03   0.09  -0.01
  21   6    -0.12  -0.06  -0.01     0.00   0.01   0.00     0.03   0.03   0.00
  22   1    -0.10  -0.27   0.01    -0.02   0.16  -0.07    -0.01   0.39  -0.15
  23   1    -0.32  -0.02  -0.05     0.13  -0.02   0.07     0.37  -0.05   0.15
  24   1    -0.02   0.04   0.00    -0.13  -0.08   0.01    -0.24  -0.20  -0.01
                     7                      8                      9
                     A                      A                      A
 Frequencies --   233.3704               246.3225               255.5157
 Red. masses --     2.5342                 1.1517                 1.3413
 Frc consts  --     0.0813                 0.0412                 0.0516
 IR Inten    --     6.0504                 0.1253                 1.2793
 Atom AN      X      Y      Z        X      Y      Z        X      Y      Z
   1   7    -0.04  -0.04   0.00     0.01   0.00   0.00     0.00   0.04   0.00
   2   6    -0.03  -0.06   0.00    -0.02   0.02   0.00     0.02   0.04   0.00
   3   1     0.00  -0.03   0.00    -0.03   0.01   0.00     0.03   0.05   0.00
   4   6    -0.06  -0.13  -0.03    -0.05   0.02  -0.02     0.05   0.04   0.02
   5   1     0.01  -0.16  -0.07     0.27  -0.12   0.15     0.07   0.03   0.05
   6   1    -0.11  -0.11   0.01    -0.15   0.41   0.01     0.08   0.07   0.00
   7   1    -0.11  -0.18  -0.05    -0.28  -0.22  -0.23     0.04   0.03   0.03
   8   6    -0.03  -0.01   0.00     0.02   0.00   0.00    -0.01   0.00   0.00
   9   1    -0.09   0.01   0.00     0.01   0.00   0.00     0.02  -0.01   0.00
  10   6     0.02   0.05   0.00     0.04   0.00  -0.01    -0.02  -0.07  -0.02
  11   1     0.33  -0.02  -0.11     0.05  -0.01  -0.01     0.27  -0.14  -0.27
  12   1    -0.01   0.37   0.10     0.04   0.01  -0.02    -0.05   0.24   0.15
  13   1    -0.19  -0.13   0.00     0.05  -0.01   0.00    -0.28  -0.35   0.02
  14   6     0.06   0.03   0.00     0.00  -0.01   0.00    -0.03   0.02   0.00
  15   1     0.17  -0.06   0.00    -0.01   0.01   0.00    -0.06   0.04   0.00
  16   8     0.09   0.22   0.00     0.00  -0.04   0.00    -0.04  -0.03   0.00
  17   6    -0.06  -0.13   0.03    -0.05   0.02   0.02     0.05   0.04  -0.02
  18   1     0.01  -0.16   0.07     0.27  -0.12  -0.15     0.07   0.03  -0.05
  19   1    -0.11  -0.18   0.05    -0.28  -0.22   0.23     0.04   0.03  -0.03
  20   1    -0.11  -0.11  -0.01    -0.15   0.41  -0.01     0.08   0.07   0.00
  21   6     0.02   0.05   0.00     0.04   0.00   0.01    -0.02  -0.07   0.02
  22   1    -0.01   0.37  -0.10     0.04   0.01   0.02    -0.05   0.24  -0.15
  23   1     0.33  -0.02   0.11     0.05  -0.01   0.01     0.27  -0.14   0.27
  24   1    -0.19  -0.13   0.00     0.05  -0.01   0.00    -0.28  -0.35  -0.02
                    10                     11                     12
                     A                      A                      A
 Frequencies --   276.0877               334.4454               359.1685
 Red. masses --     2.3750                 2.3628                 2.7183
 Frc consts  --     0.1067                 0.1557                 0.2066
 IR Inten    --     6.4368                 0.3447                 2.5680
 Atom AN      X      Y      Z        X      Y      Z        X      Y      Z
   1   7     0.00   0.00  -0.02     0.04  -0.08   0.00     0.00   0.00   0.01
   2   6     0.00   0.00  -0.09     0.02  -0.05   0.00     0.00   0.00   0.10
   3   1     0.00   0.00  -0.08    -0.02  -0.08   0.00     0.00   0.00   0.12
   4   6     0.07   0.09  -0.03     0.02   0.05   0.02    -0.06  -0.08   0.07
   5   1     0.06   0.10   0.10     0.04   0.04   0.14    -0.03  -0.09  -0.04
   6   1     0.13   0.19  -0.09     0.03   0.17   0.00    -0.13  -0.13   0.13
   7   1     0.07   0.10  -0.05     0.01   0.05  -0.06    -0.10  -0.12   0.08
   8   6     0.00   0.00   0.03     0.01  -0.05   0.00     0.00   0.00  -0.14
   9   1     0.00   0.00   0.01    -0.01  -0.04   0.00     0.00   0.00  -0.17
  10   6     0.05   0.01   0.01    -0.13   0.07   0.12    -0.15   0.03  -0.09
  11   1     0.12   0.00   0.01    -0.07   0.07   0.20    -0.21   0.04  -0.10
  12   1     0.05   0.08  -0.01    -0.14   0.16   0.34    -0.14  -0.02   0.10
  13   1     0.05  -0.02   0.03    -0.36   0.14  -0.02    -0.28   0.06  -0.16
  14   6     0.00   0.00   0.24     0.09  -0.08   0.00     0.00   0.00   0.15
  15   1     0.00   0.00   0.79     0.11  -0.09   0.00     0.00   0.00   0.48
  16   8     0.00   0.00  -0.13     0.10  -0.06   0.00     0.00   0.00  -0.10
  17   6    -0.07  -0.09  -0.03     0.02   0.05  -0.02     0.06   0.08   0.07
  18   1    -0.06  -0.10   0.10     0.04   0.04  -0.14     0.03   0.09  -0.04
  19   1    -0.07  -0.10  -0.05     0.01   0.05   0.06     0.10   0.12   0.08
  20   1    -0.13  -0.19  -0.09     0.03   0.17   0.00     0.13   0.13   0.13
  21   6    -0.05  -0.01   0.01    -0.13   0.07  -0.12     0.15  -0.03  -0.09
  22   1    -0.05  -0.08  -0.01    -0.14   0.16  -0.34     0.14   0.02   0.10
  23   1    -0.12   0.00   0.01    -0.07   0.07  -0.20     0.21  -0.04  -0.10
  24   1    -0.05   0.02   0.03    -0.36   0.14   0.02     0.28  -0.06  -0.16
                    13                     14                     15
                     A                      A                      A
 Frequencies --   372.3470               471.4530               515.5637
 Red. masses --     2.3210                 2.5810                 3.1251
 Frc consts  --     0.1896                 0.3380                 0.4894
 IR Inten    --     2.8246                 1.1468                 3.2776
 Atom AN      X      Y      Z        X      Y      Z        X      Y      Z
   1   7    -0.08  -0.10   0.00    -0.02  -0.08   0.00     0.03  -0.03   0.00
   2   6    -0.09  -0.09   0.00     0.19  -0.16   0.00    -0.05  -0.02   0.00
   3   1    -0.10  -0.11   0.00     0.20  -0.15   0.00    -0.08  -0.05   0.00
   4   6     0.07   0.05   0.13     0.03   0.06  -0.12    -0.02  -0.02   0.05
   5   1     0.09   0.04   0.41    -0.13   0.14  -0.02     0.01  -0.03   0.08
   6   1     0.25   0.23  -0.02    -0.15   0.17   0.00     0.03   0.00   0.01
   7   1     0.07   0.05   0.17     0.13   0.20  -0.46    -0.03  -0.03   0.09
   8   6    -0.08  -0.05   0.00    -0.04   0.05   0.00    -0.04   0.21   0.00
   9   1    -0.15  -0.04   0.00    -0.08   0.06   0.00    -0.13   0.23   0.00
  10   6     0.05   0.02  -0.03    -0.03   0.00  -0.05    -0.09   0.04  -0.17
  11   1     0.09   0.01   0.06    -0.06   0.00  -0.12    -0.23   0.05  -0.45
  12   1     0.04   0.05  -0.18    -0.02  -0.05  -0.09    -0.07  -0.14  -0.17
  13   1     0.16   0.06   0.00     0.03  -0.06   0.00    -0.01  -0.15  -0.03
  14   6    -0.04  -0.06   0.00    -0.06  -0.08   0.00     0.13  -0.04   0.00
  15   1     0.04  -0.12   0.00     0.01  -0.13   0.00     0.14  -0.05   0.00
  16   8    -0.02   0.10   0.00    -0.04   0.10   0.00     0.15  -0.09   0.00
  17   6     0.07   0.05  -0.13     0.03   0.06   0.12    -0.02  -0.02  -0.05
  18   1     0.09   0.04  -0.41    -0.13   0.14   0.02     0.01  -0.03  -0.08
  19   1     0.07   0.05  -0.17     0.13   0.20   0.46    -0.03  -0.03  -0.09
  20   1     0.25   0.23   0.02    -0.15   0.17   0.00     0.03   0.00  -0.01
  21   6     0.05   0.02   0.03    -0.03   0.00   0.05    -0.09   0.04   0.17
  22   1     0.04   0.05   0.18    -0.02  -0.05   0.09    -0.07  -0.14   0.17
  23   1     0.09   0.01  -0.06    -0.06   0.00   0.12    -0.23   0.05   0.45
  24   1     0.16   0.06   0.00     0.03  -0.06   0.00    -0.01  -0.15   0.03
                    16                     17                     18
                     A                      A                      A
 Frequencies --   536.6397               620.5923               778.8729
 Red. masses --     3.9612                 2.8168                 2.7390
 Frc consts  --     0.6721                 0.6392                 0.9790
 IR Inten    --    16.6010                 7.4985                15.3559
 Atom AN      X      Y      Z        X      Y      Z        X      Y      Z
   1   7     0.00   0.00   0.42     0.07  -0.01   0.00    -0.01   0.14   0.00
   2   6     0.00   0.00  -0.07    -0.03  -0.10   0.00     0.05  -0.20   0.00
   3   1     0.00   0.00  -0.14    -0.08  -0.15   0.00     0.21  -0.03   0.00
   4   6     0.07   0.06  -0.08    -0.05  -0.03   0.08    -0.04  -0.06   0.08
   5   1     0.01   0.09   0.14    -0.08  -0.01   0.19    -0.28   0.05   0.35
   6   1     0.17   0.20  -0.16     0.00   0.04   0.04    -0.11   0.12   0.12
   7   1     0.13   0.13  -0.12    -0.02   0.01   0.06     0.13   0.15  -0.21
   8   6     0.00   0.00  -0.06     0.25   0.16   0.00    -0.04  -0.01   0.00
   9   1     0.00   0.00  -0.12     0.18   0.17   0.00     0.12  -0.05   0.00
  10   6    -0.08   0.03  -0.06     0.04  -0.01   0.06     0.00  -0.01   0.01
  11   1    -0.15   0.04  -0.09    -0.21   0.02  -0.19     0.07  -0.02   0.08
  12   1    -0.08  -0.02   0.14     0.06  -0.24   0.38    -0.01   0.05  -0.06
  13   1    -0.24   0.04  -0.14    -0.14  -0.11   0.03     0.04   0.01   0.02
  14   6     0.00   0.00  -0.01    -0.08  -0.04   0.00     0.05   0.23   0.00
  15   1     0.00   0.00  -0.34    -0.09  -0.03   0.00    -0.04   0.30   0.00
  16   8     0.00   0.00   0.01    -0.09   0.10   0.00     0.03  -0.08   0.00
  17   6    -0.07  -0.06  -0.08    -0.05  -0.03  -0.08    -0.04  -0.06  -0.08
  18   1    -0.01  -0.09   0.14    -0.08  -0.01  -0.19    -0.28   0.05  -0.35
  19   1    -0.13  -0.13  -0.12    -0.02   0.01  -0.06     0.13   0.15   0.21
  20   1    -0.17  -0.20  -0.16     0.00   0.04  -0.04    -0.11   0.12  -0.12
  21   6     0.08  -0.03  -0.06     0.04  -0.01  -0.06     0.00  -0.01  -0.01
  22   1     0.08   0.02   0.14     0.06  -0.24  -0.38    -0.01   0.05   0.06
  23   1     0.15  -0.04  -0.09    -0.21   0.02   0.19     0.07  -0.02  -0.08
  24   1     0.24  -0.04  -0.14    -0.14  -0.11  -0.03     0.04   0.01  -0.02
                    19                     20                     21
                     A                      A                      A
 Frequencies --   877.2985               906.4062               933.4154
 Red. masses --     2.6607                 2.4296                 1.2898
 Frc consts  --     1.2065                 1.1761                 0.6621
 IR Inten    --     3.1569                 0.2122                 0.3712
 Atom AN      X      Y      Z        X      Y      Z        X      Y      Z
   1   7    -0.10   0.00   0.00     0.00  -0.02   0.00     0.00   0.00   0.00
   2   6    -0.12  -0.05   0.00     0.16   0.10   0.00     0.00   0.00  -0.01
   3   1    -0.07   0.00   0.00     0.18   0.11   0.00     0.00   0.00   0.10
   4   6     0.03   0.00  -0.11    -0.03   0.01   0.14    -0.01   0.01  -0.01
   5   1     0.03   0.00   0.04    -0.03   0.01  -0.11     0.05  -0.02  -0.01
   6   1     0.21   0.06  -0.25    -0.30  -0.08   0.35     0.06  -0.02  -0.05
   7   1     0.07   0.04  -0.02    -0.09  -0.05  -0.02    -0.04  -0.03   0.10
   8   6    -0.10   0.13   0.00    -0.11   0.08   0.00     0.00   0.00  -0.08
   9   1    -0.22   0.16   0.00    -0.18   0.09   0.00     0.00   0.00   0.23
  10   6     0.05  -0.02   0.16     0.00  -0.02   0.11     0.05  -0.08   0.00
  11   1    -0.02  -0.02  -0.11     0.05  -0.04  -0.03     0.06  -0.06   0.42
  12   1     0.07  -0.16   0.09     0.01  -0.04  -0.07     0.03   0.07   0.24
  13   1     0.17  -0.26   0.35     0.17  -0.17   0.27    -0.17   0.27  -0.29
  14   6     0.04   0.05   0.00     0.00  -0.09   0.00     0.00   0.00   0.00
  15   1     0.05   0.04   0.00     0.04  -0.13   0.00     0.00   0.00   0.00
  16   8     0.05  -0.04   0.00     0.02   0.01   0.00     0.00   0.00   0.00
  17   6     0.03   0.00   0.11    -0.03   0.01  -0.14     0.01  -0.01  -0.01
  18   1     0.03   0.00  -0.04    -0.03   0.01   0.11    -0.05   0.02  -0.01
  19   1     0.07   0.04   0.02    -0.09  -0.05   0.02     0.04   0.03   0.10
  20   1     0.21   0.06   0.25    -0.30  -0.08  -0.35    -0.06   0.02  -0.05
  21   6     0.05  -0.02  -0.16     0.00  -0.02  -0.11    -0.05   0.08   0.00
  22   1     0.07  -0.16  -0.09     0.01  -0.04   0.07    -0.03  -0.07   0.24
  23   1    -0.02  -0.02   0.11     0.05  -0.04   0.03    -0.06   0.06   0.42
  24   1     0.17  -0.26  -0.35     0.17  -0.17  -0.27     0.17  -0.27  -0.29
                    22                     23                     24
                     A                      A                      A
 Frequencies --   937.0324               948.7905               952.8493
 Red. masses --     1.2036                 1.3412                 1.5135
 Frc consts  --     0.6227                 0.7113                 0.8096
 IR Inten    --     0.8733                 0.1750                 0.1783
 Atom AN      X      Y      Z        X      Y      Z        X      Y      Z
   1   7     0.00   0.00   0.01     0.00   0.00   0.02     0.00   0.00  -0.02
   2   6     0.00   0.00  -0.05     0.00   0.00   0.00     0.00   0.00  -0.11
   3   1     0.00   0.00   0.33     0.00   0.00  -0.05     0.00   0.00  -0.35
   4   6    -0.08   0.02  -0.01     0.01  -0.01   0.00    -0.08  -0.09   0.05
   5   1     0.11  -0.07   0.12    -0.03   0.01   0.01    -0.30   0.02   0.49
   6   1     0.32  -0.04  -0.28    -0.04   0.02   0.03     0.06   0.18  -0.07
   7   1    -0.12  -0.06   0.43     0.03   0.02  -0.06     0.13   0.15  -0.07
   8   6     0.00   0.00   0.02     0.00   0.00   0.08     0.00   0.00  -0.01
   9   1     0.00   0.00   0.00     0.00   0.00   0.42     0.00   0.00   0.00
  10   6    -0.02   0.02  -0.01    -0.10  -0.01  -0.05     0.01  -0.01   0.00
  11   1     0.01   0.00  -0.06     0.21  -0.05   0.21     0.00   0.00   0.03
  12   1    -0.02   0.01  -0.10    -0.12   0.29  -0.40     0.01   0.00   0.04
  13   1     0.05  -0.04   0.06     0.12   0.14  -0.04    -0.02   0.02  -0.02
  14   6     0.00   0.00  -0.01     0.00   0.00   0.00     0.00   0.00  -0.01
  15   1     0.00   0.00   0.02     0.00   0.00   0.00     0.00   0.00   0.04
  16   8     0.00   0.00   0.00     0.00   0.00   0.00     0.00   0.00   0.00
  17   6     0.08  -0.02  -0.01    -0.01   0.01   0.00     0.08   0.09   0.05
  18   1    -0.11   0.07   0.12     0.03  -0.01   0.01     0.30  -0.02   0.49
  19   1     0.12   0.06   0.43    -0.03  -0.02  -0.06    -0.13  -0.15  -0.07
  20   1    -0.32   0.04  -0.28     0.04  -0.02   0.03    -0.06  -0.18  -0.07
  21   6     0.02  -0.02  -0.01     0.10   0.01  -0.05    -0.01   0.01   0.00
  22   1     0.02  -0.01  -0.10     0.12  -0.29  -0.40    -0.01   0.00   0.04
  23   1    -0.01   0.00  -0.06    -0.21   0.05   0.21     0.00   0.00   0.03
  24   1    -0.05   0.04   0.06    -0.12  -0.14  -0.04     0.02  -0.02  -0.02
                    25                     26                     27
                     A                      A                      A
 Frequencies --  1020.2794              1059.3707              1124.6484
 Red. masses --     1.6290                 1.8853                 1.8277
 Frc consts  --     0.9991                 1.2466                 1.3621
 IR Inten    --     0.1291                13.5408                60.4507
 Atom AN      X      Y      Z        X      Y      Z        X      Y      Z
   1   7     0.00   0.00  -0.05     0.18   0.05   0.00    -0.07   0.04   0.00
   2   6     0.00   0.00   0.00    -0.01  -0.08   0.00    -0.02   0.14   0.00
   3   1     0.00   0.00   0.01    -0.17  -0.24   0.00     0.23   0.40   0.00
   4   6     0.00   0.00   0.00    -0.03   0.01  -0.02    -0.01  -0.08  -0.02
   5   1    -0.01   0.00   0.03     0.08  -0.04   0.02    -0.22   0.02   0.28
   6   1     0.02   0.01  -0.02     0.12  -0.04  -0.12     0.06   0.18  -0.09
   7   1     0.01   0.01   0.00    -0.06  -0.04   0.15     0.18   0.14  -0.12
   8   6     0.00   0.00   0.00     0.00   0.06   0.00     0.09   0.05   0.00
   9   1     0.00   0.00   0.00     0.26   0.00   0.00     0.22   0.02   0.00
  10   6     0.00   0.00   0.00    -0.08  -0.02   0.04    -0.04  -0.02   0.00
  11   1     0.01   0.00   0.00     0.21  -0.08   0.09     0.12  -0.05   0.09
  12   1     0.00   0.00  -0.01    -0.10   0.19  -0.36    -0.04   0.11  -0.13
  13   1     0.01   0.00   0.01     0.22  -0.02   0.18     0.09   0.05   0.01
  14   6     0.00   0.00   0.22    -0.01  -0.05   0.00     0.00  -0.13   0.00
  15   1     0.00   0.00  -0.97    -0.08   0.01   0.00     0.08  -0.19   0.00
  16   8     0.00   0.00  -0.06    -0.03   0.03   0.00     0.03   0.01   0.00
  17   6     0.00   0.00   0.00    -0.03   0.01   0.02    -0.01  -0.08   0.02
  18   1     0.01   0.00   0.03     0.08  -0.04  -0.02    -0.22   0.02  -0.28
  19   1    -0.01  -0.01   0.00    -0.06  -0.04  -0.15     0.18   0.14   0.12
  20   1    -0.02  -0.01  -0.02     0.12  -0.04   0.12     0.06   0.18   0.09
  21   6     0.00   0.00   0.00    -0.08  -0.02  -0.04    -0.04  -0.02   0.00
  22   1     0.00   0.00  -0.01    -0.10   0.19   0.36    -0.04   0.11   0.13
  23   1    -0.01   0.00   0.00     0.21  -0.08  -0.09     0.12  -0.05  -0.09
  24   1    -0.01   0.00   0.01     0.22  -0.02  -0.18     0.09   0.05  -0.01
                    28                     29                     30
                     A                      A                      A
 Frequencies --  1139.4336              1153.3797              1175.5982
 Red. masses --     2.1690                 2.2568                 2.1161
 Frc consts  --     1.6591                 1.7688                 1.7231
 IR Inten    --     1.7338                18.1526                20.5880
 Atom AN      X      Y      Z        X      Y      Z        X      Y      Z
   1   7     0.00   0.00  -0.02     0.00   0.00  -0.06    -0.14   0.03   0.00
   2   6     0.00   0.00  -0.13     0.00   0.00   0.23    -0.08  -0.10   0.00
   3   1     0.00   0.00  -0.24     0.00   0.00   0.43    -0.05  -0.07   0.00
   4   6    -0.02   0.04   0.05     0.03  -0.07  -0.10     0.06   0.06   0.03
   5   1     0.05   0.00  -0.11    -0.08  -0.01   0.20     0.12   0.02  -0.29
   6   1    -0.10  -0.08   0.12     0.18   0.14  -0.22    -0.14  -0.12   0.17
   7   1    -0.13  -0.08   0.10     0.22   0.14  -0.15    -0.08  -0.09  -0.10
   8   6     0.00   0.00   0.22     0.00   0.00   0.13     0.06   0.16   0.00
   9   1     0.00   0.00   0.46     0.00   0.00   0.26     0.28   0.10   0.00
  10   6     0.04   0.06  -0.10     0.03   0.03  -0.06    -0.01  -0.08  -0.02
  11   1    -0.24   0.12  -0.16    -0.13   0.06  -0.08     0.13  -0.08   0.31
  12   1     0.04  -0.05   0.19     0.03  -0.05   0.13    -0.03   0.18   0.02
  13   1    -0.21   0.07  -0.22    -0.12   0.04  -0.12     0.02   0.18  -0.14
  14   6     0.00   0.00   0.00     0.00   0.00  -0.01     0.02  -0.02   0.00
  15   1     0.00   0.00  -0.05     0.00   0.00   0.06     0.10  -0.08   0.00
  16   8     0.00   0.00   0.00     0.00   0.00   0.00     0.03  -0.02   0.00
  17   6     0.02  -0.04   0.05    -0.03   0.07  -0.10     0.06   0.06  -0.03
  18   1    -0.05   0.00  -0.11     0.08   0.01   0.20     0.12   0.02   0.29
  19   1     0.13   0.08   0.10    -0.22  -0.14  -0.15    -0.08  -0.09   0.10
  20   1     0.10   0.08   0.12    -0.18  -0.14  -0.22    -0.14  -0.12  -0.17
  21   6    -0.04  -0.06  -0.10    -0.03  -0.03  -0.06    -0.01  -0.08   0.02
  22   1    -0.04   0.05   0.19    -0.03   0.05   0.13    -0.03   0.18  -0.02
  23   1     0.24  -0.12  -0.16     0.13  -0.06  -0.08     0.13  -0.08  -0.31
  24   1     0.21  -0.07  -0.22     0.12  -0.04  -0.12     0.02   0.18   0.14
                    31                     32                     33
                     A                      A                      A
 Frequencies --  1193.0196              1229.7740              1317.8829
 Red. masses --     1.9068                 2.5940                 2.7344
 Frc consts  --     1.5990                 2.3114                 2.7981
 IR Inten    --    12.0159                44.1629               110.8641
 Atom AN      X      Y      Z        X      Y      Z        X      Y      Z
   1   7     0.03   0.02   0.00     0.20   0.04   0.00     0.00   0.24   0.00
   2   6     0.13   0.00   0.00    -0.18   0.06   0.00    -0.05  -0.12   0.00
   3   1     0.15   0.02   0.00    -0.26  -0.02   0.00     0.29   0.25   0.00
   4   6    -0.08   0.00  -0.02     0.08  -0.06   0.01    -0.01   0.03   0.00
   5   1     0.05  -0.05   0.18    -0.19   0.07  -0.03     0.08  -0.01  -0.05
   6   1     0.19   0.00  -0.20    -0.16   0.12   0.15     0.02  -0.11   0.00
   7   1    -0.05   0.01   0.28     0.14   0.04  -0.34    -0.06  -0.03   0.01
   8   6    -0.12   0.11   0.00    -0.15   0.06   0.00    -0.12  -0.08   0.00
   9   1    -0.18   0.13   0.00    -0.30   0.10   0.00     0.52  -0.25   0.00
  10   6     0.05  -0.08  -0.03     0.04  -0.04  -0.01     0.05   0.05  -0.01
  11   1    -0.03  -0.04   0.29    -0.07  -0.01   0.16    -0.13   0.08  -0.11
  12   1     0.04   0.05   0.23     0.03   0.03   0.15     0.07  -0.15   0.11
  13   1    -0.13   0.14  -0.22    -0.10   0.07  -0.13    -0.12  -0.13   0.02
  14   6    -0.01  -0.02   0.00    -0.01  -0.06   0.00     0.00  -0.19   0.00
  15   1    -0.01  -0.02   0.00    -0.19   0.08   0.00     0.15  -0.30   0.00
  16   8     0.02   0.00   0.00    -0.02   0.03   0.00     0.02   0.01   0.00
  17   6    -0.08   0.00   0.02     0.08  -0.06  -0.01    -0.01   0.03   0.00
  18   1     0.05  -0.05  -0.18    -0.19   0.07   0.03     0.08  -0.01   0.05
  19   1    -0.05   0.01  -0.28     0.14   0.04   0.34    -0.06  -0.03  -0.01
  20   1     0.19   0.00   0.20    -0.16   0.12  -0.15     0.02  -0.11   0.00
  21   6     0.05  -0.08   0.03     0.04  -0.04   0.01     0.05   0.05   0.01
  22   1     0.04   0.05  -0.23     0.03   0.03  -0.15     0.07  -0.15  -0.11
  23   1    -0.03  -0.04  -0.29    -0.07  -0.01  -0.16    -0.13   0.08   0.11
  24   1    -0.13   0.14   0.22    -0.10   0.07   0.13    -0.12  -0.13  -0.02
                    34                     35                     36
                     A                      A                      A
 Frequencies --  1349.9799              1358.5994              1394.9271
 Red. masses --     1.3280                 1.3390                 1.2012
 Frc consts  --     1.4259                 1.4562                 1.3771
 IR Inten    --     6.3305                 0.2235                13.8560
 Atom AN      X      Y      Z        X      Y      Z        X      Y      Z
   1   7     0.00   0.00   0.01     0.00   0.00   0.00    -0.02  -0.01   0.00
   2   6     0.00   0.00  -0.11     0.00   0.00   0.10     0.05   0.07   0.00
   3   1     0.00   0.00   0.67     0.00   0.00  -0.62    -0.45  -0.44   0.00
   4   6     0.03  -0.03   0.02    -0.03   0.02  -0.01     0.01  -0.03  -0.01
   5   1    -0.11   0.03   0.00     0.11  -0.04  -0.02    -0.07   0.01   0.08
   6   1    -0.08   0.04   0.09     0.09  -0.03  -0.09    -0.07   0.08   0.03
   7   1     0.02  -0.03  -0.09    -0.02   0.03   0.06     0.05   0.01   0.04
   8   6     0.00   0.00  -0.10     0.00   0.00  -0.11    -0.06   0.02   0.00
   9   1     0.00   0.00   0.61     0.00   0.00   0.68     0.53  -0.13   0.00
  10   6     0.00   0.04   0.02     0.01   0.04   0.03     0.02   0.01   0.00
  11   1     0.04   0.02  -0.06     0.00   0.03  -0.10    -0.08   0.03   0.00
  12   1     0.02  -0.13   0.02     0.02  -0.09  -0.01     0.02   0.03   0.03
  13   1     0.02  -0.08   0.09     0.02  -0.07   0.08    -0.03  -0.03   0.00
  14   6     0.00   0.00   0.00     0.00   0.00   0.00    -0.01   0.04   0.00
  15   1     0.00   0.00   0.00     0.00   0.00   0.01     0.38  -0.27   0.00
  16   8     0.00   0.00   0.00     0.00   0.00   0.00    -0.02  -0.02   0.00
  17   6    -0.03   0.03   0.02     0.03  -0.02  -0.01     0.01  -0.03   0.01
  18   1     0.11  -0.03   0.00    -0.11   0.04  -0.02    -0.07   0.01  -0.08
  19   1    -0.02   0.03  -0.09     0.02  -0.03   0.06     0.05   0.01  -0.04
  20   1     0.08  -0.04   0.09    -0.09   0.03  -0.09    -0.07   0.08  -0.03
  21   6     0.00  -0.04   0.02    -0.01  -0.04   0.03     0.02   0.01   0.00
  22   1    -0.02   0.13   0.02    -0.02   0.09  -0.01     0.02   0.03  -0.03
  23   1    -0.04  -0.02  -0.06     0.00  -0.03  -0.10    -0.08   0.03   0.00
  24   1    -0.02   0.08   0.09    -0.02   0.07   0.08    -0.03  -0.03   0.00
                    37                     38                     39
                     A                      A                      A
 Frequencies --  1399.8171              1408.6701              1418.7799
 Red. masses --     1.2414                 1.2361                 1.2338
 Frc consts  --     1.4332                 1.4452                 1.4633
 IR Inten    --     8.6820                16.7821                16.5319
 Atom AN      X      Y      Z        X      Y      Z        X      Y      Z
   1   7     0.00   0.00   0.00     0.00   0.00   0.00     0.00   0.02   0.00
   2   6     0.00   0.00  -0.02     0.00   0.00  -0.01    -0.01  -0.01   0.00
   3   1     0.00   0.00   0.05     0.00   0.00   0.08     0.03   0.03   0.00
   4   6    -0.05  -0.01   0.08    -0.01   0.00   0.02     0.06   0.02  -0.08
   5   1     0.17  -0.10  -0.36     0.02  -0.02  -0.06    -0.19   0.12   0.33
   6   1     0.31   0.07  -0.19     0.05   0.01  -0.03    -0.30  -0.09   0.20
   7   1     0.11   0.18  -0.35     0.02   0.03  -0.07    -0.14  -0.22   0.33
   8   6     0.00   0.00   0.01     0.00   0.00  -0.02     0.02  -0.01   0.00
   9   1     0.00   0.00  -0.04     0.00   0.00   0.03    -0.13   0.03   0.00
  10   6    -0.01   0.00  -0.02     0.04  -0.03   0.09     0.00   0.00   0.01
  11   1     0.04   0.00   0.05    -0.18   0.00  -0.34     0.00  -0.01  -0.02
  12   1     0.00  -0.03   0.08     0.01   0.15  -0.38     0.00   0.00  -0.04
  13   1     0.05  -0.02   0.03    -0.25   0.23  -0.21    -0.02   0.02  -0.02
  14   6     0.00   0.00   0.00     0.00   0.00   0.00    -0.01  -0.01   0.00
  15   1     0.00   0.00   0.00     0.00   0.00   0.00    -0.02   0.00   0.00
  16   8     0.00   0.00   0.00     0.00   0.00   0.00     0.01   0.00   0.00
  17   6     0.05   0.01   0.08     0.01   0.00   0.02     0.06   0.02   0.08
  18   1    -0.17   0.10  -0.36    -0.02   0.02  -0.06    -0.19   0.12  -0.33
  19   1    -0.11  -0.18  -0.35    -0.02  -0.03  -0.07    -0.14  -0.22  -0.33
  20   1    -0.31  -0.07  -0.19    -0.05  -0.01  -0.03    -0.30  -0.09  -0.20
  21   6     0.01   0.00  -0.02    -0.04   0.03   0.09     0.00   0.00  -0.01
  22   1     0.00   0.03   0.08    -0.01  -0.15  -0.38     0.00   0.00   0.04
  23   1    -0.04   0.00   0.05     0.18   0.00  -0.34     0.00  -0.01   0.02
  24   1    -0.05   0.02   0.03     0.25  -0.23  -0.21    -0.02   0.02   0.02
                    40                     41                     42
                     A                      A                      A
 Frequencies --  1426.9334              1455.4223              1465.0386
 Red. masses --     1.2347                 1.2058                 1.6238
 Frc consts  --     1.4812                 1.5049                 2.0535
 IR Inten    --     0.5890                59.4021                27.7525
 Atom AN      X      Y      Z        X      Y      Z        X      Y      Z
   1   7     0.01  -0.03   0.00     0.02   0.09   0.00     0.08  -0.12   0.00
   2   6    -0.01   0.00   0.00     0.00  -0.01   0.00    -0.06  -0.02   0.00
   3   1     0.04   0.05   0.00    -0.08  -0.09   0.00     0.48   0.53   0.00
   4   6     0.01   0.00  -0.01     0.00   0.00   0.00     0.01   0.02   0.00
   5   1    -0.04   0.02   0.01     0.03  -0.02   0.00    -0.08   0.05  -0.04
   6   1    -0.02   0.01   0.01     0.01  -0.02   0.00     0.04  -0.01  -0.02
   7   1    -0.02  -0.03   0.03     0.02   0.02  -0.04    -0.10  -0.10   0.00
   8   6    -0.01   0.00   0.00     0.05  -0.03   0.00    -0.04   0.04   0.00
   9   1     0.12  -0.04   0.00    -0.57   0.14   0.00     0.28  -0.04   0.00
  10   6    -0.04   0.04  -0.08    -0.02   0.00  -0.01     0.01  -0.01   0.01
  11   1     0.21   0.00   0.32     0.11  -0.03   0.02    -0.07   0.01   0.01
  12   1    -0.01  -0.20   0.36    -0.01  -0.05   0.06     0.00   0.05  -0.08
  13   1     0.23  -0.24   0.21     0.08   0.04   0.01    -0.07  -0.02  -0.02
  14   6     0.00   0.01   0.00     0.01   0.01   0.00     0.03   0.10   0.00
  15   1    -0.04   0.04   0.00     0.61  -0.43   0.00     0.46  -0.23   0.00
  16   8     0.00   0.00   0.00    -0.05  -0.02   0.00    -0.09  -0.01   0.00
  17   6     0.01   0.00   0.01     0.00   0.00   0.00     0.01   0.02   0.00
  18   1    -0.04   0.02  -0.01     0.03  -0.02   0.00    -0.08   0.05   0.04
  19   1    -0.02  -0.03  -0.03     0.02   0.02   0.04    -0.10  -0.10   0.00
  20   1    -0.02   0.01  -0.01     0.01  -0.02   0.00     0.04  -0.01   0.02
  21   6    -0.04   0.04   0.08    -0.02   0.00   0.01     0.01  -0.01  -0.01
  22   1    -0.01  -0.20  -0.36    -0.01  -0.05  -0.06     0.00   0.05   0.08
  23   1     0.21   0.00  -0.32     0.11  -0.03  -0.02    -0.07   0.01  -0.01
  24   1     0.23  -0.24  -0.21     0.08   0.04  -0.01    -0.07  -0.02   0.02
                    43                     44                     45
                     A                      A                      A
 Frequencies --  1483.1634              1490.1979              1496.4588
 Red. masses --     1.0407                 1.0428                 1.0491
 Frc consts  --     1.3489                 1.3645                 1.3842
 IR Inten    --     0.1411                 0.8756                 1.2425
 Atom AN      X      Y      Z        X      Y      Z        X      Y      Z
   1   7     0.00   0.00   0.00     0.00   0.00   0.00     0.00   0.00   0.00
   2   6     0.00   0.00   0.02     0.00   0.00   0.01     0.00   0.00   0.01
   3   1     0.00   0.00  -0.09     0.00   0.00  -0.03     0.00   0.00  -0.06
   4   6     0.02  -0.02   0.01     0.00  -0.01   0.00     0.01   0.00   0.00
   5   1    -0.31   0.13  -0.30    -0.05   0.02  -0.11    -0.10   0.05  -0.03
   6   1     0.06   0.41  -0.07     0.00   0.15  -0.01     0.05   0.03  -0.04
   7   1    -0.09  -0.15   0.20     0.01   0.00   0.09    -0.07  -0.08  -0.01
   8   6     0.00   0.00  -0.01     0.00   0.00   0.00     0.00   0.00   0.03
   9   1     0.00   0.00   0.03     0.00   0.00  -0.04     0.00   0.00  -0.08
  10   6     0.00  -0.01   0.00     0.03   0.02  -0.01    -0.02   0.02   0.01
  11   1    -0.05   0.00  -0.09    -0.10   0.06   0.33     0.43  -0.08  -0.07
  12   1    -0.01   0.11   0.10     0.03  -0.09  -0.29     0.03  -0.44  -0.08
  13   1     0.13   0.07   0.01    -0.34  -0.34   0.03    -0.16   0.16  -0.13
  14   6     0.00   0.00   0.00     0.00   0.00   0.00     0.00   0.00   0.00
  15   1     0.00   0.00   0.00     0.00   0.00   0.00     0.00   0.00   0.00
  16   8     0.00   0.00   0.00     0.00   0.00   0.00     0.00   0.00   0.00
  17   6    -0.02   0.02   0.01     0.00   0.01   0.00    -0.01   0.00   0.00
  18   1     0.31  -0.13  -0.30     0.05  -0.02  -0.11     0.10  -0.05  -0.03
  19   1     0.09   0.15   0.20    -0.01   0.00   0.09     0.07   0.08  -0.01
  20   1    -0.06  -0.41  -0.07     0.00  -0.15  -0.01    -0.05  -0.03  -0.04
  21   6     0.00   0.01   0.00    -0.03  -0.02  -0.01     0.02  -0.02   0.01
  22   1     0.01  -0.11   0.10    -0.03   0.09  -0.29    -0.03   0.44  -0.08
  23   1     0.05   0.00  -0.09     0.10  -0.06   0.33    -0.43   0.08  -0.07
  24   1    -0.13  -0.07   0.01     0.34   0.34   0.03     0.16  -0.16  -0.13
                    46                     47                     48
                     A                      A                      A
 Frequencies --  1499.9462              1507.2608              1507.7565
 Red. masses --     1.0638                 1.0450                 1.0476
 Frc consts  --     1.4102                 1.3987                 1.4032
 IR Inten    --     9.6930                 8.4197                 0.8623
 Atom AN      X      Y      Z        X      Y      Z        X      Y      Z
   1   7    -0.01   0.02   0.00     0.00   0.01   0.00     0.00   0.00   0.00
   2   6     0.03  -0.02   0.00     0.00  -0.01   0.00     0.00   0.00  -0.02
   3   1     0.01  -0.04   0.00     0.04   0.04   0.00     0.00   0.00   0.02
   4   6     0.02  -0.02   0.02     0.00   0.00   0.00    -0.02  -0.03  -0.02
   5   1    -0.34   0.14  -0.31     0.01   0.00   0.01     0.25  -0.13  -0.11
   6   1     0.13   0.36  -0.11    -0.01  -0.02   0.00    -0.25   0.24   0.13
   7   1    -0.15  -0.20   0.14    -0.01   0.00   0.01     0.29   0.29   0.29
   8   6     0.00  -0.01   0.00     0.00  -0.03   0.00     0.00   0.00   0.00
   9   1    -0.04   0.00   0.00    -0.02  -0.03   0.00     0.00   0.00  -0.01
  10   6    -0.01   0.00   0.00     0.00  -0.03  -0.02    -0.01   0.00   0.00
  11   1     0.05  -0.02  -0.09    -0.31   0.04  -0.13     0.10  -0.02  -0.06
  12   1     0.00  -0.03   0.04    -0.05   0.42   0.26     0.00  -0.07   0.02
  13   1     0.05   0.09  -0.02     0.35   0.05   0.11     0.02   0.07  -0.03
  14   6    -0.02  -0.01   0.00     0.00   0.00   0.00     0.00   0.00   0.00
  15   1    -0.02   0.00   0.00    -0.01   0.01   0.00     0.00   0.00   0.00
  16   8     0.02   0.00   0.00     0.00   0.00   0.00     0.00   0.00   0.00
  17   6     0.02  -0.02  -0.02     0.00   0.00   0.00     0.02   0.03  -0.02
  18   1    -0.34   0.14   0.31     0.01   0.00  -0.01    -0.25   0.13  -0.11
  19   1    -0.15  -0.20  -0.14    -0.01   0.00  -0.01    -0.29  -0.29   0.29
  20   1     0.13   0.36   0.11    -0.01  -0.02   0.00     0.25  -0.24   0.13
  21   6    -0.01   0.00   0.00     0.00  -0.03   0.02     0.01   0.00   0.00
  22   1     0.00  -0.03  -0.04    -0.05   0.42  -0.26     0.00   0.07   0.02
  23   1     0.05  -0.02   0.09    -0.31   0.04   0.13    -0.10   0.02  -0.06
  24   1     0.05   0.09   0.02     0.35   0.05  -0.11    -0.02  -0.07  -0.03
                    49                     50                     51
                     A                      A                      A
 Frequencies --  1513.3300              1525.1290              1744.0928
 Red. masses --     1.0651                 1.0613                 8.0420
 Frc consts  --     1.4371                 1.4545                14.4129
 IR Inten    --     3.8836                 6.1605               410.9927
 Atom AN      X      Y      Z        X      Y      Z        X      Y      Z
   1   7    -0.01   0.02   0.00     0.01  -0.01   0.00    -0.10   0.04   0.00
   2   6     0.00  -0.02   0.00    -0.03  -0.03   0.00     0.05   0.02   0.00
   3   1     0.00  -0.02   0.00     0.10   0.10   0.00    -0.15  -0.19   0.00
   4   6     0.00  -0.01   0.00    -0.01  -0.02  -0.02     0.00   0.00   0.00
   5   1    -0.01   0.00  -0.11     0.19  -0.10  -0.15    -0.10   0.04   0.04
   6   1    -0.03   0.15   0.01    -0.25   0.28   0.12     0.02   0.02  -0.01
   7   1     0.04   0.03   0.11     0.25   0.24   0.33    -0.06  -0.08   0.05
   8   6     0.05  -0.01   0.00    -0.01   0.00   0.00    -0.03   0.02   0.00
   9   1    -0.16   0.05   0.00     0.04  -0.01   0.00     0.01  -0.02   0.00
  10   6     0.02   0.01  -0.02    -0.01   0.00   0.00     0.01   0.00   0.00
  11   1    -0.28   0.09   0.32     0.07  -0.02  -0.09     0.01   0.00  -0.01
  12   1     0.00   0.17  -0.20     0.00  -0.04   0.05     0.01  -0.03   0.03
  13   1    -0.17  -0.36   0.11     0.04   0.10  -0.03    -0.02   0.01  -0.02
  14   6     0.00   0.00   0.00     0.01   0.00   0.00     0.63  -0.15   0.00
  15   1     0.02  -0.01   0.00     0.01   0.00   0.00    -0.25   0.48   0.00
  16   8     0.00   0.00   0.00    -0.01   0.00   0.00    -0.38   0.05   0.00
  17   6     0.00  -0.01   0.00    -0.01  -0.02   0.02     0.00   0.00   0.00
  18   1    -0.01   0.00   0.11     0.19  -0.10   0.15    -0.10   0.04  -0.04
  19   1     0.04   0.03  -0.11     0.25   0.24  -0.33    -0.06  -0.08  -0.05
  20   1    -0.03   0.15  -0.01    -0.25   0.28  -0.12     0.02   0.02   0.01
  21   6     0.02   0.01   0.02    -0.01   0.00   0.00     0.01   0.00   0.00
  22   1     0.00   0.17   0.20     0.00  -0.04  -0.05     0.01  -0.03  -0.03
  23   1    -0.28   0.09  -0.32     0.07  -0.02   0.09     0.01   0.00   0.01
  24   1    -0.17  -0.36  -0.11     0.04   0.10   0.03    -0.02   0.01   0.02
                    52                     53                     54
                     A                      A                      A
 Frequencies --  2924.9870              3034.5678              3038.2506
 Red. masses --     1.0828                 1.0347                 1.0373
 Frc consts  --     5.4582                 5.6139                 5.6417
 IR Inten    --    94.9394                11.9385                31.0651
 Atom AN      X      Y      Z        X      Y      Z        X      Y      Z
   1   7     0.00   0.00   0.00     0.00   0.00   0.00     0.00   0.00   0.00
   2   6     0.00   0.00   0.00     0.00   0.00   0.00     0.00   0.00   0.00
   3   1    -0.01   0.01   0.00     0.00   0.00   0.00     0.00   0.00   0.00
   4   6     0.00   0.00   0.00     0.00   0.00   0.00    -0.01  -0.02   0.03
   5   1     0.00   0.00   0.00    -0.02  -0.04   0.00     0.20   0.46   0.01
   6   1     0.00   0.00   0.00     0.03   0.01   0.04    -0.24  -0.04  -0.32
   7   1     0.00   0.00   0.00    -0.02   0.02   0.00     0.20  -0.19  -0.01
   8   6     0.00   0.01   0.00     0.00   0.00   0.00     0.00   0.00   0.00
   9   1    -0.01  -0.07   0.00     0.00   0.00   0.00     0.00   0.00   0.00
  10   6     0.00   0.00   0.00     0.02  -0.02   0.03     0.00   0.00   0.00
  11   1     0.00   0.00   0.00     0.09   0.41  -0.02     0.01   0.04   0.00
  12   1     0.00   0.00   0.00    -0.42  -0.05   0.01    -0.05  -0.01   0.00
  13   1     0.00   0.00   0.00     0.14  -0.17  -0.29     0.01  -0.02  -0.03
  14   6    -0.05  -0.07   0.00     0.00   0.00   0.00     0.00   0.00   0.00
  15   1     0.60   0.79   0.00     0.00   0.00   0.00     0.00   0.00   0.00
  16   8     0.00   0.00   0.00     0.00   0.00   0.00     0.00   0.00   0.00
  17   6     0.00   0.00   0.00     0.00   0.00   0.00     0.01   0.02   0.03
  18   1     0.00   0.00   0.00     0.02   0.04   0.00    -0.20  -0.46   0.01
  19   1     0.00   0.00   0.00     0.02  -0.02   0.00    -0.20   0.19  -0.01
  20   1     0.00   0.00   0.00    -0.03  -0.01   0.04     0.24   0.04  -0.32
  21   6     0.00   0.00   0.00    -0.02   0.02   0.03     0.00   0.00   0.00
  22   1     0.00   0.00   0.00     0.42   0.05   0.01     0.05   0.01   0.00
  23   1     0.00   0.00   0.00    -0.09  -0.41  -0.02    -0.01  -0.04   0.00
  24   1     0.00   0.00   0.00    -0.14   0.17  -0.29    -0.01   0.02  -0.03
                    55                     56                     57
                     A                      A                      A
 Frequencies --  3038.5293              3042.8142              3045.7781
 Red. masses --     1.0405                 1.0390                 1.0800
 Frc consts  --     5.6598                 5.6679                 5.9027
 IR Inten    --     8.8993                23.5873                11.4304
 Atom AN      X      Y      Z        X      Y      Z        X      Y      Z
   1   7     0.00   0.00   0.00     0.00   0.00   0.00     0.00   0.00   0.00
   2   6    -0.01   0.01   0.00    -0.01   0.01   0.00     0.00   0.00   0.00
   3   1     0.07  -0.07   0.00     0.10  -0.10   0.00    -0.01   0.01   0.00
   4   6     0.00   0.00   0.00    -0.01  -0.02   0.03     0.00   0.00   0.00
   5   1    -0.01  -0.02   0.00     0.19   0.44   0.01    -0.01  -0.03   0.00
   6   1     0.01   0.00   0.02    -0.25  -0.04  -0.34     0.02   0.00   0.02
   7   1    -0.02   0.01   0.00     0.20  -0.18  -0.01    -0.01   0.01   0.00
   8   6     0.01   0.02   0.00     0.00   0.00   0.00    -0.02  -0.07   0.00
   9   1    -0.07  -0.27   0.00     0.01   0.05   0.00     0.23   0.88   0.00
  10   6     0.01  -0.02   0.02     0.00   0.00   0.00     0.01   0.01   0.01
  11   1     0.10   0.44  -0.02     0.01   0.02   0.00     0.00   0.00   0.00
  12   1    -0.36  -0.04   0.00    -0.02   0.00   0.00    -0.21  -0.02   0.01
  13   1     0.13  -0.16  -0.27     0.01  -0.01  -0.01     0.07  -0.08  -0.15
  14   6     0.00   0.00   0.00     0.00   0.00   0.00     0.00  -0.01   0.00
  15   1    -0.01  -0.01   0.00     0.00   0.00   0.00     0.04   0.05   0.00
  16   8     0.00   0.00   0.00     0.00   0.00   0.00     0.00   0.00   0.00
  17   6     0.00   0.00   0.00    -0.01  -0.02  -0.03     0.00   0.00   0.00
  18   1    -0.01  -0.02   0.00     0.19   0.44  -0.01    -0.01  -0.03   0.00
  19   1    -0.02   0.01   0.00     0.20  -0.18   0.01    -0.01   0.01   0.00
  20   1     0.01   0.00  -0.02    -0.25  -0.04   0.34     0.02   0.00  -0.02
  21   6     0.01  -0.02  -0.02     0.00   0.00   0.00     0.01   0.01  -0.01
  22   1    -0.36  -0.04   0.00    -0.02   0.00   0.00    -0.21  -0.02  -0.01
  23   1     0.10   0.44   0.02     0.01   0.02   0.00     0.00   0.00   0.00
  24   1     0.13  -0.16   0.27     0.01  -0.01   0.01     0.07  -0.08   0.15
                    58                     59                     60
                     A                      A                      A
 Frequencies --  3063.1934              3095.3735              3097.7559
 Red. masses --     1.0824                 1.1019                 1.1012
 Frc consts  --     5.9840                 6.2203                 6.2262
 IR Inten    --    20.0838                 1.7346                13.7611
 Atom AN      X      Y      Z        X      Y      Z        X      Y      Z
   1   7     0.00   0.00   0.00     0.00   0.00   0.00     0.00   0.00   0.00
   2   6    -0.06   0.06   0.00     0.00   0.00   0.00     0.00   0.00   0.00
   3   1     0.69  -0.67   0.00     0.00   0.00   0.00     0.00   0.00   0.00
   4   6     0.01  -0.01   0.00    -0.01  -0.01  -0.01    -0.03  -0.04  -0.03
   5   1    -0.01  -0.03   0.00     0.06   0.14   0.00     0.17   0.40   0.00
   6   1     0.02   0.00   0.03     0.10   0.01   0.13     0.29   0.04   0.40
   7   1    -0.12   0.11   0.00    -0.02   0.01   0.00    -0.07   0.04   0.00
   8   6     0.00   0.00   0.00     0.00   0.00   0.00     0.00   0.00   0.00
   9   1     0.02   0.06   0.00     0.00   0.00   0.00     0.00   0.00   0.00
  10   6     0.00   0.00   0.00    -0.05  -0.04   0.00     0.01   0.02   0.00
  11   1     0.00   0.00   0.00     0.09   0.45  -0.02    -0.04  -0.18   0.01
  12   1     0.06   0.00   0.00     0.48   0.04   0.00    -0.14  -0.01   0.00
  13   1    -0.02   0.03   0.05     0.00  -0.02  -0.02     0.02  -0.01  -0.03
  14   6     0.00   0.00   0.00     0.00   0.00   0.00     0.00   0.00   0.00
  15   1     0.01   0.01   0.00     0.00   0.00   0.00     0.00   0.00   0.00
  16   8     0.00   0.00   0.00     0.00   0.00   0.00     0.00   0.00   0.00
  17   6     0.01  -0.01   0.00     0.01   0.01  -0.01     0.03   0.04  -0.03
  18   1    -0.01  -0.03   0.00    -0.06  -0.14   0.00    -0.17  -0.40   0.00
  19   1    -0.12   0.11   0.00     0.02  -0.01   0.00     0.07  -0.04   0.00
  20   1     0.02   0.00  -0.03    -0.10  -0.01   0.13    -0.29  -0.04   0.40
  21   6     0.00   0.00   0.00     0.05   0.04   0.00    -0.01  -0.02   0.00
  22   1     0.06   0.00   0.00    -0.48  -0.04   0.00     0.14   0.01   0.00
  23   1     0.00   0.00   0.00    -0.09  -0.45  -0.02     0.04   0.18   0.01
  24   1    -0.02   0.03  -0.05     0.00   0.02  -0.02    -0.02   0.01  -0.03
                    61                     62                     63
                     A                      A                      A
 Frequencies --  3101.1121              3104.0630              3108.9271
 Red. masses --     1.1014                 1.1004                 1.1030
 Frc consts  --     6.2406                 6.2471                 6.2812
 IR Inten    --    59.3793                50.9282                18.1190
 Atom AN      X      Y      Z        X      Y      Z        X      Y      Z
   1   7     0.00   0.00   0.00     0.00   0.00   0.00     0.00   0.00   0.00
   2   6     0.00   0.00   0.00     0.00   0.00   0.00     0.00   0.00   0.00
   3   1    -0.02   0.02   0.00    -0.04   0.04   0.00     0.00   0.00   0.00
   4   6    -0.04  -0.04  -0.03     0.00   0.01   0.00     0.00   0.00   0.00
   5   1     0.18   0.43   0.00    -0.03  -0.07   0.00     0.01   0.03   0.00
   6   1     0.29   0.04   0.41    -0.04   0.00  -0.06     0.02   0.00   0.03
   7   1    -0.04   0.02  -0.01     0.03  -0.02   0.00    -0.01   0.01   0.00
   8   6     0.00   0.00   0.00    -0.01  -0.02   0.00     0.00   0.00   0.00
   9   1     0.01   0.02   0.00     0.05   0.21   0.00     0.00   0.00   0.00
  10   6    -0.01   0.00   0.00    -0.05  -0.04   0.01     0.03  -0.04  -0.04
  11   1     0.01   0.04   0.00     0.08   0.43  -0.02     0.07   0.25  -0.02
  12   1     0.10   0.01   0.00     0.51   0.05   0.00    -0.25  -0.04  -0.01
  13   1     0.02  -0.02  -0.04     0.01  -0.03  -0.04    -0.22   0.27   0.49
  14   6     0.00   0.00   0.00     0.00   0.00   0.00     0.00   0.00   0.00
  15   1     0.00   0.00   0.00     0.01   0.02   0.00     0.00   0.00   0.00
  16   8     0.00   0.00   0.00     0.00   0.00   0.00     0.00   0.00   0.00
  17   6    -0.04  -0.04   0.03     0.00   0.01   0.00     0.00   0.00   0.00
  18   1     0.18   0.43   0.00    -0.03  -0.07   0.00    -0.01  -0.03   0.00
  19   1    -0.04   0.02   0.01     0.03  -0.02   0.00     0.01  -0.01   0.00
  20   1     0.29   0.04  -0.41    -0.04   0.00   0.06    -0.02   0.00   0.03
  21   6    -0.01   0.00   0.00    -0.05  -0.04  -0.01    -0.03   0.04  -0.04
  22   1     0.10   0.01   0.00     0.51   0.05   0.00     0.25   0.04  -0.01
  23   1     0.01   0.04   0.00     0.08   0.43   0.02    -0.07  -0.25  -0.02
  24   1     0.02  -0.02   0.04     0.01  -0.03   0.04     0.22  -0.27   0.49
                    64                     65                     66
                     A                      A                      A
 Frequencies --  3111.4284              3133.8822              3138.2952
 Red. masses --     1.1026                 1.1009                 1.1000
 Frc consts  --     6.2888                 6.3704                 6.3833
 IR Inten    --    31.9310                 1.2135                16.6834
 Atom AN      X      Y      Z        X      Y      Z        X      Y      Z
   1   7     0.00   0.00   0.00     0.00   0.00   0.00     0.00   0.00   0.00
   2   6     0.00   0.00   0.00     0.00   0.00   0.00    -0.01   0.01   0.00
   3   1    -0.04   0.04   0.00     0.00   0.00  -0.01     0.14  -0.13   0.00
   4   6     0.00   0.00   0.00    -0.04   0.05  -0.01    -0.04   0.05  -0.01
   5   1     0.01   0.03   0.00    -0.07  -0.14   0.00    -0.08  -0.16   0.00
   6   1     0.03   0.00   0.04     0.13   0.03   0.19     0.12   0.03   0.18
   7   1     0.01  -0.01   0.00     0.47  -0.44  -0.03     0.47  -0.43  -0.03
   8   6     0.00  -0.01   0.00     0.00   0.00   0.00     0.00   0.00   0.00
   9   1     0.03   0.13   0.00     0.00   0.00   0.00     0.00  -0.01   0.00
  10   6     0.03  -0.04  -0.04     0.00   0.00   0.00     0.00   0.00   0.00
  11   1     0.07   0.29  -0.02     0.00   0.00   0.00     0.00  -0.02   0.00
  12   1    -0.22  -0.03  -0.01    -0.01   0.00   0.00    -0.01   0.00   0.00
  13   1    -0.22   0.26   0.48     0.00   0.00   0.01     0.00   0.00   0.00
  14   6     0.00   0.00   0.00     0.00   0.00   0.00     0.00   0.00   0.00
  15   1     0.00   0.01   0.00     0.00   0.00   0.00     0.00   0.01   0.00
  16   8     0.00   0.00   0.00     0.00   0.00   0.00     0.00   0.00   0.00
  17   6     0.00   0.00   0.00     0.04  -0.05  -0.01    -0.04   0.05   0.01
  18   1     0.01   0.03   0.00     0.07   0.14   0.00    -0.08  -0.16   0.00
  19   1     0.01  -0.01   0.00    -0.47   0.44  -0.03     0.47  -0.43   0.03
  20   1     0.03   0.00  -0.04    -0.13  -0.03   0.19     0.12   0.03  -0.18
  21   6     0.03  -0.04   0.04     0.00   0.00   0.00     0.00   0.00   0.00
  22   1    -0.22  -0.03   0.01     0.01   0.00   0.00    -0.01   0.00   0.00
  23   1     0.07   0.29   0.02     0.00   0.00   0.00     0.00  -0.02   0.00
  24   1    -0.22   0.26  -0.48     0.00   0.00   0.01     0.00   0.00   0.00

 -------------------
 - Thermochemistry -
 -------------------
 Temperature   298.150 Kelvin.  Pressure   1.00000 Atm.
 Atom  1 has atomic number  7 and mass  14.00307
 Atom  2 has atomic number  6 and mass  12.00000
 Atom  3 has atomic number  1 and mass   1.00783
 Atom  4 has atomic number  6 and mass  12.00000
 Atom  5 has atomic number  1 and mass   1.00783
 Atom  6 has atomic number  1 and mass   1.00783
 Atom  7 has atomic number  1 and mass   1.00783
 Atom  8 has atomic number  6 and mass  12.00000
 Atom  9 has atomic number  1 and mass   1.00783
 Atom 10 has atomic number  6 and mass  12.00000
 Atom 11 has atomic number  1 and mass   1.00783
 Atom 12 has atomic number  1 and mass   1.00783
 Atom 13 has atomic number  1 and mass   1.00783
 Atom 14 has atomic number  6 and mass  12.00000
 Atom 15 has atomic number  1 and mass   1.00783
 Atom 16 has atomic number  8 and mass  15.99491
 Atom 17 has atomic number  6 and mass  12.00000
 Atom 18 has atomic number  1 and mass   1.00783
 Atom 19 has atomic number  1 and mass   1.00783
 Atom 20 has atomic number  1 and mass   1.00783
 Atom 21 has atomic number  6 and mass  12.00000
 Atom 22 has atomic number  1 and mass   1.00783
 Atom 23 has atomic number  1 and mass   1.00783
 Atom 24 has atomic number  1 and mass   1.00783
 Molecular mass:   129.11536 amu.
 Principal axes and moments of inertia in atomic units:
                           1         2         3
     EIGENVALUES --   910.321351501.799221624.95309
           X            0.99851   0.05458   0.00000
           Y           -0.05458   0.99851   0.00000
           Z            0.00000   0.00000   1.00000
 This molecule is an asymmetric top.
 Rotational symmetry number  1.
 Warning -- assumption of classical behavior for rotation
           may cause significant error
 Rotational temperatures (Kelvin)      0.09515     0.05767     0.05330
 Rotational constants (GHZ):           1.98253     1.20172     1.11064
 Zero-point vibrational energy     564936.3 (Joules/Mol)
                                  135.02301 (Kcal/Mol)
 Warning -- explicit consideration of  17 degrees of freedom as
           vibrations may cause significant error
 Vibrational temperatures:    104.57   124.00   210.36   295.09   314.61
          (Kelvin)            326.78   335.77   354.40   367.63   397.23
                              481.19   516.76   535.72   678.31   741.78
                              772.10   892.89  1120.62  1262.24  1304.11
                             1342.97  1348.18  1365.10  1370.94  1467.95
                             1524.20  1618.12  1639.39  1659.45  1691.42
                             1716.49  1769.37  1896.14  1942.32  1954.72
                             2006.99  2014.02  2026.76  2041.31  2053.04
                             2094.03  2107.86  2133.94  2144.06  2153.07
                             2158.09  2168.61  2169.32  2177.34  2194.32
                             2509.36  4208.40  4366.06  4371.36  4371.76
                             4377.93  4382.19  4407.25  4453.55  4456.97
                             4461.80  4466.05  4473.05  4476.65  4508.95
                             4515.30
 
 Zero-point correction=                           0.215173 (Hartree/Particle)
 Thermal correction to Energy=                    0.226289
 Thermal correction to Enthalpy=                  0.227233
 Thermal correction to Gibbs Free Energy=         0.179475
 Sum of electronic and zero-point Energies=           -405.700226
 Sum of electronic and thermal Energies=              -405.689110
 Sum of electronic and thermal Enthalpies=            -405.688166
 Sum of electronic and thermal Free Energies=         -405.735924
 
                     E (Thermal)             CV                S
                      KCal/Mol        Cal/Mol-Kelvin    Cal/Mol-Kelvin
 Total                  141.998             40.865            100.516
 Electronic               0.000              0.000              0.000
 Translational            0.889              2.981             40.480
 Rotational               0.889              2.981             29.187
 Vibrational            140.221             34.903             30.849
 Vibration  1             0.599              1.967              4.079
 Vibration  2             0.601              1.959              3.745
 Vibration  3             0.617              1.907              2.721
 Vibration  4             0.640              1.833              2.087
 Vibration  5             0.646              1.813              1.970
 Vibration  6             0.651              1.800              1.902
 Vibration  7             0.654              1.790              1.853
 Vibration  8             0.661              1.769              1.757
 Vibration  9             0.666              1.753              1.692
 Vibration 10             0.678              1.718              1.558
 Vibration 11             0.716              1.607              1.239
 Vibration 12             0.734              1.556              1.126
 Vibration 13             0.744              1.529              1.070
 Vibration 14             0.828              1.313              0.733
 Vibration 15             0.871              1.216              0.620
 Vibration 16             0.892              1.169              0.573
 Vibration 17             0.981              0.988              0.416
                       Q            Log10(Q)             Ln(Q)
 Total Bot       0.280239D-82        -82.552472       -190.084091
 Total V=0       0.263009D+17         16.419971         37.808381
 Vib (Bot)       0.910827D-96        -96.040564       -221.141571
 Vib (Bot)  1    0.283666D+01          0.452808          1.042628
 Vib (Bot)  2    0.238714D+01          0.377877          0.870095
 Vib (Bot)  3    0.138837D+01          0.142506          0.328132
 Vib (Bot)  4    0.970294D+00         -0.013097         -0.030156
 Vib (Bot)  5    0.905105D+00         -0.043301         -0.099704
 Vib (Bot)  6    0.868274D+00         -0.061343         -0.141248
 Vib (Bot)  7    0.842721D+00         -0.074316         -0.171119
 Vib (Bot)  8    0.793714D+00         -0.100336         -0.231032
 Vib (Bot)  9    0.761820D+00         -0.118148         -0.272045
 Vib (Bot) 10    0.697809D+00         -0.156264         -0.359810
 Vib (Bot) 11    0.557141D+00         -0.254035         -0.584938
 Vib (Bot) 12    0.510602D+00         -0.291918         -0.672165
 Vib (Bot) 13    0.488165D+00         -0.311433         -0.717102
 Vib (Bot) 14    0.357337D+00         -0.446922         -1.029076
 Vib (Bot) 15    0.314354D+00         -0.502581         -1.157236
 Vib (Bot) 16    0.296173D+00         -0.528455         -1.216813
 Vib (Bot) 17    0.235500D+00         -0.628009         -1.446045
 Vib (V=0)       0.854828D+03          2.931879          6.750901
 Vib (V=0)  1    0.338039D+01          0.528967          1.217991
 Vib (V=0)  2    0.293894D+01          0.468191          1.078049
 Vib (V=0)  3    0.197566D+01          0.295712          0.680903
 Vib (V=0)  4    0.159154D+01          0.201819          0.464705
 Vib (V=0)  5    0.153403D+01          0.185834          0.427898
 Vib (V=0)  6    0.150195D+01          0.176655          0.406763
 Vib (V=0)  7    0.147989D+01          0.170229          0.391966
 Vib (V=0)  8    0.143807D+01          0.157781          0.363305
 Vib (V=0)  9    0.141125D+01          0.149603          0.344473
 Vib (V=0) 10    0.135845D+01          0.133044          0.306345
 Vib (V=0) 11    0.124860D+01          0.096424          0.222025
 Vib (V=0) 12    0.121464D+01          0.084449          0.194450
 Vib (V=0) 13    0.119879D+01          0.078742          0.181311
 Vib (V=0) 14    0.111456D+01          0.047105          0.108464
 Vib (V=0) 15    0.109061D+01          0.037669          0.086736
 Vib (V=0) 16    0.108114D+01          0.033880          0.078012
 Vib (V=0) 17    0.105268D+01          0.022298          0.051344
 Electronic      0.100000D+01          0.000000          0.000000
 Translational   0.576663D+08          7.760922         17.870183
 Rotational      0.533544D+06          5.727170         13.187296
 ***** Axes restored to original set *****
 -------------------------------------------------------------------
 Center     Atomic                   Forces (Hartrees/Bohr)
 Number     Number              X              Y              Z
 -------------------------------------------------------------------
    1          7           0.000000134   -0.000000034   -0.000000075
    2          6          -0.000000128   -0.000000175    0.000000084
    3          1          -0.000000284   -0.000000022   -0.000000032
    4          6          -0.000000131   -0.000000354   -0.000000004
    5          1          -0.000000371   -0.000000437    0.000000023
    6          1          -0.000000146   -0.000000204    0.000000027
    7          1          -0.000000055   -0.000000496    0.000000023
    8          6           0.000000136    0.000000266   -0.000000063
    9          1           0.000000350    0.000000324   -0.000000032
   10          6          -0.000000013    0.000000384    0.000000010
   11          1          -0.000000182    0.000000343   -0.000000012
   12          1           0.000000035    0.000000603   -0.000000020
   13          1           0.000000091    0.000000304   -0.000000014
   14          6           0.000000373   -0.000000167    0.000000065
   15          1           0.000000550   -0.000000030   -0.000000005
   16          8           0.000000402   -0.000000415   -0.000000006
   17          6          -0.000000205   -0.000000342   -0.000000005
   18          1          -0.000000370   -0.000000436    0.000000023
   19          1           0.000000018   -0.000000525    0.000000025
   20          1          -0.000000149   -0.000000237    0.000000028
   21          6           0.000000030    0.000000390    0.000000010
   22          1           0.000000027    0.000000611   -0.000000021
   23          1          -0.000000234    0.000000341   -0.000000012
   24          1           0.000000124    0.000000307   -0.000000014
 -------------------------------------------------------------------
 Cartesian Forces:  Max     0.000000611 RMS     0.000000250
 1\1\RECHENZENTRUM RWTH AACHEN-SRVMBFD\Freq\RB3LYP\TZVP\C7H15N1O1\JENS\
 13-Nov-2014\0\\# opt=(calcall,tight) b3lyp geom=connectivity tzvp\\Tit
 le Card Required\\0,1\N,-0.0577078126,0.3904272704,-0.0165150175\C,0.6
 676345329,-0.9016582695,0.0343473905\H,-0.1120112477,-1.6640946412,0.0
 650631188\C,1.4992150231,-1.1436834975,-1.2301380773\H,1.9395393074,-2
 .1428159716,-1.1943545292\H,0.8770817371,-1.0802320308,-2.1247922642\H
 ,2.3022691269,-0.413321139,-1.3125463609\C,-1.5314960666,0.3999667973,
 -0.0160410501\H,-1.8078272198,1.4565629193,-0.0578154721\C,-2.11627976
 38,-0.2759463523,-1.2607849053\H,-1.8948938736,-1.345102759,-1.2846362
 835\H,-3.2027733854,-0.1664152852,-1.2702504206\H,-1.7194272139,0.1755
 532746,-2.1712000151\C,0.6185415333,1.5677659742,-0.0636387808\H,-0.06
 2879268,2.4380136171,-0.0977845626\O,1.8292225859,1.7069009371,-0.0698
 643525\C,1.5006935546,-1.0427393394,1.3130712674\H,1.9410252394,-2.041
 5837108,1.3560773424\H,2.3038063424,-0.3081771853,1.3364021003\H,0.879
 5952634,-0.9085531117,2.2006032246\C,-2.1148109032,-0.1751458363,1.279
 0290714\H,-3.2012983105,-0.0651637141,1.2810367492\H,-1.893344427,-1.2
 390581479,1.3872841813\H,-1.7169317544,0.3470702017,2.1503396457\\Vers
 ion=AM64L-G03RevE.01\State=1-A\HF=-405.9153988\RMSD=4.320e-09\RMSF=2.4
 98e-07\ZeroPoint=0.2151729\Thermal=0.2262888\Dipole=-1.4532213,-0.7657
 676,0.0312366\DipoleDeriv=-0.9376236,-0.1893246,0.007793,-0.4328016,-1
 .0353759,0.0232131,0.0174591,0.0230741,-0.4577831,0.3023968,-0.2275998
 ,0.0090706,-0.223395,0.4970412,-0.0050584,0.0089037,-0.0050562,0.36652
 37,-0.0887205,-0.0744607,0.0030125,-0.0832414,-0.0465933,0.0022812,0.0
 033611,0.0022761,0.0095688,0.0012507,0.0158313,0.0349941,0.001299,0.03
 09875,0.0074044,0.0805297,-0.0051984,-0.0410581,0.026492,0.093197,0.01
 75215,0.1088768,-0.1308415,-0.0119836,0.0028648,0.0148533,0.0550082,-0
 .0093083,0.0008718,-0.1077616,0.0165421,0.0664058,0.0182919,-0.0722939
 ,0.0054159,-0.1083643,0.0008089,-0.0428604,0.0289454,-0.0938462,0.0365
 576,0.0306637,-0.018092,-0.00913,0.0574836,0.8165906,0.1131461,-0.0047
 349,0.0609724,0.0930362,0.0119197,-0.0026647,0.0118885,0.3937667,-0.00
 33094,0.0046707,-0.0001788,0.0652649,-0.1267964,0.0053209,-0.0025839,0
 .0053561,0.0080141,-0.0346271,-0.0581226,-0.0171429,-0.0566744,0.08477
 92,-0.0396756,-0.0555378,-0.0467379,-0.0554346,0.0728017,0.0609352,0.0
 015182,0.0391989,-0.1212734,-0.0186961,-0.0133273,0.0324797,0.03435,-0
 .1737291,0.0022426,-0.0272492,0.0250591,0.0588433,-0.0083,0.002616,-0.
 0259061,0.0626405,0.0474838,-0.0400883,0.0760879,-0.0350436,0.0247428,
 0.0586144,0.0441846,0.0358376,-0.0939687,1.5522471,0.6300453,-0.025816
 4,0.5945146,1.3050976,-0.0458629,-0.0244072,-0.0458843,0.1601343,-0.10
 5654,0.1823023,-0.0071345,0.1574575,-0.1095036,0.0069871,-0.0061484,0.
 0069726,0.0685618,-1.3982974,-0.5021351,0.020525,-0.1518312,-0.6734336
 ,0.0119944,0.0066214,0.0121978,-0.3739515,0.0011159,0.0130082,-0.03618
 78,-0.005102,0.0303602,-0.013075,-0.0804276,-0.0004917,-0.0402957,0.02
 64586,0.0915082,-0.0248198,0.1083313,-0.1299094,0.0265607,-0.0114529,-
 0.0002575,0.0541096,0.0008034,-0.0450054,-0.0253909,-0.0921489,0.03499
 39,-0.0287674,0.0255413,0.0109695,0.0590535,-0.0091006,0.0093909,0.107
 2406,0.0221862,0.0634335,-0.0319815,0.0706426,-0.0190891,-0.1056,-0.03
 45375,-0.0565345,0.0216661,-0.0520567,0.0907303,0.0281148,0.0598251,0.
 0351806,-0.0614743,-0.1737014,0.0044352,0.0272556,0.0247926,0.0615684,
 0.0083554,-0.0043234,0.025986,0.059888,0.0728106,0.0605917,-0.0063859,
 0.0401596,-0.1213891,0.0310315,0.0101334,-0.0201687,0.0344571,0.047348
 7,-0.0460452,-0.0728278,-0.0385139,0.0165387,-0.0673525,-0.0414235,-0.
 0445682,-0.0856296\Polar=105.4700315,0.5315505,91.9422912,-0.0327352,-
 0.2603046,85.4023679\PG=C01 [X(C7H15N1O1)]\NImag=0\\0.59270425,0.05849
 607,0.63607068,-0.00259024,-0.02013879,0.13034171,-0.12042155,0.013323
 98,-0.00049523,0.54052600,0.02301079,-0.14440640,0.00323793,0.09247542
 ,0.50661168,-0.00087965,0.00324344,-0.06262044,-0.00372067,-0.00213060
 ,0.45437470,0.01264940,0.01712055,-0.00068720,-0.18208986,-0.13379396,
 0.00538988,0.20405625,-0.01956916,-0.03434773,0.00135241,-0.12239839,-
 0.17165328,0.00507546,0.13250761,0.19615129,0.00076904,0.00133110,-0.0
 0061429,0.00493760,0.00508207,-0.04577898,-0.00534491,-0.00559330,0.05
 739829,-0.01330381,0.01202927,0.01149952,-0.10797524,0.00044668,0.0430
 0462,-0.01462205,0.00335796,0.02364740,0.54288082,0.02530880,-0.017132
 45,-0.02555635,-0.00135692,-0.07712767,-0.00472312,-0.01221612,0.00476
 118,0.01965605,0.01701687,0.57429839,0.00148363,-0.00512722,0.00318936
 ,0.04466184,-0.00694184,-0.14661326,0.00312765,0.00004293,-0.00404725,
 0.05497327,-0.02180516,0.49728896,-0.00195050,0.00301587,0.00413995,-0
 .00760492,0.01605445,-0.00247641,0.00004155,-0.00015573,-0.00072663,-0
 .08787915,0.09373522,-0.00358879,0.09309006,0.00085175,0.00123047,-0.0
 0119692,0.00098954,-0.00517789,0.00152386,0.00033232,0.00068647,-0.000
 29266,0.09483944,-0.26610181,0.00918025,-0.10580159,0.28805454,0.00402
 938,-0.00261448,-0.00371721,0.00898651,-0.02464940,0.00169330,-0.00035
 699,0.00034901,0.00119645,-0.00498078,0.01148165,-0.04850353,0.0025223
 2,-0.01098071,0.05065650,0.00145099,-0.00119737,-0.00061975,0.01071555
 ,-0.00078096,0.01728835,0.00101213,-0.00010246,-0.00083346,-0.13728357
 ,0.00895876,-0.12549172,-0.00772608,-0.00013016,-0.00927942,0.14657749
 ,-0.00071511,0.00084953,0.00001815,-0.00291537,-0.00178873,-0.00471779
 ,0.00022211,0.00001715,0.00044854,0.00844659,-0.04853327,0.01316370,0.
 01685646,-0.00065885,0.02490807,-0.01070388,0.04707045,-0.00042950,0.0
 0142534,0.00257771,-0.01710950,0.00248541,-0.02303335,-0.00005700,0.00
 044089,0.00096114,-0.12223980,0.01198449,-0.21897169,0.00014715,0.0006
 6754,-0.00012300,0.13429025,-0.01379549,0.24075842,0.00117425,0.000494
 53,-0.00080113,-0.01488800,-0.01275509,0.00258803,-0.00095629,0.001070
 50,0.00303649,-0.19375138,-0.13293539,0.01248373,0.01214724,0.00983705
 ,-0.00122305,-0.01307629,-0.01189428,0.00155546,0.20911873,-0.00106229
 ,-0.00005784,0.00050547,0.00506865,0.00488012,-0.00005324,0.00118913,0
 .00102959,-0.00155718,-0.13593110,-0.17109800,0.01455129,-0.02137415,-
 0.01844948,0.00162696,0.00375213,0.00276956,-0.00087888,0.14698604,0.1
 8286769,-0.00199733,-0.00069786,0.00116000,0.02167515,0.02105329,-0.00
 324566,0.00318169,-0.00114743,-0.00451379,0.01062917,0.01180256,-0.049
 18162,0.00121675,0.00124152,-0.00123700,-0.01905972,-0.01891755,0.0026
 1698,-0.01632636,-0.01365733,0.05311683,-0.16696643,0.00467680,-0.0001
 2213,-0.01296355,0.01351986,-0.00053153,-0.00077559,-0.00235993,0.0000
 9466,0.00078019,-0.00198139,0.00030287,0.00068149,-0.00067379,-0.00057
 004,-0.00002233,0.00024532,-0.00001768,-0.00034205,0.00034936,0.000137
 33,0.44744797,0.00380086,-0.11164375,0.00215581,0.02654285,0.00523409,
 -0.00038860,0.00067637,-0.00143665,0.00009339,0.00115286,-0.00319497,0
 .00143035,0.00052910,-0.00021973,-0.00097302,-0.00010374,0.00004184,-0
 .00030131,-0.00004360,-0.00005187,0.00001245,-0.02328031,0.61926376,-0
 .00008753,0.00215525,-0.05735882,-0.00104838,-0.00038108,-0.00415411,-
 0.00002589,0.00009516,0.00092219,0.00139466,-0.00167062,0.00019592,0.0
 0025290,-0.00027442,-0.00057466,0.00002618,-0.00011519,-0.00046650,-0.
 00015998,0.00012644,-0.00001487,0.00092915,-0.00644043,0.45690888,-0.0
 2010591,0.03541892,-0.00139424,-0.00413658,-0.00365857,0.00014827,0.00
 028120,-0.00005424,0.00000186,-0.00030281,0.00076440,-0.00049128,-0.00
 019087,0.00006387,0.00027651,0.00004194,-0.00003369,0.00008710,-0.0000
 4736,-0.00000721,0.00004452,-0.06412971,0.05516609,-0.00217983,0.08406
 891,0.00669353,-0.00193782,0.00006260,-0.00054292,0.00121918,-0.000003
 12,-0.00009305,0.00027680,-0.00001955,0.00009463,-0.00012790,0.0001309
 4,0.00003167,-0.00003498,-0.00007204,-0.00002095,-0.00000368,0.0000000
 1,0.00004281,-0.00000959,-0.00002364,0.06434250,-0.28607675,0.00943055
 ,-0.06412415,0.31193951,-0.00025419,0.00004600,-0.00026459,0.00002460,
 -0.00000132,0.00113255,0.00000341,-0.00001957,-0.00021630,-0.00013424,
 0.00018712,-0.00015107,-0.00002814,0.00000325,0.00005137,-0.00001420,-
 0.00002638,0.00006012,0.00001247,0.00000034,0.00003469,-0.00254402,0.0
 0943585,-0.04789498,0.00252929,-0.01008272,0.05735470,-0.03145423,-0.0
 2299521,-0.02744415,0.00067018,-0.00137605,-0.00124584,-0.00087263,-0.
 00000347,-0.00000676,-0.00003918,0.00002970,0.00015381,-0.00007071,0.0
 0004038,-0.00006112,-0.00018568,0.00004606,-0.00023180,0.00004550,-0.0
 0006755,-0.00009329,-0.08283102,-0.01087978,-0.02235537,0.00329952,0.0
 0193097,0.00524546,0.55532101,-0.00259811,0.00446643,0.00187278,0.0003
 0368,0.00096036,0.00041974,0.00056870,-0.00010284,0.00102292,-0.000015
 23,0.00009590,-0.00037051,0.00001709,-0.00001273,0.00013806,0.00016740
 ,0.00023813,-0.00009128,-0.00011737,-0.00000731,0.00001114,-0.01394384
 ,-0.10529613,-0.03739491,-0.01279153,-0.01504130,-0.02886220,-0.016024
 47,0.55029257,-0.00673505,0.00139007,0.00251868,-0.00013950,0.00068915
 ,-0.00007368,-0.00049500,0.00007494,-0.00013119,0.00013147,0.00025804,
 0.00026927,-0.00009034,0.00000142,-0.00014883,0.00001065,-0.00023088,-
 0.00012415,-0.00000016,0.00001984,0.00003883,-0.02538457,-0.03791454,-
 0.14539883,-0.00058918,-0.00194959,-0.00182593,-0.04387800,-0.04092471
 ,0.50276545,0.00083487,0.00068435,0.00072786,-0.00085083,-0.00061212,-
 0.00048299,-0.00054518,0.00022530,-0.00079879,-0.00007830,0.00026325,-
 0.00018272,-0.00003524,0.00000570,0.00000964,-0.00020232,-0.00015913,0
 .00013464,0.00012690,-0.00003121,0.00005359,0.00225787,-0.01380220,0.0
 0002272,-0.00035302,-0.00133038,-0.00235021,-0.05804358,0.05372024,0.0
 0107073,0.06052181,0.00033858,0.00052728,-0.00004045,0.00002100,-0.000
 97860,0.00058306,0.00058509,0.00061462,-0.00008835,-0.00022838,0.00028
 736,-0.00009671,0.00000602,0.00000381,0.00009234,-0.00013012,-0.000090
 19,0.00024855,0.00012395,-0.00003617,0.00001769,0.00320125,-0.01563611
 ,-0.00063887,-0.00145495,0.00044373,-0.00255406,0.05325879,-0.29578602
 ,-0.00217778,-0.05932922,0.32307700,0.00083225,0.00147380,0.00090716,-
 0.00078699,-0.00086825,0.00021104,-0.00053186,0.00045121,-0.00028773,0
 .00012346,0.00027177,0.00018823,-0.00005304,0.00000997,0.00001111,0.00
 003070,0.00008259,-0.00014113,0.00002122,-0.00002220,-0.00015121,0.007
 51247,-0.02822999,-0.00068199,-0.00240316,-0.00232481,-0.00417768,0.00
 059530,-0.00168622,-0.04808748,0.00162743,0.00448906,0.05024683,-0.001
 17680,-0.00288262,-0.00279343,0.00057489,-0.00057536,0.00022160,-0.000
 01955,-0.00002599,0.00009744,0.00004402,-0.00000585,0.00013733,-0.0000
 3820,0.00004025,-0.00001431,0.00000850,-0.00002809,-0.00011407,-0.0000
 0598,-0.00002020,-0.00003930,-0.01176552,0.00222143,0.00228122,0.00037
 875,-0.00049267,0.00013324,-0.30593449,0.02784867,-0.00104353,-0.00583
 721,0.00086347,0.00021706,0.33299421,-0.00261646,-0.00215153,-0.003251
 98,0.00002539,-0.00086267,0.00004687,0.00012399,0.00038003,-0.00026597
 ,-0.00006118,0.00014640,-0.00000735,-0.00001085,0.00001198,0.00001997,
 -0.00005010,-0.00007393,0.00013784,0.00007939,-0.00002973,0.00000189,-
 0.01474054,0.00092724,0.00119303,-0.00011953,0.00031025,0.00075368,0.0
 2870693,-0.04955934,0.00014944,0.03246370,-0.00240874,-0.00007916,-0.0
 2988231,0.05053945,-0.00401076,-0.00402484,-0.00328607,0.00034285,-0.0
 0078468,-0.00023663,0.00010186,0.00004753,0.00005465,-0.00005764,-0.00
 001357,-0.00028103,0.00004339,0.00001062,0.00010507,0.00000095,0.00005
 443,0.00021445,0.00005669,-0.00004575,0.00002919,-0.02512942,0.0052250
 9,0.00111781,0.00043849,0.00018406,0.00109253,0.00135924,-0.00009284,-
 0.04853693,0.00004393,0.00028969,-0.00096926,0.00084516,0.00207806,0.0
 4985282,0.00173641,0.00105228,0.00047413,-0.00005413,0.00026118,-0.000
 31953,0.00000422,-0.00009136,0.00000220,-0.00011685,-0.00000419,-0.000
 08909,0.00004052,-0.00003071,0.00006136,-0.00030310,0.00019654,0.00000
 149,-0.00001703,-0.00000035,0.00002425,0.00299891,0.00616286,-0.012377
 21,0.00016698,0.00030022,0.00072909,-0.08385536,-0.04161463,0.08238829
 ,0.00228121,0.00305606,-0.00708056,-0.01036114,-0.01406188,0.02660888,
 0.08737743,0.00099800,0.00047319,0.00058566,-0.00027387,-0.00026569,0.
 00034579,0.00003332,0.00017005,-0.00005541,0.00015416,0.00004885,0.000
 42052,-0.00008060,0.00001162,-0.00011548,0.00004598,-0.00005071,-0.000
 26259,-0.00004261,0.00003347,-0.00011652,0.00630276,0.00619894,-0.0138
 6789,0.00062704,0.00076642,0.00040620,-0.04172802,-0.09613449,0.093635
 29,-0.01275919,-0.01226012,0.02623404,0.00140257,0.00107477,-0.0043489
 0,0.04660433,0.10024309,0.00112366,0.00058530,0.00312147,-0.00015911,0
 .00033482,-0.00039056,-0.00000152,-0.00018433,-0.00006133,-0.00011607,
 -0.00012563,-0.00030640,0.00004910,-0.00002895,0.00007765,-0.00003045,
 0.00012582,0.00024034,-0.00000306,0.00000194,0.00006466,0.01131549,0.0
 1215734,-0.02318013,0.00033125,-0.00016109,0.00092390,0.07986196,0.092
 03894,-0.22765614,-0.00094073,-0.00025529,0.00112485,-0.00011717,-0.00
 112163,0.00127476,-0.08789551,-0.09953366,0.24905630,-0.15294039,-0.04
 107804,0.00169198,0.02615386,0.00355523,-0.00015614,-0.00366894,0.0067
 7113,-0.00026677,0.00178040,0.00500827,-0.00254948,-0.00307649,-0.0006
 0215,0.00195401,-0.00008982,-0.00063690,-0.00078967,-0.00307537,0.0022
 8271,0.00278038,-0.03758994,-0.02698427,0.00108678,-0.00223763,-0.0065
 8642,0.00026312,0.00054456,-0.00098657,0.00060024,-0.00027623,0.000419
 08,-0.00016802,0.00083898,0.00046917,0.00018610,-0.00015726,-0.0001237
 8,-0.00066715,0.95745798,-0.06835806,-0.28822848,0.00962474,-0.0042706
 9,-0.04333629,0.00173300,0.00182065,-0.00153618,0.00004986,-0.00078446
 ,0.00208974,-0.00073305,-0.00170131,0.00062429,0.00097973,0.00007701,-
 0.00039291,-0.00081706,-0.00028036,0.00031473,0.00048584,-0.02588571,0
 .00991181,-0.00080071,0.00637433,-0.00314763,0.00014864,0.00740945,-0.
 00225694,-0.00031817,-0.00055009,-0.00027686,-0.00048694,0.00193824,0.
 00135477,0.00176833,-0.00064183,0.00015268,-0.00032474,0.00593889,0.63
 236131,0.00277494,0.00960908,-0.04712221,0.00015446,0.00172836,0.00019
 287,-0.00007028,0.00004698,-0.00025516,-0.00018943,-0.00191154,0.00050
 732,0.00025654,0.00045256,-0.00013977,-0.00020000,-0.00026919,-0.00013
 350,0.00052371,-0.00051059,0.00008729,0.00104307,-0.00080014,-0.010609
 61,-0.00025131,0.00015616,0.00068452,-0.00460831,-0.00046104,0.0006383
 6,0.00011982,-0.00007602,0.00001072,-0.00073828,-0.00055409,-0.0010433
 8,-0.00005285,0.00020920,-0.00000850,-0.00068347,-0.01770728,0.1870303
 6,0.00636096,-0.00892572,0.00035661,-0.00123972,-0.00252383,0.00010420
 ,0.00026198,-0.00050411,0.00001995,-0.00041910,0.00015166,0.00021528,0
 .00008539,0.00019287,0.00003264,0.00009977,0.00006286,0.00004701,0.000
 25534,-0.00010971,-0.00028241,-0.00062544,-0.00431185,0.00017083,-0.00
 035054,-0.00118876,0.00004750,0.00041607,0.00002442,0.00014240,-0.0000
 2928,-0.00014965,-0.00006397,0.00008060,0.00003422,0.00008891,-0.00002
 543,0.00003488,-0.00003662,-0.11744397,0.10321929,-0.00406269,0.157831
 03,0.01690091,-0.03569893,0.00181998,-0.00595538,-0.00037594,0.0002439
 5,0.00090260,-0.00182419,0.00007799,0.00017876,0.00011927,0.00007620,0
 .00004377,-0.00007421,-0.00013621,-0.00000658,-0.00002589,-0.00010836,
 -0.00002582,0.00002383,-0.00007212,0.00414845,-0.00199027,0.00003005,-
 0.00206715,0.00121226,-0.00003941,-0.00072369,0.00036799,-0.00015654,0
 .00017392,0.00030156,0.00024339,-0.00012488,-0.00005614,-0.00012989,0.
 00003580,-0.00009529,-0.00003274,0.08915159,-0.19748957,0.00546626,-0.
 11123751,0.22000245,-0.00066847,0.00183502,0.01032893,0.00024040,0.000
 24195,0.00567310,-0.00003589,0.00007880,0.00015072,-0.00056425,0.00142
 203,0.00003690,-0.00007013,0.00022495,0.00026995,0.00002092,-0.0000348
 0,-0.00001879,0.00031401,-0.00001515,-0.00016893,-0.00016498,0.0000349
 7,-0.00117389,0.00008236,-0.00003993,0.00019064,0.00011140,-0.00038173
 ,0.00009892,-0.00003525,-0.00001885,-0.00007483,0.00003132,-0.00000212
 ,0.00001361,-0.00000454,-0.00001406,-0.00002534,-0.00350433,0.00545804
 ,-0.05868161,0.00433796,-0.00768232,0.02512728,-0.06592588,-0.06065157
 ,0.00245578,-0.00686868,0.01073100,-0.00042485,0.00123508,-0.00099332,
 0.00003896,-0.00075780,-0.00236508,0.00200719,0.00187978,0.00026830,-0
 .00120644,0.00022013,0.00048498,0.00051581,0.00182341,-0.00095979,-0.0
 0166435,0.01201361,-0.00462975,0.00018209,0.00062491,0.00066832,-0.000
 02703,-0.00324226,0.00103217,0.00161268,0.00010378,-0.00058650,-0.0001
 5309,-0.00099353,-0.00081140,-0.00112618,0.00023069,0.00019315,0.00005
 603,-0.66271202,-0.03014170,0.00154007,-0.04572113,0.00903661,-0.00032
 164,0.76882796,-0.06240720,0.00093021,0.00068483,0.00166090,0.00679659
 ,-0.00046775,-0.00043076,0.00084403,-0.00001616,0.00176585,-0.00136688
 ,-0.00141594,-0.00056452,-0.00067784,-0.00004458,-0.00043593,-0.000440
 64,-0.00014130,-0.00141105,-0.00216174,-0.00000850,0.00467606,-0.00647
 478,0.00061707,-0.00141028,0.00113662,-0.00005356,-0.00223158,0.000697
 07,0.00040723,0.00018686,0.00020154,0.00011583,-0.00049973,-0.00031067
 ,-0.00059351,0.00014590,-0.00009732,-0.00008436,-0.04230635,-0.1119455
 6,0.00165714,0.02500292,0.01511292,0.00010226,0.08146035,0.10155289,0.
 00252539,0.00068383,0.01724273,-0.00006482,-0.00047301,-0.00494502,0.0
 0001663,-0.00001584,0.00043109,0.00219193,-0.00152974,-0.00074834,-0.0
 0070535,-0.00085734,-0.00003053,-0.00001150,0.00006758,-0.00001852,-0.
 00148814,-0.00067050,-0.00022620,-0.00018728,0.00062245,0.00911512,0.0
 0005548,-0.00005476,-0.00023133,0.00191074,0.00016059,-0.00061353,-0.0
 0000384,0.00008242,0.00001071,0.00025538,0.00031219,0.00045665,-0.0000
 1779,-0.00012211,-0.00007196,0.00202292,0.00165007,-0.07088104,-0.0009
 5537,0.00011152,0.01805095,-0.00366007,-0.00273069,0.03405875,-0.01332
 065,0.01108754,-0.01239934,-0.10807699,-0.00296011,-0.04295005,-0.0146
 5271,0.00147324,-0.02382589,0.01209095,-0.00198880,0.01379010,0.000354
 08,0.00000766,-0.00012146,-0.00187409,0.00074773,0.00502219,0.00074857
 ,0.00016100,0.00050770,0.00077826,0.00103717,-0.00148227,-0.00030212,0
 .00010482,0.00012651,-0.00021754,-0.00020019,0.00011178,0.00004968,0.0
 0012622,0.00015009,-0.00004013,0.00003445,-0.00007408,-0.00006017,0.00
 018693,0.00001031,0.00178338,-0.00076627,0.00024938,-0.00041870,0.0002
 2285,0.00054892,-0.00076264,0.00158823,-0.00232519,0.54275158,0.025142
 88,-0.01458216,0.02694061,-0.00489202,-0.07664221,-0.00083250,-0.01244
 826,0.00314997,-0.02021274,-0.00307841,0.00249327,-0.00212170,-0.00000
 023,-0.00017154,-0.00044030,0.00079587,0.00011093,-0.00114321,0.000626
 06,-0.00013935,0.00063298,-0.00199709,-0.00315467,0.00193939,0.0008007
 3,-0.00015322,-0.00018789,0.00007505,-0.00044362,-0.00027032,0.0001539
 7,0.00051829,0.00018973,0.00007908,0.00037190,0.00010135,-0.00004436,0
 .00004767,-0.00005499,0.00519664,0.00228852,0.00176385,0.00013249,0.00
 000036,-0.00141930,-0.00251492,-0.00113023,0.00156314,0.01262567,0.577
 25946,-0.00346841,0.00652733,0.00065587,-0.04445903,0.00138408,-0.1469
 9694,-0.00213543,-0.00061674,-0.00240538,-0.01364009,-0.00060315,-0.03
 181549,-0.00092745,0.00068635,0.00077400,0.00260050,-0.00059798,-0.003
 47974,-0.00105995,0.00027732,0.00185362,-0.00014564,-0.00116515,0.0001
 5751,0.00042935,-0.00013091,-0.00012644,0.00017457,0.00017201,-0.00012
 794,-0.00005052,-0.00010534,-0.00008927,0.00004432,-0.00005373,0.00007
 799,0.00003106,-0.00011060,-0.00002420,0.00214285,0.00059222,0.0003055
 4,-0.00022596,-0.00007354,0.00015542,-0.00181363,0.00144457,-0.0009801
 7,-0.05620458,0.01543464,0.49445731,-0.00196017,0.00268096,-0.00436828
 ,-0.00761329,0.01622945,0.00120479,0.00004280,-0.00009798,0.00073804,0
 .00035531,0.00007386,0.00092503,0.00044288,-0.00026422,-0.00010128,-0.
 00009347,-0.00023806,0.00010522,0.00003498,-0.00006218,0.00000071,0.00
 068186,0.00050844,-0.00029560,-0.00019117,0.00003390,0.00002581,-0.000
 09318,0.00006157,0.00004161,-0.00001126,-0.00005179,-0.00002192,-0.000
 03424,-0.00004930,-0.00002600,0.00000642,0.00000160,0.00001052,-0.0030
 7894,-0.00171732,-0.00011736,0.00008542,0.00004937,0.00006665,0.001882
 01,-0.00050685,0.00074561,-0.08787847,0.09372387,-0.00380531,0.0930945
 7,0.00053078,0.00150038,0.00078165,0.00027307,-0.00330835,-0.00112662,
 0.00035999,0.00068520,0.00033286,0.00001652,-0.00018504,-0.00061016,-0
 .00025510,0.00071424,0.00020913,-0.00021311,0.00034178,0.00007813,0.00
 006098,-0.00012874,-0.00002423,-0.00062625,-0.00012340,0.00023928,0.00
 004177,-0.00002901,0.00000309,0.00015027,-0.00001164,-0.00002711,-0.00
 000696,0.00001793,-0.00000460,0.00004742,0.00002772,0.00004233,-0.0000
 0850,-0.00001832,-0.00000578,-0.00075555,0.00050644,-0.00050305,0.0001
 8944,-0.00007907,-0.00019743,0.00036401,-0.00060251,0.00090237,0.09493
 761,-0.26637549,0.00803142,-0.10566946,0.28830749,-0.00408648,0.002196
 69,-0.00397745,-0.00902695,0.02502858,-0.00016785,0.00033085,-0.000308
 27,0.00119646,0.00012100,0.00051645,0.00078628,0.00012055,-0.00032149,
 -0.00070268,0.00003677,-0.00024522,0.00039073,0.00006706,0.00010107,-0
 .00006133,0.00062012,0.00093653,-0.00067136,-0.00028042,0.00007841,0.0
 0004568,-0.00011127,0.00000722,0.00007442,-0.00000997,-0.00004819,-0.0
 0000905,-0.00002634,-0.00005103,-0.00005694,-0.00000065,0.00002426,0.0
 0001683,-0.00189663,-0.00102902,-0.00001946,-0.00004759,0.00016390,0.0
 0027478,0.00117908,0.00009059,-0.00010809,-0.00250531,0.00573136,-0.04
 823055,0.00582124,-0.00779108,0.05039902,0.00117752,0.00055732,0.00075
 934,-0.01491577,-0.01294432,-0.00155346,-0.00096362,0.00082737,-0.0031
 1608,0.00074918,0.00070751,0.00100834,0.00003490,0.00005550,-0.0000717
 9,0.00002150,0.00017735,0.00006037,0.00053611,-0.00014659,-0.00048064,
 -0.00034204,-0.00003078,0.00016332,-0.00004743,0.00004172,-0.00001574,
 0.00008247,-0.00012080,-0.00005718,0.00003751,0.00013160,0.00005874,0.
 00002693,0.00008927,0.00003214,-0.00001926,0.00002152,-0.00003079,-0.0
 0307928,-0.00032140,-0.00049615,0.00025531,-0.00005057,-0.00031148,0.0
 0182716,-0.00128867,0.00159288,-0.19376473,-0.13350802,-0.00173933,0.0
 1214781,0.00990190,0.00042414,0.20914192,-0.00090117,-0.00003497,-0.00
 040944,0.00333505,0.00317033,-0.00046064,0.00093460,0.00120837,0.00110
 128,0.00012008,-0.00019880,-0.00011433,-0.00006216,-0.00013439,-0.0000
 9519,0.00016637,0.00006360,-0.00001919,-0.00010828,0.00025326,-0.00019
 757,0.00033724,-0.00006262,-0.00012304,-0.00001071,-0.00000747,0.00000
 303,-0.00009743,0.00001600,0.00002937,-0.00002245,-0.00002313,-0.00001
 971,-0.00004585,-0.00003834,-0.00004345,0.00000708,0.00000775,0.000012
 32,0.00205590,0.00031517,0.00049011,-0.00008700,0.00002952,-0.00000051
 ,-0.00082409,-0.00209585,0.00082005,-0.13635053,-0.17240294,-0.0045951
 5,-0.02140493,-0.01856748,-0.00022420,0.14782029,0.18419821,0.00207524
 ,0.00079213,0.00113386,-0.02199411,-0.02154741,-0.00150812,-0.00327022
 ,0.00069165,-0.00468525,-0.00051754,-0.00047060,0.00191245,0.00000412,
 0.00002998,-0.00005561,0.00024586,0.00028438,0.00021460,0.00048952,0.0
 0013574,-0.00052634,-0.00016420,-0.00000861,-0.00000412,-0.00004372,0.
 00002695,0.00003264,0.00000840,-0.00017345,-0.00000436,0.00006630,0.00
 015972,0.00007720,0.00000594,0.00010395,0.00002012,-0.00001809,0.00004
 543,-0.00001144,-0.00294893,-0.00050346,0.00009077,0.00028972,0.000056
 39,-0.00017459,0.00173274,0.00015858,-0.00029586,0.00034695,-0.0018497
 9,-0.04786345,0.00046573,0.00012490,-0.00111955,0.00444290,0.00306270,
 0.05176326,0.00145230,-0.00114598,0.00071410,0.01071546,-0.00215409,-0
 .01721118,0.00101317,-0.00003655,0.00083896,-0.00188301,0.00058834,-0.
 00265737,-0.00009362,-0.00021542,-0.00001921,0.00068848,-0.00014474,-0
 .00099547,0.00002113,0.00014640,-0.00025804,-0.00002235,-0.00010519,-0
 .00001842,0.00004186,-0.00001975,0.00001583,0.00000996,-0.00001073,0.0
 0000450,-0.00000090,0.00000065,-0.00001732,0.00000492,0.00000189,0.000
 00465,0.00000630,-0.00001368,0.00002207,-0.00008866,0.00009357,0.00019
 313,0.00009969,-0.00000809,-0.00002049,0.00021955,-0.00043348,0.000045
 73,-0.13699718,0.01885100,0.12429423,-0.00771630,0.00060538,0.00927063
 ,-0.01305557,0.00525255,0.01871957,0.14626710,-0.00067870,0.00074640,0
 .00012822,-0.00154718,-0.00174565,0.00302782,0.00022545,-0.00004720,-0
 .00036867,0.00034776,0.00022590,0.00030306,-0.00024534,0.00035531,0.00
 024833,-0.00006533,0.00056887,0.00005666,0.00017170,0.00004358,-0.0002
 7097,0.00024604,0.00007155,0.00007213,-0.00004046,-0.00000119,0.000031
 30,-0.00000925,0.00002538,0.00000257,0.00000032,-0.00002418,-0.0000198
 9,-0.00001212,-0.00000806,-0.00000375,0.00000292,-0.00001036,0.0000022
 8,-0.00057200,-0.00030543,0.00028351,0.00005898,-0.00001454,0.00003440
 ,0.00044251,-0.00043217,-0.00003520,0.01808135,-0.05159240,-0.02649800
 ,0.01676330,-0.00267689,-0.02472494,-0.01195760,0.00433297,0.01879423,
 -0.02128420,0.05046887,0.00048618,-0.00127844,0.00267954,0.01724734,-0
 .00417617,-0.02307640,0.00003922,-0.00036069,0.00102448,-0.00506760,0.
 00084814,-0.00358580,-0.00008548,-0.00007506,0.00037734,0.00100116,-0.
 00022840,-0.00159256,-0.00007399,0.00003262,0.00023499,-0.00000236,0.0
 0025866,-0.00049618,-0.00008414,0.00000489,0.00005771,-0.00007029,-0.0
 0008872,0.00001173,0.00006180,0.00006975,-0.00002390,-0.00004025,0.000
 03503,0.00000215,0.00003236,-0.00004302,0.00008261,0.00083755,0.000830
 58,-0.00022215,-0.00005199,0.00010803,-0.00003006,-0.00055291,0.000174
 72,-0.00002641,0.12109318,-0.02531954,-0.21619893,-0.00147155,-0.00046
 518,0.00188527,-0.00059146,0.00073640,0.00103285,-0.13291248,0.0289554
 2,0.23767035,-0.03141344,-0.02074799,0.02921968,0.00067183,-0.00127384
 ,0.00135021,-0.00087211,-0.00000298,0.00000794,-0.00021787,0.00006131,
 -0.00017989,-0.00009311,0.00015866,0.00009921,0.00001003,-0.00000366,0
 .00007080,0.00008253,-0.00009783,-0.00000076,-0.08277493,-0.00903502,0
 .02306999,0.00329466,0.00151171,-0.00538949,0.00745735,0.00511510,-0.0
 0773947,-0.00011280,-0.00025081,0.00025731,-0.00002284,0.00023561,-0.0
 0023967,-0.00087505,-0.00146102,-0.00333225,0.00054883,0.00775187,0.00
 400657,0.00041581,-0.00073009,-0.00005409,-0.00324626,-0.00237643,-0.0
 0172475,-0.00003950,0.00001714,-0.00015531,-0.00007053,0.00004509,0.00
 005764,0.00004562,-0.00005996,0.00009834,-0.00018542,0.00006453,0.0002
 2746,0.55542378,-0.00205688,0.00419742,-0.00200512,0.00031322,0.000866
 29,-0.00049488,0.00060503,-0.00018979,-0.00101898,-0.00020859,-0.00043
 387,-0.00014744,0.00005809,-0.00000954,-0.00000062,-0.00001095,0.00003
 210,0.00008711,-0.00011569,0.00002726,0.00017108,-0.01185001,-0.099597
 47,0.03376643,-0.01267100,-0.01252359,0.02972761,0.00569667,0.00706861
 ,-0.01360703,0.00044267,0.00075949,-0.00078651,0.00032576,0.00020792,0
 .00046193,-0.00121060,-0.00096027,-0.00399891,-0.00103037,-0.00217751,
 0.00068591,0.00001347,0.00040886,0.00035707,0.00090099,0.00064405,-0.0
 0026153,-0.00002515,0.00010588,0.00038354,0.00002402,-0.00002461,-0.00
 014797,-0.00011700,-0.00000946,-0.00000717,0.00016612,0.00026129,0.000
 06043,-0.01245434,0.55646162,0.00695917,-0.00149982,0.00274700,0.00011
 421,-0.00076242,0.00001873,0.00044934,-0.00007029,-0.00004480,-0.00009
 546,0.00029458,-0.00013738,-0.00004616,0.00003360,0.00007224,-0.000003
 64,-0.00000418,0.00000493,0.00006646,-0.00003178,-0.00001569,0.0263325
 2,0.03428266,-0.15115390,0.00159238,0.00279830,-0.00433878,0.00726385,
 0.01043602,-0.03273862,0.00079312,0.00080525,0.00210243,0.00097002,0.0
 0043401,0.00070404,-0.00176564,-0.00223280,-0.00333383,-0.00052013,0.0
 0053309,0.00055457,-0.00014430,0.00013276,0.00005831,-0.00168633,-0.00
 050439,-0.00055648,-0.00012952,-0.00024506,0.00025963,0.00008862,-0.00
 001135,-0.00013712,0.00000945,-0.00001594,0.00004087,-0.00002383,0.000
 20015,-0.00014756,0.04494361,0.03666815,0.49649404,-0.00116868,-0.0026
 4768,0.00301013,0.00057426,-0.00059022,-0.00017631,-0.00001978,-0.0000
 3371,-0.00009499,-0.00004010,0.00007519,-0.00005031,-0.00003418,0.0000
 4930,0.00002247,0.00000496,-0.00000888,0.00004108,0.00002688,-0.000046
 12,-0.00000229,-0.01173853,0.00202820,-0.00243473,0.00037813,-0.000501
 81,-0.00009290,-0.00002370,0.00024739,-0.00099191,-0.00002855,-0.00004
 580,0.00003019,0.00089935,0.00002829,0.00026827,0.00040679,-0.00012824
 ,0.00002537,0.00083950,0.00198841,0.00058030,0.00008047,-0.00012682,-0
 .00002142,-0.00099246,-0.00051761,-0.00021334,0.00004393,-0.00001674,-
 0.00013680,-0.00003824,0.00004126,0.00001125,-0.00000600,-0.00001697,0
 .00004081,0.00000863,-0.00001900,0.00011618,-0.30593738,0.02785467,-0.
 00087007,0.33299489,-0.00228677,-0.00158355,0.00311916,-0.00000192,-0.
 00080043,-0.00000204,0.00011582,0.00039525,0.00023876,0.00004027,0.000
 36629,0.00003077,-0.00004703,0.00002788,0.00004435,0.00000148,-0.00001
 047,-0.00003403,0.00008632,-0.00004276,-0.00009905,-0.01270337,0.00042
 183,-0.00112292,-0.00015470,0.00024110,-0.00068580,0.00025341,0.000140
 24,-0.00038943,0.00015777,-0.00000486,-0.00000011,0.00000681,0.0003305
 0,-0.00008959,-0.00006620,-0.00017881,-0.00009137,0.00045338,0.0012436
 7,0.00037170,0.00002707,-0.00004526,0.00000677,-0.00071986,-0.00028357
 ,-0.00025249,-0.00005645,0.00014537,-0.00002648,-0.00001427,0.00001015
 ,-0.00001241,0.00007464,-0.00002590,0.00000240,-0.00005015,-0.00008730
 ,-0.00011379,0.02851952,-0.04955975,-0.00010114,-0.02986954,0.05020926
 ,0.00420257,0.00389238,-0.00386218,-0.00034475,0.00083020,-0.00029825,
 -0.00011130,-0.00007456,0.00003968,0.00007126,-0.00012437,0.00008358,0
 .00002979,-0.00004914,-0.00005716,-0.00000479,0.00000476,0.00000452,-0
 .00003911,0.00004850,0.00002458,0.02623381,-0.00517317,0.00159625,-0.0
 0042674,-0.00011577,0.00116229,0.00022114,-0.00041741,0.00077260,-0.00
 001399,-0.00002001,-0.00011466,-0.00027168,-0.00000608,-0.00087271,-0.
 00023643,0.00014871,0.00038188,-0.00022482,-0.00195246,-0.00093278,-0.
 00009142,0.00013473,0.00000287,0.00118861,0.00065291,0.00042847,0.0000
 6193,-0.00002031,-0.00027991,-0.00004223,-0.00000312,0.00010694,-0.000
 06276,0.00005015,0.00002538,0.00000328,-0.00003041,0.00022769,-0.00333
 331,0.00014201,-0.04853370,0.00119957,-0.00207182,0.05018238,0.0008330
 4,0.00062284,-0.00077961,-0.00084936,-0.00057082,0.00053117,-0.0005436
 9,0.00028733,0.00077879,0.00004955,0.00015723,0.00003802,-0.00001122,-
 0.00000614,0.00001049,-0.00000096,-0.00000456,-0.00006165,0.00003736,-
 0.00002760,-0.00006426,0.00224973,-0.01372758,0.00106516,-0.00034742,-
 0.00113767,0.00244352,-0.00011403,0.00037948,-0.00082318,0.00029729,0.
 00021593,-0.00004444,-0.00002857,0.00015838,0.00000134,-0.00010616,-0.
 00010348,-0.00010272,-0.00027618,-0.00055727,-0.00007556,-0.00002916,0
 .00017587,0.00002132,0.00010398,0.00018643,-0.00001108,-0.00007822,0.0
 0027660,0.00016160,-0.00003519,0.00000491,-0.00001000,0.00012681,-0.00
 003535,-0.00005127,-0.00020249,-0.00016939,-0.00012151,-0.05805079,0.0
 5348100,-0.00531464,-0.00583915,0.03235845,-0.00261103,0.06052390,0.00
 027166,0.00041638,0.00007917,0.00008274,-0.00094858,-0.00049099,0.0006
 2542,0.00058030,0.00001858,0.00011401,0.00050780,0.00005774,-0.0000498
 3,0.00002193,0.00004579,0.00000194,-0.00002812,-0.00006942,0.00012635,
 -0.00003357,-0.00015106,0.00259699,-0.01326091,0.00163591,-0.00125737,
 0.00080025,0.00215967,-0.00027118,0.00076645,-0.00069870,0.00021948,0.
 00049445,0.00060914,-0.00004804,-0.00000396,0.00001126,-0.00010956,0.0
 0025283,0.00004246,0.00043119,-0.00023058,0.00009471,-0.00014411,0.000
 28146,-0.00000931,-0.00057263,0.00018470,-0.00009559,-0.00023733,0.000
 27290,0.00009024,0.00001010,-0.00000422,-0.00009113,0.00012183,-0.0000
 3654,-0.00002694,-0.00013243,-0.00011665,-0.00025034,0.05305924,-0.293
 92941,0.02166176,0.00084349,-0.00241772,-0.00017551,-0.05929057,0.3206
 5890,-0.00085632,-0.00143548,0.00101992,0.00078409,0.00096108,0.000179
 51,0.00048417,-0.00052060,-0.00025486,-0.00015978,-0.00023737,-0.00007
 865,0.00002595,0.00000214,-0.00001309,0.00001719,0.00002023,-0.0000199
 1,-0.00006892,0.00002856,0.00008779,-0.00774747,0.02924626,-0.00304891
 ,0.00250615,0.00193026,-0.00453981,-0.00023403,0.00089228,0.00209669,0
 .00002644,-0.00067328,-0.00030941,-0.00002656,-0.00000888,-0.00011553,
 0.00014139,-0.00035977,0.00025236,0.00013458,0.00050677,-0.00003563,0.
 00007558,-0.00027192,-0.00005484,0.00019900,-0.00012989,0.00002735,-0.
 00010466,-0.00027882,0.00020262,0.00005246,-0.00000876,0.00001910,-0.0
 0003130,0.00001312,-0.00015075,-0.00002019,-0.00008433,-0.00011448,-0.
 00480415,0.02116971,-0.04993690,-0.00027918,0.00015691,-0.00095833,0.0
 0306958,-0.02591911,0.05266268,0.00173444,0.00101091,-0.00055435,-0.00
 005357,0.00028528,0.00029748,0.00000423,-0.00009105,0.00000495,-0.0000
 6023,-0.00004662,-0.00002742,0.00000641,-0.00000842,0.00000134,0.00000
 623,0.00000035,-0.00003241,-0.00001921,0.00000848,0.00001749,0.0029995
 1,0.00710784,0.01182020,0.00016572,0.00024172,-0.00074971,-0.00086903,
 -0.00106248,0.00185271,-0.00010620,-0.00012046,-0.00013186,0.00040704,
 -0.00004712,0.00024090,0.00069506,0.00010826,0.00062737,-0.00015639,-0
 .00063525,0.00010370,-0.00002538,0.00003609,0.00000168,0.00023063,0.00
 014694,0.00000580,-0.00011662,0.00000300,0.00008894,0.00004040,-0.0000
 3544,-0.00005870,-0.00001705,-0.00000227,-0.00002406,-0.00030305,0.000
 19569,-0.00001645,-0.08403840,-0.04813112,-0.07898303,-0.01039103,-0.0
 1612471,-0.02539761,0.00229093,0.00360860,0.00681597,0.08757556,0.0009
 0532,0.00039722,-0.00037012,-0.00026081,-0.00032025,-0.00035109,0.0000
 3338,0.00018755,0.00003558,0.00018565,0.00006030,0.00010367,0.00000073
 ,-0.00001956,-0.00002136,-0.00001533,-0.00000656,0.00005013,0.00002384
 ,0.00000307,-0.00004661,0.00539960,0.00614902,0.01152939,0.00059839,0.
 00074802,-0.00039287,-0.00119001,-0.00048276,0.00200744,-0.00009458,0.
 00027791,0.00035785,-0.00013000,-0.00017981,-0.00010392,0.00005901,0.0
 0059006,0.00070224,-0.00007076,0.00016082,-0.00022258,0.00003769,-0.00
 009116,0.00001924,0.00018823,-0.00008086,0.00012260,0.00016236,0.00002
 331,-0.00044692,-0.00008410,0.00002345,0.00011988,-0.00004209,0.000042
 72,0.00011831,0.00004857,-0.00003808,0.00028467,-0.04804580,-0.1116255
 4,-0.10280117,0.00141293,0.00150883,0.00432977,-0.01267401,-0.01422809
 ,-0.02499909,0.05355179,0.11690041,-0.00119752,-0.00036984,0.00319935,
 0.00017997,-0.00034075,-0.00033656,-0.00000122,0.00016465,-0.00007882,
 -0.00002506,0.00004832,-0.00003677,-0.00001060,0.00000869,0.00001807,-
 0.00002084,0.00000481,0.00007887,0.00002900,-0.00001349,-0.00000681,-0
 .01181018,-0.01449684,-0.02313079,-0.00037900,0.00017481,0.00094359,0.
 00343434,0.00377332,-0.00381735,0.00011098,-0.00004435,0.00022733,-0.0
 0001515,0.00013608,0.00038262,-0.00063661,-0.00087230,-0.00154779,0.00
 067502,0.00031198,-0.00001752,0.00003374,0.00003793,-0.00002951,-0.000
 07153,0.00008489,-0.00008835,0.00010330,0.00009940,-0.00028110,-0.0000
 4252,0.00003331,0.00006595,0.00000651,-0.00000020,0.00005543,0.0000273
 1,-0.00010391,0.00022771,-0.07645562,-0.10120482,-0.21198204,0.0000186
 3,0.00112166,0.00087059,0.00194996,0.00147168,0.00308310,0.08409707,0.
 10997495,0.23220080\\-0.00000013,0.00000003,0.00000008,0.00000013,0.00
 000018,-0.00000008,0.00000028,0.00000002,0.00000003,0.00000013,0.00000
 035,0.,0.00000037,0.00000044,-0.00000002,0.00000015,0.00000020,-0.0000
 0003,0.00000006,0.00000050,-0.00000002,-0.00000014,-0.00000027,0.00000
 006,-0.00000035,-0.00000032,0.00000003,0.00000001,-0.00000038,0.,0.000
 00018,-0.00000034,0.00000001,-0.00000003,-0.00000060,0.00000002,-0.000
 00009,-0.00000030,0.00000001,-0.00000037,0.00000017,-0.00000007,-0.000
 00055,0.00000003,0.,-0.00000040,0.00000042,0.,0.00000021,0.00000034,0.
 ,0.00000037,0.00000044,-0.00000002,-0.00000002,0.00000052,-0.00000002,
 0.00000015,0.00000024,-0.00000003,-0.00000003,-0.00000039,0.,-0.000000
 03,-0.00000061,0.00000002,0.00000023,-0.00000034,0.00000001,-0.0000001
 2,-0.00000031,0.00000001\\\@


 ...THOSE SCIENCES ARE VAIN AND FULL OF ERRORS WHICH 
 ARE NOT BORN FROM EXPERIMENT, THE MOTHER OF CERTAINTY...

                          -- LEONARDO DA VINCI, 1452-1519
 Job cpu time:  0 days  9 hours  2 minutes 45.2 seconds.
 File lengths (MBytes):  RWF=    134 Int=      0 D2E=      0 Chk=     10 Scr=      1
 Normal termination of Gaussian 03 at Thu Nov 13 16:02:33 2014.
