# Supplementary material for: CO from CO2and fluctuating renewable energy via formic-acid derivatives
Source: Royal Society of Chemistry journal article supplement (doi:10.1039/c6gc01202g), 2016-01-01
Supplement: c6gc01202g7.log [file c6gc01202g7.log]

 Entering Gaussian System, Link 0=/opt/mbfd/GAUSSIAN/LINUX64/g03.e01/g03
 Input=DMA_geoopt_Freq.com
 Output=DMA_geoopt_Freq.log
 Initial command:
 /opt/mbfd/GAUSSIAN/LINUX64/g03.e01/l1.exe /gaussianscratch/Gau-28736.inp -scrdir=/gaussianscratch/
 Entering Link 1 = /opt/mbfd/GAUSSIAN/LINUX64/g03.e01/l1.exe PID=     28740.
  
 Copyright (c) 1988,1990,1992,1993,1995,1998,2003,2004,2007, Gaussian, Inc.
                  All Rights Reserved.
  
 This is the Gaussian(R) 03 program.  It is based on the
 the Gaussian(R) 98 system (copyright 1998, Gaussian, Inc.),
 the Gaussian(R) 94 system (copyright 1995, Gaussian, Inc.),
 the Gaussian 92(TM) system (copyright 1992, Gaussian, Inc.),
 the Gaussian 90(TM) system (copyright 1990, Gaussian, Inc.),
 the Gaussian 88(TM) system (copyright 1988, Gaussian, Inc.),
 the Gaussian 86(TM) system (copyright 1986, Carnegie Mellon
 University), and the Gaussian 82(TM) system (copyright 1983,
 Carnegie Mellon University). Gaussian is a federally registered
 trademark of Gaussian, Inc.
  
 This software contains proprietary and confidential information,
 including trade secrets, belonging to Gaussian, Inc.
  
 This software is provided under written license and may be
 used, copied, transmitted, or stored only in accord with that
 written license.
  
 The following legend is applicable only to US Government
 contracts under FAR:
  
                    RESTRICTED RIGHTS LEGEND
  
 Use, reproduction and disclosure by the US Government is
 subject to restrictions as set forth in subparagraphs (a)
 and (c) of the Commercial Computer Software - Restricted
 Rights clause in FAR 52.227-19.
  
 Gaussian, Inc.
 340 Quinnipiac St., Bldg. 40, Wallingford CT 06492
  
  
 ---------------------------------------------------------------
 Warning -- This program may not be used in any manner that
 competes with the business of Gaussian, Inc. or will provide
 assistance to any competitor of Gaussian, Inc.  The licensee
 of this program is prohibited from giving any competitor of
 Gaussian, Inc. access to this program.  By using this program,
 the user acknowledges that Gaussian, Inc. is engaged in the
 business of creating and licensing software in the field of
 computational chemistry and represents and warrants to the
 licensee that it is not a competitor of Gaussian, Inc. and that
 it will not use this program in any manner prohibited above.
 ---------------------------------------------------------------
  

 Cite this work as:
 Gaussian 03, Revision E.01,
 M. J. Frisch, G. W. Trucks, H. B. Schlegel, G. E. Scuseria, 
 M. A. Robb, J. R. Cheeseman, J. A. Montgomery, Jr., T. Vreven, 
 K. N. Kudin, J. C. Burant, J. M. Millam, S. S. Iyengar, J. Tomasi, 
 V. Barone, B. Mennucci, M. Cossi, G. Scalmani, N. Rega, 
 G. A. Petersson, H. Nakatsuji, M. Hada, M. Ehara, K. Toyota, 
 R. Fukuda, J. Hasegawa, M. Ishida, T. Nakajima, Y. Honda, O. Kitao, 
 H. Nakai, M. Klene, X. Li, J. E. Knox, H. P. Hratchian, J. B. Cross, 
 V. Bakken, C. Adamo, J. Jaramillo, R. Gomperts, R. E. Stratmann, 
 O. Yazyev, A. J. Austin, R. Cammi, C. Pomelli, J. W. Ochterski, 
 P. Y. Ayala, K. Morokuma, G. A. Voth, P. Salvador, J. J. Dannenberg, 
 V. G. Zakrzewski, S. Dapprich, A. D. Daniels, M. C. Strain, 
 O. Farkas, D. K. Malick, A. D. Rabuck, K. Raghavachari, 
 J. B. Foresman, J. V. Ortiz, Q. Cui, A. G. Baboul, S. Clifford, 
 J. Cioslowski, B. B. Stefanov, G. Liu, A. Liashenko, P. Piskorz, 
 I. Komaromi, R. L. Martin, D. J. Fox, T. Keith, M. A. Al-Laham, 
 C. Y. Peng, A. Nanayakkara, M. Challacombe, P. M. W. Gill, 
 B. Johnson, W. Chen, M. W. Wong, C. Gonzalez, and J. A. Pople, 
 Gaussian, Inc., Wallingford CT, 2004.
 
 ******************************************
 Gaussian 03:  AM64L-G03RevE.01 11-Sep-2007
                 3-Sep-2013 
 ******************************************
 %chk=DMA_geoopt_Freq.chk
 %mem=2000MB
 %nproc=2
 Will use up to    2 processors via shared memory.
 Default route: MaxDisk=200000000
 -------------------------------------------------------
 # opt=(tight,calcall) freq b3lyp geom=connectivity tzvp
 -------------------------------------------------------
 1/7=10,10=4,14=-1,18=20,26=3,38=1,57=2/1,3;
 2/9=110,17=6,18=5,40=1/2;
 3/5=19,7=101,11=2,16=1,25=1,30=1,74=-5/1,2,3;
 4//1;
 5/5=2,38=5/2;
 8/6=4,10=90,11=11/1;
 11/6=1,8=1,9=11,15=111,16=1/1,2,10;
 10/6=1/2;
 6/7=2,8=2,9=2,10=2,18=1,28=1/1;
 7/10=1,25=1/1,2,3,16;
 1/10=4,14=-1,18=20/3(3);
 2/9=110/2;
 7/8=1,9=1,25=1,44=-1/16;
 99//99;
 2/9=110/2;
 3/5=19,7=101,11=2,16=1,25=1,30=1,74=-5/1,2,3;
 4/5=5,16=3/1;
 5/5=2,38=5/2;
 8/6=4,10=90,11=11/1;
 11/6=1,8=1,9=11,15=111,16=1/1,2,10;
 10/6=1/2;
 7/10=1,25=1/1,2,3,16;
 1/10=4,14=-1,18=20/3(-8);
 2/9=110/2;
 6/7=2,8=2,9=2,10=2,18=1,19=2,28=1/1;
 7/8=1,9=1,25=1,44=-1/16;
 99//99;
 -------------------
 Title Card Required
 -------------------
 Symbolic Z-matrix:
 Charge =  0 Multiplicity = 1
 C                    -1.63895   0.32067   0. 
 H                    -1.2823   -0.68814   0. 
 H                    -1.28228   0.82506   0.87365 
 H                    -2.70895   0.32068   0. 
 N                    -1.14895   1.01362  -1.20025 
 H                    -1.48376   1.95591  -1.20116 
 C                     0.32105   1.01593  -1.19891 
 H                     0.6793    0.00769  -1.19746 
 H                     0.67772   1.51993  -2.07279 
 H                     0.67613   1.52186  -0.32549 
 

 GradGradGradGradGradGradGradGradGradGradGradGradGradGradGradGradGradGrad
 Berny optimization.
 Initialization pass.
                           ----------------------------
                           !    Initial Parameters    !
                           ! (Angstroms and Degrees)  !
 --------------------------                            --------------------------
 ! Name  Definition              Value          Derivative Info.                !
 --------------------------------------------------------------------------------
 ! R1    R(1,2)                  1.07           calculate D2E/DX2 analytically  !
 ! R2    R(1,3)                  1.07           calculate D2E/DX2 analytically  !
 ! R3    R(1,4)                  1.07           calculate D2E/DX2 analytically  !
 ! R4    R(1,5)                  1.47           calculate D2E/DX2 analytically  !
 ! R5    R(5,6)                  1.0            calculate D2E/DX2 analytically  !
 ! R6    R(5,7)                  1.47           calculate D2E/DX2 analytically  !
 ! R7    R(7,8)                  1.07           calculate D2E/DX2 analytically  !
 ! R8    R(7,9)                  1.07           calculate D2E/DX2 analytically  !
 ! R9    R(7,10)                 1.07           calculate D2E/DX2 analytically  !
 ! A1    A(2,1,3)              109.4712         calculate D2E/DX2 analytically  !
 ! A2    A(2,1,4)              109.4712         calculate D2E/DX2 analytically  !
 ! A3    A(2,1,5)              109.4712         calculate D2E/DX2 analytically  !
 ! A4    A(3,1,4)              109.4712         calculate D2E/DX2 analytically  !
 ! A5    A(3,1,5)              109.4713         calculate D2E/DX2 analytically  !
 ! A6    A(4,1,5)              109.4712         calculate D2E/DX2 analytically  !
 ! A7    A(1,5,6)              109.4712         calculate D2E/DX2 analytically  !
 ! A8    A(1,5,7)              109.4712         calculate D2E/DX2 analytically  !
 ! A9    A(6,5,7)              109.4713         calculate D2E/DX2 analytically  !
 ! A10   A(5,7,8)              109.4712         calculate D2E/DX2 analytically  !
 ! A11   A(5,7,9)              109.4712         calculate D2E/DX2 analytically  !
 ! A12   A(5,7,10)             109.4712         calculate D2E/DX2 analytically  !
 ! A13   A(8,7,9)              109.4713         calculate D2E/DX2 analytically  !
 ! A14   A(8,7,10)             109.4712         calculate D2E/DX2 analytically  !
 ! A15   A(9,7,10)             109.4712         calculate D2E/DX2 analytically  !
 ! D1    D(2,1,5,6)            179.8889         calculate D2E/DX2 analytically  !
 ! D2    D(2,1,5,7)            -60.1111         calculate D2E/DX2 analytically  !
 ! D3    D(3,1,5,6)            -60.1111         calculate D2E/DX2 analytically  !
 ! D4    D(3,1,5,7)             59.8889         calculate D2E/DX2 analytically  !
 ! D5    D(4,1,5,6)             59.8889         calculate D2E/DX2 analytically  !
 ! D6    D(4,1,5,7)            179.8889         calculate D2E/DX2 analytically  !
 ! D7    D(1,5,7,8)             59.9737         calculate D2E/DX2 analytically  !
 ! D8    D(1,5,7,9)            179.9737         calculate D2E/DX2 analytically  !
 ! D9    D(1,5,7,10)           -60.0263         calculate D2E/DX2 analytically  !
 ! D10   D(6,5,7,8)            179.9737         calculate D2E/DX2 analytically  !
 ! D11   D(6,5,7,9)            -60.0263         calculate D2E/DX2 analytically  !
 ! D12   D(6,5,7,10)            59.9737         calculate D2E/DX2 analytically  !
 --------------------------------------------------------------------------------
 Trust Radius=3.00D-01 FncErr=1.00D-07 GrdErr=1.00D-06
 Number of steps in this run=  46 maximum allowed number of steps= 100.
 GradGradGradGradGradGradGradGradGradGradGradGradGradGradGradGradGradGrad

                          Input orientation:                          
 ---------------------------------------------------------------------
 Center     Atomic     Atomic              Coordinates (Angstroms)
 Number     Number      Type              X           Y           Z
 ---------------------------------------------------------------------
    1          6             0       -1.638955    0.320665    0.000000
    2          1             0       -1.282300   -0.688145    0.000000
    3          1             0       -1.282282    0.825063    0.873652
    4          1             0       -2.708955    0.320678    0.000000
    5          7             0       -1.148946    1.013623   -1.200250
    6          1             0       -1.483760    1.955907   -1.201165
    7          6             0        0.321051    1.015933   -1.198907
    8          1             0        0.679301    0.007689   -1.197465
    9          1             0        0.677725    1.519930   -2.072789
   10          1             0        0.676126    1.521860   -0.325489
 ---------------------------------------------------------------------
                    Distance matrix (angstroms):
                    1          2          3          4          5
     1  C    0.000000
     2  H    1.070000   0.000000
     3  H    1.070000   1.747302   0.000000
     4  H    1.070000   1.747303   1.747303   0.000000
     5  N    1.470000   2.086720   2.086720   2.086720   0.000000
     6  H    2.034920   2.911081   2.371553   2.370205   1.000000
     7  C    2.400500   2.629067   2.627281   3.331920   1.470000
     8  H    2.627962   2.401247   2.967395   3.607237   2.086720
     9  H    3.331921   3.607458   3.606381   4.147802   2.086720
    10  H    2.628385   2.970774   2.399755   3.606598   2.086720
                    6          7          8          9         10
     6  H    0.000000
     7  C    2.034921   0.000000
     8  H    2.911082   1.070000   0.000000
     9  H    2.371038   1.070000   1.747303   0.000000
    10  H    2.370720   1.070000   1.747303   1.747303   0.000000
 Stoichiometry    C2H7N
 Framework group  C1[X(C2H7N)]
 Deg. of freedom    24
 Full point group                 C1
 Largest Abelian subgroup         C1      NOp   1
 Largest concise Abelian subgroup C1      NOp   1
                         Standard orientation:                         
 ---------------------------------------------------------------------
 Center     Atomic     Atomic              Coordinates (Angstroms)
 Number     Number      Type              X           Y           Z
 ---------------------------------------------------------------------
    1          6             0       -1.200250   -0.237085    0.019765
    2          1             0       -1.201228   -1.026279   -0.702780
    3          1             0       -1.199273   -0.655243    1.004672
    4          1             0       -2.073900    0.366800   -0.110461
    5          7             0        0.000000    0.591978   -0.161769
    6          1             0        0.000000    1.330612    0.512339
    7          6             0        1.200250   -0.237085    0.019765
    8          1             0        1.200018   -1.027692   -0.701234
    9          1             0        2.073901    0.366284   -0.112824
   10          1             0        1.200481   -0.653313    1.005490
 ---------------------------------------------------------------------
 Rotational constants (GHZ):     33.8255928      9.5960095      8.3702730
 Standard basis: TZVP (5D, 7F)
 There are    99 symmetry adapted basis functions of A   symmetry.
 Integral buffers will be    131072 words long.
 Raffenetti 2 integral format.
 Two-electron integral symmetry is turned on.
    99 basis functions,   161 primitive gaussians,   102 cartesian basis functions
    13 alpha electrons       13 beta electrons
       nuclear repulsion energy        84.7779604202 Hartrees.
 NAtoms=   10 NActive=   10 NUniq=   10 SFac= 7.50D-01 NAtFMM=   80 NAOKFM=F Big=F
 One-electron integrals computed using PRISM.
 NBasis=    99 RedAO= T  NBF=    99
 NBsUse=    99 1.00D-06 NBFU=    99
 Harris functional with IExCor=  402 diagonalized for initial guess.
 ExpMin= 9.52D-02 ExpMax= 1.97D+04 ExpMxC= 6.73D+02 IAcc=2 IRadAn=         4 AccDes= 0.00D+00
 HarFok:  IExCor= 402 AccDes= 0.00D+00 IRadAn=         4 IDoV=1
 ScaDFX=  1.000000  1.000000  1.000000  1.000000
 Initial guess orbital symmetries:
       Occupied  (A) (A) (A) (A) (A) (A) (A) (A) (A) (A) (A) (A)
                 (A)
       Virtual   (A) (A) (A) (A) (A) (A) (A) (A) (A) (A) (A) (A)
                 (A) (A) (A) (A) (A) (A) (A) (A) (A) (A) (A) (A)
                 (A) (A) (A) (A) (A) (A) (A) (A) (A) (A) (A) (A)
                 (A) (A) (A) (A) (A) (A) (A) (A) (A) (A) (A) (A)
                 (A) (A) (A) (A) (A) (A) (A) (A) (A) (A) (A) (A)
                 (A) (A) (A) (A) (A) (A) (A) (A) (A) (A) (A) (A)
                 (A) (A) (A) (A) (A) (A) (A) (A) (A) (A) (A) (A)
                 (A) (A)
 The electronic state of the initial guess is 1-A.
 Requested convergence on RMS density matrix=1.00D-08 within 128 cycles.
 Requested convergence on MAX density matrix=1.00D-06.
 Requested convergence on             energy=1.00D-06.
 No special actions if energy rises.
 Keep R1 integrals in memory in canonical form, NReq=    15680975.
 Integral accuracy reduced to 1.0D-05 until final iterations.
 Initial convergence to 1.0D-05 achieved.  Increase integral accuracy.
 SCF Done:  E(RB+HF-LYP) =  -135.212063287     A.U. after   12 cycles
             Convg  =    0.6957D-08             -V/T =  2.0039
             S**2   =   0.0000
 Range of M.O.s used for correlation:     1    99
 NBasis=    99 NAE=    13 NBE=    13 NFC=     0 NFV=     0
 NROrb=     99 NOA=    13 NOB=    13 NVA=    86 NVB=    86

 **** Warning!!: The largest alpha MO coefficient is  0.12135684D+02

 Symmetrizing basis deriv contribution to polar:
 IMax=3 JMax=2 DiffMx= 0.00D+00
 G2DrvN: will do   11 centers at a time, making    1 passes doing MaxLOS=2.
 FoFDir/FoFCou used for L=0 through L=2.
 DoAtom=TTTTTTTTTT
          Differentiating once with respect to electric field.
                with respect to dipole field.
          Differentiating once with respect to nuclear coordinates.
          Store integrals in memory, NReq=    14622643.
          There are  33 degrees of freedom in the 1st order CPHF.
    30 vectors were produced by pass  0.
 AX will form  30 AO Fock derivatives at one time.
    30 vectors were produced by pass  1.
    30 vectors were produced by pass  2.
    30 vectors were produced by pass  3.
    30 vectors were produced by pass  4.
    11 vectors were produced by pass  5.
     3 vectors were produced by pass  6.
 Inv2:  IOpt= 1 Iter= 1 AM= 2.46D-15 Conv= 1.00D-12.
 Inverted reduced A of dimension  164 with in-core refinement.
 Isotropic polarizability for W=    0.000000       33.40 Bohr**3.
 End of Minotr Frequency-dependent properties file   721 does not exist.

 **********************************************************************

            Population analysis using the SCF density.

 **********************************************************************

 Orbital symmetries:
       Occupied  (A) (A) (A) (A) (A) (A) (A) (A) (A) (A) (A) (A)
                 (A)
       Virtual   (A) (A) (A) (A) (A) (A) (A) (A) (A) (A) (A) (A)
                 (A) (A) (A) (A) (A) (A) (A) (A) (A) (A) (A) (A)
                 (A) (A) (A) (A) (A) (A) (A) (A) (A) (A) (A) (A)
                 (A) (A) (A) (A) (A) (A) (A) (A) (A) (A) (A) (A)
                 (A) (A) (A) (A) (A) (A) (A) (A) (A) (A) (A) (A)
                 (A) (A) (A) (A) (A) (A) (A) (A) (A) (A) (A) (A)
                 (A) (A) (A) (A) (A) (A) (A) (A) (A) (A) (A) (A)
                 (A) (A)
 The electronic state is 1-A.
 Alpha  occ. eigenvalues --  -14.29385 -10.17757 -10.17756  -0.89800  -0.70364
 Alpha  occ. eigenvalues --   -0.63640  -0.49088  -0.45144  -0.43245  -0.39676
 Alpha  occ. eigenvalues --   -0.37656  -0.36552  -0.22256
 Alpha virt. eigenvalues --    0.03325   0.07281   0.08470   0.10225   0.10879
 Alpha virt. eigenvalues --    0.13658   0.13866   0.15974   0.18229   0.21800
 Alpha virt. eigenvalues --    0.22008   0.24400   0.29380   0.33173   0.33495
 Alpha virt. eigenvalues --    0.36962   0.38963   0.44594   0.44958   0.47862
 Alpha virt. eigenvalues --    0.48691   0.49346   0.49605   0.52740   0.54586
 Alpha virt. eigenvalues --    0.57541   0.60406   0.63601   1.13869   1.15569
 Alpha virt. eigenvalues --    1.24018   1.25699   1.25876   1.29172   1.31730
 Alpha virt. eigenvalues --    1.34932   1.37978   1.39573   1.50014   1.50204
 Alpha virt. eigenvalues --    1.54160   1.54834   1.58879   1.61219   1.71910
 Alpha virt. eigenvalues --    1.75641   1.79330   1.79356   1.81149   1.82696
 Alpha virt. eigenvalues --    1.87115   1.96522   1.97212   2.01299   2.03618
 Alpha virt. eigenvalues --    2.11114   2.17370   2.24976   2.28819   2.33352
 Alpha virt. eigenvalues --    2.35375   2.40075   2.43714   2.45851   2.48442
 Alpha virt. eigenvalues --    2.57033   2.61938   2.65431   2.67632   2.74362
 Alpha virt. eigenvalues --    2.77781   2.86103   2.92070   2.95011   3.10189
 Alpha virt. eigenvalues --    3.13819   3.27089   3.34492   3.36530   3.37550
 Alpha virt. eigenvalues --    3.39498   3.75044   3.88571  21.95914  22.04289
 Alpha virt. eigenvalues --   31.80346
          Condensed to atoms (all electrons):
              1          2          3          4          5          6
     1  C    4.934934   0.403078   0.423506   0.393562   0.300141  -0.053137
     2  H    0.403078   0.582718  -0.059130  -0.015754  -0.037261   0.009995
     3  H    0.423506  -0.059130   0.664086  -0.040017  -0.086127  -0.009913
     4  H    0.393562  -0.015754  -0.040017   0.556562  -0.032776  -0.004266
     5  N    0.300141  -0.037261  -0.086127  -0.032776   6.649467   0.382378
     6  H   -0.053137   0.009995  -0.009913  -0.004266   0.382378   0.539827
     7  C   -0.122893  -0.009384  -0.003970   0.014109   0.300096  -0.053156
     8  H   -0.009330   0.009769  -0.004948   0.000215  -0.037265   0.010001
     9  H    0.014110   0.000212  -0.000888  -0.000556  -0.032810  -0.004243
    10  H   -0.004040  -0.004919   0.024302  -0.000888  -0.086047  -0.009941
              7          8          9         10
     1  C   -0.122893  -0.009330   0.014110  -0.004040
     2  H   -0.009384   0.009769   0.000212  -0.004919
     3  H   -0.003970  -0.004948  -0.000888   0.024302
     4  H    0.014109   0.000215  -0.000556  -0.000888
     5  N    0.300096  -0.037265  -0.032810  -0.086047
     6  H   -0.053156   0.010001  -0.004243  -0.009941
     7  C    4.934985   0.403046   0.393545   0.423590
     8  H    0.403046   0.582765  -0.015774  -0.059070
     9  H    0.393545  -0.015774   0.556542  -0.040017
    10  H    0.423590  -0.059070  -0.040017   0.663842
 Mulliken atomic charges:
              1
     1  C   -0.279930
     2  H    0.120674
     3  H    0.093099
     4  H    0.129808
     5  N   -0.319797
     6  H    0.192455
     7  C   -0.279968
     8  H    0.120591
     9  H    0.129879
    10  H    0.093188
 Sum of Mulliken charges=   0.00000
 Atomic charges with hydrogens summed into heavy atoms:
              1
     1  C    0.063651
     2  H    0.000000
     3  H    0.000000
     4  H    0.000000
     5  N   -0.127341
     6  H    0.000000
     7  C    0.063690
     8  H    0.000000
     9  H    0.000000
    10  H    0.000000
 Sum of Mulliken charges=   0.00000
 APT atomic charges:
              1
     1  C    0.315168
     2  H   -0.014123
     3  H   -0.085566
     4  H   -0.019125
     5  N   -0.510803
     6  H    0.118113
     7  C    0.315088
     8  H   -0.014041
     9  H   -0.019155
    10  H   -0.085555
 Sum of APT charges=   0.00000
 APT Atomic charges with hydrogens summed into heavy atoms:
              1
     1  C    0.196353
     2  H    0.000000
     3  H    0.000000
     4  H    0.000000
     5  N   -0.392690
     6  H    0.000000
     7  C    0.196337
     8  H    0.000000
     9  H    0.000000
    10  H    0.000000
 Sum of APT charges=   0.00000
 Electronic spatial extent (au):  <R**2>=   200.9921
 Charge=     0.0000 electrons
 Dipole moment (field-independent basis, Debye):
    X=     0.0000    Y=    -0.3554    Z=     1.1359  Tot=     1.1902
 Quadrupole moment (field-independent basis, Debye-Ang):
   XX=   -19.8555   YY=   -20.7578   ZZ=   -21.9154
   XY=    -0.0004   XZ=    -0.0004   YZ=     2.3681
 Traceless Quadrupole moment (field-independent basis, Debye-Ang):
   XX=     0.9874   YY=     0.0851   ZZ=    -1.0725
   XY=    -0.0004   XZ=    -0.0004   YZ=     2.3681
 Octapole moment (field-independent basis, Debye-Ang**2):
  XXX=    -0.0015  YYY=     2.6423  ZZZ=     1.2533  XYY=     0.0002
  XXY=     1.9702  XXZ=    -0.9831  XZZ=     0.0005  YZZ=    -0.7274
  YYZ=     1.5939  XYZ=    -0.0018
 Hexadecapole moment (field-independent basis, Debye-Ang**3):
 XXXX=  -175.1008 YYYY=   -58.3675 ZZZZ=   -40.3484 XXXY=    -0.0020
 XXXZ=    -0.0077 YYYX=    -0.0027 YYYZ=     5.5638 ZZZX=     0.0042
 ZZZY=     2.8617 XXYY=   -39.0105 XXZZ=   -37.6255 YYZZ=   -16.5152
 XXYZ=     0.6631 YYXZ=    -0.0015 ZZXY=     0.0021
 N-N= 8.477796042023D+01 E-N=-4.835183101420D+02  KE= 1.346932511409D+02
  Exact polarizability:  37.296   0.001  32.075   0.001   0.008  30.826
 Approx polarizability:  43.746   0.002  42.946   0.001   0.368  41.244
 ***** Axes restored to original set *****
 -------------------------------------------------------------------
 Center     Atomic                   Forces (Hartrees/Bohr)
 Number     Number              X              Y              Z
 -------------------------------------------------------------------
    1          6           0.003089852    0.017025532   -0.020691780
    2          1           0.003524460   -0.013669512    0.000111374
    3          1           0.004335223    0.003845239    0.021908422
    4          1          -0.014275077   -0.001700053    0.001179221
    5          7           0.006953731   -0.022899009   -0.001882328
    6          1          -0.004181970    0.010515951   -0.000742826
    7          6          -0.025954889    0.006725444   -0.002939106
    8          1           0.005378046   -0.013010533   -0.001000441
    9          1           0.006528364    0.005656420   -0.011555206
   10          1           0.014602259    0.007510522    0.015612670
 -------------------------------------------------------------------
 Cartesian Forces:  Max     0.025954889 RMS     0.011549332

 GradGradGradGradGradGradGradGradGradGradGradGradGradGradGradGradGradGrad
 Berny optimization.
 Internal  Forces:  Max     0.021146440 RMS     0.008153232
 Search for a local minimum.
 Step number   1 out of a maximum of  46
 All quantities printed in internal units (Hartrees-Bohrs-Radians)
 Second derivative matrix not updated -- analytic derivatives used.
     Eigenvalues ---    0.00356   0.00370   0.02534   0.06247   0.06272
     Eigenvalues ---    0.06435   0.06459   0.09784   0.13009   0.13684
     Eigenvalues ---    0.16301   0.16558   0.17596   0.18351   0.25510
     Eigenvalues ---    0.33582   0.35321   0.37207   0.37437   0.37833
     Eigenvalues ---    0.38113   0.38960   0.39370   0.481341000.00000
     Eigenvalues --- 1000.000001000.000001000.000001000.000001000.00000
     Eigenvalues --- 1000.000001000.000001000.000001000.000001000.00000
     Eigenvalues --- 1000.00000
 RFO step:  Lambda=-8.35700776D-03.
 Linear search not attempted -- first point.
 Iteration  1 RMS(Cart)=  0.05318143 RMS(Int)=  0.00193810
 Iteration  2 RMS(Cart)=  0.00216448 RMS(Int)=  0.00039886
 Iteration  3 RMS(Cart)=  0.00000717 RMS(Int)=  0.00039882
 Iteration  4 RMS(Cart)=  0.00000000 RMS(Int)=  0.00039882
 Variable       Old X    -DE/DX   Delta X   Delta X   Delta X     New X
                                 (Linear)    (Quad)   (Total)
    R1        2.02201   0.01406   0.00000   0.03937   0.03937   2.06138
    R2        2.02201   0.02115   0.00000   0.05632   0.05632   2.07833
    R3        2.02201   0.01427   0.00000   0.03721   0.03721   2.05922
    R4        2.77790   0.00056   0.00000  -0.02390  -0.02390   2.75400
    R5        1.88973   0.01131   0.00000   0.02368   0.02368   1.91341
    R6        2.77790   0.00057   0.00000  -0.02391  -0.02391   2.75399
    R7        2.02201   0.01406   0.00000   0.03937   0.03937   2.06137
    R8        2.02201   0.01428   0.00000   0.03722   0.03722   2.05923
    R9        2.02201   0.02114   0.00000   0.05631   0.05631   2.07832
    A1        1.91063  -0.00444   0.00000  -0.03073  -0.03108   1.87955
    A2        1.91063  -0.00222   0.00000  -0.02883  -0.02891   1.88173
    A3        1.91063  -0.00188   0.00000  -0.00322  -0.00345   1.90718
    A4        1.91063  -0.00409   0.00000  -0.01706  -0.01802   1.89261
    A5        1.91063   0.01199   0.00000   0.07510   0.07440   1.98504
    A6        1.91063   0.00063   0.00000   0.00475   0.00417   1.91480
    A7        1.91063  -0.00339   0.00000  -0.00020  -0.00084   1.90979
    A8        1.91063   0.01160   0.00000   0.05634   0.05590   1.96653
    A9        1.91063  -0.00338   0.00000  -0.00015  -0.00079   1.90984
   A10        1.91063  -0.00189   0.00000  -0.00327  -0.00350   1.90713
   A11        1.91063   0.00064   0.00000   0.00479   0.00421   1.91484
   A12        1.91063   0.01199   0.00000   0.07511   0.07441   1.98505
   A13        1.91063  -0.00222   0.00000  -0.02884  -0.02892   1.88172
   A14        1.91063  -0.00444   0.00000  -0.03075  -0.03110   1.87954
   A15        1.91063  -0.00409   0.00000  -0.01704  -0.01800   1.89264
    D1        3.13965  -0.00231   0.00000  -0.06489  -0.06510   3.07455
    D2       -1.04914  -0.00143   0.00000  -0.03069  -0.03069  -1.07983
    D3       -1.04914  -0.00156   0.00000  -0.05852  -0.05886  -1.10799
    D4        1.04526  -0.00067   0.00000  -0.02432  -0.02444   1.02082
    D5        1.04526   0.00116   0.00000  -0.03052  -0.03029   1.01497
    D6        3.13965   0.00205   0.00000   0.00368   0.00412  -3.13941
    D7        1.04674   0.00143   0.00000   0.03150   0.03149   1.07823
    D8        3.14113  -0.00204   0.00000  -0.00290  -0.00334   3.13779
    D9       -1.04766   0.00068   0.00000   0.02516   0.02529  -1.02237
   D10        3.14113   0.00232   0.00000   0.06566   0.06588  -3.07617
   D11       -1.04766  -0.00116   0.00000   0.03127   0.03104  -1.01661
   D12        1.04674   0.00157   0.00000   0.05933   0.05968   1.10642
         Item               Value     Threshold  Converged?
 Maximum Force            0.021146     0.000015     NO 
 RMS     Force            0.008153     0.000010     NO 
 Maximum Displacement     0.180361     0.000060     NO 
 RMS     Displacement     0.054117     0.000040     NO 
 Predicted change in Energy=-4.400407D-03
 GradGradGradGradGradGradGradGradGradGradGradGradGradGradGradGradGradGrad

                          Input orientation:                          
 ---------------------------------------------------------------------
 Center     Atomic     Atomic              Coordinates (Angstroms)
 Number     Number      Type              X           Y           Z
 ---------------------------------------------------------------------
    1          6             0       -1.653645    0.331488    0.007711
    2          1             0       -1.316893   -0.706015    0.017875
    3          1             0       -1.334472    0.795715    0.952268
    4          1             0       -2.742875    0.328159   -0.023901
    5          7             0       -1.129523    0.995749   -1.178849
    6          1             0       -1.492032    1.940091   -1.223859
    7          6             0        0.327104    1.034024   -1.204004
    8          1             0        0.713764    0.014193   -1.222740
    9          1             0        0.666007    1.535745   -2.110017
   10          1             0        0.771569    1.544056   -0.336896
 ---------------------------------------------------------------------
                    Distance matrix (angstroms):
                    1          2          3          4          5
     1  C    0.000000
     2  H    1.090833   0.000000
     3  H    1.099802   1.768782   0.000000
     4  H    1.089693   1.762012   1.776263   0.000000
     5  N    1.457351   2.088841   2.150274   2.093439   0.000000
     6  H    2.032360   2.928217   2.463727   2.367030   1.012531
     7  C    2.425938   2.687647   2.732605   3.363875   1.457346
     8  H    2.686878   2.486240   3.088156   3.672076   2.088800
     9  H    3.363895   3.672234   3.731909   4.174999   2.093464
    10  H    2.733265   3.090364   2.580187   3.731981   2.150273
                    6          7          8          9         10
     6  H    0.000000
     7  C    2.032389   0.000000
     8  H    2.928245   1.090831   0.000000
     9  H    2.367678   1.089697   1.762005   0.000000
    10  H    2.463216   1.099799   1.768768   1.776279   0.000000
 Stoichiometry    C2H7N
 Framework group  C1[X(C2H7N)]
 Deg. of freedom    24
 Full point group                 C1
 Largest Abelian subgroup         C1      NOp   1
 Largest concise Abelian subgroup C1      NOp   1
                         Standard orientation:                         
 ---------------------------------------------------------------------
 Center     Atomic     Atomic              Coordinates (Angstroms)
 Number     Number      Type              X           Y           Z
 ---------------------------------------------------------------------
    1          6             0       -1.212965   -0.223654    0.020381
    2          1             0       -1.243536   -1.004940   -0.740261
    3          1             0       -1.289716   -0.711006    1.003317
    4          1             0       -2.087484    0.411415   -0.118667
    5          7             0        0.000004    0.566069   -0.149670
    6          1             0       -0.000028    1.330457    0.514356
    7          6             0        1.212973   -0.223643    0.020386
    8          1             0        1.242704   -1.005925   -0.739261
    9          1             0        2.087514    0.411048   -0.120273
   10          1             0        1.290470   -0.709743    1.003878
 ---------------------------------------------------------------------
 Rotational constants (GHZ):     34.6875034      9.3160017      8.2243205
 Standard basis: TZVP (5D, 7F)
 There are    99 symmetry adapted basis functions of A   symmetry.
 Integral buffers will be    131072 words long.
 Raffenetti 2 integral format.
 Two-electron integral symmetry is turned on.
    99 basis functions,   161 primitive gaussians,   102 cartesian basis functions
    13 alpha electrons       13 beta electrons
       nuclear repulsion energy        84.1568977836 Hartrees.
 NAtoms=   10 NActive=   10 NUniq=   10 SFac= 7.50D-01 NAtFMM=   80 NAOKFM=F Big=F
 One-electron integrals computed using PRISM.
 NBasis=    99 RedAO= T  NBF=    99
 NBsUse=    99 1.00D-06 NBFU=    99
 Initial guess read from the read-write file:
 Initial guess orbital symmetries:
       Occupied  (A) (A) (A) (A) (A) (A) (A) (A) (A) (A) (A) (A)
                 (A)
       Virtual   (A) (A) (A) (A) (A) (A) (A) (A) (A) (A) (A) (A)
                 (A) (A) (A) (A) (A) (A) (A) (A) (A) (A) (A) (A)
                 (A) (A) (A) (A) (A) (A) (A) (A) (A) (A) (A) (A)
                 (A) (A) (A) (A) (A) (A) (A) (A) (A) (A) (A) (A)
                 (A) (A) (A) (A) (A) (A) (A) (A) (A) (A) (A) (A)
                 (A) (A) (A) (A) (A) (A) (A) (A) (A) (A) (A) (A)
                 (A) (A) (A) (A) (A) (A) (A) (A) (A) (A) (A) (A)
                 (A) (A)
 Harris functional with IExCor=  402 diagonalized for initial guess.
 ExpMin= 9.52D-02 ExpMax= 1.97D+04 ExpMxC= 6.73D+02 IAcc=2 IRadAn=         4 AccDes= 0.00D+00
 HarFok:  IExCor= 402 AccDes= 0.00D+00 IRadAn=         4 IDoV=1
 ScaDFX=  1.000000  1.000000  1.000000  1.000000
 Requested convergence on RMS density matrix=1.00D-08 within 128 cycles.
 Requested convergence on MAX density matrix=1.00D-06.
 Requested convergence on             energy=1.00D-06.
 No special actions if energy rises.
 Keep R1 integrals in memory in canonical form, NReq=    15680975.
 Integral accuracy reduced to 1.0D-05 until final iterations.
 Initial convergence to 1.0D-05 achieved.  Increase integral accuracy.
 SCF Done:  E(RB+HF-LYP) =  -135.216613703     A.U. after   11 cycles
             Convg  =    0.6494D-08             -V/T =  2.0053
             S**2   =   0.0000
 Range of M.O.s used for correlation:     1    99
 NBasis=    99 NAE=    13 NBE=    13 NFC=     0 NFV=     0
 NROrb=     99 NOA=    13 NOB=    13 NVA=    86 NVB=    86

 **** Warning!!: The largest alpha MO coefficient is  0.12432562D+02

 Symmetrizing basis deriv contribution to polar:
 IMax=3 JMax=2 DiffMx= 0.00D+00
 G2DrvN: will do   11 centers at a time, making    1 passes doing MaxLOS=2.
 FoFDir/FoFCou used for L=0 through L=2.
 DoAtom=TTTTTTTTTT
          Differentiating once with respect to electric field.
                with respect to dipole field.
          Differentiating once with respect to nuclear coordinates.
          Store integrals in memory, NReq=    14622643.
          There are  33 degrees of freedom in the 1st order CPHF.
    30 vectors were produced by pass  0.
 AX will form  30 AO Fock derivatives at one time.
    30 vectors were produced by pass  1.
    30 vectors were produced by pass  2.
    30 vectors were produced by pass  3.
    30 vectors were produced by pass  4.
    12 vectors were produced by pass  5.
     3 vectors were produced by pass  6.
 Inv2:  IOpt= 1 Iter= 1 AM= 1.84D-15 Conv= 1.00D-12.
 Inverted reduced A of dimension  165 with in-core refinement.
 Isotropic polarizability for W=    0.000000       34.62 Bohr**3.
 End of Minotr Frequency-dependent properties file   721 does not exist.
 ***** Axes restored to original set *****
 -------------------------------------------------------------------
 Center     Atomic                   Forces (Hartrees/Bohr)
 Number     Number              X              Y              Z
 -------------------------------------------------------------------
    1          6          -0.000093707    0.001502530   -0.001787056
    2          1          -0.000111016   -0.001268910   -0.000014161
    3          1           0.000509944    0.000133633    0.002163700
    4          1          -0.001067106   -0.000147751    0.000219642
    5          7           0.000979927   -0.001262535    0.000884230
    6          1          -0.000843816    0.000334409   -0.001194717
    7          6          -0.002135960    0.000774450   -0.000543506
    8          1           0.000625712   -0.001007631   -0.000469020
    9          1           0.000604645    0.000449629   -0.000800529
   10          1           0.001531378    0.000492175    0.001541418
 -------------------------------------------------------------------
 Cartesian Forces:  Max     0.002163700 RMS     0.001034319

 GradGradGradGradGradGradGradGradGradGradGradGradGradGradGradGradGradGrad
 Berny optimization.
 Internal  Forces:  Max     0.002062259 RMS     0.000788918
 Search for a local minimum.
 Step number   2 out of a maximum of  46
 All quantities printed in internal units (Hartrees-Bohrs-Radians)
 Second derivative matrix not updated -- analytic derivatives used.
 Trust test= 1.03D+00 RLast= 2.30D-01 DXMaxT set to 4.24D-01
     Eigenvalues ---    0.00365   0.00383   0.02154   0.06186   0.06201
     Eigenvalues ---    0.06266   0.06296   0.10322   0.12580   0.13284
     Eigenvalues ---    0.15555   0.16428   0.16856   0.17968   0.24108
     Eigenvalues ---    0.30842   0.31023   0.33307   0.33646   0.33679
     Eigenvalues ---    0.33845   0.36032   0.36998   0.443941000.00000
     Eigenvalues --- 1000.000001000.000001000.000001000.000001000.00000
     Eigenvalues --- 1000.000001000.000001000.000001000.000001000.00000
     Eigenvalues --- 1000.00000
 RFO step:  Lambda=-2.98355918D-04.
 Quintic linear search produced a step of  0.12806.
 Iteration  1 RMS(Cart)=  0.03996023 RMS(Int)=  0.00092624
 Iteration  2 RMS(Cart)=  0.00104173 RMS(Int)=  0.00010751
 Iteration  3 RMS(Cart)=  0.00000047 RMS(Int)=  0.00010751
 Variable       Old X    -DE/DX   Delta X   Delta X   Delta X     New X
                                 (Linear)    (Quad)   (Total)
    R1        2.06138   0.00117   0.00504  -0.00063   0.00441   2.06579
    R2        2.07833   0.00206   0.00721  -0.00058   0.00664   2.08496
    R3        2.05922   0.00106   0.00477  -0.00201   0.00276   2.06198
    R4        2.75400   0.00065  -0.00306  -0.00156  -0.00462   2.74937
    R5        1.91341   0.00067   0.00303  -0.00280   0.00023   1.91364
    R6        2.75399   0.00065  -0.00306  -0.00156  -0.00462   2.74936
    R7        2.06137   0.00117   0.00504  -0.00062   0.00442   2.06579
    R8        2.05923   0.00106   0.00477  -0.00202   0.00275   2.06198
    R9        2.07832   0.00206   0.00721  -0.00056   0.00665   2.08497
    A1        1.87955  -0.00048  -0.00398   0.00052  -0.00351   1.87604
    A2        1.88173  -0.00043  -0.00370  -0.00177  -0.00548   1.87624
    A3        1.90718   0.00000  -0.00044   0.00324   0.00277   1.90995
    A4        1.89261  -0.00042  -0.00231   0.00094  -0.00149   1.89112
    A5        1.98504   0.00109   0.00953  -0.00304   0.00639   1.99143
    A6        1.91480   0.00015   0.00053   0.00011   0.00057   1.91537
    A7        1.90979  -0.00025  -0.00011   0.01130   0.01085   1.92063
    A8        1.96653   0.00141   0.00716   0.00499   0.01191   1.97844
    A9        1.90984  -0.00025  -0.00010   0.01123   0.01078   1.92062
   A10        1.90713   0.00000  -0.00045   0.00329   0.00281   1.90994
   A11        1.91484   0.00015   0.00054   0.00006   0.00052   1.91536
   A12        1.98505   0.00109   0.00953  -0.00304   0.00639   1.99144
   A13        1.88172  -0.00043  -0.00370  -0.00176  -0.00547   1.87624
   A14        1.87954  -0.00048  -0.00398   0.00054  -0.00349   1.87604
   A15        1.89264  -0.00042  -0.00230   0.00092  -0.00151   1.89112
    D1        3.07455  -0.00067  -0.00834  -0.08685  -0.09526   2.97929
    D2       -1.07983  -0.00021  -0.00393  -0.06108  -0.06497  -1.14479
    D3       -1.10799  -0.00057  -0.00754  -0.08588  -0.09350  -1.20149
    D4        1.02082  -0.00010  -0.00313  -0.06011  -0.06321   0.95761
    D5        1.01497  -0.00024  -0.00388  -0.08668  -0.09057   0.92440
    D6       -3.13941   0.00022   0.00053  -0.06091  -0.06028   3.08350
    D7        1.07823   0.00022   0.00403   0.06276   0.06676   1.14499
    D8        3.13779  -0.00021  -0.00043   0.06261   0.06208  -3.08332
    D9       -1.02237   0.00011   0.00324   0.06173   0.06495  -0.95742
   D10       -3.07617   0.00068   0.00844   0.08857   0.09708  -2.97909
   D11       -1.01661   0.00025   0.00398   0.08842   0.09241  -0.92421
   D12        1.10642   0.00057   0.00764   0.08755   0.09527   1.20169
         Item               Value     Threshold  Converged?
 Maximum Force            0.002062     0.000015     NO 
 RMS     Force            0.000789     0.000010     NO 
 Maximum Displacement     0.109459     0.000060     NO 
 RMS     Displacement     0.040003     0.000040     NO 
 Predicted change in Energy=-1.759526D-04
 GradGradGradGradGradGradGradGradGradGradGradGradGradGradGradGradGradGrad

                          Input orientation:                          
 ---------------------------------------------------------------------
 Center     Atomic     Atomic              Coordinates (Angstroms)
 Number     Number      Type              X           Y           Z
 ---------------------------------------------------------------------
    1          6             0       -1.653838    0.334572    0.014723
    2          1             0       -1.358290   -0.717804    0.027851
    3          1             0       -1.307833    0.787951    0.959197
    4          1             0       -2.744294    0.368952   -0.003652
    5          7             0       -1.121841    0.971863   -1.180095
    6          1             0       -1.513197    1.900285   -1.281782
    7          6             0        0.331402    1.038390   -1.199901
    8          1             0        0.741038    0.026472   -1.256782
    9          1             0        0.663611    1.577307   -2.088618
   10          1             0        0.772246    1.525218   -0.313354
 ---------------------------------------------------------------------
                    Distance matrix (angstroms):
                    1          2          3          4          5
     1  C    0.000000
     2  H    1.093168   0.000000
     3  H    1.103314   1.771228   0.000000
     4  H    1.091153   1.761544   1.779342   0.000000
     5  N    1.454906   2.090459   2.155223   2.092814   0.000000
     6  H    2.037686   2.931472   2.510269   2.343970   1.012653
     7  C    2.431429   2.728855   2.722409   3.367352   1.454900
     8  H    2.728934   2.571266   3.112601   3.719565   2.090446
     9  H    3.367343   3.719551   3.714680   4.173849   2.092801
    10  H    2.722343   3.112355   2.547484   3.714689   2.155228
                    6          7          8          9         10
     6  H    0.000000
     7  C    2.037673   0.000000
     8  H    2.931446   1.093168   0.000000
     9  H    2.343883   1.091152   1.761544   0.000000
    10  H    2.510334   1.103318   1.771234   1.779347   0.000000
 Stoichiometry    C2H7N
 Framework group  C1[X(C2H7N)]
 Deg. of freedom    24
 Full point group                 C1
 Largest Abelian subgroup         C1      NOp   1
 Largest concise Abelian subgroup C1      NOp   1
                         Standard orientation:                         
 ---------------------------------------------------------------------
 Center     Atomic     Atomic              Coordinates (Angstroms)
 Number     Number      Type              X           Y           Z
 ---------------------------------------------------------------------
    1          6             0       -1.215716   -0.222123    0.020243
    2          1             0       -1.285592   -0.960143   -0.783163
    3          1             0       -1.273783   -0.767590    0.977528
    4          1             0       -2.086931    0.430302   -0.056833
    5          7             0        0.000003    0.559805   -0.145181
    6          1             0        0.000012    1.341730    0.498294
    7          6             0        1.215713   -0.222127    0.020244
    8          1             0        1.285674   -0.960014   -0.783277
    9          1             0        2.086918    0.430330   -0.056649
   10          1             0        1.273701   -0.767749    0.977450
 ---------------------------------------------------------------------
 Rotational constants (GHZ):     34.8960070      9.2708929      8.1944825
 Standard basis: TZVP (5D, 7F)
 There are    99 symmetry adapted basis functions of A   symmetry.
 Integral buffers will be    131072 words long.
 Raffenetti 2 integral format.
 Two-electron integral symmetry is turned on.
    99 basis functions,   161 primitive gaussians,   102 cartesian basis functions
    13 alpha electrons       13 beta electrons
       nuclear repulsion energy        84.0897514575 Hartrees.
 NAtoms=   10 NActive=   10 NUniq=   10 SFac= 7.50D-01 NAtFMM=   80 NAOKFM=F Big=F
 One-electron integrals computed using PRISM.
 NBasis=    99 RedAO= T  NBF=    99
 NBsUse=    99 1.00D-06 NBFU=    99
 Initial guess read from the read-write file:
 Initial guess orbital symmetries:
       Occupied  (A) (A) (A) (A) (A) (A) (A) (A) (A) (A) (A) (A)
                 (A)
       Virtual   (A) (A) (A) (A) (A) (A) (A) (A) (A) (A) (A) (A)
                 (A) (A) (A) (A) (A) (A) (A) (A) (A) (A) (A) (A)
                 (A) (A) (A) (A) (A) (A) (A) (A) (A) (A) (A) (A)
                 (A) (A) (A) (A) (A) (A) (A) (A) (A) (A) (A) (A)
                 (A) (A) (A) (A) (A) (A) (A) (A) (A) (A) (A) (A)
                 (A) (A) (A) (A) (A) (A) (A) (A) (A) (A) (A) (A)
                 (A) (A) (A) (A) (A) (A) (A) (A) (A) (A) (A) (A)
                 (A) (A)
 Harris functional with IExCor=  402 diagonalized for initial guess.
 ExpMin= 9.52D-02 ExpMax= 1.97D+04 ExpMxC= 6.73D+02 IAcc=2 IRadAn=         4 AccDes= 0.00D+00
 HarFok:  IExCor= 402 AccDes= 0.00D+00 IRadAn=         4 IDoV=1
 ScaDFX=  1.000000  1.000000  1.000000  1.000000
 Requested convergence on RMS density matrix=1.00D-08 within 128 cycles.
 Requested convergence on MAX density matrix=1.00D-06.
 Requested convergence on             energy=1.00D-06.
 No special actions if energy rises.
 Keep R1 integrals in memory in canonical form, NReq=    15680975.
 Integral accuracy reduced to 1.0D-05 until final iterations.
 Initial convergence to 1.0D-05 achieved.  Increase integral accuracy.
 SCF Done:  E(RB+HF-LYP) =  -135.216784628     A.U. after   10 cycles
             Convg  =    0.5857D-08             -V/T =  2.0055
             S**2   =   0.0000
 Range of M.O.s used for correlation:     1    99
 NBasis=    99 NAE=    13 NBE=    13 NFC=     0 NFV=     0
 NROrb=     99 NOA=    13 NOB=    13 NVA=    86 NVB=    86

 **** Warning!!: The largest alpha MO coefficient is  0.12481770D+02

 Symmetrizing basis deriv contribution to polar:
 IMax=3 JMax=2 DiffMx= 0.00D+00
 G2DrvN: will do   11 centers at a time, making    1 passes doing MaxLOS=2.
 FoFDir/FoFCou used for L=0 through L=2.
 DoAtom=TTTTTTTTTT
          Differentiating once with respect to electric field.
                with respect to dipole field.
          Differentiating once with respect to nuclear coordinates.
          Store integrals in memory, NReq=    14622643.
          There are  33 degrees of freedom in the 1st order CPHF.
    30 vectors were produced by pass  0.
 AX will form  30 AO Fock derivatives at one time.
    30 vectors were produced by pass  1.
    30 vectors were produced by pass  2.
    30 vectors were produced by pass  3.
    30 vectors were produced by pass  4.
    11 vectors were produced by pass  5.
     3 vectors were produced by pass  6.
 Inv2:  IOpt= 1 Iter= 1 AM= 2.31D-15 Conv= 1.00D-12.
 Inverted reduced A of dimension  164 with in-core refinement.
 Isotropic polarizability for W=    0.000000       34.78 Bohr**3.
 End of Minotr Frequency-dependent properties file   721 does not exist.
 ***** Axes restored to original set *****
 -------------------------------------------------------------------
 Center     Atomic                   Forces (Hartrees/Bohr)
 Number     Number              X              Y              Z
 -------------------------------------------------------------------
    1          6          -0.000184682   -0.000253273   -0.000015827
    2          1           0.000014014   -0.000067599    0.000079943
    3          1          -0.000000407    0.000101494    0.000072348
    4          1          -0.000062380   -0.000008401    0.000031776
    5          7          -0.000120164    0.000298163   -0.000018971
    6          1           0.000026008   -0.000038181    0.000023429
    7          6           0.000171373   -0.000130049   -0.000231555
    8          1           0.000094608   -0.000039600    0.000032841
    9          1           0.000051779    0.000031545   -0.000037365
   10          1           0.000009852    0.000105900    0.000063383
 -------------------------------------------------------------------
 Cartesian Forces:  Max     0.000298163 RMS     0.000110823

 GradGradGradGradGradGradGradGradGradGradGradGradGradGradGradGradGradGrad
 Berny optimization.
 Internal  Forces:  Max     0.000326491 RMS     0.000106953
 Search for a local minimum.
 Step number   3 out of a maximum of  46
 All quantities printed in internal units (Hartrees-Bohrs-Radians)
 Second derivative matrix not updated -- analytic derivatives used.
 Trust test= 9.71D-01 RLast= 2.80D-01 DXMaxT set to 6.00D-01
     Eigenvalues ---    0.00350   0.00374   0.01949   0.06157   0.06163
     Eigenvalues ---    0.06253   0.06289   0.10483   0.12531   0.13231
     Eigenvalues ---    0.15335   0.16380   0.16772   0.17945   0.23846
     Eigenvalues ---    0.30244   0.30425   0.32872   0.33091   0.33512
     Eigenvalues ---    0.33631   0.36109   0.36922   0.443911000.00000
     Eigenvalues --- 1000.000001000.000001000.000001000.000001000.00000
     Eigenvalues --- 1000.000001000.000001000.000001000.000001000.00000
     Eigenvalues --- 1000.00000
 RFO step:  Lambda=-2.18390595D-06.
 Quintic linear search produced a step of -0.04344.
 Iteration  1 RMS(Cart)=  0.00324888 RMS(Int)=  0.00000567
 Iteration  2 RMS(Cart)=  0.00000754 RMS(Int)=  0.00000311
 Iteration  3 RMS(Cart)=  0.00000000 RMS(Int)=  0.00000311
 Variable       Old X    -DE/DX   Delta X   Delta X   Delta X     New X
                                 (Linear)    (Quad)   (Total)
    R1        2.06579   0.00007  -0.00019   0.00029   0.00010   2.06589
    R2        2.08496   0.00010  -0.00029   0.00062   0.00033   2.08529
    R3        2.06198   0.00006  -0.00012   0.00030   0.00018   2.06216
    R4        2.74937   0.00032   0.00020   0.00061   0.00081   2.75018
    R5        1.91364  -0.00004  -0.00001  -0.00011  -0.00012   1.91352
    R6        2.74936   0.00033   0.00020   0.00062   0.00082   2.75018
    R7        2.06579   0.00007  -0.00019   0.00029   0.00010   2.06589
    R8        2.06198   0.00006  -0.00012   0.00030   0.00018   2.06216
    R9        2.08497   0.00010  -0.00029   0.00061   0.00032   2.08529
    A1        1.87604  -0.00001   0.00015  -0.00010   0.00006   1.87610
    A2        1.87624  -0.00003   0.00024  -0.00006   0.00018   1.87642
    A3        1.90995   0.00011  -0.00012   0.00061   0.00049   1.91044
    A4        1.89112  -0.00003   0.00006  -0.00051  -0.00044   1.89068
    A5        1.99143  -0.00007  -0.00028   0.00006  -0.00021   1.99121
    A6        1.91537   0.00004  -0.00002  -0.00003  -0.00005   1.91532
    A7        1.92063  -0.00008  -0.00047   0.00028  -0.00018   1.92045
    A8        1.97844   0.00029  -0.00052   0.00173   0.00122   1.97966
    A9        1.92062  -0.00008  -0.00047   0.00029  -0.00017   1.92045
   A10        1.90994   0.00011  -0.00012   0.00062   0.00050   1.91044
   A11        1.91536   0.00004  -0.00002  -0.00002  -0.00004   1.91532
   A12        1.99144  -0.00008  -0.00028   0.00005  -0.00023   1.99121
   A13        1.87624  -0.00003   0.00024  -0.00006   0.00017   1.87642
   A14        1.87604  -0.00001   0.00015  -0.00010   0.00005   1.87610
   A15        1.89112  -0.00003   0.00007  -0.00051  -0.00045   1.89068
    D1        2.97929   0.00001   0.00414   0.00110   0.00524   2.98453
    D2       -1.14479   0.00006   0.00282   0.00295   0.00577  -1.13902
    D3       -1.20149   0.00002   0.00406   0.00147   0.00553  -1.19596
    D4        0.95761   0.00007   0.00275   0.00331   0.00606   0.96366
    D5        0.92440  -0.00004   0.00393   0.00083   0.00477   0.92916
    D6        3.08350   0.00001   0.00262   0.00268   0.00530   3.08879
    D7        1.14499  -0.00006  -0.00290  -0.00307  -0.00597   1.13902
    D8       -3.08332  -0.00001  -0.00270  -0.00278  -0.00548  -3.08880
    D9       -0.95742  -0.00007  -0.00282  -0.00343  -0.00625  -0.96367
   D10       -2.97909  -0.00001  -0.00422  -0.00123  -0.00544  -2.98453
   D11       -0.92421   0.00004  -0.00401  -0.00094  -0.00496  -0.92917
   D12        1.20169  -0.00002  -0.00414  -0.00159  -0.00573   1.19596
         Item               Value     Threshold  Converged?
 Maximum Force            0.000326     0.000015     NO 
 RMS     Force            0.000107     0.000010     NO 
 Maximum Displacement     0.007843     0.000060     NO 
 RMS     Displacement     0.003250     0.000040     NO 
 Predicted change in Energy=-1.372017D-06
 GradGradGradGradGradGradGradGradGradGradGradGradGradGradGradGradGradGrad

                          Input orientation:                          
 ---------------------------------------------------------------------
 Center     Atomic     Atomic              Coordinates (Angstroms)
 Number     Number      Type              X           Y           Z
 ---------------------------------------------------------------------
    1          6             0       -1.654659    0.333965    0.014718
    2          1             0       -1.356595   -0.717754    0.027990
    3          1             0       -1.311816    0.787836    0.960313
    4          1             0       -2.745249    0.365927   -0.005656
    5          7             0       -1.121780    0.973906   -1.178810
    6          1             0       -1.511704    1.903172   -1.277632
    7          6             0        0.331962    1.038301   -1.200737
    8          1             0        0.740600    0.025785   -1.255113
    9          1             0        0.663741    1.574547   -2.091346
   10          1             0        0.774504    1.527521   -0.316141
 ---------------------------------------------------------------------
                    Distance matrix (angstroms):
                    1          2          3          4          5
     1  C    0.000000
     2  H    1.093221   0.000000
     3  H    1.103490   1.771449   0.000000
     4  H    1.091248   1.761776   1.779278   0.000000
     5  N    1.455333   2.091223   2.155593   2.093222   0.000000
     6  H    2.037895   2.932227   2.508451   2.345778   1.012591
     7  C    2.433122   2.728502   2.726696   3.368906   1.455333
     8  H    2.728501   2.568546   3.114682   3.718600   2.091224
     9  H    3.368906   3.718600   3.719457   4.175174   2.093222
    10  H    2.726697   3.114686   2.555230   3.719457   2.155593
                    6          7          8          9         10
     6  H    0.000000
     7  C    2.037895   0.000000
     8  H    2.932228   1.093221   0.000000
     9  H    2.345780   1.091248   1.761776   0.000000
    10  H    2.508450   1.103490   1.771449   1.779278   0.000000
 Stoichiometry    C2H7N
 Framework group  C1[X(C2H7N)]
 Deg. of freedom    24
 Full point group                 C1
 Largest Abelian subgroup         C1      NOp   1
 Largest concise Abelian subgroup C1      NOp   1
                         Standard orientation:                         
 ---------------------------------------------------------------------
 Center     Atomic     Atomic              Coordinates (Angstroms)
 Number     Number      Type              X           Y           Z
 ---------------------------------------------------------------------
    1          6             0       -1.216561   -0.222015    0.020196
    2          1             0       -1.284274   -0.964241   -0.779584
    3          1             0       -1.277614   -0.762489    0.980326
    4          1             0       -2.087587    0.430137   -0.062468
    5          7             0        0.000000    0.559395   -0.145242
    6          1             0        0.000000    1.341600    0.497795
    7          6             0        1.216561   -0.222015    0.020196
    8          1             0        1.284273   -0.964243   -0.779582
    9          1             0        2.087587    0.430136   -0.062471
   10          1             0        1.277615   -0.762486    0.980327
 ---------------------------------------------------------------------
 Rotational constants (GHZ):     34.9134146      9.2592330      8.1865355
 Standard basis: TZVP (5D, 7F)
 There are    99 symmetry adapted basis functions of A   symmetry.
 Integral buffers will be    131072 words long.
 Raffenetti 2 integral format.
 Two-electron integral symmetry is turned on.
    99 basis functions,   161 primitive gaussians,   102 cartesian basis functions
    13 alpha electrons       13 beta electrons
       nuclear repulsion energy        84.0653916632 Hartrees.
 NAtoms=   10 NActive=   10 NUniq=   10 SFac= 7.50D-01 NAtFMM=   80 NAOKFM=F Big=F
 One-electron integrals computed using PRISM.
 NBasis=    99 RedAO= T  NBF=    99
 NBsUse=    99 1.00D-06 NBFU=    99
 Initial guess read from the read-write file:
 Initial guess orbital symmetries:
       Occupied  (A) (A) (A) (A) (A) (A) (A) (A) (A) (A) (A) (A)
                 (A)
       Virtual   (A) (A) (A) (A) (A) (A) (A) (A) (A) (A) (A) (A)
                 (A) (A) (A) (A) (A) (A) (A) (A) (A) (A) (A) (A)
                 (A) (A) (A) (A) (A) (A) (A) (A) (A) (A) (A) (A)
                 (A) (A) (A) (A) (A) (A) (A) (A) (A) (A) (A) (A)
                 (A) (A) (A) (A) (A) (A) (A) (A) (A) (A) (A) (A)
                 (A) (A) (A) (A) (A) (A) (A) (A) (A) (A) (A) (A)
                 (A) (A) (A) (A) (A) (A) (A) (A) (A) (A) (A) (A)
                 (A) (A)
 Requested convergence on RMS density matrix=1.00D-08 within 128 cycles.
 Requested convergence on MAX density matrix=1.00D-06.
 Requested convergence on             energy=1.00D-06.
 No special actions if energy rises.
 Keep R1 integrals in memory in canonical form, NReq=    15680975.
 SCF Done:  E(RB+HF-LYP) =  -135.216786568     A.U. after    7 cycles
             Convg  =    0.6641D-08             -V/T =  2.0055
             S**2   =   0.0000
 Range of M.O.s used for correlation:     1    99
 NBasis=    99 NAE=    13 NBE=    13 NFC=     0 NFV=     0
 NROrb=     99 NOA=    13 NOB=    13 NVA=    86 NVB=    86

 **** Warning!!: The largest alpha MO coefficient is  0.12467512D+02

 Symmetrizing basis deriv contribution to polar:
 IMax=3 JMax=2 DiffMx= 0.00D+00
 G2DrvN: will do   11 centers at a time, making    1 passes doing MaxLOS=2.
 FoFDir/FoFCou used for L=0 through L=2.
 DoAtom=TTTTTTTTTT
          Differentiating once with respect to electric field.
                with respect to dipole field.
          Differentiating once with respect to nuclear coordinates.
          Store integrals in memory, NReq=    14622643.
          There are  33 degrees of freedom in the 1st order CPHF.
    30 vectors were produced by pass  0.
 AX will form  30 AO Fock derivatives at one time.
    30 vectors were produced by pass  1.
    30 vectors were produced by pass  2.
    30 vectors were produced by pass  3.
    30 vectors were produced by pass  4.
    11 vectors were produced by pass  5.
     3 vectors were produced by pass  6.
 Inv2:  IOpt= 1 Iter= 1 AM= 3.00D-15 Conv= 1.00D-12.
 Inverted reduced A of dimension  164 with in-core refinement.
 Isotropic polarizability for W=    0.000000       34.79 Bohr**3.
 End of Minotr Frequency-dependent properties file   721 does not exist.
 ***** Axes restored to original set *****
 -------------------------------------------------------------------
 Center     Atomic                   Forces (Hartrees/Bohr)
 Number     Number              X              Y              Z
 -------------------------------------------------------------------
    1          6           0.000003348    0.000006433    0.000000150
    2          1           0.000006094    0.000002643    0.000006908
    3          1          -0.000003219    0.000008273   -0.000000292
    4          1           0.000000827   -0.000003818   -0.000002933
    5          7           0.000003690   -0.000016815   -0.000003834
    6          1          -0.000004971   -0.000005828   -0.000011614
    7          6          -0.000004120    0.000003886    0.000004643
    8          1           0.000002282    0.000001313    0.000009194
    9          1          -0.000000905   -0.000004412   -0.000001899
   10          1          -0.000003026    0.000008326   -0.000000322
 -------------------------------------------------------------------
 Cartesian Forces:  Max     0.000016815 RMS     0.000005772

 GradGradGradGradGradGradGradGradGradGradGradGradGradGradGradGradGradGrad
 Berny optimization.
 Internal  Forces:  Max     0.000008425 RMS     0.000002762
 Search for a local minimum.
 Step number   4 out of a maximum of  46
 All quantities printed in internal units (Hartrees-Bohrs-Radians)
 Second derivative matrix not updated -- analytic derivatives used.
 Trust test= 1.41D+00 RLast= 1.94D-02 DXMaxT set to 6.00D-01
     Eigenvalues ---    0.00350   0.00374   0.01936   0.06157   0.06165
     Eigenvalues ---    0.06252   0.06286   0.10479   0.12520   0.13218
     Eigenvalues ---    0.15313   0.16375   0.16765   0.17933   0.23791
     Eigenvalues ---    0.30209   0.30383   0.32863   0.33080   0.33482
     Eigenvalues ---    0.33605   0.36041   0.36834   0.444111000.00000
     Eigenvalues --- 1000.000001000.000001000.000001000.000001000.00000
     Eigenvalues --- 1000.000001000.000001000.000001000.000001000.00000
     Eigenvalues --- 1000.00000
 RFO step:  Lambda= 0.00000000D+00.
 Quintic linear search produced a step of -0.02395.
 Iteration  1 RMS(Cart)=  0.00007853 RMS(Int)=  0.00000000
 Iteration  2 RMS(Cart)=  0.00000000 RMS(Int)=  0.00000000
 Variable       Old X    -DE/DX   Delta X   Delta X   Delta X     New X
                                 (Linear)    (Quad)   (Total)
    R1        2.06589   0.00000   0.00000   0.00000   0.00000   2.06589
    R2        2.08529   0.00000  -0.00001   0.00001   0.00000   2.08530
    R3        2.06216   0.00000   0.00000   0.00000   0.00000   2.06216
    R4        2.75018  -0.00001  -0.00002   0.00000  -0.00001   2.75017
    R5        1.91352   0.00000   0.00000   0.00001   0.00001   1.91353
    R6        2.75018  -0.00001  -0.00002   0.00000  -0.00001   2.75017
    R7        2.06589   0.00000   0.00000   0.00000   0.00000   2.06589
    R8        2.06216   0.00000   0.00000   0.00000   0.00000   2.06216
    R9        2.08529   0.00000  -0.00001   0.00001   0.00000   2.08530
    A1        1.87610   0.00000   0.00000   0.00000   0.00000   1.87610
    A2        1.87642   0.00000   0.00000   0.00001   0.00001   1.87643
    A3        1.91044   0.00000  -0.00001  -0.00001  -0.00002   1.91042
    A4        1.89068   0.00000   0.00001   0.00000   0.00001   1.89069
    A5        1.99121   0.00000   0.00001   0.00000   0.00001   1.99122
    A6        1.91532   0.00000   0.00000   0.00000   0.00000   1.91532
    A7        1.92045   0.00000   0.00000   0.00000   0.00000   1.92045
    A8        1.97966  -0.00001  -0.00003  -0.00001  -0.00004   1.97962
    A9        1.92045   0.00000   0.00000   0.00000   0.00000   1.92045
   A10        1.91044   0.00000  -0.00001  -0.00001  -0.00002   1.91042
   A11        1.91532   0.00000   0.00000   0.00000   0.00000   1.91532
   A12        1.99121   0.00000   0.00001   0.00000   0.00001   1.99122
   A13        1.87642   0.00000   0.00000   0.00001   0.00001   1.87643
   A14        1.87610   0.00000   0.00000   0.00000   0.00000   1.87610
   A15        1.89068   0.00000   0.00001   0.00000   0.00001   1.89069
    D1        2.98453   0.00000  -0.00013   0.00002  -0.00011   2.98442
    D2       -1.13902   0.00000  -0.00014   0.00000  -0.00014  -1.13916
    D3       -1.19596   0.00000  -0.00013   0.00001  -0.00012  -1.19609
    D4        0.96366   0.00000  -0.00015  -0.00001  -0.00015   0.96351
    D5        0.92916   0.00000  -0.00011   0.00001  -0.00010   0.92906
    D6        3.08879   0.00000  -0.00013   0.00000  -0.00013   3.08866
    D7        1.13902   0.00000   0.00014   0.00000   0.00014   1.13916
    D8       -3.08880   0.00000   0.00013   0.00000   0.00013  -3.08866
    D9       -0.96367   0.00000   0.00015   0.00000   0.00015  -0.96352
   D10       -2.98453   0.00000   0.00013  -0.00002   0.00011  -2.98442
   D11       -0.92917   0.00000   0.00012  -0.00001   0.00010  -0.92906
   D12        1.19596   0.00000   0.00014  -0.00001   0.00012   1.19609
         Item               Value     Threshold  Converged?
 Maximum Force            0.000008     0.000015     YES
 RMS     Force            0.000003     0.000010     YES
 Maximum Displacement     0.000195     0.000060     NO 
 RMS     Displacement     0.000079     0.000040     NO 
 Predicted change in Energy=-1.135697D-09
 GradGradGradGradGradGradGradGradGradGradGradGradGradGradGradGradGradGrad

                          Input orientation:                          
 ---------------------------------------------------------------------
 Center     Atomic     Atomic              Coordinates (Angstroms)
 Number     Number      Type              X           Y           Z
 ---------------------------------------------------------------------
    1          6             0       -1.654639    0.333979    0.014716
    2          1             0       -1.356622   -0.717754    0.027977
    3          1             0       -1.311713    0.787842    0.960286
    4          1             0       -2.745226    0.365998   -0.005603
    5          7             0       -1.121787    0.973856   -1.178849
    6          1             0       -1.511741    1.903108   -1.277731
    7          6             0        0.331946    1.038302   -1.200717
    8          1             0        0.740598    0.025794   -1.255144
    9          1             0        0.663743    1.574611   -2.091280
   10          1             0        0.774445    1.527469   -0.316068
 ---------------------------------------------------------------------
                    Distance matrix (angstroms):
                    1          2          3          4          5
     1  C    0.000000
     2  H    1.093221   0.000000
     3  H    1.103491   1.771451   0.000000
     4  H    1.091246   1.761779   1.779285   0.000000
     5  N    1.455325   2.091201   2.155591   2.093216   0.000000
     6  H    2.037891   2.932209   2.508495   2.345741   1.012596
     7  C    2.433078   2.728495   2.726588   3.368869   1.455325
     8  H    2.728494   2.568578   3.114615   3.718610   2.091201
     9  H    3.368869   3.718610   3.719340   4.175149   2.093216
    10  H    2.726588   3.114617   2.555031   3.719340   2.155591
                    6          7          8          9         10
     6  H    0.000000
     7  C    2.037891   0.000000
     8  H    2.932209   1.093221   0.000000
     9  H    2.345742   1.091246   1.761779   0.000000
    10  H    2.508495   1.103491   1.771451   1.779285   0.000000
 Stoichiometry    C2H7N
 Framework group  C1[X(C2H7N)]
 Deg. of freedom    24
 Full point group                 C1
 Largest Abelian subgroup         C1      NOp   1
 Largest concise Abelian subgroup C1      NOp   1
                         Standard orientation:                         
 ---------------------------------------------------------------------
 Center     Atomic     Atomic              Coordinates (Angstroms)
 Number     Number      Type              X           Y           Z
 ---------------------------------------------------------------------
    1          6             0       -1.216539   -0.222019    0.020197
    2          1             0       -1.284289   -0.964142   -0.779676
    3          1             0       -1.277515   -0.762621    0.980261
    4          1             0       -2.087574    0.430136   -0.062327
    5          7             0        0.000000    0.559412   -0.145242
    6          1             0        0.000000    1.341602    0.497820
    7          6             0        1.216539   -0.222019    0.020197
    8          1             0        1.284289   -0.964143   -0.779676
    9          1             0        2.087574    0.430136   -0.062328
   10          1             0        1.277516   -0.762620    0.980262
 ---------------------------------------------------------------------
 Rotational constants (GHZ):     34.9125940      9.2595401      8.1867369
 Standard basis: TZVP (5D, 7F)
 There are    99 symmetry adapted basis functions of A   symmetry.
 Integral buffers will be    131072 words long.
 Raffenetti 2 integral format.
 Two-electron integral symmetry is turned on.
    99 basis functions,   161 primitive gaussians,   102 cartesian basis functions
    13 alpha electrons       13 beta electrons
       nuclear repulsion energy        84.0658790353 Hartrees.
 NAtoms=   10 NActive=   10 NUniq=   10 SFac= 7.50D-01 NAtFMM=   80 NAOKFM=F Big=F
 One-electron integrals computed using PRISM.
 NBasis=    99 RedAO= T  NBF=    99
 NBsUse=    99 1.00D-06 NBFU=    99
 Initial guess read from the read-write file:
 Initial guess orbital symmetries:
       Occupied  (A) (A) (A) (A) (A) (A) (A) (A) (A) (A) (A) (A)
                 (A)
       Virtual   (A) (A) (A) (A) (A) (A) (A) (A) (A) (A) (A) (A)
                 (A) (A) (A) (A) (A) (A) (A) (A) (A) (A) (A) (A)
                 (A) (A) (A) (A) (A) (A) (A) (A) (A) (A) (A) (A)
                 (A) (A) (A) (A) (A) (A) (A) (A) (A) (A) (A) (A)
                 (A) (A) (A) (A) (A) (A) (A) (A) (A) (A) (A) (A)
                 (A) (A) (A) (A) (A) (A) (A) (A) (A) (A) (A) (A)
                 (A) (A) (A) (A) (A) (A) (A) (A) (A) (A) (A) (A)
                 (A) (A)
 Requested convergence on RMS density matrix=1.00D-08 within 128 cycles.
 Requested convergence on MAX density matrix=1.00D-06.
 Requested convergence on             energy=1.00D-06.
 No special actions if energy rises.
 Keep R1 integrals in memory in canonical form, NReq=    15680975.
 SCF Done:  E(RB+HF-LYP) =  -135.216786555     A.U. after    5 cycles
             Convg  =    0.1967D-08             -V/T =  2.0055
             S**2   =   0.0000
 Range of M.O.s used for correlation:     1    99
 NBasis=    99 NAE=    13 NBE=    13 NFC=     0 NFV=     0
 NROrb=     99 NOA=    13 NOB=    13 NVA=    86 NVB=    86

 **** Warning!!: The largest alpha MO coefficient is  0.12467881D+02

 Symmetrizing basis deriv contribution to polar:
 IMax=3 JMax=2 DiffMx= 0.00D+00
 G2DrvN: will do   11 centers at a time, making    1 passes doing MaxLOS=2.
 FoFDir/FoFCou used for L=0 through L=2.
 DoAtom=TTTTTTTTTT
          Differentiating once with respect to electric field.
                with respect to dipole field.
          Differentiating once with respect to nuclear coordinates.
          Store integrals in memory, NReq=    14622643.
          There are  33 degrees of freedom in the 1st order CPHF.
    30 vectors were produced by pass  0.
 AX will form  30 AO Fock derivatives at one time.
    30 vectors were produced by pass  1.
    30 vectors were produced by pass  2.
    30 vectors were produced by pass  3.
    30 vectors were produced by pass  4.
    11 vectors were produced by pass  5.
     3 vectors were produced by pass  6.
 Inv2:  IOpt= 1 Iter= 1 AM= 2.46D-15 Conv= 1.00D-12.
 Inverted reduced A of dimension  164 with in-core refinement.
 Isotropic polarizability for W=    0.000000       34.79 Bohr**3.
 End of Minotr Frequency-dependent properties file   721 does not exist.
 ***** Axes restored to original set *****
 -------------------------------------------------------------------
 Center     Atomic                   Forces (Hartrees/Bohr)
 Number     Number              X              Y              Z
 -------------------------------------------------------------------
    1          6           0.000000308    0.000000787    0.000000947
    2          1           0.000005003    0.000002002    0.000009440
    3          1          -0.000004139    0.000009104   -0.000001620
    4          1           0.000000249   -0.000004480   -0.000002215
    5          7           0.000000795   -0.000006274   -0.000002336
    6          1          -0.000003578   -0.000008530   -0.000010798
    7          6           0.000000295    0.000000781    0.000000950
    8          1           0.000005086    0.000002032    0.000009384
    9          1           0.000000226   -0.000004484   -0.000002199
   10          1          -0.000004246    0.000009062   -0.000001553
 -------------------------------------------------------------------
 Cartesian Forces:  Max     0.000010798 RMS     0.000004974

 GradGradGradGradGradGradGradGradGradGradGradGradGradGradGradGradGradGrad
 Berny optimization.
 Internal  Forces:  Max     0.000000150 RMS     0.000000077
 Search for a local minimum.
 Step number   5 out of a maximum of  46
 All quantities printed in internal units (Hartrees-Bohrs-Radians)
 Second derivative matrix not updated -- analytic derivatives used.
 Trust test=-1.19D+01 RLast= 4.44D-04 DXMaxT set to 3.00D-01
     Eigenvalues ---    0.00350   0.00374   0.01937   0.06157   0.06165
     Eigenvalues ---    0.06252   0.06287   0.10479   0.12520   0.13218
     Eigenvalues ---    0.15314   0.16375   0.16766   0.17934   0.23793
     Eigenvalues ---    0.30209   0.30384   0.32862   0.33080   0.33482
     Eigenvalues ---    0.33605   0.36042   0.36836   0.444101000.00000
     Eigenvalues --- 1000.000001000.000001000.000001000.000001000.00000
     Eigenvalues --- 1000.000001000.000001000.000001000.000001000.00000
     Eigenvalues --- 1000.00000
 RFO step:  Lambda= 0.00000000D+00.
 Quintic linear search produced a step of -0.92876.
 Iteration  1 RMS(Cart)=  0.00017017 RMS(Int)=  0.00000001
 Iteration  2 RMS(Cart)=  0.00000002 RMS(Int)=  0.00000000
 Variable       Old X    -DE/DX   Delta X   Delta X   Delta X     New X
                                 (Linear)    (Quad)   (Total)
    R1        2.06589   0.00000   0.00000   0.00000   0.00000   2.06589
    R2        2.08530   0.00000   0.00000   0.00000   0.00000   2.08530
    R3        2.06216   0.00000   0.00000   0.00000   0.00000   2.06216
    R4        2.75017   0.00000   0.00001  -0.00001   0.00000   2.75017
    R5        1.91353   0.00000  -0.00001   0.00001   0.00000   1.91353
    R6        2.75017   0.00000   0.00001  -0.00001   0.00000   2.75017
    R7        2.06589   0.00000   0.00000   0.00000   0.00000   2.06589
    R8        2.06216   0.00000   0.00000   0.00000   0.00000   2.06216
    R9        2.08530   0.00000   0.00000   0.00000   0.00000   2.08530
    A1        1.87610   0.00000   0.00000   0.00000   0.00000   1.87610
    A2        1.87643   0.00000  -0.00001   0.00001   0.00000   1.87643
    A3        1.91042   0.00000   0.00002  -0.00003  -0.00001   1.91040
    A4        1.89069   0.00000  -0.00001   0.00001   0.00000   1.89069
    A5        1.99122   0.00000  -0.00001   0.00002   0.00001   1.99123
    A6        1.91532   0.00000   0.00000   0.00000   0.00000   1.91532
    A7        1.92045   0.00000   0.00000  -0.00001  -0.00001   1.92044
    A8        1.97962   0.00000   0.00004  -0.00004  -0.00001   1.97962
    A9        1.92045   0.00000   0.00000  -0.00001  -0.00001   1.92044
   A10        1.91042   0.00000   0.00002  -0.00004  -0.00001   1.91040
   A11        1.91532   0.00000   0.00000   0.00000   0.00000   1.91532
   A12        1.99122   0.00000  -0.00001   0.00002   0.00001   1.99123
   A13        1.87643   0.00000  -0.00001   0.00001   0.00000   1.87643
   A14        1.87610   0.00000   0.00000   0.00000   0.00000   1.87610
   A15        1.89069   0.00000  -0.00001   0.00001   0.00000   1.89069
    D1        2.98442   0.00000   0.00010   0.00022   0.00032   2.98474
    D2       -1.13916   0.00000   0.00013   0.00016   0.00029  -1.13887
    D3       -1.19609   0.00000   0.00011   0.00020   0.00031  -1.19577
    D4        0.96351   0.00000   0.00014   0.00015   0.00029   0.96380
    D5        0.92906   0.00000   0.00010   0.00023   0.00032   0.92938
    D6        3.08866   0.00000   0.00012   0.00017   0.00030   3.08896
    D7        1.13916   0.00000  -0.00013  -0.00016  -0.00029   1.13887
    D8       -3.08866   0.00000  -0.00012  -0.00018  -0.00030  -3.08896
    D9       -0.96352   0.00000  -0.00014  -0.00015  -0.00029  -0.96381
   D10       -2.98442   0.00000  -0.00010  -0.00022  -0.00032  -2.98474
   D11       -0.92906   0.00000  -0.00010  -0.00023  -0.00033  -0.92939
   D12        1.19609   0.00000  -0.00011  -0.00020  -0.00032   1.19577
         Item               Value     Threshold  Converged?
 Maximum Force            0.000000     0.000015     YES
 RMS     Force            0.000000     0.000010     YES
 Maximum Displacement     0.000394     0.000060     NO 
 RMS     Displacement     0.000170     0.000040     NO 
 Predicted change in Energy=-2.452995D-09
 GradGradGradGradGradGradGradGradGradGradGradGradGradGradGradGradGradGrad

                          Input orientation:                          
 ---------------------------------------------------------------------
 Center     Atomic     Atomic              Coordinates (Angstroms)
 Number     Number      Type              X           Y           Z
 ---------------------------------------------------------------------
    1          6             0       -1.654646    0.333973    0.014697
    2          1             0       -1.356460   -0.717711    0.027936
    3          1             0       -1.311869    0.787851    0.960314
    4          1             0       -2.745238    0.365815   -0.005705
    5          7             0       -1.121803    0.973970   -1.178810
    6          1             0       -1.511673    1.903276   -1.277522
    7          6             0        0.331937    1.038296   -1.200734
    8          1             0        0.740491    0.025741   -1.255016
    9          1             0        0.663750    1.574434   -2.091395
   10          1             0        0.774515    1.527561   -0.316180
 ---------------------------------------------------------------------
                    Distance matrix (angstroms):
                    1          2          3          4          5
     1  C    0.000000
     2  H    1.093220   0.000000
     3  H    1.103491   1.771449   0.000000
     4  H    1.091247   1.761779   1.779285   0.000000
     5  N    1.455327   2.091192   2.155601   2.093219   0.000000
     6  H    2.037887   2.932215   2.508387   2.345844   1.012597
     7  C    2.433075   2.728346   2.726710   3.368876   1.455327
     8  H    2.728344   2.568247   3.114592   3.718432   2.091192
     9  H    3.368876   3.718432   3.719504   4.175172   2.093220
    10  H    2.726712   3.114597   2.555310   3.719504   2.155601
                    6          7          8          9         10
     6  H    0.000000
     7  C    2.037887   0.000000
     8  H    2.932215   1.093220   0.000000
     9  H    2.345846   1.091247   1.761779   0.000000
    10  H    2.508386   1.103491   1.771449   1.779285   0.000000
 Stoichiometry    C2H7N
 Framework group  C1[X(C2H7N)]
 Deg. of freedom    24
 Full point group                 C1
 Largest Abelian subgroup         C1      NOp   1
 Largest concise Abelian subgroup C1      NOp   1
                         Standard orientation:                         
 ---------------------------------------------------------------------
 Center     Atomic     Atomic              Coordinates (Angstroms)
 Number     Number      Type              X           Y           Z
 ---------------------------------------------------------------------
    1          6             0       -1.216538   -0.222019    0.020198
    2          1             0       -1.284125   -0.964332   -0.779511
    3          1             0       -1.277654   -0.762396    0.980379
    4          1             0       -2.087586    0.430083   -0.062625
    5          7             0        0.000000    0.559418   -0.145243
    6          1             0        0.000000    1.341591    0.497842
    7          6             0        1.216538   -0.222019    0.020198
    8          1             0        1.284122   -0.964335   -0.779508
    9          1             0        2.087586    0.430082   -0.062629
   10          1             0        1.277656   -0.762393    0.980381
 ---------------------------------------------------------------------
 Rotational constants (GHZ):     34.9124483      9.2595507      8.1867489
 Standard basis: TZVP (5D, 7F)
 There are    99 symmetry adapted basis functions of A   symmetry.
 Integral buffers will be    131072 words long.
 Raffenetti 2 integral format.
 Two-electron integral symmetry is turned on.
    99 basis functions,   161 primitive gaussians,   102 cartesian basis functions
    13 alpha electrons       13 beta electrons
       nuclear repulsion energy        84.0658614958 Hartrees.
 NAtoms=   10 NActive=   10 NUniq=   10 SFac= 7.50D-01 NAtFMM=   80 NAOKFM=F Big=F
 One-electron integrals computed using PRISM.
 NBasis=    99 RedAO= T  NBF=    99
 NBsUse=    99 1.00D-06 NBFU=    99
 Initial guess read from the read-write file:
 Initial guess orbital symmetries:
       Occupied  (A) (A) (A) (A) (A) (A) (A) (A) (A) (A) (A) (A)
                 (A)
       Virtual   (A) (A) (A) (A) (A) (A) (A) (A) (A) (A) (A) (A)
                 (A) (A) (A) (A) (A) (A) (A) (A) (A) (A) (A) (A)
                 (A) (A) (A) (A) (A) (A) (A) (A) (A) (A) (A) (A)
                 (A) (A) (A) (A) (A) (A) (A) (A) (A) (A) (A) (A)
                 (A) (A) (A) (A) (A) (A) (A) (A) (A) (A) (A) (A)
                 (A) (A) (A) (A) (A) (A) (A) (A) (A) (A) (A) (A)
                 (A) (A) (A) (A) (A) (A) (A) (A) (A) (A) (A) (A)
                 (A) (A)
 Requested convergence on RMS density matrix=1.00D-08 within 128 cycles.
 Requested convergence on MAX density matrix=1.00D-06.
 Requested convergence on             energy=1.00D-06.
 No special actions if energy rises.
 Keep R1 integrals in memory in canonical form, NReq=    15680975.
 SCF Done:  E(RB+HF-LYP) =  -135.216786578     A.U. after    5 cycles
             Convg  =    0.6320D-08             -V/T =  2.0055
             S**2   =   0.0000
 Range of M.O.s used for correlation:     1    99
 NBasis=    99 NAE=    13 NBE=    13 NFC=     0 NFV=     0
 NROrb=     99 NOA=    13 NOB=    13 NVA=    86 NVB=    86

 **** Warning!!: The largest alpha MO coefficient is  0.12467674D+02

 Symmetrizing basis deriv contribution to polar:
 IMax=3 JMax=2 DiffMx= 0.00D+00
 G2DrvN: will do   11 centers at a time, making    1 passes doing MaxLOS=2.
 FoFDir/FoFCou used for L=0 through L=2.
 DoAtom=TTTTTTTTTT
          Differentiating once with respect to electric field.
                with respect to dipole field.
          Differentiating once with respect to nuclear coordinates.
          Store integrals in memory, NReq=    14622643.
          There are  33 degrees of freedom in the 1st order CPHF.
    30 vectors were produced by pass  0.
 AX will form  30 AO Fock derivatives at one time.
    30 vectors were produced by pass  1.
    30 vectors were produced by pass  2.
    30 vectors were produced by pass  3.
    30 vectors were produced by pass  4.
    11 vectors were produced by pass  5.
     3 vectors were produced by pass  6.
 Inv2:  IOpt= 1 Iter= 1 AM= 1.81D-15 Conv= 1.00D-12.
 Inverted reduced A of dimension  164 with in-core refinement.
 Isotropic polarizability for W=    0.000000       34.79 Bohr**3.
 End of Minotr Frequency-dependent properties file   721 does not exist.
 ***** Axes restored to original set *****
 -------------------------------------------------------------------
 Center     Atomic                   Forces (Hartrees/Bohr)
 Number     Number              X              Y              Z
 -------------------------------------------------------------------
    1          6          -0.000000241    0.000002782    0.000001736
    2          1           0.000004165    0.000001727    0.000008811
    3          1          -0.000003120    0.000008313   -0.000001568
    4          1           0.000000289   -0.000003548   -0.000001728
    5          7           0.000002609   -0.000009367   -0.000001133
    6          1          -0.000004865   -0.000009203   -0.000013316
    7          6           0.000000181    0.000002930    0.000001466
    8          1           0.000004980    0.000002017    0.000008295
    9          1           0.000000169   -0.000003577   -0.000001648
   10          1          -0.000004166    0.000007925   -0.000000916
 -------------------------------------------------------------------
 Cartesian Forces:  Max     0.000013316 RMS     0.000005139

 GradGradGradGradGradGradGradGradGradGradGradGradGradGradGradGradGradGrad
 Berny optimization.
 Internal  Forces:  Max     0.000001481 RMS     0.000000725
 Search for a local minimum.
 Step number   6 out of a maximum of  46
 All quantities printed in internal units (Hartrees-Bohrs-Radians)
 Second derivative matrix not updated -- analytic derivatives used.
 Trust test= 3.89D+00 RLast= 6.37D-04 DXMaxT set to 3.00D-01
     Eigenvalues ---    0.00350   0.00374   0.01937   0.06157   0.06165
     Eigenvalues ---    0.06252   0.06287   0.10479   0.12520   0.13218
     Eigenvalues ---    0.15314   0.16375   0.16766   0.17934   0.23793
     Eigenvalues ---    0.30209   0.30383   0.32863   0.33081   0.33482
     Eigenvalues ---    0.33605   0.36042   0.36836   0.444101000.00000
     Eigenvalues --- 1000.000001000.000001000.000001000.000001000.00000
     Eigenvalues --- 1000.000001000.000001000.000001000.000001000.00000
     Eigenvalues --- 1000.00000
 RFO step:  Lambda= 0.00000000D+00.
 Quintic linear search produced a step of -0.09325.
 Iteration  1 RMS(Cart)=  0.00003038 RMS(Int)=  0.00000000
 Iteration  2 RMS(Cart)=  0.00000000 RMS(Int)=  0.00000000
 Variable       Old X    -DE/DX   Delta X   Delta X   Delta X     New X
                                 (Linear)    (Quad)   (Total)
    R1        2.06589   0.00000   0.00000   0.00000   0.00000   2.06589
    R2        2.08530   0.00000   0.00000   0.00000   0.00000   2.08530
    R3        2.06216   0.00000   0.00000   0.00000   0.00000   2.06216
    R4        2.75017   0.00000   0.00000   0.00000   0.00000   2.75017
    R5        1.91353   0.00000   0.00000   0.00000   0.00000   1.91353
    R6        2.75017   0.00000   0.00000   0.00000   0.00000   2.75017
    R7        2.06589   0.00000   0.00000   0.00000   0.00000   2.06589
    R8        2.06216   0.00000   0.00000   0.00000   0.00000   2.06216
    R9        2.08530   0.00000   0.00000   0.00000   0.00000   2.08530
    A1        1.87610   0.00000   0.00000   0.00000   0.00000   1.87609
    A2        1.87643   0.00000   0.00000   0.00000   0.00000   1.87643
    A3        1.91040   0.00000   0.00000   0.00000   0.00000   1.91040
    A4        1.89069   0.00000   0.00000   0.00000   0.00000   1.89069
    A5        1.99123   0.00000   0.00000   0.00000   0.00000   1.99123
    A6        1.91532   0.00000   0.00000   0.00000   0.00000   1.91532
    A7        1.92044   0.00000   0.00000  -0.00001  -0.00001   1.92044
    A8        1.97962   0.00000   0.00000  -0.00001  -0.00001   1.97961
    A9        1.92044   0.00000   0.00000  -0.00001  -0.00001   1.92044
   A10        1.91040   0.00000   0.00000   0.00000   0.00000   1.91040
   A11        1.91532   0.00000   0.00000   0.00000   0.00000   1.91532
   A12        1.99123   0.00000   0.00000   0.00000   0.00000   1.99123
   A13        1.87643   0.00000   0.00000   0.00000   0.00000   1.87643
   A14        1.87610   0.00000   0.00000   0.00000   0.00000   1.87609
   A15        1.89069   0.00000   0.00000   0.00000   0.00000   1.89069
    D1        2.98474   0.00000  -0.00002  -0.00001  -0.00003   2.98471
    D2       -1.13887   0.00000  -0.00001  -0.00004  -0.00006  -1.13893
    D3       -1.19577   0.00000  -0.00002  -0.00002  -0.00004  -1.19581
    D4        0.96380   0.00000  -0.00001  -0.00005  -0.00006   0.96374
    D5        0.92938   0.00000  -0.00002  -0.00001  -0.00003   0.92935
    D6        3.08896   0.00000  -0.00002  -0.00004  -0.00006   3.08890
    D7        1.13887   0.00000   0.00001   0.00004   0.00006   1.13893
    D8       -3.08896   0.00000   0.00002   0.00004   0.00006  -3.08890
    D9       -0.96381   0.00000   0.00001   0.00005   0.00006  -0.96374
   D10       -2.98474   0.00000   0.00002   0.00002   0.00004  -2.98471
   D11       -0.92939   0.00000   0.00002   0.00002   0.00004  -0.92935
   D12        1.19577   0.00000   0.00002   0.00002   0.00004   1.19581
         Item               Value     Threshold  Converged?
 Maximum Force            0.000001     0.000015     YES
 RMS     Force            0.000001     0.000010     YES
 Maximum Displacement     0.000064     0.000060     NO 
 RMS     Displacement     0.000030     0.000040     YES
 Predicted change in Energy=-6.457311D-10
 GradGradGradGradGradGradGradGradGradGradGradGradGradGradGradGradGradGrad

                          Input orientation:                          
 ---------------------------------------------------------------------
 Center     Atomic     Atomic              Coordinates (Angstroms)
 Number     Number      Type              X           Y           Z
 ---------------------------------------------------------------------
    1          6             0       -1.654644    0.333975    0.014698
    2          1             0       -1.356484   -0.717716    0.027943
    3          1             0       -1.311835    0.787854    0.960303
    4          1             0       -2.745235    0.365845   -0.005685
    5          7             0       -1.121804    0.973946   -1.178826
    6          1             0       -1.511681    1.903248   -1.277551
    7          6             0        0.331935    1.038297   -1.200731
    8          1             0        0.740507    0.025750   -1.255036
    9          1             0        0.663751    1.574464   -2.091373
   10          1             0        0.774494    1.527542   -0.316156
 ---------------------------------------------------------------------
                    Distance matrix (angstroms):
                    1          2          3          4          5
     1  C    0.000000
     2  H    1.093220   0.000000
     3  H    1.103491   1.771449   0.000000
     4  H    1.091247   1.761779   1.779287   0.000000
     5  N    1.455328   2.091192   2.155601   2.093220   0.000000
     6  H    2.037882   2.932210   2.508393   2.345827   1.012598
     7  C    2.433071   2.728366   2.726678   3.368873   1.455328
     8  H    2.728365   2.568297   3.114585   3.718459   2.091192
     9  H    3.368873   3.718459   3.719465   4.175169   2.093220
    10  H    2.726679   3.114588   2.555241   3.719465   2.155601
                    6          7          8          9         10
     6  H    0.000000
     7  C    2.037882   0.000000
     8  H    2.932210   1.093220   0.000000
     9  H    2.345828   1.091247   1.761779   0.000000
    10  H    2.508392   1.103491   1.771449   1.779287   0.000000
 Stoichiometry    C2H7N
 Framework group  C1[X(C2H7N)]
 Deg. of freedom    24
 Full point group                 C1
 Largest Abelian subgroup         C1      NOp   1
 Largest concise Abelian subgroup C1      NOp   1
                         Standard orientation:                         
 ---------------------------------------------------------------------
 Center     Atomic     Atomic              Coordinates (Angstroms)
 Number     Number      Type              X           Y           Z
 ---------------------------------------------------------------------
    1          6             0       -1.216536   -0.222019    0.020198
    2          1             0       -1.284149   -0.964296   -0.779543
    3          1             0       -1.277620   -0.762442    0.980356
    4          1             0       -2.087584    0.430088   -0.062568
    5          7             0        0.000000    0.559421   -0.145245
    6          1             0        0.000000    1.341582    0.497856
    7          6             0        1.216536   -0.222019    0.020198
    8          1             0        1.284148   -0.964297   -0.779541
    9          1             0        2.087585    0.430087   -0.062570
   10          1             0        1.277621   -0.762440    0.980357
 ---------------------------------------------------------------------
 Rotational constants (GHZ):     34.9122846      9.2595797      8.1867670
 Standard basis: TZVP (5D, 7F)
 There are    99 symmetry adapted basis functions of A   symmetry.
 Integral buffers will be    131072 words long.
 Raffenetti 2 integral format.
 Two-electron integral symmetry is turned on.
    99 basis functions,   161 primitive gaussians,   102 cartesian basis functions
    13 alpha electrons       13 beta electrons
       nuclear repulsion energy        84.0658798885 Hartrees.
 NAtoms=   10 NActive=   10 NUniq=   10 SFac= 7.50D-01 NAtFMM=   80 NAOKFM=F Big=F
 One-electron integrals computed using PRISM.
 NBasis=    99 RedAO= T  NBF=    99
 NBsUse=    99 1.00D-06 NBFU=    99
 Initial guess read from the read-write file:
 Initial guess orbital symmetries:
       Occupied  (A) (A) (A) (A) (A) (A) (A) (A) (A) (A) (A) (A)
                 (A)
       Virtual   (A) (A) (A) (A) (A) (A) (A) (A) (A) (A) (A) (A)
                 (A) (A) (A) (A) (A) (A) (A) (A) (A) (A) (A) (A)
                 (A) (A) (A) (A) (A) (A) (A) (A) (A) (A) (A) (A)
                 (A) (A) (A) (A) (A) (A) (A) (A) (A) (A) (A) (A)
                 (A) (A) (A) (A) (A) (A) (A) (A) (A) (A) (A) (A)
                 (A) (A) (A) (A) (A) (A) (A) (A) (A) (A) (A) (A)
                 (A) (A) (A) (A) (A) (A) (A) (A) (A) (A) (A) (A)
                 (A) (A)
 Requested convergence on RMS density matrix=1.00D-08 within 128 cycles.
 Requested convergence on MAX density matrix=1.00D-06.
 Requested convergence on             energy=1.00D-06.
 No special actions if energy rises.
 Keep R1 integrals in memory in canonical form, NReq=    15680975.
 SCF Done:  E(RB+HF-LYP) =  -135.216786573     A.U. after    4 cycles
             Convg  =    0.4947D-08             -V/T =  2.0055
             S**2   =   0.0000
 Range of M.O.s used for correlation:     1    99
 NBasis=    99 NAE=    13 NBE=    13 NFC=     0 NFV=     0
 NROrb=     99 NOA=    13 NOB=    13 NVA=    86 NVB=    86

 **** Warning!!: The largest alpha MO coefficient is  0.12467735D+02

 Symmetrizing basis deriv contribution to polar:
 IMax=3 JMax=2 DiffMx= 0.00D+00
 G2DrvN: will do   11 centers at a time, making    1 passes doing MaxLOS=2.
 FoFDir/FoFCou used for L=0 through L=2.
 DoAtom=TTTTTTTTTT
          Differentiating once with respect to electric field.
                with respect to dipole field.
          Differentiating once with respect to nuclear coordinates.
          Store integrals in memory, NReq=    14622643.
          There are  33 degrees of freedom in the 1st order CPHF.
    30 vectors were produced by pass  0.
 AX will form  30 AO Fock derivatives at one time.
    30 vectors were produced by pass  1.
    30 vectors were produced by pass  2.
    30 vectors were produced by pass  3.
    30 vectors were produced by pass  4.
    11 vectors were produced by pass  5.
     3 vectors were produced by pass  6.
 Inv2:  IOpt= 1 Iter= 1 AM= 1.83D-15 Conv= 1.00D-12.
 Inverted reduced A of dimension  164 with in-core refinement.
 Isotropic polarizability for W=    0.000000       34.79 Bohr**3.
 End of Minotr Frequency-dependent properties file   721 does not exist.
 ***** Axes restored to original set *****
 -------------------------------------------------------------------
 Center     Atomic                   Forces (Hartrees/Bohr)
 Number     Number              X              Y              Z
 -------------------------------------------------------------------
    1          6          -0.000000015    0.000001394    0.000001178
    2          1           0.000004156    0.000001757    0.000009069
    3          1          -0.000003471    0.000008609   -0.000001641
    4          1           0.000000239   -0.000003583   -0.000001711
    5          7           0.000002570   -0.000007077    0.000000116
    6          1          -0.000004936   -0.000009462   -0.000013561
    7          6           0.000000308    0.000001497    0.000000974
    8          1           0.000005184    0.000002122    0.000008432
    9          1           0.000000219   -0.000003582   -0.000001694
   10          1          -0.000004253    0.000008325   -0.000001161
 -------------------------------------------------------------------
 Cartesian Forces:  Max     0.000013561 RMS     0.000005084

 GradGradGradGradGradGradGradGradGradGradGradGradGradGradGradGradGradGrad
 Berny optimization.
 Internal  Forces:  Max     0.000001273 RMS     0.000000610
 Search for a local minimum.
 Step number   7 out of a maximum of  46
 All quantities printed in internal units (Hartrees-Bohrs-Radians)
 Second derivative matrix not updated -- analytic derivatives used.
 Trust test=-7.62D+00 RLast= 1.70D-04 DXMaxT set to 1.50D-01
     Eigenvalues ---    0.00350   0.00374   0.01937   0.06157   0.06165
     Eigenvalues ---    0.06252   0.06287   0.10479   0.12520   0.13218
     Eigenvalues ---    0.15314   0.16375   0.16766   0.17934   0.23793
     Eigenvalues ---    0.30209   0.30384   0.32863   0.33081   0.33482
     Eigenvalues ---    0.33605   0.36042   0.36836   0.444091000.00000
     Eigenvalues --- 1000.000001000.000001000.000001000.000001000.00000
     Eigenvalues --- 1000.000001000.000001000.000001000.000001000.00000
     Eigenvalues --- 1000.00000
 RFO step:  Lambda= 0.00000000D+00.
 Quintic linear search produced a step of -0.92962.
 Iteration  1 RMS(Cart)=  0.00002406 RMS(Int)=  0.00000000
 Iteration  2 RMS(Cart)=  0.00000000 RMS(Int)=  0.00000000
 Variable       Old X    -DE/DX   Delta X   Delta X   Delta X     New X
                                 (Linear)    (Quad)   (Total)
    R1        2.06589   0.00000   0.00000   0.00000   0.00000   2.06589
    R2        2.08530   0.00000   0.00000   0.00000   0.00000   2.08530
    R3        2.06216   0.00000   0.00000   0.00000   0.00000   2.06216
    R4        2.75017   0.00000   0.00000   0.00000   0.00000   2.75017
    R5        1.91353   0.00000   0.00000   0.00000   0.00000   1.91353
    R6        2.75017   0.00000   0.00000   0.00000   0.00000   2.75017
    R7        2.06589   0.00000   0.00000   0.00000   0.00000   2.06589
    R8        2.06216   0.00000   0.00000   0.00000   0.00000   2.06216
    R9        2.08530   0.00000   0.00000   0.00000   0.00000   2.08530
    A1        1.87609   0.00000   0.00000   0.00000   0.00000   1.87609
    A2        1.87643   0.00000   0.00000   0.00000   0.00000   1.87643
    A3        1.91040   0.00000   0.00000   0.00000   0.00000   1.91040
    A4        1.89069   0.00000   0.00000   0.00000   0.00000   1.89069
    A5        1.99123   0.00000   0.00000   0.00000   0.00000   1.99123
    A6        1.91532   0.00000   0.00000   0.00000   0.00000   1.91532
    A7        1.92044   0.00000   0.00001   0.00001   0.00002   1.92045
    A8        1.97961   0.00000   0.00001   0.00000   0.00001   1.97962
    A9        1.92044   0.00000   0.00001   0.00001   0.00002   1.92045
   A10        1.91040   0.00000   0.00000   0.00000   0.00000   1.91040
   A11        1.91532   0.00000   0.00000   0.00000   0.00000   1.91532
   A12        1.99123   0.00000   0.00000   0.00000   0.00000   1.99123
   A13        1.87643   0.00000   0.00000   0.00000   0.00000   1.87643
   A14        1.87609   0.00000   0.00000   0.00000   0.00000   1.87609
   A15        1.89069   0.00000   0.00000   0.00000   0.00000   1.89069
    D1        2.98471   0.00000   0.00003  -0.00003   0.00000   2.98471
    D2       -1.13893   0.00000   0.00005  -0.00001   0.00004  -1.13889
    D3       -1.19581   0.00000   0.00003  -0.00003   0.00000  -1.19581
    D4        0.96374   0.00000   0.00006  -0.00001   0.00004   0.96379
    D5        0.92935   0.00000   0.00003  -0.00003   0.00000   0.92935
    D6        3.08890   0.00000   0.00005  -0.00001   0.00004   3.08894
    D7        1.13893   0.00000  -0.00006   0.00000  -0.00005   1.13887
    D8       -3.08890   0.00000  -0.00005   0.00000  -0.00005  -3.08896
    D9       -0.96374   0.00000  -0.00006   0.00000  -0.00006  -0.96380
   D10       -2.98471   0.00000  -0.00003   0.00002  -0.00001  -2.98472
   D11       -0.92935   0.00000  -0.00003   0.00002  -0.00001  -0.92936
   D12        1.19581   0.00000  -0.00004   0.00002  -0.00001   1.19579
         Item               Value     Threshold  Converged?
 Maximum Force            0.000001     0.000015     YES
 RMS     Force            0.000001     0.000010     YES
 Maximum Displacement     0.000048     0.000060     YES
 RMS     Displacement     0.000024     0.000040     YES
 Predicted change in Energy=-3.894049D-10
 Optimization completed.
    -- Stationary point found.
                           ----------------------------
                           !   Optimized Parameters   !
                           ! (Angstroms and Degrees)  !
 --------------------------                            --------------------------
 ! Name  Definition              Value          Derivative Info.                !
 --------------------------------------------------------------------------------
 ! R1    R(1,2)                  1.0932         -DE/DX =    0.0                 !
 ! R2    R(1,3)                  1.1035         -DE/DX =    0.0                 !
 ! R3    R(1,4)                  1.0912         -DE/DX =    0.0                 !
 ! R4    R(1,5)                  1.4553         -DE/DX =    0.0                 !
 ! R5    R(5,6)                  1.0126         -DE/DX =    0.0                 !
 ! R6    R(5,7)                  1.4553         -DE/DX =    0.0                 !
 ! R7    R(7,8)                  1.0932         -DE/DX =    0.0                 !
 ! R8    R(7,9)                  1.0912         -DE/DX =    0.0                 !
 ! R9    R(7,10)                 1.1035         -DE/DX =    0.0                 !
 ! A1    A(2,1,3)              107.4923         -DE/DX =    0.0                 !
 ! A2    A(2,1,4)              107.5113         -DE/DX =    0.0                 !
 ! A3    A(2,1,5)              109.4581         -DE/DX =    0.0                 !
 ! A4    A(3,1,4)              108.3286         -DE/DX =    0.0                 !
 ! A5    A(3,1,5)              114.0889         -DE/DX =    0.0                 !
 ! A6    A(4,1,5)              109.7398         -DE/DX =    0.0                 !
 ! A7    A(1,5,6)              110.0328         -DE/DX =    0.0                 !
 ! A8    A(1,5,7)              113.4232         -DE/DX =    0.0                 !
 ! A9    A(6,5,7)              110.0328         -DE/DX =    0.0                 !
 ! A10   A(5,7,8)              109.4581         -DE/DX =    0.0                 !
 ! A11   A(5,7,9)              109.7398         -DE/DX =    0.0                 !
 ! A12   A(5,7,10)             114.0889         -DE/DX =    0.0                 !
 ! A13   A(8,7,9)              107.5113         -DE/DX =    0.0                 !
 ! A14   A(8,7,10)             107.4923         -DE/DX =    0.0                 !
 ! A15   A(9,7,10)             108.3286         -DE/DX =    0.0                 !
 ! D1    D(2,1,5,6)            171.0111         -DE/DX =    0.0                 !
 ! D2    D(2,1,5,7)            -65.2559         -DE/DX =    0.0                 !
 ! D3    D(3,1,5,6)            -68.5148         -DE/DX =    0.0                 !
 ! D4    D(3,1,5,7)             55.2183         -DE/DX =    0.0                 !
 ! D5    D(4,1,5,6)             53.2479         -DE/DX =    0.0                 !
 ! D6    D(4,1,5,7)            176.981          -DE/DX =    0.0                 !
 ! D7    D(1,5,7,8)             65.2557         -DE/DX =    0.0                 !
 ! D8    D(1,5,7,9)           -176.9811         -DE/DX =    0.0                 !
 ! D9    D(1,5,7,10)           -55.2184         -DE/DX =    0.0                 !
 ! D10   D(6,5,7,8)           -171.0112         -DE/DX =    0.0                 !
 ! D11   D(6,5,7,9)            -53.248          -DE/DX =    0.0                 !
 ! D12   D(6,5,7,10)            68.5147         -DE/DX =    0.0                 !
 --------------------------------------------------------------------------------
 GradGradGradGradGradGradGradGradGradGradGradGradGradGradGradGradGradGrad

                          Input orientation:                          
 ---------------------------------------------------------------------
 Center     Atomic     Atomic              Coordinates (Angstroms)
 Number     Number      Type              X           Y           Z
 ---------------------------------------------------------------------
    1          6             0       -1.654644    0.333975    0.014698
    2          1             0       -1.356484   -0.717716    0.027943
    3          1             0       -1.311835    0.787854    0.960303
    4          1             0       -2.745235    0.365845   -0.005685
    5          7             0       -1.121804    0.973946   -1.178826
    6          1             0       -1.511681    1.903248   -1.277551
    7          6             0        0.331935    1.038297   -1.200731
    8          1             0        0.740507    0.025750   -1.255036
    9          1             0        0.663751    1.574464   -2.091373
   10          1             0        0.774494    1.527542   -0.316156
 ---------------------------------------------------------------------
                    Distance matrix (angstroms):
                    1          2          3          4          5
     1  C    0.000000
     2  H    1.093220   0.000000
     3  H    1.103491   1.771449   0.000000
     4  H    1.091247   1.761779   1.779287   0.000000
     5  N    1.455328   2.091192   2.155601   2.093220   0.000000
     6  H    2.037882   2.932210   2.508393   2.345827   1.012598
     7  C    2.433071   2.728366   2.726678   3.368873   1.455328
     8  H    2.728365   2.568297   3.114585   3.718459   2.091192
     9  H    3.368873   3.718459   3.719465   4.175169   2.093220
    10  H    2.726679   3.114588   2.555241   3.719465   2.155601
                    6          7          8          9         10
     6  H    0.000000
     7  C    2.037882   0.000000
     8  H    2.932210   1.093220   0.000000
     9  H    2.345828   1.091247   1.761779   0.000000
    10  H    2.508392   1.103491   1.771449   1.779287   0.000000
 Stoichiometry    C2H7N
 Framework group  C1[X(C2H7N)]
 Deg. of freedom    24
 Full point group                 C1
 Largest Abelian subgroup         C1      NOp   1
 Largest concise Abelian subgroup C1      NOp   1
                         Standard orientation:                         
 ---------------------------------------------------------------------
 Center     Atomic     Atomic              Coordinates (Angstroms)
 Number     Number      Type              X           Y           Z
 ---------------------------------------------------------------------
    1          6             0       -1.216536   -0.222019    0.020198
    2          1             0       -1.284149   -0.964296   -0.779543
    3          1             0       -1.277620   -0.762442    0.980356
    4          1             0       -2.087584    0.430088   -0.062568
    5          7             0        0.000000    0.559421   -0.145245
    6          1             0        0.000000    1.341582    0.497856
    7          6             0        1.216536   -0.222019    0.020198
    8          1             0        1.284148   -0.964297   -0.779541
    9          1             0        2.087585    0.430087   -0.062570
   10          1             0        1.277621   -0.762440    0.980357
 ---------------------------------------------------------------------
 Rotational constants (GHZ):     34.9122846      9.2595797      8.1867670

 **********************************************************************

            Population analysis using the SCF density.

 **********************************************************************

 Orbital symmetries:
       Occupied  (A) (A) (A) (A) (A) (A) (A) (A) (A) (A) (A) (A)
                 (A)
       Virtual   (A) (A) (A) (A) (A) (A) (A) (A) (A) (A) (A) (A)
                 (A) (A) (A) (A) (A) (A) (A) (A) (A) (A) (A) (A)
                 (A) (A) (A) (A) (A) (A) (A) (A) (A) (A) (A) (A)
                 (A) (A) (A) (A) (A) (A) (A) (A) (A) (A) (A) (A)
                 (A) (A) (A) (A) (A) (A) (A) (A) (A) (A) (A) (A)
                 (A) (A) (A) (A) (A) (A) (A) (A) (A) (A) (A) (A)
                 (A) (A) (A) (A) (A) (A) (A) (A) (A) (A) (A) (A)
                 (A) (A)
 The electronic state is 1-A.
 Alpha  occ. eigenvalues --  -14.29896 -10.18561 -10.18559  -0.89972  -0.70228
 Alpha  occ. eigenvalues --   -0.62942  -0.49128  -0.44337  -0.43870  -0.38922
 Alpha  occ. eigenvalues --   -0.36852  -0.36621  -0.22374
 Alpha virt. eigenvalues --    0.03230   0.06950   0.07937   0.09972   0.11020
 Alpha virt. eigenvalues --    0.13053   0.13945   0.14725   0.18307   0.22089
 Alpha virt. eigenvalues --    0.22614   0.24000   0.29946   0.32600   0.32914
 Alpha virt. eigenvalues --    0.37043   0.39319   0.44332   0.44647   0.47107
 Alpha virt. eigenvalues --    0.47122   0.48229   0.49140   0.52407   0.53974
 Alpha virt. eigenvalues --    0.54665   0.60617   0.64737   1.14209   1.15038
 Alpha virt. eigenvalues --    1.23613   1.24853   1.25988   1.29314   1.31339
 Alpha virt. eigenvalues --    1.34803   1.38483   1.40821   1.48890   1.51302
 Alpha virt. eigenvalues --    1.53757   1.53853   1.58427   1.62949   1.70564
 Alpha virt. eigenvalues --    1.73426   1.77887   1.77921   1.79028   1.80164
 Alpha virt. eigenvalues --    1.84286   1.94647   1.96431   2.01409   2.04243
 Alpha virt. eigenvalues --    2.10022   2.17428   2.25184   2.25882   2.30402
 Alpha virt. eigenvalues --    2.31443   2.36048   2.44212   2.45696   2.49889
 Alpha virt. eigenvalues --    2.56973   2.57515   2.61547   2.65190   2.70662
 Alpha virt. eigenvalues --    2.71189   2.82961   2.91103   2.93244   3.05451
 Alpha virt. eigenvalues --    3.09224   3.25854   3.31462   3.33025   3.34661
 Alpha virt. eigenvalues --    3.37538   3.74007   3.85312  21.88980  21.98131
 Alpha virt. eigenvalues --   31.78612
          Condensed to atoms (all electrons):
              1          2          3          4          5          6
     1  C    4.910822   0.402660   0.404677   0.394296   0.311985  -0.053746
     2  H    0.402660   0.595390  -0.062265  -0.018593  -0.043259   0.010402
     3  H    0.404677  -0.062265   0.685962  -0.039943  -0.077851  -0.007700
     4  H    0.394296  -0.018593  -0.039943   0.568445  -0.032728  -0.006731
     5  N    0.311985  -0.043259  -0.077851  -0.032728   6.616465   0.380506
     6  H   -0.053746   0.010402  -0.007700  -0.006731   0.380506   0.541132
     7  C   -0.101804  -0.007380  -0.007589   0.013334   0.311985  -0.053746
     8  H   -0.007380   0.009899  -0.004947  -0.000026  -0.043259   0.010402
     9  H    0.013334  -0.000026  -0.000594  -0.000550  -0.032728  -0.006731
    10  H   -0.007589  -0.004947   0.024527  -0.000594  -0.077851  -0.007700
              7          8          9         10
     1  C   -0.101804  -0.007380   0.013334  -0.007589
     2  H   -0.007380   0.009899  -0.000026  -0.004947
     3  H   -0.007589  -0.004947  -0.000594   0.024527
     4  H    0.013334  -0.000026  -0.000550  -0.000594
     5  N    0.311985  -0.043259  -0.032728  -0.077851
     6  H   -0.053746   0.010402  -0.006731  -0.007700
     7  C    4.910822   0.402660   0.394296   0.404677
     8  H    0.402660   0.595390  -0.018593  -0.062265
     9  H    0.394296  -0.018593   0.568445  -0.039943
    10  H    0.404677  -0.062265  -0.039943   0.685962
 Mulliken atomic charges:
              1
     1  C   -0.267255
     2  H    0.118120
     3  H    0.085724
     4  H    0.123090
     5  N   -0.313266
     6  H    0.193911
     7  C   -0.267256
     8  H    0.118120
     9  H    0.123090
    10  H    0.085724
 Sum of Mulliken charges=   0.00000
 Atomic charges with hydrogens summed into heavy atoms:
              1
     1  C    0.059678
     2  H    0.000000
     3  H    0.000000
     4  H    0.000000
     5  N   -0.119356
     6  H    0.000000
     7  C    0.059678
     8  H    0.000000
     9  H    0.000000
    10  H    0.000000
 Sum of Mulliken charges=   0.00000
 APT atomic charges:
              1
     1  C    0.366864
     2  H   -0.029605
     3  H   -0.102659
     4  H   -0.025658
     5  N   -0.531898
     6  H    0.114016
     7  C    0.366864
     8  H   -0.029605
     9  H   -0.025658
    10  H   -0.102659
 Sum of APT charges=   0.00000
 APT Atomic charges with hydrogens summed into heavy atoms:
              1
     1  C    0.208941
     2  H    0.000000
     3  H    0.000000
     4  H    0.000000
     5  N   -0.417882
     6  H    0.000000
     7  C    0.208941
     8  H    0.000000
     9  H    0.000000
    10  H    0.000000
 Sum of APT charges=   0.00000
 Electronic spatial extent (au):  <R**2>=   205.7864
 Charge=     0.0000 electrons
 Dipole moment (field-independent basis, Debye):
    X=     0.0000    Y=    -0.1473    Z=     1.0047  Tot=     1.0155
 Quadrupole moment (field-independent basis, Debye-Ang):
   XX=   -19.9251   YY=   -20.7156   ZZ=   -22.1260
   XY=     0.0000   XZ=     0.0000   YZ=     2.1366
 Traceless Quadrupole moment (field-independent basis, Debye-Ang):
   XX=     0.9972   YY=     0.2067   ZZ=    -1.2038
   XY=     0.0000   XZ=     0.0000   YZ=     2.1366
 Octapole moment (field-independent basis, Debye-Ang**2):
  XXX=     0.0000  YYY=     3.5033  ZZZ=     0.7232  XYY=     0.0000
  XXY=     1.9836  XXZ=    -0.8565  XZZ=     0.0000  YZZ=    -0.6546
  YYZ=     1.5832  XYZ=     0.0000
 Hexadecapole moment (field-independent basis, Debye-Ang**3):
 XXXX=  -183.7512 YYYY=   -58.1175 ZZZZ=   -41.5974 XXXY=     0.0000
 XXXZ=     0.0000 YYYX=     0.0000 YYYZ=     4.9511 ZZZX=     0.0000
 ZZZY=     2.6900 XXYY=   -40.2209 XXZZ=   -39.3093 YYZZ=   -16.4694
 XXYZ=     0.6615 YYXZ=     0.0000 ZZXY=     0.0000
 N-N= 8.406587988853D+01 E-N=-4.819220732101D+02  KE= 1.344793205897D+02
  Exact polarizability:  38.485   0.000  33.613   0.000  -0.350  32.280
 Approx polarizability:  44.936   0.000  45.147   0.000  -0.287  43.194
 Rotating derivatives to standard orientation.
 Full mass-weighted force constant matrix:
 Low frequencies ---  -32.7971  -18.8800   -0.0006   -0.0002   -0.0002   10.2329
 Low frequencies ---  234.7041  263.3628  384.0767
 Diagonal vibrational polarizability:
        1.5067552       6.2052216       3.6665691
 Harmonic frequencies (cm**-1), IR intensities (KM/Mole), Raman scattering
 activities (A**4/AMU), depolarization ratios for plane and unpolarized
 incident light, reduced masses (AMU), force constants (mDyne/A),
 and normal coordinates:
                     1                      2                      3
                     A                      A                      A
 Frequencies --   234.7030               263.3586               384.0751
 Red. masses --     1.0325                 1.2053                 2.1641
 Frc consts  --     0.0335                 0.0493                 0.1881
 IR Inten    --     0.1196                 3.1860                 7.1245
 Atom AN      X      Y      Z        X      Y      Z        X      Y      Z
   1   6     0.00   0.01   0.03     0.01   0.00   0.04    -0.17   0.06  -0.01
   2   1     0.20  -0.27   0.27    -0.28   0.18  -0.10    -0.38   0.12  -0.04
   3   1    -0.16   0.33   0.20     0.28  -0.21  -0.06    -0.39   0.07  -0.02
   4   1    -0.02  -0.06  -0.37     0.02   0.07   0.47     0.04   0.34  -0.02
   5   7     0.00   0.00   0.00     0.00  -0.01  -0.11     0.00  -0.18   0.04
   6   1     0.02   0.00   0.00     0.00   0.06  -0.19     0.00  -0.03  -0.15
   7   6     0.00  -0.01  -0.03    -0.01   0.00   0.04     0.17   0.06  -0.01
   8   1     0.20   0.27  -0.27     0.28   0.18  -0.10     0.38   0.12  -0.04
   9   1    -0.02   0.06   0.37    -0.02   0.07   0.47    -0.04   0.34  -0.02
  10   1    -0.16  -0.33  -0.20    -0.28  -0.21  -0.06     0.39   0.07  -0.02
                     4                      5                      6
                     A                      A                      A
 Frequencies --   757.7678               938.0919              1037.1320
 Red. masses --     1.2957                 2.2927                 1.1959
 Frc consts  --     0.4384                 1.1887                 0.7579
 IR Inten    --   130.5248                 3.4087                 8.7836
 Atom AN      X      Y      Z        X      Y      Z        X      Y      Z
   1   6     0.07   0.02  -0.01     0.19   0.07  -0.03    -0.01   0.08   0.03
   2   1     0.16   0.09  -0.09    -0.09   0.01   0.05     0.44   0.15  -0.08
   3   1    -0.03  -0.11  -0.08     0.11   0.20   0.06     0.08  -0.18  -0.10
   4   1     0.05  -0.01  -0.04     0.38   0.32  -0.01    -0.27  -0.29  -0.06
   5   7     0.00  -0.07   0.10     0.00  -0.16   0.01    -0.04   0.00   0.00
   6   1     0.00   0.57  -0.72     0.00  -0.41   0.31     0.34   0.00   0.00
   7   6    -0.07   0.02  -0.01    -0.19   0.07  -0.03    -0.01  -0.08  -0.03
   8   1    -0.16   0.09  -0.09     0.09   0.01   0.05     0.44  -0.15   0.08
   9   1    -0.05  -0.01  -0.04    -0.38   0.32  -0.01    -0.27   0.29   0.06
  10   1     0.03  -0.11  -0.08    -0.11   0.20   0.06     0.08   0.18   0.10
                     7                      8                      9
                     A                      A                      A
 Frequencies --  1101.0458              1166.7883              1185.0307
 Red. masses --     1.3246                 3.4787                 1.4633
 Frc consts  --     0.9461                 2.7903                 1.2108
 IR Inten    --     0.0111                32.0576                 7.1538
 Atom AN      X      Y      Z        X      Y      Z        X      Y      Z
   1   6    -0.02  -0.07   0.09    -0.20  -0.08  -0.03    -0.03   0.03  -0.10
   2   1     0.08   0.18  -0.16    -0.08  -0.22   0.10    -0.16  -0.27   0.19
   3   1    -0.49  -0.26  -0.05     0.20   0.00   0.02     0.42   0.24   0.06
   4   1     0.17   0.14  -0.20    -0.31  -0.23   0.12    -0.20  -0.15   0.21
   5   7     0.06   0.00   0.00     0.33   0.00   0.00     0.00  -0.04   0.11
   6   1     0.22   0.00   0.00     0.51   0.00   0.00     0.00   0.09  -0.06
   7   6    -0.02   0.07  -0.09    -0.20   0.08   0.03     0.03   0.03  -0.10
   8   1     0.08  -0.18   0.16    -0.08   0.22  -0.10     0.16  -0.27   0.19
   9   1     0.17  -0.14   0.20    -0.31   0.23  -0.12     0.20  -0.15   0.21
  10   1    -0.49   0.26   0.05     0.20   0.00  -0.02    -0.42   0.24   0.06
                    10                     11                     12
                     A                      A                      A
 Frequencies --  1267.7280              1447.8982              1473.2068
 Red. masses --     1.7146                 1.1552                 1.1641
 Frc consts  --     1.6236                 1.4269                 1.4885
 IR Inten    --     0.0944                 1.0198                 2.3581
 Atom AN      X      Y      Z        X      Y      Z        X      Y      Z
   1   6    -0.03   0.12   0.04     0.07   0.04   0.01    -0.07  -0.04  -0.01
   2   1     0.43   0.12   0.00    -0.39  -0.05   0.11     0.46  -0.05  -0.04
   3   1     0.19  -0.20  -0.12    -0.31  -0.13  -0.09     0.19   0.07   0.06
   4   1    -0.28  -0.23  -0.07    -0.25  -0.37  -0.04     0.24   0.38   0.17
   5   7     0.00  -0.15  -0.05     0.03   0.00   0.00     0.00   0.00   0.00
   6   1     0.00  -0.28   0.12    -0.11   0.00   0.00     0.00   0.03  -0.03
   7   6     0.03   0.12   0.04     0.07  -0.04  -0.01     0.07  -0.04  -0.01
   8   1    -0.43   0.12   0.00    -0.39   0.05  -0.11    -0.46  -0.05  -0.04
   9   1     0.28  -0.23  -0.07    -0.25   0.37   0.04    -0.24   0.38   0.17
  10   1    -0.19  -0.20  -0.12    -0.31   0.13   0.09    -0.19   0.07   0.06
                    13                     14                     15
                     A                      A                      A
 Frequencies --  1477.6926              1488.5517              1496.5119
 Red. masses --     1.1263                 1.0918                 1.0714
 Frc consts  --     1.4491                 1.4254                 1.4137
 IR Inten    --     7.6846                 2.2620                10.2014
 Atom AN      X      Y      Z        X      Y      Z        X      Y      Z
   1   6     0.03  -0.02  -0.05     0.02  -0.04   0.00    -0.03  -0.02   0.03
   2   1     0.12  -0.11   0.03    -0.29   0.22  -0.22    -0.18   0.15  -0.12
   3   1    -0.34   0.17   0.05     0.15   0.25   0.14     0.44  -0.02   0.04
   4   1    -0.01   0.00   0.45    -0.03  -0.12  -0.22     0.08   0.07  -0.47
   5   7    -0.05   0.00   0.00    -0.05   0.00   0.00     0.00   0.00   0.02
   6   1     0.48   0.00   0.00     0.54   0.00   0.00     0.00   0.03  -0.02
   7   6     0.03   0.02   0.05     0.02   0.04   0.00     0.03  -0.02   0.03
   8   1     0.12   0.11  -0.03    -0.29  -0.22   0.22     0.18   0.15  -0.12
   9   1    -0.01   0.00  -0.45    -0.03   0.12   0.22    -0.08   0.07  -0.47
  10   1    -0.34  -0.17  -0.05     0.15  -0.25  -0.14    -0.44  -0.02   0.04
                    16                     17                     18
                     A                      A                      A
 Frequencies --  1519.5851              1520.3014              2923.0954
 Red. masses --     1.0657                 1.0409                 1.0617
 Frc consts  --     1.4499                 1.4174                 5.3448
 IR Inten    --    13.2934                 2.2715                48.5714
 Atom AN      X      Y      Z        X      Y      Z        X      Y      Z
   1   6     0.00  -0.02   0.01     0.00   0.03   0.00     0.01   0.03  -0.04
   2   1     0.14   0.28  -0.25    -0.07  -0.33   0.32    -0.01  -0.06  -0.09
   3   1    -0.13   0.31   0.18     0.03  -0.42  -0.23    -0.02  -0.33   0.61
   4   1    -0.13  -0.15   0.14     0.12   0.16  -0.10    -0.08   0.07  -0.02
   5   7     0.06   0.00   0.00     0.00   0.03   0.00     0.00   0.00   0.00
   6   1    -0.51   0.00   0.00     0.00   0.03   0.00     0.01   0.00   0.00
   7   6     0.00   0.02  -0.01     0.00   0.03   0.00     0.01  -0.03   0.04
   8   1     0.14  -0.28   0.25     0.07  -0.33   0.32    -0.01   0.06   0.09
   9   1    -0.13   0.15  -0.14    -0.12   0.16  -0.10    -0.08  -0.07   0.02
  10   1    -0.13  -0.31  -0.18    -0.03  -0.42  -0.23    -0.02   0.33  -0.61
                    19                     20                     21
                     A                      A                      A
 Frequencies --  2927.9543              3048.1580              3048.3575
 Red. masses --     1.0630                 1.0731                 1.0706
 Frc consts  --     5.3690                 5.8744                 5.8615
 IR Inten    --   172.5029                24.6051                52.4100
 Atom AN      X      Y      Z        X      Y      Z        X      Y      Z
   1   6     0.01   0.02  -0.04     0.02   0.01   0.05    -0.02  -0.01  -0.05
   2   1    -0.01  -0.04  -0.07    -0.02  -0.42  -0.45     0.03   0.42   0.45
   3   1    -0.03  -0.33   0.61     0.00   0.06  -0.10    -0.01  -0.05   0.08
   4   1    -0.07   0.06  -0.02    -0.25   0.20  -0.01     0.26  -0.20   0.02
   5   7     0.00   0.00   0.00     0.00   0.00   0.00     0.00   0.00   0.00
   6   1     0.00   0.00   0.00     0.00   0.00   0.00     0.00  -0.01  -0.02
   7   6    -0.01   0.02  -0.04     0.02  -0.01  -0.05     0.02  -0.01  -0.05
   8   1     0.01  -0.04  -0.07    -0.02   0.42   0.45    -0.03   0.42   0.45
   9   1     0.07   0.06  -0.02    -0.25  -0.20   0.01    -0.26  -0.20   0.02
  10   1     0.03  -0.33   0.61     0.00  -0.06   0.10     0.01  -0.05   0.08
                    22                     23                     24
                     A                      A                      A
 Frequencies --  3095.7630              3096.5031              3525.0063
 Red. masses --     1.1007                 1.1004                 1.0743
 Frc consts  --     6.2153                 6.2164                 7.8653
 IR Inten    --    28.5654                37.0966                 0.0315
 Atom AN      X      Y      Z        X      Y      Z        X      Y      Z
   1   6    -0.04   0.05   0.01    -0.04   0.05   0.01     0.00   0.00   0.00
   2   1    -0.02  -0.21  -0.25    -0.02  -0.21  -0.24     0.00   0.01   0.01
   3   1    -0.01  -0.01   0.04    -0.01  -0.01   0.04     0.00   0.00   0.00
   4   1     0.49  -0.38   0.05     0.49  -0.38   0.05    -0.01   0.00   0.00
   5   7     0.00   0.00   0.00     0.00   0.00   0.00     0.00  -0.06  -0.04
   6   1    -0.01   0.00   0.00     0.00   0.02   0.02     0.00   0.78   0.62
   7   6    -0.04  -0.05  -0.01     0.04   0.05   0.01     0.00   0.00   0.00
   8   1    -0.02   0.21   0.25     0.02  -0.21  -0.24     0.00   0.01   0.01
   9   1     0.49   0.38  -0.05    -0.49  -0.38   0.05     0.01   0.00   0.00
  10   1    -0.01   0.01  -0.04     0.01  -0.01   0.04     0.00   0.00   0.00

 -------------------
 - Thermochemistry -
 -------------------
 Temperature   298.150 Kelvin.  Pressure   1.00000 Atm.
 Atom  1 has atomic number  6 and mass  12.00000
 Atom  2 has atomic number  1 and mass   1.00783
 Atom  3 has atomic number  1 and mass   1.00783
 Atom  4 has atomic number  1 and mass   1.00783
 Atom  5 has atomic number  7 and mass  14.00307
 Atom  6 has atomic number  1 and mass   1.00783
 Atom  7 has atomic number  6 and mass  12.00000
 Atom  8 has atomic number  1 and mass   1.00783
 Atom  9 has atomic number  1 and mass   1.00783
 Atom 10 has atomic number  1 and mass   1.00783
 Molecular mass:    45.05785 amu.
 Principal axes and moments of inertia in atomic units:
                           1         2         3
     EIGENVALUES --    51.69359 194.90530 220.44614
           X            1.00000   0.00000   0.00000
           Y            0.00000   0.99649   0.08373
           Z            0.00000  -0.08373   0.99649
 This molecule is an asymmetric top.
 Rotational symmetry number  1.
 Rotational temperatures (Kelvin)      1.67552     0.44439     0.39290
 Rotational constants (GHZ):          34.91228     9.25958     8.18677
 Zero-point vibrational energy     241791.0 (Joules/Mol)
                                   57.78945 (Kcal/Mol)
 Warning -- explicit consideration of   3 degrees of freedom as
           vibrations may cause significant error
 Vibrational temperatures:    337.68   378.91   552.60  1090.26  1349.70
          (Kelvin)           1492.20  1584.16  1678.75  1704.99  1823.98
                             2083.20  2119.61  2126.07  2141.69  2153.14
                             2186.34  2187.37  4205.68  4212.67  4385.61
                             4385.90  4454.11  4455.17  5071.69
 
 Zero-point correction=                           0.092093 (Hartree/Particle)
 Thermal correction to Energy=                    0.096508
 Thermal correction to Enthalpy=                  0.097452
 Thermal correction to Gibbs Free Energy=         0.066623
 Sum of electronic and zero-point Energies=           -135.124693
 Sum of electronic and thermal Energies=              -135.120278
 Sum of electronic and thermal Enthalpies=            -135.119334
 Sum of electronic and thermal Free Energies=         -135.150164
 
                     E (Thermal)             CV                S
                      KCal/Mol        Cal/Mol-Kelvin    Cal/Mol-Kelvin
 Total                   60.560             13.939             64.886
 Electronic               0.000              0.000              0.000
 Translational            0.889              2.981             37.342
 Rotational               0.889              2.981             22.323
 Vibrational             58.782              7.977              5.222
 Vibration  1             0.655              1.788              1.843
 Vibration  2             0.670              1.740              1.639
 Vibration  3             0.753              1.504              1.023
                       Q            Log10(Q)             Ln(Q)
 Total Bot       0.226817D-30        -30.644324        -70.561165
 Total V=0       0.519500D+12         11.715585         26.976132
 Vib (Bot)       0.113093D-41        -41.946563        -96.585531
 Vib (Bot)  1    0.837440D+00         -0.077046         -0.177406
 Vib (Bot)  2    0.736293D+00         -0.132949         -0.306127
 Vib (Bot)  3    0.469410D+00         -0.328448         -0.756278
 Vib (V=0)       0.259028D+01          0.413347          0.951766
 Vib (V=0)  1    0.147535D+01          0.168895          0.388895
 Vib (V=0)  2    0.139002D+01          0.143020          0.329315
 Vib (V=0)  3    0.118582D+01          0.074018          0.170433
 Electronic      0.100000D+01          0.000000          0.000000
 Translational   0.118881D+08          7.075111         16.291045
 Rotational      0.168705D+05          4.227128          9.733321
 ***** Axes restored to original set *****
 -------------------------------------------------------------------
 Center     Atomic                   Forces (Hartrees/Bohr)
 Number     Number              X              Y              Z
 -------------------------------------------------------------------
    1          6          -0.000000015    0.000001394    0.000001178
    2          1           0.000004156    0.000001757    0.000009069
    3          1          -0.000003471    0.000008609   -0.000001641
    4          1           0.000000239   -0.000003583   -0.000001711
    5          7           0.000002570   -0.000007077    0.000000116
    6          1          -0.000004936   -0.000009462   -0.000013561
    7          6           0.000000308    0.000001497    0.000000974
    8          1           0.000005184    0.000002122    0.000008432
    9          1           0.000000219   -0.000003582   -0.000001694
   10          1          -0.000004253    0.000008325   -0.000001161
 -------------------------------------------------------------------
 Cartesian Forces:  Max     0.000013561 RMS     0.000005084
 1\1\RECHENZENTRUM RWTH AACHEN-SRVMBFD\Freq\RB3LYP\TZVP\C2H7N1\JENS\03-
 Sep-2013\0\\# opt=(tight,calcall) freq b3lyp geom=connectivity tzvp\\T
 itle Card Required\\0,1\C,-1.6546439514,0.3339753331,0.0146983845\H,-1
 .3564840929,-0.7177164442,0.0279429912\H,-1.3118349545,0.7878537995,0.
 960303276\H,-2.7452349046,0.3658453006,-0.0056853223\N,-1.1218041119,0
 .9739456542,-1.1788255337\H,-1.5116812105,1.9032482228,-1.2775512785\C
 ,0.3319354489,1.038296616,-1.2007310551\H,0.7405068635,0.025749997,-1.
 2550362152\H,0.6637508861,1.5744640647,-2.0913728497\H,0.7744938987,1.
 5275421368,-0.3161559477\\Version=AM64L-G03RevE.01\State=1-A\HF=-135.2
 167866\RMSD=4.947e-09\RMSF=5.084e-06\ZeroPoint=0.0920933\Thermal=0.096
 5083\Dipole=0.0677829,0.2823544,0.2744088\DipoleDeriv=0.2126839,0.0565
 606,-0.0453067,0.1263582,0.3134907,-0.0845552,-0.0363265,-0.0125615,0.
 5744179,0.0473586,0.0847461,-0.0092405,0.0317528,-0.1565946,0.0275682,
 0.0318302,-0.0140786,0.02042,-0.0007953,-0.052745,-0.1023543,-0.062576
 3,-0.0348925,-0.1078702,0.014455,-0.0311374,-0.2722906,-0.1777457,-0.0
 159942,0.0338799,0.0109785,0.0702817,0.0053496,-0.0021069,0.0274989,0.
 030489,-0.6028991,-0.1178695,-0.064889,-0.1231537,-0.2756849,-0.010465
 3,-0.0679514,-0.0018277,-0.7171114,0.101734,0.0110859,0.0837814,0.0669
 962,0.0028342,0.0796186,0.1161806,-0.0117651,0.2374809,0.5643905,0.079
 6257,0.0802992,-0.0114683,0.228594,0.1205928,0.0589782,0.0834068,0.307
 608,-0.0091304,0.0327678,0.0093369,0.1051641,-0.1418952,-0.0230128,-0.
 0204902,-0.0130797,0.0622098,-0.0058498,-0.0260892,0.0466496,-0.068076
 1,0.017068,0.0955306,0.0739359,0.0979219,-0.0881933,-0.1297469,-0.0520
 882,-0.0321565,-0.0759754,-0.0232014,-0.1027564,-0.168505,-0.1243777,-
 0.1550302\Polar=36.8860135,1.2004803,32.8858285,-1.918373,-1.282679,34
 .6065224\PG=C01 [X(C2H7N1)]\NImag=0\\0.58516730,-0.02583771,0.55300578
 ,0.01959049,0.01625176,0.47446480,-0.07079006,0.07223184,0.00055168,0.
 06960379,0.06940378,-0.28133792,-0.00397042,-0.07534429,0.30981405,0.0
 0330759,-0.01003331,-0.04777896,-0.00346240,-0.00234714,0.05693426,-0.
 07849398,-0.03392690,-0.06149779,0.00350638,0.00445232,0.00783658,0.07
 545380,-0.03401460,-0.09791634,-0.08283911,-0.01142380,-0.01404508,-0.
 02599127,0.03798759,0.09927655,-0.06268867,-0.08465280,-0.20036380,-0.
 00099146,-0.00247209,-0.00005964,0.06689065,0.08928772,0.23525088,-0.3
 0866984,0.01035264,-0.00928883,-0.00756044,0.00066519,-0.00093558,-0.0
 0942851,0.00084458,-0.00168793,0.33653191,0.01426007,-0.04898706,0.000
 40611,0.03099063,0.00066230,0.00123977,-0.01520076,0.00077620,-0.00119
 614,-0.00963336,0.04808306,-0.01719223,0.00156190,-0.04968904,0.000642
 12,-0.00060259,-0.00046218,-0.02640254,0.00193870,-0.00005416,0.006882
 01,-0.00438878,0.05526258,-0.10712544,-0.00379987,0.05514686,0.0039080
 4,0.00365804,-0.00951012,0.00419097,0.00314040,-0.00005080,-0.01201687
 ,-0.01865444,0.03386774,0.49930593,-0.00826012,-0.11027426,0.07867954,
 -0.01312004,-0.01554017,0.03382538,0.00433262,0.01020645,-0.00094944,0
 .00046337,0.00002435,-0.00217338,-0.11465182,0.56508287,0.02836968,0.0
 4093771,-0.16293788,0.00156607,0.00881917,-0.00592404,0.01301751,0.017
 90762,-0.03822771,0.00245834,0.00147054,-0.00237147,-0.06674659,-0.149
 38714,0.30383172,0.00682894,-0.01544710,0.00115060,-0.00047047,-0.0028
 2067,0.00361978,-0.00026137,0.00042390,0.00044955,0.00015749,-0.000281
 24,-0.00031745,-0.10284373,0.12175992,-0.00143265,0.12142564,0.0050688
 7,-0.01643903,-0.00395991,-0.00231900,-0.00024553,0.00392821,0.0005481
 4,0.00149898,-0.00044224,-0.00059821,0.00031966,-0.00018450,0.14428260
 ,-0.36566971,0.05799832,-0.14005075,0.37557123,-0.01089892,0.03358130,
 -0.00968394,0.00231027,0.00126166,-0.00370375,-0.00074083,0.00047194,0
 .00024363,-0.00002519,-0.00067713,0.00129234,0.01161888,0.02118574,-0.
 02753103,-0.00094933,-0.05319831,0.03997370,-0.02435597,-0.00967422,0.
 00282251,0.00149070,0.00144550,-0.00141367,0.00423266,0.00271908,-0.00
 517584,0.00124421,-0.00057445,0.00055214,-0.21570363,0.01334291,0.0207
 1597,-0.01976595,-0.00627132,-0.00439883,0.47298499,-0.02008813,-0.000
 36693,-0.00317782,-0.00203633,0.00044873,0.00045847,0.00219949,0.00103
 232,-0.00011115,-0.00211460,-0.00175653,0.00340071,-0.01193470,-0.0918
 5113,0.01964903,0.03811438,0.00187303,-0.00265296,-0.01269668,0.576424
 89,0.03683974,0.00251120,-0.00954487,-0.00044971,-0.00058990,0.0009701
 6,0.00336615,0.00100933,0.00176314,0.00282678,0.00277632,-0.00413692,-
 0.01812457,0.01593253,-0.07278283,-0.00261623,-0.00412606,-0.00140110,
 -0.01863203,-0.02967358,0.56322804,0.00137573,0.00215563,-0.00104914,0
 .00028961,-0.00100683,0.00037086,-0.00019832,-0.00033174,0.00040075,0.
 00029291,-0.00023092,-0.00024783,-0.02275570,0.03506969,-0.00220243,-0
 .00699526,0.00003813,0.00261038,-0.07585886,0.07614619,0.00514343,0.09
 479993,-0.00072245,0.00118078,0.00049903,0.00078651,0.00010095,-0.0006
 8387,-0.00011157,-0.00045368,-0.00028504,0.00000837,0.00042871,-0.0001
 8060,0.00306321,0.00468568,0.00206326,-0.00150708,0.00187604,-0.000850
 93,0.08330564,-0.27438432,-0.01194682,-0.09304476,0.29409599,0.0002646
 8,-0.00153616,0.00035310,-0.00007861,0.00025398,0.00027544,-0.00011305
 ,-0.00015593,-0.00008120,-0.00014112,0.00010665,-0.00007461,0.00004922
 ,0.00194734,0.00051385,0.00011475,-0.00017193,0.00069947,0.00489746,-0
 .01296343,-0.04966380,-0.00342422,0.01396068,0.04745621,-0.00673154,0.
 00181376,-0.00132281,0.00017790,-0.00022210,-0.00028972,0.00000357,0.0
 0017017,0.00025539,-0.00083569,-0.00098808,0.00176321,-0.01537994,-0.0
 2173317,0.03070952,0.00123575,0.00039919,0.00051743,-0.06798507,-0.032
 23727,0.05420679,0.00382231,0.00444351,-0.01009051,0.08151333,-0.00012
 494,0.00079814,-0.00069996,0.00010122,0.00047921,-0.00017419,-0.000047
 26,0.00003315,0.00031433,-0.00005822,0.00035936,0.00028560,-0.00010035
 ,-0.00084432,-0.00059456,-0.00024597,0.00055024,-0.00027243,-0.0374231
 3,-0.11266391,0.10674646,-0.00878755,-0.01353180,0.02480019,0.04196495
 ,0.11672535,0.00072087,-0.00067297,0.00128417,-0.00013431,-0.00002429,
 -0.00001009,-0.00032262,-0.00005413,0.00051051,0.00005112,0.00024750,0
 .00006100,0.00075755,-0.00106143,0.00186029,0.00061951,-0.00022865,-0.
 00001653,0.06136935,0.10768027,-0.22669694,-0.00176228,-0.00129761,0.0
 0234918,-0.06741787,-0.11761692,0.24163887,0.00279486,0.00213193,-0.00
 610357,-0.00015547,-0.00023093,0.00047667,0.00099481,0.00048442,0.0025
 9837,0.00028482,0.00031256,0.00045282,-0.03157963,-0.01720336,-0.02645
 543,0.00068895,-0.00109764,-0.00004385,-0.07628309,-0.03535234,-0.0625
 6034,0.00522765,0.00377862,0.00852138,0.00417939,0.00472125,0.00611869
 ,0.09384771,0.00031523,0.00033683,-0.00118921,0.00013328,-0.00033652,-
 0.00022206,-0.00023366,-0.00040855,0.00050685,0.00007025,0.00008994,0.
 00034294,-0.00500306,0.00418024,0.00113605,0.00005461,0.00066511,0.001
 15112,-0.03417333,-0.09875615,-0.08263948,-0.01000784,-0.01399834,-0.0
 2624139,0.00638904,0.00809459,0.01302823,0.04245550,0.10013286,0.00168
 677,0.00205136,0.00389641,0.00004634,-0.00032837,-0.00024121,-0.002034
 06,-0.00157488,0.00101835,-0.00013961,0.00001516,0.00017246,-0.0070081
 7,0.00200086,0.00356910,-0.00063853,0.00038506,0.00012720,-0.06073706,
 -0.08260953,-0.20173488,0.00016049,-0.00127809,-0.00182764,-0.00833143
 ,-0.01278852,-0.02098046,0.07699526,0.09412695,0.21600066\\0.00000002,
 -0.00000139,-0.00000118,-0.00000416,-0.00000176,-0.00000907,0.00000347
 ,-0.00000861,0.00000164,-0.00000024,0.00000358,0.00000171,-0.00000257,
 0.00000708,-0.00000012,0.00000494,0.00000946,0.00001356,-0.00000031,-0
 .00000150,-0.00000097,-0.00000518,-0.00000212,-0.00000843,-0.00000022,
 0.00000358,0.00000169,0.00000425,-0.00000833,0.00000116\\\@


 THERE'S A SUCKER BORN EVERY MINUTE

              -- PHINEAS TAYLOR (P.T.) BARNUM
 Job cpu time:  0 days  0 hours 24 minutes 56.0 seconds.
 File lengths (MBytes):  RWF=     20 Int=      0 D2E=      0 Chk=      6 Scr=      1
 Normal termination of Gaussian 03 at Tue Sep  3 11:06:03 2013.
 Link1:  Proceeding to internal job step number  2.
 --------------------------------------------------------------
 #N Geom=AllCheck Guess=Read SCRF=Check GenChk RB3LYP/TZVP Freq
 --------------------------------------------------------------
 1/7=10,10=4,29=7,30=1,38=1,40=1,46=1/1,3;
 2/40=1/2;
 3/5=19,7=101,11=2,16=1,25=1,30=1,70=2,71=2,74=-5/1,2,3;
 4/5=1,7=1/1;
 5/5=2,38=6/2;
 8/6=4,10=90,11=11/1;
 11/6=1,8=1,9=11,15=111,16=1/1,2,10;
 10/6=1/2;
 6/7=2,8=2,9=2,10=2,18=1,28=1/1;
 7/8=1,10=1,25=1/1,2,3,16;
 1/10=4,30=1,46=1/3;
 99//99;
 -------------------
 Title Card Required
 -------------------
 Redundant internal coordinates taken from checkpoint file:
 DMA_geoopt_Freq.chk
 Charge =  0 Multiplicity = 1
 C,0,-1.6546439514,0.3339753331,0.0146983845
 H,0,-1.3564840929,-0.7177164442,0.0279429912
 H,0,-1.3118349545,0.7878537995,0.960303276
 H,0,-2.7452349046,0.3658453006,-0.0056853223
 N,0,-1.1218041119,0.9739456542,-1.1788255337
 H,0,-1.5116812105,1.9032482228,-1.2775512785
 C,0,0.3319354489,1.038296616,-1.2007310551
 H,0,0.7405068635,0.025749997,-1.2550362152
 H,0,0.6637508861,1.5744640647,-2.0913728497
 H,0,0.7744938987,1.5275421368,-0.3161559477
 Recover connectivity data from disk.

 GradGradGradGradGradGradGradGradGradGradGradGradGradGradGradGradGradGrad
 Berny optimization.
 Initialization pass.
                           ----------------------------
                           !    Initial Parameters    !
                           ! (Angstroms and Degrees)  !
 --------------------------                            --------------------------
 ! Name  Definition              Value          Derivative Info.                !
 --------------------------------------------------------------------------------
 ! R1    R(1,2)                  1.0932         calculate D2E/DX2 analytically  !
 ! R2    R(1,3)                  1.1035         calculate D2E/DX2 analytically  !
 ! R3    R(1,4)                  1.0912         calculate D2E/DX2 analytically  !
 ! R4    R(1,5)                  1.4553         calculate D2E/DX2 analytically  !
 ! R5    R(5,6)                  1.0126         calculate D2E/DX2 analytically  !
 ! R6    R(5,7)                  1.4553         calculate D2E/DX2 analytically  !
 ! R7    R(7,8)                  1.0932         calculate D2E/DX2 analytically  !
 ! R8    R(7,9)                  1.0912         calculate D2E/DX2 analytically  !
 ! R9    R(7,10)                 1.1035         calculate D2E/DX2 analytically  !
 ! A1    A(2,1,3)              107.4923         calculate D2E/DX2 analytically  !
 ! A2    A(2,1,4)              107.5113         calculate D2E/DX2 analytically  !
 ! A3    A(2,1,5)              109.4581         calculate D2E/DX2 analytically  !
 ! A4    A(3,1,4)              108.3286         calculate D2E/DX2 analytically  !
 ! A5    A(3,1,5)              114.0889         calculate D2E/DX2 analytically  !
 ! A6    A(4,1,5)              109.7398         calculate D2E/DX2 analytically  !
 ! A7    A(1,5,6)              110.0328         calculate D2E/DX2 analytically  !
 ! A8    A(1,5,7)              113.4232         calculate D2E/DX2 analytically  !
 ! A9    A(6,5,7)              110.0328         calculate D2E/DX2 analytically  !
 ! A10   A(5,7,8)              109.4581         calculate D2E/DX2 analytically  !
 ! A11   A(5,7,9)              109.7398         calculate D2E/DX2 analytically  !
 ! A12   A(5,7,10)             114.0889         calculate D2E/DX2 analytically  !
 ! A13   A(8,7,9)              107.5113         calculate D2E/DX2 analytically  !
 ! A14   A(8,7,10)             107.4923         calculate D2E/DX2 analytically  !
 ! A15   A(9,7,10)             108.3286         calculate D2E/DX2 analytically  !
 ! D1    D(2,1,5,6)            171.0111         calculate D2E/DX2 analytically  !
 ! D2    D(2,1,5,7)            -65.2559         calculate D2E/DX2 analytically  !
 ! D3    D(3,1,5,6)            -68.5148         calculate D2E/DX2 analytically  !
 ! D4    D(3,1,5,7)             55.2183         calculate D2E/DX2 analytically  !
 ! D5    D(4,1,5,6)             53.2479         calculate D2E/DX2 analytically  !
 ! D6    D(4,1,5,7)            176.981          calculate D2E/DX2 analytically  !
 ! D7    D(1,5,7,8)             65.2557         calculate D2E/DX2 analytically  !
 ! D8    D(1,5,7,9)           -176.9811         calculate D2E/DX2 analytically  !
 ! D9    D(1,5,7,10)           -55.2184         calculate D2E/DX2 analytically  !
 ! D10   D(6,5,7,8)           -171.0112         calculate D2E/DX2 analytically  !
 ! D11   D(6,5,7,9)            -53.248          calculate D2E/DX2 analytically  !
 ! D12   D(6,5,7,10)            68.5147         calculate D2E/DX2 analytically  !
 --------------------------------------------------------------------------------
 Trust Radius=3.00D-01 FncErr=1.00D-07 GrdErr=1.00D-07
 Number of steps in this run=   2 maximum allowed number of steps=   2.
 GradGradGradGradGradGradGradGradGradGradGradGradGradGradGradGradGradGrad

                          Input orientation:                          
 ---------------------------------------------------------------------
 Center     Atomic     Atomic              Coordinates (Angstroms)
 Number     Number      Type              X           Y           Z
 ---------------------------------------------------------------------
    1          6             0       -1.654644    0.333975    0.014698
    2          1             0       -1.356484   -0.717716    0.027943
    3          1             0       -1.311835    0.787854    0.960303
    4          1             0       -2.745235    0.365845   -0.005685
    5          7             0       -1.121804    0.973946   -1.178826
    6          1             0       -1.511681    1.903248   -1.277551
    7          6             0        0.331935    1.038297   -1.200731
    8          1             0        0.740507    0.025750   -1.255036
    9          1             0        0.663751    1.574464   -2.091373
   10          1             0        0.774494    1.527542   -0.316156
 ---------------------------------------------------------------------
                    Distance matrix (angstroms):
                    1          2          3          4          5
     1  C    0.000000
     2  H    1.093220   0.000000
     3  H    1.103491   1.771449   0.000000
     4  H    1.091247   1.761779   1.779287   0.000000
     5  N    1.455328   2.091192   2.155601   2.093220   0.000000
     6  H    2.037882   2.932210   2.508393   2.345827   1.012598
     7  C    2.433071   2.728366   2.726678   3.368873   1.455328
     8  H    2.728365   2.568297   3.114585   3.718459   2.091192
     9  H    3.368873   3.718459   3.719465   4.175169   2.093220
    10  H    2.726679   3.114588   2.555241   3.719465   2.155601
                    6          7          8          9         10
     6  H    0.000000
     7  C    2.037882   0.000000
     8  H    2.932210   1.093220   0.000000
     9  H    2.345828   1.091247   1.761779   0.000000
    10  H    2.508392   1.103491   1.771449   1.779287   0.000000
 Stoichiometry    C2H7N
 Framework group  C1[X(C2H7N)]
 Deg. of freedom    24
 Full point group                 C1
 Largest Abelian subgroup         C1      NOp   1
 Largest concise Abelian subgroup C1      NOp   1
                         Standard orientation:                         
 ---------------------------------------------------------------------
 Center     Atomic     Atomic              Coordinates (Angstroms)
 Number     Number      Type              X           Y           Z
 ---------------------------------------------------------------------
    1          6             0       -1.216536   -0.222019    0.020198
    2          1             0       -1.284149   -0.964296   -0.779543
    3          1             0       -1.277620   -0.762442    0.980356
    4          1             0       -2.087584    0.430088   -0.062568
    5          7             0        0.000000    0.559421   -0.145245
    6          1             0        0.000000    1.341582    0.497856
    7          6             0        1.216536   -0.222019    0.020198
    8          1             0        1.284148   -0.964297   -0.779541
    9          1             0        2.087585    0.430087   -0.062570
   10          1             0        1.277621   -0.762440    0.980357
 ---------------------------------------------------------------------
 Rotational constants (GHZ):     34.9122846      9.2595797      8.1867670
 Standard basis: TZVP (5D, 7F)
 There are    99 symmetry adapted basis functions of A   symmetry.
 Integral buffers will be    131072 words long.
 Raffenetti 2 integral format.
 Two-electron integral symmetry is turned on.
    99 basis functions,   161 primitive gaussians,   102 cartesian basis functions
    13 alpha electrons       13 beta electrons
       nuclear repulsion energy        84.0658798885 Hartrees.
 NAtoms=   10 NActive=   10 NUniq=   10 SFac= 7.50D-01 NAtFMM=   80 NAOKFM=F Big=F
 One-electron integrals computed using PRISM.
 NBasis=    99 RedAO= T  NBF=    99
 NBsUse=    99 1.00D-06 NBFU=    99
 Initial guess read from the checkpoint file:
 DMA_geoopt_Freq.chk
 Initial guess orbital symmetries:
       Occupied  (A) (A) (A) (A) (A) (A) (A) (A) (A) (A) (A) (A)
                 (A)
       Virtual   (A) (A) (A) (A) (A) (A) (A) (A) (A) (A) (A) (A)
                 (A) (A) (A) (A) (A) (A) (A) (A) (A) (A) (A) (A)
                 (A) (A) (A) (A) (A) (A) (A) (A) (A) (A) (A) (A)
                 (A) (A) (A) (A) (A) (A) (A) (A) (A) (A) (A) (A)
                 (A) (A) (A) (A) (A) (A) (A) (A) (A) (A) (A) (A)
                 (A) (A) (A) (A) (A) (A) (A) (A) (A) (A) (A) (A)
                 (A) (A) (A) (A) (A) (A) (A) (A) (A) (A) (A) (A)
                 (A) (A)
 Requested convergence on RMS density matrix=1.00D-08 within 128 cycles.
 Requested convergence on MAX density matrix=1.00D-06.
 Requested convergence on             energy=1.00D-06.
 No special actions if energy rises.
 Keep R1 integrals in memory in canonical form, NReq=    15680975.
 SCF Done:  E(RB+HF-LYP) =  -135.216786573     A.U. after    1 cycles
             Convg  =    0.2892D-08             -V/T =  2.0055
             S**2   =   0.0000
 Range of M.O.s used for correlation:     1    99
 NBasis=    99 NAE=    13 NBE=    13 NFC=     0 NFV=     0
 NROrb=     99 NOA=    13 NOB=    13 NVA=    86 NVB=    86

 **** Warning!!: The largest alpha MO coefficient is  0.12467735D+02

 Symmetrizing basis deriv contribution to polar:
 IMax=3 JMax=2 DiffMx= 0.00D+00
 G2DrvN: will do   11 centers at a time, making    1 passes doing MaxLOS=2.
 FoFDir/FoFCou used for L=0 through L=2.
 DoAtom=TTTTTTTTTT
          Differentiating once with respect to electric field.
                with respect to dipole field.
          Differentiating once with respect to nuclear coordinates.
          Store integrals in memory, NReq=    14622643.
          There are  33 degrees of freedom in the 1st order CPHF.
    30 vectors were produced by pass  0.
 AX will form  30 AO Fock derivatives at one time.
    30 vectors were produced by pass  1.
    30 vectors were produced by pass  2.
    30 vectors were produced by pass  3.
    30 vectors were produced by pass  4.
    11 vectors were produced by pass  5.
     3 vectors were produced by pass  6.
 Inv2:  IOpt= 1 Iter= 1 AM= 1.93D-15 Conv= 1.00D-12.
 Inverted reduced A of dimension  164 with in-core refinement.
 Isotropic polarizability for W=    0.000000       34.79 Bohr**3.
 End of Minotr Frequency-dependent properties file   721 does not exist.

 **********************************************************************

            Population analysis using the SCF density.

 **********************************************************************

 Orbital symmetries:
       Occupied  (A) (A) (A) (A) (A) (A) (A) (A) (A) (A) (A) (A)
                 (A)
       Virtual   (A) (A) (A) (A) (A) (A) (A) (A) (A) (A) (A) (A)
                 (A) (A) (A) (A) (A) (A) (A) (A) (A) (A) (A) (A)
                 (A) (A) (A) (A) (A) (A) (A) (A) (A) (A) (A) (A)
                 (A) (A) (A) (A) (A) (A) (A) (A) (A) (A) (A) (A)
                 (A) (A) (A) (A) (A) (A) (A) (A) (A) (A) (A) (A)
                 (A) (A) (A) (A) (A) (A) (A) (A) (A) (A) (A) (A)
                 (A) (A) (A) (A) (A) (A) (A) (A) (A) (A) (A) (A)
                 (A) (A)
 The electronic state is 1-A.
 Alpha  occ. eigenvalues --  -14.29896 -10.18561 -10.18559  -0.89972  -0.70228
 Alpha  occ. eigenvalues --   -0.62942  -0.49128  -0.44337  -0.43870  -0.38922
 Alpha  occ. eigenvalues --   -0.36852  -0.36621  -0.22374
 Alpha virt. eigenvalues --    0.03230   0.06950   0.07937   0.09972   0.11020
 Alpha virt. eigenvalues --    0.13053   0.13945   0.14725   0.18307   0.22089
 Alpha virt. eigenvalues --    0.22614   0.24000   0.29946   0.32600   0.32914
 Alpha virt. eigenvalues --    0.37043   0.39319   0.44332   0.44647   0.47107
 Alpha virt. eigenvalues --    0.47122   0.48229   0.49140   0.52407   0.53974
 Alpha virt. eigenvalues --    0.54665   0.60617   0.64737   1.14209   1.15038
 Alpha virt. eigenvalues --    1.23613   1.24853   1.25988   1.29314   1.31339
 Alpha virt. eigenvalues --    1.34803   1.38483   1.40821   1.48890   1.51302
 Alpha virt. eigenvalues --    1.53757   1.53853   1.58427   1.62949   1.70564
 Alpha virt. eigenvalues --    1.73426   1.77887   1.77921   1.79028   1.80164
 Alpha virt. eigenvalues --    1.84286   1.94647   1.96431   2.01409   2.04243
 Alpha virt. eigenvalues --    2.10022   2.17428   2.25184   2.25882   2.30402
 Alpha virt. eigenvalues --    2.31443   2.36048   2.44212   2.45696   2.49889
 Alpha virt. eigenvalues --    2.56973   2.57515   2.61547   2.65190   2.70662
 Alpha virt. eigenvalues --    2.71189   2.82961   2.91103   2.93244   3.05451
 Alpha virt. eigenvalues --    3.09224   3.25854   3.31462   3.33025   3.34661
 Alpha virt. eigenvalues --    3.37538   3.74007   3.85312  21.88980  21.98131
 Alpha virt. eigenvalues --   31.78612
          Condensed to atoms (all electrons):
              1          2          3          4          5          6
     1  C    4.910822   0.402660   0.404677   0.394296   0.311986  -0.053746
     2  H    0.402660   0.595390  -0.062265  -0.018593  -0.043259   0.010402
     3  H    0.404677  -0.062265   0.685963  -0.039943  -0.077852  -0.007700
     4  H    0.394296  -0.018593  -0.039943   0.568445  -0.032728  -0.006731
     5  N    0.311986  -0.043259  -0.077852  -0.032728   6.616465   0.380506
     6  H   -0.053746   0.010402  -0.007700  -0.006731   0.380506   0.541132
     7  C   -0.101804  -0.007380  -0.007589   0.013334   0.311985  -0.053746
     8  H   -0.007380   0.009899  -0.004947  -0.000026  -0.043259   0.010402
     9  H    0.013334  -0.000026  -0.000594  -0.000550  -0.032728  -0.006731
    10  H   -0.007589  -0.004947   0.024527  -0.000594  -0.077851  -0.007700
              7          8          9         10
     1  C   -0.101804  -0.007380   0.013334  -0.007589
     2  H   -0.007380   0.009899  -0.000026  -0.004947
     3  H   -0.007589  -0.004947  -0.000594   0.024527
     4  H    0.013334  -0.000026  -0.000550  -0.000594
     5  N    0.311985  -0.043259  -0.032728  -0.077851
     6  H   -0.053746   0.010402  -0.006731  -0.007700
     7  C    4.910822   0.402660   0.394296   0.404677
     8  H    0.402660   0.595390  -0.018593  -0.062265
     9  H    0.394296  -0.018593   0.568445  -0.039943
    10  H    0.404677  -0.062265  -0.039943   0.685962
 Mulliken atomic charges:
              1
     1  C   -0.267256
     2  H    0.118120
     3  H    0.085724
     4  H    0.123090
     5  N   -0.313266
     6  H    0.193911
     7  C   -0.267256
     8  H    0.118120
     9  H    0.123090
    10  H    0.085724
 Sum of Mulliken charges=   0.00000
 Atomic charges with hydrogens summed into heavy atoms:
              1
     1  C    0.059678
     2  H    0.000000
     3  H    0.000000
     4  H    0.000000
     5  N   -0.119355
     6  H    0.000000
     7  C    0.059678
     8  H    0.000000
     9  H    0.000000
    10  H    0.000000
 Sum of Mulliken charges=   0.00000
 APT atomic charges:
              1
     1  C    0.366864
     2  H   -0.029605
     3  H   -0.102660
     4  H   -0.025658
     5  N   -0.531898
     6  H    0.114016
     7  C    0.366864
     8  H   -0.029605
     9  H   -0.025658
    10  H   -0.102660
 Sum of APT charges=   0.00000
 APT Atomic charges with hydrogens summed into heavy atoms:
              1
     1  C    0.208941
     2  H    0.000000
     3  H    0.000000
     4  H    0.000000
     5  N   -0.417882
     6  H    0.000000
     7  C    0.208941
     8  H    0.000000
     9  H    0.000000
    10  H    0.000000
 Sum of APT charges=   0.00000
 Electronic spatial extent (au):  <R**2>=   205.7864
 Charge=     0.0000 electrons
 Dipole moment (field-independent basis, Debye):
    X=     0.0000    Y=    -0.1473    Z=     1.0047  Tot=     1.0155
 Quadrupole moment (field-independent basis, Debye-Ang):
   XX=   -19.9251   YY=   -20.7156   ZZ=   -22.1261
   XY=     0.0000   XZ=     0.0000   YZ=     2.1366
 Traceless Quadrupole moment (field-independent basis, Debye-Ang):
   XX=     0.9972   YY=     0.2067   ZZ=    -1.2038
   XY=     0.0000   XZ=     0.0000   YZ=     2.1366
 Octapole moment (field-independent basis, Debye-Ang**2):
  XXX=     0.0000  YYY=     3.5033  ZZZ=     0.7232  XYY=     0.0000
  XXY=     1.9836  XXZ=    -0.8565  XZZ=     0.0000  YZZ=    -0.6546
  YYZ=     1.5832  XYZ=     0.0000
 Hexadecapole moment (field-independent basis, Debye-Ang**3):
 XXXX=  -183.7513 YYYY=   -58.1175 ZZZZ=   -41.5974 XXXY=     0.0000
 XXXZ=     0.0000 YYYX=     0.0000 YYYZ=     4.9511 ZZZX=     0.0000
 ZZZY=     2.6900 XXYY=   -40.2209 XXZZ=   -39.3093 YYZZ=   -16.4694
 XXYZ=     0.6615 YYXZ=     0.0000 ZZXY=     0.0000
 N-N= 8.406587988853D+01 E-N=-4.819220700510D+02  KE= 1.344793193490D+02
  Exact polarizability:  38.485   0.000  33.613   0.000  -0.350  32.280
 Approx polarizability:  44.936   0.000  45.147   0.000  -0.287  43.194
 Full mass-weighted force constant matrix:
 Low frequencies ---  -32.7991  -18.8813   -0.0009    0.0000    0.0005   10.2304
 Low frequencies ---  234.7041  263.3628  384.0766
 Diagonal vibrational polarizability:
        1.5067538       6.2052312       3.6665721
 Harmonic frequencies (cm**-1), IR intensities (KM/Mole), Raman scattering
 activities (A**4/AMU), depolarization ratios for plane and unpolarized
 incident light, reduced masses (AMU), force constants (mDyne/A),
 and normal coordinates:
                     1                      2                      3
                     A                      A                      A
 Frequencies --   234.7030               263.3586               384.0751
 Red. masses --     1.0325                 1.2053                 2.1641
 Frc consts  --     0.0335                 0.0493                 0.1881
 IR Inten    --     0.1196                 3.1860                 7.1245
 Atom AN      X      Y      Z        X      Y      Z        X      Y      Z
   1   6     0.00   0.01   0.03     0.01   0.00   0.04    -0.17   0.06  -0.01
   2   1     0.20  -0.27   0.27    -0.28   0.18  -0.10    -0.38   0.12  -0.04
   3   1    -0.16   0.33   0.20     0.28  -0.21  -0.06    -0.39   0.07  -0.02
   4   1    -0.02  -0.06  -0.37     0.02   0.07   0.47     0.04   0.34  -0.02
   5   7     0.00   0.00   0.00     0.00  -0.01  -0.11     0.00  -0.18   0.04
   6   1     0.02   0.00   0.00     0.00   0.06  -0.19     0.00  -0.03  -0.15
   7   6     0.00  -0.01  -0.03    -0.01   0.00   0.04     0.17   0.06  -0.01
   8   1     0.20   0.27  -0.27     0.28   0.18  -0.10     0.38   0.12  -0.04
   9   1    -0.02   0.06   0.37    -0.02   0.07   0.47    -0.04   0.34  -0.02
  10   1    -0.16  -0.33  -0.20    -0.28  -0.21  -0.06     0.39   0.07  -0.02
                     4                      5                      6
                     A                      A                      A
 Frequencies --   757.7678               938.0919              1037.1319
 Red. masses --     1.2957                 2.2927                 1.1959
 Frc consts  --     0.4384                 1.1887                 0.7579
 IR Inten    --   130.5251                 3.4087                 8.7836
 Atom AN      X      Y      Z        X      Y      Z        X      Y      Z
   1   6     0.07   0.02  -0.01     0.19   0.07  -0.03    -0.01   0.08   0.03
   2   1     0.16   0.09  -0.09    -0.09   0.01   0.05     0.44   0.15  -0.08
   3   1    -0.03  -0.11  -0.08     0.11   0.20   0.06     0.08  -0.18  -0.10
   4   1     0.05  -0.01  -0.04     0.38   0.32  -0.01    -0.27  -0.29  -0.06
   5   7     0.00  -0.07   0.10     0.00  -0.16   0.01    -0.04   0.00   0.00
   6   1     0.00   0.57  -0.72     0.00  -0.41   0.31     0.34   0.00   0.00
   7   6    -0.07   0.02  -0.01    -0.19   0.07  -0.03    -0.01  -0.08  -0.03
   8   1    -0.16   0.09  -0.09     0.09   0.01   0.05     0.44  -0.15   0.08
   9   1    -0.05  -0.01  -0.04    -0.38   0.32  -0.01    -0.27   0.29   0.06
  10   1     0.03  -0.11  -0.08    -0.11   0.20   0.06     0.08   0.18   0.10
                     7                      8                      9
                     A                      A                      A
 Frequencies --  1101.0458              1166.7883              1185.0307
 Red. masses --     1.3246                 3.4787                 1.4633
 Frc consts  --     0.9461                 2.7903                 1.2108
 IR Inten    --     0.0111                32.0575                 7.1538
 Atom AN      X      Y      Z        X      Y      Z        X      Y      Z
   1   6    -0.02  -0.07   0.09    -0.20  -0.08  -0.03    -0.03   0.03  -0.10
   2   1     0.08   0.18  -0.16    -0.08  -0.22   0.10    -0.16  -0.27   0.19
   3   1    -0.49  -0.26  -0.05     0.20   0.00   0.02     0.42   0.24   0.06
   4   1     0.17   0.14  -0.20    -0.31  -0.23   0.12    -0.20  -0.15   0.21
   5   7     0.06   0.00   0.00     0.33   0.00   0.00     0.00  -0.04   0.11
   6   1     0.22   0.00   0.00     0.51   0.00   0.00     0.00   0.09  -0.06
   7   6    -0.02   0.07  -0.09    -0.20   0.08   0.03     0.03   0.03  -0.10
   8   1     0.08  -0.18   0.16    -0.08   0.22  -0.10     0.16  -0.27   0.19
   9   1     0.17  -0.14   0.20    -0.31   0.23  -0.12     0.20  -0.15   0.21
  10   1    -0.49   0.26   0.05     0.20   0.00  -0.02    -0.42   0.24   0.06
                    10                     11                     12
                     A                      A                      A
 Frequencies --  1267.7281              1447.8981              1473.2068
 Red. masses --     1.7146                 1.1552                 1.1641
 Frc consts  --     1.6236                 1.4269                 1.4885
 IR Inten    --     0.0944                 1.0198                 2.3581
 Atom AN      X      Y      Z        X      Y      Z        X      Y      Z
   1   6    -0.03   0.12   0.04     0.07   0.04   0.01    -0.07  -0.04  -0.01
   2   1     0.43   0.12   0.00    -0.39  -0.05   0.11     0.46  -0.05  -0.04
   3   1     0.19  -0.20  -0.12    -0.31  -0.13  -0.09     0.19   0.07   0.06
   4   1    -0.28  -0.23  -0.07    -0.25  -0.37  -0.04     0.24   0.38   0.17
   5   7     0.00  -0.15  -0.05     0.03   0.00   0.00     0.00   0.00   0.00
   6   1     0.00  -0.28   0.12    -0.11   0.00   0.00     0.00   0.03  -0.03
   7   6     0.03   0.12   0.04     0.07  -0.04  -0.01     0.07  -0.04  -0.01
   8   1    -0.43   0.12   0.00    -0.39   0.05  -0.11    -0.46  -0.05  -0.04
   9   1     0.28  -0.23  -0.07    -0.25   0.37   0.04    -0.24   0.38   0.17
  10   1    -0.19  -0.20  -0.12    -0.31   0.13   0.09    -0.19   0.07   0.06
                    13                     14                     15
                     A                      A                      A
 Frequencies --  1477.6928              1488.5517              1496.5119
 Red. masses --     1.1263                 1.0918                 1.0714
 Frc consts  --     1.4491                 1.4254                 1.4137
 IR Inten    --     7.6846                 2.2620                10.2014
 Atom AN      X      Y      Z        X      Y      Z        X      Y      Z
   1   6     0.03  -0.02  -0.05     0.02  -0.04   0.00    -0.03  -0.02   0.03
   2   1     0.12  -0.11   0.03    -0.29   0.22  -0.22    -0.18   0.15  -0.12
   3   1    -0.34   0.17   0.05     0.15   0.25   0.14     0.44  -0.02   0.04
   4   1    -0.01   0.00   0.45    -0.03  -0.12  -0.22     0.08   0.07  -0.47
   5   7    -0.05   0.00   0.00    -0.05   0.00   0.00     0.00   0.00   0.02
   6   1     0.48   0.00   0.00     0.54   0.00   0.00     0.00   0.03  -0.02
   7   6     0.03   0.02   0.05     0.02   0.04   0.00     0.03  -0.02   0.03
   8   1     0.12   0.11  -0.03    -0.29  -0.22   0.22     0.18   0.15  -0.12
   9   1    -0.01   0.00  -0.45    -0.03   0.12   0.22    -0.08   0.07  -0.47
  10   1    -0.34  -0.17  -0.05     0.15  -0.25  -0.14    -0.44  -0.02   0.04
                    16                     17                     18
                     A                      A                      A
 Frequencies --  1519.5852              1520.3013              2923.0953
 Red. masses --     1.0657                 1.0409                 1.0617
 Frc consts  --     1.4499                 1.4174                 5.3448
 IR Inten    --    13.2933                 2.2715                48.5714
 Atom AN      X      Y      Z        X      Y      Z        X      Y      Z
   1   6     0.00  -0.02   0.01     0.00   0.03   0.00     0.01   0.03  -0.04
   2   1     0.14   0.28  -0.25    -0.07  -0.33   0.32    -0.01  -0.06  -0.09
   3   1    -0.13   0.31   0.18     0.03  -0.42  -0.23    -0.02  -0.33   0.61
   4   1    -0.13  -0.15   0.14     0.12   0.16  -0.10    -0.08   0.07  -0.02
   5   7     0.06   0.00   0.00     0.00   0.03   0.00     0.00   0.00   0.00
   6   1    -0.51   0.00   0.00     0.00   0.03   0.00     0.01   0.00   0.00
   7   6     0.00   0.02  -0.01     0.00   0.03   0.00     0.01  -0.03   0.04
   8   1     0.14  -0.28   0.25     0.07  -0.33   0.32    -0.01   0.06   0.09
   9   1    -0.13   0.15  -0.14    -0.12   0.16  -0.10    -0.08  -0.07   0.02
  10   1    -0.13  -0.31  -0.18    -0.03  -0.42  -0.23    -0.02   0.33  -0.61
                    19                     20                     21
                     A                      A                      A
 Frequencies --  2927.9542              3048.1579              3048.3575
 Red. masses --     1.0630                 1.0731                 1.0706
 Frc consts  --     5.3690                 5.8744                 5.8615
 IR Inten    --   172.5030                24.6051                52.4101
 Atom AN      X      Y      Z        X      Y      Z        X      Y      Z
   1   6     0.01   0.02  -0.04     0.02   0.01   0.05    -0.02  -0.01  -0.05
   2   1    -0.01  -0.04  -0.07    -0.02  -0.42  -0.45     0.03   0.42   0.45
   3   1    -0.03  -0.33   0.61     0.00   0.06  -0.10    -0.01  -0.05   0.08
   4   1    -0.07   0.06  -0.02    -0.25   0.20  -0.01     0.26  -0.20   0.02
   5   7     0.00   0.00   0.00     0.00   0.00   0.00     0.00   0.00   0.00
   6   1     0.00   0.00   0.00     0.00   0.00   0.00     0.00  -0.01  -0.02
   7   6    -0.01   0.02  -0.04     0.02  -0.01  -0.05     0.02  -0.01  -0.05
   8   1     0.01  -0.04  -0.07    -0.02   0.42   0.45    -0.03   0.42   0.45
   9   1     0.07   0.06  -0.02    -0.25  -0.20   0.01    -0.26  -0.20   0.02
  10   1     0.03  -0.33   0.61     0.00  -0.06   0.10     0.01  -0.05   0.08
                    22                     23                     24
                     A                      A                      A
 Frequencies --  3095.7630              3096.5031              3525.0062
 Red. masses --     1.1007                 1.1004                 1.0743
 Frc consts  --     6.2153                 6.2164                 7.8653
 IR Inten    --    28.5654                37.0966                 0.0315
 Atom AN      X      Y      Z        X      Y      Z        X      Y      Z
   1   6    -0.04   0.05   0.01    -0.04   0.05   0.01     0.00   0.00   0.00
   2   1    -0.02  -0.21  -0.25    -0.02  -0.21  -0.24     0.00   0.01   0.01
   3   1    -0.01  -0.01   0.04    -0.01  -0.01   0.04     0.00   0.00   0.00
   4   1     0.49  -0.38   0.05     0.49  -0.38   0.05    -0.01   0.00   0.00
   5   7     0.00   0.00   0.00     0.00   0.00   0.00     0.00  -0.06  -0.04
   6   1    -0.01   0.00   0.00     0.00   0.02   0.02     0.00   0.78   0.62
   7   6    -0.04  -0.05  -0.01     0.04   0.05   0.01     0.00   0.00   0.00
   8   1    -0.02   0.21   0.25     0.02  -0.21  -0.24     0.00   0.01   0.01
   9   1     0.49   0.38  -0.05    -0.49  -0.38   0.05     0.01   0.00   0.00
  10   1    -0.01   0.01  -0.04     0.01  -0.01   0.04     0.00   0.00   0.00

 -------------------
 - Thermochemistry -
 -------------------
 Temperature   298.150 Kelvin.  Pressure   1.00000 Atm.
 Atom  1 has atomic number  6 and mass  12.00000
 Atom  2 has atomic number  1 and mass   1.00783
 Atom  3 has atomic number  1 and mass   1.00783
 Atom  4 has atomic number  1 and mass   1.00783
 Atom  5 has atomic number  7 and mass  14.00307
 Atom  6 has atomic number  1 and mass   1.00783
 Atom  7 has atomic number  6 and mass  12.00000
 Atom  8 has atomic number  1 and mass   1.00783
 Atom  9 has atomic number  1 and mass   1.00783
 Atom 10 has atomic number  1 and mass   1.00783
 Molecular mass:    45.05785 amu.
 Principal axes and moments of inertia in atomic units:
                           1         2         3
     EIGENVALUES --    51.69359 194.90530 220.44614
           X            1.00000   0.00000   0.00000
           Y            0.00000   0.99649   0.08373
           Z            0.00000  -0.08373   0.99649
 This molecule is an asymmetric top.
 Rotational symmetry number  1.
 Rotational temperatures (Kelvin)      1.67552     0.44439     0.39290
 Rotational constants (GHZ):          34.91228     9.25958     8.18677
 Zero-point vibrational energy     241791.0 (Joules/Mol)
                                   57.78945 (Kcal/Mol)
 Warning -- explicit consideration of   3 degrees of freedom as
           vibrations may cause significant error
 Vibrational temperatures:    337.68   378.91   552.60  1090.26  1349.70
          (Kelvin)           1492.20  1584.16  1678.75  1704.99  1823.98
                             2083.20  2119.61  2126.07  2141.69  2153.14
                             2186.34  2187.37  4205.68  4212.67  4385.61
                             4385.90  4454.11  4455.17  5071.69
 
 Zero-point correction=                           0.092093 (Hartree/Particle)
 Thermal correction to Energy=                    0.096508
 Thermal correction to Enthalpy=                  0.097452
 Thermal correction to Gibbs Free Energy=         0.066623
 Sum of electronic and zero-point Energies=           -135.124693
 Sum of electronic and thermal Energies=              -135.120278
 Sum of electronic and thermal Enthalpies=            -135.119334
 Sum of electronic and thermal Free Energies=         -135.150164
 
                     E (Thermal)             CV                S
                      KCal/Mol        Cal/Mol-Kelvin    Cal/Mol-Kelvin
 Total                   60.560             13.939             64.886
 Electronic               0.000              0.000              0.000
 Translational            0.889              2.981             37.342
 Rotational               0.889              2.981             22.323
 Vibrational             58.782              7.977              5.222
 Vibration  1             0.655              1.788              1.843
 Vibration  2             0.670              1.740              1.639
 Vibration  3             0.753              1.504              1.023
                       Q            Log10(Q)             Ln(Q)
 Total Bot       0.226817D-30        -30.644324        -70.561165
 Total V=0       0.519500D+12         11.715586         26.976133
 Vib (Bot)       0.113093D-41        -41.946563        -96.585531
 Vib (Bot)  1    0.837440D+00         -0.077046         -0.177406
 Vib (Bot)  2    0.736293D+00         -0.132949         -0.306127
 Vib (Bot)  3    0.469410D+00         -0.328448         -0.756278
 Vib (V=0)       0.259028D+01          0.413347          0.951766
 Vib (V=0)  1    0.147535D+01          0.168895          0.388895
 Vib (V=0)  2    0.139002D+01          0.143020          0.329315
 Vib (V=0)  3    0.118582D+01          0.074018          0.170433
 Electronic      0.100000D+01          0.000000          0.000000
 Translational   0.118881D+08          7.075111         16.291045
 Rotational      0.168705D+05          4.227128          9.733321
 ***** Axes restored to original set *****
 -------------------------------------------------------------------
 Center     Atomic                   Forces (Hartrees/Bohr)
 Number     Number              X              Y              Z
 -------------------------------------------------------------------
    1          6          -0.000000026    0.000001436    0.000001137
    2          1           0.000004161    0.000001728    0.000009074
    3          1          -0.000003472    0.000008602   -0.000001631
    4          1           0.000000255   -0.000003585   -0.000001704
    5          7           0.000002555   -0.000007010    0.000000130
    6          1          -0.000004913   -0.000009526   -0.000013560
    7          6           0.000000258    0.000001526    0.000000957
    8          1           0.000005200    0.000002097    0.000008431
    9          1           0.000000220   -0.000003590   -0.000001677
   10          1          -0.000004240    0.000008323   -0.000001159
 -------------------------------------------------------------------
 Cartesian Forces:  Max     0.000013560 RMS     0.000005083

 GradGradGradGradGradGradGradGradGradGradGradGradGradGradGradGradGradGrad
 Berny optimization.
 Internal  Forces:  Max     0.000001275 RMS     0.000000610
 Search for a local minimum.
 Step number   1 out of a maximum of   2
 All quantities printed in internal units (Hartrees-Bohrs-Radians)
 Second derivative matrix not updated -- analytic derivatives used.
     Eigenvalues ---    0.00350   0.00374   0.01937   0.06157   0.06165
     Eigenvalues ---    0.06252   0.06287   0.10479   0.12520   0.13218
     Eigenvalues ---    0.15314   0.16375   0.16766   0.17934   0.23793
     Eigenvalues ---    0.30209   0.30384   0.32863   0.33081   0.33482
     Eigenvalues ---    0.33605   0.36042   0.36836   0.444091000.00000
     Eigenvalues --- 1000.000001000.000001000.000001000.000001000.00000
     Eigenvalues --- 1000.000001000.000001000.000001000.000001000.00000
     Eigenvalues --- 1000.00000
 Angle between quadratic step and forces=   7.13 degrees.
 Linear search not attempted -- first point.
 Iteration  1 RMS(Cart)=  0.00016239 RMS(Int)=  0.00000001
 Iteration  2 RMS(Cart)=  0.00000002 RMS(Int)=  0.00000000
 Variable       Old X    -DE/DX   Delta X   Delta X   Delta X     New X
                                 (Linear)    (Quad)   (Total)
    R1        2.06589   0.00000   0.00000   0.00000   0.00000   2.06589
    R2        2.08530   0.00000   0.00000   0.00000   0.00000   2.08530
    R3        2.06216   0.00000   0.00000   0.00000   0.00000   2.06216
    R4        2.75017   0.00000   0.00000  -0.00001  -0.00001   2.75016
    R5        1.91353   0.00000   0.00000   0.00000   0.00000   1.91353
    R6        2.75017   0.00000   0.00000  -0.00001  -0.00001   2.75016
    R7        2.06589   0.00000   0.00000   0.00000   0.00000   2.06589
    R8        2.06216   0.00000   0.00000   0.00000   0.00000   2.06216
    R9        2.08530   0.00000   0.00000   0.00000   0.00000   2.08530
    A1        1.87609   0.00000   0.00000   0.00000   0.00000   1.87610
    A2        1.87643   0.00000   0.00000   0.00000   0.00000   1.87643
    A3        1.91040   0.00000   0.00000   0.00002   0.00002   1.91042
    A4        1.89069   0.00000   0.00000   0.00000   0.00000   1.89069
    A5        1.99123   0.00000   0.00000  -0.00001  -0.00001   1.99122
    A6        1.91532   0.00000   0.00000   0.00000   0.00000   1.91532
    A7        1.92044   0.00000   0.00000   0.00002   0.00002   1.92046
    A8        1.97961   0.00000   0.00000   0.00002   0.00002   1.97962
    A9        1.92044   0.00000   0.00000   0.00002   0.00002   1.92046
   A10        1.91040   0.00000   0.00000   0.00002   0.00002   1.91042
   A11        1.91532   0.00000   0.00000   0.00000   0.00000   1.91532
   A12        1.99123   0.00000   0.00000  -0.00001  -0.00001   1.99122
   A13        1.87643   0.00000   0.00000   0.00000   0.00000   1.87643
   A14        1.87609   0.00000   0.00000   0.00000   0.00000   1.87610
   A15        1.89069   0.00000   0.00000   0.00000   0.00000   1.89069
    D1        2.98471   0.00000   0.00000  -0.00032  -0.00032   2.98438
    D2       -1.13893   0.00000   0.00000  -0.00027  -0.00027  -1.13920
    D3       -1.19581   0.00000   0.00000  -0.00032  -0.00032  -1.19613
    D4        0.96374   0.00000   0.00000  -0.00026  -0.00026   0.96348
    D5        0.92935   0.00000   0.00000  -0.00033  -0.00033   0.92902
    D6        3.08890   0.00000   0.00000  -0.00028  -0.00028   3.08862
    D7        1.13893   0.00000   0.00000   0.00027   0.00027   1.13920
    D8       -3.08890   0.00000   0.00000   0.00028   0.00028  -3.08862
    D9       -0.96374   0.00000   0.00000   0.00027   0.00027  -0.96348
   D10       -2.98471   0.00000   0.00000   0.00033   0.00033  -2.98438
   D11       -0.92935   0.00000   0.00000   0.00033   0.00033  -0.92902
   D12        1.19581   0.00000   0.00000   0.00032   0.00032   1.19613
         Item               Value     Threshold  Converged?
 Maximum Force            0.000001     0.000015     YES
 RMS     Force            0.000001     0.000010     YES
 Maximum Displacement     0.000390     0.000060     NO 
 RMS     Displacement     0.000162     0.000040     NO 
 Predicted change in Energy=-1.886417D-09
 GradGradGradGradGradGradGradGradGradGradGradGradGradGradGradGradGradGrad

 1\1\RECHENZENTRUM RWTH AACHEN-SRVMBFD\Freq\RB3LYP\TZVP\C2H7N1\JENS\03-
 Sep-2013\0\\#N Geom=AllCheck Guess=Read SCRF=Check GenChk RB3LYP/TZVP 
 Freq\\Title Card Required\\0,1\C,-1.6546439514,0.3339753331,0.01469838
 45\H,-1.3564840929,-0.7177164442,0.0279429912\H,-1.3118349545,0.787853
 7995,0.960303276\H,-2.7452349046,0.3658453006,-0.0056853223\N,-1.12180
 41119,0.9739456542,-1.1788255337\H,-1.5116812105,1.9032482228,-1.27755
 12785\C,0.3319354489,1.038296616,-1.2007310551\H,0.7405068635,0.025749
 997,-1.2550362152\H,0.6637508861,1.5744640647,-2.0913728497\H,0.774493
 8987,1.5275421368,-0.3161559477\\Version=AM64L-G03RevE.01\State=1-A\HF
 =-135.2167866\RMSD=2.892e-09\RMSF=5.083e-06\ZeroPoint=0.0920933\Therma
 l=0.0965083\Dipole=0.0677824,0.2823552,0.2744083\DipoleDeriv=0.2126838
 ,0.0565606,-0.0453069,0.1263581,0.313491,-0.0845553,-0.0363263,-0.0125
 614,0.5744178,0.0473586,0.0847461,-0.0092405,0.0317528,-0.1565948,0.02
 75682,0.0318302,-0.0140785,0.02042,-0.0007953,-0.052745,-0.1023543,-0.
 0625763,-0.0348926,-0.1078702,0.014455,-0.0311374,-0.2722908,-0.177745
 7,-0.0159942,0.03388,0.0109785,0.0702817,0.0053496,-0.0021068,0.027499
 ,0.030489,-0.6028984,-0.1178694,-0.0648892,-0.1231537,-0.2756846,-0.01
 04656,-0.0679517,-0.0018279,-0.7171112,0.1017339,0.0110859,0.0837815,0
 .0669964,0.0028339,0.0796188,0.1161808,-0.0117651,0.237481,0.5643905,0
 .0796255,0.0802994,-0.0114684,0.2285942,0.120593,0.058978,0.0834069,0.
 3076079,-0.0091305,0.0327679,0.0093369,0.1051641,-0.1418953,-0.0230128
 ,-0.0204902,-0.0130797,0.0622097,-0.0058498,-0.0260891,0.0466496,-0.06
 80762,0.017068,0.0955306,0.0739359,0.0979219,-0.0881933,-0.129747,-0.0
 520882,-0.0321565,-0.0759754,-0.0232014,-0.1027564,-0.168505,-0.124377
 7,-0.1550302\Polar=36.8860176,1.2004809,32.885831,-1.918373,-1.2826791
 ,34.6065267\PG=C01 [X(C2H7N1)]\NImag=0\\0.58516730,-0.02583772,0.55300
 579,0.01959051,0.01625177,0.47446471,-0.07079005,0.07223183,0.00055168
 ,0.06960378,0.06940378,-0.28133791,-0.00397043,-0.07534430,0.30981404,
 0.00330759,-0.01003331,-0.04777895,-0.00346239,-0.00234714,0.05693424,
 -0.07849398,-0.03392690,-0.06149779,0.00350638,0.00445232,0.00783658,0
 .07545379,-0.03401460,-0.09791634,-0.08283911,-0.01142379,-0.01404508,
 -0.02599127,0.03798759,0.09927655,-0.06268868,-0.08465280,-0.20036378,
 -0.00099146,-0.00247208,-0.00005963,0.06689065,0.08928771,0.23525088,-
 0.30866983,0.01035264,-0.00928883,-0.00756043,0.00066519,-0.00093558,-
 0.00942851,0.00084458,-0.00168793,0.33653191,0.01426008,-0.04898707,0.
 00040610,0.03099063,0.00066230,0.00123977,-0.01520077,0.00077620,-0.00
 119614,-0.00963336,0.04808308,-0.01719224,0.00156190,-0.04968904,0.000
 64212,-0.00060259,-0.00046218,-0.02640254,0.00193870,-0.00005417,0.006
 88200,-0.00438878,0.05526259,-0.10712545,-0.00379985,0.05514685,0.0039
 0805,0.00365804,-0.00951013,0.00419097,0.00314040,-0.00005081,-0.01201
 688,-0.01865444,0.03386776,0.49930593,-0.00826011,-0.11027426,0.078679
 56,-0.01312003,-0.01554018,0.03382538,0.00433261,0.01020645,-0.0009494
 4,0.00046337,0.00002436,-0.00217338,-0.11465183,0.56508285,0.02836966,
 0.04093767,-0.16293781,0.00156607,0.00881917,-0.00592403,0.01301751,0.
 01790762,-0.03822773,0.00245835,0.00147055,-0.00237148,-0.06674660,-0.
 14938716,0.30383169,0.00682894,-0.01544711,0.00115061,-0.00047047,-0.0
 0282067,0.00361978,-0.00026137,0.00042389,0.00044955,0.00015749,-0.000
 28124,-0.00031745,-0.10284375,0.12175989,-0.00143265,0.12142568,0.0050
 6887,-0.01643904,-0.00395992,-0.00231900,-0.00024554,0.00392822,0.0005
 4814,0.00149898,-0.00044224,-0.00059821,0.00031966,-0.00018450,0.14428
 259,-0.36566967,0.05799836,-0.14005073,0.37557119,-0.01089893,0.033581
 34,-0.00968395,0.00231027,0.00126166,-0.00370375,-0.00074083,0.0004719
 4,0.00024363,-0.00002519,-0.00067713,0.00129234,0.01161889,0.02118573,
 -0.02753104,-0.00094934,-0.05319833,0.03997373,-0.02435597,-0.00967422
 ,0.00282249,0.00149070,0.00144550,-0.00141367,0.00423266,0.00271908,-0
 .00517584,0.00124421,-0.00057445,0.00055214,-0.21570357,0.01334295,0.0
 2071601,-0.01976596,-0.00627134,-0.00439884,0.47298491,-0.02008814,-0.
 00036693,-0.00317783,-0.00203633,0.00044873,0.00045846,0.00219949,0.00
 103232,-0.00011115,-0.00211460,-0.00175653,0.00340072,-0.01193471,-0.0
 9185114,0.01964904,0.03811441,0.00187303,-0.00265296,-0.01269671,0.576
 42490,0.03683975,0.00251120,-0.00954487,-0.00044971,-0.00058990,0.0009
 7016,0.00336615,0.00100933,0.00176314,0.00282679,0.00277632,-0.0041369
 2,-0.01812457,0.01593255,-0.07278283,-0.00261623,-0.00412606,-0.001401
 11,-0.01863205,-0.02967359,0.56322803,0.00137573,0.00215563,-0.0010491
 4,0.00028961,-0.00100683,0.00037086,-0.00019832,-0.00033174,0.00040075
 ,0.00029291,-0.00023092,-0.00024783,-0.02275570,0.03506970,-0.00220243
 ,-0.00699527,0.00003813,0.00261038,-0.07585885,0.07614619,0.00514343,0
 .09479991,-0.00072245,0.00118078,0.00049903,0.00078651,0.00010095,-0.0
 0068387,-0.00011157,-0.00045368,-0.00028504,0.00000837,0.00042871,-0.0
 0018060,0.00306321,0.00468567,0.00206326,-0.00150708,0.00187604,-0.000
 85094,0.08330564,-0.27438429,-0.01194682,-0.09304477,0.29409598,0.0002
 6468,-0.00153616,0.00035310,-0.00007861,0.00025398,0.00027544,-0.00011
 305,-0.00015593,-0.00008120,-0.00014112,0.00010665,-0.00007461,0.00004
 922,0.00194734,0.00051385,0.00011475,-0.00017193,0.00069947,0.00489746
 ,-0.01296343,-0.04966379,-0.00342421,0.01396068,0.04745619,-0.00673155
 ,0.00181376,-0.00132281,0.00017790,-0.00022210,-0.00028972,0.00000357,
 0.00017017,0.00025539,-0.00083569,-0.00098808,0.00176321,-0.01537996,-
 0.02173319,0.03070954,0.00123576,0.00039919,0.00051743,-0.06798507,-0.
 03223726,0.05420678,0.00382231,0.00444352,-0.01009052,0.08151334,-0.00
 012494,0.00079815,-0.00069996,0.00010122,0.00047921,-0.00017419,-0.000
 04726,0.00003315,0.00031433,-0.00005822,0.00035936,0.00028560,-0.00010
 035,-0.00084432,-0.00059456,-0.00024597,0.00055024,-0.00027244,-0.0374
 2313,-0.11266393,0.10674646,-0.00878755,-0.01353180,0.02480019,0.04196
 494,0.11672536,0.00072088,-0.00067297,0.00128417,-0.00013431,-0.000024
 29,-0.00001009,-0.00032262,-0.00005413,0.00051051,0.00005112,0.0002475
 0,0.00006100,0.00075755,-0.00106143,0.00186029,0.00061951,-0.00022865,
 -0.00001653,0.06136934,0.10768026,-0.22669694,-0.00176229,-0.00129761,
 0.00234918,-0.06741787,-0.11761691,0.24163887,0.00279486,0.00213193,-0
 .00610357,-0.00015547,-0.00023093,0.00047667,0.00099481,0.00048442,0.0
 0259838,0.00028482,0.00031256,0.00045282,-0.03157965,-0.01720337,-0.02
 645544,0.00068895,-0.00109764,-0.00004385,-0.07628307,-0.03535234,-0.0
 6256034,0.00522765,0.00377862,0.00852139,0.00417939,0.00472125,0.00611
 869,0.09384771,0.00031523,0.00033683,-0.00118921,0.00013328,-0.0003365
 2,-0.00022206,-0.00023366,-0.00040855,0.00050685,0.00007025,0.00008994
 ,0.00034294,-0.00500306,0.00418025,0.00113605,0.00005460,0.00066511,0.
 00115112,-0.03417332,-0.09875616,-0.08263948,-0.01000784,-0.01399834,-
 0.02624139,0.00638904,0.00809459,0.01302823,0.04245549,0.10013285,0.00
 168677,0.00205136,0.00389641,0.00004634,-0.00032837,-0.00024121,-0.002
 03406,-0.00157488,0.00101835,-0.00013961,0.00001516,0.00017246,-0.0070
 0818,0.00200085,0.00356909,-0.00063853,0.00038506,0.00012720,-0.060737
 05,-0.08260952,-0.20173487,0.00016049,-0.00127809,-0.00182763,-0.00833
 144,-0.01278852,-0.02098046,0.07699526,0.09412695,0.21600066\\0.000000
 03,-0.00000144,-0.00000114,-0.00000416,-0.00000173,-0.00000907,0.00000
 347,-0.00000860,0.00000163,-0.00000026,0.00000359,0.00000170,-0.000002
 56,0.00000701,-0.00000013,0.00000491,0.00000953,0.00001356,-0.00000026
 ,-0.00000153,-0.00000096,-0.00000520,-0.00000210,-0.00000843,-0.000000
 22,0.00000359,0.00000168,0.00000424,-0.00000832,0.00000116\\\@


 ...THOSE SCIENCES ARE VAIN AND FULL OF ERRORS WHICH 
 ARE NOT BORN FROM EXPERIMENT, THE MOTHER OF CERTAINTY...

                          -- LEONARDO DA VINCI, 1452-1519
 Job cpu time:  0 days  0 hours  3 minutes 44.4 seconds.
 File lengths (MBytes):  RWF=     20 Int=      0 D2E=      0 Chk=      6 Scr=      1
 Normal termination of Gaussian 03 at Tue Sep  3 11:08:31 2013.
