# Supplementary material for: CO from CO2and fluctuating renewable energy via formic-acid derivatives
Source: Royal Society of Chemistry journal article supplement (doi:10.1039/c6gc01202g), 2016-01-01
Supplement: c6gc01202g8.log [file c6gc01202g8.log]

 Entering Gaussian System, Link 0=/opt/mbfd/GAUSSIAN/LINUX64/g03.e01/g03
 Input=DMF_geoopt_Freq.com
 Output=DMF_geoopt_Freq.log
 Initial command:
 /opt/mbfd/GAUSSIAN/LINUX64/g03.e01/l1.exe /gaussianscratch/Gau-29116.inp -scrdir=/gaussianscratch/
 Entering Link 1 = /opt/mbfd/GAUSSIAN/LINUX64/g03.e01/l1.exe PID=     29120.
  
 Copyright (c) 1988,1990,1992,1993,1995,1998,2003,2004,2007, Gaussian, Inc.
                  All Rights Reserved.
  
 This is the Gaussian(R) 03 program.  It is based on the
 the Gaussian(R) 98 system (copyright 1998, Gaussian, Inc.),
 the Gaussian(R) 94 system (copyright 1995, Gaussian, Inc.),
 the Gaussian 92(TM) system (copyright 1992, Gaussian, Inc.),
 the Gaussian 90(TM) system (copyright 1990, Gaussian, Inc.),
 the Gaussian 88(TM) system (copyright 1988, Gaussian, Inc.),
 the Gaussian 86(TM) system (copyright 1986, Carnegie Mellon
 University), and the Gaussian 82(TM) system (copyright 1983,
 Carnegie Mellon University). Gaussian is a federally registered
 trademark of Gaussian, Inc.
  
 This software contains proprietary and confidential information,
 including trade secrets, belonging to Gaussian, Inc.
  
 This software is provided under written license and may be
 used, copied, transmitted, or stored only in accord with that
 written license.
  
 The following legend is applicable only to US Government
 contracts under FAR:
  
                    RESTRICTED RIGHTS LEGEND
  
 Use, reproduction and disclosure by the US Government is
 subject to restrictions as set forth in subparagraphs (a)
 and (c) of the Commercial Computer Software - Restricted
 Rights clause in FAR 52.227-19.
  
 Gaussian, Inc.
 340 Quinnipiac St., Bldg. 40, Wallingford CT 06492
  
  
 ---------------------------------------------------------------
 Warning -- This program may not be used in any manner that
 competes with the business of Gaussian, Inc. or will provide
 assistance to any competitor of Gaussian, Inc.  The licensee
 of this program is prohibited from giving any competitor of
 Gaussian, Inc. access to this program.  By using this program,
 the user acknowledges that Gaussian, Inc. is engaged in the
 business of creating and licensing software in the field of
 computational chemistry and represents and warrants to the
 licensee that it is not a competitor of Gaussian, Inc. and that
 it will not use this program in any manner prohibited above.
 ---------------------------------------------------------------
  

 Cite this work as:
 Gaussian 03, Revision E.01,
 M. J. Frisch, G. W. Trucks, H. B. Schlegel, G. E. Scuseria, 
 M. A. Robb, J. R. Cheeseman, J. A. Montgomery, Jr., T. Vreven, 
 K. N. Kudin, J. C. Burant, J. M. Millam, S. S. Iyengar, J. Tomasi, 
 V. Barone, B. Mennucci, M. Cossi, G. Scalmani, N. Rega, 
 G. A. Petersson, H. Nakatsuji, M. Hada, M. Ehara, K. Toyota, 
 R. Fukuda, J. Hasegawa, M. Ishida, T. Nakajima, Y. Honda, O. Kitao, 
 H. Nakai, M. Klene, X. Li, J. E. Knox, H. P. Hratchian, J. B. Cross, 
 V. Bakken, C. Adamo, J. Jaramillo, R. Gomperts, R. E. Stratmann, 
 O. Yazyev, A. J. Austin, R. Cammi, C. Pomelli, J. W. Ochterski, 
 P. Y. Ayala, K. Morokuma, G. A. Voth, P. Salvador, J. J. Dannenberg, 
 V. G. Zakrzewski, S. Dapprich, A. D. Daniels, M. C. Strain, 
 O. Farkas, D. K. Malick, A. D. Rabuck, K. Raghavachari, 
 J. B. Foresman, J. V. Ortiz, Q. Cui, A. G. Baboul, S. Clifford, 
 J. Cioslowski, B. B. Stefanov, G. Liu, A. Liashenko, P. Piskorz, 
 I. Komaromi, R. L. Martin, D. J. Fox, T. Keith, M. A. Al-Laham, 
 C. Y. Peng, A. Nanayakkara, M. Challacombe, P. M. W. Gill, 
 B. Johnson, W. Chen, M. W. Wong, C. Gonzalez, and J. A. Pople, 
 Gaussian, Inc., Wallingford CT, 2004.
 
 ******************************************
 Gaussian 03:  AM64L-G03RevE.01 11-Sep-2007
                 3-Sep-2013 
 ******************************************
 %chk=DMF_geoopt_Freq.chk
 %mem=2000MB
 %nproc=2
 Will use up to    2 processors via shared memory.
 Default route: MaxDisk=200000000
 -------------------------------------------------------
 # opt=(tight,calcall) freq b3lyp geom=connectivity tzvp
 -------------------------------------------------------
 1/7=10,10=4,14=-1,18=20,26=3,38=1,57=2/1,3;
 2/9=110,17=6,18=5,40=1/2;
 3/5=19,7=101,11=2,16=1,25=1,30=1,74=-5/1,2,3;
 4//1;
 5/5=2,38=5/2;
 8/6=4,10=90,11=11/1;
 11/6=1,8=1,9=11,15=111,16=1/1,2,10;
 10/6=1/2;
 6/7=2,8=2,9=2,10=2,18=1,28=1/1;
 7/10=1,25=1/1,2,3,16;
 1/10=4,14=-1,18=20/3(3);
 2/9=110/2;
 7/8=1,9=1,25=1,44=-1/16;
 99//99;
 2/9=110/2;
 3/5=19,7=101,11=2,16=1,25=1,30=1,74=-5/1,2,3;
 4/5=5,16=3/1;
 5/5=2,38=5/2;
 8/6=4,10=90,11=11/1;
 11/6=1,8=1,9=11,15=111,16=1/1,2,10;
 10/6=1/2;
 7/10=1,25=1/1,2,3,16;
 1/10=4,14=-1,18=20/3(-8);
 2/9=110/2;
 6/7=2,8=2,9=2,10=2,18=1,19=2,28=1/1;
 7/8=1,9=1,25=1,44=-1/16;
 99//99;
 -------------------
 Title Card Required
 -------------------
 Symbolic Z-matrix:
 Charge =  0 Multiplicity = 1
 C                    -2.96912  -0.81948   0. 
 H                    -2.61247  -1.82829   0. 
 H                    -2.61245  -0.31508   0.87365 
 H                    -4.03912  -0.81946   0. 
 N                    -2.47911  -0.12652  -1.20025 
 C                    -1.00912  -0.12421  -1.19891 
 H                    -0.65087  -1.13245  -1.19746 
 H                    -0.65244   0.37979  -2.07279 
 H                    -0.65404   0.38172  -0.32549 
 C                    -2.97129   1.25864  -1.20159 
 H                    -4.04129   1.25696  -1.20289 
 O                    -2.49427   1.93286  -2.36898 
 

 GradGradGradGradGradGradGradGradGradGradGradGradGradGradGradGradGradGrad
 Berny optimization.
 Initialization pass.
                           ----------------------------
                           !    Initial Parameters    !
                           ! (Angstroms and Degrees)  !
 --------------------------                            --------------------------
 ! Name  Definition              Value          Derivative Info.                !
 --------------------------------------------------------------------------------
 ! R1    R(1,2)                  1.07           calculate D2E/DX2 analytically  !
 ! R2    R(1,3)                  1.07           calculate D2E/DX2 analytically  !
 ! R3    R(1,4)                  1.07           calculate D2E/DX2 analytically  !
 ! R4    R(1,5)                  1.47           calculate D2E/DX2 analytically  !
 ! R5    R(5,6)                  1.47           calculate D2E/DX2 analytically  !
 ! R6    R(5,10)                 1.47           calculate D2E/DX2 analytically  !
 ! R7    R(6,7)                  1.07           calculate D2E/DX2 analytically  !
 ! R8    R(6,8)                  1.07           calculate D2E/DX2 analytically  !
 ! R9    R(6,9)                  1.07           calculate D2E/DX2 analytically  !
 ! R10   R(10,11)                1.07           calculate D2E/DX2 analytically  !
 ! R11   R(10,12)                1.43           calculate D2E/DX2 analytically  !
 ! A1    A(2,1,3)              109.4712         calculate D2E/DX2 analytically  !
 ! A2    A(2,1,4)              109.4712         calculate D2E/DX2 analytically  !
 ! A3    A(2,1,5)              109.4712         calculate D2E/DX2 analytically  !
 ! A4    A(3,1,4)              109.4712         calculate D2E/DX2 analytically  !
 ! A5    A(3,1,5)              109.4713         calculate D2E/DX2 analytically  !
 ! A6    A(4,1,5)              109.4712         calculate D2E/DX2 analytically  !
 ! A7    A(1,5,6)              109.4712         calculate D2E/DX2 analytically  !
 ! A8    A(1,5,10)             109.4712         calculate D2E/DX2 analytically  !
 ! A9    A(6,5,10)             109.4713         calculate D2E/DX2 analytically  !
 ! A10   A(5,6,7)              109.4712         calculate D2E/DX2 analytically  !
 ! A11   A(5,6,8)              109.4712         calculate D2E/DX2 analytically  !
 ! A12   A(5,6,9)              109.4712         calculate D2E/DX2 analytically  !
 ! A13   A(7,6,8)              109.4713         calculate D2E/DX2 analytically  !
 ! A14   A(7,6,9)              109.4712         calculate D2E/DX2 analytically  !
 ! A15   A(8,6,9)              109.4712         calculate D2E/DX2 analytically  !
 ! A16   A(5,10,11)            109.4712         calculate D2E/DX2 analytically  !
 ! A17   A(5,10,12)            109.4712         calculate D2E/DX2 analytically  !
 ! A18   A(11,10,12)           109.4713         calculate D2E/DX2 analytically  !
 ! D1    D(2,1,5,6)            -60.1111         calculate D2E/DX2 analytically  !
 ! D2    D(2,1,5,10)           179.8889         calculate D2E/DX2 analytically  !
 ! D3    D(3,1,5,6)             59.8889         calculate D2E/DX2 analytically  !
 ! D4    D(3,1,5,10)           -60.1111         calculate D2E/DX2 analytically  !
 ! D5    D(4,1,5,6)            179.8889         calculate D2E/DX2 analytically  !
 ! D6    D(4,1,5,10)            59.8889         calculate D2E/DX2 analytically  !
 ! D7    D(1,5,6,7)             59.9737         calculate D2E/DX2 analytically  !
 ! D8    D(1,5,6,8)            179.9737         calculate D2E/DX2 analytically  !
 ! D9    D(1,5,6,9)            -60.0263         calculate D2E/DX2 analytically  !
 ! D10   D(10,5,6,7)           179.9737         calculate D2E/DX2 analytically  !
 ! D11   D(10,5,6,8)           -60.0263         calculate D2E/DX2 analytically  !
 ! D12   D(10,5,6,9)            59.9737         calculate D2E/DX2 analytically  !
 ! D13   D(1,5,10,11)          -60.0178         calculate D2E/DX2 analytically  !
 ! D14   D(1,5,10,12)          179.9822         calculate D2E/DX2 analytically  !
 ! D15   D(6,5,10,11)          179.9823         calculate D2E/DX2 analytically  !
 ! D16   D(6,5,10,12)           59.9822         calculate D2E/DX2 analytically  !
 --------------------------------------------------------------------------------
 Trust Radius=3.00D-01 FncErr=1.00D-07 GrdErr=1.00D-06
 Number of steps in this run=  55 maximum allowed number of steps= 100.
 GradGradGradGradGradGradGradGradGradGradGradGradGradGradGradGradGradGrad

                          Input orientation:                          
 ---------------------------------------------------------------------
 Center     Atomic     Atomic              Coordinates (Angstroms)
 Number     Number      Type              X           Y           Z
 ---------------------------------------------------------------------
    1          6             0       -2.969121   -0.819477    0.000000
    2          1             0       -2.612467   -1.828287    0.000000
    3          1             0       -2.612448   -0.315079    0.873652
    4          1             0       -4.039121   -0.819464    0.000000
    5          7             0       -2.479113   -0.126519   -1.200250
    6          6             0       -1.009115   -0.124210   -1.198907
    7          1             0       -0.650865   -1.132453   -1.197465
    8          1             0       -0.652441    0.379788   -2.072789
    9          1             0       -0.654041    0.381718   -0.325489
   10          6             0       -2.971289    1.258638   -1.201595
   11          1             0       -4.041287    1.256956   -1.202885
   12          8             0       -2.494273    1.932862   -2.368976
 ---------------------------------------------------------------------
                    Distance matrix (angstroms):
                    1          2          3          4          5
     1  C    0.000000
     2  H    1.070000   0.000000
     3  H    1.070000   1.747302   0.000000
     4  H    1.070000   1.747303   1.747303   0.000000
     5  N    1.470000   2.086720   2.086720   2.086720   0.000000
     6  C    2.400500   2.629067   2.627281   3.331920   1.470000
     7  H    2.627962   2.401247   2.967395   3.607237   2.086720
     8  H    3.331921   3.607458   3.606381   4.147802   2.086720
     9  H    2.628385   2.970774   2.399755   3.606598   2.086720
    10  C    2.400500   3.331920   2.629068   2.627281   1.470000
    11  H    2.628316   3.606548   2.970670   2.399679   2.086720
    12  O    3.662362   4.446601   3.947383   3.946378   2.367952
                    6          7          8          9         10
     6  C    0.000000
     7  H    1.070000   0.000000
     8  H    1.070000   1.747303   0.000000
     9  H    1.070000   1.747303   1.747303   0.000000
    10  C    2.400500   3.331922   2.628386   2.627964   0.000000
    11  H    3.331922   4.147802   3.606998   3.606841   1.070000
    12  O    2.793975   3.763874   2.427367   3.157268   1.430000
                   11         12
    11  H    0.000000
    12  O    2.051796   0.000000
 Stoichiometry    C3H7NO
 Framework group  C1[X(C3H7NO)]
 Deg. of freedom    30
 Full point group                 C1
 Largest Abelian subgroup         C1      NOp   1
 Largest concise Abelian subgroup C1      NOp   1
                         Standard orientation:                         
 ---------------------------------------------------------------------
 Center     Atomic     Atomic              Coordinates (Angstroms)
 Number     Number      Type              X           Y           Z
 ---------------------------------------------------------------------
    1          6             0        1.611102   -0.688429    0.017849
    2          1             0        2.432636   -0.188737   -0.451501
    3          1             0        1.730280   -0.649982    1.080496
    4          1             0        1.585124   -1.709352   -0.301435
    5          7             0        0.354413   -0.025166   -0.358600
    6          6             0        0.389022    1.376698    0.082397
    7          1             0        1.210991    1.877457   -0.385050
    8          1             0       -0.525525    1.859605   -0.192022
    9          1             0        0.506790    1.413438    1.145262
   10          6             0       -0.774459   -0.713287    0.284080
   11          1             0       -0.799834   -1.733612   -0.037157
   12          8             0       -1.996918   -0.067819   -0.081794
 ---------------------------------------------------------------------
 Rotational constants (GHZ):      9.0218996      4.0330619      2.9820460
 Standard basis: TZVP (5D, 7F)
 There are   137 symmetry adapted basis functions of A   symmetry.
 Integral buffers will be    131072 words long.
 Raffenetti 2 integral format.
 Two-electron integral symmetry is turned on.
   137 basis functions,   231 primitive gaussians,   142 cartesian basis functions
    20 alpha electrons       20 beta electrons
       nuclear repulsion energy       177.9702205194 Hartrees.
 NAtoms=   12 NActive=   12 NUniq=   12 SFac= 7.50D-01 NAtFMM=   80 NAOKFM=F Big=F
 One-electron integrals computed using PRISM.
 NBasis=   137 RedAO= T  NBF=   137
 NBsUse=   137 1.00D-06 NBFU=   137
 Harris functional with IExCor=  402 diagonalized for initial guess.
 ExpMin= 9.52D-02 ExpMax= 2.70D+04 ExpMxC= 9.22D+02 IAcc=2 IRadAn=         4 AccDes= 0.00D+00
 HarFok:  IExCor= 402 AccDes= 0.00D+00 IRadAn=         4 IDoV=1
 ScaDFX=  1.000000  1.000000  1.000000  1.000000
 Initial guess orbital symmetries:
       Occupied  (A) (A) (A) (A) (A) (A) (A) (A) (A) (A) (A) (A)
                 (A) (A) (A) (A) (A) (A) (A) (A)
       Virtual   (A) (A) (A) (A) (A) (A) (A) (A) (A) (A) (A) (A)
                 (A) (A) (A) (A) (A) (A) (A) (A) (A) (A) (A) (A)
                 (A) (A) (A) (A) (A) (A) (A) (A) (A) (A) (A) (A)
                 (A) (A) (A) (A) (A) (A) (A) (A) (A) (A) (A) (A)
                 (A) (A) (A) (A) (A) (A) (A) (A) (A) (A) (A) (A)
                 (A) (A) (A) (A) (A) (A) (A) (A) (A) (A) (A) (A)
                 (A) (A) (A) (A) (A) (A) (A) (A) (A) (A) (A) (A)
                 (A) (A) (A) (A) (A) (A) (A) (A) (A) (A) (A) (A)
                 (A) (A) (A) (A) (A) (A) (A) (A) (A) (A) (A) (A)
                 (A) (A) (A) (A) (A) (A) (A) (A) (A)
 The electronic state of the initial guess is 1-A.
 Requested convergence on RMS density matrix=1.00D-08 within 128 cycles.
 Requested convergence on MAX density matrix=1.00D-06.
 Requested convergence on             energy=1.00D-06.
 No special actions if energy rises.
 Keep R1 integrals in memory in canonical form, NReq=    54018915.
 Integral accuracy reduced to 1.0D-05 until final iterations.
 EnCoef did     3 forward-backward iterations
 Initial convergence to 1.0D-05 achieved.  Increase integral accuracy.
 SCF Done:  E(RB+HF-LYP) =  -248.497574760     A.U. after   17 cycles
             Convg  =    0.6983D-08             -V/T =  2.0056
             S**2   =   0.0000
 Range of M.O.s used for correlation:     1   137
 NBasis=   137 NAE=    20 NBE=    20 NFC=     0 NFV=     0
 NROrb=    137 NOA=    20 NOB=    20 NVA=   117 NVB=   117

 **** Warning!!: The largest alpha MO coefficient is  0.12319699D+02

 Symmetrizing basis deriv contribution to polar:
 IMax=3 JMax=2 DiffMx= 0.00D+00
 G2DrvN: will do   13 centers at a time, making    1 passes doing MaxLOS=2.
 FoFDir/FoFCou used for L=0 through L=2.
 DoAtom=TTTTTTTTTTTT
          Differentiating once with respect to electric field.
                with respect to dipole field.
          Differentiating once with respect to nuclear coordinates.
          Store integrals in memory, NReq=    52370486.
          There are  39 degrees of freedom in the 1st order CPHF.
    36 vectors were produced by pass  0.
 AX will form  36 AO Fock derivatives at one time.
    36 vectors were produced by pass  1.
    36 vectors were produced by pass  2.
    36 vectors were produced by pass  3.
    36 vectors were produced by pass  4.
    24 vectors were produced by pass  5.
     3 vectors were produced by pass  6.
     1 vectors were produced by pass  7.
 Inv2:  IOpt= 1 Iter= 1 AM= 1.94D-15 Conv= 1.00D-12.
 Inverted reduced A of dimension  208 with in-core refinement.
 Isotropic polarizability for W=    0.000000       50.15 Bohr**3.
 End of Minotr Frequency-dependent properties file   721 does not exist.

 **********************************************************************

            Population analysis using the SCF density.

 **********************************************************************

 Orbital symmetries:
       Occupied  (A) (A) (A) (A) (A) (A) (A) (A) (A) (A) (A) (A)
                 (A) (A) (A) (A) (A) (A) (A) (A)
       Virtual   (A) (A) (A) (A) (A) (A) (A) (A) (A) (A) (A) (A)
                 (A) (A) (A) (A) (A) (A) (A) (A) (A) (A) (A) (A)
                 (A) (A) (A) (A) (A) (A) (A) (A) (A) (A) (A) (A)
                 (A) (A) (A) (A) (A) (A) (A) (A) (A) (A) (A) (A)
                 (A) (A) (A) (A) (A) (A) (A) (A) (A) (A) (A) (A)
                 (A) (A) (A) (A) (A) (A) (A) (A) (A) (A) (A) (A)
                 (A) (A) (A) (A) (A) (A) (A) (A) (A) (A) (A) (A)
                 (A) (A) (A) (A) (A) (A) (A) (A) (A) (A) (A) (A)
                 (A) (A) (A) (A) (A) (A) (A) (A) (A) (A) (A) (A)
                 (A) (A) (A) (A) (A) (A) (A) (A) (A)
 The electronic state is 1-A.
 Alpha  occ. eigenvalues --  -19.12089 -14.37109 -10.29144 -10.21132 -10.19920
 Alpha  occ. eigenvalues --   -0.98412  -0.91962  -0.73809  -0.69770  -0.59527
 Alpha  occ. eigenvalues --   -0.51264  -0.48872  -0.47672  -0.42847  -0.40730
 Alpha  occ. eigenvalues --   -0.40117  -0.38402  -0.34966  -0.26476  -0.25895
 Alpha virt. eigenvalues --   -0.11013   0.03007   0.06955   0.07506   0.08212
 Alpha virt. eigenvalues --    0.08620   0.11608   0.12640   0.14162   0.15290
 Alpha virt. eigenvalues --    0.16733   0.17170   0.20186   0.21032   0.23895
 Alpha virt. eigenvalues --    0.26826   0.29246   0.30400   0.31925   0.33530
 Alpha virt. eigenvalues --    0.34001   0.37057   0.38984   0.42244   0.43216
 Alpha virt. eigenvalues --    0.44445   0.45784   0.46819   0.47289   0.47956
 Alpha virt. eigenvalues --    0.50697   0.52323   0.54929   0.58934   0.60770
 Alpha virt. eigenvalues --    0.62458   0.62802   0.68128   0.82760   1.11644
 Alpha virt. eigenvalues --    1.14646   1.21830   1.23036   1.24664   1.26310
 Alpha virt. eigenvalues --    1.27701   1.29704   1.32228   1.34030   1.35263
 Alpha virt. eigenvalues --    1.37231   1.40927   1.44549   1.49515   1.51392
 Alpha virt. eigenvalues --    1.54347   1.54884   1.55914   1.61199   1.70138
 Alpha virt. eigenvalues --    1.75198   1.76864   1.77061   1.79336   1.80213
 Alpha virt. eigenvalues --    1.80762   1.81995   1.87315   1.90676   1.96311
 Alpha virt. eigenvalues --    1.99557   2.05173   2.09752   2.13783   2.16627
 Alpha virt. eigenvalues --    2.24976   2.27728   2.31509   2.34668   2.35571
 Alpha virt. eigenvalues --    2.37654   2.43452   2.43980   2.51322   2.54318
 Alpha virt. eigenvalues --    2.60040   2.63366   2.63648   2.65389   2.69026
 Alpha virt. eigenvalues --    2.69625   2.70245   2.72540   2.73868   2.76620
 Alpha virt. eigenvalues --    2.78443   2.82058   2.90366   3.00159   3.05656
 Alpha virt. eigenvalues --    3.08393   3.12596   3.13898   3.20992   3.27414
 Alpha virt. eigenvalues --    3.32362   3.35484   3.37071   3.38197   3.68108
 Alpha virt. eigenvalues --    3.71319   3.97081  21.71345  22.01424  22.07116
 Alpha virt. eigenvalues --   31.84882  43.37706
          Condensed to atoms (all electrons):
              1          2          3          4          5          6
     1  C    5.022214   0.390090   0.426648   0.400172   0.208165  -0.106620
     2  H    0.390090   0.546460  -0.039372  -0.015569  -0.025458  -0.007217
     3  H    0.426648  -0.039372   0.586673  -0.037770  -0.050193  -0.003867
     4  H    0.400172  -0.015569  -0.037770   0.538429  -0.038358   0.013534
     5  N    0.208165  -0.025458  -0.050193  -0.038358   6.859724   0.227400
     6  C   -0.106620  -0.007217  -0.003867   0.013534   0.227400   5.022542
     7  H   -0.005204   0.005667  -0.002661   0.000212  -0.036911   0.387088
     8  H    0.012824  -0.000039  -0.000954  -0.000309  -0.033976   0.392176
     9  H   -0.010849  -0.001626   0.014428  -0.000458  -0.053938   0.438866
    10  C   -0.053073   0.009966  -0.026368  -0.003080   0.269844  -0.054878
    11  H    0.002744  -0.000615   0.001485   0.003840  -0.073565   0.012409
    12  O    0.009716  -0.000591  -0.000169   0.000311  -0.117539  -0.009787
              7          8          9         10         11         12
     1  C   -0.005204   0.012824  -0.010849  -0.053073   0.002744   0.009716
     2  H    0.005667  -0.000039  -0.001626   0.009966  -0.000615  -0.000591
     3  H   -0.002661  -0.000954   0.014428  -0.026368   0.001485  -0.000169
     4  H    0.000212  -0.000309  -0.000458  -0.003080   0.003840   0.000311
     5  N   -0.036911  -0.033976  -0.053938   0.269844  -0.073565  -0.117539
     6  C    0.387088   0.392176   0.438866  -0.054878   0.012409  -0.009787
     7  H    0.573441  -0.014345  -0.047950   0.012650  -0.000326   0.002283
     8  H   -0.014345   0.477387  -0.029882  -0.011278   0.001203   0.025380
     9  H   -0.047950  -0.029882   0.586973  -0.019116   0.000891  -0.000467
    10  C    0.012650  -0.011278  -0.019116   4.939020   0.398053   0.407301
    11  H   -0.000326   0.001203   0.000891   0.398053   0.549855  -0.038474
    12  O    0.002283   0.025380  -0.000467   0.407301  -0.038474   8.092294
 Mulliken atomic charges:
              1
     1  C   -0.296828
     2  H    0.138303
     3  H    0.132119
     4  H    0.139046
     5  N   -0.135194
     6  C   -0.311647
     7  H    0.126055
     8  H    0.181813
     9  H    0.123129
    10  C    0.130960
    11  H    0.142501
    12  O   -0.370257
 Sum of Mulliken charges=   0.00000
 Atomic charges with hydrogens summed into heavy atoms:
              1
     1  C    0.112640
     2  H    0.000000
     3  H    0.000000
     4  H    0.000000
     5  N   -0.135194
     6  C    0.119351
     7  H    0.000000
     8  H    0.000000
     9  H    0.000000
    10  C    0.273461
    11  H    0.000000
    12  O   -0.370257
 Sum of Mulliken charges=   0.00000
 APT atomic charges:
              1
     1  C    0.298721
     2  H    0.004508
     3  H   -0.036206
     4  H   -0.001843
     5  N   -0.518522
     6  C    0.239552
     7  H    0.002635
     8  H    0.042658
     9  H   -0.028196
    10  C    0.508276
    11  H    0.084529
    12  O   -0.596111
 Sum of APT charges=   0.00000
 APT Atomic charges with hydrogens summed into heavy atoms:
              1
     1  C    0.265180
     2  H    0.000000
     3  H    0.000000
     4  H    0.000000
     5  N   -0.518522
     6  C    0.256649
     7  H    0.000000
     8  H    0.000000
     9  H    0.000000
    10  C    0.592804
    11  H    0.000000
    12  O   -0.596111
 Sum of APT charges=   0.00000
 Electronic spatial extent (au):  <R**2>=   444.1322
 Charge=     0.0000 electrons
 Dipole moment (field-independent basis, Debye):
    X=     4.1895    Y=    -0.6301    Z=     0.7923  Tot=     4.3101
 Quadrupole moment (field-independent basis, Debye-Ang):
   XX=   -37.8808   YY=   -27.5604   ZZ=   -32.2009
   XY=     0.4153   XZ=    -0.2590   YZ=    -0.0376
 Traceless Quadrupole moment (field-independent basis, Debye-Ang):
   XX=    -5.3334   YY=     4.9869   ZZ=     0.3465
   XY=     0.4153   XZ=    -0.2590   YZ=    -0.0376
 Octapole moment (field-independent basis, Debye-Ang**2):
  XXX=    19.2514  YYY=    -2.1342  ZZZ=     0.6784  XYY=    -1.6590
  XXY=     0.3899  XXZ=    -2.2249  XZZ=    -0.9462  YZZ=     0.4118
  YYZ=    -1.9765  XYZ=    -0.2467
 Hexadecapole moment (field-independent basis, Debye-Ang**3):
 XXXX=  -376.7620 YYYY=  -176.0783 ZZZZ=   -53.7360 XXXY=    -2.9388
 XXXZ=    -1.7890 YYYX=     1.2710 YYYZ=     1.5918 ZZZX=     2.1702
 ZZZY=     0.3893 XXYY=   -85.5899 XXZZ=   -65.3339 YYZZ=   -40.5372
 XXYZ=    -0.9938 YYXZ=    -0.5071 ZZXY=     0.2533
 N-N= 1.779702205194D+02 E-N=-9.358738157620D+02  KE= 2.471020574049D+02
  Exact polarizability:  64.064   0.304  48.503   0.475  -1.074  37.886
 Approx polarizability: 111.111  -5.120  65.193   3.261  -6.019  60.021
 ***** Axes restored to original set *****
 -------------------------------------------------------------------
 Center     Atomic                   Forces (Hartrees/Bohr)
 Number     Number              X              Y              Z
 -------------------------------------------------------------------
    1          6           0.001024552    0.001524355   -0.011332408
    2          1           0.002957258   -0.013032880   -0.000110948
    3          1           0.004412128    0.002427830    0.017460241
    4          1          -0.013906473   -0.001463685    0.000756761
    5          7          -0.000587873    0.058397721    0.050924335
    6          6          -0.006963264   -0.006268427   -0.013545734
    7          1           0.003994318   -0.013324202   -0.000291926
    8          1           0.003073070    0.005669765   -0.009043202
    9          1           0.008941482    0.005988411    0.012991372
   10          6           0.053040883   -0.020791319   -0.211126341
   11          1          -0.017873685    0.016599588    0.028071405
   12          8          -0.038112396   -0.035727155    0.135246444
 -------------------------------------------------------------------
 Cartesian Forces:  Max     0.211126341 RMS     0.046528668

 GradGradGradGradGradGradGradGradGradGradGradGradGradGradGradGradGradGrad
 Berny optimization.
 Internal  Forces:  Max     0.139963768 RMS     0.027351960
 Search for a local minimum.
 Step number   1 out of a maximum of  55
 All quantities printed in internal units (Hartrees-Bohrs-Radians)
 Second derivative matrix not updated -- analytic derivatives used.
     Eigenvalues ---    0.00190   0.00326   0.01010   0.03287   0.03455
     Eigenvalues ---    0.06191   0.06247   0.06334   0.06425   0.11074
     Eigenvalues ---    0.12815   0.13946   0.15209   0.15824   0.16494
     Eigenvalues ---    0.17249   0.17676   0.19099   0.20285   0.22084
     Eigenvalues ---    0.34753   0.35788   0.37496   0.37626   0.38017
     Eigenvalues ---    0.38187   0.38623   0.38926   0.39119   0.44969
     Eigenvalues --- 1000.000001000.000001000.000001000.000001000.00000
     Eigenvalues --- 1000.000001000.000001000.000001000.000001000.00000
     Eigenvalues --- 1000.000001000.000001000.000001000.000001000.00000
 RFO step:  Lambda=-1.37878315D-01.
 Linear search not attempted -- first point.
 Maximum step size (   0.300) exceeded in Quadratic search.
    -- Step size scaled by   0.379
 Iteration  1 RMS(Cart)=  0.04052154 RMS(Int)=  0.00630478
 Iteration  2 RMS(Cart)=  0.00648545 RMS(Int)=  0.00143581
 Iteration  3 RMS(Cart)=  0.00005030 RMS(Int)=  0.00143535
 Iteration  4 RMS(Cart)=  0.00000031 RMS(Int)=  0.00143535
 Variable       Old X    -DE/DX   Delta X   Delta X   Delta X     New X
                                 (Linear)    (Quad)   (Total)
    R1        2.02201   0.01327   0.00000   0.00943   0.00943   2.03143
    R2        2.02201   0.01687   0.00000   0.01293   0.01293   2.03493
    R3        2.02201   0.01391   0.00000   0.01007   0.01007   2.03208
    R4        2.77790   0.01233   0.00000   0.00595   0.00595   2.78385
    R5        2.77790   0.00903   0.00000   0.00425   0.00425   2.78215
    R6        2.77790  -0.03658   0.00000  -0.03631  -0.03631   2.74159
    R7        2.02201   0.01390   0.00000   0.00967   0.00967   2.03168
    R8        2.02201   0.01108   0.00000   0.00856   0.00856   2.03056
    R9        2.02201   0.01640   0.00000   0.01256   0.01256   2.03456
   R10        2.02201   0.01781   0.00000   0.01566   0.01566   2.03767
   R11        2.70231  -0.13996   0.00000  -0.22495  -0.22495   2.47736
    A1        1.91063  -0.00376   0.00000  -0.00437  -0.00438   1.90625
    A2        1.91063  -0.00204   0.00000  -0.00373  -0.00373   1.90690
    A3        1.91063  -0.00152   0.00000  -0.00137  -0.00138   1.90926
    A4        1.91063  -0.00274   0.00000  -0.00276  -0.00278   1.90785
    A5        1.91063   0.00966   0.00000   0.01185   0.01184   1.92247
    A6        1.91063   0.00040   0.00000   0.00038   0.00037   1.91100
    A7        1.91063   0.00126   0.00000   0.00490   0.00476   1.91539
    A8        1.91063   0.00340   0.00000   0.00966   0.00955   1.92018
    A9        1.91063   0.00828   0.00000   0.01056   0.01045   1.92109
   A10        1.91063  -0.00204   0.00000  -0.00263  -0.00263   1.90800
   A11        1.91063  -0.00161   0.00000  -0.00023  -0.00024   1.91039
   A12        1.91063   0.00603   0.00000   0.00881   0.00881   1.91944
   A13        1.91063   0.00055   0.00000  -0.00069  -0.00069   1.90994
   A14        1.91063  -0.00180   0.00000  -0.00226  -0.00225   1.90838
   A15        1.91063  -0.00113   0.00000  -0.00300  -0.00301   1.90763
   A16        1.91063   0.03261   0.00000   0.02923   0.02517   1.93580
   A17        1.91063   0.07246   0.00000   0.09411   0.09021   2.00085
   A18        1.91063  -0.00199   0.00000   0.05802   0.05167   1.96231
    D1       -1.04914   0.00445   0.00000   0.00657   0.00658  -1.04256
    D2        3.13965  -0.00855   0.00000  -0.01528  -0.01529   3.12436
    D3        1.04526   0.00482   0.00000   0.00763   0.00763   1.05289
    D4       -1.04914  -0.00818   0.00000  -0.01422  -0.01423  -1.06337
    D5        3.13965   0.00763   0.00000   0.01174   0.01176  -3.13177
    D6        1.04526  -0.00537   0.00000  -0.01010  -0.01011   1.03515
    D7        1.04674  -0.00376   0.00000  -0.00799  -0.00801   1.03873
    D8        3.14113  -0.00532   0.00000  -0.01059  -0.01061   3.13053
    D9       -1.04766  -0.00400   0.00000  -0.00901  -0.00902  -1.05668
   D10        3.14113   0.00626   0.00000   0.01330   0.01331  -3.12874
   D11       -1.04766   0.00470   0.00000   0.01070   0.01071  -1.03694
   D12        1.04674   0.00602   0.00000   0.01228   0.01230   1.05904
   D13       -1.04751   0.03195   0.00000   0.07527   0.07759  -0.96992
   D14        3.14128  -0.02996   0.00000  -0.07131  -0.07355   3.06773
   D15        3.14128   0.02324   0.00000   0.05689   0.05913  -3.08277
   D16        1.04689  -0.03866   0.00000  -0.08969  -0.09201   0.95488
         Item               Value     Threshold  Converged?
 Maximum Force            0.139964     0.000015     NO 
 RMS     Force            0.027352     0.000010     NO 
 Maximum Displacement     0.208816     0.000060     NO 
 RMS     Displacement     0.041408     0.000040     NO 
 Predicted change in Energy=-4.844615D-02
 GradGradGradGradGradGradGradGradGradGradGradGradGradGradGradGradGradGrad

                          Input orientation:                          
 ---------------------------------------------------------------------
 Center     Atomic     Atomic              Coordinates (Angstroms)
 Number     Number      Type              X           Y           Z
 ---------------------------------------------------------------------
    1          6             0       -2.972364   -0.807182   -0.002670
    2          1             0       -2.610938   -1.819440    0.014770
    3          1             0       -2.629021   -0.292938    0.878950
    4          1             0       -4.047608   -0.814657   -0.013932
    5          7             0       -2.472805   -0.130200   -1.211926
    6          6             0       -1.000559   -0.128719   -1.208784
    7          1             0       -0.643886   -1.142677   -1.185304
    8          1             0       -0.641214    0.356136   -2.097828
    9          1             0       -0.635124    0.397959   -0.343779
   10          6             0       -2.971940    1.231136   -1.261013
   11          1             0       -4.048615    1.248592   -1.204714
   12          8             0       -2.511507    1.946461   -2.258475
 ---------------------------------------------------------------------
                    Distance matrix (angstroms):
                    1          2          3          4          5
     1  C    0.000000
     2  H    1.074988   0.000000
     3  H    1.076841   1.754236   0.000000
     4  H    1.075329   1.753406   1.755511   0.000000
     5  N    1.473148   2.092223   2.103011   2.093723   0.000000
     6  C    2.408949   2.636085   2.652827   3.344053   1.472251
     7  H    2.633056   2.401557   2.987300   3.614558   2.090637
     8  H    3.343239   3.616076   3.637840   4.161357   2.091906
     9  H    2.651680   2.991531   2.438859   3.636521   2.099930
    10  C    2.395447   3.326253   2.649497   2.626317   1.450786
    11  H    2.613319   3.600955   2.955202   2.382218   2.093871
    12  O    3.589372   4.399947   3.856443   3.875739   2.325786
                    6          7          8          9         10
     6  C    0.000000
     7  H    1.075118   0.000000
     8  H    1.074528   1.754750   0.000000
     9  H    1.076645   1.755506   1.754558   0.000000
    10  C    2.395470   3.325741   2.626436   2.645035   0.000000
    11  H    3.344794   4.160615   3.633801   3.621699   1.078287
    12  O    2.773299   3.765963   2.460272   3.095921   1.310961
                   11         12
    11  H    0.000000
    12  O    1.990008   0.000000
 Stoichiometry    C3H7NO
 Framework group  C1[X(C3H7NO)]
 Deg. of freedom    30
 Full point group                 C1
 Largest Abelian subgroup         C1      NOp   1
 Largest concise Abelian subgroup C1      NOp   1
                         Standard orientation:                         
 ---------------------------------------------------------------------
 Center     Atomic     Atomic              Coordinates (Angstroms)
 Number     Number      Type              X           Y           Z
 ---------------------------------------------------------------------
    1          6             0        1.578349   -0.722945    0.047913
    2          1             0        2.431634   -0.242705   -0.395791
    3          1             0        1.675244   -0.698013    1.120095
    4          1             0        1.535779   -1.745650   -0.281627
    5          7             0        0.351359   -0.021264   -0.367182
    6          6             0        0.409791    1.383483    0.069620
    7          1             0        1.267738    1.857830   -0.371740
    8          1             0       -0.482067    1.893561   -0.245055
    9          1             0        0.487859    1.432165    1.142327
   10          6             0       -0.811365   -0.672853    0.205777
   11          1             0       -0.835744   -1.718137   -0.057829
   12          8             0       -1.950076   -0.069539   -0.034996
 ---------------------------------------------------------------------
 Rotational constants (GHZ):      9.0247095      4.1647691      3.0381802
 Standard basis: TZVP (5D, 7F)
 There are   137 symmetry adapted basis functions of A   symmetry.
 Integral buffers will be    131072 words long.
 Raffenetti 2 integral format.
 Two-electron integral symmetry is turned on.
   137 basis functions,   231 primitive gaussians,   142 cartesian basis functions
    20 alpha electrons       20 beta electrons
       nuclear repulsion energy       180.0663946457 Hartrees.
 NAtoms=   12 NActive=   12 NUniq=   12 SFac= 7.50D-01 NAtFMM=   80 NAOKFM=F Big=F
 One-electron integrals computed using PRISM.
 NBasis=   137 RedAO= T  NBF=   137
 NBsUse=   137 1.00D-06 NBFU=   137
 Initial guess read from the read-write file:
 Initial guess orbital symmetries:
       Occupied  (A) (A) (A) (A) (A) (A) (A) (A) (A) (A) (A) (A)
                 (A) (A) (A) (A) (A) (A) (A) (A)
       Virtual   (A) (A) (A) (A) (A) (A) (A) (A) (A) (A) (A) (A)
                 (A) (A) (A) (A) (A) (A) (A) (A) (A) (A) (A) (A)
                 (A) (A) (A) (A) (A) (A) (A) (A) (A) (A) (A) (A)
                 (A) (A) (A) (A) (A) (A) (A) (A) (A) (A) (A) (A)
                 (A) (A) (A) (A) (A) (A) (A) (A) (A) (A) (A) (A)
                 (A) (A) (A) (A) (A) (A) (A) (A) (A) (A) (A) (A)
                 (A) (A) (A) (A) (A) (A) (A) (A) (A) (A) (A) (A)
                 (A) (A) (A) (A) (A) (A) (A) (A) (A) (A) (A) (A)
                 (A) (A) (A) (A) (A) (A) (A) (A) (A) (A) (A) (A)
                 (A) (A) (A) (A) (A) (A) (A) (A) (A)
 Harris functional with IExCor=  402 diagonalized for initial guess.
 ExpMin= 9.52D-02 ExpMax= 2.70D+04 ExpMxC= 9.22D+02 IAcc=2 IRadAn=         4 AccDes= 0.00D+00
 HarFok:  IExCor= 402 AccDes= 0.00D+00 IRadAn=         4 IDoV=1
 ScaDFX=  1.000000  1.000000  1.000000  1.000000
 Requested convergence on RMS density matrix=1.00D-08 within 128 cycles.
 Requested convergence on MAX density matrix=1.00D-06.
 Requested convergence on             energy=1.00D-06.
 No special actions if energy rises.
 Keep R1 integrals in memory in canonical form, NReq=    54018915.
 Integral accuracy reduced to 1.0D-05 until final iterations.
 Initial convergence to 1.0D-05 achieved.  Increase integral accuracy.
 SCF Done:  E(RB+HF-LYP) =  -248.544137136     A.U. after   14 cycles
             Convg  =    0.6568D-08             -V/T =  2.0052
             S**2   =   0.0000
 Range of M.O.s used for correlation:     1   137
 NBasis=   137 NAE=    20 NBE=    20 NFC=     0 NFV=     0
 NROrb=    137 NOA=    20 NOB=    20 NVA=   117 NVB=   117

 **** Warning!!: The largest alpha MO coefficient is  0.10551053D+02

 Symmetrizing basis deriv contribution to polar:
 IMax=3 JMax=2 DiffMx= 0.00D+00
 G2DrvN: will do   13 centers at a time, making    1 passes doing MaxLOS=2.
 FoFDir/FoFCou used for L=0 through L=2.
 DoAtom=TTTTTTTTTTTT
          Differentiating once with respect to electric field.
                with respect to dipole field.
          Differentiating once with respect to nuclear coordinates.
          Store integrals in memory, NReq=    52370486.
          There are  39 degrees of freedom in the 1st order CPHF.
    36 vectors were produced by pass  0.
 AX will form  36 AO Fock derivatives at one time.
    36 vectors were produced by pass  1.
    36 vectors were produced by pass  2.
    36 vectors were produced by pass  3.
    36 vectors were produced by pass  4.
    23 vectors were produced by pass  5.
     4 vectors were produced by pass  6.
     1 vectors were produced by pass  7.
 Inv2:  IOpt= 1 Iter= 1 AM= 2.10D-15 Conv= 1.00D-12.
 Inverted reduced A of dimension  208 with in-core refinement.
 Isotropic polarizability for W=    0.000000       48.53 Bohr**3.
 End of Minotr Frequency-dependent properties file   721 does not exist.
 ***** Axes restored to original set *****
 -------------------------------------------------------------------
 Center     Atomic                   Forces (Hartrees/Bohr)
 Number     Number              X              Y              Z
 -------------------------------------------------------------------
    1          6           0.000950257    0.000704935   -0.009982722
    2          1           0.001746529   -0.009595446   -0.000001514
    3          1           0.003128902    0.001497768    0.013066098
    4          1          -0.010067443   -0.001251118    0.000534547
    5          7           0.002361789    0.045497838    0.047607938
    6          6          -0.006202758   -0.005712324   -0.011485293
    7          1           0.002927133   -0.009593845   -0.000284519
    8          1           0.002473654    0.003991547   -0.006638528
    9          1           0.006988789    0.004456804    0.009353076
   10          6           0.029175707   -0.017393621   -0.166460048
   11          1          -0.012944651    0.011295993    0.030163999
   12          8          -0.020537908   -0.023898532    0.094126966
 -------------------------------------------------------------------
 Cartesian Forces:  Max     0.166460048 RMS     0.035461587

 GradGradGradGradGradGradGradGradGradGradGradGradGradGradGradGradGradGrad
 Berny optimization.
 Internal  Forces:  Max     0.091868001 RMS     0.019944153
 Search for a local minimum.
 Step number   2 out of a maximum of  55
 All quantities printed in internal units (Hartrees-Bohrs-Radians)
 Second derivative matrix not updated -- analytic derivatives used.
 Trust test= 9.61D-01 RLast= 3.00D-01 DXMaxT set to 4.24D-01
     Eigenvalues ---    0.00195   0.00315   0.01001   0.03212   0.06090
     Eigenvalues ---    0.06190   0.06249   0.06319   0.06388   0.12621
     Eigenvalues ---    0.13139   0.14732   0.15455   0.16160   0.16838
     Eigenvalues ---    0.17422   0.18871   0.20418   0.23054   0.32603
     Eigenvalues ---    0.34347   0.35136   0.36140   0.36350   0.36903
     Eigenvalues ---    0.36978   0.37365   0.37907   0.38121   0.49769
     Eigenvalues --- 1000.000001000.000001000.000001000.000001000.00000
     Eigenvalues --- 1000.000001000.000001000.000001000.000001000.00000
     Eigenvalues --- 1000.000001000.000001000.000001000.000001000.00000
 RFO step:  Lambda=-7.60439254D-03.
 Quintic linear search produced a step of  1.25176.
 Iteration  1 RMS(Cart)=  0.05917602 RMS(Int)=  0.01782501
 Iteration  2 RMS(Cart)=  0.01972817 RMS(Int)=  0.00950667
 Iteration  3 RMS(Cart)=  0.00019622 RMS(Int)=  0.00950456
 Iteration  4 RMS(Cart)=  0.00000730 RMS(Int)=  0.00950456
 Iteration  5 RMS(Cart)=  0.00000030 RMS(Int)=  0.00950456
 Variable       Old X    -DE/DX   Delta X   Delta X   Delta X     New X
                                 (Linear)    (Quad)   (Total)
    R1        2.03143   0.00962   0.01180   0.00697   0.01877   2.05020
    R2        2.03493   0.01241   0.01618   0.00991   0.02609   2.06102
    R3        2.03208   0.01007   0.01261   0.00730   0.01991   2.05199
    R4        2.78385   0.00838   0.00745  -0.00644   0.00100   2.78485
    R5        2.78215   0.00616   0.00532  -0.00750  -0.00218   2.77997
    R6        2.74159  -0.02523  -0.04545  -0.06771  -0.11316   2.62843
    R7        2.03168   0.01002   0.01211   0.00706   0.01917   2.05085
    R8        2.03056   0.00812   0.01071   0.00547   0.01618   2.04675
    R9        2.03456   0.01207   0.01572   0.00951   0.02522   2.05979
   R10        2.03767   0.01468   0.01960   0.01123   0.03083   2.06850
   R11        2.47736  -0.09187  -0.28158   0.03825  -0.24334   2.23402
    A1        1.90625  -0.00297  -0.00548  -0.00298  -0.00849   1.89777
    A2        1.90690  -0.00181  -0.00467  -0.00518  -0.00987   1.89703
    A3        1.90926  -0.00107  -0.00172  -0.00133  -0.00307   1.90618
    A4        1.90785  -0.00214  -0.00348  -0.00152  -0.00514   1.90271
    A5        1.92247   0.00762   0.01482   0.00862   0.02335   1.94582
    A6        1.91100   0.00030   0.00046   0.00227   0.00265   1.91365
    A7        1.91539   0.00128   0.00596   0.02926   0.03114   1.94653
    A8        1.92018   0.00335   0.01195   0.03716   0.04533   1.96551
    A9        1.92109   0.00654   0.01309   0.04067   0.05016   1.97125
   A10        1.90800  -0.00154  -0.00330  -0.00215  -0.00545   1.90255
   A11        1.91039  -0.00100  -0.00030  -0.00153  -0.00184   1.90855
   A12        1.91944   0.00496   0.01103   0.00399   0.01502   1.93446
   A13        1.90994   0.00015  -0.00087   0.00298   0.00210   1.91204
   A14        1.90838  -0.00148  -0.00282   0.00044  -0.00237   1.90601
   A15        1.90763  -0.00111  -0.00376  -0.00372  -0.00749   1.90014
   A16        1.93580   0.01916   0.03150   0.01982   0.01716   1.95296
   A17        2.00085   0.05382   0.11292   0.05607   0.13578   2.13663
   A18        1.96231  -0.00005   0.06468   0.09424   0.12047   2.08277
    D1       -1.04256   0.00369   0.00823   0.02042   0.02893  -1.01363
    D2        3.12436  -0.00742  -0.01914  -0.07276  -0.09219   3.03218
    D3        1.05289   0.00407   0.00955   0.02125   0.03104   1.08394
    D4       -1.06337  -0.00704  -0.01782  -0.07193  -0.09007  -1.15344
    D5       -3.13177   0.00637   0.01472   0.02619   0.04124  -3.09053
    D6        1.03515  -0.00474  -0.01265  -0.06700  -0.07988   0.95527
    D7        1.03873  -0.00344  -0.01002  -0.03856  -0.04899   0.98974
    D8        3.13053  -0.00480  -0.01328  -0.03716  -0.05083   3.07969
    D9       -1.05668  -0.00372  -0.01129  -0.04023  -0.05190  -1.10858
   D10       -3.12874   0.00574   0.01666   0.05256   0.06960  -3.05914
   D11       -1.03694   0.00439   0.01341   0.05396   0.06776  -0.96919
   D12        1.05904   0.00546   0.01539   0.05090   0.06669   1.12572
   D13       -0.96992   0.03257   0.09712   0.10786   0.21403  -0.75589
   D14        3.06773  -0.03056  -0.09207  -0.08928  -0.18866   2.87907
   D15       -3.08277   0.02459   0.07402   0.02119   0.10252  -2.98025
   D16        0.95488  -0.03854  -0.11517  -0.17595  -0.30017   0.65471
         Item               Value     Threshold  Converged?
 Maximum Force            0.091868     0.000015     NO 
 RMS     Force            0.019944     0.000010     NO 
 Maximum Displacement     0.289219     0.000060     NO 
 RMS     Displacement     0.069151     0.000040     NO 
 Predicted change in Energy=-4.704247D-02
 GradGradGradGradGradGradGradGradGradGradGradGradGradGradGradGradGradGrad

                          Input orientation:                          
 ---------------------------------------------------------------------
 Center     Atomic     Atomic              Coordinates (Angstroms)
 Number     Number      Type              X           Y           Z
 ---------------------------------------------------------------------
    1          6             0       -2.984220   -0.781272   -0.001786
    2          1             0       -2.624466   -1.804614    0.018244
    3          1             0       -2.666713   -0.280369    0.913527
    4          1             0       -4.069341   -0.794552   -0.039722
    5          7             0       -2.454894   -0.104397   -1.199025
    6          6             0       -0.984143   -0.123909   -1.224277
    7          1             0       -0.643303   -1.152831   -1.170053
    8          1             0       -0.635015    0.325492   -2.145817
    9          1             0       -0.574477    0.434365   -0.382499
   10          6             0       -2.983261    1.170832   -1.370022
   11          1             0       -4.062361    1.193391   -1.187848
   12          8             0       -2.503387    1.962335   -2.105427
 ---------------------------------------------------------------------
                    Distance matrix (angstroms):
                    1          2          3          4          5
     1  C    0.000000
     2  H    1.084921   0.000000
     3  H    1.090647   1.768230   0.000000
     4  H    1.085865   1.763873   1.772127   0.000000
     5  N    1.473678   2.097913   2.130424   2.103981   0.000000
     6  C    2.434527   2.656933   2.725019   3.372148   1.471098
     7  H    2.642498   2.400391   3.032603   3.625430   2.093302
     8  H    3.367575   3.630211   3.722156   4.181474   2.095991
     9  H    2.725726   3.062038   2.562807   3.720458   2.119658
    10  C    2.383859   3.302923   2.724112   2.609981   1.390907
    11  H    2.543310   3.536982   2.921571   2.295683   2.065994
    12  O    3.490543   4.326032   3.764370   3.784148   2.257277
                    6          7          8          9         10
     6  C    0.000000
     7  H    1.085262   0.000000
     8  H    1.083091   1.771334   0.000000
     9  H    1.089993   1.773181   1.767712   0.000000
    10  C    2.386225   3.303755   2.613563   2.705518   0.000000
    11  H    3.348438   4.146689   3.663011   3.659241   1.094602
    12  O    2.727076   3.746878   2.484290   3.003975   1.182191
                   11         12
    11  H    0.000000
    12  O    1.965611   0.000000
 Stoichiometry    C3H7NO
 Framework group  C1[X(C3H7NO)]
 Deg. of freedom    30
 Full point group                 C1
 Largest Abelian subgroup         C1      NOp   1
 Largest concise Abelian subgroup C1      NOp   1
                         Standard orientation:                         
 ---------------------------------------------------------------------
 Center     Atomic     Atomic              Coordinates (Angstroms)
 Number     Number      Type              X           Y           Z
 ---------------------------------------------------------------------
    1          6             0        1.547644   -0.742751    0.084696
    2          1             0        2.422093   -0.270995   -0.351009
    3          1             0        1.652146   -0.739374    1.170320
    4          1             0        1.497138   -1.770299   -0.262719
    5          7             0        0.339865   -0.015047   -0.343607
    6          6             0        0.396864    1.402280    0.046348
    7          1             0        1.294245    1.847837   -0.370760
    8          1             0       -0.475494    1.915845   -0.338786
    9          1             0        0.416289    1.505422    1.131277
   10          6             0       -0.833966   -0.641959    0.061022
   11          1             0       -0.791688   -1.725090   -0.091274
   12          8             0       -1.882129   -0.095429    0.045727
 ---------------------------------------------------------------------
 Rotational constants (GHZ):      8.9536696      4.3797462      3.1208610
 Standard basis: TZVP (5D, 7F)
 There are   137 symmetry adapted basis functions of A   symmetry.
 Integral buffers will be    131072 words long.
 Raffenetti 2 integral format.
 Two-electron integral symmetry is turned on.
   137 basis functions,   231 primitive gaussians,   142 cartesian basis functions
    20 alpha electrons       20 beta electrons
       nuclear repulsion energy       183.3172958325 Hartrees.
 NAtoms=   12 NActive=   12 NUniq=   12 SFac= 7.50D-01 NAtFMM=   80 NAOKFM=F Big=F
 One-electron integrals computed using PRISM.
 NBasis=   137 RedAO= T  NBF=   137
 NBsUse=   137 1.00D-06 NBFU=   137
 Initial guess read from the read-write file:
 Initial guess orbital symmetries:
       Occupied  (A) (A) (A) (A) (A) (A) (A) (A) (A) (A) (A) (A)
                 (A) (A) (A) (A) (A) (A) (A) (A)
       Virtual   (A) (A) (A) (A) (A) (A) (A) (A) (A) (A) (A) (A)
                 (A) (A) (A) (A) (A) (A) (A) (A) (A) (A) (A) (A)
                 (A) (A) (A) (A) (A) (A) (A) (A) (A) (A) (A) (A)
                 (A) (A) (A) (A) (A) (A) (A) (A) (A) (A) (A) (A)
                 (A) (A) (A) (A) (A) (A) (A) (A) (A) (A) (A) (A)
                 (A) (A) (A) (A) (A) (A) (A) (A) (A) (A) (A) (A)
                 (A) (A) (A) (A) (A) (A) (A) (A) (A) (A) (A) (A)
                 (A) (A) (A) (A) (A) (A) (A) (A) (A) (A) (A) (A)
                 (A) (A) (A) (A) (A) (A) (A) (A) (A) (A) (A) (A)
                 (A) (A) (A) (A) (A) (A) (A) (A) (A)
 Harris functional with IExCor=  402 diagonalized for initial guess.
 ExpMin= 9.52D-02 ExpMax= 2.70D+04 ExpMxC= 9.22D+02 IAcc=2 IRadAn=         4 AccDes= 0.00D+00
 HarFok:  IExCor= 402 AccDes= 0.00D+00 IRadAn=         4 IDoV=1
 ScaDFX=  1.000000  1.000000  1.000000  1.000000
 Requested convergence on RMS density matrix=1.00D-08 within 128 cycles.
 Requested convergence on MAX density matrix=1.00D-06.
 Requested convergence on             energy=1.00D-06.
 No special actions if energy rises.
 Keep R1 integrals in memory in canonical form, NReq=    54018915.
 Integral accuracy reduced to 1.0D-05 until final iterations.
 Initial convergence to 1.0D-05 achieved.  Increase integral accuracy.
 SCF Done:  E(RB+HF-LYP) =  -248.585383052     A.U. after   14 cycles
             Convg  =    0.8146D-08             -V/T =  2.0040
             S**2   =   0.0000
 Range of M.O.s used for correlation:     1   137
 NBasis=   137 NAE=    20 NBE=    20 NFC=     0 NFV=     0
 NROrb=    137 NOA=    20 NOB=    20 NVA=   117 NVB=   117

 **** Warning!!: The largest alpha MO coefficient is  0.10475360D+02

 Symmetrizing basis deriv contribution to polar:
 IMax=3 JMax=2 DiffMx= 0.00D+00
 G2DrvN: will do   13 centers at a time, making    1 passes doing MaxLOS=2.
 FoFDir/FoFCou used for L=0 through L=2.
 DoAtom=TTTTTTTTTTTT
          Differentiating once with respect to electric field.
                with respect to dipole field.
          Differentiating once with respect to nuclear coordinates.
          Store integrals in memory, NReq=    52370486.
          There are  39 degrees of freedom in the 1st order CPHF.
    36 vectors were produced by pass  0.
 AX will form  36 AO Fock derivatives at one time.
    36 vectors were produced by pass  1.
    36 vectors were produced by pass  2.
    36 vectors were produced by pass  3.
    36 vectors were produced by pass  4.
    23 vectors were produced by pass  5.
     4 vectors were produced by pass  6.
     1 vectors were produced by pass  7.
 Inv2:  IOpt= 1 Iter= 1 AM= 1.85D-15 Conv= 1.00D-12.
 Inverted reduced A of dimension  208 with in-core refinement.
 Isotropic polarizability for W=    0.000000       46.98 Bohr**3.
 End of Minotr Frequency-dependent properties file   721 does not exist.
 ***** Axes restored to original set *****
 -------------------------------------------------------------------
 Center     Atomic                   Forces (Hartrees/Bohr)
 Number     Number              X              Y              Z
 -------------------------------------------------------------------
    1          6           0.000046336   -0.001785255   -0.006473436
    2          1          -0.000290445   -0.003080005   -0.000072816
    3          1           0.001048885   -0.000260387    0.004183015
    4          1          -0.002721479   -0.000423106    0.000296321
    5          7           0.009560846    0.009844290    0.037752644
    6          6          -0.003455042   -0.004360324   -0.007050005
    7          1           0.001066916   -0.002520868   -0.000489541
    8          1           0.001125490    0.001043282   -0.001950552
    9          1           0.002706691    0.001114673    0.002645790
   10          6          -0.032876550   -0.055247139   -0.032716949
   11          1          -0.006171922    0.004196850    0.019802087
   12          8           0.029960274    0.051477989   -0.015926557
 -------------------------------------------------------------------
 Cartesian Forces:  Max     0.055247139 RMS     0.017683407

 GradGradGradGradGradGradGradGradGradGradGradGradGradGradGradGradGradGrad
 Berny optimization.
 Internal  Forces:  Max     0.056537173 RMS     0.011155542
 Search for a local minimum.
 Step number   3 out of a maximum of  55
 All quantities printed in internal units (Hartrees-Bohrs-Radians)
 Second derivative matrix not updated -- analytic derivatives used.
 Trust test= 8.77D-01 RLast= 5.88D-01 DXMaxT set to 6.00D-01
     Eigenvalues ---    0.00164   0.00293   0.01228   0.02293   0.06111
     Eigenvalues ---    0.06165   0.06217   0.06278   0.08336   0.12550
     Eigenvalues ---    0.13227   0.15579   0.16003   0.16760   0.16894
     Eigenvalues ---    0.17426   0.19295   0.20699   0.27427   0.32230
     Eigenvalues ---    0.32914   0.33521   0.34040   0.34665   0.34945
     Eigenvalues ---    0.35307   0.36077   0.36480   0.42045   1.01775
     Eigenvalues --- 1000.000001000.000001000.000001000.000001000.00000
     Eigenvalues --- 1000.000001000.000001000.000001000.000001000.00000
     Eigenvalues --- 1000.000001000.000001000.000001000.000001000.00000
 RFO step:  Lambda=-1.81977843D-02.
 Quintic linear search produced a step of  0.10556.
 Iteration  1 RMS(Cart)=  0.03946904 RMS(Int)=  0.00879260
 Iteration  2 RMS(Cart)=  0.00983307 RMS(Int)=  0.00510907
 Iteration  3 RMS(Cart)=  0.00012722 RMS(Int)=  0.00510717
 Iteration  4 RMS(Cart)=  0.00000176 RMS(Int)=  0.00510717
 Iteration  5 RMS(Cart)=  0.00000003 RMS(Int)=  0.00510717
 Variable       Old X    -DE/DX   Delta X   Delta X   Delta X     New X
                                 (Linear)    (Quad)   (Total)
    R1        2.05020   0.00280   0.00198   0.00578   0.00776   2.05796
    R2        2.06102   0.00370   0.00275   0.00738   0.01013   2.07116
    R3        2.05199   0.00272   0.00210   0.00509   0.00719   2.05917
    R4        2.78485   0.00156   0.00011  -0.01639  -0.01629   2.76856
    R5        2.77997   0.00162  -0.00023  -0.01243  -0.01266   2.76731
    R6        2.62843   0.00740  -0.01195  -0.01677  -0.02871   2.59972
    R7        2.05085   0.00271   0.00202   0.00531   0.00733   2.05818
    R8        2.04675   0.00246   0.00171   0.00457   0.00628   2.05302
    R9        2.05979   0.00362   0.00266   0.00717   0.00983   2.06962
   R10        2.06850   0.00946   0.00325   0.01232   0.01558   2.08408
   R11        2.23402   0.05654  -0.02569   0.06625   0.04056   2.27458
    A1        1.89777  -0.00124  -0.00090  -0.00386  -0.00478   1.89299
    A2        1.89703  -0.00106  -0.00104  -0.00875  -0.00979   1.88724
    A3        1.90618  -0.00001  -0.00032   0.00071   0.00037   1.90656
    A4        1.90271  -0.00082  -0.00054  -0.00200  -0.00261   1.90010
    A5        1.94582   0.00290   0.00246   0.01046   0.01288   1.95870
    A6        1.91365   0.00013   0.00028   0.00289   0.00314   1.91679
    A7        1.94653   0.00077   0.00329   0.04193   0.03995   1.98649
    A8        1.96551   0.00280   0.00479   0.04798   0.04768   2.01319
    A9        1.97125   0.00276   0.00529   0.03878   0.03862   2.00987
   A10        1.90255  -0.00021  -0.00057   0.00040  -0.00019   1.90237
   A11        1.90855   0.00007  -0.00019   0.00031   0.00011   1.90866
   A12        1.93446   0.00221   0.00159   0.00835   0.00993   1.94439
   A13        1.91204  -0.00053   0.00022  -0.00248  -0.00226   1.90978
   A14        1.90601  -0.00082  -0.00025  -0.00148  -0.00174   1.90426
   A15        1.90014  -0.00075  -0.00079  -0.00519  -0.00599   1.89415
   A16        1.95296   0.00033   0.00181   0.01390  -0.00318   1.94978
   A17        2.13663   0.01957   0.01433   0.04198   0.03750   2.17413
   A18        2.08277  -0.00021   0.01272   0.06978   0.06334   2.14612
    D1       -1.01363   0.00217   0.00305   0.03816   0.04180  -0.97183
    D2        3.03218  -0.00457  -0.00973  -0.08981  -0.10014   2.93203
    D3        1.08394   0.00244   0.00328   0.04043   0.04428   1.12822
    D4       -1.15344  -0.00430  -0.00951  -0.08754  -0.09766  -1.25110
    D5       -3.09053   0.00339   0.00435   0.04666   0.05163  -3.03890
    D6        0.95527  -0.00334  -0.00843  -0.08131  -0.09031   0.86496
    D7        0.98974  -0.00267  -0.00517  -0.05258  -0.05807   0.93167
    D8        3.07969  -0.00340  -0.00537  -0.05517  -0.06086   3.01883
    D9       -1.10858  -0.00290  -0.00548  -0.05618  -0.06199  -1.17057
   D10       -3.05914   0.00411   0.00735   0.08077   0.08844  -2.97069
   D11       -0.96919   0.00338   0.00715   0.07818   0.08565  -0.88353
   D12        1.12572   0.00388   0.00704   0.07716   0.08452   1.21025
   D13       -0.75589   0.02111   0.02259   0.17947   0.20420  -0.55170
   D14        2.87907  -0.01880  -0.01992  -0.09876  -0.11949   2.75958
   D15       -2.98025   0.01532   0.01082   0.04786   0.05951  -2.92075
   D16        0.65471  -0.02459  -0.03169  -0.23037  -0.26418   0.39053
         Item               Value     Threshold  Converged?
 Maximum Force            0.056537     0.000015     NO 
 RMS     Force            0.011156     0.000010     NO 
 Maximum Displacement     0.132901     0.000060     NO 
 RMS     Displacement     0.043399     0.000040     NO 
 Predicted change in Energy=-1.301009D-02
 GradGradGradGradGradGradGradGradGradGradGradGradGradGradGradGradGradGrad

                          Input orientation:                          
 ---------------------------------------------------------------------
 Center     Atomic     Atomic              Coordinates (Angstroms)
 Number     Number      Type              X           Y           Z
 ---------------------------------------------------------------------
    1          6             0       -2.992334   -0.776581    0.006869
    2          1             0       -2.631959   -1.804206    0.016537
    3          1             0       -2.705055   -0.299170    0.950684
    4          1             0       -4.079718   -0.799191   -0.059924
    5          7             0       -2.437399   -0.081363   -1.157226
    6          6             0       -0.975113   -0.118461   -1.226537
    7          1             0       -0.643133   -1.153601   -1.159417
    8          1             0       -0.648553    0.305065   -2.172198
    9          1             0       -0.521641    0.456940   -0.412452
   10          6             0       -3.005513    1.139158   -1.440350
   11          1             0       -4.071293    1.168398   -1.158346
   12          8             0       -2.473870    2.007482   -2.082343
 ---------------------------------------------------------------------
                    Distance matrix (angstroms):
                    1          2          3          4          5
     1  C    0.000000
     2  H    1.089026   0.000000
     3  H    1.096009   1.772881   0.000000
     4  H    1.089668   1.764060   1.777933   0.000000
     5  N    1.465059   2.093743   2.135969   2.101561   0.000000
     6  C    2.454300   2.670600   2.786690   3.385698   1.464397
     7  H    2.649738   2.400330   3.071498   3.625549   2.090237
     8  H    3.378106   3.629529   3.787702   4.177795   2.092717
     9  H    2.793157   3.122539   2.682748   3.789730   2.124756
    10  C    2.400973   3.305367   2.806441   2.610879   1.375713
    11  H    2.510940   3.505482   2.910046   2.253444   2.057064
    12  O    3.519178   4.354222   3.817504   3.813966   2.284829
                    6          7          8          9         10
     6  C    0.000000
     7  H    1.089143   0.000000
     8  H    1.086412   1.775799   0.000000
     9  H    1.095197   1.779483   1.770841   0.000000
    10  C    2.397883   3.304014   2.605105   2.773376   0.000000
    11  H    3.353652   4.140527   3.672654   3.696290   1.102846
    12  O    2.738304   3.767736   2.497615   3.000652   1.203654
                   11         12
    11  H    0.000000
    12  O    2.027212   0.000000
 Stoichiometry    C3H7NO
 Framework group  C1[X(C3H7NO)]
 Deg. of freedom    30
 Full point group                 C1
 Largest Abelian subgroup         C1      NOp   1
 Largest concise Abelian subgroup C1      NOp   1
                         Standard orientation:                         
 ---------------------------------------------------------------------
 Center     Atomic     Atomic              Coordinates (Angstroms)
 Number     Number      Type              X           Y           Z
 ---------------------------------------------------------------------
    1          6             0        1.566107   -0.729662    0.095416
    2          1             0        2.431895   -0.243209   -0.351520
    3          1             0        1.701396   -0.748265    1.182884
    4          1             0        1.525687   -1.754635   -0.272242
    5          7             0        0.351621   -0.011829   -0.299726
    6          6             0        0.373361    1.414377    0.031823
    7          1             0        1.276822    1.860715   -0.381424
    8          1             0       -0.498492    1.897810   -0.399982
    9          1             0        0.358384    1.573134    1.115348
   10          6             0       -0.830854   -0.658455   -0.023661
   11          1             0       -0.719560   -1.754212   -0.080213
   12          8             0       -1.898645   -0.113262    0.082971
 ---------------------------------------------------------------------
 Rotational constants (GHZ):      8.8868763      4.3290557      3.0759959
 Standard basis: TZVP (5D, 7F)
 There are   137 symmetry adapted basis functions of A   symmetry.
 Integral buffers will be    131072 words long.
 Raffenetti 2 integral format.
 Two-electron integral symmetry is turned on.
   137 basis functions,   231 primitive gaussians,   142 cartesian basis functions
    20 alpha electrons       20 beta electrons
       nuclear repulsion energy       182.5289496999 Hartrees.
 NAtoms=   12 NActive=   12 NUniq=   12 SFac= 7.50D-01 NAtFMM=   80 NAOKFM=F Big=F
 One-electron integrals computed using PRISM.
 NBasis=   137 RedAO= T  NBF=   137
 NBsUse=   137 1.00D-06 NBFU=   137
 Initial guess read from the read-write file:
 Initial guess orbital symmetries:
       Occupied  (A) (A) (A) (A) (A) (A) (A) (A) (A) (A) (A) (A)
                 (A) (A) (A) (A) (A) (A) (A) (A)
       Virtual   (A) (A) (A) (A) (A) (A) (A) (A) (A) (A) (A) (A)
                 (A) (A) (A) (A) (A) (A) (A) (A) (A) (A) (A) (A)
                 (A) (A) (A) (A) (A) (A) (A) (A) (A) (A) (A) (A)
                 (A) (A) (A) (A) (A) (A) (A) (A) (A) (A) (A) (A)
                 (A) (A) (A) (A) (A) (A) (A) (A) (A) (A) (A) (A)
                 (A) (A) (A) (A) (A) (A) (A) (A) (A) (A) (A) (A)
                 (A) (A) (A) (A) (A) (A) (A) (A) (A) (A) (A) (A)
                 (A) (A) (A) (A) (A) (A) (A) (A) (A) (A) (A) (A)
                 (A) (A) (A) (A) (A) (A) (A) (A) (A) (A) (A) (A)
                 (A) (A) (A) (A) (A) (A) (A) (A) (A)
 Harris functional with IExCor=  402 diagonalized for initial guess.
 ExpMin= 9.52D-02 ExpMax= 2.70D+04 ExpMxC= 9.22D+02 IAcc=2 IRadAn=         4 AccDes= 0.00D+00
 HarFok:  IExCor= 402 AccDes= 0.00D+00 IRadAn=         4 IDoV=1
 ScaDFX=  1.000000  1.000000  1.000000  1.000000
 Requested convergence on RMS density matrix=1.00D-08 within 128 cycles.
 Requested convergence on MAX density matrix=1.00D-06.
 Requested convergence on             energy=1.00D-06.
 No special actions if energy rises.
 Keep R1 integrals in memory in canonical form, NReq=    54018915.
 Integral accuracy reduced to 1.0D-05 until final iterations.
 Initial convergence to 1.0D-05 achieved.  Increase integral accuracy.
 SCF Done:  E(RB+HF-LYP) =  -248.598845029     A.U. after   13 cycles
             Convg  =    0.7191D-08             -V/T =  2.0046
             S**2   =   0.0000
 Range of M.O.s used for correlation:     1   137
 NBasis=   137 NAE=    20 NBE=    20 NFC=     0 NFV=     0
 NROrb=    137 NOA=    20 NOB=    20 NVA=   117 NVB=   117
 Symmetrizing basis deriv contribution to polar:
 IMax=3 JMax=2 DiffMx= 0.00D+00
 G2DrvN: will do   13 centers at a time, making    1 passes doing MaxLOS=2.
 FoFDir/FoFCou used for L=0 through L=2.
 DoAtom=TTTTTTTTTTTT
          Differentiating once with respect to electric field.
                with respect to dipole field.
          Differentiating once with respect to nuclear coordinates.
          Store integrals in memory, NReq=    52370486.
          There are  39 degrees of freedom in the 1st order CPHF.
    36 vectors were produced by pass  0.
 AX will form  36 AO Fock derivatives at one time.
    36 vectors were produced by pass  1.
    36 vectors were produced by pass  2.
    36 vectors were produced by pass  3.
    36 vectors were produced by pass  4.
    22 vectors were produced by pass  5.
     4 vectors were produced by pass  6.
     1 vectors were produced by pass  7.
 Inv2:  IOpt= 1 Iter= 1 AM= 1.84D-15 Conv= 1.00D-12.
 Inverted reduced A of dimension  207 with in-core refinement.
 Isotropic polarizability for W=    0.000000       47.33 Bohr**3.
 End of Minotr Frequency-dependent properties file   721 does not exist.
 ***** Axes restored to original set *****
 -------------------------------------------------------------------
 Center     Atomic                   Forces (Hartrees/Bohr)
 Number     Number              X              Y              Z
 -------------------------------------------------------------------
    1          6          -0.001460190   -0.003384918   -0.003182308
    2          1          -0.000611843   -0.000656418   -0.000161325
    3          1           0.000547908   -0.000379222    0.000447685
    4          1          -0.000339225    0.000268203    0.000335240
    5          7           0.006358923    0.008006595    0.019738390
    6          6          -0.000424994   -0.003373637   -0.004700270
    7          1           0.000282097   -0.000299497   -0.000346615
    8          1           0.000226178    0.000362099   -0.000080403
    9          1           0.000369231   -0.000065301    0.000366151
   10          6          -0.009997790   -0.018963885   -0.014422610
   11          1          -0.000824559    0.003462013    0.004042279
   12          8           0.005874264    0.015023968   -0.002036213
 -------------------------------------------------------------------
 Cartesian Forces:  Max     0.019738390 RMS     0.006487209

 GradGradGradGradGradGradGradGradGradGradGradGradGradGradGradGradGradGrad
 Berny optimization.
 Internal  Forces:  Max     0.014520482 RMS     0.003231410
 Search for a local minimum.
 Step number   4 out of a maximum of  55
 All quantities printed in internal units (Hartrees-Bohrs-Radians)
 Second derivative matrix not updated -- analytic derivatives used.
 Trust test= 1.03D+00 RLast= 4.60D-01 DXMaxT set to 8.49D-01
     Eigenvalues ---    0.00147   0.00271   0.01313   0.01590   0.06057
     Eigenvalues ---    0.06131   0.06192   0.06236   0.08533   0.12553
     Eigenvalues ---    0.13126   0.14952   0.15710   0.16676   0.17146
     Eigenvalues ---    0.17403   0.19673   0.20664   0.26249   0.31765
     Eigenvalues ---    0.31837   0.32414   0.33700   0.33938   0.34209
     Eigenvalues ---    0.34751   0.35827   0.36431   0.42398   0.88487
     Eigenvalues --- 1000.000001000.000001000.000001000.000001000.00000
     Eigenvalues --- 1000.000001000.000001000.000001000.000001000.00000
     Eigenvalues --- 1000.000001000.000001000.000001000.000001000.00000
 RFO step:  Lambda=-5.66561232D-03.
 Quintic linear search produced a step of  0.71220.
 Iteration  1 RMS(Cart)=  0.06768624 RMS(Int)=  0.02996960
 Iteration  2 RMS(Cart)=  0.02735051 RMS(Int)=  0.00748570
 Iteration  3 RMS(Cart)=  0.00080047 RMS(Int)=  0.00746224
 Iteration  4 RMS(Cart)=  0.00000130 RMS(Int)=  0.00746224
 Iteration  5 RMS(Cart)=  0.00000002 RMS(Int)=  0.00746224
 Variable       Old X    -DE/DX   Delta X   Delta X   Delta X     New X
                                 (Linear)    (Quad)   (Total)
    R1        2.05796   0.00041   0.00552  -0.00177   0.00375   2.06171
    R2        2.07116   0.00036   0.00722  -0.00444   0.00277   2.07393
    R3        2.05917   0.00031   0.00512  -0.00378   0.00134   2.06051
    R4        2.76856   0.00064  -0.01160  -0.01947  -0.03107   2.73749
    R5        2.76731   0.00076  -0.00902  -0.01593  -0.02495   2.74236
    R6        2.59972   0.00418  -0.02045  -0.01432  -0.03477   2.56495
    R7        2.05818   0.00035   0.00522  -0.00269   0.00254   2.06072
    R8        2.05302   0.00028   0.00447  -0.00305   0.00142   2.05444
    R9        2.06962   0.00039   0.00700  -0.00391   0.00309   2.07271
   R10        2.08408   0.00192   0.01110  -0.00899   0.00211   2.08618
   R11        2.27458   0.01452   0.02889  -0.01114   0.01774   2.29232
    A1        1.89299  -0.00023  -0.00340   0.00169  -0.00174   1.89125
    A2        1.88724  -0.00035  -0.00697   0.00448  -0.00250   1.88473
    A3        1.90656   0.00031   0.00027   0.00903   0.00927   1.91583
    A4        1.90010  -0.00011  -0.00186  -0.00274  -0.00464   1.89547
    A5        1.95870   0.00025   0.00917  -0.00910   0.00003   1.95874
    A6        1.91679   0.00012   0.00223  -0.00284  -0.00064   1.91615
    A7        1.98649   0.00068   0.02846   0.04944   0.05367   2.04016
    A8        2.01319   0.00138   0.03396   0.06830   0.07939   2.09258
    A9        2.00987   0.00115   0.02751   0.05166   0.05451   2.06437
   A10        1.90237   0.00022  -0.00013   0.00522   0.00508   1.90744
   A11        1.90866   0.00008   0.00008  -0.00506  -0.00498   1.90368
   A12        1.94439   0.00028   0.00707  -0.00269   0.00437   1.94877
   A13        1.90978  -0.00019  -0.00161   0.00603   0.00443   1.91421
   A14        1.90426  -0.00019  -0.00124  -0.00277  -0.00404   1.90022
   A15        1.89415  -0.00020  -0.00427  -0.00058  -0.00485   1.88930
   A16        1.94978   0.00056  -0.00226   0.01345  -0.00458   1.94521
   A17        2.17413   0.00490   0.02671  -0.00644   0.00451   2.17864
   A18        2.14612  -0.00368   0.04511  -0.01613   0.01322   2.15934
    D1       -0.97183   0.00140   0.02977  -0.01321   0.01856  -0.95327
    D2        2.93203  -0.00277  -0.07132  -0.22944  -0.30277   2.62926
    D3        1.12822   0.00148   0.03154  -0.01082   0.02271   1.15093
    D4       -1.25110  -0.00270  -0.06955  -0.22705  -0.29862  -1.54972
    D5       -3.03890   0.00158   0.03677  -0.02238   0.01641  -3.02249
    D6        0.86496  -0.00260  -0.06432  -0.23861  -0.30492   0.56004
    D7        0.93167  -0.00179  -0.04136  -0.04899  -0.09010   0.84158
    D8        3.01883  -0.00185  -0.04334  -0.04154  -0.08465   2.93418
    D9       -1.17057  -0.00187  -0.04415  -0.04727  -0.09120  -1.26177
   D10       -2.97069   0.00248   0.06299   0.17430   0.23707  -2.73362
   D11       -0.88353   0.00243   0.06100   0.18175   0.24252  -0.64101
   D12        1.21025   0.00240   0.06020   0.17602   0.23597   1.44622
   D13       -0.55170   0.00677   0.14543   0.07405   0.22157  -0.33013
   D14        2.75958  -0.00416  -0.08510   0.13369   0.05069   2.81027
   D15       -2.92075   0.00274   0.04238  -0.14429  -0.10402  -3.02476
   D16        0.39053  -0.00819  -0.18815  -0.08466  -0.27489   0.11564
         Item               Value     Threshold  Converged?
 Maximum Force            0.014520     0.000015     NO 
 RMS     Force            0.003231     0.000010     NO 
 Maximum Displacement     0.215428     0.000060     NO 
 RMS     Displacement     0.085263     0.000040     NO 
 Predicted change in Energy=-3.673840D-03
 GradGradGradGradGradGradGradGradGradGradGradGradGradGradGradGradGradGrad

                          Input orientation:                          
 ---------------------------------------------------------------------
 Center     Atomic     Atomic              Coordinates (Angstroms)
 Number     Number      Type              X           Y           Z
 ---------------------------------------------------------------------
    1          6             0       -2.990434   -0.770392    0.033260
    2          1             0       -2.702377   -1.818574   -0.059729
    3          1             0       -2.674998   -0.411529    1.021275
    4          1             0       -4.077668   -0.713389   -0.026694
    5          7             0       -2.398986   -0.002366   -1.043226
    6          6             0       -0.959546   -0.095647   -1.202227
    7          1             0       -0.662306   -1.144674   -1.183541
    8          1             0       -0.677795    0.347750   -2.154033
    9          1             0       -0.428757    0.437814   -0.404276
   10          6             0       -3.026333    1.109008   -1.505380
   11          1             0       -4.093415    1.117369   -1.222542
   12          8             0       -2.492966    1.989099   -2.147591
 ---------------------------------------------------------------------
                    Distance matrix (angstroms):
                    1          2          3          4          5
     1  C    0.000000
     2  H    1.091012   0.000000
     3  H    1.097477   1.774568   0.000000
     4  H    1.090377   1.764639   1.776750   0.000000
     5  N    1.448619   2.087564   2.122678   2.087310   0.000000
     6  C    2.471075   2.703930   2.826042   3.389125   1.451196
     7  H    2.653464   2.424662   3.074027   3.631666   2.083414
     8  H    3.373839   3.630152   3.827258   4.148581   2.078213
     9  H    2.865901   3.221699   2.792701   3.844787   2.117503
    10  C    2.429166   3.281096   2.969757   2.571565   1.357315
    11  H    2.521358   3.450634   3.063356   2.186772   2.038884
    12  O    3.552236   4.347573   3.979681   3.783243   2.279120
                    6          7          8          9         10
     6  C    0.000000
     7  H    1.090486   0.000000
     8  H    1.087161   1.780288   0.000000
     9  H    1.096833   1.779345   1.769684   0.000000
    10  C    2.411370   3.281964   2.552626   2.900058   0.000000
    11  H    3.360499   4.109850   3.623044   3.815897   1.103961
    12  O    2.755223   3.755162   2.447225   3.115540   1.213044
                   11         12
    11  H    0.000000
    12  O    2.043787   0.000000
 Stoichiometry    C3H7NO
 Framework group  C1[X(C3H7NO)]
 Deg. of freedom    30
 Full point group                 C1
 Largest Abelian subgroup         C1      NOp   1
 Largest concise Abelian subgroup C1      NOp   1
                         Standard orientation:                         
 ---------------------------------------------------------------------
 Center     Atomic     Atomic              Coordinates (Angstroms)
 Number     Number      Type              X           Y           Z
 ---------------------------------------------------------------------
    1          6             0        1.587257   -0.725262    0.073119
    2          1             0        2.388167   -0.292186   -0.527960
    3          1             0        1.884961   -0.681848    1.128555
    4          1             0        1.478139   -1.771275   -0.214757
    5          7             0        0.348983   -0.016164   -0.176588
    6          6             0        0.367923    1.423054    0.008512
    7          1             0        1.235311    1.840727   -0.503687
    8          1             0       -0.542403    1.846835   -0.408185
    9          1             0        0.418281    1.693992    1.070161
   10          6             0       -0.837630   -0.664287   -0.057466
   11          1             0       -0.705638   -1.759466   -0.100951
   12          8             0       -1.913126   -0.120583    0.080994
 ---------------------------------------------------------------------
 Rotational constants (GHZ):      8.9406373      4.2854717      3.0302461
 Standard basis: TZVP (5D, 7F)
 There are   137 symmetry adapted basis functions of A   symmetry.
 Integral buffers will be    131072 words long.
 Raffenetti 2 integral format.
 Two-electron integral symmetry is turned on.
   137 basis functions,   231 primitive gaussians,   142 cartesian basis functions
    20 alpha electrons       20 beta electrons
       nuclear repulsion energy       182.4503959724 Hartrees.
 NAtoms=   12 NActive=   12 NUniq=   12 SFac= 7.50D-01 NAtFMM=   80 NAOKFM=F Big=F
 One-electron integrals computed using PRISM.
 NBasis=   137 RedAO= T  NBF=   137
 NBsUse=   137 1.00D-06 NBFU=   137
 Initial guess read from the read-write file:
 Initial guess orbital symmetries:
       Occupied  (A) (A) (A) (A) (A) (A) (A) (A) (A) (A) (A) (A)
                 (A) (A) (A) (A) (A) (A) (A) (A)
       Virtual   (A) (A) (A) (A) (A) (A) (A) (A) (A) (A) (A) (A)
                 (A) (A) (A) (A) (A) (A) (A) (A) (A) (A) (A) (A)
                 (A) (A) (A) (A) (A) (A) (A) (A) (A) (A) (A) (A)
                 (A) (A) (A) (A) (A) (A) (A) (A) (A) (A) (A) (A)
                 (A) (A) (A) (A) (A) (A) (A) (A) (A) (A) (A) (A)
                 (A) (A) (A) (A) (A) (A) (A) (A) (A) (A) (A) (A)
                 (A) (A) (A) (A) (A) (A) (A) (A) (A) (A) (A) (A)
                 (A) (A) (A) (A) (A) (A) (A) (A) (A) (A) (A) (A)
                 (A) (A) (A) (A) (A) (A) (A) (A) (A) (A) (A) (A)
                 (A) (A) (A) (A) (A) (A) (A) (A) (A)
 Harris functional with IExCor=  402 diagonalized for initial guess.
 ExpMin= 9.52D-02 ExpMax= 2.70D+04 ExpMxC= 9.22D+02 IAcc=2 IRadAn=         4 AccDes= 0.00D+00
 HarFok:  IExCor= 402 AccDes= 0.00D+00 IRadAn=         4 IDoV=1
 ScaDFX=  1.000000  1.000000  1.000000  1.000000
 Requested convergence on RMS density matrix=1.00D-08 within 128 cycles.
 Requested convergence on MAX density matrix=1.00D-06.
 Requested convergence on             energy=1.00D-06.
 No special actions if energy rises.
 Keep R1 integrals in memory in canonical form, NReq=    54018915.
 Integral accuracy reduced to 1.0D-05 until final iterations.
 Initial convergence to 1.0D-05 achieved.  Increase integral accuracy.
 SCF Done:  E(RB+HF-LYP) =  -248.603300376     A.U. after   13 cycles
             Convg  =    0.4454D-08             -V/T =  2.0046
             S**2   =   0.0000
 Range of M.O.s used for correlation:     1   137
 NBasis=   137 NAE=    20 NBE=    20 NFC=     0 NFV=     0
 NROrb=    137 NOA=    20 NOB=    20 NVA=   117 NVB=   117

 **** Warning!!: The largest alpha MO coefficient is  0.10740935D+02

 Symmetrizing basis deriv contribution to polar:
 IMax=3 JMax=2 DiffMx= 0.00D+00
 G2DrvN: will do   13 centers at a time, making    1 passes doing MaxLOS=2.
 FoFDir/FoFCou used for L=0 through L=2.
 DoAtom=TTTTTTTTTTTT
          Differentiating once with respect to electric field.
                with respect to dipole field.
          Differentiating once with respect to nuclear coordinates.
          Store integrals in memory, NReq=    52370486.
          There are  39 degrees of freedom in the 1st order CPHF.
    36 vectors were produced by pass  0.
 AX will form  36 AO Fock derivatives at one time.
    36 vectors were produced by pass  1.
    36 vectors were produced by pass  2.
    36 vectors were produced by pass  3.
    36 vectors were produced by pass  4.
    21 vectors were produced by pass  5.
     4 vectors were produced by pass  6.
     1 vectors were produced by pass  7.
 Inv2:  IOpt= 1 Iter= 1 AM= 1.98D-15 Conv= 1.00D-12.
 Inverted reduced A of dimension  206 with in-core refinement.
 Isotropic polarizability for W=    0.000000       47.72 Bohr**3.
 End of Minotr Frequency-dependent properties file   721 does not exist.
 ***** Axes restored to original set *****
 -------------------------------------------------------------------
 Center     Atomic                   Forces (Hartrees/Bohr)
 Number     Number              X              Y              Z
 -------------------------------------------------------------------
    1          6          -0.002452614   -0.003709622    0.000577909
    2          1          -0.000384003   -0.000376623    0.000230358
    3          1           0.000235037   -0.000195016   -0.000555464
    4          1          -0.000016423    0.000463043    0.000470049
    5          7           0.003429376   -0.000474453    0.004610419
    6          6           0.003134258   -0.001032252   -0.001221704
    7          1           0.000277947   -0.000019200   -0.000227605
    8          1           0.000223285    0.000136212    0.000177911
    9          1          -0.000176475   -0.000484825   -0.000084120
   10          6          -0.000819126   -0.000018612    0.002448066
   11          1          -0.001325227    0.002244811   -0.002154797
   12          8          -0.002126036    0.003466536   -0.004271023
 -------------------------------------------------------------------
 Cartesian Forces:  Max     0.004610419 RMS     0.001828007

 GradGradGradGradGradGradGradGradGradGradGradGradGradGradGradGradGradGrad
 Berny optimization.
 Internal  Forces:  Max     0.007987155 RMS     0.001948503
 Search for a local minimum.
 Step number   5 out of a maximum of  55
 All quantities printed in internal units (Hartrees-Bohrs-Radians)
 Second derivative matrix not updated -- analytic derivatives used.
 Trust test= 1.21D+00 RLast= 7.89D-01 DXMaxT set to 1.00D+00
     Eigenvalues ---    0.00101   0.00231   0.00685   0.01747   0.06064
     Eigenvalues ---    0.06116   0.06166   0.06224   0.08661   0.12768
     Eigenvalues ---    0.13252   0.14821   0.16031   0.16906   0.17507
     Eigenvalues ---    0.17681   0.20854   0.21479   0.26363   0.31726
     Eigenvalues ---    0.31757   0.32151   0.33512   0.33794   0.34082
     Eigenvalues ---    0.34847   0.36920   0.38209   0.45766   0.83966
     Eigenvalues --- 1000.000001000.000001000.000001000.000001000.00000
     Eigenvalues --- 1000.000001000.000001000.000001000.000001000.00000
     Eigenvalues --- 1000.000001000.000001000.000001000.000001000.00000
 RFO step:  Lambda=-1.95586489D-03.
 Quintic linear search produced a step of  0.20375.
 Iteration  1 RMS(Cart)=  0.08818582 RMS(Int)=  0.01365641
 Iteration  2 RMS(Cart)=  0.01486078 RMS(Int)=  0.00244609
 Iteration  3 RMS(Cart)=  0.00016772 RMS(Int)=  0.00244246
 Iteration  4 RMS(Cart)=  0.00000005 RMS(Int)=  0.00244246
 Variable       Old X    -DE/DX   Delta X   Delta X   Delta X     New X
                                 (Linear)    (Quad)   (Total)
    R1        2.06171   0.00024   0.00076   0.00206   0.00283   2.06454
    R2        2.07393  -0.00050   0.00057  -0.00271  -0.00215   2.07178
    R3        2.06051   0.00002   0.00027  -0.00092  -0.00064   2.05987
    R4        2.73749   0.00363  -0.00633   0.00690   0.00057   2.73807
    R5        2.74236   0.00367  -0.00508   0.00722   0.00213   2.74450
    R6        2.56495   0.00799  -0.00708   0.01109   0.00401   2.56896
    R7        2.06072   0.00009   0.00052   0.00151   0.00203   2.06275
    R8        2.05444  -0.00004   0.00029  -0.00058  -0.00030   2.05414
    R9        2.07271  -0.00038   0.00063  -0.00205  -0.00142   2.07129
   R10        2.08618   0.00075   0.00043   0.00089   0.00132   2.08750
   R11        2.29232   0.00384   0.00362   0.00176   0.00537   2.29770
    A1        1.89125  -0.00015  -0.00035  -0.00049  -0.00083   1.89042
    A2        1.88473  -0.00013  -0.00051   0.00589   0.00536   1.89009
    A3        1.91583   0.00083   0.00189   0.00805   0.00994   1.92577
    A4        1.89547  -0.00006  -0.00094  -0.00165  -0.00264   1.89282
    A5        1.95874  -0.00060   0.00001  -0.00853  -0.00854   1.95020
    A6        1.91615   0.00013  -0.00013  -0.00278  -0.00295   1.91320
    A7        2.04016   0.00004   0.01094   0.00786   0.00928   2.04943
    A8        2.09258  -0.00038   0.01618   0.01595   0.02299   2.11557
    A9        2.06437   0.00089   0.01111   0.02355   0.02535   2.08972
   A10        1.90744   0.00037   0.00103   0.00593   0.00697   1.91441
   A11        1.90368   0.00030  -0.00102  -0.00591  -0.00692   1.89676
   A12        1.94877  -0.00014   0.00089  -0.00536  -0.00447   1.94430
   A13        1.91421  -0.00024   0.00090   0.00213   0.00305   1.91726
   A14        1.90022  -0.00022  -0.00082  -0.00426  -0.00507   1.89515
   A15        1.88930  -0.00008  -0.00099   0.00757   0.00657   1.89587
   A16        1.94521   0.00148  -0.00093   0.01195   0.01000   1.95521
   A17        2.17864   0.00356   0.00092   0.01359   0.01349   2.19213
   A18        2.15934  -0.00504   0.00269  -0.02547  -0.02379   2.13555
    D1       -0.95327   0.00054   0.00378  -0.05416  -0.05019  -1.00346
    D2        2.62926  -0.00102  -0.06169  -0.17446  -0.23632   2.39295
    D3        1.15093   0.00052   0.00463  -0.05487  -0.05009   1.10084
    D4       -1.54972  -0.00104  -0.06084  -0.17517  -0.23622  -1.78594
    D5       -3.02249   0.00012   0.00334  -0.06455  -0.06101  -3.08351
    D6        0.56004  -0.00144  -0.06213  -0.18485  -0.24714   0.31290
    D7        0.84158  -0.00043  -0.01836   0.06638   0.04819   0.88977
    D8        2.93418  -0.00032  -0.01725   0.06898   0.05189   2.98607
    D9       -1.26177  -0.00032  -0.01858   0.07119   0.05278  -1.20898
   D10       -2.73362   0.00078   0.04830   0.18278   0.23092  -2.50270
   D11       -0.64101   0.00089   0.04941   0.18538   0.23461  -0.40640
   D12        1.44622   0.00089   0.04808   0.18759   0.23551   1.68173
   D13       -0.33013  -0.00034   0.04514   0.09040   0.13656  -0.19357
   D14        2.81027   0.00298   0.01033   0.15217   0.16349   2.97377
   D15       -3.02476  -0.00171  -0.02119  -0.02761  -0.04980  -3.07456
   D16        0.11564   0.00162  -0.05601   0.03416  -0.02287   0.09277
         Item               Value     Threshold  Converged?
 Maximum Force            0.007987     0.000015     NO 
 RMS     Force            0.001949     0.000010     NO 
 Maximum Displacement     0.273167     0.000060     NO 
 RMS     Displacement     0.100366     0.000040     NO 
 Predicted change in Energy=-1.363633D-03
 GradGradGradGradGradGradGradGradGradGradGradGradGradGradGradGradGradGrad

                          Input orientation:                          
 ---------------------------------------------------------------------
 Center     Atomic     Atomic              Coordinates (Angstroms)
 Number     Number      Type              X           Y           Z
 ---------------------------------------------------------------------
    1          6             0       -2.984503   -0.763150    0.054070
    2          1             0       -2.781898   -1.822000   -0.123024
    3          1             0       -2.605544   -0.501614    1.049033
    4          1             0       -4.064464   -0.615484    0.046452
    5          7             0       -2.375501    0.046258   -0.981957
    6          6             0       -0.940923   -0.077939   -1.171184
    7          1             0       -0.672912   -1.131430   -1.270321
    8          1             0       -0.660854    0.460620   -2.072903
    9          1             0       -0.387770    0.345069   -0.324733
   10          6             0       -3.041864    1.089436   -1.543920
   11          1             0       -4.110458    1.097450   -1.264072
   12          8             0       -2.558893    1.917254   -2.292145
 ---------------------------------------------------------------------
                    Distance matrix (angstroms):
                    1          2          3          4          5
     1  C    0.000000
     2  H    1.092508   0.000000
     3  H    1.096341   1.774328   0.000000
     4  H    1.090036   1.769004   1.773861   0.000000
     5  N    1.448923   2.096023   2.116130   2.085215   0.000000
     6  C    2.479311   2.744008   2.807104   3.395306   1.452325
     7  H    2.689441   2.498198   3.084013   3.674603   2.090194
     8  H    3.379493   3.675760   3.801868   4.151413   2.074096
     9  H    2.848625   3.235541   2.742741   3.818183   2.114783
    10  C    2.447231   3.250075   3.073308   2.545928   1.359435
    11  H    2.543050   3.404445   3.189393   2.157251   2.048089
    12  O    3.587539   4.328606   4.125115   3.761721   2.291474
                    6          7          8          9         10
     6  C    0.000000
     7  H    1.091559   0.000000
     8  H    1.087005   1.782949   0.000000
     9  H    1.096081   1.776370   1.773139   0.000000
    10  C    2.432211   3.258686   2.518818   3.014086   0.000000
    11  H    3.381733   4.096909   3.599935   3.912396   1.104660
    12  O    2.802708   3.727669   2.402582   3.325094   1.215888
                   11         12
    11  H    0.000000
    12  O    2.033806   0.000000
 Stoichiometry    C3H7NO
 Framework group  C1[X(C3H7NO)]
 Deg. of freedom    30
 Full point group                 C1
 Largest Abelian subgroup         C1      NOp   1
 Largest concise Abelian subgroup C1      NOp   1
                         Standard orientation:                         
 ---------------------------------------------------------------------
 Center     Atomic     Atomic              Coordinates (Angstroms)
 Number     Number      Type              X           Y           Z
 ---------------------------------------------------------------------
    1          6             0        1.588651   -0.751138    0.037868
    2          1             0        2.312531   -0.412887   -0.707221
    3          1             0        2.030576   -0.618752    1.032423
    4          1             0        1.406510   -1.814192   -0.119986
    5          7             0        0.345778   -0.019053   -0.098869
    6          6             0        0.406918    1.428191    0.005978
    7          1             0        1.179258    1.813027   -0.662524
    8          1             0       -0.560343    1.838536   -0.272594
    9          1             0        0.640391    1.745566    1.028796
   10          6             0       -0.855755   -0.650386   -0.022715
   11          1             0       -0.748607   -1.749520   -0.049119
   12          8             0       -1.939956   -0.103551    0.039441
 ---------------------------------------------------------------------
 Rotational constants (GHZ):      8.9316605      4.2106513      2.9748914
 Standard basis: TZVP (5D, 7F)
 There are   137 symmetry adapted basis functions of A   symmetry.
 Integral buffers will be    131072 words long.
 Raffenetti 2 integral format.
 Two-electron integral symmetry is turned on.
   137 basis functions,   231 primitive gaussians,   142 cartesian basis functions
    20 alpha electrons       20 beta electrons
       nuclear repulsion energy       181.7594199362 Hartrees.
 NAtoms=   12 NActive=   12 NUniq=   12 SFac= 7.50D-01 NAtFMM=   80 NAOKFM=F Big=F
 One-electron integrals computed using PRISM.
 NBasis=   137 RedAO= T  NBF=   137
 NBsUse=   137 1.00D-06 NBFU=   137
 Initial guess read from the read-write file:
 Initial guess orbital symmetries:
       Occupied  (A) (A) (A) (A) (A) (A) (A) (A) (A) (A) (A) (A)
                 (A) (A) (A) (A) (A) (A) (A) (A)
       Virtual   (A) (A) (A) (A) (A) (A) (A) (A) (A) (A) (A) (A)
                 (A) (A) (A) (A) (A) (A) (A) (A) (A) (A) (A) (A)
                 (A) (A) (A) (A) (A) (A) (A) (A) (A) (A) (A) (A)
                 (A) (A) (A) (A) (A) (A) (A) (A) (A) (A) (A) (A)
                 (A) (A) (A) (A) (A) (A) (A) (A) (A) (A) (A) (A)
                 (A) (A) (A) (A) (A) (A) (A) (A) (A) (A) (A) (A)
                 (A) (A) (A) (A) (A) (A) (A) (A) (A) (A) (A) (A)
                 (A) (A) (A) (A) (A) (A) (A) (A) (A) (A) (A) (A)
                 (A) (A) (A) (A) (A) (A) (A) (A) (A) (A) (A) (A)
                 (A) (A) (A) (A) (A) (A) (A) (A) (A)
 Harris functional with IExCor=  402 diagonalized for initial guess.
 ExpMin= 9.52D-02 ExpMax= 2.70D+04 ExpMxC= 9.22D+02 IAcc=2 IRadAn=         4 AccDes= 0.00D+00
 HarFok:  IExCor= 402 AccDes= 0.00D+00 IRadAn=         4 IDoV=1
 ScaDFX=  1.000000  1.000000  1.000000  1.000000
 Requested convergence on RMS density matrix=1.00D-08 within 128 cycles.
 Requested convergence on MAX density matrix=1.00D-06.
 Requested convergence on             energy=1.00D-06.
 No special actions if energy rises.
 Keep R1 integrals in memory in canonical form, NReq=    54018915.
 Integral accuracy reduced to 1.0D-05 until final iterations.
 Initial convergence to 1.0D-05 achieved.  Increase integral accuracy.
 SCF Done:  E(RB+HF-LYP) =  -248.604740010     A.U. after   12 cycles
             Convg  =    0.3951D-08             -V/T =  2.0048
             S**2   =   0.0000
 Range of M.O.s used for correlation:     1   137
 NBasis=   137 NAE=    20 NBE=    20 NFC=     0 NFV=     0
 NROrb=    137 NOA=    20 NOB=    20 NVA=   117 NVB=   117

 **** Warning!!: The largest alpha MO coefficient is  0.11867946D+02

 Symmetrizing basis deriv contribution to polar:
 IMax=3 JMax=2 DiffMx= 0.00D+00
 G2DrvN: will do   13 centers at a time, making    1 passes doing MaxLOS=2.
 FoFDir/FoFCou used for L=0 through L=2.
 DoAtom=TTTTTTTTTTTT
          Differentiating once with respect to electric field.
                with respect to dipole field.
          Differentiating once with respect to nuclear coordinates.
          Store integrals in memory, NReq=    52370486.
          There are  39 degrees of freedom in the 1st order CPHF.
    36 vectors were produced by pass  0.
 AX will form  36 AO Fock derivatives at one time.
    36 vectors were produced by pass  1.
    36 vectors were produced by pass  2.
    36 vectors were produced by pass  3.
    36 vectors were produced by pass  4.
    21 vectors were produced by pass  5.
     4 vectors were produced by pass  6.
     1 vectors were produced by pass  7.
 Inv2:  IOpt= 1 Iter= 1 AM= 2.27D-15 Conv= 1.00D-12.
 Inverted reduced A of dimension  206 with in-core refinement.
 Isotropic polarizability for W=    0.000000       48.06 Bohr**3.
 End of Minotr Frequency-dependent properties file   721 does not exist.
 ***** Axes restored to original set *****
 -------------------------------------------------------------------
 Center     Atomic                   Forces (Hartrees/Bohr)
 Number     Number              X              Y              Z
 -------------------------------------------------------------------
    1          6          -0.001063125   -0.000929807    0.000214965
    2          1          -0.000236110   -0.000115023   -0.000014908
    3          1           0.000141502   -0.000104869   -0.000256440
    4          1          -0.000077940    0.000070562    0.000220021
    5          7           0.001711824    0.001041943    0.002585534
    6          6           0.000915008   -0.000185263   -0.000427272
    7          1           0.000146548   -0.000032033   -0.000435809
    8          1           0.000196929    0.000043724   -0.000034193
    9          1          -0.000235968   -0.000238972    0.000011948
   10          6          -0.001072881    0.000024474   -0.001764141
   11          1          -0.000085217    0.000352972   -0.000008732
   12          8          -0.000340568    0.000072293   -0.000090971
 -------------------------------------------------------------------
 Cartesian Forces:  Max     0.002585534 RMS     0.000724838

 GradGradGradGradGradGradGradGradGradGradGradGradGradGradGradGradGradGrad
 Berny optimization.
 Internal  Forces:  Max     0.001850849 RMS     0.000464775
 Search for a local minimum.
 Step number   6 out of a maximum of  55
 All quantities printed in internal units (Hartrees-Bohrs-Radians)
 Second derivative matrix not updated -- analytic derivatives used.
 Trust test= 1.06D+00 RLast= 6.36D-01 DXMaxT set to 1.00D+00
     Eigenvalues ---    0.00108   0.00226   0.00550   0.01777   0.06072
     Eigenvalues ---    0.06151   0.06201   0.06228   0.08398   0.12717
     Eigenvalues ---    0.13189   0.14775   0.16008   0.16875   0.17398
     Eigenvalues ---    0.17776   0.21315   0.21638   0.26104   0.31586
     Eigenvalues ---    0.31956   0.32228   0.33071   0.33416   0.34162
     Eigenvalues ---    0.34931   0.36667   0.38160   0.44960   0.82294
     Eigenvalues --- 1000.000001000.000001000.000001000.000001000.00000
     Eigenvalues --- 1000.000001000.000001000.000001000.000001000.00000
     Eigenvalues --- 1000.000001000.000001000.000001000.000001000.00000
 RFO step:  Lambda=-4.96388383D-04.
 Quartic linear search produced a step of  0.82320.
 Iteration  1 RMS(Cart)=  0.10419402 RMS(Int)=  0.04264283
 Iteration  2 RMS(Cart)=  0.04536348 RMS(Int)=  0.00297878
 Iteration  3 RMS(Cart)=  0.00164284 RMS(Int)=  0.00262971
 Iteration  4 RMS(Cart)=  0.00000139 RMS(Int)=  0.00262971
 Iteration  5 RMS(Cart)=  0.00000000 RMS(Int)=  0.00262971
 Variable       Old X    -DE/DX   Delta X   Delta X   Delta X     New X
                                 (Linear)    (Quad)   (Total)
    R1        2.06454   0.00007   0.00233   0.00108   0.00341   2.06795
    R2        2.07178  -0.00021  -0.00177  -0.00036  -0.00213   2.06966
    R3        2.05987   0.00009  -0.00053   0.00044  -0.00009   2.05978
    R4        2.73807   0.00124   0.00047  -0.00380  -0.00333   2.73474
    R5        2.74450   0.00116   0.00176  -0.00491  -0.00315   2.74134
    R6        2.56896   0.00185   0.00330  -0.00349  -0.00019   2.56877
    R7        2.06275   0.00011   0.00167   0.00263   0.00431   2.06705
    R8        2.05414   0.00010  -0.00024   0.00019  -0.00005   2.05409
    R9        2.07129  -0.00020  -0.00117  -0.00070  -0.00187   2.06942
   R10        2.08750   0.00008   0.00109  -0.00129  -0.00021   2.08730
   R11        2.29770  -0.00003   0.00442  -0.00418   0.00024   2.29794
    A1        1.89042  -0.00001  -0.00068  -0.00063  -0.00127   1.88915
    A2        1.89009  -0.00014   0.00441  -0.00231   0.00206   1.89215
    A3        1.92577   0.00020   0.00818   0.00224   0.01042   1.93619
    A4        1.89282  -0.00001  -0.00218   0.00153  -0.00071   1.89211
    A5        1.95020  -0.00024  -0.00703  -0.00300  -0.01004   1.94016
    A6        1.91320   0.00019  -0.00243   0.00213  -0.00035   1.91285
    A7        2.04943   0.00056   0.00764   0.00137  -0.00113   2.04830
    A8        2.11557  -0.00053   0.01892   0.00148   0.01035   2.12592
    A9        2.08972   0.00010   0.02087   0.00684   0.01771   2.10743
   A10        1.91441   0.00025   0.00574   0.00844   0.01422   1.92864
   A11        1.89676   0.00023  -0.00570  -0.00377  -0.00948   1.88728
   A12        1.94430  -0.00027  -0.00368  -0.00639  -0.01008   1.93422
   A13        1.91726  -0.00030   0.00251  -0.00509  -0.00254   1.91472
   A14        1.89515   0.00004  -0.00418   0.00061  -0.00353   1.89162
   A15        1.89587   0.00004   0.00541   0.00610   0.01147   1.90734
   A16        1.95521   0.00017   0.00824  -0.01148  -0.00337   1.95185
   A17        2.19213   0.00031   0.01111  -0.00440   0.00659   2.19872
   A18        2.13555  -0.00048  -0.01959   0.01673  -0.00298   2.13257
    D1       -1.00346   0.00013  -0.04131  -0.02041  -0.06226  -1.06571
    D2        2.39295  -0.00045  -0.19454  -0.06397  -0.25792   2.13503
    D3        1.10084   0.00010  -0.04123  -0.02169  -0.06352   1.03733
    D4       -1.78594  -0.00049  -0.19445  -0.06525  -0.25918  -2.04512
    D5       -3.08351   0.00006  -0.05023  -0.02028  -0.07105   3.12863
    D6        0.31290  -0.00052  -0.20345  -0.06384  -0.26672   0.04618
    D7        0.88977   0.00002   0.03967   0.13715   0.17688   1.06665
    D8        2.98607  -0.00005   0.04271   0.13369   0.17643  -3.12069
    D9       -1.20898  -0.00002   0.04345   0.13490   0.17844  -1.03054
   D10       -2.50270   0.00050   0.19009   0.17924   0.36927  -2.13343
   D11       -0.40640   0.00042   0.19313   0.17578   0.36882  -0.03758
   D12        1.68173   0.00046   0.19387   0.17699   0.37084   2.05256
   D13       -0.19357   0.00051   0.11242   0.04251   0.15608  -0.03748
   D14        2.97377   0.00042   0.13459   0.00516   0.14090   3.11467
   D15       -3.07456  -0.00015  -0.04100  -0.00124  -0.04339  -3.11795
   D16        0.09277  -0.00024  -0.01883  -0.03859  -0.05857   0.03420
         Item               Value     Threshold  Converged?
 Maximum Force            0.001851     0.000015     NO 
 RMS     Force            0.000465     0.000010     NO 
 Maximum Displacement     0.374567     0.000060     NO 
 RMS     Displacement     0.143694     0.000040     NO 
 Predicted change in Energy=-5.188696D-04
 GradGradGradGradGradGradGradGradGradGradGradGradGradGradGradGradGradGrad

                          Input orientation:                          
 ---------------------------------------------------------------------
 Center     Atomic     Atomic              Coordinates (Angstroms)
 Number     Number      Type              X           Y           Z
 ---------------------------------------------------------------------
    1          6             0       -2.973523   -0.734036    0.083279
    2          1             0       -2.862195   -1.794691   -0.161942
    3          1             0       -2.523805   -0.560519    1.066713
    4          1             0       -4.037330   -0.504992    0.145979
    5          7             0       -2.356613    0.097895   -0.927457
    6          6             0       -0.930109   -0.058252   -1.139838
    7          1             0       -0.700035   -1.078078   -1.461557
    8          1             0       -0.623369    0.646522   -1.908424
    9          1             0       -0.374638    0.146857   -0.218640
   10          6             0       -3.061392    1.040555   -1.607505
   11          1             0       -4.126677    1.046963   -1.315689
   12          8             0       -2.615898    1.796248   -2.449621
 ---------------------------------------------------------------------
                    Distance matrix (angstroms):
                    1          2          3          4          5
     1  C    0.000000
     2  H    1.094311   0.000000
     3  H    1.095216   1.774058   0.000000
     4  H    1.089989   1.771745   1.772454   0.000000
     5  N    1.447161   2.103214   2.106698   2.083398   0.000000
     6  C    2.475528   2.775690   2.767852   3.392304   1.450655
     7  H    2.770132   2.622493   3.160087   3.748351   2.100577
     8  H    3.375804   3.744605   3.730958   4.147492   2.065774
     9  H    2.760676   3.156067   2.602197   3.738069   2.105479
    10  C    2.452681   3.188723   3.162891   2.532959   1.359333
    11  H    2.541423   3.317385   3.290750   2.133781   2.045624
    12  O    3.598030   4.264854   4.234080   3.748776   2.295346
                    6          7          8          9         10
     6  C    0.000000
     7  H    1.093838   0.000000
     8  H    1.086978   1.783203   0.000000
     9  H    1.095090   1.775159   1.779580   0.000000
    10  C    2.443043   3.175832   2.487925   3.153774   0.000000
    11  H    3.386808   4.034718   3.575592   4.011421   1.104550
    12  O    2.827824   3.592847   2.363247   3.566653   1.216016
                   11         12
    11  H    0.000000
    12  O    2.032162   0.000000
 Stoichiometry    C3H7NO
 Framework group  C1[X(C3H7NO)]
 Deg. of freedom    30
 Full point group                 C1
 Largest Abelian subgroup         C1      NOp   1
 Largest concise Abelian subgroup C1      NOp   1
                         Standard orientation:                         
 ---------------------------------------------------------------------
 Center     Atomic     Atomic              Coordinates (Angstroms)
 Number     Number      Type              X           Y           Z
 ---------------------------------------------------------------------
    1          6             0        1.581402   -0.767866    0.006185
    2          1             0        2.199359   -0.533038   -0.865882
    3          1             0        2.160067   -0.540120    0.907726
    4          1             0        1.364651   -1.836047   -0.003032
    5          7             0        0.342263   -0.020856   -0.021860
    6          6             0        0.435707    1.426584    0.002374
    7          1             0        0.982273    1.789918   -0.872688
    8          1             0       -0.573293    1.830840   -0.001855
    9          1             0        0.958269    1.767926    0.902173
   10          6             0       -0.867912   -0.639579   -0.000753
   11          1             0       -0.766942   -1.739503    0.000458
   12          8             0       -1.951927   -0.088602    0.004911
 ---------------------------------------------------------------------
 Rotational constants (GHZ):      8.9480374      4.1820152      2.9560837
 Standard basis: TZVP (5D, 7F)
 There are   137 symmetry adapted basis functions of A   symmetry.
 Integral buffers will be    131072 words long.
 Raffenetti 2 integral format.
 Two-electron integral symmetry is turned on.
   137 basis functions,   231 primitive gaussians,   142 cartesian basis functions
    20 alpha electrons       20 beta electrons
       nuclear repulsion energy       181.6142753199 Hartrees.
 NAtoms=   12 NActive=   12 NUniq=   12 SFac= 7.50D-01 NAtFMM=   80 NAOKFM=F Big=F
 One-electron integrals computed using PRISM.
 NBasis=   137 RedAO= T  NBF=   137
 NBsUse=   137 1.00D-06 NBFU=   137
 Initial guess read from the read-write file:
 Initial guess orbital symmetries:
       Occupied  (A) (A) (A) (A) (A) (A) (A) (A) (A) (A) (A) (A)
                 (A) (A) (A) (A) (A) (A) (A) (A)
       Virtual   (A) (A) (A) (A) (A) (A) (A) (A) (A) (A) (A) (A)
                 (A) (A) (A) (A) (A) (A) (A) (A) (A) (A) (A) (A)
                 (A) (A) (A) (A) (A) (A) (A) (A) (A) (A) (A) (A)
                 (A) (A) (A) (A) (A) (A) (A) (A) (A) (A) (A) (A)
                 (A) (A) (A) (A) (A) (A) (A) (A) (A) (A) (A) (A)
                 (A) (A) (A) (A) (A) (A) (A) (A) (A) (A) (A) (A)
                 (A) (A) (A) (A) (A) (A) (A) (A) (A) (A) (A) (A)
                 (A) (A) (A) (A) (A) (A) (A) (A) (A) (A) (A) (A)
                 (A) (A) (A) (A) (A) (A) (A) (A) (A) (A) (A) (A)
                 (A) (A) (A) (A) (A) (A) (A) (A) (A)
 Harris functional with IExCor=  402 diagonalized for initial guess.
 ExpMin= 9.52D-02 ExpMax= 2.70D+04 ExpMxC= 9.22D+02 IAcc=2 IRadAn=         4 AccDes= 0.00D+00
 HarFok:  IExCor= 402 AccDes= 0.00D+00 IRadAn=         4 IDoV=1
 ScaDFX=  1.000000  1.000000  1.000000  1.000000
 Requested convergence on RMS density matrix=1.00D-08 within 128 cycles.
 Requested convergence on MAX density matrix=1.00D-06.
 Requested convergence on             energy=1.00D-06.
 No special actions if energy rises.
 Keep R1 integrals in memory in canonical form, NReq=    54018915.
 Integral accuracy reduced to 1.0D-05 until final iterations.
 Initial convergence to 1.0D-05 achieved.  Increase integral accuracy.
 SCF Done:  E(RB+HF-LYP) =  -248.605274312     A.U. after   12 cycles
             Convg  =    0.4156D-08             -V/T =  2.0048
             S**2   =   0.0000
 Range of M.O.s used for correlation:     1   137
 NBasis=   137 NAE=    20 NBE=    20 NFC=     0 NFV=     0
 NROrb=    137 NOA=    20 NOB=    20 NVA=   117 NVB=   117

 **** Warning!!: The largest alpha MO coefficient is  0.12283692D+02

 Symmetrizing basis deriv contribution to polar:
 IMax=3 JMax=2 DiffMx= 0.00D+00
 G2DrvN: will do   13 centers at a time, making    1 passes doing MaxLOS=2.
 FoFDir/FoFCou used for L=0 through L=2.
 DoAtom=TTTTTTTTTTTT
          Differentiating once with respect to electric field.
                with respect to dipole field.
          Differentiating once with respect to nuclear coordinates.
          Store integrals in memory, NReq=    52370486.
          There are  39 degrees of freedom in the 1st order CPHF.
    36 vectors were produced by pass  0.
 AX will form  36 AO Fock derivatives at one time.
    36 vectors were produced by pass  1.
    36 vectors were produced by pass  2.
    36 vectors were produced by pass  3.
    36 vectors were produced by pass  4.
    22 vectors were produced by pass  5.
     4 vectors were produced by pass  6.
     1 vectors were produced by pass  7.
 Inv2:  IOpt= 1 Iter= 1 AM= 2.53D-15 Conv= 1.00D-12.
 Inverted reduced A of dimension  207 with in-core refinement.
 Isotropic polarizability for W=    0.000000       48.21 Bohr**3.
 End of Minotr Frequency-dependent properties file   721 does not exist.
 ***** Axes restored to original set *****
 -------------------------------------------------------------------
 Center     Atomic                   Forces (Hartrees/Bohr)
 Number     Number              X              Y              Z
 -------------------------------------------------------------------
    1          6          -0.001230415   -0.000605785    0.000658859
    2          1          -0.000064200    0.000023665    0.000029252
    3          1          -0.000082467    0.000067764   -0.000282954
    4          1          -0.000126491   -0.000206915    0.000141558
    5          7           0.001089655    0.000305055    0.001742463
    6          6           0.000769198    0.000403516   -0.000655627
    7          1           0.000209752    0.000185197   -0.000405844
    8          1           0.000674748   -0.000341215   -0.000415538
    9          1          -0.000536091    0.000104153   -0.000212380
   10          6          -0.001006391   -0.000025028   -0.001138137
   11          1          -0.000113234    0.000207647    0.000037211
   12          8           0.000415935   -0.000118056    0.000501137
 -------------------------------------------------------------------
 Cartesian Forces:  Max     0.001742463 RMS     0.000580390

 GradGradGradGradGradGradGradGradGradGradGradGradGradGradGradGradGradGrad
 Berny optimization.
 Internal  Forces:  Max     0.001524579 RMS     0.000528129
 Search for a local minimum.
 Step number   7 out of a maximum of  55
 All quantities printed in internal units (Hartrees-Bohrs-Radians)
 Second derivative matrix not updated -- analytic derivatives used.
 Trust test= 1.03D+00 RLast= 8.79D-01 DXMaxT set to 1.00D+00
     Eigenvalues ---    0.00131   0.00208   0.00524   0.01812   0.06081
     Eigenvalues ---    0.06146   0.06211   0.06276   0.08395   0.12737
     Eigenvalues ---    0.13211   0.14803   0.15952   0.16868   0.17444
     Eigenvalues ---    0.17905   0.21686   0.21907   0.26285   0.31638
     Eigenvalues ---    0.32274   0.32420   0.32590   0.32908   0.34198
     Eigenvalues ---    0.34986   0.36813   0.38481   0.45051   0.82150
     Eigenvalues --- 1000.000001000.000001000.000001000.000001000.00000
     Eigenvalues --- 1000.000001000.000001000.000001000.000001000.00000
     Eigenvalues --- 1000.000001000.000001000.000001000.000001000.00000
 RFO step:  Lambda=-8.94985419D-05.
 Quintic linear search produced a step of  0.03030.
 Iteration  1 RMS(Cart)=  0.01156797 RMS(Int)=  0.00020261
 Iteration  2 RMS(Cart)=  0.00022848 RMS(Int)=  0.00015655
 Iteration  3 RMS(Cart)=  0.00000001 RMS(Int)=  0.00015655
 Variable       Old X    -DE/DX   Delta X   Delta X   Delta X     New X
                                 (Linear)    (Quad)   (Total)
    R1        2.06795  -0.00004   0.00010   0.00011   0.00022   2.06816
    R2        2.06966  -0.00028  -0.00006  -0.00129  -0.00135   2.06831
    R3        2.05978   0.00009   0.00000   0.00005   0.00004   2.05983
    R4        2.73474   0.00144  -0.00010   0.00358   0.00348   2.73822
    R5        2.74134   0.00131  -0.00010   0.00318   0.00309   2.74443
    R6        2.56877   0.00071  -0.00001   0.00189   0.00189   2.57066
    R7        2.06705  -0.00001   0.00013   0.00028   0.00041   2.06747
    R8        2.05409   0.00027   0.00000   0.00044   0.00043   2.05453
    R9        2.06942  -0.00043  -0.00006  -0.00179  -0.00184   2.06758
   R10        2.08730   0.00012  -0.00001   0.00014   0.00013   2.08743
   R11        2.29794  -0.00027   0.00001  -0.00022  -0.00022   2.29772
    A1        1.88915   0.00006  -0.00004   0.00081   0.00077   1.88992
    A2        1.89215  -0.00019   0.00006  -0.00031  -0.00025   1.89191
    A3        1.93619   0.00004   0.00032   0.00089   0.00121   1.93739
    A4        1.89211  -0.00007  -0.00002  -0.00014  -0.00016   1.89195
    A5        1.94016  -0.00024  -0.00030  -0.00201  -0.00232   1.93784
    A6        1.91285   0.00040  -0.00001   0.00077   0.00076   1.91361
    A7        2.04830   0.00152  -0.00003   0.00765   0.00702   2.05533
    A8        2.12592  -0.00042   0.00031  -0.00112  -0.00140   2.12452
    A9        2.10743  -0.00110   0.00054  -0.00404  -0.00410   2.10333
   A10        1.92864   0.00029   0.00043   0.00133   0.00176   1.93039
   A11        1.88728   0.00103  -0.00029   0.00442   0.00414   1.89141
   A12        1.93422  -0.00071  -0.00031  -0.00329  -0.00359   1.93063
   A13        1.91472  -0.00077  -0.00008  -0.00595  -0.00603   1.90869
   A14        1.89162   0.00022  -0.00011   0.00258   0.00247   1.89410
   A15        1.90734  -0.00008   0.00035   0.00080   0.00115   1.90849
   A16        1.95185   0.00057  -0.00010   0.00239   0.00227   1.95411
   A17        2.19872  -0.00084   0.00020  -0.00292  -0.00274   2.19598
   A18        2.13257   0.00027  -0.00009   0.00062   0.00052   2.13309
    D1       -1.06571   0.00015  -0.00189   0.01624   0.01440  -1.05131
    D2        2.13503  -0.00003  -0.00782  -0.03145  -0.03931   2.09572
    D3        1.03733   0.00009  -0.00192   0.01651   0.01463   1.05196
    D4       -2.04512  -0.00009  -0.00785  -0.03117  -0.03908  -2.08420
    D5        3.12863   0.00011  -0.00215   0.01556   0.01346  -3.14110
    D6        0.04618  -0.00007  -0.00808  -0.03212  -0.04025   0.00593
    D7        1.06665  -0.00010   0.00536  -0.02142  -0.01608   1.05057
    D8       -3.12069  -0.00022   0.00535  -0.02516  -0.01983  -3.14052
    D9       -1.03054  -0.00010   0.00541  -0.02338  -0.01798  -1.04853
   D10       -2.13343   0.00011   0.01119   0.02583   0.03704  -2.09639
   D11       -0.03758  -0.00002   0.01118   0.02209   0.03328  -0.00430
   D12        2.05256   0.00011   0.01124   0.02388   0.03513   2.08770
   D13       -0.03748   0.00028   0.00473   0.02916   0.03380  -0.00369
   D14        3.11467  -0.00020   0.00427   0.01961   0.02379   3.13846
   D15       -3.11795   0.00000  -0.00131  -0.02052  -0.02174  -3.13969
   D16        0.03420  -0.00048  -0.00177  -0.03006  -0.03175   0.00245
         Item               Value     Threshold  Converged?
 Maximum Force            0.001525     0.000015     NO 
 RMS     Force            0.000528     0.000010     NO 
 Maximum Displacement     0.034649     0.000060     NO 
 RMS     Displacement     0.011548     0.000040     NO 
 Predicted change in Energy=-4.758910D-05
 GradGradGradGradGradGradGradGradGradGradGradGradGradGradGradGradGradGrad

                          Input orientation:                          
 ---------------------------------------------------------------------
 Center     Atomic     Atomic              Coordinates (Angstroms)
 Number     Number      Type              X           Y           Z
 ---------------------------------------------------------------------
    1          6             0       -2.976360   -0.733689    0.088255
    2          1             0       -2.869030   -1.791527   -0.171020
    3          1             0       -2.528561   -0.574652    1.074214
    4          1             0       -4.039392   -0.501143    0.151598
    5          7             0       -2.351470    0.111512   -0.909121
    6          6             0       -0.926918   -0.052988   -1.138773
    7          1             0       -0.705441   -1.072016   -1.469665
    8          1             0       -0.620511    0.650619   -1.908886
    9          1             0       -0.363509    0.144966   -0.222000
   10          6             0       -3.061688    1.036448   -1.609542
   11          1             0       -4.128203    1.042865   -1.321992
   12          8             0       -2.614498    1.784075   -2.457771
 ---------------------------------------------------------------------
                    Distance matrix (angstroms):
                    1          2          3          4          5
     1  C    0.000000
     2  H    1.094425   0.000000
     3  H    1.094501   1.774067   0.000000
     4  H    1.090013   1.771700   1.771789   0.000000
     5  N    1.449003   2.105759   2.106135   2.085558   0.000000
     6  C    2.483780   2.780443   2.781135   3.399029   1.452290
     7  H    2.774644   2.623984   3.168984   3.750949   2.103416
     8  H    3.384509   3.747012   3.747110   4.154624   2.070359
     9  H    2.774036   3.167055   2.624018   3.750886   2.103626
    10  C    2.454216   3.178664   3.175282   2.534108   1.360333
    11  H    2.543950   3.308177   3.304092   2.136192   2.048088
    12  O    3.598934   4.251935   4.248047   3.749847   2.294552
                    6          7          8          9         10
     6  C    0.000000
     7  H    1.094057   0.000000
     8  H    1.087208   1.779776   0.000000
     9  H    1.094116   1.776129   1.779697   0.000000
    10  C    2.442486   3.164978   2.489542   3.162306   0.000000
    11  H    3.388612   4.026143   3.578018   4.023571   1.104618
    12  O    2.821787   3.574648   2.358386   3.571037   1.215902
                   11         12
    11  H    0.000000
    12  O    2.032410   0.000000
 Stoichiometry    C3H7NO
 Framework group  C1[X(C3H7NO)]
 Deg. of freedom    30
 Full point group                 C1
 Largest Abelian subgroup         C1      NOp   1
 Largest concise Abelian subgroup C1      NOp   1
                         Standard orientation:                         
 ---------------------------------------------------------------------
 Center     Atomic     Atomic              Coordinates (Angstroms)
 Number     Number      Type              X           Y           Z
 ---------------------------------------------------------------------
    1          6             0        1.587635   -0.762807    0.000688
    2          1             0        2.187338   -0.527613   -0.884075
    3          1             0        2.182023   -0.530872    0.889981
    4          1             0        1.375191   -1.831913   -0.001953
    5          7             0        0.344053   -0.019095   -0.002070
    6          6             0        0.423080    1.431042    0.000193
    7          1             0        0.955032    1.789004   -0.886289
    8          1             0       -0.588550    1.829320   -0.001230
    9          1             0        0.951419    1.786689    0.889835
   10          6             0       -0.863750   -0.644965   -0.000335
   11          1             0       -0.759217   -1.744625   -0.000486
   12          8             0       -1.949174   -0.096994    0.000678
 ---------------------------------------------------------------------
 Rotational constants (GHZ):      8.9158961      4.1862544      2.9544835
 Standard basis: TZVP (5D, 7F)
 There are   137 symmetry adapted basis functions of A   symmetry.
 Integral buffers will be    131072 words long.
 Raffenetti 2 integral format.
 Two-electron integral symmetry is turned on.
   137 basis functions,   231 primitive gaussians,   142 cartesian basis functions
    20 alpha electrons       20 beta electrons
       nuclear repulsion energy       181.5334988072 Hartrees.
 NAtoms=   12 NActive=   12 NUniq=   12 SFac= 7.50D-01 NAtFMM=   80 NAOKFM=F Big=F
 One-electron integrals computed using PRISM.
 NBasis=   137 RedAO= T  NBF=   137
 NBsUse=   137 1.00D-06 NBFU=   137
 Initial guess read from the read-write file:
 Initial guess orbital symmetries:
       Occupied  (A) (A) (A) (A) (A) (A) (A) (A) (A) (A) (A) (A)
                 (A) (A) (A) (A) (A) (A) (A) (A)
       Virtual   (A) (A) (A) (A) (A) (A) (A) (A) (A) (A) (A) (A)
                 (A) (A) (A) (A) (A) (A) (A) (A) (A) (A) (A) (A)
                 (A) (A) (A) (A) (A) (A) (A) (A) (A) (A) (A) (A)
                 (A) (A) (A) (A) (A) (A) (A) (A) (A) (A) (A) (A)
                 (A) (A) (A) (A) (A) (A) (A) (A) (A) (A) (A) (A)
                 (A) (A) (A) (A) (A) (A) (A) (A) (A) (A) (A) (A)
                 (A) (A) (A) (A) (A) (A) (A) (A) (A) (A) (A) (A)
                 (A) (A) (A) (A) (A) (A) (A) (A) (A) (A) (A) (A)
                 (A) (A) (A) (A) (A) (A) (A) (A) (A) (A) (A) (A)
                 (A) (A) (A) (A) (A) (A) (A) (A) (A)
 Harris functional with IExCor=  402 diagonalized for initial guess.
 ExpMin= 9.52D-02 ExpMax= 2.70D+04 ExpMxC= 9.22D+02 IAcc=2 IRadAn=         4 AccDes= 0.00D+00
 HarFok:  IExCor= 402 AccDes= 0.00D+00 IRadAn=         4 IDoV=1
 ScaDFX=  1.000000  1.000000  1.000000  1.000000
 Requested convergence on RMS density matrix=1.00D-08 within 128 cycles.
 Requested convergence on MAX density matrix=1.00D-06.
 Requested convergence on             energy=1.00D-06.
 No special actions if energy rises.
 Keep R1 integrals in memory in canonical form, NReq=    54018915.
 Integral accuracy reduced to 1.0D-05 until final iterations.
 Initial convergence to 1.0D-05 achieved.  Increase integral accuracy.
 SCF Done:  E(RB+HF-LYP) =  -248.605322156     A.U. after   10 cycles
             Convg  =    0.9965D-08             -V/T =  2.0048
             S**2   =   0.0000
 Range of M.O.s used for correlation:     1   137
 NBasis=   137 NAE=    20 NBE=    20 NFC=     0 NFV=     0
 NROrb=    137 NOA=    20 NOB=    20 NVA=   117 NVB=   117

 **** Warning!!: The largest alpha MO coefficient is  0.12235725D+02

 Symmetrizing basis deriv contribution to polar:
 IMax=3 JMax=2 DiffMx= 0.00D+00
 G2DrvN: will do   13 centers at a time, making    1 passes doing MaxLOS=2.
 FoFDir/FoFCou used for L=0 through L=2.
 DoAtom=TTTTTTTTTTTT
          Differentiating once with respect to electric field.
                with respect to dipole field.
          Differentiating once with respect to nuclear coordinates.
          Store integrals in memory, NReq=    52370486.
          There are  39 degrees of freedom in the 1st order CPHF.
    36 vectors were produced by pass  0.
 AX will form  36 AO Fock derivatives at one time.
    36 vectors were produced by pass  1.
    36 vectors were produced by pass  2.
    36 vectors were produced by pass  3.
    36 vectors were produced by pass  4.
    22 vectors were produced by pass  5.
     4 vectors were produced by pass  6.
     1 vectors were produced by pass  7.
 Inv2:  IOpt= 1 Iter= 1 AM= 2.00D-15 Conv= 1.00D-12.
 Inverted reduced A of dimension  207 with in-core refinement.
 Isotropic polarizability for W=    0.000000       48.21 Bohr**3.
 End of Minotr Frequency-dependent properties file   721 does not exist.
 ***** Axes restored to original set *****
 -------------------------------------------------------------------
 Center     Atomic                   Forces (Hartrees/Bohr)
 Number     Number              X              Y              Z
 -------------------------------------------------------------------
    1          6          -0.000059161   -0.000037167    0.000016623
    2          1          -0.000011323   -0.000002435    0.000003708
    3          1          -0.000004512   -0.000000638   -0.000004714
    4          1          -0.000009187   -0.000003195    0.000004756
    5          7           0.000066660    0.000006300    0.000106956
    6          6           0.000063214    0.000008485   -0.000054863
    7          1          -0.000000068    0.000005810   -0.000004205
    8          1           0.000025748   -0.000012637   -0.000001377
    9          1          -0.000009332    0.000003909   -0.000006437
   10          6          -0.000057330    0.000033661   -0.000071307
   11          1          -0.000006601    0.000011030   -0.000007336
   12          8           0.000001891   -0.000013123    0.000018195
 -------------------------------------------------------------------
 Cartesian Forces:  Max     0.000106956 RMS     0.000033215

 GradGradGradGradGradGradGradGradGradGradGradGradGradGradGradGradGradGrad
 Berny optimization.
 Internal  Forces:  Max     0.000087329 RMS     0.000027503
 Search for a local minimum.
 Step number   8 out of a maximum of  55
 All quantities printed in internal units (Hartrees-Bohrs-Radians)
 Second derivative matrix not updated -- analytic derivatives used.
 Trust test= 1.01D+00 RLast= 1.16D-01 DXMaxT set to 1.00D+00
     Eigenvalues ---    0.00121   0.00202   0.00504   0.01808   0.06073
     Eigenvalues ---    0.06144   0.06207   0.06277   0.08413   0.12675
     Eigenvalues ---    0.13157   0.14749   0.15823   0.16820   0.17404
     Eigenvalues ---    0.17865   0.21534   0.21966   0.26429   0.31648
     Eigenvalues ---    0.32366   0.32496   0.32541   0.32913   0.34179
     Eigenvalues ---    0.34952   0.36557   0.38289   0.44873   0.82210
     Eigenvalues --- 1000.000001000.000001000.000001000.000001000.00000
     Eigenvalues --- 1000.000001000.000001000.000001000.000001000.00000
     Eigenvalues --- 1000.000001000.000001000.000001000.000001000.00000
 RFO step:  Lambda=-1.30887218D-07.
 Quintic linear search produced a step of  0.06329.
 Iteration  1 RMS(Cart)=  0.00172861 RMS(Int)=  0.00000867
 Iteration  2 RMS(Cart)=  0.00000312 RMS(Int)=  0.00000843
 Iteration  3 RMS(Cart)=  0.00000000 RMS(Int)=  0.00000843
 Variable       Old X    -DE/DX   Delta X   Delta X   Delta X     New X
                                 (Linear)    (Quad)   (Total)
    R1        2.06816   0.00000   0.00001   0.00005   0.00006   2.06822
    R2        2.06831  -0.00001  -0.00009   0.00000  -0.00008   2.06823
    R3        2.05983   0.00001   0.00000   0.00001   0.00001   2.05984
    R4        2.73822   0.00008   0.00022  -0.00003   0.00019   2.73841
    R5        2.74443   0.00009   0.00020   0.00003   0.00022   2.74465
    R6        2.57066   0.00008   0.00012   0.00009   0.00021   2.57087
    R7        2.06747   0.00000   0.00003   0.00000   0.00003   2.06749
    R8        2.05453   0.00000   0.00003  -0.00004  -0.00001   2.05452
    R9        2.06758  -0.00001  -0.00012   0.00003  -0.00008   2.06750
   R10        2.08743   0.00001   0.00001   0.00000   0.00001   2.08743
   R11        2.29772  -0.00002  -0.00001  -0.00002  -0.00004   2.29769
    A1        1.88992   0.00000   0.00005  -0.00003   0.00002   1.88994
    A2        1.89191  -0.00001  -0.00002   0.00000  -0.00002   1.89189
    A3        1.93739   0.00001   0.00008   0.00018   0.00026   1.93765
    A4        1.89195   0.00000  -0.00001  -0.00005  -0.00006   1.89189
    A5        1.93784   0.00000  -0.00015  -0.00004  -0.00018   1.93766
    A6        1.91361   0.00001   0.00005  -0.00007  -0.00002   1.91359
    A7        2.05533   0.00007   0.00044  -0.00004   0.00037   2.05570
    A8        2.12452  -0.00004  -0.00009  -0.00007  -0.00019   2.12432
    A9        2.10333  -0.00003  -0.00026   0.00013  -0.00016   2.10316
   A10        1.93039   0.00000   0.00011  -0.00004   0.00007   1.93046
   A11        1.89141   0.00004   0.00026  -0.00012   0.00014   1.89155
   A12        1.93063  -0.00001  -0.00023   0.00007  -0.00016   1.93047
   A13        1.90869  -0.00002  -0.00038   0.00022  -0.00016   1.90853
   A14        1.89410   0.00001   0.00016  -0.00008   0.00007   1.89417
   A15        1.90849  -0.00001   0.00007  -0.00004   0.00004   1.90853
   A16        1.95411   0.00002   0.00014  -0.00005   0.00009   1.95421
   A17        2.19598  -0.00002  -0.00017   0.00010  -0.00007   2.19591
   A18        2.13309   0.00000   0.00003  -0.00005  -0.00002   2.13307
    D1       -1.05131   0.00001   0.00091  -0.00129  -0.00037  -1.05169
    D2        2.09572  -0.00001  -0.00249  -0.00322  -0.00571   2.09001
    D3        1.05196   0.00001   0.00093  -0.00123  -0.00030   1.05166
    D4       -2.08420  -0.00001  -0.00247  -0.00316  -0.00564  -2.08983
    D5       -3.14110   0.00001   0.00085  -0.00136  -0.00050   3.14158
    D6        0.00593  -0.00001  -0.00255  -0.00329  -0.00584   0.00009
    D7        1.05057  -0.00001  -0.00102   0.00003  -0.00099   1.04957
    D8       -3.14052  -0.00001  -0.00126   0.00019  -0.00106  -3.14158
    D9       -1.04853  -0.00001  -0.00114   0.00011  -0.00103  -1.04955
   D10       -2.09639   0.00001   0.00234   0.00193   0.00428  -2.09212
   D11       -0.00430   0.00001   0.00211   0.00210   0.00421  -0.00009
   D12        2.08770   0.00001   0.00222   0.00202   0.00424   2.09194
   D13       -0.00369   0.00001   0.00214   0.00150   0.00363  -0.00006
   D14        3.13846   0.00000   0.00151   0.00158   0.00308   3.14154
   D15       -3.13969  -0.00001  -0.00138  -0.00049  -0.00186  -3.14155
   D16        0.00245  -0.00001  -0.00201  -0.00040  -0.00241   0.00005
         Item               Value     Threshold  Converged?
 Maximum Force            0.000087     0.000015     NO 
 RMS     Force            0.000028     0.000010     NO 
 Maximum Displacement     0.004424     0.000060     NO 
 RMS     Displacement     0.001729     0.000040     NO 
 Predicted change in Energy=-2.402022D-07
 GradGradGradGradGradGradGradGradGradGradGradGradGradGradGradGradGradGrad

                          Input orientation:                          
 ---------------------------------------------------------------------
 Center     Atomic     Atomic              Coordinates (Angstroms)
 Number     Number      Type              X           Y           Z
 ---------------------------------------------------------------------
    1          6             0       -2.976459   -0.733532    0.088605
    2          1             0       -2.870888   -1.791077   -0.172719
    3          1             0       -2.527808   -0.576993    1.074529
    4          1             0       -4.039109   -0.499536    0.153134
    5          7             0       -2.350938    0.112944   -0.907436
    6          6             0       -0.926558   -0.052346   -1.138324
    7          1             0       -0.705972   -1.071186   -1.470434
    8          1             0       -0.620089    0.651730   -1.907977
    9          1             0       -0.362504    0.144324   -0.221723
   10          6             0       -3.061854    1.035817   -1.610082
   11          1             0       -4.128439    1.042088   -1.322775
   12          8             0       -2.614962    1.782238   -2.459501
 ---------------------------------------------------------------------
                    Distance matrix (angstroms):
                    1          2          3          4          5
     1  C    0.000000
     2  H    1.094457   0.000000
     3  H    1.094458   1.774072   0.000000
     4  H    1.090020   1.771722   1.771722   0.000000
     5  N    1.449102   2.106052   2.106058   2.085632   0.000000
     6  C    2.484243   2.781366   2.781362   3.399385   1.452408
     7  H    2.774838   2.624723   3.168620   3.751341   2.103579
     8  H    3.384933   3.747602   3.747598   4.154911   2.070558
     9  H    2.774833   3.168623   2.624712   3.751333   2.103582
    10  C    2.454267   3.177075   3.177026   2.534021   1.360443
    11  H    2.543989   3.306189   3.306132   2.136093   2.048249
    12  O    3.598975   4.250112   4.250051   3.749740   2.294593
                    6          7          8          9         10
     6  C    0.000000
     7  H    1.094071   0.000000
     8  H    1.087204   1.779680   0.000000
     9  H    1.094072   1.776151   1.779680   0.000000
    10  C    2.442569   3.163723   2.489675   3.163667   0.000000
    11  H    3.388783   4.025048   3.578179   4.024993   1.104621
    12  O    2.821686   3.572748   2.358335   3.572671   1.215883
                   11         12
    11  H    0.000000
    12  O    2.032383   0.000000
 Stoichiometry    C3H7NO
 Framework group  C1[X(C3H7NO)]
 Deg. of freedom    30
 Full point group                 C1
 Largest Abelian subgroup         C1      NOp   1
 Largest concise Abelian subgroup C1      NOp   1
                         Standard orientation:                         
 ---------------------------------------------------------------------
 Center     Atomic     Atomic              Coordinates (Angstroms)
 Number     Number      Type              X           Y           Z
 ---------------------------------------------------------------------
    1          6             0        1.587840   -0.762717    0.000012
    2          1             0        2.184934   -0.529184   -0.886992
    3          1             0        2.184855   -0.529214    0.887079
    4          1             0        1.375376   -1.831830   -0.000015
    5          7             0        0.344160   -0.018971   -0.000038
    6          6             0        0.422640    1.431315    0.000004
    7          1             0        0.952675    1.788294   -0.888038
    8          1             0       -0.589084    1.829343   -0.000032
    9          1             0        0.952593    1.788251    0.888114
   10          6             0       -0.863609   -0.645150   -0.000006
   11          1             0       -0.758942   -1.744802   -0.000002
   12          8             0       -1.949094   -0.097343    0.000012
 ---------------------------------------------------------------------
 Rotational constants (GHZ):      8.9135622      4.1863595      2.9542786
 Standard basis: TZVP (5D, 7F)
 There are   137 symmetry adapted basis functions of A   symmetry.
 Integral buffers will be    131072 words long.
 Raffenetti 2 integral format.
 Two-electron integral symmetry is turned on.
   137 basis functions,   231 primitive gaussians,   142 cartesian basis functions
    20 alpha electrons       20 beta electrons
       nuclear repulsion energy       181.5264472672 Hartrees.
 NAtoms=   12 NActive=   12 NUniq=   12 SFac= 7.50D-01 NAtFMM=   80 NAOKFM=F Big=F
 One-electron integrals computed using PRISM.
 NBasis=   137 RedAO= T  NBF=   137
 NBsUse=   137 1.00D-06 NBFU=   137
 Initial guess read from the read-write file:
 Initial guess orbital symmetries:
       Occupied  (A) (A) (A) (A) (A) (A) (A) (A) (A) (A) (A) (A)
                 (A) (A) (A) (A) (A) (A) (A) (A)
       Virtual   (A) (A) (A) (A) (A) (A) (A) (A) (A) (A) (A) (A)
                 (A) (A) (A) (A) (A) (A) (A) (A) (A) (A) (A) (A)
                 (A) (A) (A) (A) (A) (A) (A) (A) (A) (A) (A) (A)
                 (A) (A) (A) (A) (A) (A) (A) (A) (A) (A) (A) (A)
                 (A) (A) (A) (A) (A) (A) (A) (A) (A) (A) (A) (A)
                 (A) (A) (A) (A) (A) (A) (A) (A) (A) (A) (A) (A)
                 (A) (A) (A) (A) (A) (A) (A) (A) (A) (A) (A) (A)
                 (A) (A) (A) (A) (A) (A) (A) (A) (A) (A) (A) (A)
                 (A) (A) (A) (A) (A) (A) (A) (A) (A) (A) (A) (A)
                 (A) (A) (A) (A) (A) (A) (A) (A) (A)
 Requested convergence on RMS density matrix=1.00D-08 within 128 cycles.
 Requested convergence on MAX density matrix=1.00D-06.
 Requested convergence on             energy=1.00D-06.
 No special actions if energy rises.
 Keep R1 integrals in memory in canonical form, NReq=    54018915.
 SCF Done:  E(RB+HF-LYP) =  -248.605322383     A.U. after    7 cycles
             Convg  =    0.9028D-08             -V/T =  2.0048
             S**2   =   0.0000
 Range of M.O.s used for correlation:     1   137
 NBasis=   137 NAE=    20 NBE=    20 NFC=     0 NFV=     0
 NROrb=    137 NOA=    20 NOB=    20 NVA=   117 NVB=   117

 **** Warning!!: The largest alpha MO coefficient is  0.12232287D+02

 Symmetrizing basis deriv contribution to polar:
 IMax=3 JMax=2 DiffMx= 0.00D+00
 G2DrvN: will do   13 centers at a time, making    1 passes doing MaxLOS=2.
 FoFDir/FoFCou used for L=0 through L=2.
 DoAtom=TTTTTTTTTTTT
          Differentiating once with respect to electric field.
                with respect to dipole field.
          Differentiating once with respect to nuclear coordinates.
          Store integrals in memory, NReq=    52370486.
          There are  39 degrees of freedom in the 1st order CPHF.
    36 vectors were produced by pass  0.
 AX will form  36 AO Fock derivatives at one time.
    36 vectors were produced by pass  1.
    36 vectors were produced by pass  2.
    36 vectors were produced by pass  3.
    36 vectors were produced by pass  4.
    22 vectors were produced by pass  5.
     4 vectors were produced by pass  6.
     1 vectors were produced by pass  7.
 Inv2:  IOpt= 1 Iter= 1 AM= 2.20D-15 Conv= 1.00D-12.
 Inverted reduced A of dimension  207 with in-core refinement.
 Isotropic polarizability for W=    0.000000       48.21 Bohr**3.
 End of Minotr Frequency-dependent properties file   721 does not exist.
 ***** Axes restored to original set *****
 -------------------------------------------------------------------
 Center     Atomic                   Forces (Hartrees/Bohr)
 Number     Number              X              Y              Z
 -------------------------------------------------------------------
    1          6          -0.000004329   -0.000001037    0.000001533
    2          1          -0.000001999    0.000000631    0.000000033
    3          1          -0.000001863    0.000000702   -0.000000438
    4          1          -0.000001372    0.000001306   -0.000001069
    5          7           0.000003788   -0.000001050    0.000002503
    6          6           0.000003171   -0.000001461   -0.000000525
    7          1          -0.000000385   -0.000001367    0.000001457
    8          1           0.000002124   -0.000001715    0.000001182
    9          1          -0.000000369   -0.000001304    0.000001436
   10          6          -0.000001286    0.000004206   -0.000003860
   11          1           0.000000882    0.000001697   -0.000002232
   12          8           0.000001638   -0.000000607   -0.000000021
 -------------------------------------------------------------------
 Cartesian Forces:  Max     0.000004329 RMS     0.000001918

 GradGradGradGradGradGradGradGradGradGradGradGradGradGradGradGradGradGrad
 Berny optimization.
 Internal  Forces:  Max     0.000006057 RMS     0.000001331
 Search for a local minimum.
 Step number   9 out of a maximum of  55
 All quantities printed in internal units (Hartrees-Bohrs-Radians)
 Second derivative matrix not updated -- analytic derivatives used.
 Trust test= 9.43D-01 RLast= 1.37D-02 DXMaxT set to 1.00D+00
     Eigenvalues ---    0.00121   0.00202   0.00503   0.01808   0.06073
     Eigenvalues ---    0.06144   0.06207   0.06277   0.08412   0.12671
     Eigenvalues ---    0.13153   0.14746   0.15817   0.16818   0.17402
     Eigenvalues ---    0.17862   0.21525   0.21967   0.26432   0.31647
     Eigenvalues ---    0.32368   0.32491   0.32544   0.32914   0.34177
     Eigenvalues ---    0.34952   0.36543   0.38276   0.44849   0.82217
     Eigenvalues --- 1000.000001000.000001000.000001000.000001000.00000
     Eigenvalues --- 1000.000001000.000001000.000001000.000001000.00000
     Eigenvalues --- 1000.000001000.000001000.000001000.000001000.00000
 RFO step:  Lambda= 0.00000000D+00.
 Quintic linear search produced a step of  0.02142.
 Iteration  1 RMS(Cart)=  0.00002719 RMS(Int)=  0.00000002
 Iteration  2 RMS(Cart)=  0.00000000 RMS(Int)=  0.00000002
 Variable       Old X    -DE/DX   Delta X   Delta X   Delta X     New X
                                 (Linear)    (Quad)   (Total)
    R1        2.06822   0.00000   0.00000   0.00000   0.00000   2.06822
    R2        2.06823   0.00000   0.00000   0.00000   0.00000   2.06822
    R3        2.05984   0.00000   0.00000   0.00000   0.00000   2.05984
    R4        2.73841   0.00000   0.00000   0.00001   0.00001   2.73842
    R5        2.74465   0.00000   0.00000   0.00000   0.00001   2.74466
    R6        2.57087   0.00001   0.00000   0.00001   0.00001   2.57088
    R7        2.06749   0.00000   0.00000   0.00000   0.00000   2.06749
    R8        2.05452   0.00000   0.00000   0.00000   0.00000   2.05452
    R9        2.06750   0.00000   0.00000   0.00000   0.00000   2.06749
   R10        2.08743   0.00000   0.00000   0.00000   0.00000   2.08743
   R11        2.29769   0.00000   0.00000   0.00000   0.00000   2.29768
    A1        1.88994   0.00000   0.00000   0.00000   0.00000   1.88994
    A2        1.89189   0.00000   0.00000   0.00000   0.00000   1.89189
    A3        1.93765   0.00000   0.00001   0.00000   0.00000   1.93765
    A4        1.89189   0.00000   0.00000   0.00000   0.00000   1.89189
    A5        1.93766   0.00000   0.00000   0.00000  -0.00001   1.93765
    A6        1.91359   0.00000   0.00000   0.00000   0.00000   1.91359
    A7        2.05570   0.00000   0.00001   0.00000   0.00001   2.05571
    A8        2.12432   0.00000   0.00000  -0.00001  -0.00001   2.12432
    A9        2.10316   0.00000   0.00000   0.00001   0.00000   2.10317
   A10        1.93046   0.00000   0.00000   0.00000   0.00000   1.93046
   A11        1.89155   0.00000   0.00000   0.00000   0.00000   1.89156
   A12        1.93047   0.00000   0.00000   0.00000   0.00000   1.93046
   A13        1.90853   0.00000   0.00000   0.00000   0.00000   1.90853
   A14        1.89417   0.00000   0.00000   0.00000   0.00000   1.89417
   A15        1.90853   0.00000   0.00000   0.00000   0.00000   1.90852
   A16        1.95421   0.00000   0.00000   0.00000   0.00000   1.95421
   A17        2.19591   0.00000   0.00000   0.00000   0.00000   2.19591
   A18        2.13307   0.00000   0.00000   0.00000   0.00000   2.13306
    D1       -1.05169   0.00000  -0.00001   0.00003   0.00002  -1.05167
    D2        2.09001   0.00000  -0.00012   0.00004  -0.00008   2.08993
    D3        1.05166   0.00000  -0.00001   0.00002   0.00002   1.05167
    D4       -2.08983   0.00000  -0.00012   0.00004  -0.00008  -2.08991
    D5        3.14158   0.00000  -0.00001   0.00003   0.00001  -3.14159
    D6        0.00009   0.00000  -0.00013   0.00004  -0.00008   0.00001
    D7        1.04957   0.00000  -0.00002   0.00001  -0.00001   1.04956
    D8       -3.14158   0.00000  -0.00002   0.00001  -0.00001   3.14159
    D9       -1.04955   0.00000  -0.00002   0.00001  -0.00001  -1.04957
   D10       -2.09212   0.00000   0.00009  -0.00001   0.00008  -2.09204
   D11       -0.00009   0.00000   0.00009  -0.00001   0.00008  -0.00001
   D12        2.09194   0.00000   0.00009  -0.00001   0.00008   2.09202
   D13       -0.00006   0.00000   0.00008  -0.00002   0.00006   0.00000
   D14        3.14154   0.00000   0.00007  -0.00001   0.00005   3.14159
   D15       -3.14155   0.00000  -0.00004   0.00000  -0.00004  -3.14159
   D16        0.00005   0.00000  -0.00005   0.00001  -0.00004   0.00000
         Item               Value     Threshold  Converged?
 Maximum Force            0.000006     0.000015     YES
 RMS     Force            0.000001     0.000010     YES
 Maximum Displacement     0.000055     0.000060     YES
 RMS     Displacement     0.000027     0.000040     YES
 Predicted change in Energy=-1.690872D-10
 Optimization completed.
    -- Stationary point found.
                           ----------------------------
                           !   Optimized Parameters   !
                           ! (Angstroms and Degrees)  !
 --------------------------                            --------------------------
 ! Name  Definition              Value          Derivative Info.                !
 --------------------------------------------------------------------------------
 ! R1    R(1,2)                  1.0945         -DE/DX =    0.0                 !
 ! R2    R(1,3)                  1.0945         -DE/DX =    0.0                 !
 ! R3    R(1,4)                  1.09           -DE/DX =    0.0                 !
 ! R4    R(1,5)                  1.4491         -DE/DX =    0.0                 !
 ! R5    R(5,6)                  1.4524         -DE/DX =    0.0                 !
 ! R6    R(5,10)                 1.3604         -DE/DX =    0.0                 !
 ! R7    R(6,7)                  1.0941         -DE/DX =    0.0                 !
 ! R8    R(6,8)                  1.0872         -DE/DX =    0.0                 !
 ! R9    R(6,9)                  1.0941         -DE/DX =    0.0                 !
 ! R10   R(10,11)                1.1046         -DE/DX =    0.0                 !
 ! R11   R(10,12)                1.2159         -DE/DX =    0.0                 !
 ! A1    A(2,1,3)              108.2857         -DE/DX =    0.0                 !
 ! A2    A(2,1,4)              108.3973         -DE/DX =    0.0                 !
 ! A3    A(2,1,5)              111.0192         -DE/DX =    0.0                 !
 ! A4    A(3,1,4)              108.3972         -DE/DX =    0.0                 !
 ! A5    A(3,1,5)              111.0197         -DE/DX =    0.0                 !
 ! A6    A(4,1,5)              109.6404         -DE/DX =    0.0                 !
 ! A7    A(1,5,6)              117.7828         -DE/DX =    0.0                 !
 ! A8    A(1,5,10)             121.7148         -DE/DX =    0.0                 !
 ! A9    A(6,5,10)             120.5023         -DE/DX =    0.0                 !
 ! A10   A(5,6,7)              110.6074         -DE/DX =    0.0                 !
 ! A11   A(5,6,8)              108.378          -DE/DX =    0.0                 !
 ! A12   A(5,6,9)              110.6076         -DE/DX =    0.0                 !
 ! A13   A(7,6,8)              109.3505         -DE/DX =    0.0                 !
 ! A14   A(7,6,9)              108.528          -DE/DX =    0.0                 !
 ! A15   A(8,6,9)              109.3505         -DE/DX =    0.0                 !
 ! A16   A(5,10,11)            111.9678         -DE/DX =    0.0                 !
 ! A17   A(5,10,12)            125.8166         -DE/DX =    0.0                 !
 ! A18   A(11,10,12)           122.2157         -DE/DX =    0.0                 !
 ! D1    D(2,1,5,6)            -60.2573         -DE/DX =    0.0                 !
 ! D2    D(2,1,5,10)           119.7485         -DE/DX =    0.0                 !
 ! D3    D(3,1,5,6)             60.2556         -DE/DX =    0.0                 !
 ! D4    D(3,1,5,10)          -119.7386         -DE/DX =    0.0                 !
 ! D5    D(4,1,5,6)           -180.0007         -DE/DX =    0.0                 !
 ! D6    D(4,1,5,10)             0.005          -DE/DX =    0.0                 !
 ! D7    D(1,5,6,7)             60.1362         -DE/DX =    0.0                 !
 ! D8    D(1,5,6,8)            180.0006         -DE/DX =    0.0                 !
 ! D9    D(1,5,6,9)            -60.135          -DE/DX =    0.0                 !
 ! D10   D(10,5,6,7)          -119.8695         -DE/DX =    0.0                 !
 ! D11   D(10,5,6,8)            -0.0051         -DE/DX =    0.0                 !
 ! D12   D(10,5,6,9)           119.8593         -DE/DX =    0.0                 !
 ! D13   D(1,5,10,11)           -0.0035         -DE/DX =    0.0                 !
 ! D14   D(1,5,10,12)          179.9968         -DE/DX =    0.0                 !
 ! D15   D(6,5,10,11)         -179.9976         -DE/DX =    0.0                 !
 ! D16   D(6,5,10,12)            0.0027         -DE/DX =    0.0                 !
 --------------------------------------------------------------------------------
 GradGradGradGradGradGradGradGradGradGradGradGradGradGradGradGradGradGrad

                          Input orientation:                          
 ---------------------------------------------------------------------
 Center     Atomic     Atomic              Coordinates (Angstroms)
 Number     Number      Type              X           Y           Z
 ---------------------------------------------------------------------
    1          6             0       -2.976459   -0.733532    0.088605
    2          1             0       -2.870888   -1.791077   -0.172719
    3          1             0       -2.527808   -0.576993    1.074529
    4          1             0       -4.039109   -0.499536    0.153134
    5          7             0       -2.350938    0.112944   -0.907436
    6          6             0       -0.926558   -0.052346   -1.138324
    7          1             0       -0.705972   -1.071186   -1.470434
    8          1             0       -0.620089    0.651730   -1.907977
    9          1             0       -0.362504    0.144324   -0.221723
   10          6             0       -3.061854    1.035817   -1.610082
   11          1             0       -4.128439    1.042088   -1.322775
   12          8             0       -2.614962    1.782238   -2.459501
 ---------------------------------------------------------------------
                    Distance matrix (angstroms):
                    1          2          3          4          5
     1  C    0.000000
     2  H    1.094457   0.000000
     3  H    1.094458   1.774072   0.000000
     4  H    1.090020   1.771722   1.771722   0.000000
     5  N    1.449102   2.106052   2.106058   2.085632   0.000000
     6  C    2.484243   2.781366   2.781362   3.399385   1.452408
     7  H    2.774838   2.624723   3.168620   3.751341   2.103579
     8  H    3.384933   3.747602   3.747598   4.154911   2.070558
     9  H    2.774833   3.168623   2.624712   3.751333   2.103582
    10  C    2.454267   3.177075   3.177026   2.534021   1.360443
    11  H    2.543989   3.306189   3.306132   2.136093   2.048249
    12  O    3.598975   4.250112   4.250051   3.749740   2.294593
                    6          7          8          9         10
     6  C    0.000000
     7  H    1.094071   0.000000
     8  H    1.087204   1.779680   0.000000
     9  H    1.094072   1.776151   1.779680   0.000000
    10  C    2.442569   3.163723   2.489675   3.163667   0.000000
    11  H    3.388783   4.025048   3.578179   4.024993   1.104621
    12  O    2.821686   3.572748   2.358335   3.572671   1.215883
                   11         12
    11  H    0.000000
    12  O    2.032383   0.000000
 Stoichiometry    C3H7NO
 Framework group  C1[X(C3H7NO)]
 Deg. of freedom    30
 Full point group                 C1
 Largest Abelian subgroup         C1      NOp   1
 Largest concise Abelian subgroup C1      NOp   1
                         Standard orientation:                         
 ---------------------------------------------------------------------
 Center     Atomic     Atomic              Coordinates (Angstroms)
 Number     Number      Type              X           Y           Z
 ---------------------------------------------------------------------
    1          6             0        1.587840   -0.762717    0.000012
    2          1             0        2.184934   -0.529184   -0.886992
    3          1             0        2.184855   -0.529214    0.887079
    4          1             0        1.375376   -1.831830   -0.000015
    5          7             0        0.344160   -0.018971   -0.000038
    6          6             0        0.422640    1.431315    0.000004
    7          1             0        0.952675    1.788294   -0.888038
    8          1             0       -0.589084    1.829343   -0.000032
    9          1             0        0.952593    1.788251    0.888114
   10          6             0       -0.863609   -0.645150   -0.000006
   11          1             0       -0.758942   -1.744802   -0.000002
   12          8             0       -1.949094   -0.097343    0.000012
 ---------------------------------------------------------------------
 Rotational constants (GHZ):      8.9135622      4.1863595      2.9542786

 **********************************************************************

            Population analysis using the SCF density.

 **********************************************************************

 Orbital symmetries:
       Occupied  (A) (A) (A) (A) (A) (A) (A) (A) (A) (A) (A) (A)
                 (A) (A) (A) (A) (A) (A) (A) (A)
       Virtual   (A) (A) (A) (A) (A) (A) (A) (A) (A) (A) (A) (A)
                 (A) (A) (A) (A) (A) (A) (A) (A) (A) (A) (A) (A)
                 (A) (A) (A) (A) (A) (A) (A) (A) (A) (A) (A) (A)
                 (A) (A) (A) (A) (A) (A) (A) (A) (A) (A) (A) (A)
                 (A) (A) (A) (A) (A) (A) (A) (A) (A) (A) (A) (A)
                 (A) (A) (A) (A) (A) (A) (A) (A) (A) (A) (A) (A)
                 (A) (A) (A) (A) (A) (A) (A) (A) (A) (A) (A) (A)
                 (A) (A) (A) (A) (A) (A) (A) (A) (A) (A) (A) (A)
                 (A) (A) (A) (A) (A) (A) (A) (A) (A) (A) (A) (A)
                 (A) (A) (A) (A) (A) (A) (A) (A) (A)
 The electronic state is 1-A.
 Alpha  occ. eigenvalues --  -19.09388 -14.35844 -10.26852 -10.22129 -10.20760
 Alpha  occ. eigenvalues --   -1.04164  -0.94970  -0.74251  -0.71208  -0.57838
 Alpha  occ. eigenvalues --   -0.52582  -0.48852  -0.47575  -0.42227  -0.41943
 Alpha  occ. eigenvalues --   -0.41226  -0.39655  -0.38554  -0.26416  -0.25444
 Alpha virt. eigenvalues --    0.01201   0.02514   0.06234   0.07080   0.08714
 Alpha virt. eigenvalues --    0.09480   0.11606   0.12927   0.13412   0.14969
 Alpha virt. eigenvalues --    0.16288   0.16683   0.19828   0.21445   0.25334
 Alpha virt. eigenvalues --    0.28647   0.30698   0.30927   0.32558   0.34754
 Alpha virt. eigenvalues --    0.35852   0.39074   0.41484   0.44687   0.45232
 Alpha virt. eigenvalues --    0.45349   0.45728   0.47156   0.48109   0.51038
 Alpha virt. eigenvalues --    0.53164   0.54850   0.57304   0.57838   0.60224
 Alpha virt. eigenvalues --    0.62352   0.69591   0.77652   0.84906   1.13340
 Alpha virt. eigenvalues --    1.19351   1.21849   1.24449   1.26661   1.27215
 Alpha virt. eigenvalues --    1.28626   1.33037   1.34176   1.34367   1.35492
 Alpha virt. eigenvalues --    1.42833   1.46496   1.49064   1.50684   1.51572
 Alpha virt. eigenvalues --    1.57444   1.58760   1.60375   1.64735   1.65468
 Alpha virt. eigenvalues --    1.70441   1.72597   1.75287   1.77484   1.78194
 Alpha virt. eigenvalues --    1.78382   1.80400   1.84637   1.91559   2.02920
 Alpha virt. eigenvalues --    2.05223   2.09723   2.10842   2.20866   2.25482
 Alpha virt. eigenvalues --    2.26720   2.27542   2.31823   2.35178   2.37319
 Alpha virt. eigenvalues --    2.40772   2.43537   2.46857   2.48559   2.52492
 Alpha virt. eigenvalues --    2.53462   2.56184   2.59038   2.63273   2.67533
 Alpha virt. eigenvalues --    2.69470   2.71426   2.71479   2.74572   2.77657
 Alpha virt. eigenvalues --    2.81643   2.85036   3.03243   3.04471   3.08820
 Alpha virt. eigenvalues --    3.11638   3.22306   3.23773   3.26717   3.27863
 Alpha virt. eigenvalues --    3.28844   3.37195   3.42296   3.48645   3.72213
 Alpha virt. eigenvalues --    3.73502   4.27219  21.84789  22.04981  22.11577
 Alpha virt. eigenvalues --   31.84277  43.48823
          Condensed to atoms (all electrons):
              1          2          3          4          5          6
     1  C    4.893440   0.409960   0.409959   0.387533   0.264402  -0.075974
     2  H    0.409960   0.597045  -0.060082  -0.025574  -0.054762  -0.004168
     3  H    0.409959  -0.060082   0.597053  -0.025576  -0.054767  -0.004166
     4  H    0.387533  -0.025574  -0.025576   0.559063  -0.033798   0.012324
     5  N    0.264402  -0.054762  -0.054767  -0.033798   6.995240   0.234503
     6  C   -0.075974  -0.004168  -0.004166   0.012324   0.234503   4.959738
     7  H   -0.006890   0.009740  -0.003428  -0.000184  -0.047583   0.408016
     8  H    0.010630  -0.000165  -0.000165  -0.000172  -0.043809   0.394944
     9  H   -0.006890  -0.003428   0.009741  -0.000184  -0.047587   0.408025
    10  C   -0.049263   0.001796   0.001795  -0.010117   0.275390  -0.060955
    11  H   -0.015316  -0.000324  -0.000324   0.015505  -0.145008   0.007808
    12  O    0.006618   0.000019   0.000019   0.000301  -0.138374  -0.023599
              7          8          9         10         11         12
     1  C   -0.006890   0.010630  -0.006890  -0.049263  -0.015316   0.006618
     2  H    0.009740  -0.000165  -0.003428   0.001796  -0.000324   0.000019
     3  H   -0.003428  -0.000165   0.009741   0.001795  -0.000324   0.000019
     4  H   -0.000184  -0.000172  -0.000184  -0.010117   0.015505   0.000301
     5  N   -0.047583  -0.043809  -0.047587   0.275390  -0.145008  -0.138374
     6  C    0.408016   0.394944   0.408025  -0.060955   0.007808  -0.023599
     7  H    0.582067  -0.021498  -0.049548   0.004658  -0.000088   0.000847
     8  H   -0.021498   0.488509  -0.021500  -0.012254   0.003492   0.034422
     9  H   -0.049548  -0.021500   0.582067   0.004655  -0.000088   0.000847
    10  C    0.004658  -0.012254   0.004655   4.610349   0.405887   0.597342
    11  H   -0.000088   0.003492  -0.000088   0.405887   0.741932  -0.055303
    12  O    0.000847   0.034422   0.000847   0.597342  -0.055303   7.956961
 Mulliken atomic charges:
              1
     1  C   -0.228210
     2  H    0.129942
     3  H    0.129940
     4  H    0.120879
     5  N   -0.203847
     6  C   -0.256495
     7  H    0.123890
     8  H    0.167567
     9  H    0.123890
    10  C    0.230717
    11  H    0.041827
    12  O   -0.380100
 Sum of Mulliken charges=   0.00000
 Atomic charges with hydrogens summed into heavy atoms:
              1
     1  C    0.152551
     2  H    0.000000
     3  H    0.000000
     4  H    0.000000
     5  N   -0.203847
     6  C    0.158852
     7  H    0.000000
     8  H    0.000000
     9  H    0.000000
    10  C    0.272545
    11  H    0.000000
    12  O   -0.380100
 Sum of Mulliken charges=   0.00000
 APT atomic charges:
              1
     1  C    0.357786
     2  H   -0.042508
     3  H   -0.042516
     4  H    0.008783
     5  N   -0.734138
     6  C    0.276664
     7  H   -0.031863
     8  H    0.058668
     9  H   -0.031868
    10  C    1.044875
    11  H   -0.042793
    12  O   -0.821090
 Sum of APT charges=   0.00000
 APT Atomic charges with hydrogens summed into heavy atoms:
              1
     1  C    0.281545
     2  H    0.000000
     3  H    0.000000
     4  H    0.000000
     5  N   -0.734138
     6  C    0.271601
     7  H    0.000000
     8  H    0.000000
     9  H    0.000000
    10  C    1.002082
    11  H    0.000000
    12  O   -0.821090
 Sum of APT charges=   0.00000
 Electronic spatial extent (au):  <R**2>=   444.5700
 Charge=     0.0000 electrons
 Dipole moment (field-independent basis, Debye):
    X=     4.1255    Y=    -0.4072    Z=     0.0000  Tot=     4.1456
 Quadrupole moment (field-independent basis, Debye-Ang):
   XX=   -37.7736   YY=   -27.8985   ZZ=   -31.3944
   XY=    -0.0480   XZ=     0.0001   YZ=     0.0000
 Traceless Quadrupole moment (field-independent basis, Debye-Ang):
   XX=    -5.4181   YY=     4.4570   ZZ=     0.9611
   XY=    -0.0480   XZ=     0.0001   YZ=     0.0000
 Octapole moment (field-independent basis, Debye-Ang**2):
  XXX=    16.6674  YYY=    -1.3198  ZZZ=     0.0002  XYY=    -1.6688
  XXY=    -0.4986  XXZ=    -0.0004  XZZ=    -0.4126  YZZ=     0.6323
  YYZ=    -0.0001  XYZ=    -0.0001
 Hexadecapole moment (field-independent basis, Debye-Ang**3):
 XXXX=  -374.5601 YYYY=  -192.8883 ZZZZ=   -45.6006 XXXY=    -4.3743
 XXXZ=    -0.0004 YYYX=    -0.2662 YYYZ=    -0.0001 ZZZX=     0.0001
 ZZZY=     0.0000 XXYY=   -87.9110 XXZZ=   -61.4981 YYZZ=   -41.4662
 XXYZ=    -0.0002 YYXZ=    -0.0001 ZZXY=     1.4597
 N-N= 1.815264472672D+02 E-N=-9.432017254439D+02  KE= 2.474062833952D+02
  Exact polarizability:  59.479   1.033  49.174   0.000   0.000  35.979
 Approx polarizability:  86.862   0.108  62.975   0.000   0.000  49.682
 Rotating derivatives to standard orientation.
 Full mass-weighted force constant matrix:
 Low frequencies ---  -13.4291   -0.0009    0.0005    0.0007    9.3165   17.8176
 Low frequencies ---  117.8264  168.3573  235.9665
 Diagonal vibrational polarizability:
        9.3035595       4.7596864       5.6845127
 Harmonic frequencies (cm**-1), IR intensities (KM/Mole), Raman scattering
 activities (A**4/AMU), depolarization ratios for plane and unpolarized
 incident light, reduced masses (AMU), force constants (mDyne/A),
 and normal coordinates:
                     1                      2                      3
                     A                      A                      A
 Frequencies --   117.7975               168.3471               235.9505
 Red. masses --     1.4655                 1.1201                 1.5913
 Frc consts  --     0.0120                 0.0187                 0.0522
 IR Inten    --     0.1008                 0.0476                 1.1155
 Atom AN      X      Y      Z        X      Y      Z        X      Y      Z
   1   6     0.00   0.00  -0.05     0.00   0.00   0.06     0.00   0.00   0.08
   2   1    -0.21  -0.15  -0.23     0.22   0.26   0.28    -0.03  -0.43  -0.06
   3   1     0.21   0.15  -0.23    -0.22  -0.26   0.28     0.03   0.43  -0.06
   4   1     0.00   0.00   0.18     0.00   0.00  -0.31     0.00   0.00   0.61
   5   7     0.00   0.00   0.14     0.00   0.00  -0.06     0.00   0.00  -0.17
   6   6     0.00   0.00   0.01     0.00   0.00  -0.02     0.00   0.00   0.05
   7   1    -0.42  -0.03  -0.25    -0.35   0.06  -0.21    -0.15   0.17   0.03
   8   1     0.00   0.00   0.46     0.00   0.00   0.39     0.00   0.00   0.29
   9   1     0.42   0.03  -0.25     0.35  -0.06  -0.21     0.15  -0.17   0.03
  10   6     0.00   0.00   0.02     0.00   0.00  -0.02     0.00   0.00  -0.07
  11   1     0.00   0.00   0.08     0.00   0.00  -0.03     0.00   0.00  -0.13
  12   8     0.00   0.00  -0.10     0.00   0.00   0.03     0.00   0.00   0.06
                     4                      5                      6
                     A                      A                      A
 Frequencies --   318.9911               337.9115               396.0886
 Red. masses --     3.8560                 2.3511                 2.3821
 Frc consts  --     0.2312                 0.1582                 0.2202
 IR Inten    --    11.8132                18.6339                 1.7273
 Atom AN      X      Y      Z        X      Y      Z        X      Y      Z
   1   6    -0.12   0.01   0.00     0.00   0.00   0.05     0.09   0.19   0.00
   2   1    -0.10  -0.06   0.00    -0.05   0.00   0.01     0.02   0.42   0.01
   3   1    -0.10  -0.06   0.00     0.05   0.00   0.01     0.02   0.42  -0.01
   4   1    -0.23   0.03   0.00     0.00   0.00   0.08     0.46   0.12   0.00
   5   7    -0.04   0.14   0.00     0.00   0.00   0.16    -0.07  -0.10   0.00
   6   6     0.29   0.12   0.00     0.00   0.00  -0.08     0.12  -0.14   0.00
   7   1     0.40  -0.02   0.00    -0.01  -0.19  -0.16     0.21  -0.25   0.01
   8   1     0.40   0.42   0.00     0.00   0.00  -0.14     0.21   0.09   0.00
   9   1     0.40  -0.02   0.00     0.01   0.19  -0.16     0.21  -0.25  -0.01
  10   6    -0.01   0.03   0.00     0.00   0.00  -0.24    -0.11  -0.05   0.00
  11   1     0.21   0.05   0.00     0.00   0.00  -0.86    -0.18  -0.05   0.00
  12   8    -0.14  -0.26   0.00     0.00   0.00   0.14    -0.07   0.05   0.00
                     7                      8                      9
                     A                      A                      A
 Frequencies --   660.0166               870.5262              1017.6888
 Red. masses --     5.1025                 3.8828                 1.6059
 Frc consts  --     1.3096                 1.7336                 0.9799
 IR Inten    --     7.6802                 1.7769                 0.0000
 Atom AN      X      Y      Z        X      Y      Z        X      Y      Z
   1   6     0.35  -0.16   0.00     0.12  -0.10   0.00     0.00   0.00   0.01
   2   1     0.33  -0.14   0.00     0.11  -0.07   0.00    -0.02   0.02  -0.01
   3   1     0.33  -0.14   0.00     0.11  -0.07   0.00     0.02  -0.02  -0.01
   4   1     0.34  -0.16   0.00     0.25  -0.13   0.00     0.00   0.00  -0.02
   5   7     0.15  -0.01   0.00    -0.10  -0.07   0.00     0.00   0.00   0.05
   6   6    -0.01   0.05   0.00     0.00   0.34   0.00     0.00   0.00  -0.01
   7   1    -0.15   0.23  -0.01     0.11   0.18   0.01     0.02   0.09   0.03
   8   1    -0.13  -0.22   0.00     0.10   0.60   0.00     0.00   0.00   0.04
   9   1    -0.15   0.23   0.01     0.11   0.18  -0.01    -0.02  -0.09   0.03
  10   6    -0.13   0.19   0.00    -0.12  -0.28   0.00     0.00   0.00  -0.22
  11   1    -0.13   0.20   0.00    -0.29  -0.30   0.00     0.00   0.00   0.96
  12   8    -0.32  -0.05   0.00     0.06   0.06   0.00     0.00   0.00   0.06
                    10                     11                     12
                     A                      A                      A
 Frequencies --  1081.6338              1095.2163              1130.1685
 Red. masses --     1.3947                 1.7726                 1.2225
 Frc consts  --     0.9614                 1.2527                 0.9200
 IR Inten    --     6.2996               118.1459                 0.1025
 Atom AN      X      Y      Z        X      Y      Z        X      Y      Z
   1   6     0.11   0.04   0.00     0.00   0.14   0.00     0.00   0.00   0.10
   2   1     0.17  -0.31  -0.05     0.11  -0.30  -0.05    -0.43   0.17  -0.14
   3   1     0.17  -0.31   0.05     0.11  -0.30   0.05     0.43  -0.17  -0.14
   4   1    -0.41   0.14   0.00    -0.55   0.24   0.00     0.00   0.00  -0.21
   5   7    -0.03   0.06   0.00     0.10   0.01   0.00     0.00   0.00   0.00
   6   6    -0.11  -0.06   0.00     0.10  -0.02   0.00     0.00   0.00  -0.10
   7   1     0.18  -0.33   0.06    -0.13   0.23  -0.04     0.08   0.43   0.13
   8   1     0.11   0.48   0.00    -0.06  -0.40   0.00     0.00   0.00   0.20
   9   1     0.18  -0.33  -0.06    -0.13   0.23   0.04    -0.08  -0.43   0.13
  10   6     0.00   0.00   0.00    -0.10  -0.13   0.00     0.00   0.00   0.01
  11   1     0.02   0.01   0.00    -0.22  -0.14   0.00     0.00   0.00  -0.12
  12   8     0.00   0.00   0.00    -0.03   0.02   0.00     0.00   0.00   0.00
                    13                     14                     15
                     A                      A                      A
 Frequencies --  1177.6619              1272.8567              1412.6922
 Red. masses --     1.3689                 4.4443                 1.9700
 Frc consts  --     1.1186                 4.2424                 2.3164
 IR Inten    --     2.6433                34.7338                93.3055
 Atom AN      X      Y      Z        X      Y      Z        X      Y      Z
   1   6     0.00   0.00   0.10     0.14  -0.13   0.00    -0.07  -0.07   0.00
   2   1    -0.41   0.14  -0.14     0.11  -0.01   0.02     0.08   0.27   0.17
   3   1     0.41  -0.14  -0.14     0.11  -0.01  -0.02     0.08   0.27  -0.17
   4   1     0.00   0.00  -0.22     0.27  -0.15   0.00     0.14  -0.10   0.00
   5   7     0.00   0.00  -0.10    -0.25   0.34   0.00     0.15   0.16   0.00
   6   6     0.00   0.00   0.10     0.11  -0.18   0.00    -0.07  -0.08   0.00
   7   1    -0.10  -0.44  -0.14    -0.24   0.20  -0.07     0.18   0.04   0.17
   8   1     0.00   0.00  -0.22     0.00  -0.42   0.00     0.05   0.20   0.00
   9   1     0.10   0.44  -0.14    -0.24   0.20   0.07     0.18   0.04  -0.17
  10   6     0.00   0.00  -0.02    -0.08  -0.12   0.00    -0.05  -0.07   0.00
  11   1     0.00   0.00   0.09     0.47  -0.06   0.00    -0.70  -0.11   0.00
  12   8     0.00   0.00   0.01     0.06   0.04   0.00     0.00  -0.02   0.00
                    16                     17                     18
                     A                      A                      A
 Frequencies --  1434.8003              1443.3162              1474.3008
 Red. masses --     1.4401                 1.1840                 1.1916
 Frc consts  --     1.7467                 1.4531                 1.5260
 IR Inten    --     9.7275                 6.5184                 8.3856
 Atom AN      X      Y      Z        X      Y      Z        X      Y      Z
   1   6     0.08  -0.02   0.00     0.01   0.00   0.00    -0.08   0.07   0.00
   2   1    -0.16   0.12  -0.11     0.06  -0.05   0.02     0.24  -0.40   0.08
   3   1    -0.16   0.12   0.11     0.06  -0.05  -0.02     0.24  -0.40  -0.08
   4   1    -0.34   0.07   0.00     0.05  -0.01   0.00     0.58  -0.07   0.00
   5   7    -0.09  -0.03   0.00    -0.05   0.04   0.00    -0.02   0.00   0.00
   6   6     0.04  -0.04   0.00     0.01   0.09   0.00     0.02  -0.03   0.00
   7   1    -0.24   0.19  -0.08     0.12  -0.42  -0.13    -0.18   0.05  -0.08
   8   1     0.14   0.21   0.00    -0.24  -0.55   0.00     0.11   0.20   0.00
   9   1    -0.24   0.19   0.08     0.12  -0.42   0.13    -0.18   0.05   0.08
  10   6     0.03   0.09   0.00     0.03   0.02   0.00     0.00   0.05   0.00
  11   1    -0.69   0.03   0.00    -0.44  -0.01   0.00    -0.24   0.03   0.00
  12   8     0.06  -0.06   0.00     0.02  -0.02   0.00     0.03  -0.03   0.00
                    19                     20                     21
                     A                      A                      A
 Frequencies --  1482.9727              1504.9472              1507.8972
 Red. masses --     1.0401                 1.0422                 1.0661
 Frc consts  --     1.3477                 1.3907                 1.4283
 IR Inten    --     4.0275                17.3861                12.8879
 Atom AN      X      Y      Z        X      Y      Z        X      Y      Z
   1   6     0.00   0.00  -0.05     0.00   0.00  -0.01     0.03   0.03   0.00
   2   1    -0.08   0.47   0.05    -0.02   0.13   0.01    -0.26  -0.22  -0.24
   3   1     0.08  -0.47   0.05     0.02  -0.13   0.01    -0.26  -0.22   0.24
   4   1     0.00   0.00   0.68     0.00   0.00   0.19     0.23  -0.02   0.00
   5   7     0.00   0.00  -0.01     0.00   0.00  -0.02    -0.03   0.00   0.00
   6   6     0.00   0.00   0.02     0.00   0.00  -0.05    -0.03  -0.02   0.00
   7   1    -0.10   0.08  -0.02     0.34  -0.32   0.05     0.35   0.23   0.31
   8   1     0.00   0.00  -0.20     0.00   0.00   0.70    -0.10  -0.20   0.00
   9   1     0.10  -0.08  -0.02    -0.34   0.32   0.05     0.35   0.23  -0.31
  10   6     0.00   0.00   0.00     0.00   0.00   0.00     0.00   0.02   0.00
  11   1     0.00   0.00   0.00     0.00   0.00   0.02    -0.12   0.01   0.00
  12   8     0.00   0.00   0.00     0.00   0.00   0.00     0.02  -0.01   0.00
                    22                     23                     24
                     A                      A                      A
 Frequencies --  1542.4242              1758.1991              2944.7208
 Red. masses --     1.1916                 8.1030                 1.0837
 Frc consts  --     1.6703                14.7581                 5.5369
 IR Inten    --    20.6554               473.8784                91.0720
 Atom AN      X      Y      Z        X      Y      Z        X      Y      Z
   1   6    -0.02  -0.01   0.00    -0.01   0.00   0.00     0.00   0.00   0.00
   2   1     0.44   0.10   0.32     0.08  -0.07   0.06    -0.01  -0.01   0.03
   3   1     0.44   0.10  -0.32     0.08  -0.07  -0.06    -0.01  -0.01  -0.03
   4   1    -0.24   0.05   0.00     0.03   0.01   0.00     0.01   0.04   0.00
   5   7    -0.09  -0.06   0.00    -0.11   0.02   0.00     0.00   0.00   0.00
   6   6    -0.01   0.00   0.00     0.03  -0.04   0.00     0.00   0.00   0.00
   7   1     0.22   0.23   0.22    -0.03   0.19   0.07    -0.01  -0.01   0.02
   8   1    -0.07  -0.17   0.00     0.07   0.05   0.00     0.01  -0.01   0.00
   9   1     0.22   0.23  -0.22    -0.03   0.19  -0.07    -0.01  -0.01  -0.02
  10   6     0.01   0.05   0.00     0.61  -0.22   0.00    -0.01   0.08   0.00
  11   1     0.01   0.05   0.00    -0.45  -0.28   0.00     0.07  -0.99   0.00
  12   8     0.03  -0.02   0.00    -0.35   0.17   0.00     0.00   0.00   0.00
                    25                     26                     27
                     A                      A                      A
 Frequencies --  3010.7095              3019.0779              3055.0274
 Red. masses --     1.0361                 1.0378                 1.1046
 Frc consts  --     5.5332                 5.5733                 6.0742
 IR Inten    --    45.5223                60.7088                50.6801
 Atom AN      X      Y      Z        X      Y      Z        X      Y      Z
   1   6     0.05   0.00   0.00     0.02   0.00   0.00     0.00   0.00  -0.09
   2   1    -0.32  -0.13   0.50    -0.14  -0.05   0.21    -0.37  -0.16   0.55
   3   1    -0.32  -0.13  -0.50    -0.14  -0.05  -0.21     0.37   0.16   0.55
   4   1     0.07   0.31   0.00     0.03   0.14   0.00     0.00   0.00  -0.02
   5   7     0.00   0.00   0.00     0.00   0.00   0.00     0.00   0.00   0.00
   6   6    -0.01  -0.02   0.00     0.03   0.04   0.00     0.00   0.00  -0.02
   7   1     0.13   0.08  -0.22    -0.29  -0.19   0.51    -0.08  -0.05   0.13
   8   1    -0.11   0.04   0.00     0.26  -0.10   0.00     0.00   0.00   0.00
   9   1     0.13   0.08   0.22    -0.29  -0.19  -0.51     0.08   0.05   0.13
  10   6     0.00   0.00   0.00     0.00  -0.01   0.00     0.00   0.00   0.00
  11   1     0.00   0.04   0.00     0.00   0.06   0.00     0.00   0.00   0.00
  12   8     0.00   0.00   0.00     0.00   0.00   0.00     0.00   0.00   0.00
                    28                     29                     30
                     A                      A                      A
 Frequencies --  3063.6717              3114.6252              3150.3017
 Red. masses --     1.1047                 1.0986                 1.0973
 Frc consts  --     6.1091                 6.2790                 6.4163
 IR Inten    --    20.0470                17.1350                 1.1740
 Atom AN      X      Y      Z        X      Y      Z        X      Y      Z
   1   6     0.00   0.00  -0.02    -0.03  -0.08   0.00     0.00   0.00   0.00
   2   1    -0.08  -0.04   0.13     0.12   0.04  -0.20     0.00   0.00   0.01
   3   1     0.08   0.04   0.13     0.12   0.04   0.20     0.00   0.00  -0.01
   4   1     0.00   0.00  -0.01     0.19   0.92   0.00    -0.01  -0.04   0.00
   5   7     0.00   0.00   0.00     0.00   0.00   0.00     0.00   0.00   0.00
   6   6     0.00   0.00   0.09     0.00   0.00   0.00    -0.09   0.02   0.00
   7   1     0.34   0.22  -0.55     0.00   0.00  -0.01     0.08   0.06  -0.17
   8   1     0.00   0.00   0.02     0.03  -0.01   0.00     0.89  -0.36   0.00
   9   1    -0.34  -0.22  -0.55     0.00   0.00   0.01     0.08   0.06   0.17
  10   6     0.00   0.00   0.00     0.00   0.00   0.00     0.00   0.00   0.00
  11   1     0.00   0.00   0.00     0.00   0.03   0.00     0.00   0.00   0.00
  12   8     0.00   0.00   0.00     0.00   0.00   0.00     0.00   0.00   0.00

 -------------------
 - Thermochemistry -
 -------------------
 Temperature   298.150 Kelvin.  Pressure   1.00000 Atm.
 Atom  1 has atomic number  6 and mass  12.00000
 Atom  2 has atomic number  1 and mass   1.00783
 Atom  3 has atomic number  1 and mass   1.00783
 Atom  4 has atomic number  1 and mass   1.00783
 Atom  5 has atomic number  7 and mass  14.00307
 Atom  6 has atomic number  6 and mass  12.00000
 Atom  7 has atomic number  1 and mass   1.00783
 Atom  8 has atomic number  1 and mass   1.00783
 Atom  9 has atomic number  1 and mass   1.00783
 Atom 10 has atomic number  6 and mass  12.00000
 Atom 11 has atomic number  1 and mass   1.00783
 Atom 12 has atomic number  8 and mass  15.99491
 Molecular mass:    73.05276 amu.
 Principal axes and moments of inertia in atomic units:
                           1         2         3
     EIGENVALUES --   202.47138 431.10039 610.89066
           X            0.99985  -0.01723   0.00000
           Y            0.01723   0.99985   0.00000
           Z            0.00000   0.00000   1.00000
 This molecule is an asymmetric top.
 Rotational symmetry number  1.
 Rotational temperatures (Kelvin)      0.42778     0.20091     0.14178
 Rotational constants (GHZ):           8.91356     4.18636     2.95428
 Zero-point vibrational energy     267966.7 (Joules/Mol)
                                   64.04559 (Kcal/Mol)
 Warning -- explicit consideration of   6 degrees of freedom as
           vibrations may cause significant error
 Vibrational temperatures:    169.48   242.21   339.48   458.96   486.18
          (Kelvin)            569.88   949.62  1252.49  1464.23  1556.23
                             1575.77  1626.06  1694.39  1831.35  2032.55
                             2064.36  2076.61  2121.19  2133.66  2165.28
                             2169.53  2219.20  2529.65  4236.79  4331.73
                             4343.77  4395.50  4407.93  4481.25  4532.58
 
 Zero-point correction=                           0.102063 (Hartree/Particle)
 Thermal correction to Energy=                    0.108176
 Thermal correction to Enthalpy=                  0.109120
 Thermal correction to Gibbs Free Energy=         0.072927
 Sum of electronic and zero-point Energies=           -248.503259
 Sum of electronic and thermal Energies=              -248.497147
 Sum of electronic and thermal Enthalpies=            -248.496202
 Sum of electronic and thermal Free Energies=         -248.532395
 
                     E (Thermal)             CV                S
                      KCal/Mol        Cal/Mol-Kelvin    Cal/Mol-Kelvin
 Total                   67.881             19.993             76.174
 Electronic               0.000              0.000              0.000
 Translational            0.889              2.981             38.782
 Rotational               0.889              2.981             25.481
 Vibrational             66.104             14.032             11.911
 Vibration  1             0.608              1.935              3.136
 Vibration  2             0.625              1.881              2.454
 Vibration  3             0.655              1.786              1.833
 Vibration  4             0.705              1.637              1.315
 Vibration  5             0.718              1.600              1.222
 Vibration  6             0.763              1.479              0.977
                       Q            Log10(Q)             Ln(Q)
 Total Bot       0.285609D-33        -33.544228        -77.238440
 Total V=0       0.252033D+14         13.401458         30.857998
 Vib (Bot)       0.140787D-45        -45.851438       -105.576837
 Vib (Bot)  1    0.173570D+01          0.239474          0.551410
 Vib (Bot)  2    0.119773D+01          0.078358          0.180427
 Vib (Bot)  3    0.832548D+00         -0.079591         -0.183265
 Vib (Bot)  4    0.589658D+00         -0.229400         -0.528212
 Vib (Bot)  5    0.550232D+00         -0.259454         -0.597416
 Vib (Bot)  6    0.451276D+00         -0.345558         -0.795677
 Vib (V=0)       0.124236D+02          1.094249          2.519601
 Vib (V=0)  1    0.230628D+01          0.362912          0.835636
 Vib (V=0)  2    0.179790D+01          0.254766          0.586621
 Vib (V=0)  3    0.147115D+01          0.167657          0.386046
 Vib (V=0)  4    0.127311D+01          0.104865          0.241462
 Vib (V=0)  5    0.124347D+01          0.094637          0.217910
 Vib (V=0)  6    0.117354D+01          0.069496          0.160021
 Electronic      0.100000D+01          0.000000          0.000000
 Translational   0.245420D+08          7.389910         17.015897
 Rotational      0.826607D+05          4.917299         11.322500
 ***** Axes restored to original set *****
 -------------------------------------------------------------------
 Center     Atomic                   Forces (Hartrees/Bohr)
 Number     Number              X              Y              Z
 -------------------------------------------------------------------
    1          6          -0.000004329   -0.000001037    0.000001533
    2          1          -0.000001999    0.000000631    0.000000033
    3          1          -0.000001863    0.000000702   -0.000000438
    4          1          -0.000001372    0.000001306   -0.000001069
    5          7           0.000003788   -0.000001050    0.000002503
    6          6           0.000003171   -0.000001461   -0.000000525
    7          1          -0.000000385   -0.000001367    0.000001457
    8          1           0.000002124   -0.000001715    0.000001182
    9          1          -0.000000369   -0.000001304    0.000001436
   10          6          -0.000001286    0.000004206   -0.000003860
   11          1           0.000000882    0.000001697   -0.000002232
   12          8           0.000001638   -0.000000607   -0.000000021
 -------------------------------------------------------------------
 Cartesian Forces:  Max     0.000004329 RMS     0.000001918
 1\1\RECHENZENTRUM RWTH AACHEN-SRVMBFD\Freq\RB3LYP\TZVP\C3H7N1O1\JENS\0
 3-Sep-2013\0\\# opt=(tight,calcall) freq b3lyp geom=connectivity tzvp\
 \Title Card Required\\0,1\C,-2.9764592394,-0.7335323438,0.0886048067\H
 ,-2.8708883825,-1.7910767713,-0.1727187554\H,-2.5278082948,-0.57699279
 1,1.0745288526\H,-4.0391093075,-0.4995360463,0.1531336553\N,-2.3509381
 247,0.1129440404,-0.9074363973\C,-0.9265579464,-0.0523459771,-1.138324
 1304\H,-0.7059722069,-1.0711863964,-1.4704341405\H,-0.6200890713,0.651
 7303676,-1.9079765782\H,-0.3625038473,0.1443238532,-0.2217234842\C,-3.
 0618541771,1.0358168934,-1.6100815816\H,-4.1284394392,1.0420878399,-1.
 3227753\O,-2.6149619128,1.7822379013,-2.459501027\\Version=AM64L-G03Re
 vE.01\State=1-A\HF=-248.6053224\RMSD=9.028e-09\RMSF=1.918e-06\ZeroPoin
 t=0.1020631\Thermal=0.1081759\Dipole=-0.023981,-1.1653255,1.1408573\Di
 poleDeriv=0.1390143,0.1598949,-0.1060525,0.1029459,0.4420241,-0.147833
 6,-0.0506285,-0.1634817,0.4923183,0.0691897,0.0307702,0.0287741,-0.010
 4045,-0.1885192,0.0330794,0.0195294,-0.0510975,-0.0081943,0.0269722,-0
 .0297635,-0.1052614,-0.0432834,0.0095564,-0.0176921,-0.0427727,0.05145
 37,-0.1640757,-0.1032611,0.0016033,0.0507943,0.0676418,0.0620822,0.005
 73,-0.0134822,0.0238961,0.067528,-0.6960836,0.3917028,-0.2781259,0.174
 6677,-0.8281759,0.4454275,-0.0668584,0.3856568,-0.6781536,0.5135852,-0
 .1371664,0.0797954,-0.0543895,0.1726344,0.1567052,-0.0007798,0.1794911
 ,0.143771,-0.0187261,0.0183055,-0.0235473,0.0897092,-0.1405733,-0.0727
 337,0.0126272,-0.0667084,0.0637107,0.0687014,-0.0016995,0.0081455,-0.0
 649045,0.0626866,0.0466917,0.0696649,0.0293034,0.0446171,-0.0549137,0.
 0354741,-0.0576776,0.0014739,0.0610197,-0.0488129,-0.1302779,-0.044543
 4,-0.101711,0.8074968,-0.2401148,0.0585512,-0.3000667,1.2399664,-0.958
 1064,0.1168996,-0.9745758,1.0871617,-0.2249751,-0.0084998,0.092309,-0.
 0278084,0.0642909,0.0234389,0.1111029,0.0181294,0.0323061,-0.5269999,-
 0.2205068,0.2522951,0.0644185,-0.9569923,0.5341061,-0.0250245,0.612476
 2,-0.9792783\Polar=48.9138575,-3.0956472,48.5283963,-0.545016,-11.3629
 906,47.1889706\PG=C01 [X(C3H7N1O1)]\NImag=0\\0.58328366,-0.03889674,0.
 53963104,0.02999518,0.02536150,0.52174803,-0.05414422,0.02884662,0.006
 85457,0.05107826,0.02753420,-0.27661118,-0.06641903,-0.02637949,0.3083
 7073,0.00834059,-0.06994336,-0.06871656,-0.01082606,0.06415388,0.07409
 230,-0.09825154,-0.01767868,-0.09772399,0.00206466,0.00116604,0.003908
 28,0.09840720,-0.02005158,-0.05729492,-0.04205737,-0.01414054,-0.00478
 080,-0.02789060,0.02240862,0.06097010,-0.09562305,-0.03954768,-0.24392
 280,-0.00493837,-0.00355116,-0.00731973,0.10272090,0.03445047,0.274160
 84,-0.29815335,0.05596586,0.01427899,-0.00126430,0.00117689,-0.0005308
 2,-0.01129573,0.00340017,0.00032805,0.32670223,0.06331510,-0.06390858,
 -0.00211703,0.02994922,-0.00470556,-0.00040892,-0.00617590,0.00094514,
 0.00035324,-0.06157913,0.06550768,0.00712506,-0.00009553,-0.05005873,0
 .00861673,-0.00204110,-0.00068523,-0.02750535,0.00726579,0.00369530,-0
 .01748178,-0.00279668,0.05276457,-0.12872448,-0.02490228,0.04333878,0.
 00194109,0.00071076,-0.00226276,0.00778154,0.00956737,-0.00558456,-0.0
 1700379,-0.02275960,0.02634759,0.60815784,-0.01752192,-0.12434795,0.06
 813702,-0.01813356,-0.02240691,0.03254994,-0.00002688,-0.00012881,0.01
 148086,-0.00009571,0.00403088,-0.00561230,-0.09693054,0.43034897,0.036
 15324,0.07016383,-0.13754860,0.00150710,0.00981097,0.00249175,0.018327
 42,0.02639646,-0.02562738,0.00428566,0.00062175,-0.00354595,-0.0426111
 1,-0.28486755,0.39927770,-0.01711676,-0.00149694,0.00574459,0.00191871
 ,0.00168927,-0.00185392,0.00250063,0.00150838,-0.00218117,0.00086620,0
 .00012052,-0.00026199,-0.20275212,0.01316721,0.02470803,0.47286653,-0.
 02181450,0.00307619,0.00151904,-0.00168910,0.00064543,0.00062990,0.000
 45988,0.00032464,-0.00019878,-0.00275724,-0.00233260,0.00336049,0.0208
 8951,-0.09070942,0.01798262,0.00809930,0.58655552,0.02552261,-0.004069
 32,-0.00458693,-0.00104791,-0.00051588,0.00100836,0.00132227,-0.000270
 69,0.00074752,0.00253941,0.00256887,-0.00285849,0.01718551,0.02010816,
 -0.09063000,0.01512567,-0.03144692,0.58298343,0.00167300,0.00254103,-0
 .00125602,0.00023098,-0.00116330,0.00000610,-0.00019878,-0.00043720,0.
 00020891,0.00015450,-0.00018142,-0.00032616,-0.02173925,0.03805286,0.0
 0930179,-0.05297807,0.03443344,0.01182597,0.06807913,-0.00054735,0.001
 32024,0.00084431,0.00092548,0.00017475,-0.00091929,-0.00011020,-0.0002
 3911,-0.00032055,0.00014761,0.00028046,0.00002665,0.00814633,0.0007722
 6,0.00275267,0.03861593,-0.27269141,-0.07166888,-0.04885202,0.29277924
 ,-0.00029418,-0.00145541,0.00029468,0.00009075,0.00037202,0.00007217,-
 0.00013993,-0.00017555,-0.00021270,-0.00010348,0.00025564,0.00007340,0
 .00574649,-0.00285922,0.00095180,0.01259661,-0.07177551,-0.07305840,-0
 .01543056,0.08047811,0.07192347,-0.00573008,0.00278531,-0.00116641,0.0
 0013553,0.00004705,-0.00027176,0.00016113,0.00021346,0.00005252,-0.001
 02782,-0.00098904,0.00138016,-0.01594924,-0.02425356,0.02759569,-0.068
 46118,-0.04295588,0.04683917,0.00185692,0.00278322,-0.00495552,0.08150
 455,0.00063919,-0.00016972,-0.00012157,0.00016066,0.00023148,0.0000145
 7,-0.00000751,-0.00009549,0.00022132,0.00053640,0.00023396,0.00010129,
 -0.00052228,0.00347071,-0.00465164,-0.05256057,-0.16595179,0.12714164,
 -0.00769082,-0.01698894,0.02091329,0.05379054,0.17412038,0.00092262,-0
 .00071184,0.00032521,0.00001677,0.00022781,-0.00002454,-0.00013151,-0.
 00002148,0.00027684,-0.00010472,0.00052088,0.00001140,0.00449500,0.001
 87574,-0.00451754,0.05618841,0.12449947,-0.18683462,-0.00473834,-0.007
 74334,0.00989336,-0.06154983,-0.13747151,0.19884000,0.00140430,0.00109
 311,-0.00280589,-0.00012164,-0.00031097,0.00031799,0.00020984,-0.00028
 339,0.00119544,0.00029404,0.00026170,0.00026019,-0.03359265,0.00124280
 ,-0.02786118,-0.10420904,-0.02348744,-0.10127666,0.00401132,-0.0003104
 5,0.00395821,0.00571906,0.00369246,0.00730117,0.12737674,-0.00042245,0
 .00000434,-0.00072693,0.00006035,-0.00015486,-0.00030685,-0.00003764,0
 .00014568,0.00006048,0.00010591,-0.00004614,0.00015513,0.00348057,0.00
 242630,0.00675915,-0.02430568,-0.05871566,-0.04153602,-0.01480657,-0.0
 0558970,-0.02695652,0.01157326,0.00603338,0.01712985,0.02269301,0.0565
 0914,0.00071410,0.00030653,0.00187962,-0.00001298,-0.00025978,-0.00037
 410,-0.00116188,-0.00058876,0.00012247,-0.00013115,-0.00002621,0.00026
 050,0.00262560,0.00476053,0.01115004,-0.10532097,-0.04050431,-0.235801
 08,-0.00376748,-0.00159494,-0.00852131,-0.01034846,-0.00647832,-0.0169
 9138,0.11669960,0.04524939,0.24889350,0.01748264,-0.00981304,0.0015920
 5,-0.00279337,-0.00483536,0.00420742,-0.00211018,-0.00242426,0.0040167
 6,-0.00145831,-0.00297904,0.00350633,-0.20427669,0.09289293,-0.0456636
 0,-0.03126947,0.02692551,-0.01788036,-0.00217850,-0.00160414,-0.000313
 14,-0.00115638,0.00121341,-0.00042861,-0.00257995,0.00104412,0.0018100
 7,0.69292183,-0.00394972,-0.02648010,0.01571512,0.00120159,0.00039366,
 0.00160180,0.00176848,0.00238011,-0.00579565,0.00454680,0.00007142,-0.
 00059239,0.07483742,-0.16085975,0.09548643,0.02139022,0.00005101,-0.00
 691512,-0.00317349,0.00055284,0.00187005,-0.00444906,0.00112936,0.0016
 6118,-0.00739539,0.00002370,-0.00078755,0.03010133,0.53219421,-0.00411
 542,0.01733123,-0.02718269,-0.00183580,-0.00410907,0.00189616,0.000102
 72,0.00272971,-0.00077241,-0.00381864,0.00147780,0.00035982,-0.0280876
 0,0.09051371,-0.12197996,-0.01249539,-0.00843499,0.01064193,0.00728411
 ,-0.00234515,-0.00184761,0.00508263,0.00010326,0.00007940,0.00395433,0
 .00067477,-0.00091566,-0.16957321,-0.34815307,0.56850113,-0.00053653,-
 0.00209527,0.00179674,0.00054272,0.00019486,-0.00029757,0.00036054,0.0
 0021672,-0.00034183,0.00140344,0.00047107,-0.00084612,-0.02765629,0.00
 711303,0.00321895,0.00245451,0.00275265,-0.00137183,-0.00101661,0.0001
 1096,0.00012378,0.00049751,-0.00036847,0.00026778,-0.00039755,0.000139
 50,-0.00013597,-0.25655335,0.01603612,0.03899054,0.29216145,0.00265104
 ,-0.00075814,-0.00137150,0.00016845,-0.00000259,0.00002128,-0.00045368
 ,0.00015293,-0.00005478,-0.00040411,-0.00035369,0.00044974,0.02513032,
 0.00112064,0.00096343,0.00150528,0.00114013,0.00548822,-0.00051082,-0.
 00023983,0.00026931,0.00001239,0.00000882,0.00015085,0.00166117,-0.000
 20088,-0.00071331,0.00657448,-0.05691995,-0.00293939,-0.01064241,0.050
 19558,-0.00282269,-0.00006600,-0.00057713,0.00032465,-0.00024341,0.000
 10863,-0.00028580,0.00001827,0.00013515,0.00000555,0.00020910,-0.00021
 083,-0.01431594,0.00591882,0.00738965,-0.00015865,0.00514550,0.0022404
 9,-0.00160824,-0.00028950,0.00026081,-0.00010295,0.00025570,-0.0000531
 8,0.00072044,0.00009290,-0.00039711,0.04819875,-0.00554149,-0.06594695
 ,-0.06304810,-0.02128430,0.06337906,-0.00118665,0.00365101,-0.00064858
 ,0.00041160,0.00017003,-0.00073751,0.00037069,0.00002226,0.00014640,0.
 00078287,0.00054652,-0.00081467,0.03381404,0.00449333,-0.00896200,-0.0
 0381994,-0.00085614,0.00121614,0.00210537,0.00069462,-0.00127903,0.002
 45000,0.00111701,-0.00223874,0.00188553,0.00047562,-0.00097049,-0.2060
 2827,-0.13091432,0.16451172,-0.01125985,-0.02569212,0.03309299,0.18047
 461,0.00906471,0.00553877,0.00123642,-0.00096970,-0.00115415,0.0004976
 5,-0.00131253,-0.00237948,0.00290224,-0.00104347,0.00027703,-0.0002211
 0,0.00235242,-0.04371692,0.05858190,-0.00773291,-0.00139205,0.00111595
 ,0.00178830,-0.00013079,-0.00093622,0.00144230,-0.00202214,-0.00011762
 ,0.00114340,-0.00043529,0.00063673,-0.13709594,-0.29253650,0.25315120,
 -0.01392876,0.00585698,0.01578440,0.14629218,0.33209456,-0.00591806,0.
 00272605,0.00834591,0.00125056,0.00257474,-0.00254921,0.00056687,0.000
 14375,-0.00128311,0.00073292,-0.00065844,0.00019424,-0.00687700,0.0579
 9430,-0.03741151,0.00790877,-0.00077650,-0.00385220,-0.00150009,0.0007
 7992,0.00017034,-0.00255524,-0.00002805,-0.00100495,-0.00246364,-0.000
 59535,0.00069451,0.17052752,0.25145067,-0.36283316,0.02164362,0.019020
 46,-0.00632860,-0.18331624,-0.33263155,0.40585774\\0.00000433,0.000001
 04,-0.00000153,0.00000200,-0.00000063,-0.00000003,0.00000186,-0.000000
 70,0.00000044,0.00000137,-0.00000131,0.00000107,-0.00000379,0.00000105
 ,-0.00000250,-0.00000317,0.00000146,0.00000052,0.00000039,0.00000137,-
 0.00000146,-0.00000212,0.00000172,-0.00000118,0.00000037,0.00000130,-0
 .00000144,0.00000129,-0.00000421,0.00000386,-0.00000088,-0.00000170,0.
 00000223,-0.00000164,0.00000061,0.00000002\\\@


 REALITY IS FOR PEOPLE WHO CAN'T FACE SCIENCE FICTION.
 Job cpu time:  0 days  1 hours 16 minutes 47.6 seconds.
 File lengths (MBytes):  RWF=     30 Int=      0 D2E=      0 Chk=      7 Scr=      1
 Normal termination of Gaussian 03 at Tue Sep  3 11:49:20 2013.
 Link1:  Proceeding to internal job step number  2.
 --------------------------------------------------------------
 #N Geom=AllCheck Guess=Read SCRF=Check GenChk RB3LYP/TZVP Freq
 --------------------------------------------------------------
 1/7=10,10=4,29=7,30=1,38=1,40=1,46=1/1,3;
 2/40=1/2;
 3/5=19,7=101,11=2,16=1,25=1,30=1,70=2,71=2,74=-5/1,2,3;
 4/5=1,7=1/1;
 5/5=2,38=6/2;
 8/6=4,10=90,11=11/1;
 11/6=1,8=1,9=11,15=111,16=1/1,2,10;
 10/6=1/2;
 6/7=2,8=2,9=2,10=2,18=1,28=1/1;
 7/8=1,10=1,25=1/1,2,3,16;
 1/10=4,30=1,46=1/3;
 99//99;
 -------------------
 Title Card Required
 -------------------
 Redundant internal coordinates taken from checkpoint file:
 DMF_geoopt_Freq.chk
 Charge =  0 Multiplicity = 1
 C,0,-2.9764592394,-0.7335323438,0.0886048067
 H,0,-2.8708883825,-1.7910767713,-0.1727187554
 H,0,-2.5278082948,-0.576992791,1.0745288526
 H,0,-4.0391093075,-0.4995360463,0.1531336553
 N,0,-2.3509381247,0.1129440404,-0.9074363973
 C,0,-0.9265579464,-0.0523459771,-1.1383241304
 H,0,-0.7059722069,-1.0711863964,-1.4704341405
 H,0,-0.6200890713,0.6517303676,-1.9079765782
 H,0,-0.3625038473,0.1443238532,-0.2217234842
 C,0,-3.0618541771,1.0358168934,-1.6100815816
 H,0,-4.1284394392,1.0420878399,-1.3227753
 O,0,-2.6149619128,1.7822379013,-2.459501027
 Recover connectivity data from disk.

 GradGradGradGradGradGradGradGradGradGradGradGradGradGradGradGradGradGrad
 Berny optimization.
 Initialization pass.
                           ----------------------------
                           !    Initial Parameters    !
                           ! (Angstroms and Degrees)  !
 --------------------------                            --------------------------
 ! Name  Definition              Value          Derivative Info.                !
 --------------------------------------------------------------------------------
 ! R1    R(1,2)                  1.0945         calculate D2E/DX2 analytically  !
 ! R2    R(1,3)                  1.0945         calculate D2E/DX2 analytically  !
 ! R3    R(1,4)                  1.09           calculate D2E/DX2 analytically  !
 ! R4    R(1,5)                  1.4491         calculate D2E/DX2 analytically  !
 ! R5    R(5,6)                  1.4524         calculate D2E/DX2 analytically  !
 ! R6    R(5,10)                 1.3604         calculate D2E/DX2 analytically  !
 ! R7    R(6,7)                  1.0941         calculate D2E/DX2 analytically  !
 ! R8    R(6,8)                  1.0872         calculate D2E/DX2 analytically  !
 ! R9    R(6,9)                  1.0941         calculate D2E/DX2 analytically  !
 ! R10   R(10,11)                1.1046         calculate D2E/DX2 analytically  !
 ! R11   R(10,12)                1.2159         calculate D2E/DX2 analytically  !
 ! A1    A(2,1,3)              108.2857         calculate D2E/DX2 analytically  !
 ! A2    A(2,1,4)              108.3973         calculate D2E/DX2 analytically  !
 ! A3    A(2,1,5)              111.0192         calculate D2E/DX2 analytically  !
 ! A4    A(3,1,4)              108.3972         calculate D2E/DX2 analytically  !
 ! A5    A(3,1,5)              111.0197         calculate D2E/DX2 analytically  !
 ! A6    A(4,1,5)              109.6404         calculate D2E/DX2 analytically  !
 ! A7    A(1,5,6)              117.7828         calculate D2E/DX2 analytically  !
 ! A8    A(1,5,10)             121.7148         calculate D2E/DX2 analytically  !
 ! A9    A(6,5,10)             120.5023         calculate D2E/DX2 analytically  !
 ! A10   A(5,6,7)              110.6074         calculate D2E/DX2 analytically  !
 ! A11   A(5,6,8)              108.378          calculate D2E/DX2 analytically  !
 ! A12   A(5,6,9)              110.6076         calculate D2E/DX2 analytically  !
 ! A13   A(7,6,8)              109.3505         calculate D2E/DX2 analytically  !
 ! A14   A(7,6,9)              108.528          calculate D2E/DX2 analytically  !
 ! A15   A(8,6,9)              109.3505         calculate D2E/DX2 analytically  !
 ! A16   A(5,10,11)            111.9678         calculate D2E/DX2 analytically  !
 ! A17   A(5,10,12)            125.8166         calculate D2E/DX2 analytically  !
 ! A18   A(11,10,12)           122.2157         calculate D2E/DX2 analytically  !
 ! D1    D(2,1,5,6)            -60.2573         calculate D2E/DX2 analytically  !
 ! D2    D(2,1,5,10)           119.7485         calculate D2E/DX2 analytically  !
 ! D3    D(3,1,5,6)             60.2556         calculate D2E/DX2 analytically  !
 ! D4    D(3,1,5,10)          -119.7386         calculate D2E/DX2 analytically  !
 ! D5    D(4,1,5,6)            179.9993         calculate D2E/DX2 analytically  !
 ! D6    D(4,1,5,10)             0.005          calculate D2E/DX2 analytically  !
 ! D7    D(1,5,6,7)             60.1362         calculate D2E/DX2 analytically  !
 ! D8    D(1,5,6,8)           -179.9994         calculate D2E/DX2 analytically  !
 ! D9    D(1,5,6,9)            -60.135          calculate D2E/DX2 analytically  !
 ! D10   D(10,5,6,7)          -119.8695         calculate D2E/DX2 analytically  !
 ! D11   D(10,5,6,8)            -0.0051         calculate D2E/DX2 analytically  !
 ! D12   D(10,5,6,9)           119.8593         calculate D2E/DX2 analytically  !
 ! D13   D(1,5,10,11)           -0.0035         calculate D2E/DX2 analytically  !
 ! D14   D(1,5,10,12)          179.9968         calculate D2E/DX2 analytically  !
 ! D15   D(6,5,10,11)         -179.9976         calculate D2E/DX2 analytically  !
 ! D16   D(6,5,10,12)            0.0027         calculate D2E/DX2 analytically  !
 --------------------------------------------------------------------------------
 Trust Radius=3.00D-01 FncErr=1.00D-07 GrdErr=1.00D-07
 Number of steps in this run=   2 maximum allowed number of steps=   2.
 GradGradGradGradGradGradGradGradGradGradGradGradGradGradGradGradGradGrad

                          Input orientation:                          
 ---------------------------------------------------------------------
 Center     Atomic     Atomic              Coordinates (Angstroms)
 Number     Number      Type              X           Y           Z
 ---------------------------------------------------------------------
    1          6             0       -2.976459   -0.733532    0.088605
    2          1             0       -2.870888   -1.791077   -0.172719
    3          1             0       -2.527808   -0.576993    1.074529
    4          1             0       -4.039109   -0.499536    0.153134
    5          7             0       -2.350938    0.112944   -0.907436
    6          6             0       -0.926558   -0.052346   -1.138324
    7          1             0       -0.705972   -1.071186   -1.470434
    8          1             0       -0.620089    0.651730   -1.907977
    9          1             0       -0.362504    0.144324   -0.221723
   10          6             0       -3.061854    1.035817   -1.610082
   11          1             0       -4.128439    1.042088   -1.322775
   12          8             0       -2.614962    1.782238   -2.459501
 ---------------------------------------------------------------------
                    Distance matrix (angstroms):
                    1          2          3          4          5
     1  C    0.000000
     2  H    1.094457   0.000000
     3  H    1.094458   1.774072   0.000000
     4  H    1.090020   1.771722   1.771722   0.000000
     5  N    1.449102   2.106052   2.106058   2.085632   0.000000
     6  C    2.484243   2.781366   2.781362   3.399385   1.452408
     7  H    2.774838   2.624723   3.168620   3.751341   2.103579
     8  H    3.384933   3.747602   3.747598   4.154911   2.070558
     9  H    2.774833   3.168623   2.624712   3.751333   2.103582
    10  C    2.454267   3.177075   3.177026   2.534021   1.360443
    11  H    2.543989   3.306189   3.306132   2.136093   2.048249
    12  O    3.598975   4.250112   4.250051   3.749740   2.294593
                    6          7          8          9         10
     6  C    0.000000
     7  H    1.094071   0.000000
     8  H    1.087204   1.779680   0.000000
     9  H    1.094072   1.776151   1.779680   0.000000
    10  C    2.442569   3.163723   2.489675   3.163667   0.000000
    11  H    3.388783   4.025048   3.578179   4.024993   1.104621
    12  O    2.821686   3.572748   2.358335   3.572671   1.215883
                   11         12
    11  H    0.000000
    12  O    2.032383   0.000000
 Stoichiometry    C3H7NO
 Framework group  C1[X(C3H7NO)]
 Deg. of freedom    30
 Full point group                 C1
 Largest Abelian subgroup         C1      NOp   1
 Largest concise Abelian subgroup C1      NOp   1
                         Standard orientation:                         
 ---------------------------------------------------------------------
 Center     Atomic     Atomic              Coordinates (Angstroms)
 Number     Number      Type              X           Y           Z
 ---------------------------------------------------------------------
    1          6             0        1.587840   -0.762717    0.000012
    2          1             0        2.184934   -0.529184   -0.886992
    3          1             0        2.184855   -0.529214    0.887079
    4          1             0        1.375376   -1.831830   -0.000015
    5          7             0        0.344160   -0.018971   -0.000038
    6          6             0        0.422640    1.431315    0.000004
    7          1             0        0.952675    1.788294   -0.888038
    8          1             0       -0.589084    1.829343   -0.000032
    9          1             0        0.952593    1.788251    0.888114
   10          6             0       -0.863609   -0.645150   -0.000006
   11          1             0       -0.758942   -1.744802   -0.000002
   12          8             0       -1.949094   -0.097343    0.000012
 ---------------------------------------------------------------------
 Rotational constants (GHZ):      8.9135622      4.1863595      2.9542786
 Standard basis: TZVP (5D, 7F)
 There are   137 symmetry adapted basis functions of A   symmetry.
 Integral buffers will be    131072 words long.
 Raffenetti 2 integral format.
 Two-electron integral symmetry is turned on.
   137 basis functions,   231 primitive gaussians,   142 cartesian basis functions
    20 alpha electrons       20 beta electrons
       nuclear repulsion energy       181.5264472672 Hartrees.
 NAtoms=   12 NActive=   12 NUniq=   12 SFac= 7.50D-01 NAtFMM=   80 NAOKFM=F Big=F
 One-electron integrals computed using PRISM.
 NBasis=   137 RedAO= T  NBF=   137
 NBsUse=   137 1.00D-06 NBFU=   137
 Initial guess read from the checkpoint file:
 DMF_geoopt_Freq.chk
 Initial guess orbital symmetries:
       Occupied  (A) (A) (A) (A) (A) (A) (A) (A) (A) (A) (A) (A)
                 (A) (A) (A) (A) (A) (A) (A) (A)
       Virtual   (A) (A) (A) (A) (A) (A) (A) (A) (A) (A) (A) (A)
                 (A) (A) (A) (A) (A) (A) (A) (A) (A) (A) (A) (A)
                 (A) (A) (A) (A) (A) (A) (A) (A) (A) (A) (A) (A)
                 (A) (A) (A) (A) (A) (A) (A) (A) (A) (A) (A) (A)
                 (A) (A) (A) (A) (A) (A) (A) (A) (A) (A) (A) (A)
                 (A) (A) (A) (A) (A) (A) (A) (A) (A) (A) (A) (A)
                 (A) (A) (A) (A) (A) (A) (A) (A) (A) (A) (A) (A)
                 (A) (A) (A) (A) (A) (A) (A) (A) (A) (A) (A) (A)
                 (A) (A) (A) (A) (A) (A) (A) (A) (A) (A) (A) (A)
                 (A) (A) (A) (A) (A) (A) (A) (A) (A)
 Requested convergence on RMS density matrix=1.00D-08 within 128 cycles.
 Requested convergence on MAX density matrix=1.00D-06.
 Requested convergence on             energy=1.00D-06.
 No special actions if energy rises.
 Keep R1 integrals in memory in canonical form, NReq=    54018915.
 SCF Done:  E(RB+HF-LYP) =  -248.605322383     A.U. after    1 cycles
             Convg  =    0.4468D-08             -V/T =  2.0048
             S**2   =   0.0000
 Range of M.O.s used for correlation:     1   137
 NBasis=   137 NAE=    20 NBE=    20 NFC=     0 NFV=     0
 NROrb=    137 NOA=    20 NOB=    20 NVA=   117 NVB=   117

 **** Warning!!: The largest alpha MO coefficient is  0.12232287D+02

 Symmetrizing basis deriv contribution to polar:
 IMax=3 JMax=2 DiffMx= 0.00D+00
 G2DrvN: will do   13 centers at a time, making    1 passes doing MaxLOS=2.
 FoFDir/FoFCou used for L=0 through L=2.
 DoAtom=TTTTTTTTTTTT
          Differentiating once with respect to electric field.
                with respect to dipole field.
          Differentiating once with respect to nuclear coordinates.
          Store integrals in memory, NReq=    52370486.
          There are  39 degrees of freedom in the 1st order CPHF.
    36 vectors were produced by pass  0.
 AX will form  36 AO Fock derivatives at one time.
    36 vectors were produced by pass  1.
    36 vectors were produced by pass  2.
    36 vectors were produced by pass  3.
    36 vectors were produced by pass  4.
    22 vectors were produced by pass  5.
     4 vectors were produced by pass  6.
     1 vectors were produced by pass  7.
 Inv2:  IOpt= 1 Iter= 1 AM= 2.01D-15 Conv= 1.00D-12.
 Inverted reduced A of dimension  207 with in-core refinement.
 Isotropic polarizability for W=    0.000000       48.21 Bohr**3.
 End of Minotr Frequency-dependent properties file   721 does not exist.

 **********************************************************************

            Population analysis using the SCF density.

 **********************************************************************

 Orbital symmetries:
       Occupied  (A) (A) (A) (A) (A) (A) (A) (A) (A) (A) (A) (A)
                 (A) (A) (A) (A) (A) (A) (A) (A)
       Virtual   (A) (A) (A) (A) (A) (A) (A) (A) (A) (A) (A) (A)
                 (A) (A) (A) (A) (A) (A) (A) (A) (A) (A) (A) (A)
                 (A) (A) (A) (A) (A) (A) (A) (A) (A) (A) (A) (A)
                 (A) (A) (A) (A) (A) (A) (A) (A) (A) (A) (A) (A)
                 (A) (A) (A) (A) (A) (A) (A) (A) (A) (A) (A) (A)
                 (A) (A) (A) (A) (A) (A) (A) (A) (A) (A) (A) (A)
                 (A) (A) (A) (A) (A) (A) (A) (A) (A) (A) (A) (A)
                 (A) (A) (A) (A) (A) (A) (A) (A) (A) (A) (A) (A)
                 (A) (A) (A) (A) (A) (A) (A) (A) (A) (A) (A) (A)
                 (A) (A) (A) (A) (A) (A) (A) (A) (A)
 The electronic state is 1-A.
 Alpha  occ. eigenvalues --  -19.09388 -14.35844 -10.26852 -10.22129 -10.20760
 Alpha  occ. eigenvalues --   -1.04164  -0.94970  -0.74251  -0.71208  -0.57838
 Alpha  occ. eigenvalues --   -0.52582  -0.48852  -0.47575  -0.42227  -0.41943
 Alpha  occ. eigenvalues --   -0.41226  -0.39655  -0.38554  -0.26416  -0.25444
 Alpha virt. eigenvalues --    0.01201   0.02514   0.06234   0.07080   0.08714
 Alpha virt. eigenvalues --    0.09480   0.11606   0.12927   0.13412   0.14969
 Alpha virt. eigenvalues --    0.16288   0.16683   0.19828   0.21445   0.25334
 Alpha virt. eigenvalues --    0.28647   0.30698   0.30927   0.32558   0.34754
 Alpha virt. eigenvalues --    0.35852   0.39074   0.41484   0.44687   0.45232
 Alpha virt. eigenvalues --    0.45349   0.45728   0.47156   0.48109   0.51038
 Alpha virt. eigenvalues --    0.53164   0.54850   0.57304   0.57838   0.60224
 Alpha virt. eigenvalues --    0.62352   0.69591   0.77652   0.84906   1.13340
 Alpha virt. eigenvalues --    1.19351   1.21849   1.24449   1.26661   1.27215
 Alpha virt. eigenvalues --    1.28626   1.33037   1.34176   1.34367   1.35492
 Alpha virt. eigenvalues --    1.42833   1.46496   1.49064   1.50684   1.51572
 Alpha virt. eigenvalues --    1.57444   1.58760   1.60375   1.64735   1.65468
 Alpha virt. eigenvalues --    1.70441   1.72597   1.75287   1.77484   1.78194
 Alpha virt. eigenvalues --    1.78382   1.80400   1.84637   1.91559   2.02920
 Alpha virt. eigenvalues --    2.05223   2.09723   2.10842   2.20866   2.25482
 Alpha virt. eigenvalues --    2.26720   2.27542   2.31823   2.35178   2.37319
 Alpha virt. eigenvalues --    2.40772   2.43537   2.46857   2.48559   2.52492
 Alpha virt. eigenvalues --    2.53462   2.56184   2.59038   2.63273   2.67533
 Alpha virt. eigenvalues --    2.69470   2.71426   2.71479   2.74572   2.77657
 Alpha virt. eigenvalues --    2.81643   2.85036   3.03243   3.04471   3.08820
 Alpha virt. eigenvalues --    3.11638   3.22306   3.23773   3.26717   3.27863
 Alpha virt. eigenvalues --    3.28844   3.37195   3.42296   3.48645   3.72213
 Alpha virt. eigenvalues --    3.73502   4.27219  21.84789  22.04981  22.11577
 Alpha virt. eigenvalues --   31.84277  43.48823
          Condensed to atoms (all electrons):
              1          2          3          4          5          6
     1  C    4.893440   0.409960   0.409959   0.387533   0.264402  -0.075974
     2  H    0.409960   0.597045  -0.060082  -0.025574  -0.054762  -0.004168
     3  H    0.409959  -0.060082   0.597053  -0.025576  -0.054767  -0.004166
     4  H    0.387533  -0.025574  -0.025576   0.559063  -0.033798   0.012324
     5  N    0.264402  -0.054762  -0.054767  -0.033798   6.995240   0.234503
     6  C   -0.075974  -0.004168  -0.004166   0.012324   0.234503   4.959738
     7  H   -0.006890   0.009740  -0.003428  -0.000184  -0.047583   0.408016
     8  H    0.010630  -0.000165  -0.000165  -0.000172  -0.043809   0.394944
     9  H   -0.006890  -0.003428   0.009741  -0.000184  -0.047587   0.408025
    10  C   -0.049263   0.001796   0.001795  -0.010117   0.275390  -0.060955
    11  H   -0.015316  -0.000324  -0.000324   0.015505  -0.145008   0.007808
    12  O    0.006618   0.000019   0.000019   0.000301  -0.138374  -0.023599
              7          8          9         10         11         12
     1  C   -0.006890   0.010630  -0.006890  -0.049263  -0.015316   0.006618
     2  H    0.009740  -0.000165  -0.003428   0.001796  -0.000324   0.000019
     3  H   -0.003428  -0.000165   0.009741   0.001795  -0.000324   0.000019
     4  H   -0.000184  -0.000172  -0.000184  -0.010117   0.015505   0.000301
     5  N   -0.047583  -0.043809  -0.047587   0.275390  -0.145008  -0.138374
     6  C    0.408016   0.394944   0.408025  -0.060955   0.007808  -0.023599
     7  H    0.582067  -0.021498  -0.049548   0.004658  -0.000088   0.000847
     8  H   -0.021498   0.488509  -0.021500  -0.012254   0.003492   0.034422
     9  H   -0.049548  -0.021500   0.582067   0.004655  -0.000088   0.000847
    10  C    0.004658  -0.012254   0.004655   4.610350   0.405887   0.597342
    11  H   -0.000088   0.003492  -0.000088   0.405887   0.741932  -0.055303
    12  O    0.000847   0.034422   0.000847   0.597342  -0.055303   7.956961
 Mulliken atomic charges:
              1
     1  C   -0.228210
     2  H    0.129942
     3  H    0.129940
     4  H    0.120879
     5  N   -0.203847
     6  C   -0.256495
     7  H    0.123890
     8  H    0.167567
     9  H    0.123890
    10  C    0.230717
    11  H    0.041827
    12  O   -0.380100
 Sum of Mulliken charges=   0.00000
 Atomic charges with hydrogens summed into heavy atoms:
              1
     1  C    0.152552
     2  H    0.000000
     3  H    0.000000
     4  H    0.000000
     5  N   -0.203847
     6  C    0.158852
     7  H    0.000000
     8  H    0.000000
     9  H    0.000000
    10  C    0.272544
    11  H    0.000000
    12  O   -0.380100
 Sum of Mulliken charges=   0.00000
 APT atomic charges:
              1
     1  C    0.357786
     2  H   -0.042508
     3  H   -0.042516
     4  H    0.008783
     5  N   -0.734138
     6  C    0.276664
     7  H   -0.031863
     8  H    0.058668
     9  H   -0.031868
    10  C    1.044874
    11  H   -0.042792
    12  O   -0.821090
 Sum of APT charges=   0.00000
 APT Atomic charges with hydrogens summed into heavy atoms:
              1
     1  C    0.281545
     2  H    0.000000
     3  H    0.000000
     4  H    0.000000
     5  N   -0.734138
     6  C    0.271601
     7  H    0.000000
     8  H    0.000000
     9  H    0.000000
    10  C    1.002082
    11  H    0.000000
    12  O   -0.821090
 Sum of APT charges=   0.00000
 Electronic spatial extent (au):  <R**2>=   444.5700
 Charge=     0.0000 electrons
 Dipole moment (field-independent basis, Debye):
    X=     4.1255    Y=    -0.4072    Z=     0.0000  Tot=     4.1456
 Quadrupole moment (field-independent basis, Debye-Ang):
   XX=   -37.7736   YY=   -27.8985   ZZ=   -31.3944
   XY=    -0.0480   XZ=     0.0001   YZ=     0.0000
 Traceless Quadrupole moment (field-independent basis, Debye-Ang):
   XX=    -5.4181   YY=     4.4570   ZZ=     0.9611
   XY=    -0.0480   XZ=     0.0001   YZ=     0.0000
 Octapole moment (field-independent basis, Debye-Ang**2):
  XXX=    16.6674  YYY=    -1.3198  ZZZ=     0.0002  XYY=    -1.6688
  XXY=    -0.4986  XXZ=    -0.0004  XZZ=    -0.4126  YZZ=     0.6323
  YYZ=    -0.0001  XYZ=    -0.0001
 Hexadecapole moment (field-independent basis, Debye-Ang**3):
 XXXX=  -374.5601 YYYY=  -192.8883 ZZZZ=   -45.6006 XXXY=    -4.3743
 XXXZ=    -0.0004 YYYX=    -0.2662 YYYZ=    -0.0001 ZZZX=     0.0001
 ZZZY=     0.0000 XXYY=   -87.9110 XXZZ=   -61.4981 YYZZ=   -41.4662
 XXYZ=    -0.0002 YYXZ=    -0.0001 ZZXY=     1.4597
 N-N= 1.815264472672D+02 E-N=-9.432017294987D+02  KE= 2.474062849008D+02
  Exact polarizability:  59.479   1.033  49.174   0.000   0.000  35.979
 Approx polarizability:  86.862   0.108  62.975   0.000   0.000  49.682
 Full mass-weighted force constant matrix:
 Low frequencies ---  -13.4274   -0.0006    0.0002    0.0007    9.3187   17.8184
 Low frequencies ---  117.8258  168.3564  235.9661
 Diagonal vibrational polarizability:
        9.3035441       4.7596764       5.6845230
 Harmonic frequencies (cm**-1), IR intensities (KM/Mole), Raman scattering
 activities (A**4/AMU), depolarization ratios for plane and unpolarized
 incident light, reduced masses (AMU), force constants (mDyne/A),
 and normal coordinates:
                     1                      2                      3
                     A                      A                      A
 Frequencies --   117.7969               168.3462               235.9501
 Red. masses --     1.4655                 1.1201                 1.5913
 Frc consts  --     0.0120                 0.0187                 0.0522
 IR Inten    --     0.1008                 0.0476                 1.1156
 Atom AN      X      Y      Z        X      Y      Z        X      Y      Z
   1   6     0.00   0.00  -0.05     0.00   0.00   0.06     0.00   0.00   0.08
   2   1    -0.21  -0.15  -0.23     0.22   0.26   0.28    -0.03  -0.43  -0.06
   3   1     0.21   0.15  -0.23    -0.22  -0.26   0.28     0.03   0.43  -0.06
   4   1     0.00   0.00   0.18     0.00   0.00  -0.31     0.00   0.00   0.61
   5   7     0.00   0.00   0.14     0.00   0.00  -0.06     0.00   0.00  -0.17
   6   6     0.00   0.00   0.01     0.00   0.00  -0.02     0.00   0.00   0.05
   7   1    -0.42  -0.03  -0.25    -0.35   0.06  -0.21    -0.15   0.17   0.03
   8   1     0.00   0.00   0.46     0.00   0.00   0.39     0.00   0.00   0.29
   9   1     0.42   0.03  -0.25     0.35  -0.06  -0.21     0.15  -0.17   0.03
  10   6     0.00   0.00   0.02     0.00   0.00  -0.02     0.00   0.00  -0.07
  11   1     0.00   0.00   0.08     0.00   0.00  -0.03     0.00   0.00  -0.13
  12   8     0.00   0.00  -0.10     0.00   0.00   0.03     0.00   0.00   0.06
                     4                      5                      6
                     A                      A                      A
 Frequencies --   318.9912               337.9122               396.0886
 Red. masses --     3.8560                 2.3511                 2.3821
 Frc consts  --     0.2312                 0.1582                 0.2202
 IR Inten    --    11.8131                18.6340                 1.7273
 Atom AN      X      Y      Z        X      Y      Z        X      Y      Z
   1   6    -0.12   0.01   0.00     0.00   0.00   0.05     0.09   0.19   0.00
   2   1    -0.10  -0.06   0.00    -0.05   0.00   0.01     0.02   0.42   0.01
   3   1    -0.10  -0.06   0.00     0.05   0.00   0.01     0.02   0.42  -0.01
   4   1    -0.23   0.03   0.00     0.00   0.00   0.08     0.46   0.12   0.00
   5   7    -0.04   0.14   0.00     0.00   0.00   0.16    -0.07  -0.10   0.00
   6   6     0.29   0.12   0.00     0.00   0.00  -0.08     0.12  -0.14   0.00
   7   1     0.40  -0.02   0.00    -0.01  -0.19  -0.16     0.21  -0.25   0.01
   8   1     0.40   0.42   0.00     0.00   0.00  -0.14     0.21   0.09   0.00
   9   1     0.40  -0.02   0.00     0.01   0.19  -0.16     0.21  -0.25  -0.01
  10   6    -0.01   0.03   0.00     0.00   0.00  -0.24    -0.11  -0.05   0.00
  11   1     0.21   0.05   0.00     0.00   0.00  -0.86    -0.18  -0.05   0.00
  12   8    -0.14  -0.26   0.00     0.00   0.00   0.14    -0.07   0.05   0.00
                     7                      8                      9
                     A                      A                      A
 Frequencies --   660.0165               870.5261              1017.6883
 Red. masses --     5.1025                 3.8828                 1.6059
 Frc consts  --     1.3096                 1.7336                 0.9799
 IR Inten    --     7.6802                 1.7768                 0.0000
 Atom AN      X      Y      Z        X      Y      Z        X      Y      Z
   1   6     0.35  -0.16   0.00     0.12  -0.10   0.00     0.00   0.00   0.01
   2   1     0.33  -0.14   0.00     0.11  -0.07   0.00    -0.02   0.02  -0.01
   3   1     0.33  -0.14   0.00     0.11  -0.07   0.00     0.02  -0.02  -0.01
   4   1     0.34  -0.16   0.00     0.25  -0.13   0.00     0.00   0.00  -0.02
   5   7     0.15  -0.01   0.00    -0.10  -0.07   0.00     0.00   0.00   0.05
   6   6    -0.01   0.05   0.00     0.00   0.34   0.00     0.00   0.00  -0.01
   7   1    -0.15   0.23  -0.01     0.11   0.18   0.01     0.02   0.09   0.03
   8   1    -0.13  -0.22   0.00     0.10   0.60   0.00     0.00   0.00   0.04
   9   1    -0.15   0.23   0.01     0.11   0.18  -0.01    -0.02  -0.09   0.03
  10   6    -0.13   0.19   0.00    -0.12  -0.28   0.00     0.00   0.00  -0.22
  11   1    -0.13   0.20   0.00    -0.29  -0.30   0.00     0.00   0.00   0.96
  12   8    -0.32  -0.05   0.00     0.06   0.06   0.00     0.00   0.00   0.06
                    10                     11                     12
                     A                      A                      A
 Frequencies --  1081.6341              1095.2164              1130.1687
 Red. masses --     1.3947                 1.7726                 1.2225
 Frc consts  --     0.9614                 1.2527                 0.9200
 IR Inten    --     6.2996               118.1457                 0.1025
 Atom AN      X      Y      Z        X      Y      Z        X      Y      Z
   1   6     0.11   0.04   0.00     0.00   0.14   0.00     0.00   0.00   0.10
   2   1     0.17  -0.31  -0.05     0.11  -0.30  -0.05    -0.43   0.17  -0.14
   3   1     0.17  -0.31   0.05     0.11  -0.30   0.05     0.43  -0.17  -0.14
   4   1    -0.41   0.14   0.00    -0.55   0.24   0.00     0.00   0.00  -0.21
   5   7    -0.03   0.06   0.00     0.10   0.01   0.00     0.00   0.00   0.00
   6   6    -0.11  -0.06   0.00     0.10  -0.02   0.00     0.00   0.00  -0.10
   7   1     0.18  -0.33   0.06    -0.13   0.23  -0.04     0.08   0.43   0.13
   8   1     0.11   0.48   0.00    -0.06  -0.40   0.00     0.00   0.00   0.20
   9   1     0.18  -0.33  -0.06    -0.13   0.23   0.04    -0.08  -0.43   0.13
  10   6     0.00   0.00   0.00    -0.10  -0.13   0.00     0.00   0.00   0.01
  11   1     0.02   0.01   0.00    -0.22  -0.14   0.00     0.00   0.00  -0.12
  12   8     0.00   0.00   0.00    -0.03   0.02   0.00     0.00   0.00   0.00
                    13                     14                     15
                     A                      A                      A
 Frequencies --  1177.6622              1272.8566              1412.6922
 Red. masses --     1.3689                 4.4443                 1.9700
 Frc consts  --     1.1186                 4.2424                 2.3164
 IR Inten    --     2.6433                34.7338                93.3047
 Atom AN      X      Y      Z        X      Y      Z        X      Y      Z
   1   6     0.00   0.00   0.10     0.14  -0.13   0.00    -0.07  -0.07   0.00
   2   1    -0.41   0.14  -0.14     0.11  -0.01   0.02     0.08   0.27   0.17
   3   1     0.41  -0.14  -0.14     0.11  -0.01  -0.02     0.08   0.27  -0.17
   4   1     0.00   0.00  -0.22     0.27  -0.15   0.00     0.14  -0.10   0.00
   5   7     0.00   0.00  -0.10    -0.25   0.34   0.00     0.15   0.16   0.00
   6   6     0.00   0.00   0.10     0.11  -0.18   0.00    -0.07  -0.08   0.00
   7   1    -0.10  -0.44  -0.14    -0.24   0.20  -0.07     0.18   0.04   0.17
   8   1     0.00   0.00  -0.22     0.00  -0.42   0.00     0.05   0.20   0.00
   9   1     0.10   0.44  -0.14    -0.24   0.20   0.07     0.18   0.04  -0.17
  10   6     0.00   0.00  -0.02    -0.08  -0.12   0.00    -0.05  -0.07   0.00
  11   1     0.00   0.00   0.09     0.47  -0.06   0.00    -0.70  -0.11   0.00
  12   8     0.00   0.00   0.01     0.06   0.04   0.00     0.00  -0.02   0.00
                    16                     17                     18
                     A                      A                      A
 Frequencies --  1434.8002              1443.3163              1474.3010
 Red. masses --     1.4401                 1.1839                 1.1916
 Frc consts  --     1.7467                 1.4531                 1.5260
 IR Inten    --     9.7279                 6.5186                 8.3855
 Atom AN      X      Y      Z        X      Y      Z        X      Y      Z
   1   6     0.08  -0.02   0.00     0.01   0.00   0.00    -0.08   0.07   0.00
   2   1    -0.16   0.12  -0.11     0.06  -0.05   0.02     0.24  -0.40   0.08
   3   1    -0.16   0.12   0.11     0.06  -0.05  -0.02     0.24  -0.40  -0.08
   4   1    -0.34   0.07   0.00     0.05  -0.01   0.00     0.58  -0.07   0.00
   5   7    -0.09  -0.03   0.00    -0.05   0.04   0.00    -0.02   0.00   0.00
   6   6     0.04  -0.04   0.00     0.01   0.09   0.00     0.02  -0.03   0.00
   7   1    -0.24   0.19  -0.08     0.12  -0.42  -0.13    -0.18   0.05  -0.08
   8   1     0.14   0.21   0.00    -0.24  -0.55   0.00     0.11   0.20   0.00
   9   1    -0.24   0.19   0.08     0.12  -0.42   0.13    -0.18   0.05   0.08
  10   6     0.03   0.09   0.00     0.03   0.02   0.00     0.00   0.05   0.00
  11   1    -0.69   0.03   0.00    -0.44  -0.01   0.00    -0.24   0.03   0.00
  12   8     0.06  -0.06   0.00     0.02  -0.02   0.00     0.03  -0.03   0.00
                    19                     20                     21
                     A                      A                      A
 Frequencies --  1482.9731              1504.9476              1507.8977
 Red. masses --     1.0401                 1.0422                 1.0661
 Frc consts  --     1.3477                 1.3907                 1.4283
 IR Inten    --     4.0275                17.3862                12.8879
 Atom AN      X      Y      Z        X      Y      Z        X      Y      Z
   1   6     0.00   0.00  -0.05     0.00   0.00  -0.01     0.03   0.03   0.00
   2   1    -0.08   0.47   0.05    -0.02   0.13   0.01    -0.26  -0.22  -0.24
   3   1     0.08  -0.47   0.05     0.02  -0.13   0.01    -0.26  -0.22   0.24
   4   1     0.00   0.00   0.68     0.00   0.00   0.19     0.23  -0.02   0.00
   5   7     0.00   0.00  -0.01     0.00   0.00  -0.02    -0.03   0.00   0.00
   6   6     0.00   0.00   0.02     0.00   0.00  -0.05    -0.03  -0.02   0.00
   7   1    -0.10   0.08  -0.02     0.34  -0.32   0.05     0.35   0.23   0.31
   8   1     0.00   0.00  -0.20     0.00   0.00   0.70    -0.10  -0.20   0.00
   9   1     0.10  -0.08  -0.02    -0.34   0.32   0.05     0.35   0.23  -0.31
  10   6     0.00   0.00   0.00     0.00   0.00   0.00     0.00   0.02   0.00
  11   1     0.00   0.00   0.00     0.00   0.00   0.02    -0.12   0.01   0.00
  12   8     0.00   0.00   0.00     0.00   0.00   0.00     0.02  -0.01   0.00
                    22                     23                     24
                     A                      A                      A
 Frequencies --  1542.4247              1758.1992              2944.7207
 Red. masses --     1.1916                 8.1030                 1.0837
 Frc consts  --     1.6703                14.7581                 5.5369
 IR Inten    --    20.6553               473.8776                91.0714
 Atom AN      X      Y      Z        X      Y      Z        X      Y      Z
   1   6    -0.02  -0.01   0.00    -0.01   0.00   0.00     0.00   0.00   0.00
   2   1     0.44   0.10   0.32     0.08  -0.07   0.06    -0.01  -0.01   0.03
   3   1     0.44   0.10  -0.32     0.08  -0.07  -0.06    -0.01  -0.01  -0.03
   4   1    -0.24   0.05   0.00     0.03   0.01   0.00     0.01   0.04   0.00
   5   7    -0.09  -0.06   0.00    -0.11   0.02   0.00     0.00   0.00   0.00
   6   6    -0.01   0.00   0.00     0.03  -0.04   0.00     0.00   0.00   0.00
   7   1     0.22   0.23   0.22    -0.03   0.19   0.07    -0.01  -0.01   0.02
   8   1    -0.07  -0.17   0.00     0.07   0.05   0.00     0.01  -0.01   0.00
   9   1     0.22   0.23  -0.22    -0.03   0.19  -0.07    -0.01  -0.01  -0.02
  10   6     0.01   0.05   0.00     0.61  -0.22   0.00    -0.01   0.08   0.00
  11   1     0.01   0.05   0.00    -0.45  -0.28   0.00     0.07  -0.99   0.00
  12   8     0.03  -0.02   0.00    -0.35   0.17   0.00     0.00   0.00   0.00
                    25                     26                     27
                     A                      A                      A
 Frequencies --  3010.7095              3019.0779              3055.0275
 Red. masses --     1.0361                 1.0378                 1.1046
 Frc consts  --     5.5332                 5.5733                 6.0742
 IR Inten    --    45.5224                60.7090                50.6803
 Atom AN      X      Y      Z        X      Y      Z        X      Y      Z
   1   6     0.05   0.00   0.00     0.02   0.00   0.00     0.00   0.00  -0.09
   2   1    -0.32  -0.13   0.50    -0.14  -0.05   0.21    -0.37  -0.16   0.55
   3   1    -0.32  -0.13  -0.50    -0.14  -0.05  -0.21     0.37   0.16   0.55
   4   1     0.07   0.31   0.00     0.03   0.14   0.00     0.00   0.00  -0.02
   5   7     0.00   0.00   0.00     0.00   0.00   0.00     0.00   0.00   0.00
   6   6    -0.01  -0.02   0.00     0.03   0.04   0.00     0.00   0.00  -0.02
   7   1     0.13   0.08  -0.22    -0.29  -0.19   0.51    -0.08  -0.05   0.13
   8   1    -0.11   0.04   0.00     0.26  -0.10   0.00     0.00   0.00   0.00
   9   1     0.13   0.08   0.22    -0.29  -0.19  -0.51     0.08   0.05   0.13
  10   6     0.00   0.00   0.00     0.00  -0.01   0.00     0.00   0.00   0.00
  11   1     0.00   0.04   0.00     0.00   0.06   0.00     0.00   0.00   0.00
  12   8     0.00   0.00   0.00     0.00   0.00   0.00     0.00   0.00   0.00
                    28                     29                     30
                     A                      A                      A
 Frequencies --  3063.6717              3114.6252              3150.3017
 Red. masses --     1.1047                 1.0986                 1.0973
 Frc consts  --     6.1091                 6.2790                 6.4163
 IR Inten    --    20.0471                17.1351                 1.1740
 Atom AN      X      Y      Z        X      Y      Z        X      Y      Z
   1   6     0.00   0.00  -0.02    -0.03  -0.08   0.00     0.00   0.00   0.00
   2   1    -0.08  -0.04   0.13     0.12   0.04  -0.20     0.00   0.00   0.01
   3   1     0.08   0.04   0.13     0.12   0.04   0.20     0.00   0.00  -0.01
   4   1     0.00   0.00  -0.01     0.19   0.92   0.00    -0.01  -0.04   0.00
   5   7     0.00   0.00   0.00     0.00   0.00   0.00     0.00   0.00   0.00
   6   6     0.00   0.00   0.09     0.00   0.00   0.00    -0.09   0.02   0.00
   7   1     0.34   0.22  -0.55     0.00   0.00  -0.01     0.08   0.06  -0.17
   8   1     0.00   0.00   0.02     0.03  -0.01   0.00     0.89  -0.36   0.00
   9   1    -0.34  -0.22  -0.55     0.00   0.00   0.01     0.08   0.06   0.17
  10   6     0.00   0.00   0.00     0.00   0.00   0.00     0.00   0.00   0.00
  11   1     0.00   0.00   0.00     0.00   0.03   0.00     0.00   0.00   0.00
  12   8     0.00   0.00   0.00     0.00   0.00   0.00     0.00   0.00   0.00

 -------------------
 - Thermochemistry -
 -------------------
 Temperature   298.150 Kelvin.  Pressure   1.00000 Atm.
 Atom  1 has atomic number  6 and mass  12.00000
 Atom  2 has atomic number  1 and mass   1.00783
 Atom  3 has atomic number  1 and mass   1.00783
 Atom  4 has atomic number  1 and mass   1.00783
 Atom  5 has atomic number  7 and mass  14.00307
 Atom  6 has atomic number  6 and mass  12.00000
 Atom  7 has atomic number  1 and mass   1.00783
 Atom  8 has atomic number  1 and mass   1.00783
 Atom  9 has atomic number  1 and mass   1.00783
 Atom 10 has atomic number  6 and mass  12.00000
 Atom 11 has atomic number  1 and mass   1.00783
 Atom 12 has atomic number  8 and mass  15.99491
 Molecular mass:    73.05276 amu.
 Principal axes and moments of inertia in atomic units:
                           1         2         3
     EIGENVALUES --   202.47138 431.10039 610.89066
           X            0.99985  -0.01723   0.00000
           Y            0.01723   0.99985   0.00000
           Z            0.00000   0.00000   1.00000
 This molecule is an asymmetric top.
 Rotational symmetry number  1.
 Rotational temperatures (Kelvin)      0.42778     0.20091     0.14178
 Rotational constants (GHZ):           8.91356     4.18636     2.95428
 Zero-point vibrational energy     267966.7 (Joules/Mol)
                                   64.04559 (Kcal/Mol)
 Warning -- explicit consideration of   6 degrees of freedom as
           vibrations may cause significant error
 Vibrational temperatures:    169.48   242.21   339.48   458.96   486.18
          (Kelvin)            569.88   949.62  1252.49  1464.22  1556.23
                             1575.77  1626.06  1694.39  1831.35  2032.55
                             2064.35  2076.61  2121.19  2133.66  2165.28
                             2169.53  2219.20  2529.65  4236.79  4331.73
                             4343.77  4395.50  4407.93  4481.25  4532.58
 
 Zero-point correction=                           0.102063 (Hartree/Particle)
 Thermal correction to Energy=                    0.108176
 Thermal correction to Enthalpy=                  0.109120
 Thermal correction to Gibbs Free Energy=         0.072927
 Sum of electronic and zero-point Energies=           -248.503259
 Sum of electronic and thermal Energies=              -248.497146
 Sum of electronic and thermal Enthalpies=            -248.496202
 Sum of electronic and thermal Free Energies=         -248.532395
 
                     E (Thermal)             CV                S
                      KCal/Mol        Cal/Mol-Kelvin    Cal/Mol-Kelvin
 Total                   67.881             19.993             76.174
 Electronic               0.000              0.000              0.000
 Translational            0.889              2.981             38.782
 Rotational               0.889              2.981             25.481
 Vibrational             66.104             14.032             11.911
 Vibration  1             0.608              1.935              3.136
 Vibration  2             0.625              1.881              2.454
 Vibration  3             0.655              1.786              1.833
 Vibration  4             0.705              1.637              1.315
 Vibration  5             0.718              1.600              1.222
 Vibration  6             0.763              1.479              0.977
                       Q            Log10(Q)             Ln(Q)
 Total Bot       0.285610D-33        -33.544227        -77.238436
 Total V=0       0.252035D+14         13.401461         30.858005
 Vib (Bot)       0.140788D-45        -45.851436       -105.576833
 Vib (Bot)  1    0.173571D+01          0.239476          0.551415
 Vib (Bot)  2    0.119774D+01          0.078361          0.180433
 Vib (Bot)  3    0.832549D+00         -0.079590         -0.183263
 Vib (Bot)  4    0.589658D+00         -0.229400         -0.528213
 Vib (Bot)  5    0.550230D+00         -0.259456         -0.597419
 Vib (Bot)  6    0.451276D+00         -0.345558         -0.795677
 Vib (V=0)       0.124237D+02          1.094252          2.519608
 Vib (V=0)  1    0.230629D+01          0.362914          0.835639
 Vib (V=0)  2    0.179791D+01          0.254768          0.586625
 Vib (V=0)  3    0.147115D+01          0.167658          0.386046
 Vib (V=0)  4    0.127311D+01          0.104865          0.241461
 Vib (V=0)  5    0.124347D+01          0.094637          0.217909
 Vib (V=0)  6    0.117354D+01          0.069496          0.160021
 Electronic      0.100000D+01          0.000000          0.000000
 Translational   0.245420D+08          7.389910         17.015897
 Rotational      0.826607D+05          4.917299         11.322500
 ***** Axes restored to original set *****
 -------------------------------------------------------------------
 Center     Atomic                   Forces (Hartrees/Bohr)
 Number     Number              X              Y              Z
 -------------------------------------------------------------------
    1          6          -0.000004348   -0.000001065    0.000001554
    2          1          -0.000002001    0.000000678    0.000000034
    3          1          -0.000001872    0.000000706   -0.000000475
    4          1          -0.000001368    0.000001307   -0.000001072
    5          7           0.000003854   -0.000001113    0.000002565
    6          6           0.000003208   -0.000001480   -0.000000545
    7          1          -0.000000404   -0.000001322    0.000001470
    8          1           0.000002124   -0.000001717    0.000001184
    9          1          -0.000000394   -0.000001306    0.000001416
   10          6          -0.000001338    0.000004054   -0.000003698
   11          1           0.000000820    0.000001708   -0.000002233
   12          8           0.000001721   -0.000000450   -0.000000201
 -------------------------------------------------------------------
 Cartesian Forces:  Max     0.000004348 RMS     0.000001913

 GradGradGradGradGradGradGradGradGradGradGradGradGradGradGradGradGradGrad
 Berny optimization.
 Internal  Forces:  Max     0.000006094 RMS     0.000001332
 Search for a local minimum.
 Step number   1 out of a maximum of   2
 All quantities printed in internal units (Hartrees-Bohrs-Radians)
 Second derivative matrix not updated -- analytic derivatives used.
     Eigenvalues ---    0.00121   0.00202   0.00503   0.01808   0.06073
     Eigenvalues ---    0.06144   0.06207   0.06277   0.08412   0.12671
     Eigenvalues ---    0.13153   0.14746   0.15817   0.16818   0.17402
     Eigenvalues ---    0.17862   0.21525   0.21967   0.26432   0.31647
     Eigenvalues ---    0.32368   0.32491   0.32544   0.32914   0.34177
     Eigenvalues ---    0.34952   0.36543   0.38276   0.44849   0.82217
     Eigenvalues --- 1000.000001000.000001000.000001000.000001000.00000
     Eigenvalues --- 1000.000001000.000001000.000001000.000001000.00000
     Eigenvalues --- 1000.000001000.000001000.000001000.000001000.00000
 Angle between quadratic step and forces=  80.77 degrees.
 Linear search not attempted -- first point.
 Iteration  1 RMS(Cart)=  0.00002904 RMS(Int)=  0.00000000
 Iteration  2 RMS(Cart)=  0.00000000 RMS(Int)=  0.00000000
 Variable       Old X    -DE/DX   Delta X   Delta X   Delta X     New X
                                 (Linear)    (Quad)   (Total)
    R1        2.06822   0.00000   0.00000   0.00000   0.00000   2.06822
    R2        2.06823   0.00000   0.00000   0.00000   0.00000   2.06822
    R3        2.05984   0.00000   0.00000   0.00000   0.00000   2.05984
    R4        2.73841   0.00000   0.00000   0.00001   0.00001   2.73842
    R5        2.74465   0.00000   0.00000   0.00001   0.00001   2.74466
    R6        2.57087   0.00001   0.00000   0.00001   0.00001   2.57088
    R7        2.06749   0.00000   0.00000   0.00000   0.00000   2.06749
    R8        2.05452   0.00000   0.00000   0.00000   0.00000   2.05452
    R9        2.06750   0.00000   0.00000   0.00000   0.00000   2.06749
   R10        2.08743   0.00000   0.00000   0.00000   0.00000   2.08743
   R11        2.29769   0.00000   0.00000   0.00000   0.00000   2.29768
    A1        1.88994   0.00000   0.00000   0.00000   0.00000   1.88994
    A2        1.89189   0.00000   0.00000   0.00000   0.00000   1.89189
    A3        1.93765   0.00000   0.00000   0.00000   0.00000   1.93765
    A4        1.89189   0.00000   0.00000   0.00000   0.00000   1.89189
    A5        1.93766   0.00000   0.00000  -0.00001  -0.00001   1.93765
    A6        1.91359   0.00000   0.00000   0.00000   0.00000   1.91359
    A7        2.05570   0.00000   0.00000   0.00001   0.00001   2.05571
    A8        2.12432   0.00000   0.00000  -0.00001  -0.00001   2.12432
    A9        2.10316   0.00000   0.00000   0.00000   0.00000   2.10317
   A10        1.93046   0.00000   0.00000   0.00000   0.00000   1.93046
   A11        1.89155   0.00000   0.00000   0.00000   0.00000   1.89156
   A12        1.93047   0.00000   0.00000   0.00000   0.00000   1.93046
   A13        1.90853   0.00000   0.00000   0.00000   0.00000   1.90853
   A14        1.89417   0.00000   0.00000   0.00000   0.00000   1.89417
   A15        1.90853   0.00000   0.00000   0.00000   0.00000   1.90853
   A16        1.95421   0.00000   0.00000   0.00000   0.00000   1.95421
   A17        2.19591   0.00000   0.00000   0.00000   0.00000   2.19591
   A18        2.13307   0.00000   0.00000   0.00000   0.00000   2.13306
    D1       -1.05169   0.00000   0.00000   0.00002   0.00002  -1.05167
    D2        2.09001   0.00000   0.00000  -0.00008  -0.00008   2.08992
    D3        1.05166   0.00000   0.00000   0.00001   0.00001   1.05167
    D4       -2.08983   0.00000   0.00000  -0.00008  -0.00008  -2.08992
    D5        3.14158   0.00000   0.00000   0.00001   0.00001  -3.14159
    D6        0.00009   0.00000   0.00000  -0.00009  -0.00009   0.00000
    D7        1.04957   0.00000   0.00000  -0.00001  -0.00001   1.04956
    D8       -3.14158   0.00000   0.00000  -0.00001  -0.00001   3.14159
    D9       -1.04955   0.00000   0.00000  -0.00001  -0.00001  -1.04956
   D10       -2.09212   0.00000   0.00000   0.00009   0.00009  -2.09203
   D11       -0.00009   0.00000   0.00000   0.00009   0.00009   0.00000
   D12        2.09194   0.00000   0.00000   0.00009   0.00009   2.09203
   D13       -0.00006   0.00000   0.00000   0.00006   0.00006   0.00000
   D14        3.14154   0.00000   0.00000   0.00006   0.00006   3.14159
   D15       -3.14155   0.00000   0.00000  -0.00004  -0.00004  -3.14159
   D16        0.00005   0.00000   0.00000  -0.00005  -0.00005   0.00000
         Item               Value     Threshold  Converged?
 Maximum Force            0.000006     0.000015     YES
 RMS     Force            0.000001     0.000010     YES
 Maximum Displacement     0.000059     0.000060     YES
 RMS     Displacement     0.000029     0.000040     YES
 Predicted change in Energy=-1.711529D-10
 Optimization completed.
    -- Stationary point found.
                           ----------------------------
                           !   Optimized Parameters   !
                           ! (Angstroms and Degrees)  !
 --------------------------                            --------------------------
 ! Name  Definition              Value          Derivative Info.                !
 --------------------------------------------------------------------------------
 ! R1    R(1,2)                  1.0945         -DE/DX =    0.0                 !
 ! R2    R(1,3)                  1.0945         -DE/DX =    0.0                 !
 ! R3    R(1,4)                  1.09           -DE/DX =    0.0                 !
 ! R4    R(1,5)                  1.4491         -DE/DX =    0.0                 !
 ! R5    R(5,6)                  1.4524         -DE/DX =    0.0                 !
 ! R6    R(5,10)                 1.3604         -DE/DX =    0.0                 !
 ! R7    R(6,7)                  1.0941         -DE/DX =    0.0                 !
 ! R8    R(6,8)                  1.0872         -DE/DX =    0.0                 !
 ! R9    R(6,9)                  1.0941         -DE/DX =    0.0                 !
 ! R10   R(10,11)                1.1046         -DE/DX =    0.0                 !
 ! R11   R(10,12)                1.2159         -DE/DX =    0.0                 !
 ! A1    A(2,1,3)              108.2857         -DE/DX =    0.0                 !
 ! A2    A(2,1,4)              108.3973         -DE/DX =    0.0                 !
 ! A3    A(2,1,5)              111.0192         -DE/DX =    0.0                 !
 ! A4    A(3,1,4)              108.3972         -DE/DX =    0.0                 !
 ! A5    A(3,1,5)              111.0197         -DE/DX =    0.0                 !
 ! A6    A(4,1,5)              109.6404         -DE/DX =    0.0                 !
 ! A7    A(1,5,6)              117.7828         -DE/DX =    0.0                 !
 ! A8    A(1,5,10)             121.7148         -DE/DX =    0.0                 !
 ! A9    A(6,5,10)             120.5023         -DE/DX =    0.0                 !
 ! A10   A(5,6,7)              110.6074         -DE/DX =    0.0                 !
 ! A11   A(5,6,8)              108.378          -DE/DX =    0.0                 !
 ! A12   A(5,6,9)              110.6076         -DE/DX =    0.0                 !
 ! A13   A(7,6,8)              109.3505         -DE/DX =    0.0                 !
 ! A14   A(7,6,9)              108.528          -DE/DX =    0.0                 !
 ! A15   A(8,6,9)              109.3505         -DE/DX =    0.0                 !
 ! A16   A(5,10,11)            111.9678         -DE/DX =    0.0                 !
 ! A17   A(5,10,12)            125.8166         -DE/DX =    0.0                 !
 ! A18   A(11,10,12)           122.2157         -DE/DX =    0.0                 !
 ! D1    D(2,1,5,6)            -60.2573         -DE/DX =    0.0                 !
 ! D2    D(2,1,5,10)           119.7485         -DE/DX =    0.0                 !
 ! D3    D(3,1,5,6)             60.2556         -DE/DX =    0.0                 !
 ! D4    D(3,1,5,10)          -119.7386         -DE/DX =    0.0                 !
 ! D5    D(4,1,5,6)           -180.0007         -DE/DX =    0.0                 !
 ! D6    D(4,1,5,10)             0.005          -DE/DX =    0.0                 !
 ! D7    D(1,5,6,7)             60.1362         -DE/DX =    0.0                 !
 ! D8    D(1,5,6,8)            180.0006         -DE/DX =    0.0                 !
 ! D9    D(1,5,6,9)            -60.135          -DE/DX =    0.0                 !
 ! D10   D(10,5,6,7)          -119.8695         -DE/DX =    0.0                 !
 ! D11   D(10,5,6,8)            -0.0051         -DE/DX =    0.0                 !
 ! D12   D(10,5,6,9)           119.8593         -DE/DX =    0.0                 !
 ! D13   D(1,5,10,11)           -0.0035         -DE/DX =    0.0                 !
 ! D14   D(1,5,10,12)          179.9968         -DE/DX =    0.0                 !
 ! D15   D(6,5,10,11)         -179.9976         -DE/DX =    0.0                 !
 ! D16   D(6,5,10,12)            0.0027         -DE/DX =    0.0                 !
 --------------------------------------------------------------------------------
 GradGradGradGradGradGradGradGradGradGradGradGradGradGradGradGradGradGrad

 1\1\RECHENZENTRUM RWTH AACHEN-SRVMBFD\Freq\RB3LYP\TZVP\C3H7N1O1\JENS\0
 3-Sep-2013\0\\#N Geom=AllCheck Guess=Read SCRF=Check GenChk RB3LYP/TZV
 P Freq\\Title Card Required\\0,1\C,-2.9764592394,-0.7335323438,0.08860
 48067\H,-2.8708883825,-1.7910767713,-0.1727187554\H,-2.5278082948,-0.5
 76992791,1.0745288526\H,-4.0391093075,-0.4995360463,0.1531336553\N,-2.
 3509381247,0.1129440404,-0.9074363973\C,-0.9265579464,-0.0523459771,-1
 .1383241304\H,-0.7059722069,-1.0711863964,-1.4704341405\H,-0.620089071
 3,0.6517303676,-1.9079765782\H,-0.3625038473,0.1443238532,-0.221723484
 2\C,-3.0618541771,1.0358168934,-1.6100815816\H,-4.1284394392,1.0420878
 399,-1.3227753\O,-2.6149619128,1.7822379013,-2.459501027\\Version=AM64
 L-G03RevE.01\State=1-A\HF=-248.6053224\RMSD=4.468e-09\RMSF=1.913e-06\Z
 eroPoint=0.1020631\Thermal=0.1081759\Dipole=-0.0239802,-1.165327,1.140
 8581\DipoleDeriv=0.139015,0.1598948,-0.1060524,0.102946,0.4420248,-0.1
 478338,-0.0506286,-0.1634818,0.492319,0.0691897,0.0307703,0.0287742,-0
 .0104045,-0.1885195,0.0330794,0.0195294,-0.0510976,-0.0081944,0.026972
 1,-0.0297636,-0.1052616,-0.0432835,0.0095564,-0.0176922,-0.0427728,0.0
 514537,-0.1640759,-0.1032616,0.0016034,0.0507943,0.0676419,0.062082,0.
 0057301,-0.0134822,0.0238963,0.0675279,-0.6960835,0.3917019,-0.2781253
 ,0.1746673,-0.8281755,0.4454268,-0.0668583,0.3856564,-0.6781538,0.5135
 859,-0.1371663,0.0797953,-0.0543896,0.1726347,0.1567051,-0.0007796,0.1
 794909,0.1437716,-0.0187262,0.0183055,-0.0235473,0.0897093,-0.1405736,
 -0.0727338,0.0126273,-0.0667085,0.0637107,0.0687011,-0.0016995,0.00814
 55,-0.0649044,0.0626864,0.0466919,0.0696648,0.0293036,0.0446169,-0.054
 9137,0.0354742,-0.0576776,0.0014738,0.0610198,-0.048813,-0.130278,-0.0
 445435,-0.1017113,0.8074949,-0.2401137,0.0585511,-0.3000664,1.2399654,
 -0.9581048,0.1169001,-0.9745744,1.0871611,-0.2249742,-0.0085,0.092309,
 -0.0278084,0.0642912,0.0234388,0.1111027,0.0181293,0.0323063,-0.526999
 4,-0.2205069,0.2522949,0.0644183,-0.956992,0.5341055,-0.0250246,0.6124
 756,-0.979278\Polar=48.9138534,-3.0956501,48.5283995,-0.5450127,-11.36
 29924,47.18897\PG=C01 [X(C3H7N1O1)]\NImag=0\\0.58328373,-0.03889673,0.
 53963108,0.02999516,0.02536151,0.52174807,-0.05414425,0.02884663,0.006
 85456,0.05107830,0.02753420,-0.27661117,-0.06641902,-0.02637948,0.3083
 7074,0.00834059,-0.06994336,-0.06871659,-0.01082606,0.06415388,0.07409
 234,-0.09825156,-0.01767868,-0.09772398,0.00206466,0.00116605,0.003908
 29,0.09840723,-0.02005158,-0.05729494,-0.04205737,-0.01414055,-0.00478
 081,-0.02789062,0.02240862,0.06097013,-0.09562304,-0.03954768,-0.24392
 280,-0.00493838,-0.00355116,-0.00731975,0.10272090,0.03445048,0.274160
 86,-0.29815333,0.05596585,0.01427900,-0.00126431,0.00117689,-0.0005308
 3,-0.01129574,0.00340018,0.00032805,0.32670224,0.06331509,-0.06390860,
 -0.00211702,0.02994925,-0.00470556,-0.00040892,-0.00617590,0.00094514,
 0.00035324,-0.06157913,0.06550770,0.00712506,-0.00009552,-0.05005875,0
 .00861674,-0.00204110,-0.00068523,-0.02750537,0.00726579,0.00369531,-0
 .01748177,-0.00279668,0.05276458,-0.12872450,-0.02490230,0.04333879,0.
 00194108,0.00071076,-0.00226275,0.00778155,0.00956737,-0.00558457,-0.0
 1700379,-0.02275962,0.02634760,0.60815786,-0.01752190,-0.12434798,0.06
 813701,-0.01813358,-0.02240693,0.03254997,-0.00002688,-0.00012880,0.01
 148085,-0.00009570,0.00403088,-0.00561231,-0.09693051,0.43034900,0.036
 15322,0.07016383,-0.13754861,0.00150710,0.00981097,0.00249174,0.018327
 44,0.02639647,-0.02562739,0.00428565,0.00062175,-0.00354594,-0.0426111
 0,-0.28486749,0.39927774,-0.01711678,-0.00149694,0.00574460,0.00191871
 ,0.00168927,-0.00185392,0.00250063,0.00150838,-0.00218118,0.00086620,0
 .00012052,-0.00026198,-0.20275214,0.01316719,0.02470804,0.47286658,-0.
 02181451,0.00307619,0.00151904,-0.00168910,0.00064543,0.00062990,0.000
 45988,0.00032464,-0.00019878,-0.00275724,-0.00233260,0.00336049,0.0208
 8953,-0.09070943,0.01798261,0.00809932,0.58655555,0.02552263,-0.004069
 31,-0.00458694,-0.00104791,-0.00051588,0.00100835,0.00132227,-0.000270
 69,0.00074752,0.00253941,0.00256887,-0.00285850,0.01718550,0.02010817,
 -0.09063002,0.01512565,-0.03144693,0.58298348,0.00167300,0.00254103,-0
 .00125602,0.00023098,-0.00116330,0.00000610,-0.00019878,-0.00043720,0.
 00020891,0.00015450,-0.00018142,-0.00032616,-0.02173927,0.03805288,0.0
 0930180,-0.05297809,0.03443342,0.01182597,0.06807916,-0.00054735,0.001
 32024,0.00084431,0.00092548,0.00017475,-0.00091930,-0.00011020,-0.0002
 3911,-0.00032055,0.00014761,0.00028046,0.00002665,0.00814633,0.0007722
 6,0.00275267,0.03861592,-0.27269141,-0.07166887,-0.04885201,0.29277925
 ,-0.00029418,-0.00145541,0.00029468,0.00009075,0.00037202,0.00007217,-
 0.00013993,-0.00017556,-0.00021270,-0.00010348,0.00025564,0.00007340,0
 .00574649,-0.00285922,0.00095179,0.01259660,-0.07177549,-0.07305842,-0
 .01543056,0.08047810,0.07192350,-0.00573009,0.00278531,-0.00116641,0.0
 0013553,0.00004705,-0.00027176,0.00016113,0.00021346,0.00005252,-0.001
 02782,-0.00098904,0.00138016,-0.01594923,-0.02425358,0.02759571,-0.068
 46120,-0.04295586,0.04683915,0.00185692,0.00278322,-0.00495552,0.08150
 456,0.00063919,-0.00016972,-0.00012156,0.00016066,0.00023148,0.0000145
 7,-0.00000751,-0.00009549,0.00022132,0.00053640,0.00023396,0.00010129,
 -0.00052228,0.00347072,-0.00465165,-0.05256057,-0.16595179,0.12714162,
 -0.00769083,-0.01698895,0.02091331,0.05379054,0.17412038,0.00092262,-0
 .00071184,0.00032521,0.00001677,0.00022781,-0.00002454,-0.00013151,-0.
 00002148,0.00027685,-0.00010472,0.00052088,0.00001140,0.00449499,0.001
 87574,-0.00451754,0.05618841,0.12449945,-0.18683461,-0.00473834,-0.007
 74334,0.00989337,-0.06154983,-0.13747151,0.19884000,0.00140430,0.00109
 311,-0.00280589,-0.00012164,-0.00031097,0.00031799,0.00020984,-0.00028
 339,0.00119544,0.00029404,0.00026170,0.00026019,-0.03359266,0.00124279
 ,-0.02786120,-0.10420905,-0.02348744,-0.10127665,0.00401132,-0.0003104
 5,0.00395821,0.00571907,0.00369246,0.00730118,0.12737676,-0.00042245,0
 .00000434,-0.00072692,0.00006035,-0.00015486,-0.00030686,-0.00003765,0
 .00014568,0.00006048,0.00010591,-0.00004614,0.00015513,0.00348057,0.00
 242630,0.00675915,-0.02430568,-0.05871567,-0.04153601,-0.01480658,-0.0
 0558971,-0.02695654,0.01157327,0.00603338,0.01712987,0.02269301,0.0565
 0916,0.00071410,0.00030653,0.00187962,-0.00001298,-0.00025979,-0.00037
 410,-0.00116188,-0.00058876,0.00012247,-0.00013115,-0.00002621,0.00026
 050,0.00262562,0.00476052,0.01115004,-0.10532096,-0.04050431,-0.235801
 08,-0.00376748,-0.00159494,-0.00852132,-0.01034847,-0.00647832,-0.0169
 9139,0.11669959,0.04524940,0.24889352,0.01748264,-0.00981303,0.0015920
 4,-0.00279337,-0.00483536,0.00420742,-0.00211018,-0.00242426,0.0040167
 6,-0.00145830,-0.00297903,0.00350633,-0.20427665,0.09289292,-0.0456636
 3,-0.03126944,0.02692550,-0.01788036,-0.00217850,-0.00160414,-0.000313
 14,-0.00115637,0.00121340,-0.00042860,-0.00257995,0.00104412,0.0018100
 7,0.69292184,-0.00394972,-0.02648007,0.01571510,0.00120159,0.00039366,
 0.00160181,0.00176848,0.00238011,-0.00579565,0.00454680,0.00007142,-0.
 00059238,0.07483740,-0.16085976,0.09548640,0.02139023,0.00005100,-0.00
 691512,-0.00317349,0.00055284,0.00187006,-0.00444905,0.00112935,0.0016
 6118,-0.00739538,0.00002370,-0.00078755,0.03010140,0.53219429,-0.00411
 541,0.01733120,-0.02718267,-0.00183581,-0.00410907,0.00189616,0.000102
 72,0.00272971,-0.00077241,-0.00381863,0.00147780,0.00035982,-0.0280876
 5,0.09051368,-0.12197998,-0.01249539,-0.00843500,0.01064192,0.00728412
 ,-0.00234515,-0.00184761,0.00508262,0.00010327,0.00007940,0.00395433,0
 .00067477,-0.00091566,-0.16957321,-0.34815302,0.56850129,-0.00053652,-
 0.00209527,0.00179674,0.00054272,0.00019486,-0.00029757,0.00036054,0.0
 0021672,-0.00034183,0.00140344,0.00047107,-0.00084612,-0.02765628,0.00
 711305,0.00321893,0.00245451,0.00275265,-0.00137182,-0.00101661,0.0001
 1096,0.00012378,0.00049751,-0.00036847,0.00026778,-0.00039755,0.000139
 50,-0.00013597,-0.25655339,0.01603611,0.03899058,0.29216144,0.00265105
 ,-0.00075814,-0.00137150,0.00016845,-0.00000259,0.00002128,-0.00045368
 ,0.00015293,-0.00005478,-0.00040411,-0.00035369,0.00044974,0.02513031,
 0.00112063,0.00096344,0.00150528,0.00114013,0.00548822,-0.00051082,-0.
 00023983,0.00026931,0.00001239,0.00000882,0.00015085,0.00166117,-0.000
 20088,-0.00071331,0.00657446,-0.05691986,-0.00293940,-0.01064241,0.050
 19552,-0.00282269,-0.00006600,-0.00057712,0.00032465,-0.00024341,0.000
 10863,-0.00028580,0.00001827,0.00013515,0.00000555,0.00020910,-0.00021
 083,-0.01431593,0.00591882,0.00738964,-0.00015864,0.00514550,0.0022404
 9,-0.00160824,-0.00028950,0.00026081,-0.00010295,0.00025570,-0.0000531
 8,0.00072044,0.00009290,-0.00039711,0.04819880,-0.00554149,-0.06594688
 ,-0.06304810,-0.02128429,0.06337901,-0.00118665,0.00365101,-0.00064859
 ,0.00041160,0.00017003,-0.00073751,0.00037069,0.00002226,0.00014640,0.
 00078287,0.00054652,-0.00081466,0.03381403,0.00449332,-0.00896197,-0.0
 0381993,-0.00085615,0.00121615,0.00210537,0.00069463,-0.00127903,0.002
 44999,0.00111701,-0.00223874,0.00188552,0.00047562,-0.00097049,-0.2060
 2832,-0.13091438,0.16451175,-0.01125982,-0.02569208,0.03309293,0.18047
 466,0.00906471,0.00553876,0.00123642,-0.00096970,-0.00115415,0.0004976
 5,-0.00131253,-0.00237948,0.00290224,-0.00104347,0.00027702,-0.0002211
 0,0.00235244,-0.04371687,0.05858186,-0.00773291,-0.00139204,0.00111594
 ,0.00178830,-0.00013079,-0.00093622,0.00144230,-0.00202214,-0.00011762
 ,0.00114340,-0.00043529,0.00063673,-0.13709598,-0.29253667,0.25315120,
 -0.01392876,0.00585696,0.01578439,0.14629221,0.33209470,-0.00591806,0.
 00272605,0.00834591,0.00125056,0.00257474,-0.00254920,0.00056687,0.000
 14375,-0.00128311,0.00073292,-0.00065844,0.00019424,-0.00687699,0.0579
 9426,-0.03741148,0.00790877,-0.00077650,-0.00385220,-0.00150009,0.0007
 7992,0.00017034,-0.00255524,-0.00002805,-0.00100495,-0.00246364,-0.000
 59535,0.00069451,0.17052753,0.25145068,-0.36283338,0.02164360,0.019020
 44,-0.00632860,-0.18331624,-0.33263150,0.40585791\\0.00000435,0.000001
 07,-0.00000155,0.00000200,-0.00000068,-0.00000003,0.00000187,-0.000000
 71,0.00000047,0.00000137,-0.00000131,0.00000107,-0.00000385,0.00000111
 ,-0.00000256,-0.00000321,0.00000148,0.00000054,0.00000040,0.00000132,-
 0.00000147,-0.00000212,0.00000172,-0.00000118,0.00000039,0.00000131,-0
 .00000142,0.00000134,-0.00000405,0.00000370,-0.00000082,-0.00000171,0.
 00000223,-0.00000172,0.00000045,0.00000020\\\@


 Some scientists claim that hydrogen, because it is so
 plentiful, is the basic building block of the universe. 
 I dispute that. I say that stupidity is far more
 abundant than hydrogen, and THAT is the basic building 
 block of the universe.
                   --Frank Zappa
 Job cpu time:  0 days  0 hours  7 minutes 59.8 seconds.
 File lengths (MBytes):  RWF=     30 Int=      0 D2E=      0 Chk=      7 Scr=      1
 Normal termination of Gaussian 03 at Tue Sep  3 11:53:42 2013.
