# Supplementary material for: CO from CO2and fluctuating renewable energy via formic-acid derivatives
Source: Royal Society of Chemistry journal article supplement (doi:10.1039/c6gc01202g), 2016-01-01
Supplement: c6gc01202g9.xlsx [file c6gc01202g9.xlsx]

## Sheet: 150_top_systems_at_level2
SM	PF	Solvent_role	Solvent	CASNumber	E1 [kJ/mol CO]	E2 [kJ/mol CO]
DMF	SBPA	Extraction_solvent	3,5-dimethylpiperidine	035794-11-7	27.7801	23.7194
DMF	SBPA	Extraction_solvent	4-ethyl-2-methylpyridine	000536-88-9	27.2631	23.9722
DMF	SBPA	Extraction_solvent	maleonitrile	000928-53-0	20.9422	24.2394
DMF	SBPA	Extraction_solvent	n-methylcyclohexanamine	000100-60-7	28.1877	24.3746
DMF	SBPA	Extraction_solvent	3,5-xylidine	000108-69-0	9.1058	24.5393
DMF	SBPA	Extraction_solvent	methanesulfonyl-chloride	000124-63-0	12.2215	24.715
DMF	SBPA	Extraction_solvent	n-ethylisopropylamine	019961-27-4	28.8141	24.9366
DEF	SBPA	Extraction_solvent	2,4-dimethyl-4-nonanol	074356-31-3	31.5276	24.9465
DMF	SBPA	Extraction_solvent	3,5-dimethylpyridine	000591-22-0	28.4996	24.9797
DMF	SBPA	Extraction_solvent	1,1'-oxybis-2-ethoxy-ethane	000112-36-7	23.7524	25.0417
DMF	SBPA	Extraction_solvent	octahydroazocine	001121-92-2	28.6966	25.2483
DMF	SBPA	Extraction_solvent	2,4,6-collidine	000108-75-8	27.2673	25.2585
DMF	SBPA	Extraction_solvent	2-methyl-5-ethylpyridine	000104-90-5	27.7266	25.3531
DMF	SBPA	Extraction_solvent	pyridine,2-methyl-5-vinyl	000140-76-1	24.9859	25.4464
DMF	SBPA	Extraction_solvent	3-ethylpyridine	000536-78-7	28.0429	25.6082
DMF	SBPA	Extraction_solvent	1,2-ethanedioldinitrate	000628-96-6	17.2669	25.7514
DMF	SBPA	Extraction_solvent	4-vinylpyridine	000100-43-6	25.2346	26.0912
DMF	SBPA	Extraction_solvent	4-propylpyridine	001122-81-2	27.9947	26.2399
DMF	SBPA	Extraction_solvent	1-chloro-2-butanol	001873-25-2	22.5406	26.4089
DMF	SBPA	Extraction_solvent	2,4-difluoroaniline	000367-25-9	9.1058	26.4729
DMF	SBPA	Extraction_solvent	4-ethylpyridine	000536-75-4	28.1341	26.5451
DMF	SBPA	Extraction_solvent	6-methylheptan-3-ol	018720-66-6	28.9307	26.6373
DMF	SBPA	Extraction_solvent	3-ethyl-2-methyl-3-pentanol	000597-05-7	18.9038	26.7359
DMF	SBPA	Extraction_solvent	2,3-dichloroaniline	000608-27-5	9.1058	26.7667
DMF	SBPA	Extraction_solvent	3-(trifluoromethyl)aniline	000098-16-8	9.1058	26.7763
DMF	SBPA	Extraction_solvent	m-fluoroaniline	000372-19-0	12.9379	26.8214
DMF	SBPA	Extraction_solvent	chloronitromethane	001794-84-9	9.1058	26.9404
DMF	SBPA	Extraction_solvent	2,3-dimethyl-3-pentanol	000595-41-5	28.5686	26.9583
DMF	SBPA	Extraction_solvent	2,5-dimethylpyridine	000589-93-5	27.2817	27.0005
DMF	SBPA	Extraction_solvent	o-fluoroaniline	000348-54-9	9.1058	27.0583
DMF	SBPA	Extraction_solvent	3-ethyl-3-hexanol	000597-76-2	22.4898	27.0915
DMF	SBPA	Extraction_solvent	dibutylamine	000111-92-2	29.0359	27.0959
DMF	SBPA	Extraction_solvent	2,2-dimethyl-3-hexanol	004209-90-9	21.69	27.1007
DMF	SBPA	Extraction_solvent	2,3,4-trimethyl-3-pentanol	003054-92-0	23.9473	27.1448
DMF	SBPA	Extraction_solvent	2,3-dimethylpyridine	000583-61-9	26.514	27.1537
DMF	SBPA	Extraction_solvent	3-chlorobenzeneamine	000108-42-9	9.1058	27.1842
DMF	SBPA	Extraction_solvent	bromonitromethane	000563-70-2	9.1058	27.2038
DMF	SBPA	Extraction_solvent	2,4-dimethyl-3-pentanol	000600-36-2	24.6962	27.278
DMF	SBPA	Extraction_solvent	1,1,2-trichloro-2-fluoroethane	000359-28-4	9.1058	27.3651
DMF	SBPA	Extraction_solvent	n,n-dimethylprop-2-yn-1-amine	007223-38-3	24.2031	27.419
DMF	SBPA	Extraction_solvent	5-nonanol	000623-93-8	28.6211	27.4573
DMF	SBPA	Extraction_solvent	2-methyl-3-heptanol	018720-62-2	27.8962	27.4699
DMF	SBPA	Extraction_solvent	2,6-dimethylpyridine	000108-48-5	27.9729	27.5005
DMF	SBPA	Extraction_solvent	nicotine	000054-11-5	29.5636	27.591
DMF	SBPA	Extraction_solvent	a-ethylbenzylalcohol	000093-54-9	23.607	27.6595
DMF	SBPA	Extraction_solvent	sec-phenethylalcohol	000098-85-1	24.1566	27.7487
DMF	SBPA	Extraction_solvent	n,n'-bis(1,1-dimethylethyl)urea	005336-24-3	13.7476	27.8123
DMF	SBPA	Extraction_solvent	3,6-dimethyl-3-heptanol	001573-28-0	27.554	27.8193
DMF	SBPA	Extraction_solvent	4-ethylaniline	000589-16-2	9.1058	27.8227
DMF	SBPA	Extraction_solvent	oxybischloromethane	000542-88-1	26.4539	27.8381
DMF	SBPA	Extraction_solvent	4-methyl-4-heptanol	000598-01-6	28.7556	27.8415
DMF	SBPA	Extraction_solvent	1,3-dichloro-2-propanol	000096-23-1	17.4406	27.9057
DMF	SBPA	Extraction_solvent	3-pentanol	000584-02-1	30.296	27.9729
DMF	SBPA	Extraction_solvent	3-methyl-4-heptanol	001838-73-9	28.4504	28.0178
DMF	SBPA	Extraction_solvent	3-methoxyaniline	000536-90-3	24.2721	28.0306
DMF	SBPA	Extraction_solvent	2-methyl-benzeneamine	000095-53-4	9.1058	28.079
DMF	SBPA	Extraction_solvent	2-ethylpyridine	000100-71-0	25.7479	28.1564
DMF	SBPA	Extraction_solvent	3-methyoxypyridine	007295-76-3	26.0774	28.169
DMF	SBPA	Extraction_solvent	aniline	000062-53-3	17.6973	28.2042
DMF	SBPA	Extraction_solvent	4-methyl-2-methoxyphenol	000093-51-6	22.0762	28.2109
DMF	SBPA	Extraction_solvent	2-(1-methylethyl)benzenamine	000643-28-7	13.7531	28.2312
DMF	SBPA	Extraction_solvent	3,3-dimethylpiperidine	001193-12-0	28.4479	28.2943
DMF	SBPA	Extraction_solvent	2,2-dimethyl-3-pentanol	003970-62-5	23.725	28.2961
DMF	SBPA	Extraction_solvent	n,4-dimethylaniline	000623-08-5	29.902	28.3376
DMF	SBPA	Extraction_solvent	2-methylpyridine	000109-06-8	27.4107	28.3555
DMF	SBPA	Extraction_solvent	1,5-hexadiyne	000628-16-0	11.9	28.358
DMF	SBPA	Extraction_solvent	benzenepropanol	000122-97-4	28.3866	28.3892
DMF	SBPA	Extraction_solvent	ethylchloroacetate	000105-39-5	26.5875	28.3909
DMF	SBPA	Extraction_solvent	2-methylaminopyridine	004597-87-9	19.0728	28.423
DMF	SBPA	Extraction_solvent	1,6-heptadien-4-ol	002883-45-6	30.706	28.4379
DMF	SBPA	Extraction_solvent	3,6-dimethyl-3-octanol	000151-19-9	29.5141	28.4852
DMF	SBPA	Extraction_solvent	2-n-propylpyridine	000622-39-9	26.5861	28.4898
DMF	SBPA	Extraction_solvent	m-ethylaniline	000587-02-0	9.1058	28.5056
DMF	SBPA	Extraction_solvent	p-isopropylaniline	000099-88-7	9.1058	28.5056
DEF	SBPA	Extraction_solvent	1,5-hexadien-3-ol	000924-41-4	25.6137	28.5078
DMF	SBPA	Extraction_solvent	2-methyl-3-hexanol	000617-29-8	29.5185	28.5981
DMF	SBPA	Extraction_solvent	2,6-xylidine	000087-62-7	16.0163	28.6049
DMF	SBPA	Extraction_solvent	4-methylene-2-oxetanone	000674-82-8	29.5233	28.6049
DMF	SBPA	Extraction_solvent	2,3-xylidine	000087-59-2	9.2526	28.6217
DMF	SBPA	Extraction_solvent	1,6-heptadiyne	002396-63-6	17.9304	28.6319
DMF	SBPA	Extraction_solvent	a-methyl-2-furanmethanol	004208-64-4	27.2891	28.6562
DMF	SBPA	Extraction_solvent	2,3,3,-trimethyl-2-butanol	000594-83-2	27.5044	28.6562
DMF	SBPA	Extraction_solvent	cumene-hydroperoxide	000080-15-9	15.6926	28.7383
DMF	SBPA	Extraction_solvent	p-fluoroaniline	000371-40-4	20.2971	28.7476
DMF	SBPA	Extraction_solvent	2-chloroaniline	000095-51-2	9.1058	28.79
DEF	SBPA	Extraction_solvent	2-chlorophenol	000095-57-8	12.44	28.8318
DMF	SBPA	Extraction_solvent	m-methylbenzylalcohol	000587-03-1	26.7525	28.8569
DMF	SBPA	Extraction_solvent	2,4-dimethylpyrrole	000625-82-1	9.1058	28.9415
DMF	SBPA	Extraction_solvent	o-anisidine	000090-04-0	9.33854	29.0195
DMF	SBPA	Extraction_solvent	3-chloropropyne	000624-65-7	9.1058	29.0652
DMF	SBPA	Extraction_solvent	2-phenoxyethanol	000122-99-6	21.7042	29.073
DMF	SBPA	Extraction_solvent	n,n-dimethyl-1-butanamine	000927-62-8	30.4767	29.1071
DMF	SBPA	Extraction_solvent	4-chloropyridine	000626-61-9	24.4718	29.1677
DEF	SBPA	Extraction_solvent	a-ethylbenzylalcohol	000093-54-9	26.0124	29.1925
DEF	SBPA	Extraction_solvent	2-methyl-pent-3-en-2-ol	063468-05-3	28.67	29.2482
DMF	SBPA	Extraction_solvent	1,1,2,2-tetrachloroethane	000079-34-5	18.9642	29.2584
DEF	SBPA	Extraction_solvent	3,5-xylidine	000108-69-0	28.5872	29.2596
DEF	SBPA	Extraction_solvent	4-methyl-2-methoxyphenol	000093-51-6	27.8729	29.35
DEF	SBPA	Extraction_solvent	1-ethynylcyclohexanol	000078-27-3	12.3097	29.3637
DMF	SBPA	Extraction_solvent	3-chloropyridine	000626-60-8	22.1698	29.4248
DMF	SBPA	Extraction_solvent	3,3-dimethyl-2-butanone	000075-97-8	30.5534	29.4312
DMF	SBPA	Extraction_solvent	p,alpha-dimethylbenzylalcohol	000536-50-5	26.3079	29.4396
DMF	SBPA	Extraction_solvent	sec-butenylglycolether	100524-60-5	29.364	29.4536
DMF	SBPA	Extraction_solvent	chinoline	000091-22-5	23.5612	29.4824
DMF	SBPA	Extraction_solvent	3-methylaniline	000108-44-1	9.1058	29.4832
DMF	SBPA	Extraction_solvent	propyleneglycolmonoallylether	021460-36-6	28.9323	29.4853
DMF	SBPA	Extraction_solvent	methoxypyrazine	003149-28-8	30.5632	29.4991
DMF	SBPA	Extraction_solvent	1,3-dioxol-2-one	000872-36-6	17.2821	29.5156
DMF	SBPA	Extraction_solvent	2-methyl-thiazole	003581-87-1	21.9031	29.5179
DMF	SBPA	Extraction_solvent	crotylglycolether	052458-04-5	28.0829	29.5895
DMF	SBPA	Extraction_solvent	cyclobutylmethylketone	003019-25-8	29.9161	29.5936
DMF	SBPA	Extraction_solvent	1-phenoxy-2-propanol	000770-35-4	21.0789	29.6173
DMF	SBPA	Extraction_solvent	1,4-dichloro-2-butyne	000821-10-3	16.2939	29.6578
DEF	SBPA	Extraction_solvent	tetranitro-methane	000509-14-8	25.4882	29.6695
DMF	SBPA	Extraction_solvent	2-acetothiophene	000088-15-3	29.1028	29.6743
DMF	SBPA	Extraction_solvent	n-propyllactate	000616-09-1	29.2135	29.6919
DMF	SBPA	Extraction_solvent	3-methyl-2-butanone	000563-80-4	28.8172	29.6992
DEF	SBPA	Extraction_solvent	m-ethylaniline	000587-02-0	31.1701	29.7509
DEF	SBPA	Extraction_solvent	1-heptanol	000111-70-6	28.419	29.7567
DMF	SBPA	Extraction_solvent	2,4,5-trimethylthiazole	013623-11-5	27.1889	29.7752
DMF	SBPA	Extraction_solvent	phenyl-hydrazine	000100-63-0	14.5099	29.7916
DEF	SBPA	Extraction_solvent	2-ethyl-1h-pyrrole	001551-06-0	20.7383	29.8051
DEF	SBPA	Extraction_solvent	benzylalcohol	000100-51-6	12.3944	29.8482
DMF	SBPA	Extraction_solvent	5-hexen-2-one	000109-49-9	24.4744	29.8552
DEF	SBPA	Extraction_solvent	2-methyl-3-heptanol	018720-62-2	27.4498	29.8668
DEF	SBPA	Extraction_solvent	1,2-ethanedioldinitrate	000628-96-6	23.1491	29.8679
DEF	SBPA	Extraction_solvent	3-methyl-4-heptanol	001838-73-9	27.7785	29.8804
DEF	SBPA	Extraction_solvent	2-hexanol	000626-93-7	27.0818	29.9025
DMF	SBPA	Extraction_solvent	2-phenylethanol	000060-12-8	27.8422	29.9058
DMF	SBPA	Extraction_solvent	dipropylamine	000142-84-7	19.9831	29.9285
DMF	SBPA	Extraction_solvent	furazan	000288-37-9	22.0527	29.9523
DEF	SBPA	Extraction_solvent	4-ethylaniline	000589-16-2	27.6944	29.9574
DEF	SBPA	Extraction_solvent	methyl-3-mercaptopropionate	002935-90-2	28.4418	29.9609
DEF	SBPA	Extraction_solvent	4-methyl-3-heptanol	014979-39-6	28.0032	29.9761
DMF	SBPA	Extraction_solvent	1,2-dichloro-1-fluoroethane	000430-57-9	15.3283	29.9795
DMF	SBPA	Extraction_solvent	4-methylthiazole	000693-95-8	21.3779	29.9946
DMF	SBPA	Extraction_solvent	3-chloropropanenitrile	000542-76-7	21.1373	30.0123
DMF	SBPA	Extraction_solvent	thiazole	000288-47-1	19.9163	30.0195
DMF	SBPA	Extraction_solvent	2,3-dichloro-1-propanol	000616-23-9	15.1389	30.0368
DEF	SBPA	Extraction_solvent	2,4-dimethylpyrrole	000625-82-1	21.7114	30.0605
DMF	SBPA	Extraction_solvent	carvon	000099-49-0	27.1474	30.1022
DEF	SBPA	Extraction_solvent	2,4-dimethyl-3-pentanol	000600-36-2	24.71	30.1079
DMF	SBPA	Extraction_solvent	4-methylquinoline	000491-35-0	24.6522	30.109
DMF	SBPA	Extraction_solvent	1,1,2-trichloroethane	000079-00-5	20.9711	30.1202
DMF	SBPA	Extraction_solvent	n-methylaniline	000100-61-8	22.6966	30.1216
DMF	SBPA	Extraction_solvent	2-ethyl-1h-pyrrole	001551-06-0	9.1058	30.13
DMF	SBPA	Extraction_solvent	acetophenone	000098-86-2	23.9387	30.1325
DMF	SBPA	Extraction_solvent	2,6-dimethyl-4-heptanol	000108-82-7	27.7185	30.1339
DEF	SBPA	Extraction_solvent	2,5-xylidine	000095-78-3	30.0709	30.1369
DEF	SBPA	Extraction_solvent	1-phenoxy-2-propanol	000770-35-4	24.0505	30.1461

## Sheet: Experimentally-based-systems
SM	PF	Solvent_role	Solvent	CASNumber	E1 [kJ/mol CO]	E2 [kJ/mol CO]	Eexp [kJ/mol CO]
DIPF	SBPA		No solv				27.7325
DMF	SBPA	Catalyst_solvent	n-decane	000124-18-5	35.1859	38.7269	38.2897
DMF	SBPA	Catalyst_solvent	3-methyl-hexane	000589-34-4	35.0759	38.9082	38.4227
DMF	SBPA	Catalyst_solvent	methylcyclohexane	000108-87-2	35.2205	38.8963	38.429
DMF	SBPA	Catalyst_solvent	1,1-dimethylcyclopentane	001638-26-2	35.3688	40.1717	38.4729
DMF	SBPA	Catalyst_solvent	2,3-dimethylpentane	000565-59-3	35.1682	38.9712	38.4886
DMF	SBPA	Catalyst_solvent	n-heptane	000142-82-5	35.05	38.8377	38.5196
DMF	SBPA	Catalyst_solvent	octane	000111-65-9	35.099	38.6898	38.6121
DMF	SBPA	Catalyst_solvent	cyclohexane	000110-82-7	35.1128	39.0621	38.674
DMF	SBPA	Catalyst_solvent	hexane	000110-54-3	35.0051	39.0637	38.7456
DMF	SBPA	Catalyst_solvent	1,2-dimethylbenzene	000095-47-6	43.1387	40.5214	38.9251
DMF	SBPA	Catalyst_solvent	2-methylpentane	000107-83-5	35.0514	39.1856	38.9286
DMF	SBPA	Catalyst_solvent	1,3-dimethylbenzene	000108-38-3	41.8271	40.3797	38.9596
DMF	SBPA	Catalyst_solvent	cyclopentane	000287-92-3	35.1637	39.4943	38.9681
DMF	SBPA	Catalyst_solvent	n-nonane	000111-84-2	35.1377	38.7192	38.9927
DMF	SBPA	Catalyst_solvent	2-methyl-2-butene	000513-35-9	36.7344	40.3077	39.0157
DMF	SBPA	Catalyst_solvent	1-heptene	000592-76-7	36.5352	39.2818	39.0548
DMF	SBPA	Catalyst_solvent	1-hexene	000592-41-6	36.7417	39.8144	39.0861
DMF	SBPA	Catalyst_solvent	1,4-dimethylbenzene	000106-42-3	41.7645	40.3205	39.2802
DMF	SBPA	Catalyst_solvent	pentane	000109-66-0	34.9565	39.2954	39.2887
DMF	SBPA	Catalyst_solvent	pentene	000109-67-1	37.0647	40.4962	39.3343
DMF	SBPA	Catalyst_solvent	ethylbenzene	000100-41-4	42.3866	40.4447	39.5193
DMF	SBPA	Catalyst_solvent	ccl4	000056-23-5	36.81	39.7413	40.9072
DMF	SBPA	Catalyst_solvent	diisopropylether	000108-20-3	55.1043	46.5407	44.4474
DMF	SBPB	Catalyst_solvent	1,2-dimethylbenzene	000095-47-6	52.3283	46.5377	44.9065
DMF	SBPA	Extraction_solvent	3-methyl-2-butanone	000563-80-4	28.8172	40.4332	45.1441
DMF	SBPB	Catalyst_solvent	1,4-dimethylbenzene	000106-42-3	50.6288	46.5427	45.2885
DMF	SBPB	Catalyst_solvent	1,3-dimethylbenzene	000108-38-3	50.7065	46.5324	45.3529
DMF	SBPA	Catalyst_solvent	benzene	000071-43-2	49.5078	40.2918	46.5146
DMF	SBPB	Catalyst_solvent	1-heptene	000592-76-7	44.16	46.692	46.9623
DMF	SBPA	Catalyst_solvent	isoprene	000078-79-5	41.0143	41.2666	48.3823
DMF	SBPB	Catalyst_solvent	n-decane	000124-18-5	42.4881	48.825	48.3929
DMF	SBPB	Catalyst_solvent	n-nonane	000111-84-2	42.4281	48.9256	48.646
DMF	SBPB	Catalyst_solvent	1-hexene	000592-41-6	44.4151	57.6452	50.3637
DMF	SBPA	Extraction_solvent	benzaldehyde	000100-52-7	27.3629	52.6888	50.7651
DMF	SBPA	Extraction_solvent	n-methylaniline	000100-61-8	22.6966	51.189	50.8086
DMF	SBPB	Catalyst_solvent	ethylbenzene	000100-41-4	51.3972	49.8964	50.9382
DMF	SBPB	Catalyst_solvent	n-heptane	000142-82-5	42.3187	49.3103	51.2944
DMF	SBPB	Catalyst_solvent	2,3-dimethylpentane	000565-59-3	42.4653	49.7791	51.9666
DMF	SBPA	Extraction_solvent	3-hydroxytoluene	000108-39-4	17.471	42.2407	52.0978
DMF	SBPB	Catalyst_solvent	1,1-dimethylcyclopentane	001638-26-2	42.7144	53.3125	52.2067
DMF	SBPB	Catalyst_solvent	3-methyl-hexane	000589-34-4	42.351	49.4693	52.4069
DMF	SBPB	Catalyst_solvent	cyclohexane	000110-82-7	42.397	50.0964	53.3156
DMF	SBPA	Extraction_solvent	hexyne	000693-02-7	51.3381	42.6739	53.4348
DMF	SBPB	Catalyst_solvent	hexane	000110-54-3	42.2636	49.618	54.7184
DMF	SBPB	Catalyst_solvent	2-methylpentane	000107-83-5	42.3213	56.6254	55.7512
DMF	SBPA	Extraction_solvent	ethylacetate	000141-78-6	34.0214	36.1896	55.8082
DMF	SBPB	Catalyst_solvent	diisopropylether	000108-20-3	67.0871	58.3055	56.3358
DMF	SBPB	Catalyst_solvent	ccl4	000056-23-5	44.5002	56.0173	56.447
DMF	SBPB	Catalyst_solvent	cyclopentane	000287-92-3	42.4605	50.557	59.8707
DMF	SBPB	Catalyst_solvent	pentane	000109-66-0	42.2039	50.3844	60.4864
DMF	SBPB	Catalyst_solvent	2-methyl-2-butene	000513-35-9	44.4061	63.0701	60.81
DMF	SAPA	Extraction_solvent	2-ethyl-1-hexanol	000104-76-7	63.2687	62.8901	61.7981
DMF	SBPA	Extraction_solvent	aniline	000062-53-3	17.6973	55.1254	62.4599
DMF	SBPA	Extraction_solvent	1-heptyne	000628-71-7	55.7342	67.2345	63.2976
DMF	SBPA	Extraction_solvent	1-hexanol	000111-27-3	36.5354	56.4589	64.879
DMF	SBPA	Extraction_solvent	1-octanol	000111-87-5	37.0922	49.7067	65.1263
DMF	SBPB	Catalyst_solvent	benzene	000071-43-2	60.1874	58.7653	65.2892
DMF	SAPA	Extraction_solvent	1,1,2,2-tetrachloroethane	000079-34-5	44.2887	66.8461	65.7771
DMF	SBPA	Catalyst_solvent	toluene	000108-88-3	44.5146	40.7143	66.9183
DMF	SAPA	Extraction_solvent	n-methylaniline	000100-61-8	49.6735	68.4707	67.0392
DMF	SBPB	Catalyst_solvent	toluene	000108-88-3	54.0266	55.2966	68.3198
DMF	SBPA	Extraction_solvent	2-ethyl-1-hexanol	000104-76-7	36.4746	52.7266	69.7954
DMF	SBPB	Extraction_solvent	n-methylaniline	000100-61-8	52.4736	76.5961	71.8399
DMF	SAPB	Extraction_solvent	aceticacid-2-methylpropylester	000110-19-0	73.1709	76.7013	72.5553
DMF	SBPB	Catalyst_solvent	isoprene	000078-79-5	49.7007	66.8787	74.1629
DMF	SBPA	Extraction_solvent	1,1,2,2-tetrachloroethane	000079-34-5	18.9642	42.4685	76.7183
DMF	SBPA	Extraction_solvent	octyne	000629-05-0	60.0337	69.4383	78.8095
DMF	SAPA	Extraction_solvent	1-heptyne	000628-71-7	77.0734	75.1303	80.1109
DMF	SAPA	Extraction_solvent	benzaldehyde	000100-52-7	89.8013	83.5647	83.3137
DMF	SAPB	Extraction_solvent	benzaldehyde	000100-52-7	64.9223	91.5018	85.6893
DMF	SAPA	Extraction_solvent	1-octanol	000111-87-5	71.8114	65.1658	85.7341
DMF	SAPB	Extraction_solvent	1-octanol	000111-87-5	58.1789	90.3716	86.6311
DMF	SBPA	Extraction_solvent	aceticacid-2-methylpropylester	000110-19-0	35.4015	71.7194	87.033
DMF	SAPB	Extraction_solvent	2-ethyl-1-hexanol	000104-76-7	54.4711	88.4436	89.8387
DMF	SBPB	Extraction_solvent	benzaldehyde	000100-52-7	94.1015	91.0812	90.9517
DMF	SBPB	Extraction_solvent	1-octanol	000111-87-5	84.3151	95.3192	91.0486
DMF	SBPA	Extraction_solvent	n-butylacetate	000123-86-4	35.6326	73.0925	98.6251
DMF	SAPB	Extraction_solvent	n-butylacetate	000123-86-4	72.5657	95.5529	98.6503
DMF	SBPA	Extraction_solvent	isobutanal	000078-84-2	27.1414	61.2735	98.6785
MeF	SBPB	Catalyst_solvent	cycloheptane	000291-64-5	96.0124	91.7629	100.201
MeF	SBPB	Catalyst_solvent	2,3,4-trimethylpentane	000565-75-3	96.5025	108.556	101.519
DMF	SAPA	Extraction_solvent	n-butylacetate	000123-86-4	116.906	111.442	107.973
DMF	SAPB	Extraction_solvent	hexyne	000693-02-7	58.3568	63.2847	115.984
DMF	SAPA	Extraction_solvent	1-hexanol	000111-27-3	79.7526	84.9418	117.184
MeF	SBPB	Catalyst_solvent	cyclohexane	000110-82-7	94.9473	110.56	119.093
DMF	SBPB	Extraction_solvent	2-ethyl-1-hexanol	000104-76-7	80.9903	112.183	120.37
DMF	SBPB	Extraction_solvent	ch2cl2	000075-09-2	104.068	75.4741	121.86
DMF	SBPB	Extraction_solvent	3-methyl-2-butanone	000563-80-4	118.96	127.238	122.029
DMF	SAPB	Extraction_solvent	3-methyl-2-butanone	000563-80-4	96.2946	126.629	123.693
MeF	SBPB	Catalyst_solvent	2,2,4-trimethylhexane	016747-26-5	97.4588	114.26	124.583
MeF	SBPB	Catalyst_solvent	(e)-4-octene	014850-23-8	101.09	95.9042	129.428
DMF	SBPB	Extraction_solvent	n-butylacetate	000123-86-4	101.694	119.577	131.019
MeF	SBPB	Catalyst_solvent	trans-2-octene	013389-42-9	101.545	96.0381	135.247
MeF	SBPB	Catalyst_solvent	n-heptane	000142-82-5	95.3727	139.539	138.929
MeF	SBPB	Catalyst_solvent	n-nonane	000111-84-2	96.6661	110.152	139.163
DMF	SAPA	Extraction_solvent	hexyne	000693-02-7	61.7495	56.7714	141.66
DMF	SAPA	Extraction_solvent	aceticacid-2-methylpropylester	000110-19-0	116.388	122.068	145.336
MeF	SBPB	Catalyst_solvent	octane	000111-65-9	96.0754	108.048	145.388
DMF	SAPA	Extraction_solvent	ch2cl2	000075-09-2	75.7573	71.1363	150.513
DMF	SBPB	Extraction_solvent	isobutanal	000078-84-2	139.585	156.922	152.23
DMF	SAPB	Extraction_solvent	ethylacetate	000141-78-6	146.275	157.303	152.887
DMF	SAPB	Extraction_solvent	ch2cl2	000075-09-2	50.0114	55.7358	185.931
DMF	SAPA	Extraction_solvent	3-hydroxytoluene	000108-39-4	47.1241	109.126	197.942
MeF	SAPB	Extraction_solvent	1,4-dimethylbenzene	000106-42-3	55.4268	119.49	233.518
DMF	SAPA	Extraction_solvent	octyne	000629-05-0	90.4039	87.1041	273.449
MeF	SBPB	Catalyst_solvent	ethylbenzene	000100-41-4	55.3562	170.518	276.36
DMF	SBPB	Extraction_solvent	aceticacid-2-methylpropylester	000110-19-0	101.629	109.144	360.458
DMF	SBPB	Extraction_solvent	triethylamine	000121-44-8	95.2393	104.55	377.797
MeF	SAPB	Extraction_solvent	1,3-dimethylbenzene	000108-38-3	55.4324	94.0192	394.663
DMF	SBPB	Extraction_solvent	hexyne	000693-02-7	235.377	423.493	534.884
MeF	SAPA	Extraction_solvent	1,4-dimethylbenzene	000106-42-3	67.9879	194.829	545.466

## Sheet: All_systems_evaluated_at_level2
SM	PF	Solvent_role	Solvent	CASNumber	E1 [kJ/mol CO]	E2 [kJ/mol CO]
DMF	SBPA	Extraction_solvent	3,5-dimethylpiperidine	035794-11-7	27.7801	23.7194
DMF	SBPA	Extraction_solvent	4-ethyl-2-methylpyridine	000536-88-9	27.2631	23.9722
DMF	SBPA	Extraction_solvent	maleonitrile	000928-53-0	20.9422	24.2394
DMF	SBPA	Extraction_solvent	n-methylcyclohexanamine	000100-60-7	28.1877	24.3746
DMF	SBPA	Extraction_solvent	3,5-xylidine	000108-69-0	9.1058	24.5393
DMF	SBPA	Extraction_solvent	methanesulfonyl-chloride	000124-63-0	12.2215	24.715
DMF	SBPA	Extraction_solvent	n-ethylisopropylamine	019961-27-4	28.8141	24.9366
DEF	SBPA	Extraction_solvent	2,4-dimethyl-4-nonanol	074356-31-3	31.5276	24.9465
DMF	SBPA	Extraction_solvent	3,5-dimethylpyridine	000591-22-0	28.4996	24.9797
DMF	SBPA	Extraction_solvent	1,1'-oxybis-2-ethoxy-ethane	000112-36-7	23.7524	25.0417
DMF	SBPA	Extraction_solvent	octahydroazocine	001121-92-2	28.6966	25.2483
DMF	SBPA	Extraction_solvent	2,4,6-collidine	000108-75-8	27.2673	25.2585
DMF	SBPA	Extraction_solvent	2-methyl-5-ethylpyridine	000104-90-5	27.7266	25.3531
DMF	SBPA	Extraction_solvent	pyridine,2-methyl-5-vinyl	000140-76-1	24.9859	25.4464
DMF	SBPA	Extraction_solvent	3-ethylpyridine	000536-78-7	28.0429	25.6082
DMF	SBPA	Extraction_solvent	1,2-ethanedioldinitrate	000628-96-6	17.2669	25.7514
DMF	SBPA	Extraction_solvent	4-vinylpyridine	000100-43-6	25.2346	26.0912
DMF	SBPA	Extraction_solvent	4-propylpyridine	001122-81-2	27.9947	26.2399
DMF	SBPA	Extraction_solvent	1-chloro-2-butanol	001873-25-2	22.5406	26.4089
DMF	SBPA	Extraction_solvent	2,4-difluoroaniline	000367-25-9	9.1058	26.4729
DMF	SBPA	Extraction_solvent	4-ethylpyridine	000536-75-4	28.1341	26.5451
DMF	SBPA	Extraction_solvent	6-methylheptan-3-ol	018720-66-6	28.9307	26.6373
DMF	SBPA	Extraction_solvent	3-ethyl-2-methyl-3-pentanol	000597-05-7	18.9038	26.7359
DMF	SBPA	Extraction_solvent	2,3-dichloroaniline	000608-27-5	9.1058	26.7667
DMF	SBPA	Extraction_solvent	3-(trifluoromethyl)aniline	000098-16-8	9.1058	26.7763
DMF	SBPA	Extraction_solvent	m-fluoroaniline	000372-19-0	12.9379	26.8214
DMF	SBPA	Extraction_solvent	chloronitromethane	001794-84-9	9.1058	26.9404
DMF	SBPA	Extraction_solvent	2,3-dimethyl-3-pentanol	000595-41-5	28.5686	26.9583
DMF	SBPA	Extraction_solvent	2,5-dimethylpyridine	000589-93-5	27.2817	27.0005
DMF	SBPA	Extraction_solvent	o-fluoroaniline	000348-54-9	9.1058	27.0583
DMF	SBPA	Extraction_solvent	3-ethyl-3-hexanol	000597-76-2	22.4898	27.0915
DMF	SBPA	Extraction_solvent	dibutylamine	000111-92-2	29.0359	27.0959
DMF	SBPA	Extraction_solvent	2,2-dimethyl-3-hexanol	004209-90-9	21.69	27.1007
DMF	SBPA	Extraction_solvent	2,3,4-trimethyl-3-pentanol	003054-92-0	23.9473	27.1448
DMF	SBPA	Extraction_solvent	2,3-dimethylpyridine	000583-61-9	26.514	27.1537
DMF	SBPA	Extraction_solvent	3-chlorobenzeneamine	000108-42-9	9.1058	27.1842
DMF	SBPA	Extraction_solvent	bromonitromethane	000563-70-2	9.1058	27.2038
DMF	SBPA	Extraction_solvent	2,4-dimethyl-3-pentanol	000600-36-2	24.6962	27.278
DMF	SBPA	Extraction_solvent	1,1,2-trichloro-2-fluoroethane	000359-28-4	9.1058	27.3651
DMF	SBPA	Extraction_solvent	n,n-dimethylprop-2-yn-1-amine	007223-38-3	24.2031	27.419
DMF	SBPA	Extraction_solvent	5-nonanol	000623-93-8	28.6211	27.4573
DMF	SBPA	Extraction_solvent	2-methyl-3-heptanol	018720-62-2	27.8962	27.4699
DMF	SBPA	Extraction_solvent	2,6-dimethylpyridine	000108-48-5	27.9729	27.5005
DMF	SBPA	Extraction_solvent	nicotine	000054-11-5	29.5636	27.591
DMF	SBPA	Extraction_solvent	a-ethylbenzylalcohol	000093-54-9	23.607	27.6595
DMF	SBPA	Extraction_solvent	sec-phenethylalcohol	000098-85-1	24.1566	27.7487
DMF	SBPA	Extraction_solvent	n,n'-bis(1,1-dimethylethyl)urea	005336-24-3	13.7476	27.8123
DMF	SBPA	Extraction_solvent	3,6-dimethyl-3-heptanol	001573-28-0	27.554	27.8193
DMF	SBPA	Extraction_solvent	4-ethylaniline	000589-16-2	9.1058	27.8227
DMF	SBPA	Extraction_solvent	oxybischloromethane	000542-88-1	26.4539	27.8381
DMF	SBPA	Extraction_solvent	4-methyl-4-heptanol	000598-01-6	28.7556	27.8415
DMF	SBPA	Extraction_solvent	1,3-dichloro-2-propanol	000096-23-1	17.4406	27.9057
DMF	SBPA	Extraction_solvent	3-pentanol	000584-02-1	30.296	27.9729
DMF	SBPA	Extraction_solvent	3-methyl-4-heptanol	001838-73-9	28.4504	28.0178
DMF	SBPA	Extraction_solvent	3-methoxyaniline	000536-90-3	24.2721	28.0306
DMF	SBPA	Extraction_solvent	2-methyl-benzeneamine	000095-53-4	9.1058	28.079
DMF	SBPA	Extraction_solvent	2-ethylpyridine	000100-71-0	25.7479	28.1564
DMF	SBPA	Extraction_solvent	3-methyoxypyridine	007295-76-3	26.0774	28.169
DMF	SBPA	Extraction_solvent	aniline	000062-53-3	17.6973	28.2042
DMF	SBPA	Extraction_solvent	4-methyl-2-methoxyphenol	000093-51-6	22.0762	28.2109
DMF	SBPA	Extraction_solvent	2-(1-methylethyl)benzenamine	000643-28-7	13.7531	28.2312
DMF	SBPA	Extraction_solvent	3,3-dimethylpiperidine	001193-12-0	28.4479	28.2943
DMF	SBPA	Extraction_solvent	2,2-dimethyl-3-pentanol	003970-62-5	23.725	28.2961
DMF	SBPA	Extraction_solvent	n,4-dimethylaniline	000623-08-5	29.902	28.3376
DMF	SBPA	Extraction_solvent	2-methylpyridine	000109-06-8	27.4107	28.3555
DMF	SBPA	Extraction_solvent	1,5-hexadiyne	000628-16-0	11.9	28.358
DMF	SBPA	Extraction_solvent	benzenepropanol	000122-97-4	28.3866	28.3892
DMF	SBPA	Extraction_solvent	ethylchloroacetate	000105-39-5	26.5875	28.3909
DMF	SBPA	Extraction_solvent	2-methylaminopyridine	004597-87-9	19.0728	28.423
DMF	SBPA	Extraction_solvent	1,6-heptadien-4-ol	002883-45-6	30.706	28.4379
DMF	SBPA	Extraction_solvent	3,6-dimethyl-3-octanol	000151-19-9	29.5141	28.4852
DMF	SBPA	Extraction_solvent	2-n-propylpyridine	000622-39-9	26.5861	28.4898
DMF	SBPA	Extraction_solvent	m-ethylaniline	000587-02-0	9.1058	28.5056
DMF	SBPA	Extraction_solvent	p-isopropylaniline	000099-88-7	9.1058	28.5056
DEF	SBPA	Extraction_solvent	1,5-hexadien-3-ol	000924-41-4	25.6137	28.5078
DMF	SBPA	Extraction_solvent	2-methyl-3-hexanol	000617-29-8	29.5185	28.5981
DMF	SBPA	Extraction_solvent	2,6-xylidine	000087-62-7	16.0163	28.6049
DMF	SBPA	Extraction_solvent	4-methylene-2-oxetanone	000674-82-8	29.5233	28.6049
DMF	SBPA	Extraction_solvent	2,3-xylidine	000087-59-2	9.2526	28.6217
DMF	SBPA	Extraction_solvent	1,6-heptadiyne	002396-63-6	17.9304	28.6319
DMF	SBPA	Extraction_solvent	a-methyl-2-furanmethanol	004208-64-4	27.2891	28.6562
DMF	SBPA	Extraction_solvent	2,3,3,-trimethyl-2-butanol	000594-83-2	27.5044	28.6562
DMF	SBPA	Extraction_solvent	cumene-hydroperoxide	000080-15-9	15.6926	28.7383
DMF	SBPA	Extraction_solvent	p-fluoroaniline	000371-40-4	20.2971	28.7476
DMF	SBPA	Extraction_solvent	2-chloroaniline	000095-51-2	9.1058	28.79
DEF	SBPA	Extraction_solvent	2-chlorophenol	000095-57-8	12.44	28.8318
DMF	SBPA	Extraction_solvent	m-methylbenzylalcohol	000587-03-1	26.7525	28.8569
DMF	SBPA	Extraction_solvent	2,4-dimethylpyrrole	000625-82-1	9.1058	28.9415
DMF	SBPA	Extraction_solvent	o-anisidine	000090-04-0	9.33854	29.0195
DMF	SBPA	Extraction_solvent	3-chloropropyne	000624-65-7	9.1058	29.0652
DMF	SBPA	Extraction_solvent	2-phenoxyethanol	000122-99-6	21.7042	29.073
DMF	SBPA	Extraction_solvent	n,n-dimethyl-1-butanamine	000927-62-8	30.4767	29.1071
DMF	SBPA	Extraction_solvent	4-chloropyridine	000626-61-9	24.4718	29.1677
DEF	SBPA	Extraction_solvent	a-ethylbenzylalcohol	000093-54-9	26.0124	29.1925
DEF	SBPA	Extraction_solvent	2-methyl-pent-3-en-2-ol	063468-05-3	28.67	29.2482
DMF	SBPA	Extraction_solvent	1,1,2,2-tetrachloroethane	000079-34-5	18.9642	29.2584
DEF	SBPA	Extraction_solvent	3,5-xylidine	000108-69-0	28.5872	29.2596
DEF	SBPA	Extraction_solvent	4-methyl-2-methoxyphenol	000093-51-6	27.8729	29.35
DEF	SBPA	Extraction_solvent	1-ethynylcyclohexanol	000078-27-3	12.3097	29.3637
DMF	SBPA	Extraction_solvent	3-chloropyridine	000626-60-8	22.1698	29.4248
DMF	SBPA	Extraction_solvent	3,3-dimethyl-2-butanone	000075-97-8	30.5534	29.4312
DMF	SBPA	Extraction_solvent	p,alpha-dimethylbenzylalcohol	000536-50-5	26.3079	29.4396
DMF	SBPA	Extraction_solvent	sec-butenylglycolether	100524-60-5	29.364	29.4536
DMF	SBPA	Extraction_solvent	chinoline	000091-22-5	23.5612	29.4824
DMF	SBPA	Extraction_solvent	3-methylaniline	000108-44-1	9.1058	29.4832
DMF	SBPA	Extraction_solvent	propyleneglycolmonoallylether	021460-36-6	28.9323	29.4853
DMF	SBPA	Extraction_solvent	methoxypyrazine	003149-28-8	30.5632	29.4991
DMF	SBPA	Extraction_solvent	1,3-dioxol-2-one	000872-36-6	17.2821	29.5156
DMF	SBPA	Extraction_solvent	2-methyl-thiazole	003581-87-1	21.9031	29.5179
DMF	SBPA	Extraction_solvent	crotylglycolether	052458-04-5	28.0829	29.5895
DMF	SBPA	Extraction_solvent	cyclobutylmethylketone	003019-25-8	29.9161	29.5936
DMF	SBPA	Extraction_solvent	1-phenoxy-2-propanol	000770-35-4	21.0789	29.6173
DMF	SBPA	Extraction_solvent	1,4-dichloro-2-butyne	000821-10-3	16.2939	29.6578
DEF	SBPA	Extraction_solvent	tetranitro-methane	000509-14-8	25.4882	29.6695
DMF	SBPA	Extraction_solvent	2-acetothiophene	000088-15-3	29.1028	29.6743
DMF	SBPA	Extraction_solvent	n-propyllactate	000616-09-1	29.2135	29.6919
DMF	SBPA	Extraction_solvent	3-methyl-2-butanone	000563-80-4	28.8172	29.6992
DEF	SBPA	Extraction_solvent	m-ethylaniline	000587-02-0	31.1701	29.7509
DEF	SBPA	Extraction_solvent	1-heptanol	000111-70-6	28.419	29.7567
DMF	SBPA	Extraction_solvent	2,4,5-trimethylthiazole	013623-11-5	27.1889	29.7752
DMF	SBPA	Extraction_solvent	phenyl-hydrazine	000100-63-0	14.5099	29.7916
DEF	SBPA	Extraction_solvent	2-ethyl-1h-pyrrole	001551-06-0	20.7383	29.8051
DEF	SBPA	Extraction_solvent	benzylalcohol	000100-51-6	12.3944	29.8482
DMF	SBPA	Extraction_solvent	5-hexen-2-one	000109-49-9	24.4744	29.8552
DEF	SBPA	Extraction_solvent	2-methyl-3-heptanol	018720-62-2	27.4498	29.8668
DEF	SBPA	Extraction_solvent	1,2-ethanedioldinitrate	000628-96-6	23.1491	29.8679
DEF	SBPA	Extraction_solvent	3-methyl-4-heptanol	001838-73-9	27.7785	29.8804
DEF	SBPA	Extraction_solvent	2-hexanol	000626-93-7	27.0818	29.9025
DMF	SBPA	Extraction_solvent	2-phenylethanol	000060-12-8	27.8422	29.9058
DMF	SBPA	Extraction_solvent	dipropylamine	000142-84-7	19.9831	29.9285
DMF	SBPA	Extraction_solvent	furazan	000288-37-9	22.0527	29.9523
DEF	SBPA	Extraction_solvent	4-ethylaniline	000589-16-2	27.6944	29.9574
DEF	SBPA	Extraction_solvent	methyl-3-mercaptopropionate	002935-90-2	28.4418	29.9609
DEF	SBPA	Extraction_solvent	4-methyl-3-heptanol	014979-39-6	28.0032	29.9761
DMF	SBPA	Extraction_solvent	1,2-dichloro-1-fluoroethane	000430-57-9	15.3283	29.9795
DMF	SBPA	Extraction_solvent	4-methylthiazole	000693-95-8	21.3779	29.9946
DMF	SBPA	Extraction_solvent	3-chloropropanenitrile	000542-76-7	21.1373	30.0123
DMF	SBPA	Extraction_solvent	thiazole	000288-47-1	19.9163	30.0195
DMF	SBPA	Extraction_solvent	2,3-dichloro-1-propanol	000616-23-9	15.1389	30.0368
DEF	SBPA	Extraction_solvent	2,4-dimethylpyrrole	000625-82-1	21.7114	30.0605
DMF	SBPA	Extraction_solvent	carvon	000099-49-0	27.1474	30.1022
DEF	SBPA	Extraction_solvent	2,4-dimethyl-3-pentanol	000600-36-2	24.71	30.1079
DMF	SBPA	Extraction_solvent	4-methylquinoline	000491-35-0	24.6522	30.109
DMF	SBPA	Extraction_solvent	1,1,2-trichloroethane	000079-00-5	20.9711	30.1202
DMF	SBPA	Extraction_solvent	n-methylaniline	000100-61-8	22.6966	30.1216
DMF	SBPA	Extraction_solvent	2-ethyl-1h-pyrrole	001551-06-0	9.1058	30.13
DMF	SBPA	Extraction_solvent	acetophenone	000098-86-2	23.9387	30.1325
DMF	SBPA	Extraction_solvent	2,6-dimethyl-4-heptanol	000108-82-7	27.7185	30.1339
DEF	SBPA	Extraction_solvent	2,5-xylidine	000095-78-3	30.0709	30.1369
DEF	SBPA	Extraction_solvent	1-phenoxy-2-propanol	000770-35-4	24.0505	30.1461
DEF	SBPA	Extraction_solvent	2,2-dimethyl-3-pentanol	003970-62-5	24.9546	30.1504
DMF	SBPA	Extraction_solvent	(z)-2-methyl-2-pentenal	000623-36-9	30.6481	30.1562
DEF	SBPA	Extraction_solvent	2-methyl-benzeneamine	000095-53-4	28.571	30.1754
DMF	SBPA	Extraction_solvent	cis-3-hexen-1-ol	000928-96-1	30.0787	30.1763
DMF	SBPA	Extraction_solvent	1-(2,5-dimethylphenyl)ethanone	002142-73-6	28.6446	30.1812
DEF	SBPA	Extraction_solvent	2,3,4-trimethyl-3-pentanol	003054-92-0	26.3959	30.1892
DEF	SBPA	Extraction_solvent	2,2-dimethyl-3-hexanol	004209-90-9	12.1028	30.1939
DMF	SBPA	Extraction_solvent	n-nitrosodiethylamine	000055-18-5	30.58	30.1975
DMF	SBPA	Extraction_solvent	citral	005392-40-5	28.0687	30.2371
DEF	SBPA	Extraction_solvent	2-chloropyridine	000109-09-1	28.9126	30.2385
DEF	SBPA	Extraction_solvent	1,8-nonadiyne	002396-65-8	24.7899	30.2503
DEF	SBPA	Extraction_solvent	3-methylcyclohexanol	000591-23-1	26.3424	30.2682
DEF	SBPA	Extraction_solvent	cumene-hydroperoxide	000080-15-9	30.6215	30.2701
DMF	SBPA	Extraction_solvent	3,5-dimethylisoxazole	000300-87-8	24.5941	30.2836
DMF	SBPA	Extraction_solvent	n-ethyl-n-hydroxyethanamine	003710-84-7	29.8257	30.3035
DMF	SBPA	Extraction_solvent	4-(2-hydroxyethyl)-chlorbenzol	001875-88-3	22.1321	30.3383
DMF	SBPA	Extraction_solvent	piperitone	000089-81-6	29.9091	30.3471
DEF	SBPA	Extraction_solvent	3-ethyl-3-hexanol	000597-76-2	24.1996	30.3494
DMF	SBPA	Extraction_solvent	o-methoxybenzylalcohol	000612-16-8	26.8581	30.3555
DMF	SBPA	Extraction_solvent	3-bromopyridine	000626-55-1	21.5264	30.3644
DMF	SBPA	Extraction_solvent	chloroacetylchloride	000079-04-9	13.9699	30.3654
DEF	SBPA	Extraction_solvent	2-(1-methylethyl)benzenamine	000643-28-7	30.2178	30.3802
DEF	SBPA	Extraction_solvent	1,1,2-trichloroethane	000079-00-5	22.9505	30.3935
DEF	SBPA	Extraction_solvent	n-propylbutyrate	000105-66-8	32.0459	30.4054
DMF	SBPA	Extraction_solvent	benzylalcohol	000100-51-6	28.3946	30.4301
DMF	SBPA	Extraction_solvent	((1,1-dimethylethoxy)methyl)oxirane	007665-72-7	29.7631	30.4446
DMF	SBPA	Extraction_solvent	gamma-heptalactone	000105-21-5	28.2093	30.449
DMF	SBPA	Extraction_solvent	di-tert-butylsulfone	001886-75-5	29.8469	30.449
DEF	SBPA	Extraction_solvent	3-ethyl-2-methyl-3-pentanol	000597-05-7	13.418	30.4528
DEF	SBPA	Extraction_solvent	3-ethyl-2,4-dimethyl-1h-pyrrole	000517-22-6	22.7725	30.4586
DMF	SBPA	Extraction_solvent	cyanoaceticacidethylester	000105-56-6	29.787	30.5086
DEF	SBPA	Extraction_solvent	3-(trifluoromethyl)aniline	000098-16-8	12.6564	30.512
DMF	SBPA	Extraction_solvent	1,1-ethanedioldiacetate	000542-10-9	27.2785	30.5272
DMF	SBPA	Extraction_solvent	ethyl2-propynoate	000623-47-2	22.5053	30.5385
DMF	SBPA	Extraction_solvent	4-ethoxybenzeneamine	000156-43-4	9.53102	30.5499
DEF	SBPA	Extraction_solvent	2-ethoxyaniline	000094-70-2	30.7963	30.5538
DEF	SBPA	Extraction_solvent	chloroacetylchloride	000079-04-9	12.1028	30.5604
DMF	SBPA	Extraction_solvent	2-pentanone	000107-87-9	29.4088	30.5914
DMF	SBPA	Extraction_solvent	4-methyl-2-hexanone	000105-42-0	29.4657	30.5993
DEF	SBPA	Extraction_solvent	1,1,2-trichloro-2-fluoroethane	000359-28-4	31.3248	30.6279
DMF	SBPA	Extraction_solvent	2-methoxy-1-phenylethanone	004079-52-1	28.1263	30.6405
DMF	SBPA	Extraction_solvent	dimethylmaleate	000624-48-6	29.8761	30.6448
DEF	SBPA	Extraction_solvent	ethylchloroacetate	000105-39-5	31.1156	30.6507
DMF	SBPA	Extraction_solvent	2-methylbenzaldehyde	000529-20-4	26.39	30.6811
DMF	SBPA	Extraction_solvent	m-methylacetophenone	000585-74-0	25.5984	30.7046
DEF	SBPA	Extraction_solvent	methylpropanedioicaciddimethylester	000609-02-9	31.7596	30.7102
DEF	SBPA	Extraction_solvent	indoline	000496-15-1	28.5558	30.7215
DMF	SBPA	Extraction_solvent	1-methoxy-2-acetoxypropane	000108-65-6	27.6573	30.7231
DEF	SBPA	Extraction_solvent	n,4-dimethylaniline	000623-08-5	24.3464	30.7285
DMF	SBPA	Extraction_solvent	acetylcyclohexanone	000823-76-7	29.6501	30.7316
DMF	SBPA	Extraction_solvent	6-methylquinoline	000091-62-3	24.4326	30.7402
DEF	SBPA	Extraction_solvent	formicacidpentylester	000638-49-3	27.4606	30.8235
DMF	SBPA	Extraction_solvent	diethylcyanamide	000617-83-4	29.0585	30.8401
DMF	SBPA	Extraction_solvent	n-ethyl-n-butylamine	013360-63-9	29.8289	30.8401
DEF	SBPA	Extraction_solvent	1,5-hexadiyne	000628-16-0	17.8262	30.8441
DEF	SBPA	Extraction_solvent	di-2-furylmethane	001197-40-6	31.1929	30.8468
DMF	SBPA	Extraction_solvent	1-methylisoquinoline	001721-93-3	23.6858	30.8499
DMF	SBPA	Extraction_solvent	2,4,4-trimethylcyclohexanone	002230-70-8	30.295	30.8602
DMF	SBPA	Extraction_solvent	ethylethylcarbamate	000623-78-9	29.4911	30.8625
DEF	SBPA	Extraction_solvent	2-ethylbenzeneamine	000578-54-1	23.5167	30.8627
DEF	SBPA	Extraction_solvent	3,6-dimethyl-3-octanol	000151-19-9	29.5847	30.8656
DMF	SBPA	Extraction_solvent	1h,8h-hexadecafluorooctane	000307-99-3	18.4277	30.8679
DEF	SBPA	Extraction_solvent	1,1,2,2-tetrachloroethane	000079-34-5	20.9471	30.8713
DMF	SBPA	Extraction_solvent	4-hexen-3-one	002497-21-4	27.6526	30.8829
DMF	SBPA	Extraction_solvent	dimethyl-p-isopropyl-benzylalcohol	003445-42-9	18.1932	30.8947
DMF	SBPA	Extraction_solvent	n,n-dimethylprop-2-en-1-amine	002155-94-4	25.0961	30.895
DMF	SBPA	Extraction_solvent	n-nitroso-diisobutylamine	000997-95-5	28.1236	30.9155
DMF	SBPA	Extraction_solvent	1-phenyl-2-propanone	000103-79-7	25.8269	30.922
DMF	SBPA	Extraction_solvent	4-fluorobenzaldehyde	000459-57-4	26.3986	30.9252
DMF	SBPA	Extraction_solvent	1,5-hexadien-3-ol	000924-41-4	27.6014	30.9252
DEF	SBPA	Extraction_solvent	n,n-diprop-2-yn-1-ylprop-2-yn-1-amine	006921-29-5	28.2193	30.9485
DMF	SBPA	Extraction_solvent	2-methyl-propanenitrile	000078-82-0	27.9803	30.9587
DEF	SBPA	Extraction_solvent	2-(trifluoromethyl)benzenamine	000088-17-5	13.1465	30.9713
DMF	SBPA	Extraction_solvent	dimethylsuccinate	000106-65-0	29.0123	30.9845
DEF	SBPA	Extraction_solvent	1,3-hexadien-5-yne	010420-90-3	12.829	30.9933
DEF	SBPA	Extraction_solvent	2,3-xylidine	000087-59-2	29.1637	31.0006
DMF	SBPA	Extraction_solvent	2'-aminoacetophenone	000551-93-9	14.0132	31.01
DEF	SBPA	Extraction_solvent	n-allylaniline	000589-09-3	19.2398	31.0276
DMF	SBPA	Extraction_solvent	dimethylcarbamoylchloride	000079-44-7	29.2479	31.0358
DMF	SBPA	Extraction_solvent	2,4-hexanedione	003002-24-2	24.9501	31.0509
DMF	SBPA	Extraction_solvent	isopropylformate	000625-55-8	27.9253	31.0524
DEF	SBPA	Extraction_solvent	1-methyl-1-phenylhydrazine	000618-40-6	22.5851	31.077
DMF	SBPA	Extraction_solvent	3,3,5-trimethylcyclohexanone	000873-94-9	30.2285	31.0821
DEF	SBPA	Extraction_solvent	2-chloroaniline	000095-51-2	24.1946	31.0825
DMF	SBPA	Extraction_solvent	2-ethoxyethanolacetate	000111-15-9	28.6849	31.0915
DEF	SBPA	Extraction_solvent	p-menthan-hydroperoxid	000080-47-7	29.6861	31.1133
DEF	SBPA	Extraction_solvent	isononylalcohol	003452-97-9	29.5954	31.1203
DMF	SBPA	Extraction_solvent	n-propylformate	000110-74-7	29.6546	31.1339
DMF	SBPA	Extraction_solvent	1,2-propyleneglycoldiacetate	000623-84-7	26.6163	31.1423
DMF	SBPA	Extraction_solvent	3-cyclohexene-1-carboxaldehyde	000100-50-5	30.341	31.1501
DEF	SBPA	Extraction_solvent	3-ethyl-1-heptanol	003525-25-5	30.7154	31.1584
DMF	SBPA	Extraction_solvent	pivalonitrile	000630-18-2	29.3865	31.1812
DMF	SBPA	Extraction_solvent	bromoaceticacidmethylester	000096-32-2	26.7297	31.1854
DEF	SBPA	Extraction_solvent	(ethoxymethyl)-benzene	000539-30-0	30.9692	31.2135
DMF	SBPA	Extraction_solvent	p-tolylpropadienylsulfone	016192-08-8	24.8092	31.2292
DMF	SBPA	Extraction_solvent	dihydrothiophen-2(3h)-one	001003-10-7	30.4229	31.2292
DMF	SBPA	Extraction_solvent	1-(2-methylphenyl)ethanone	000577-16-2	28.1949	31.2396
DMF	SBPA	Extraction_solvent	sec-butylacetate	000105-46-4	30.6984	31.2673
DMF	SBPA	Extraction_solvent	3-methyl-2-pentanone	000565-61-7	29.5574	31.2811
DEF	SBPA	Extraction_solvent	propiolonitrile	001070-71-9	24.578	31.2817
DMF	SBPA	Extraction_solvent	1-(3-fluorophenyl)ethanone	000455-36-7	26.2244	31.2945
DEF	SBPA	Extraction_solvent	methyldichloroacetate	000116-54-1	23.4389	31.2982
DEF	SBPA	Extraction_solvent	4-decanol	002051-31-2	30.9825	31.31
DMF	SBPA	Extraction_solvent	n-propylacetate	000109-60-4	30.4566	31.3135
DEF	SBPA	Extraction_solvent	n-methylaniline	000100-61-8	24.8209	31.3838
DEF	SBPA	Extraction_solvent	dichloroacetaldehyde	000079-02-7	12.1028	31.3846
DEF	SBPA	Extraction_solvent	dichloroacetylchloride	000079-36-7	17.3431	31.4191
DEF	SBPA	Extraction_solvent	2-methyl-1-undecanol	010522-26-6	32.126	31.4251
DMF	SBPA	Extraction_solvent	3-methoxypropanenitrile	000110-67-8	24.8789	31.4352
DEF	SBPA	Extraction_solvent	n-ethylaniline	000103-69-5	26.2118	31.4435
DMF	SBPA	Extraction_solvent	6-methyl-5-hepten-2-one	000110-93-0	29.9271	31.4464
DMF	SBPA	Extraction_solvent	1,2,3-propanetrioltrinitrate	000055-63-0	14.3018	31.453
DEF	SBPA	Extraction_solvent	a-methyl-2-furanmethanol	004208-64-4	30.4522	31.4554
DMF	SBPA	Extraction_solvent	3-methoxybenzaldehyde	000591-31-1	27.1636	31.4653
DMF	SBPA	Extraction_solvent	3-oxobutanoicacid-2-propenylester	001118-84-9	29.349	31.4689
DMF	SBPA	Extraction_solvent	1,3-propanedioldiacetate	000628-66-0	28.8918	31.4896
DMF	SBPA	Extraction_solvent	chcl3	000067-66-3	20.717	31.5071
DEF	SBPA	Extraction_solvent	m-methylbenzylalcohol	000587-03-1	31.9991	31.524
DMF	SBPA	Extraction_solvent	chloroacetone	000078-95-5	20.2073	31.5331
DMF	SBPA	Extraction_solvent	diethylmalonate	000105-53-3	27.5719	31.5355
DMF	SBPA	Extraction_solvent	aceticacid-2-propenylester	000591-87-7	26.413	31.5807
DEF	SBPA	Extraction_solvent	ethanesulfonylchloride	000594-44-5	25.1091	31.5835
DEF	SBPA	Extraction_solvent	p,alpha-dimethylbenzylalcohol	000536-50-5	30.8108	31.5929
DEF	SBPA	Extraction_solvent	2,3-dichloroaniline	000608-27-5	12.8941	31.6008
DEF	SBPA	Extraction_solvent	bromonitromethane	000563-70-2	24.4591	31.6082
DMF	SBPA	Extraction_solvent	4-ethylacetophenone	000937-30-4	29.2786	31.6108
DEF	SBPA	Extraction_solvent	2,6-xylidine	000087-62-7	12.4926	31.6175
DMF	SBPA	Extraction_solvent	3-furfural	000498-60-2	28.1816	31.6218
DEF	SBPA	Extraction_solvent	1,6-heptadiyne	002396-63-6	21.5435	31.6527
DMF	SBPA	Extraction_solvent	phthalan	000496-14-0	29.0563	31.663
DMF	SBPA	Extraction_solvent	4-methyl-3,6-dihydro-2h-pyran	016302-35-5	29.4208	31.6706
DMF	SBPA	Extraction_solvent	2-(alpha-methylbenzyloxy)-1-propanol	857237-25-3	25.6407	31.6858
DEF	SBPA	Extraction_solvent	5-hexenol	000821-41-0	30.1247	31.6976
DMF	SBPA	Extraction_solvent	1,1-difluoro-1,2,2-trichloroethane	000354-21-2	16.9297	31.7033
DEF	SBPA	Extraction_solvent	1,1-dichloroacetone	000513-88-2	24.0548	31.7218
DMF	SBPA	Extraction_solvent	2-methyl-3-butyn-2-ol	000115-19-5	28.9234	31.7335
DEF	SBPA	Extraction_solvent	methoxyacetylchloride	038870-89-2	24.9448	31.7433
DEF	SBPA	Extraction_solvent	3-methyl-3-pentanol	000077-74-7	32.3167	31.7673
DEF	SBPA	Extraction_solvent	2,3,4,5,6-pentafluoroaniline	000771-60-8	12.2027	31.7694
DEF	SBPA	Extraction_solvent	1,2,3-propanetrioltrinitrate	000055-63-0	28.1372	31.7697
DMF	SBPA	Extraction_solvent	ethylcrotonate	010544-63-5	28.3103	31.7886
DEF	SBPA	Extraction_solvent	diethylcarbonate	000105-58-8	27.7654	31.8095
DEF	SBPA	Extraction_solvent	1,1-difluoro-1,2,2-trichloroethane	000354-21-2	25.067	31.81
DEF	SBPA	Extraction_solvent	diethylaluminumchloride	000096-10-6	24.7267	31.8538
DMF	SBPA	Extraction_solvent	p-methoxybenzylalcohol	000105-13-5	27.1991	31.8588
DEF	SBPA	Extraction_solvent	7-oxabicyclo[4,1,0]heptane	000286-20-4	29.9127	31.8661
DEF	SBPA	Extraction_solvent	1-penten-3-ol	000616-25-1	32.1679	31.8691
DEF	SBPA	Extraction_solvent	ethyloxalat	000095-92-1	31.8874	31.8741
DEF	SBPA	Extraction_solvent	2-hydroxyethylcyclopentane	000766-00-7	29.8576	31.8757
DEF	SBPA	Extraction_solvent	isonitrobutane	000625-74-1	26.2377	31.9144
DMF	SBPA	Extraction_solvent	3-methylquinoline	000612-58-8	23.8964	31.9151
DMF	SBPA	Extraction_solvent	a,a-dimethylbenzenepropanol	000103-05-9	24.6841	31.9155
DEF	SBPA	Extraction_solvent	2-butoxyethanol	000111-76-2	31.8023	31.9171
DEF	SBPA	Extraction_solvent	isopropylchloroacetate	000105-48-6	29.5145	31.9237
DMF	SBPA	Extraction_solvent	3-butenenitrile	000109-75-1	28.7611	31.9313
DMF	SBPA	Extraction_solvent	2-chloroethanolacetate	000542-58-5	29.0868	31.9545
DMF	SBPA	Extraction_solvent	beta-cyanopropiophenone	005343-98-6	23.8783	31.9828
DMF	SBPA	Extraction_solvent	1,2,3,4-tetrahydro-2-naphthalenol	000530-91-6	26.0191	32
DEF	SBPA	Extraction_solvent	n-butylaniline	001126-78-9	30.021	32.0009
DEF	SBPA	Extraction_solvent	4-penten-1-ol	000821-09-0	31.0669	32.003
DEF	SBPA	Extraction_solvent	4-methylene-2-oxetanone	000674-82-8	26.4016	32.03
DMF	SBPA	Extraction_solvent	2-furanmethanolacetate	000623-17-6	26.1726	32.0498
DMF	SBPA	Extraction_solvent	n,2-dimethylpropan-2-amine	014610-37-8	23.0936	32.0567
DMF	SBPA	Extraction_solvent	cyclohex-3-enone	004096-34-8	29.2426	32.0567
DMF	SBPA	Extraction_solvent	2-methyl-3-oxobutanoicacidethylester	000609-14-3	26.8849	32.0855
DEF	SBPA	Extraction_solvent	3-chlorobenzoylchloride	000618-46-2	30.1711	32.0856
DMF	SBPA	Extraction_solvent	p-isopropylacetophenone	000645-13-6	28.268	32.0925
DEF	SBPA	Extraction_solvent	1-nitrobutane	000627-05-4	26.2492	32.1009
DEF	SBPA	Extraction_solvent	3-octanol	000589-98-0	29.756	32.1038
DEF	SBPA	Extraction_solvent	crotylglycolether	052458-04-5	30.6849	32.1115
DEF	SBPA	Extraction_solvent	4-methyl-1-pentanol	000626-89-1	30.0361	32.1453
DEF	SBPA	Extraction_solvent	tert-amylacetate	000625-16-1	30.8053	32.1455
DMF	SBPA	Extraction_solvent	ethylacetoacetate	000141-97-9	30.6394	32.1655
DMF	SBPA	Extraction_solvent	propylene-glycol-alpha-methylbenzyl-ether	871518-84-2	27.5207	32.1657
DEF	SBPA	Extraction_solvent	3,6-dioxaoctane	000629-14-1	29.9592	32.1688
DEF	SBPA	Extraction_solvent	2-ethyl-2-hexenal	000645-62-5	31.9584	32.1696
DMF	SBPA	Extraction_solvent	benzothiazole	000095-16-9	23.5529	32.174
DEF	SBPA	Extraction_solvent	2,3-dimethyl-3-pentanol	000595-41-5	31.4484	32.2016
DMF	SBPA	Extraction_solvent	1,3-hexadien-5-yne	010420-90-3	29.2216	32.2038
DEF	SBPA	Extraction_solvent	3-hexanol	000623-37-0	30.45	32.2038
DMF	SBPA	Extraction_solvent	butyronitrile	000109-74-0	28.7014	32.2343
DEF	SBPA	Extraction_solvent	3,3-dimethyl-1-butanol	000624-95-3	31.7086	32.2432
DEF	SBPA	Extraction_solvent	5-methyl1-hexanol	000627-98-5	30.0513	32.247
DMF	SBPA	Extraction_solvent	chloroaceticacidmethylester	000096-34-4	30.0524	32.2622
DEF	SBPA	Extraction_solvent	2-methylbenzaldehyde	000529-20-4	31.7367	32.2758
DMF	SBPA	Extraction_solvent	2-bromoethanolacetate	000927-68-4	27.4103	32.2766
DEF	SBPA	Extraction_solvent	cis-4-methylcyclohexanol	007731-28-4	30.6526	32.2805
DEF	SBPA	Extraction_solvent	cis-3-hexen-1-ol	000928-96-1	30.835	32.3004
DEF	SBPA	Extraction_solvent	4-ethoxybenzeneamine	000156-43-4	31.245	32.3062
DEF	SBPA	Extraction_solvent	4-hydroxy-3-methoxybenzaldehyde	000121-33-5	12.3866	32.3118
DEF	SBPA	Extraction_solvent	1,2-ethanedithiol	000540-63-6	23.3497	32.313
DEF	SBPA	Extraction_solvent	propanesulfonylchloride	010147-36-1	26.5267	32.3131
DEF	SBPA	Extraction_solvent	3-methylaniline	000108-44-1	29.9411	32.3283
DEF	SBPA	Extraction_solvent	1,2,3-trichloropropane	000096-18-4	22.5531	32.3298
DEF	SBPA	Extraction_solvent	3-methyl-2-heptanone	002371-19-9	32.072	32.3433
DEF	SBPA	Extraction_solvent	m-dimethoxybenzene	000151-10-0	32.2059	32.3464
DEF	SBPA	Extraction_solvent	a-nitrotoluene	000622-42-4	30.0239	32.3478
DEF	SBPA	Extraction_solvent	aniline	000062-53-3	30.7054	32.3598
DEF	SBPA	Extraction_solvent	5-methyl-4-hepten-3-one	001447-26-3	31.7827	32.3614
DMF	SBPA	Extraction_solvent	3-thiophenecarboxaldehyde	000498-62-4	27.5392	32.3628
DEF	SBPA	Extraction_solvent	2-methyl-2-hexanol	000625-23-0	30.9934	32.3635
DEF	SBPA	Extraction_solvent	n-propylaniline	000622-80-0	28.2891	32.366
DEF	SBPA	Extraction_solvent	pinacolylalcohol	000464-07-3	30.1562	32.3695
DEF	SBPA	Extraction_solvent	3,4-xylylamine	000095-64-7	12.4806	32.3737
DMF	SBPA	Extraction_solvent	pentanedioicaciddimethylester	001119-40-0	26.9105	32.3825
DEF	SBPA	Extraction_solvent	butanoicacid-4-chloro-methylester	003153-37-5	27.9724	32.3835
DMF	SBPA	Extraction_solvent	cyanoaceticacidmethylester	000105-34-0	27.0509	32.3877
DEF	SBPA	Extraction_solvent	methylmethacrylate	000080-62-6	26.6214	32.3903
DMF	SBPA	Catalyst_solvent	hexacyclopropylethane	026902-55-6	38.2464	32.3905
DEF	SBPA	Extraction_solvent	chcl3	000067-66-3	12.1028	32.3952
DEF	SBPA	Extraction_solvent	n-(phenylmethylene)methanamine	000622-29-7	29.8229	32.397
DMF	SBPA	Extraction_solvent	1,2-ethanedithiol	000540-63-6	28.8286	32.3972
DEF	SBPA	Extraction_solvent	heptane-3,5-dione	007424-54-6	30.9859	32.4234
DEF	SBPA	Extraction_solvent	cis-2-methylcyclohexanol	007443-70-1	27.8731	32.429
DEF	SBPA	Extraction_solvent	4-heptanol	000589-55-9	28.2296	32.4476
DEF	SBPA	Extraction_solvent	paraldehyde	000123-63-7	31.9257	32.4485
DEF	SBPA	Extraction_solvent	cyclohexanemethanol	000100-49-2	29.0354	32.45
DEF	SBPA	Extraction_solvent	(2-propenyloxy)methyl-oxirane	000106-92-3	31.86	32.4516
DEF	SBPA	Extraction_solvent	4-methyl-1-penten-3-ol	004798-45-2	24.9827	32.4587
DEF	SBPA	Extraction_solvent	2-methyl-2-octanol	000628-44-4	13.5528	32.4667
DEF	SBPA	Extraction_solvent	2,3-dichloro-1-propanol	000616-23-9	30.9969	32.4709
DEF	SBPA	Extraction_solvent	nitrobenzene	000098-95-3	28.8662	32.4869
DEF	SBPA	Extraction_solvent	1,1-diallylethanol	025201-40-5	28.1663	32.4975
DEF	SBPA	Extraction_solvent	peroxyaceticacid	000079-21-0	31.4331	32.4976
DEF	SBPA	Extraction_solvent	chloroaceticacidbutylester	000590-02-3	31.0167	32.51
DEF	SBPA	Extraction_solvent	2-methyl-2-pentanol	000565-67-3	30.3358	32.512
DEF	SBPA	Extraction_solvent	2-nitropropane	000079-46-9	27.4525	32.516
DEF	SBPA	Extraction_solvent	2-methylaminopyridine	004597-87-9	31.558	32.5161
DEF	SBPA	Extraction_solvent	2-methyl-1-butanolacetate	000624-41-9	30.8809	32.5173
DEF	SBPA	Extraction_solvent	1-bromo-2-ethoxyethane	000592-55-2	26.6881	32.5178
DEF	SBPA	Extraction_solvent	1-octanol	000111-87-5	28.5332	32.5182
DEF	SBPA	Extraction_solvent	2-heptanone	000110-43-0	31.7883	32.5225
DMF	SBPA	Extraction_solvent	4-chlorobutanenitrile	000628-20-6	29.8776	32.527
DEF	SBPA	Extraction_solvent	2,3-dimethyl-2-butanol	000594-60-5	13.8228	32.5319
DEF	SBPA	Extraction_solvent	2-methyl-3-hexanol	000617-29-8	26.3167	32.5348
DEF	SBPA	Extraction_solvent	4-methyl-2-pentylacetate	000108-84-9	32.0302	32.5373
DEF	SBPA	Extraction_solvent	2-methyl-1-pentanol	000105-30-6	25.0291	32.5523
DEF	SBPA	Extraction_solvent	benzylformate	000104-57-4	31.6917	32.5726
DMF	SBPA	Extraction_solvent	2-methyl-quinoline	000091-63-4	9.1058	32.5753
DEF	SBPA	Extraction_solvent	4-methyl-4-heptanol	000598-01-6	27.49	32.5785
DEF	SBPA	Extraction_solvent	3-nitrotoluene	000099-08-1	30.7322	32.5847
DEF	SBPA	Extraction_solvent	5-methyl-2-hexanone	000110-12-3	31.5559	32.5884
DEF	SBPA	Extraction_solvent	3-methyl-2-pentanol	000565-60-6	28.1309	32.5931
DEF	SBPA	Extraction_solvent	4-(2-hydroxyethyl)-chlorbenzol	001875-88-3	28.6438	32.5939
DEF	SBPA	Extraction_solvent	octan-4-ol	000589-62-8	29.3184	32.5942
DEF	SBPA	Extraction_solvent	o-aminobenzoicacidethylester	000087-25-2	30.0179	32.6068
DEF	SBPA	Extraction_solvent	ethyldichloroacetate	000535-15-9	25	32.6255
DEF	SBPA	Extraction_solvent	2-hexene-4-ol	004798-58-7	24.0218	32.6259
DEF	SBPA	Extraction_solvent	4-methylcyclohexanol	000589-91-3	31.1556	32.6375
DEF	SBPA	Extraction_solvent	3-methyl-1-pentanol	000589-35-5	29.1315	32.6527
DMF	SBPA	Extraction_solvent	methylpropionate	000554-12-1	28.009	32.6528
DEF	SBPA	Extraction_solvent	2-ethylbutyraldehyde	000097-96-1	27.9555	32.6675
DEF	SBPA	Extraction_solvent	2-nitrotoluene	000088-72-2	29.6422	32.6678
DEF	SBPA	Extraction_solvent	2-vinylpyridine	000100-69-6	27.9548	32.6735
DEF	SBPA	Extraction_solvent	3,6-dimethyl-3-heptanol	001573-28-0	27.1781	32.6923
DMF	SBPA	Extraction_solvent	3,4-dihydro-1(2h)-naphthalenone	000529-34-0	26.0194	32.6953
DEF	SBPA	Extraction_solvent	n-pentylacetate	000628-63-7	31.0387	32.7012
DMF	SBPA	Extraction_solvent	chcl2br	000075-27-4	19.973	32.704
DEF	SBPA	Extraction_solvent	1-nitropropane	000108-03-2	26.383	32.7097
DEF	SBPA	Extraction_solvent	bromoaceticacidethylester	000105-36-2	28.194	32.723
DEF	SBPA	Extraction_solvent	1-nitropentane	000628-05-7	26.276	32.7271
DEF	SBPA	Extraction_solvent	2'-aminoacetophenone	000551-93-9	32.1386	32.7476
DEF	SBPA	Extraction_solvent	trans-1,3-dichloropropene	010061-02-6	23.8172	32.7492
DEF	SBPA	Extraction_solvent	methyltiglate	006622-76-0	27.4104	32.7538
DEF	SBPA	Extraction_solvent	2-methyl-2-penten-1-ol	001610-29-3	23.379	32.7585
DEF	SBPA	Extraction_solvent	m-fluoroaniline	000372-19-0	31.3191	32.7632
DEF	SBPA	Extraction_solvent	2-nitrobutane	000600-24-8	29.671	32.7649
DMF	SBPA	Extraction_solvent	2-chloro-2,5-cyclohexadiene-1,4-dione	000695-99-8	28.9401	32.7686
DEF	SBPA	Extraction_solvent	2,2-dimethyl-1-butanol	001185-33-7	15.3825	32.7688
DEF	SBPA	Extraction_solvent	p-methoxybenzylalcohol	000105-13-5	12.1028	32.771
DEF	SBPA	Extraction_solvent	4-methyl-2-pentanol	000108-11-2	26.9374	32.7751
DEF	SBPA	Extraction_solvent	diethylsulfate	000064-67-5	30.814	32.7845
DEF	SBPA	Extraction_solvent	3-thiocyanato-propene	000764-49-8	30.5074	32.7859
DEF	SBPA	Extraction_solvent	tert-butylformate	000762-75-4	26.9031	32.793
DEF	SBPA	Extraction_solvent	formicacid-1-methylpropylester	000589-40-2	26.6235	32.7932
DEF	SBPA	Extraction_solvent	2,2-dichloroethanol	000598-38-9	12.3816	32.7992
DEF	SBPA	Extraction_solvent	3-fluorobenzoylchloride	001711-07-5	27.9314	32.8068
DMF	SBPA	Extraction_solvent	gamma-nonalactone	000104-61-0	27.4249	32.822
DEF	SBPA	Extraction_solvent	propanoicacidethenylester	000105-38-4	29.7764	32.829
DEF	SBPA	Extraction_solvent	2-methyl-pentanal	000123-15-9	27.9493	32.8321
DEF	SBPA	Extraction_solvent	oxybischloromethane	000542-88-1	27.0488	32.8332
DEF	SBPA	Extraction_solvent	cycloheptanol	000502-41-0	29.0299	32.8465
DMF	SBPA	Extraction_solvent	trimethoxymethane	000149-73-5	29.5729	32.85
DEF	SBPA	Extraction_solvent	phenylformate	001864-94-4	27.3257	32.8645
DEF	SBPA	Extraction_solvent	1-chloro-2,2,2-trifluoroethyldifluoromethylether	026675-46-7	12.3446	32.8679
DEF	SBPA	Extraction_solvent	3-pentanol	000584-02-1	23.5931	32.8685
DEF	SBPA	Extraction_solvent	methyl-trans-2-butenoate	000623-43-8	27.1828	32.8738
DEF	SBPA	Extraction_solvent	ethylmethacrylate	000097-63-2	27.9345	32.8826
DEF	SBPA	Extraction_solvent	ethylcrotonate	010544-63-5	31.0065	32.9179
DEF	SBPA	Extraction_solvent	6-methylheptan-3-ol	018720-66-6	26.8257	32.9189
DEF	SBPA	Extraction_solvent	thiophenol	000108-98-5	23.6988	32.9238
DEF	SBPA	Extraction_solvent	n,n-dimethylprop-2-yn-1-amine	007223-38-3	22.2339	32.9299
DEF	SBPA	Extraction_solvent	5-nonanol	000623-93-8	27.8421	32.9347
DEF	SBPA	Extraction_solvent	1-hexanol	000111-27-3	28.3374	32.941
DEF	SBPA	Extraction_solvent	1,1-dichloro-2,2-difluoroethylmethylether	000076-38-0	20.6451	32.9467
DEF	SBPA	Extraction_solvent	2,6-dimethyl-4-heptanol	000108-82-7	26.6025	32.9484
DEF	SBPA	Extraction_solvent	2-heptanol	000543-49-7	27.4324	32.9491
DMF	SBPA	Extraction_solvent	2-ethyl-1,3-dioxolane	002568-96-9	29.5758	32.9578
DEF	SBPA	Extraction_solvent	2-ethyl-1,3-dioxolane	002568-96-9	31.9319	32.9583
DMF	SBPA	Extraction_solvent	benzylamine	000100-46-9	20.5769	32.9718
DEF	SBPA	Extraction_solvent	1-chloro-2-butanol	001873-25-2	22.1765	32.9734
DEF	SBPA	Extraction_solvent	isoamylacetate	000123-92-2	30.2122	32.9759
DEF	SBPA	Extraction_solvent	2-methyl-1-butanol	000137-32-6	27.97	32.9815
DMF	SBPA	Extraction_solvent	o-aminobenzoicacidethylester	000087-25-2	19.3042	32.9917
DMF	SBPA	Extraction_solvent	4-methyl-2-pentanone	000108-10-1	28.0257	32.996
DEF	SBPA	Extraction_solvent	1-decyne	000764-93-2	25.7336	32.9974
DMF	SBPA	Extraction_solvent	5-phenylpentanol	010521-91-2	28.5147	33.022
DEF	SBPA	Extraction_solvent	allylacrylate	000999-55-3	26.6511	33.0302
DEF	SBPA	Extraction_solvent	methanesulfonyl-chloride	000124-63-0	29.2658	33.0377
DEF	SBPA	Extraction_solvent	1-chloro-4-fluorobenzene	000352-33-0	24.4945	33.0412
DEF	SBPA	Extraction_solvent	3-pentanone	000096-22-0	27.6821	33.0423
DEF	SBPA	Extraction_solvent	sec-butylacetate	000105-46-4	30.9875	33.0433
DEF	SBPA	Extraction_solvent	3-methyl-3-penten-1-yne	001574-33-0	21.3609	33.046
DEF	SBPA	Extraction_solvent	n-ethyl-n-hydroxyethanamine	003710-84-7	24.1063	33.0517
DEF	SBPA	Extraction_solvent	6-oxabicyclo[3,1,0]hexane	000285-67-6	30.3984	33.0518
DEF	SBPA	Extraction_solvent	heptanal	000111-71-7	29.0558	33.0562
DEF	SBPA	Extraction_solvent	2,4-dimethyl-2-pentanol	000625-06-9	12.4534	33.0705
DEF	SBPA	Extraction_solvent	1-hexen-3-ol	004798-44-1	27.6871	33.071
DEF	SBPA	Extraction_solvent	bis(2-chloroethyl)ether	000111-44-4	28.875	33.0841
DEF	SBPA	Extraction_solvent	propanoicacidphenylester	000637-27-4	31.6829	33.0906
DEF	SBPA	Extraction_solvent	anisole	000100-66-3	31.5625	33.0909
DEF	SBPA	Extraction_solvent	(dichloromethyl)-benzene	000098-87-3	27.907	33.1061
DEF	SBPA	Extraction_solvent	2,3-dimethylbutanol	019550-30-2	27.8977	33.1094
DEF	SBPA	Extraction_solvent	1-(2-hydroxyphenyl)ethanone	000118-93-4	30.997	33.1182
DMF	SBPA	Extraction_solvent	methylcyclopropylether	000540-47-6	28.9609	33.1343
DEF	SBPA	Extraction_solvent	carvomenthol	000499-69-4	28.265	33.1635
DEF	SBPA	Extraction_solvent	3-chlorobenzeneamine	000108-42-9	27.4786	33.1688
DEF	SBPA	Extraction_solvent	2-furancarbonitrile	000617-90-3	31.8294	33.187
DEF	SBPA	Extraction_solvent	valerylchloride	000638-29-9	30.8044	33.1971
DEF	SBPA	Extraction_solvent	1-(chloromethyl)-2-methylbenzene	000552-45-4	31.4963	33.1987
DEF	SBPA	Extraction_solvent	1,2,3,4-tetrahydroquinoline	000635-46-1	27.6097	33.2006
DEF	SBPA	Extraction_solvent	2-pentanol	006032-29-7	28.9157	33.2188
DEF	SBPA	Extraction_solvent	1-undecyne	002243-98-3	28.8742	33.2387
DEF	SBPA	Extraction_solvent	1,3-dichloropropene	000542-75-6	23.7818	33.2589
DEF	SBPA	Extraction_solvent	2-nonanol	000628-99-9	27.4628	33.2594
DEF	SBPA	Extraction_solvent	3-chloro-2-butanone	004091-39-8	24.6328	33.2697
DEF	SBPA	Extraction_solvent	3-heptanol	000589-82-2	29.2285	33.2811
DEF	SBPA	Extraction_solvent	salicylicaldehyde	000090-02-8	26.5583	33.2818
DEF	SBPA	Extraction_solvent	3-chloro-2-(chloromethyl)-1-propene	001871-57-4	22.7989	33.2823
DEF	SBPA	Extraction_solvent	ethylalpha-chloropropionate	000535-13-7	28.0491	33.3002
DMF	SBPA	Extraction_solvent	heptanamide	000628-62-6	22.4906	33.3079
DEF	SBPA	Extraction_solvent	1,4-butanedithiol	001191-08-8	27.3704	33.3123
DEF	SBPA	Extraction_solvent	sec-phenethylalcohol	000098-85-1	29.3073	33.3131
DEF	SBPA	Extraction_solvent	2,3-dihydrobenzofuran	000496-16-2	31.6655	33.314
DEF	SBPA	Extraction_solvent	1-pentanethiol	000110-66-7	31.363	33.3449
DEF	SBPA	Extraction_solvent	benzoylfluoride	000455-32-3	30.4474	33.3693
DEF	SBPA	Extraction_solvent	m-chlorobenzaldehyde	000587-04-2	29.353	33.3895
DEF	SBPA	Extraction_solvent	1,2-(ethylenedioxy)benzene	000493-09-4	30.0443	33.3906
DEF	SBPA	Extraction_solvent	isobutylformate	000542-55-2	24.5499	33.4077
DEF	SBPA	Extraction_solvent	1-nitrohexane	000646-14-0	27.5735	33.4138
DEF	SBPA	Extraction_solvent	2,3-dichloro-1-propene	000078-88-6	12.1028	33.4221
DEF	SBPA	Extraction_solvent	1,2,2-trichloropropane	003175-23-3	23.8853	33.4414
DEF	SBPA	Extraction_solvent	ethylthiocyanate	000542-90-5	30.0844	33.4457
DEF	SBPA	Extraction_solvent	4-chloroanisole	000623-12-1	29.8795	33.4493
DEF	SBPA	Extraction_solvent	succinylchloride	000543-20-4	25.7417	33.4513
DMF	SBPA	Extraction_solvent	e4-oh-xx-tetracyclo(6-2-1-1(3,6)-0(2,7))dodecane	074007-11-7	30.3605	33.4518
DEF	SBPA	Extraction_solvent	methylthiophene	000616-44-4	27.1835	33.4633
DEF	SBPA	Extraction_solvent	4,4-dimethyl-2-pentanone	000590-50-1	29.223	33.465
DMF	SBPA	Extraction_solvent	octahydro-3a-methyl-cis-2h-inden-2-one	013351-29-6	29.754	33.4658
DEF	SBPA	Extraction_solvent	2-vinylfuran	001487-18-9	26.3898	33.4684
DEF	SBPA	Extraction_solvent	formicacidhexylester	000629-33-4	28.7687	33.474
DEF	SBPA	Extraction_solvent	phenylacetate	000122-79-2	32.196	33.4742
DEF	SBPA	Extraction_solvent	1-methoxy-3-methylbutane	000626-91-5	30.8155	33.4884
DEF	SBPA	Extraction_solvent	1,2-dichloropropane	000078-87-5	32.0654	33.4926
DEF	SBPA	Extraction_solvent	3-hexanone	000589-38-8	28.1487	33.5228
DEF	SBPA	Extraction_solvent	1,3-dichlorobenzene	000541-73-1	26.3075	33.5428
DEF	SBPA	Extraction_solvent	2-chloroethylethylether	000628-34-2	28.9437	33.5675
DEF	SBPA	Extraction_solvent	3,4-dichloro-1-butene	000760-23-6	24.2592	33.5683
DEF	SBPA	Extraction_solvent	(ethenyloxy)-benzene	000766-94-9	30.0479	33.5725
DEF	SBPA	Extraction_solvent	1,2,4-trichlorobenzene	000120-82-1	27.5351	33.5751
DEF	SBPA	Extraction_solvent	pentachloroethane	000076-01-7	22.0877	33.5763
DMF	SBPA	Extraction_solvent	ch2clbr	000074-97-5	20.3559	33.6038
DEF	SBPA	Extraction_solvent	1-heptyne	000628-71-7	22.3511	33.6476
DEF	SBPA	Extraction_solvent	4-fluoroanisole	000459-60-9	30.9427	33.6576
DEF	SBPA	Extraction_solvent	2,4-difluoroaniline	000367-25-9	25.1422	33.6657
DEF	SBPA	Extraction_solvent	ethylaluminumdichloride	000563-43-9	24.5335	33.6671
DMF	SBPA	Extraction_solvent	4-methylpyridine	000108-89-4	28.3708	33.6681
DMF	SBPA	Extraction_solvent	4-thiazolecarbonitrile	001452-15-9	26.1973	33.6794
DEF	SBPA	Extraction_solvent	tetrahydrolinalool	000078-69-3	13.231	33.6868
DEF	SBPA	Extraction_solvent	carbonochloridicacidethylester	000541-41-3	32.0254	33.6894
DEF	SBPA	Extraction_solvent	3-methyl-2-butanone	000563-80-4	32.0413	33.7013
DMF	SBPA	Extraction_solvent	chbr3	000075-25-2	23.985	33.7199
DMF	SBPA	Extraction_solvent	2-methylbutyronitrile	018936-17-9	28.1067	33.7303
DEF	SBPA	Extraction_solvent	methylpropionate	000554-12-1	29.628	33.7352
DMF	SBPA	Extraction_solvent	2-propynal	000624-67-9	17.2521	33.7392
DMF	SBPA	Extraction_solvent	valeronitrile	000110-59-8	27.4262	33.7558
DEF	SBPA	Extraction_solvent	methyl2-chloropropanoate	017639-93-9	26.7933	33.8015
DEF	SBPA	Extraction_solvent	2-bromothiophene	001003-09-4	27.2317	33.8125
DEF	SBPA	Extraction_solvent	2-propenoicacidethylester	000140-88-5	26.9012	33.8258
DEF	SBPA	Extraction_solvent	3,7-dimethyl-6-octen-1-ol	000106-22-9	24.9524	33.8332
DEF	SBPA	Extraction_solvent	2-methoxypyridine	001628-89-3	31.1882	33.8409
DEF	SBPA	Extraction_solvent	1,2-dichloro-2-fluoropropane	000420-97-3	25.5712	33.8509
DEF	SBPA	Extraction_solvent	cis-1,2-dichloroethene	000156-59-2	25.3061	33.8567
DEF	SBPA	Extraction_solvent	2-ethyl-1-hexanol	000104-76-7	25.6134	33.8757
DEF	SBPA	Extraction_solvent	3-methylfuran	000930-27-8	31.6409	33.9085
DEF	SBPA	Extraction_solvent	1,3-dichloro-3-methylbutane	000624-96-4	31.1134	33.9128
DEF	SBPA	Extraction_solvent	ethynylbenzene	000536-74-3	21.9255	33.9322
DEF	SBPA	Extraction_solvent	cyclohexyl-hydroperoxide	000766-07-4	29.2667	33.9366
DEF	SBPA	Extraction_solvent	4-methyl-1-octanol	038514-03-3	28.7484	33.9428
DEF	SBPA	Extraction_solvent	hexanal	000066-25-1	28.2934	33.9431
DMF	SBPA	Extraction_solvent	ethylpyruvate	000617-35-6	23.6107	33.9506
DEF	SBPA	Extraction_solvent	butanethiol	000109-79-5	31.2036	33.9655
DEF	SBPA	Extraction_solvent	m-chloroanisole	002845-89-8	30.026	33.9788
DEF	SBPA	Extraction_solvent	methyl-phenethyl-ether	003558-60-9	31.3066	33.9881
DMF	SBPA	Extraction_solvent	dimethylmalonate	000108-59-8	28.3329	33.9958
DMF	SBPA	Extraction_solvent	5-chloropentanenitrile	006280-87-1	26.7935	33.9975
DMF	SBPA	Extraction_solvent	(e-)-3-hexenedinitrile	001119-85-3	28.1047	34.0026
DEF	SBPA	Extraction_solvent	3-octanone	000106-68-3	31.1685	34.0047
DEF	SBPA	Extraction_solvent	hexyne	000693-02-7	23.5907	34.0076
DEF	SBPA	Extraction_solvent	trimethoxymethane	000149-73-5	31.274	34.0085
DEF	SBPA	Extraction_solvent	1,3-benzodioxole	000274-09-9	26.3149	34.0153
DEF	SBPA	Extraction_solvent	1,3,5-trifluorobenzene	000372-38-3	12.1028	34.0174
DMF	SBPA	Extraction_solvent	3,4-dimethylpyridine	000583-58-4	27.449	34.0443
DEF	SBPA	Extraction_solvent	m-difluorobenzene	000372-18-9	31.8545	34.0498
DEF	SBPA	Extraction_solvent	1,2,4-trifluorobenzene	000367-23-7	28.6446	34.085
DEF	SBPA	Extraction_solvent	1,4-dichloro-2-methylbutane	000623-34-7	30.1685	34.1009
DEF	SBPA	Extraction_solvent	2-methyl-2-propenoylchloride	000920-46-7	31.69	34.1247
DEF	SBPA	Extraction_solvent	benzenemethanethiol	000100-53-8	27.4338	34.136
DMF	SBPA	Extraction_solvent	1-(2,4-dimethylphenyl)ethanone	000089-74-7	28.1545	34.1509
DEF	SBPA	Extraction_solvent	e4-oh-xx-tetracyclo(6-2-1-1(3,6)-0(2,7))dodecane	074007-11-7	27.721	34.1718
DEF	SBPA	Extraction_solvent	2,4-dichloro-1-(trifluoromethyl)-benzene	000320-60-5	26.823	34.1741
DEF	SBPA	Extraction_solvent	2-chlorobenzaldehyde	000089-98-5	30.622	34.1787
DMF	SBPA	Extraction_solvent	n-allylaniline	000589-09-3	25.4774	34.2282
DEF	SBPA	Extraction_solvent	5-methyl-1-hexyne	002203-80-7	22.2591	34.2365
DEF	SBPA	Extraction_solvent	ethyl2-propynoate	000623-47-2	23.9812	34.2365
DEF	SBPA	Extraction_solvent	diiodomethane	000075-11-6	22.87	34.2388
DEF	SBPA	Extraction_solvent	1,3-dichlorobutane	001190-22-3	30.3916	34.2391
DEF	SBPA	Extraction_solvent	methylcyclopropylcarboxylate	002868-37-3	27.5667	34.2439
DMF	SBPA	Extraction_solvent	1-(4-chlorophenyl)ethanone	000099-91-2	28.675	34.2462
DEF	SBPA	Extraction_solvent	3-methyl-1-butanethiol	000541-31-1	30.5845	34.2517
DEF	SBPA	Extraction_solvent	2-methyl-1-heptanol	060435-70-3	29.423	34.2615
DMF	SBPA	Catalyst_solvent	1-hexyl-1,2,3,4-tetrahydronaphthalene	066325-11-9	38.4503	34.286
DEF	SBPA	Extraction_solvent	3,3-dichloropropene	000563-57-5	25.0446	34.2943
DEF	SBPA	Extraction_solvent	methyltrimethylacetate	000598-98-1	29.8412	34.2964
DMF	SBPA	Extraction_solvent	1,2-dichloro-1,1-difluoroethane	001649-08-7	19.9277	34.3039
DMF	SBPA	Extraction_solvent	3-methylbutanenitrile	000625-28-5	30.0207	34.3103
DEF	SBPA	Extraction_solvent	3-methylpentanal	015877-57-3	28.173	34.3277
DEF	SBPA	Extraction_solvent	dimethylaluminiumchloride	001184-58-3	25.2258	34.3321
DMF	SBPA	Extraction_solvent	cis-1,2,3,6-tetrahydrophthalicanhydride	000935-79-5	29.2658	34.349
DMF	SBPA	Extraction_solvent	alpha-ionone	000127-41-3	30.4787	34.353
DEF	SBPA	Extraction_solvent	dimethylcarbonate	000616-38-6	29.2636	34.355
DEF	SBPA	Extraction_solvent	4-methylthiazole	000693-95-8	32.0085	34.3637
DEF	SBPA	Extraction_solvent	1,2-dichloro-1-ethoxyethane	000623-46-1	25.3132	34.3776
DEF	SBPA	Extraction_solvent	2-butenoylchloride	010487-71-5	26.6201	34.3954
DEF	SBPA	Extraction_solvent	1,3-dichloro-2-methylpropane	000616-19-3	30.373	34.3975
DEF	SBPA	Extraction_solvent	1,1,1-trichloro-2-fluoroethane	002366-36-1	25.5117	34.4077
DEF	SBPA	Extraction_solvent	butoxide	000106-88-7	30.1691	34.4136
DEF	SBPA	Extraction_solvent	benzofuran	000271-89-6	25.9158	34.4233
DEF	SBPA	Extraction_solvent	tert-butylacetate	000540-88-5	29.0447	34.4244
DEF	SBPA	Extraction_solvent	2,4-dimethyl-3-pentanone	000565-80-0	31.6708	34.4411
DEF	SBPA	Extraction_solvent	2-propynal	000624-67-9	12.1028	34.4569
DMF	SBPA	Catalyst_solvent	1,2,2a,3,4,5-hexahydroacenaphthylene	000480-72-8	39.9034	34.4709
DEF	SBPA	Extraction_solvent	thiophene	000110-02-1	29.3045	34.473
DEF	SBPA	Extraction_solvent	p-difluorobenzene	000540-36-3	29.203	34.4853
DEF	SBPA	Extraction_solvent	1,4-diiodobutane	000628-21-7	29.0874	34.4922
DEF	SBPA	Extraction_solvent	cis-1,4-dichloro-2-butene	001476-11-5	26.5128	34.5214
DEF	SBPA	Extraction_solvent	n,n,n',n'-tetramethyl-1,4-butanediamine	000111-51-3	32.0497	34.5262
DMF	SBPA	Extraction_solvent	3,4-dihydro-2(1h)-naphthalenone	000530-93-8	25.9079	34.5355
DEF	SBPA	Extraction_solvent	methyln-butylether	000628-28-4	30.9652	34.5359
DEF	SBPA	Extraction_solvent	trichloroethene	000079-01-6	31.5394	34.5426
DEF	SBPA	Extraction_solvent	1,4-dichloro-2-butene	000764-41-0	27.1108	34.5624
DEF	SBPA	Extraction_solvent	styreneoxide	000096-09-3	29.6508	34.5689
DEF	SBPA	Extraction_solvent	1,1-dichloropropane	000078-99-9	29.2695	34.5959
DEF	SBPA	Extraction_solvent	2,4-dithiapentane	001618-26-4	32.1239	34.6119
DMF	SBPA	Extraction_solvent	1,1-dimethoxyethane	000534-15-6	29.2558	34.6265
DEF	SBPA	Extraction_solvent	2-propenoicacidbutylester	000141-32-2	29.5058	34.634
DEF	SBPA	Extraction_solvent	2-propenoicacidpropylester	000925-60-0	28.1914	34.6348
DEF	SBPA	Extraction_solvent	2-bromo-2-chloro-1,1,1-trifluoroethane	000151-67-7	24.0342	34.6394
DEF	SBPA	Extraction_solvent	1,5-dichloro-pentane	000628-76-2	30.9972	34.6448
DEF	SBPA	Extraction_solvent	1,4-dichloro-trans-2-butene	000110-57-6	27.0749	34.6448
DEF	SBPA	Extraction_solvent	1,4-dichloropentane	000626-92-6	31.2379	34.6593
DEF	SBPA	Extraction_solvent	1,1-dichlorobutane	000541-33-3	26.1676	34.6621
DMF	SBPA	Extraction_solvent	ch2br2	000074-95-3	21.3087	34.6794
DEF	SBPA	Extraction_solvent	ethylbutyrate	000105-54-4	28.8759	34.6837
DMF	SBPA	Extraction_solvent	5-nitro-2-furancarboxylicacidmethylester	001874-23-3	22.9839	34.7089
DEF	SBPA	Extraction_solvent	2-bromopyridine	000109-04-6	31.3901	34.7142
DEF	SBPA	Extraction_solvent	butyrylchloride	000141-75-3	29.3517	34.7227
DMF	SBPA	Extraction_solvent	diamantan-1-ol	030545-14-3	25.6385	34.7238
DEF	SBPA	Extraction_solvent	1,2,4,5-tetrafluorobenzene	000327-54-8	26.3658	34.7369
DEF	SBPA	Extraction_solvent	o-fluoroaniline	000348-54-9	24.5899	34.8075
DEF	SBPA	Extraction_solvent	1-dodecyne	000765-03-7	32.035	34.8158
DEF	SBPA	Extraction_solvent	benzofurazan	000273-09-6	31.1376	34.8205
DMF	SBPA	Extraction_solvent	n,n-diprop-2-yn-1-ylprop-2-yn-1-amine	006921-29-5	9.1058	34.8318
DEF	SBPA	Extraction_solvent	1,2,3,5-tetrafluorobenzene	002367-82-0	30.2825	34.8392
DEF	SBPA	Extraction_solvent	sulfurousaciddiethylester	000623-81-4	30.692	34.844
DEF	SBPA	Extraction_solvent	2,2'-dichlorodiethylsulfide	000505-60-2	29.2741	34.8604
DEF	SBPA	Extraction_solvent	(c-chloroethoxy)ethene	000110-75-8	26.7171	34.8627
DMF	SBPA	Extraction_solvent	succinylchloride	000543-20-4	22.6852	34.8713
DEF	SBPA	Extraction_solvent	2-methylhexanal	000925-54-2	29.1971	34.8904
DEF	SBPA	Extraction_solvent	trimethylorthoacetate	001445-45-0	28.0346	34.9254
DMF	SBPA	Catalyst_solvent	1,2,3,4,5,6,7,8-octahydroanthracene	001079-71-6	38.6936	34.9489
DMF	SBPA	Extraction_solvent	pseudoionone	000141-10-6	28.5162	34.96
DEF	SBPA	Extraction_solvent	allyl-methyl-disulfide	002179-58-0	32.2593	35.0082
DEF	SBPA	Extraction_solvent	heptanenitrile	000629-08-3	30.2707	35.0098
DEF	SBPA	Extraction_solvent	ethylisoamylketone	000624-42-0	32.0502	35.0225
DMF	SBPA	Extraction_solvent	1,1-diphenylmethanimine	001013-88-3	22.5691	35.0287
DEF	SBPA	Extraction_solvent	1,2-dichlorobenzene	000095-50-1	28.5743	35.0381
DMF	SBPA	Catalyst_solvent	octadecanoicacidethylester	000111-61-5	39.9106	35.0408
DEF	SBPA	Extraction_solvent	nerol	000106-25-2	29.1219	35.0494
DEF	SBPA	Extraction_solvent	1-nonanol	000143-08-8	28.4745	35.0684
DEF	SBPA	Extraction_solvent	1,2-dibromoethane	000106-93-4	26.3147	35.0719
DEF	SBPA	Extraction_solvent	1-bromo-1-chloroethane	000593-96-4	28.823	35.0753
DEF	SBPA	Extraction_solvent	isopropylpropionate	000637-78-5	30.3657	35.0778
DEF	SBPA	Extraction_solvent	1,1,2-trichloropropane	000598-77-6	22.2422	35.1288
DMF	SBPA	Extraction_solvent	[3-(2,3-epoxyproxy)propyl]trimethoxysilane	002530-83-8	28.8707	35.1533
DEF	SBPA	Extraction_solvent	3-methylbutanoicacidethylester	000108-64-5	29.8944	35.1558
DEF	SBPA	Extraction_solvent	4-methyl-1-pentyne	007154-75-8	24.6543	35.2097
DEF	SBPA	Extraction_solvent	1,4-dibrombenzene	000106-37-6	29.3822	35.2207
DMF	SBPA	Extraction_solvent	cyclopropanecarbonitrile	005500-21-0	27.0214	35.2283
DEF	SBPA	Extraction_solvent	bromoaceticacidmethylester	000096-32-2	26.093	35.3049
DMF	SBPA	Catalyst_solvent	2,6-di-tert-butylpyridine	000585-48-8	38.4322	35.379
DEF	SBPA	Extraction_solvent	propylpropionate	000106-36-5	28.6636	35.4089
DEF	SBPA	Extraction_solvent	methyl-n-propylether	000557-17-5	26.1229	35.4134
DEF	SBPA	Extraction_solvent	1,3-diiodopropane	000627-31-6	27.7343	35.4244
DEF	SBPA	Extraction_solvent	2,3,6-trimethylphenol	002416-94-6	12.3653	35.4491
DEF	SBPA	Extraction_solvent	trans-1,2-dichloroethene	000156-60-5	12.1028	35.5449
DEF	SBPA	Extraction_solvent	dimethoxydimethylsilane	001112-39-6	31.4659	35.5515
DEF	SBPA	Extraction_solvent	(chloromethyl)-benzene	000100-44-7	27.7284	35.568
DMF	SBPA	Extraction_solvent	trans-dicyano-1-butene	002141-59-5	27.8275	35.5715
DEF	SBPA	Extraction_solvent	trans-3-penten-1-yne	002004-69-5	25.4	35.5734
DMF	SBPA	Extraction_solvent	2-methylpentanedinitrile	004553-62-2	27.8489	35.581
DEF	SBPA	Extraction_solvent	3,5,5-trimethylhexanal	005435-64-3	31.1289	35.5815
DEF	SBPA	Extraction_solvent	isobutylpropionate	000540-42-1	31.3444	35.6072
DEF	SBPA	Extraction_solvent	pentyne	000627-19-0	31.8344	35.6214
DEF	SBPA	Extraction_solvent	2-fluorobenzaldehyde	000446-52-6	29.1443	35.6244
DEF	SBPA	Extraction_solvent	isocyanatomethane	000624-83-9	16.1104	35.6316
DEF	SBPA	Extraction_solvent	1,4-dichlorobutane	000110-56-5	27.3273	35.6553
DEF	SBPA	Extraction_solvent	chbr3	000075-25-2	21.6932	35.6655
DEF	SBPA	Extraction_solvent	ethylcyclopropane	001191-96-4	24.071	35.7396
DMF	SBPA	Catalyst_solvent	beta-caryophyllene	000087-44-5	38.2481	35.7475
DEF	SBPA	Extraction_solvent	allylethylether	000557-31-3	27.3596	35.7596
DEF	SBPA	Extraction_solvent	1-chloro-3-bromopropane	000109-70-6	25.7163	35.7686
DEF	SBPA	Extraction_solvent	1-penten-4-yne	000871-28-3	25.1716	35.7702
DMF	SBPA	Extraction_solvent	delta-decalactone	000705-86-2	29.9187	35.7888
DEF	SBPA	Extraction_solvent	1-chloro-2-fluoroethane	000762-50-5	12.1028	35.809
DEF	SBPA	Extraction_solvent	vinyltrichlorosilane	000075-94-5	28.608	35.8599
DMF	SBPA	Extraction_solvent	diamantanone	030545-23-4	30.6679	35.8777
DMF	SBPA	Extraction_solvent	2,6-dimethylpiperidine	000504-03-0	29.4919	35.8795
DEF	SBPA	Extraction_solvent	1,1,1,2-tetrachloroethane	000630-20-6	22.5888	35.8867
DEF	SBPA	Extraction_solvent	1,3-dichloro-trans-2-butene	010075-38-4	28.2392	35.8917
DEF	SBPA	Extraction_solvent	2-chloroethylmethylsulfide	000542-81-4	28.7414	35.926
DEF	SBPA	Extraction_solvent	2-methyl-1-buten-3-yne	000078-80-8	30.4712	36.0316
DEF	SBPA	Extraction_solvent	propylmethacrylate	002210-28-8	29.5858	36.0398
DMF	SBPA	Catalyst_solvent	hexamethylbenzene	000087-85-4	38.4047	36.0554
DEF	SBPA	Extraction_solvent	1,2,3-trichloropropene	000096-19-5	23.6144	36.0689
DMF	SBPA	Catalyst_solvent	2-methyl-2-propenoicacidhexadecylester	002495-27-4	39.8097	36.0793
DEF	SBPA	Extraction_solvent	ethyl1,1,2,2-tetrafluoroethylether	000512-51-6	12.1028	36.095
DEF	SBPA	Extraction_solvent	2-chlorothiophene	000096-43-5	26.2402	36.1231
DMF	SBPA	Extraction_solvent	ethylacetate	000141-78-6	34.0214	36.1896
DEF	SBPA	Extraction_solvent	n-crotylacetate	000628-08-0	26.8652	36.2287
DEF	SBPA	Extraction_solvent	1,2-dichloropentane	001674-33-5	28.1448	36.2294
DMF	SBPA	Catalyst_solvent	1,2,4-triethylbenzene	000877-44-1	38.5216	36.316
DEF	SBPA	Extraction_solvent	1,1-dichloroethane	000075-34-3	12.1028	36.3903
DEF	SBPA	Extraction_solvent	1,2-dibromopropane	000078-75-1	26.027	36.4124
DEF	SBPA	Extraction_solvent	1,1-dichloro-3-methylbutane	000625-66-1	31.5273	36.4286
DMF	SBPA	Catalyst_solvent	cyclopentadecane	000295-48-7	35.8124	36.4411
DEF	SBPA	Extraction_solvent	2-methylpropanoicacidethylester	000097-62-1	28.5889	36.4491
DEF	SBPA	Extraction_solvent	4-methyl-2-hydroxyquinoline	084909-43-3	29.8406	36.4564
DEF	SBPA	Extraction_solvent	1h,8h-hexadecafluorooctane	000307-99-3	21.3707	36.4598
DMF	SBPA	Extraction_solvent	1,1,1,2,2,3,4,5,5,5-decafluoropentane	138495-42-8	24.4289	36.5877
DMF	SBPA	Extraction_solvent	2-bromo-2-chloro-1,1,1-trifluoroethane	000151-67-7	28.3605	36.5877
DEF	SBPA	Extraction_solvent	cis-3-penten-1-yne	001574-40-9	25.4	36.5977
DEF	SBPA	Extraction_solvent	2,6-diisopropylaniline	024544-04-5	31.4303	36.6366
DEF	SBPA	Extraction_solvent	methylcyclopropylether	000540-47-6	31.7066	36.6558
DMF	SBPA	Extraction_solvent	gamma-decalactone	000706-14-9	29.5459	36.685
DEF	SBPA	Extraction_solvent	ethanethioicacid-s-ethylester	000625-60-5	27.126	36.685
DMF	SBPA	Catalyst_solvent	bisabolene	000495-62-5	38.3063	36.6905
DEF	SBPA	Extraction_solvent	octanal	000124-13-0	31.7368	36.7603
DEF	SBPA	Extraction_solvent	2,3-dihydrothiophene	001120-59-8	20.0576	36.8035
DEF	SBPA	Extraction_solvent	trichloroacetaldehyde	000075-87-6	25.637	36.8106
DMF	SBPA	Catalyst_solvent	tricyclo[8,2,2,24,7]-hexadecane	000283-68-1	35.8297	36.8657
DEF	SBPA	Extraction_solvent	3-fluorochlorobenzene	000625-98-9	25.6509	36.9419
DMF	SBPA	Catalyst_solvent	dicyclohexylsulfide	007133-46-2	40.0456	36.9751
DMF	SBPA	Catalyst_solvent	pentylnitrite	000463-04-7	40.0518	36.9751
DMF	SBPA	Extraction_solvent	isopropylacetate	000108-21-4	29.9994	36.9871
DMF	SBPA	Extraction_solvent	cubane-1,4-dicarboylicaciddimethylester	029412-62-2	27.4721	37.0159
DEF	SBPA	Extraction_solvent	4-chloro-1-butene	000927-73-1	15.3846	37.0327
DMF	SBPA	Catalyst_solvent	1,3-diethyl-5-methylbenzene	002050-24-0	38.751	37.0406
DEF	SBPA	Extraction_solvent	2-ethoxy-2-methyl-propane	000637-92-3	31.4091	37.0475
DEF	SBPA	Extraction_solvent	benzene	000071-43-2	24.036	37.1583
DMF	SBPA	Catalyst_solvent	spiro[5,5]undecane	000180-43-8	35.5634	37.1865
DEF	SBPA	Extraction_solvent	acetylchloride	000075-36-5	12.1028	37.1919
DMF	SBPA	Extraction_solvent	propiolonitrile	001070-71-9	10.6982	37.2395
DMF	SBPA	Catalyst_solvent	1-fluorooctane	000463-11-6	38.6552	37.2522
DEF	SBPA	Extraction_solvent	1,3-dibromobenzene	000108-36-1	31.2397	37.3868
DMF	SBPA	Catalyst_solvent	1,2-heptadiene	002384-90-9	38.4167	37.392
DEF	SBPA	Extraction_solvent	1-chlorobutane	000109-69-3	30.4969	37.4648
DEF	SBPA	Extraction_solvent	vinylformate	000692-45-5	31.3532	37.4802
DEF	SBPA	Extraction_solvent	o-chlorofluorobenzene	000348-51-6	26.3544	37.5018
DEF	SBPA	Extraction_solvent	ethylvinylsulfide	000627-50-9	24.7661	37.5044
DMF	SBPA	Catalyst_solvent	1-fluorononane	000463-18-3	38.2891	37.5447
DEF	SBPA	Extraction_solvent	2,3-dichloropentane	000600-11-3	27.4755	37.5471
DEF	SBPA	Extraction_solvent	2-methyl-3-heptanone	013019-20-0	31.2286	37.5934
DMF	SBPA	Catalyst_solvent	1,3,5-trimethyladamantane	000707-35-7	35.7153	37.6585
DMF	SBPA	Extraction_solvent	4,5,6-trichloroguaiacol	002668-24-8	9.1058	37.6792
DEF	SBPA	Extraction_solvent	methylbutyrate	000623-42-7	27.2381	37.7125
DMF	SBPA	Catalyst_solvent	1,2,3,4-tetrahydro-6-methylnaphthalene	001680-51-9	39.7246	37.8111
DMF	SBPA	Extraction_solvent	benzo[g]quinoline	000260-36-6	25.255	37.8132
DMF	SBPA	Catalyst_solvent	3-methylene-6-(1-methylethyl)cyclohexene	000555-10-2	38.4138	37.816
DEF	SBPA	Extraction_solvent	1,1-dichloro-2-methylpropane	000598-76-5	28.1145	37.8383
DMF	SBPA	Catalyst_solvent	dipentene	000138-86-3	38.3293	37.8523
DMF	SBPA	Catalyst_solvent	1,1-diethylcyclohexane	000078-01-3	35.4017	37.8746
DMF	SBPA	Catalyst_solvent	1-ethyltetralin	013556-58-6	39.993	37.8954
DMF	SBPA	Catalyst_solvent	triamantane	013349-10-5	35.8788	37.9532
DMF	SBPA	Catalyst_solvent	3-nonyne	020184-89-8	38.4155	38.0492
DMF	SBPA	Extraction_solvent	dispersered13-	003180-81-2	13.2283	38.0555
DMF	SBPA	Extraction_solvent	n-methylbenzeneethanamine	000589-08-2	27.6348	38.0724
DEF	SBPA	Extraction_solvent	4-heptanone	000123-19-3	29.5675	38.0763
DEF	SBPA	Extraction_solvent	octyne	000629-05-0	23.1571	38.1033
DEF	SBPA	Extraction_solvent	1,3-dichloro-2-butene	000926-57-8	25.6372	38.1898
DEF	SBPA	Extraction_solvent	2-hexen-4-yne	014092-20-7	26.9693	38.2042
DMF	SBPA	Catalyst_solvent	diisopentylsulfide	000544-02-5	39.9146	38.2327
DEF	SBPA	Extraction_solvent	methyltrichlorogermane	000993-10-2	24.4351	38.3002
DMF	SBPA	Catalyst_solvent	dinonylether	002456-27-1	38.3969	38.3157
DMF	SBPA	Catalyst_solvent	cis-3-methyl-2-hexene	010574-36-4	36.1173	38.3157
DMF	SBPA	Catalyst_solvent	hexahydroindene	000496-10-6	35.3803	38.3464
DEF	SBPA	Extraction_solvent	dcip	000108-60-1	27.1497	38.3869
DMF	SBPA	Catalyst_solvent	perfluoropentane	000678-26-2	34.2401	38.4099
DMF	SBPA	Catalyst_solvent	cubane	000277-10-1	35.5902	38.4506
DMF	SBPA	Catalyst_solvent	1-methyl-4-vinylcyclohexene	017699-86-4	38.5716	38.4817
DMF	SBPA	Catalyst_solvent	chlorotrifluorosilane	014049-36-6	38.6191	38.4817
DMF	SBPA	Catalyst_solvent	hexamethylphosphotriamide	001608-26-0	38.6332	38.4817
DMF	SBPA	Catalyst_solvent	trans-perfluorodecalin	060433-12-7	34.3808	38.5496
DEF	SBPA	Extraction_solvent	4-nitroso-1-naphthalenol	000605-60-7	28.4958	38.5592
DMF	SBPA	Catalyst_solvent	butylcyclopentane	002040-95-1	35.2645	38.6229
DMF	SBPA	Catalyst_solvent	2-methyl-nonane	000871-83-0	35.2085	38.6255
DMF	SBPA	Catalyst_solvent	3,4-dimethylheptane	000922-28-1	35.1833	38.6255
DEF	SBPA	Extraction_solvent	1,1,1,2,2,3,4,5,5,5-decafluoropentane	138495-42-8	12.1028	38.6704
DMF	SBPA	Catalyst_solvent	trans-1,2-dimethylcyclohexane	006876-23-9	35.278	38.6785
DMF	SBPA	Catalyst_solvent	cis-perfluorodecalin	000306-94-5	34.381	38.6818
DMF	SBPA	Catalyst_solvent	cis-decalin	000493-01-6	35.43	38.6879
DMF	SBPA	Catalyst_solvent	butylcyclohexane	001678-93-9	35.2922	38.6879
DMF	SBPA	Catalyst_solvent	hexane	000110-54-3	35.0051	38.6899
DMF	SBPA	Catalyst_solvent	(1-methylethyl)-cyclopentane	003875-51-2	35.2519	38.6925
DMF	SBPA	Catalyst_solvent	3,3-diethylpentane	001067-20-5	35.2357	38.6959
DMF	SBPA	Catalyst_solvent	2,4-dimethyl-1,3-pentadiene	001000-86-8	38.107	38.6972
DMF	SBPA	Catalyst_solvent	1,2-dimethyl-3-propylbenzene	017059-44-8	39.8116	38.6979
DMF	SBPA	Catalyst_solvent	3-ethyl-2,4-dimethylpentane	001068-87-7	35.2156	38.7062
DMF	SBPA	Catalyst_solvent	2,7-dimethyloctane	001072-16-8	35.2521	38.7094
DMF	SBPA	Catalyst_solvent	trans-1,4-diethylcyclohexane	013990-93-7	35.3194	38.7094
DMF	SBPA	Catalyst_solvent	cis-1-ethyl-4-methylcyclohexane	004926-78-7	35.3158	38.712
DMF	SBPA	Catalyst_solvent	trans-1-ethyl-4-methylcyclohexane	006236-88-0	35.3158	38.7174
DMF	SBPA	Catalyst_solvent	octane	000111-65-9	35.099	38.7192
DMF	SBPA	Catalyst_solvent	methylcycloheptane	004126-78-7	35.3262	38.7209
DMF	SBPA	Catalyst_solvent	1-methyl-3-ethylcyclopentane	003726-47-4	35.2366	38.7223
DMF	SBPA	Catalyst_solvent	5-methyl-nonane	015869-85-9	35.2044	38.7226
DMF	SBPA	Catalyst_solvent	2,3,5-trimethylhexane	001069-53-0	35.2555	38.725
DMF	SBPA	Catalyst_solvent	3-methyloctane	002216-33-3	35.1572	38.7269
DMF	SBPA	Catalyst_solvent	n-decane	000124-18-5	35.1859	38.7269
DMF	SBPA	Catalyst_solvent	cis-1-ethyl-3-methylcyclohexane	019489-10-2	35.3396	38.7295
DMF	SBPA	Catalyst_solvent	pentylcyclopentane	003741-00-2	35.307	38.7317
DMF	SBPA	Catalyst_solvent	1,2,3-trimethylcyclohexane	001678-97-3	35.3487	38.7323
DMF	SBPA	Catalyst_solvent	2-methyldecane	006975-98-0	35.262	38.7345
DEF	SBPA	Extraction_solvent	3,3-dimethyl-1-butyne	000917-92-0	24.7915	38.7358
DMF	SBPA	Catalyst_solvent	2-methyloctane	003221-61-2	35.1712	38.7394
DMF	SBPA	Catalyst_solvent	tetraethylgermane	000597-63-7	35.1401	38.7394
DMF	SBPA	Catalyst_solvent	cis,cis,cis-1,2,3-trimethylcyclopentane	002613-69-6	35.2758	38.7394
DMF	SBPA	Catalyst_solvent	1,2,3-trimethylcyclohexane,(1a,2b,3a)	001678-81-5	35.3487	38.7421
DEF	SBPA	Extraction_solvent	1,3-dibromopropane	000109-64-8	26.2742	38.7492
DMF	SBPA	Catalyst_solvent	4-nonyne	020184-91-2	38.3947	38.7501
DMF	SBPA	Catalyst_solvent	3-ethylheptane	015869-80-4	35.1177	38.7535
DMF	SBPA	Catalyst_solvent	n-heptane	000142-82-5	35.05	38.7535
DMF	SBPA	Catalyst_solvent	2,3,3,4-tetramethylpentane	016747-38-9	35.3459	38.7551
DMF	SBPA	Catalyst_solvent	n-propylcyclohexane	001678-92-8	35.2668	38.7561
DMF	SBPA	Catalyst_solvent	4-ethyl-2-methylhexane	003074-75-7	35.2259	38.7561
DMF	SBPA	Catalyst_solvent	3,3,5-trimethylheptane	007154-80-5	35.3097	38.7574
DEF	SBPA	Extraction_solvent	cyanodiethylmethane	000617-80-1	28.5425	38.7588
DMF	SBPA	Catalyst_solvent	cycloheptane	000291-64-5	35.2254	38.7638
DMF	SBPA	Catalyst_solvent	2,6-dimethyloctane	002051-30-1	35.2546	38.7638
DMF	SBPA	Catalyst_solvent	triethylborane	000097-94-9	35.2044	38.7673
DMF	SBPA	Catalyst_solvent	ethylcyclohexane	001678-91-7	35.2259	38.7673
DMF	SBPA	Catalyst_solvent	3-ethylhexane	000619-99-8	35.0785	38.7703
DMF	SBPA	Catalyst_solvent	4-methyldecane	002847-72-5	35.2518	38.7711
DMF	SBPA	Catalyst_solvent	2,2-dimethylheptane	001071-26-7	35.2583	38.7727
DMF	SBPA	Catalyst_solvent	cis-1,2-dimethylcyclohexane	000583-57-3	35.297	38.7745
DMF	SBPA	Catalyst_solvent	2-methylheptane	000592-27-8	35.1215	38.7755
DMF	SBPA	Catalyst_solvent	propylcyclopentane	002040-96-2	35.2392	38.7776
DMF	SBPA	Catalyst_solvent	trans-1,3-dimethylcyclopentane	001759-58-6	35.2157	38.7776
DMF	SBPA	Catalyst_solvent	n-nonane	000111-84-2	35.1377	38.7789
DMF	SBPA	Catalyst_solvent	4,4-dimethylheptane	001068-19-5	35.2368	38.7852
DMF	SBPA	Catalyst_solvent	isopropylcyclohexane	000696-29-7	35.2858	38.7856
DMF	SBPA	Catalyst_solvent	n-undecane	001120-21-4	35.2367	38.7856
DMF	SBPA	Catalyst_solvent	4-methylheptane	000589-53-7	35.1189	38.7881
DMF	SBPA	Catalyst_solvent	2-methylpentane	000107-83-5	35.0514	38.7908
DMF	SBPA	Catalyst_solvent	2,3-dimethyloctane	007146-60-3	35.2194	38.7919
DMF	SBPA	Catalyst_solvent	2,5-dimethylhexane	000592-13-2	35.1922	38.7919
DMF	SBPA	Catalyst_solvent	2,4-dimethyloctane	004032-94-4	35.293	38.7929
DMF	SBPA	Catalyst_solvent	3-methyl-hexane	000589-34-4	35.0759	38.7946
DMF	SBPA	Catalyst_solvent	trans-1,2-dimethylcyclopentane	000822-50-4	35.2545	38.7982
DMF	SBPA	Catalyst_solvent	n-hexylcyclopentane	004457-00-5	35.3349	38.7982
DMF	SBPA	Catalyst_solvent	seleniumhexafluoride	007783-79-1	34.0663	38.7999
DMF	SBPA	Catalyst_solvent	perfluoroheptane	000335-57-9	34.2784	38.7999
DMF	SBPA	Catalyst_solvent	3,3-dimethylhexane	000563-16-6	35.2043	38.801
DMF	SBPA	Catalyst_solvent	2,6-dimethyl-heptane	001072-05-5	35.2222	38.8015
DMF	SBPA	Catalyst_solvent	3,5-dimethylheptane	000926-82-9	35.2421	38.8018
DMF	SBPA	Catalyst_solvent	2,2-dimethyloctane	015869-87-1	35.2997	38.8018
DMF	SBPA	Catalyst_solvent	3-ethylpentane	000617-78-7	35.0782	38.8027
DMF	SBPA	Catalyst_solvent	2,4-dimethylhexane	000589-43-5	35.2158	38.8049
DMF	SBPA	Catalyst_solvent	cyclohexane	000110-82-7	35.1128	38.8056
DMF	SBPA	Catalyst_solvent	2,3-dimethylhexane	000584-94-1	35.1412	38.8056
DMF	SBPA	Catalyst_solvent	cis-1,3-dimethylcyclohexane	000591-21-9	35.3033	38.8071
DMF	SBPA	Catalyst_solvent	1,3,5,7-tetramethyladamantane	001687-36-1	35.8378	38.8107
DMF	SBPA	Catalyst_solvent	3,4-dimethylhexane	000583-48-2	35.1425	38.8246
DMF	SBPA	Catalyst_solvent	2,4,4-trimethylhexane	016747-30-1	35.2783	38.8267
DMF	SBPA	Catalyst_solvent	3-ethyl-2-methylhexane	016789-46-1	35.232	38.8267
DMF	SBPA	Catalyst_solvent	tricyclo(5-2-1-0)decane	006004-38-2	35.5771	38.8311
DMF	SBPA	Catalyst_solvent	2,2,5-trimethylhexane	003522-94-9	35.3032	38.8352
DMF	SBPA	Catalyst_solvent	1a,2a,4b-1,2,4-trimethylcyclopentane	004850-28-6	35.2784	38.8399
DMF	SBPA	Catalyst_solvent	3-ethyl-2,2-dimethyl-pentane	016747-32-3	35.301	38.8403
DMF	SBPA	Catalyst_solvent	2,2-dimethylhexane	000590-73-8	35.2258	38.8429
DMF	SBPA	Catalyst_solvent	cis-1,4-dimethylcyclohexane	000589-90-2	35.3068	38.853
DMF	SBPA	Catalyst_solvent	2,5-dimethyloctane	015869-89-3	35.248	38.8561
DMF	SBPA	Catalyst_solvent	3-ethyl-4-methylhexane	003074-77-9	35.2668	38.8605
DMF	SBPA	Catalyst_solvent	pentylcyclohexane	004292-92-6	35.3332	38.8634
DMF	SBPA	Catalyst_solvent	perfluoromethylcyclohexane	000355-02-2	34.3136	38.8641
DMF	SBPA	Catalyst_solvent	cis-1-ethyl-2-methylcyclohexane	004923-77-7	35.2946	38.8678
DMF	SBPA	Catalyst_solvent	2,4-dimethylpentane	000108-08-7	35.1771	38.8691
DMF	SBPA	Catalyst_solvent	ethylcyclopentane	001640-89-7	35.2048	38.8691
DMF	SBPA	Catalyst_solvent	(z)-1,2-dimethylcyclopentane	001192-18-3	35.2533	38.8765
DMF	SBPA	Catalyst_solvent	1,1,3-trimethylcyclopentane	004516-69-2	35.3195	38.8766
DMF	SBPA	Catalyst_solvent	tetrachlorosilane	010026-04-7	35.2031	38.8789
DMF	SBPA	Catalyst_solvent	3-ethyl-3-methylhexane	003074-76-8	35.2432	38.8799
DMF	SBPA	Catalyst_solvent	4-methyl-nonane	017301-94-9	35.1983	38.8804
DMF	SBPA	Catalyst_solvent	2,3,4-trimethylpentane	000565-75-3	35.2229	38.8804
DMF	SBPA	Catalyst_solvent	1,8-nonadiene	004900-30-5	38.4488	38.894
DMF	SBPA	Catalyst_solvent	methylcyclohexane	000108-87-2	35.2205	38.8963
DMF	SBPA	Catalyst_solvent	2,2-dimethylpentane	000590-35-2	35.1971	38.8963
DMF	SBPA	Catalyst_solvent	2,2,3-trimethylpentane	000564-02-3	35.3034	38.899
DMF	SBPA	Catalyst_solvent	2,3,3-trimethylpentane	000560-21-4	35.2517	38.899
DMF	SBPA	Catalyst_solvent	4-methyloctane	002216-34-4	35.1684	38.9063
DMF	SBPA	Catalyst_solvent	2-methylhexane	000591-76-4	35.0896	38.9075
DMF	SBPA	Catalyst_solvent	(z)-1,3-dimethylcyclopentane	002532-58-3	35.2271	38.9078
DMF	SBPA	Catalyst_solvent	trans-2-nonene	006434-78-2	36.0565	38.9361
DMF	SBPA	Catalyst_solvent	perfluoro-n-hexane	000355-42-0	34.2604	38.938
DMF	SBPA	Catalyst_solvent	(e)-2-decene	020063-97-2	36.0226	38.9431
DMF	SBPA	Catalyst_solvent	perfluorocyclohexane	000355-68-0	34.2828	38.9443
DMF	SBPA	Catalyst_solvent	3,3-dimethylpentane	000562-49-2	35.1682	38.9476
DMF	SBPA	Catalyst_solvent	1,2,4-trimethyl-3-ethylbenzene	061827-87-0	39.5469	38.9505
DMF	SBPA	Catalyst_solvent	2,3-dimethylbutane	000079-29-8	35.1337	38.9712
DMF	SBPA	Catalyst_solvent	1-pentylcyclopentene	004291-98-9	36.0039	38.9712
DMF	SBPA	Catalyst_solvent	tetrachlorogermane	010038-98-9	35.134	38.9717
DMF	SBPA	Catalyst_solvent	trans-3-nonene	020063-92-7	35.9727	38.9824
DEF	SBPA	Extraction_solvent	4-methylpentanitrile	000542-54-1	28.8052	38.9856
DMF	SBPA	Catalyst_solvent	cis-2-decene	020348-51-0	36.1613	38.9879
DMF	SBPA	Catalyst_solvent	cis-2-nonene	006434-77-1	36.2105	38.9898
DMF	SBPA	Catalyst_solvent	nonafluoro(trifluoromethyl)-cyclopentane	001805-22-7	34.4289	38.9908
DMF	SBPA	Catalyst_solvent	1,4-cyclooctadiene	001073-07-0	38.5406	38.9915
DMF	SBPA	Catalyst_solvent	1-cis-2-trans-3-trimethylcyclopentane	015890-40-1	35.2732	38.9985
DMF	SBPA	Catalyst_solvent	1,1-dimethylcyclohexane	000590-66-9	35.3904	39.0036
DMF	SBPA	Catalyst_solvent	1-decene	000872-05-9	36.2634	39.0036
DMF	SBPA	Catalyst_solvent	ethylcyclobutane	004806-61-5	35.1882	39.0038
DMF	SBPA	Catalyst_solvent	trimethylboron	000593-90-8	35.2446	39.0038
DMF	SBPA	Catalyst_solvent	1a,2a,4a-1,2,4-trimethylcyclopentane	002613-72-1	35.2807	39.004
DMF	SBPA	Catalyst_solvent	adamantane	000281-23-2	35.3816	39.0052
DMF	SBPA	Catalyst_solvent	1-undecene	000821-95-4	36.2301	39.0052
DMF	SBPA	Catalyst_solvent	2-methyl-3-heptene	017618-76-7	35.9877	39.0141
DMF	SBPA	Catalyst_solvent	3-methyleneheptane	001632-16-2	36.2603	39.0206
DMF	SBPA	Catalyst_solvent	2,2,3-trimethyl-butane	000464-06-2	35.2693	39.0211
DMF	SBPA	Catalyst_solvent	undecanal	000112-44-7	46.1592	39.0274
DMF	SBPA	Catalyst_solvent	1,2-dichloro-1,2,3,3,4,4-hexafluorocyclobutane	000356-18-3	36.8947	39.0274
DMF	SBPA	Catalyst_solvent	2,2,3-trimethylhexane	016747-25-4	35.322	39.0299
DMF	SBPA	Catalyst_solvent	2-methyl-1-octene	004588-18-5	36.3661	39.0305
DMF	SBPA	Catalyst_solvent	2,2,3,3-tetramethylbutane	000594-82-1	35.4134	39.0305
DMF	SBPA	Catalyst_solvent	2,6-dimethyl-2-octene	004057-42-5	36.1476	39.0323
DMF	SBPA	Catalyst_solvent	2,3,4-trimethyl-2-pentene	000565-77-5	36.0148	39.0349
DMF	SBPA	Catalyst_solvent	cis-1-ethyl-2-methylcyclopentane	000930-89-2	35.2529	39.0351
DMF	SBPA	Catalyst_solvent	tetraethylsilane	000631-36-7	35.2229	39.04
DMF	SBPA	Catalyst_solvent	2,2,3,3-tetramethylpentane	007154-79-2	35.3955	39.0436
DMF	SBPA	Catalyst_solvent	2-methyl-1-nonene	002980-71-4	36.3031	39.0436
DMF	SBPA	Catalyst_solvent	cis-4-octene	007642-15-1	36.1735	39.0448
DMF	SBPA	Catalyst_solvent	1a,2a,3b-1,2,3-trimethylcyclohexane	007667-55-2	35.3487	39.0448
DMF	SBPA	Catalyst_solvent	1-ethyl-1-methylcyclohexane	004926-90-3	35.3662	39.0449
DMF	SBPA	Catalyst_solvent	1-nonene	000124-11-8	36.1945	39.0449
DMF	SBPA	Catalyst_solvent	pentaethylbenzene	000605-01-6	37.5706	39.045
DMF	SBPA	Catalyst_solvent	2-methyl-2-heptene	000627-97-4	35.9797	39.045
DMF	SBPA	Catalyst_solvent	cis-2-dodecene	007206-26-0	36.1175	39.054
DMF	SBPA	Catalyst_solvent	1-methyl-3-propylcyclohexane	004291-80-9	35.3461	39.054
DMF	SBPA	Catalyst_solvent	2,3-dimethylbicyclo(2-2-1)hept-2-ene	000529-16-8	36.2755	39.0619
DMF	SBPA	Catalyst_solvent	3-methylpentane	000096-14-0	35.043	39.0621
DMF	SBPA	Catalyst_solvent	cyclooctane	000292-64-8	35.3409	39.0642
DMF	SBPA	Catalyst_solvent	2,3,4-trimethylhexane	000921-47-1	35.2567	39.0671
DMF	SBPA	Catalyst_solvent	(3-methylbutyl)benzene	002049-94-7	39.9525	39.0817
DMF	SBPA	Catalyst_solvent	3,4-dimethyl-1-hexene	016745-94-1	36.1203	39.094
DMF	SBPA	Catalyst_solvent	7-methyl-1-octene	013151-06-9	36.4134	39.1011
DMF	SBPA	Catalyst_solvent	1,1,2-trimethylcyclohexane	007094-26-0	35.4517	39.1041
DMF	SBPA	Catalyst_solvent	1-dodecene	000112-41-4	36.1983	39.1049
DMF	SBPA	Catalyst_solvent	1-isopropyl-4-methylcyclohexane	000099-82-1	35.3675	39.1049
DMF	SBPA	Catalyst_solvent	2,3-dimethylpentane	000565-59-3	35.1682	39.1057
DMF	SBPA	Catalyst_solvent	4-methyl-1-heptene	013151-05-8	36.2822	39.108
DMF	SBPA	Catalyst_solvent	1-methyladamantane	000768-91-2	35.5024	39.1102
DMF	SBPA	Extraction_solvent	n-ethyl-1-propanamine	020193-20-8	29.5815	39.1104
DMF	SBPA	Catalyst_solvent	1a,2b,4a-1,2,4-trimethylcyclohexane	007667-60-9	35.3944	39.1105
DMF	SBPA	Extraction_solvent	3,4-dihydro-2h-1-benzopyran-2-one	000119-84-6	27.181	39.1139
DMF	SBPA	Catalyst_solvent	2,4-dimethylheptane	002213-23-2	35.2258	39.1169
DMF	SBPA	Catalyst_solvent	2,2,4,4-tetramethylpentane	001070-87-7	35.4322	39.1215
DMF	SBPA	Catalyst_solvent	octene	000111-66-0	36.4165	39.1215
DMF	SBPA	Catalyst_solvent	2,5-dimethylheptane	002216-30-0	35.2056	39.1232
DMF	SBPA	Catalyst_solvent	bicyclo(3-2-2)non-6-ene	007124-86-9	36.4361	39.1259
DMF	SBPA	Catalyst_solvent	cis-5,5-dimethyl-2-hexene	039761-61-0	36.153	39.1302
DMF	SBPA	Catalyst_solvent	2,5-dimethyl-2-hexene	003404-78-2	36.1861	39.1324
DEF	SBPA	Extraction_solvent	1,1-dichloro-1,2,2-trifluoroethane	000812-04-4	24.1018	39.1334
DMF	SBPA	Catalyst_solvent	1,1,2-trimethylcyclopentane	004259-00-1	35.3956	39.1347
DMF	SBPA	Catalyst_solvent	3-methyl-1-hexene	003404-61-3	36.4406	39.1373
DMF	SBPA	Catalyst_solvent	isopropylbutadecanoate	000110-27-0	40.0653	39.1373
DMF	SBPA	Catalyst_solvent	1-methylcycloheptene	001453-25-4	36.3817	39.1428
DMF	SBPA	Catalyst_solvent	1a,3a,5b-trimethylcyclohexane	001795-26-2	35.4182	39.1429
DMF	SBPA	Catalyst_solvent	2,3-dimethyl-1-hexene	016746-86-4	36.3799	39.1429
DMF	SBPA	Catalyst_solvent	2,4,6-trimethylheptane	002613-61-8	35.3322	39.1505
DMF	SBPA	Catalyst_solvent	n-heptylcyclopentane	005617-42-5	35.3762	39.1512
DMF	SBPA	Catalyst_solvent	n,n-dipentyl-1-pentanamine	000621-77-2	41.7072	39.1514
DMF	SBPA	Catalyst_solvent	3-carene	013466-78-9	36.6466	39.1514
DMF	SBPA	Catalyst_solvent	cis-2-heptene	006443-92-1	36.1917	39.1557
DMF	SBPA	Catalyst_solvent	isobutylcyclohexane	001678-98-4	35.3588	39.1557
DMF	SBPA	Catalyst_solvent	p-(t-butyl)toluene	000098-51-1	39.8156	39.1562
DMF	SBPA	Catalyst_solvent	3-ethyl-2-methyl-1-pentene	019780-66-6	36.3022	39.1576
DEF	SBPA	Extraction_solvent	1,2-dichlorohexane	002162-92-7	26.845	39.1617
DMF	SBPA	Catalyst_solvent	1-ethylcyclopentene	002146-38-5	36.1821	39.1712
DMF	SBPA	Catalyst_solvent	1-methyl-2-propylcyclohexane	004291-79-6	35.3259	39.1765
DMF	SBPA	Catalyst_solvent	2,3-dimethyl-2-pentene	010574-37-5	36.1026	39.1765
DMF	SBPA	Catalyst_solvent	(2-methylbutyl)benzene	003968-85-2	39.6454	39.1844
DMF	SBPA	Catalyst_solvent	difluorodiazene-cis	013812-43-6	39.6677	39.1844
DMF	SBPA	Catalyst_solvent	1,2-dimethyl-cyclopentene	000765-47-9	36.2009	39.1864
DMF	SBPA	Catalyst_solvent	dodecafluoro-hex-1-ene	000755-25-9	34.6602	39.1907
DMF	SBPA	Catalyst_solvent	pentafluoro(trifluoromethyl)sulfur	000373-80-8	34.7117	39.1907
DMF	SBPA	Catalyst_solvent	trans-4-methyl-2-hexene	003683-22-5	35.9793	39.193
DMF	SBPA	Catalyst_solvent	4,5-dimethyl-1-hexene	016106-59-5	36.4063	39.1961
DMF	SBPA	Catalyst_solvent	1-ethyl-1-methylcyclopentane	016747-50-5	35.3363	39.1972
DMF	SBPA	Catalyst_solvent	4-ethyl-1,2-dimethylbenzene	000934-80-5	39.9184	39.2017
DMF	SBPA	Catalyst_solvent	3-ethyl-3-methylpentane	001067-08-9	35.1783	39.2082
DMF	SBPA	Catalyst_solvent	methylcyclopentane	000096-37-7	35.2058	39.2082
DMF	SBPA	Catalyst_solvent	2,2,6-trimethylheptane	001190-83-6	35.3499	39.2087
DMF	SBPA	Catalyst_solvent	5,5-dimethyl-1-hexene	007116-86-1	36.3755	39.2145
DMF	SBPA	Catalyst_solvent	1-ethyl-2-isopropylbenzene	018970-44-0	39.8492	39.2195
DMF	SBPA	Catalyst_solvent	methylbutane	000078-78-4	35.0145	39.221
DMF	SBPA	Catalyst_solvent	trans-2-methyl-3-hexene	000692-24-0	36.0294	39.2274
DMF	SBPA	Catalyst_solvent	trans-5-methyl-2-hexene	007385-82-2	36.051	39.2297
DMF	SBPA	Catalyst_solvent	pinane	000473-55-2	35.5372	39.2356
DMF	SBPA	Catalyst_solvent	bicyclo[2,2,2]octane	000280-33-1	35.3132	39.2389
DEF	SBPA	Extraction_solvent	1,4-dibromobutane	000110-52-1	26.5722	39.2429
DMF	SBPA	Catalyst_solvent	cis-3-octene	000592-98-3	36.1817	39.2432
DMF	SBPA	Catalyst_solvent	trans-3,4-dimethyl-2-pentene	004914-92-5	36.1874	39.2465
DMF	SBPA	Catalyst_solvent	3-ethyl-2-pentene	000816-79-5	36.126	39.2575
DMF	SBPA	Catalyst_solvent	2,3,6-trimethylheptane	004032-93-3	35.2869	39.2624
DMF	SBPA	Catalyst_solvent	pentafluoro(trifluoromethyl)benzene	000434-64-0	36.0835	39.2658
DEF	SBPA	Extraction_solvent	oxalylchloride	000079-37-8	17.1084	39.2696
DMF	SBPA	Catalyst_solvent	1-ethylcyclohexene	001453-24-3	36.2382	39.2704
DMF	SBPA	Catalyst_solvent	bicyclohexyl	000092-51-3	35.5029	39.2818
DMF	SBPA	Catalyst_solvent	2,5,5-trimethylheptane	001189-99-7	35.3169	39.2925
DMF	SBPA	Catalyst_solvent	bicyclo(3,3,0)octane	000694-72-4	35.3881	39.2939
DMF	SBPA	Catalyst_solvent	pentane	000109-66-0	34.9565	39.2954
DMF	SBPA	Catalyst_solvent	(1-methylbutyl)benzene	002719-52-0	39.9475	39.2993
DMF	SBPA	Catalyst_solvent	2,4,4-trimethylheptane	004032-92-2	35.3106	39.3005
DMF	SBPA	Catalyst_solvent	tricyclo[2,2,1,0(2,6)]heptane	000279-19-6	36.1749	39.3092
DMF	SBPA	Catalyst_solvent	n,n-dioctyl-1-octanamine	001116-76-3	39.8347	39.3261
DMF	SBPA	Catalyst_solvent	4-methyl-1-hexene	003769-23-1	36.3939	39.3261
DMF	SBPA	Catalyst_solvent	tert-butylcyclohexane	003178-22-1	35.4183	39.3306
DMF	SBPA	Catalyst_solvent	isobutylcyclopentane	003788-32-7	35.3399	39.3338
DMF	SBPA	Catalyst_solvent	2,4-dimethyl-2-pentene	000625-65-0	36.2152	39.3357
DMF	SBPA	Catalyst_solvent	tetramantane	027745-90-0	35.8271	39.3378
DMF	SBPA	Catalyst_solvent	1,5-dimethylcyclopentene	016491-15-9	36.3971	39.3474
DMF	SBPA	Catalyst_solvent	3,3-dimethyloctane	004110-44-5	35.2633	39.3551
DMF	SBPA	Catalyst_solvent	1,1,3,3-tetramethylcyclopentane	050876-33-0	35.4784	39.3586
DMF	SBPA	Extraction_solvent	triethylamine	000121-44-8	9.1058	39.3619
DMF	SBPA	Catalyst_solvent	2,2-dimethylbutane	000075-83-2	35.1749	39.3676
DMF	SBPA	Catalyst_solvent	2-methyl-3-ethylpentane	000609-26-7	35.1401	39.3676
DMF	SBPA	Catalyst_solvent	di-n-octyl-terephthalate	004654-26-6	46.889	39.3736
DMF	SBPA	Catalyst_solvent	camphene	000079-92-5	37.0244	39.3736
DMF	SBPA	Catalyst_solvent	2,3-dimethyl-2-hexene	007145-20-2	36.0757	39.3902
DMF	SBPA	Catalyst_solvent	1,1'-oxybis2-methylpropane	000628-55-7	38.9117	39.3942
DMF	SBPA	Catalyst_solvent	3,4-dimethyl-1-pentene	007385-78-6	36.2991	39.4007
DMF	SBPA	Catalyst_solvent	(1-ethyl-1-methylpropyl)benzene	001985-97-3	39.5817	39.4007
DEF	SBPA	Extraction_solvent	1,3-dichloropropane	000142-28-9	27.1026	39.4034
DMF	SBPA	Catalyst_solvent	2,2,4-trimethylpentane	000540-84-1	35.2856	39.4084
DMF	SBPA	Catalyst_solvent	2,2,5,5-tetramethylhexane	001071-81-4	35.4386	39.4172
DEF	SBPA	Extraction_solvent	formicacidcyclohexylester	004351-54-6	30.9006	39.4303
DMF	SBPA	Catalyst_solvent	tri-n-butylamine	000102-82-9	45.3753	39.4305
DMF	SBPA	Catalyst_solvent	4-methylcyclohexene	000591-47-9	36.8463	39.4305
DEF	SBPA	Extraction_solvent	dichloroethenylmethylsilane	000124-70-9	24.8499	39.44
DMF	SBPA	Catalyst_solvent	2,2,3,4-tetramethylpentane	001186-53-4	35.3866	39.4543
DMF	SBPA	Catalyst_solvent	2,2-dimethyladamantane	019740-34-2	35.6485	39.4612
DEF	SBPA	Extraction_solvent	thiacyclobutane	000287-27-4	24.1286	39.4758
DMF	SBPA	Catalyst_solvent	1,1,2,3,4,4-hexachloro-1,3-butadiene	000087-68-3	37.6034	39.4778
DMF	SBPA	Catalyst_solvent	3-methylheptane	000589-81-1	35.1238	39.4943
DMF	SBPA	Catalyst_solvent	cyclopentane	000287-92-3	35.1637	39.4943
DMF	SBPA	Catalyst_solvent	(z)-2-pentene	000627-20-3	36.762	39.4987
DMF	SBPA	Catalyst_solvent	di-n-butylether	000142-96-1	43.1188	39.4987
DMF	SBPA	Catalyst_solvent	propylcyclopropane	002415-72-7	35.9928	39.4996
DMF	SBPA	Catalyst_solvent	2-ethyl-1,4-dimethylbenzene	001758-88-9	39.7962	39.5223
DMF	SBPA	Catalyst_solvent	(e)-4-octene	014850-23-8	36.0156	39.5253
DMF	SBPA	Catalyst_solvent	terpinolene	000586-62-9	37.7583	39.5253
DMF	SBPA	Catalyst_solvent	1-methyl-4-propylbenzene	001074-55-1	39.7623	39.5305
DMF	SBPA	Catalyst_solvent	methylcyclopentadienedimer	026472-00-4	37.6699	39.5446
DMF	SBPA	Catalyst_solvent	1-methyl-3-propyl-benzene	001074-43-7	39.8367	39.5505
DMF	SBPA	Catalyst_solvent	trans-3-octene	014919-01-8	36.009	39.5509
DMF	SBPA	Catalyst_solvent	1-methyl-4-(1-methylethyl)-1,4-cyclohexadiene	000099-85-4	37.7267	39.5509
DMF	SBPA	Catalyst_solvent	5-undecyne	002294-72-6	37.8413	39.5511
DMF	SBPA	Catalyst_solvent	methylcyclobutane	000598-61-8	35.1898	39.5663
DMF	SBPA	Catalyst_solvent	1,9-decadiene	001647-16-1	38.1175	39.5716
DEF	SBPA	Extraction_solvent	n-hexylacetate	000142-92-7	32.2722	39.5743
DMF	SBPA	Catalyst_solvent	1-fluorodecane	000334-56-5	37.9702	39.5811
DMF	SBPA	Catalyst_solvent	trichloroacetylchloride	000076-02-8	38.699	39.5847
DMF	SBPA	Catalyst_solvent	trans-2-hexene	004050-45-7	36.2897	39.5881
DMF	SBPA	Catalyst_solvent	trans-3-heptene	014686-14-7	36.0576	39.5905
DMF	SBPA	Catalyst_solvent	2,5-dimethyl-2,4-hexadiene	000764-13-6	38.045	39.5905
DMF	SBPA	Catalyst_solvent	1,3-dimethyladamantane	000702-79-4	35.6109	39.5935
DMF	SBPA	Catalyst_solvent	diethylsilane	000542-91-6	35.4973	39.5952
DMF	SBPA	Catalyst_solvent	3-ethyl-1-hexene	003404-58-8	36.3076	39.5986
DMF	SBPA	Catalyst_solvent	di-n-hexylether	000112-58-3	39.5763	39.5986
DMF	SBPA	Catalyst_solvent	2,2,4-trimethylhexane	016747-26-5	35.2997	39.6014
DMF	SBPA	Catalyst_solvent	bicyclo[3,3,1]nonane	000280-65-9	35.3477	39.6133
DMF	SBPA	Catalyst_solvent	5-decyne	001942-46-7	38.0928	39.6167
DMF	SBPA	Catalyst_solvent	2,2',3,3',4,4',5,5',6,6'-decafluorobiphenyl	000434-90-2	36.1219	39.617
DMF	SBPA	Catalyst_solvent	trans-decalin	000493-02-7	35.3968	39.6189
DMF	SBPA	Catalyst_solvent	3-methyl-cis-2-pentene	000922-62-3	36.3295	39.6189
DMF	SBPA	Catalyst_solvent	1-fluoroheptane	000661-11-0	39.2528	39.6204
DMF	SBPA	Catalyst_solvent	1-(2-propenyl)cyclohexene	013511-13-2	37.8942	39.6279
DMF	SBPA	Catalyst_solvent	3-decyne	002384-85-2	38.0977	39.6284
DMF	SBPA	Catalyst_solvent	1-methyl-4-(1-methylethyl)-1,3-cyclohexadiene	000099-86-5	37.9264	39.6323
DMF	SBPA	Catalyst_solvent	1,2,3,5-tetraethylbenzene	038842-05-6	37.8897	39.6337
DMF	SBPA	Catalyst_solvent	2-methyl-2-pentene	000625-27-4	36.3617	39.6361
DMF	SBPA	Catalyst_solvent	2,2,3,3-tetramethylhexane	013475-81-5	35.411	39.6361
DMF	SBPA	Catalyst_solvent	2-methyl-5-(1-methylethyl)-1,3-cyclohexadiene	000099-83-2	38.2211	39.6384
DMF	SBPA	Catalyst_solvent	tetramethylsilane	000075-76-3	35.54	39.6504
DMF	SBPA	Catalyst_solvent	quadricyclane	000278-06-8	38.2293	39.6605
DMF	SBPA	Catalyst_solvent	1,2,3-triethylbenzene	042205-08-3	38.8397	39.6624
DMF	SBPA	Catalyst_solvent	3,4-dimethylpent-2-ene	024910-63-2	36.175	39.6624
DMF	SBPA	Catalyst_solvent	cis-3-hexene	000592-47-2	36.3953	39.6648
DMF	SBPA	Catalyst_solvent	trans-2-octene	013389-42-9	36.104	39.6667
DMF	SBPA	Catalyst_solvent	1,3,5-triisopropylbenzene	000717-74-8	38.1997	39.6667
DEF	SBPA	Extraction_solvent	butylformate	000592-84-7	26.454	39.6728
DMF	SBPA	Catalyst_solvent	bicyclo(3-3-3)undecane	029415-95-0	35.5221	39.6739
DMF	SBPA	Catalyst_solvent	pbr3	007789-60-8	37.1801	39.6836
DMF	SBPA	Catalyst_solvent	isopropylcyclopropane	003638-35-5	36.0445	39.6839
DMF	SBPA	Catalyst_solvent	1-chlorononane	002473-01-0	38.7753	39.6894
DMF	SBPA	Catalyst_solvent	1-(ethenyloxy)decane	000765-05-9	38.228	39.6955
DMF	SBPA	Catalyst_solvent	trans-3-hexene	013269-52-8	36.1515	39.7125
DMF	SBPA	Catalyst_solvent	n-octylbenzene	002189-60-8	38.5393	39.7125
DMF	SBPA	Catalyst_solvent	norbornane	000279-23-2	35.3816	39.7227
DMF	SBPA	Catalyst_solvent	diamantane	002292-79-7	35.5256	39.7229
DMF	SBPA	Extraction_solvent	hexanedinitrile	000111-69-3	27.7937	39.7284
DMF	SBPA	Catalyst_solvent	1,1,2,2-tetrachloro-1,2-difluoro-ethane	000076-12-0	37.3787	39.7286
DMF	SBPA	Catalyst_solvent	4-octyne	001942-45-6	38.7927	39.7459
DMF	SBPA	Catalyst_solvent	1,3,5-triethylbenzene	000102-25-0	38.3213	39.7459
DMF	SBPA	Catalyst_solvent	cs2	000075-15-0	35.8209	39.752
DMF	SBPA	Catalyst_solvent	3-octyne	015232-76-5	38.8515	39.7578
DMF	SBPA	Catalyst_solvent	trans-2-heptene	014686-13-6	36.1749	39.7777
DMF	SBPA	Catalyst_solvent	5-ethylidene-2-norbornene	016219-75-3	38.7736	39.7777
DMF	SBPA	Catalyst_solvent	2,2-difluorotetrachloroethane	000076-11-9	37.5865	39.7793
DMF	SBPA	Catalyst_solvent	dimethylsilylether	003277-26-7	37.6005	39.7793
DMF	SBPA	Catalyst_solvent	neopentylbenzene	001007-26-7	39.972	39.7885
DMF	SBPA	Catalyst_solvent	1-(1,1-dimethylethyl)-3-methylbenzene	001075-38-3	39.8663	39.7973
DMF	SBPA	Catalyst_solvent	1,4-bis(1,1-dimethylethyl)-benzene	001012-72-2	38.908	39.801
DMF	SBPA	Catalyst_solvent	tricyclo(4,1,0,2,4)heptane	000187-26-8	38.1434	39.805
DMF	SBPA	Catalyst_solvent	bromotrichloromethane	000075-62-7	37.872	39.8075
DMF	SBPA	Catalyst_solvent	n-heptylbenzene	001078-71-3	38.8538	39.8098
DMF	SBPA	Catalyst_solvent	trans-anti-trans-tetra-decahydroanthracene	028071-99-0	35.6384	39.8144
DMF	SBPA	Catalyst_solvent	di-n-pentylether	000693-65-2	41.3471	39.8226
DMF	SBPA	Catalyst_solvent	methylnorbornene	000694-92-8	36.6164	39.8226
DMF	SBPA	Catalyst_solvent	dicyclopentadiene	000077-73-6	38.0729	39.8269
DMF	SBPA	Catalyst_solvent	pentafluoropyridine	000700-16-3	38.173	39.827
DMF	SBPA	Catalyst_solvent	chlorotriethylsilane	000994-30-9	38.2126	39.827
DMF	SBPA	Catalyst_solvent	2-nonyne	019447-29-1	38.9486	39.8296
DMF	SBPA	Catalyst_solvent	3-(chloromethyl)heptane	000123-04-6	38.8184	39.8404
DMF	SBPA	Catalyst_solvent	1,1,3-trimethylcyclohexane	003073-66-3	35.4695	39.8497
DMF	SBPA	Catalyst_solvent	bicyclo(4,1,0)heptane	000286-08-8	35.9555	39.8586
DMF	SBPA	Catalyst_solvent	2-butynedinitrile	001071-98-3	35.9581	39.8586
DMF	SBPA	Catalyst_solvent	1-vinylcyclohexene	002622-21-1	39.055	39.871
DMF	SBPA	Catalyst_solvent	1,2,3,4,5,5-hexachloro-1,3-cyclopentadiene	000077-47-4	38.8131	39.8754
DMF	SBPA	Catalyst_solvent	2-methyl-1-pentene	000763-29-1	36.8389	39.8802
DMF	SBPA	Catalyst_solvent	bbr3	010294-33-4	35.7378	39.8802
DMF	SBPA	Catalyst_solvent	pentachlorofluoroethane	000354-56-3	37.9686	39.8855
DMF	SBPA	Catalyst_solvent	1-ethyl-3,5-dimethylbenzene	000934-74-7	39.3296	39.8896
DMF	SBPA	Catalyst_solvent	trichloroacetonitrile	000545-06-2	39.3332	39.8896
DMF	SBPA	Catalyst_solvent	octadiene	003710-30-3	38.9556	39.8915
DMF	SBPA	Catalyst_solvent	methylenecyclopentane	001528-30-9	37.351	39.8995
DEF	SBPA	Extraction_solvent	2-chloro-1,3-butadiene	000126-99-8	20.5241	39.9057
DMF	SBPA	Catalyst_solvent	1,1'-thiobis2-methylpropane	000592-65-4	39.0626	39.9061
DMF	SBPA	Catalyst_solvent	2,2,4-trimethyl-2-pentene	000107-40-4	36.2165	39.9128
DMF	SBPA	Catalyst_solvent	1,4-bis(1-methylethyl)-benzene	000100-18-5	39.1839	39.9128
DMF	SBPA	Catalyst_solvent	cyclotetradecane	000295-17-0	35.814	39.9134
DMF	SBPA	Catalyst_solvent	3-heptyne	002586-89-2	39.4599	39.9175
DMF	SBPA	Catalyst_solvent	cyclododecane	000294-62-2	35.7636	39.9204
DMF	SBPA	Catalyst_solvent	pentylbenzene	000538-68-1	39.6512	39.9208
DMF	SBPA	Catalyst_solvent	8-methyl-1-nonene	026741-24-2	36.3453	39.9208
DMF	SBPA	Catalyst_solvent	2-octyne	002809-67-8	39.5147	39.9231
DMF	SBPA	Catalyst_solvent	2,5-dimethyl-1,5-hexadiene	000627-58-7	39.2129	39.9237
DMF	SBPA	Catalyst_solvent	1,2-dimethylcyclohexene	001674-10-8	36.2299	39.9237
DMF	SBPA	Catalyst_solvent	myrcene	000123-35-3	39.5432	39.924
DMF	SBPA	Catalyst_solvent	1-(1,1-dimethylethyl)-3,5-dimethylbenzene	000098-19-1	39.0086	39.9272
DMF	SBPA	Catalyst_solvent	triethylsilane	000617-86-7	35.4033	39.9276
DMF	SBPA	Catalyst_solvent	2-chlorooctane	000628-61-5	39.1678	39.9277
DMF	SBPA	Catalyst_solvent	hexylbenzene	001077-16-3	39.1895	39.9281
DMF	SBPA	Catalyst_solvent	tridecanal	010486-19-8	43.0183	39.9365
DMF	SBPA	Catalyst_solvent	bicyclo(2,2,2)oct-2-ene	000931-64-6	36.7544	39.9365
DMF	SBPA	Catalyst_solvent	2,2'-thiobisbutane	000626-26-6	39.3055	39.9411
DMF	SBPA	Catalyst_solvent	vinylnorbornene	003048-64-4	39.3236	39.9417
DMF	SBPA	Catalyst_solvent	(z)-4,4-dimethyl-2-pentene	000762-63-0	36.2356	39.9417
DMF	SBPA	Catalyst_solvent	cyclodecane	000293-96-9	35.5516	39.9437
DMF	SBPA	Catalyst_solvent	1,3-bis(1-methylethyl)-benzene	000099-62-7	39.2747	39.9532
DMF	SBPA	Catalyst_solvent	3-methyl-2-hexene	017618-77-8	36.2356	39.9532
DEF	SBPA	Extraction_solvent	1-chloro-4-(trifluoromethyl)-benzene	000098-56-6	25.7781	39.9602
DMF	SBPA	Catalyst_solvent	2,2,4,6,6-pentamethylheptane	013475-82-6	35.5825	39.9651
DMF	SBPA	Catalyst_solvent	1-ethyl-2,4,5-trimethylbenzene	017851-27-3	39.3672	39.9669
DMF	SBPA	Catalyst_solvent	cyclooctene	000931-88-4	36.6969	39.9688
DMF	SBPA	Catalyst_solvent	methyloleate	000112-62-9	41.784	39.9688
DMF	SBPA	Catalyst_solvent	sulfurdichloride	010545-99-0	36.1679	39.9733
DMF	SBPA	Catalyst_solvent	1-chlorooctane	000111-85-3	39.2167	39.9756
DMF	SBPA	Catalyst_solvent	cis-4-methyl-2-pentene	000691-38-3	36.4739	39.9769
DMF	SBPA	Catalyst_solvent	butylbenzene	000104-51-8	40.253	39.9769
DMF	SBPA	Catalyst_solvent	3-phenylpentane	001196-58-3	39.3693	39.9791
DMF	SBPA	Catalyst_solvent	1,2,3,4-tetrahydro-6,7-dimethylnaphthalene	001076-61-5	39.3236	39.987
DMF	SBPA	Catalyst_solvent	1,2-diisopropylbenzene	000577-55-9	39.3916	40.0004
DMF	SBPA	Catalyst_solvent	1-ethyl-4-(1-methylethyl)benzene	004218-48-8	39.4101	40.0117
DMF	SBPA	Catalyst_solvent	1,4-diethylbenzene	000105-05-5	39.6066	40.0193
DMF	SBPA	Catalyst_solvent	p-menth-4(8)-ene	001124-27-2	36.3253	40.0193
DMF	SBPA	Catalyst_solvent	2-methyl-3-hexyne	036566-80-0	39.1607	40.0198
DMF	SBPA	Catalyst_solvent	2-methyl-1,3-cyclohexadiene	001489-57-2	39.2169	40.0306
DMF	SBPA	Catalyst_solvent	1,2,3,5-tetramethylbenzene	000527-53-7	39.8363	40.0361
DMF	SBPA	Catalyst_solvent	2,4,4-trimethyl-1-pentene	000107-39-1	36.3943	40.0361
DEF	SBPA	Extraction_solvent	2-propanethiol	000075-33-2	12.1028	40.051
DMF	SBPA	Catalyst_solvent	1-ethyl-2,4-dimethylbenzene	000874-41-9	39.8953	40.057
DMF	SBPA	Catalyst_solvent	ethylidenecyclopentane	002146-37-4	36.4041	40.057
DMF	SBPA	Catalyst_solvent	4-methyl-3-heptene	004485-16-9	35.9113	40.0636
DMF	SBPA	Catalyst_solvent	hexadiynedinitrile	016419-78-6	35.9259	40.0636
DMF	SBPA	Catalyst_solvent	pentamethylbenzene	000700-12-9	39.1593	40.065
DMF	SBPA	Catalyst_solvent	tetrachlorothiophene	006012-97-1	37.5018	40.0697
DMF	SBPA	Catalyst_solvent	1,2,3,4-tetramethylbenzene	000488-23-3	40.1119	40.0882
DMF	SBPA	Catalyst_solvent	3,3-dimethyl-1-hexene	003404-77-1	36.4531	40.0882
DMF	SBPA	Catalyst_solvent	4-vinylcyclohexene	000100-40-3	39.5148	40.0999
DMF	SBPA	Catalyst_solvent	trans-2-pentene	000646-04-8	36.442	40.1026
DMF	SBPA	Catalyst_solvent	1-methyl-4-isopropylbenzene	000099-87-6	40.0956	40.1026
DMF	SBPA	Catalyst_solvent	nitrogentrichloride	010025-85-1	37.1863	40.1143
DMF	SBPA	Catalyst_solvent	2,3-dimethyl-2-butene	000563-79-1	36.4884	40.1171
DMF	SBPA	Catalyst_solvent	1-ethyl-4-methylbenzene	000622-96-8	40.4615	40.1171
DMF	SBPA	Catalyst_solvent	ethylidenecyclohexane	001003-64-1	36.4572	40.1182
DMF	SBPA	Catalyst_solvent	1,3,5-trimethylbenzene	000108-67-8	40.2191	40.1182
DMF	SBPA	Catalyst_solvent	1,2-diethylbenzene	000135-01-3	40.102	40.1196
DMF	SBPA	Catalyst_solvent	hexafluorobenzene	000392-56-3	35.7281	40.1205
DMF	SBPA	Catalyst_solvent	ethylcyclopropane	001191-96-4	36.1242	40.1207
DMF	SBPA	Catalyst_solvent	2,2'-oxybis-butane	006863-58-7	47.0514	40.1344
DMF	SBPA	Catalyst_solvent	beta-pinene	000127-91-3	37.0861	40.1344
DMF	SBPA	Catalyst_solvent	alpha-pinene	000080-56-8	36.5078	40.1385
DMF	SBPA	Catalyst_solvent	1,5-cyclooctadiene	000111-78-4	40.5595	40.1385
DMF	SBPA	Catalyst_solvent	(e)-3-methyl-2-pentene	000616-12-6	36.3549	40.1432
DMF	SBPA	Catalyst_solvent	1,3-diethylbenzene	000141-93-5	39.6588	40.1432
DMF	SBPA	Catalyst_solvent	perfluoronaphthalene	000313-72-4	36.3912	40.1455
DMF	SBPA	Catalyst_solvent	2-methyl-1-heptene	015870-10-7	36.4532	40.1458
DMF	SBPA	Catalyst_solvent	1-methyl-3-(1-methylethyl)-benzene	000535-77-3	40.1348	40.1458
DMF	SBPA	Catalyst_solvent	trans-2,2-dimethyl-3-hexene	000690-93-7	36.0618	40.1489
DMF	SBPA	Catalyst_solvent	isobutylbenzene	000538-93-2	40.2392	40.149
DMF	SBPA	Catalyst_solvent	2-ethyl-3-methyl-1-butene	007357-93-9	36.4725	40.149
DMF	SBPA	Catalyst_solvent	tetrachloroethene	000127-18-4	36.6509	40.1499
DMF	SBPA	Catalyst_solvent	bis(1,1-dimethylethyl)peroxide	000110-05-4	41.7555	40.1499
DMF	SBPA	Catalyst_solvent	m-ethyltoluene	000620-14-4	40.4775	40.1596
DMF	SBPA	Catalyst_solvent	2,3,3-trimethyl-1-pentene	000560-23-6	36.4965	40.1596
DMF	SBPA	Catalyst_solvent	2-ethyl-1-pentene	003404-71-5	36.4783	40.1624
DMF	SBPA	Catalyst_solvent	1-methyl-2-propylbenzene	001074-17-5	40.3988	40.1624
DMF	SBPA	Catalyst_solvent	p-tert-butylethylbenzene	007364-19-4	39.1646	40.168
DMF	SBPA	Catalyst_solvent	1,1-dimethylcyclopentane	001638-26-2	35.3688	40.1717
DMF	SBPA	Extraction_solvent	2,4-dimethylpyridine	000108-47-4	27.2216	40.1962
DMF	SBPA	Catalyst_solvent	1,2,3,4-tetramethylcyclohexane	003726-45-2	35.4411	40.1976
DMF	SBPA	Catalyst_solvent	bicyclo(2,1,0)pentane	000185-94-4	36.4079	40.1981
DMF	SBPA	Catalyst_solvent	1,2-hexadiene	000592-44-9	38.9946	40.2104
DMF	SBPA	Catalyst_solvent	butylvinylether	000111-34-2	41.8407	40.2204
DMF	SBPA	Catalyst_solvent	4,4-dimethylcyclohexene	014072-86-7	36.7085	40.2204
DMF	SBPA	Catalyst_solvent	2,3,3-trimethyl-1-butene	000594-56-9	36.7171	40.2234
DMF	SBPA	Catalyst_solvent	methyltetradecanoate	000124-10-7	41.8921	40.2234
DMF	SBPA	Catalyst_solvent	1-methyl-tetralin	001559-81-5	40.6063	40.2238
DMF	SBPA	Catalyst_solvent	bicyclo(3-3-1)non-2-ene	006671-66-5	36.5178	40.2238
DMF	SBPA	Catalyst_solvent	1,2,3-trimethylbenzene	000526-73-8	41.4483	40.2239
DMF	SBPA	Catalyst_solvent	2,5-dimethyl-1-hexene	006975-92-4	36.626	40.2239
DMF	SBPA	Catalyst_solvent	4-methyl-trans-2-pentene	000674-76-0	36.2479	40.2275
DMF	SBPA	Catalyst_solvent	trans,trans-2,4-hexadiene	005194-51-4	39.3381	40.2275
DMF	SBPA	Catalyst_solvent	1-ethyl-2,3-dimethylbenzene	000933-98-2	40.4476	40.2287
DMF	SBPA	Catalyst_solvent	1-methylcyclohexene	000591-49-1	36.4866	40.2287
DMF	SBPA	Catalyst_solvent	1,1,2-trimethylcyclopropane	004127-45-1	35.8102	40.2404
DMF	SBPA	Catalyst_solvent	1-methylcyclopentene	000693-89-0	36.5678	40.2461
DMF	SBPA	Catalyst_solvent	tetralin	000119-64-2	41.054	40.2461
DMF	SBPA	Catalyst_solvent	isopropylbenzene	000098-82-8	41.6386	40.248
DMF	SBPA	Catalyst_solvent	1-iodo-hexane	000638-45-9	40.9644	40.2516
DMF	SBPA	Catalyst_solvent	n,n,n',n'-tetraethylmethanediamine	000102-53-4	36.5435	40.2516
DMF	SBPA	Catalyst_solvent	1-heptene	000592-76-7	36.5352	40.2781
DMF	SBPA	Catalyst_solvent	1-methyl-2-isopropylbenzene	000527-84-4	40.7243	40.2781
DMF	SBPA	Catalyst_solvent	ethyltrichlorosilane	000115-21-9	38.9925	40.2786
DMF	SBPA	Catalyst_solvent	(1,1-dimethylethyl)benzene	000098-06-6	41.0584	40.2896
DMF	SBPA	Catalyst_solvent	2,4-dimethyl-1-pentene	002213-32-3	36.5807	40.2896
DMF	SBPA	Catalyst_solvent	benzene	000071-43-2	49.5078	40.2918
DMF	SBPA	Catalyst_solvent	2-methyl-2,4-hexadiene	028823-41-8	39.0102	40.2976
DMF	SBPA	Extraction_solvent	3-fluorobenzaldehyde	000456-48-4	26.2974	40.2985
DEF	SBPA	Extraction_solvent	cyclopentanethiol	001679-07-8	28.4771	40.2997
DMF	SBPA	Catalyst_solvent	1-methyl-2-ethylbenzene	000611-14-3	41.3215	40.3029
DMF	SBPA	Catalyst_solvent	3,3-dimethyl-1-pentene	003404-73-7	36.6091	40.3029
DMF	SBPA	Catalyst_solvent	3-methyl-1-pentene	000760-20-3	36.6102	40.3178
DMF	SBPA	Catalyst_solvent	1,4-cyclohexadiene	000628-41-1	41.3435	40.3178
DMF	SBPA	Catalyst_solvent	n-propylbenzene	000103-65-1	41.147	40.3178
DMF	SBPA	Catalyst_solvent	5-methyl-1-heptene	013151-04-7	36.585	40.3178
DMF	SBPA	Catalyst_solvent	1,4-dimethylbenzene	000106-42-3	41.7645	40.3205
DMF	SBPA	Catalyst_solvent	3-ethylcyclopentene	000694-35-9	36.6565	40.3205
DEF	SBPA	Extraction_solvent	difluoromethyl-2,2,2-trifluoroethylether	001885-48-9	27.7955	40.3277
DMF	SBPA	Catalyst_solvent	2-methyladamantane	000700-56-1	35.4812	40.3333
DMF	SBPA	Catalyst_solvent	3-hexyne	000928-49-4	40.4415	40.3372
DMF	SBPA	Catalyst_solvent	(e)-2-methyl-1,3-pentadiene	000926-54-5	39.4744	40.3429
DMF	SBPA	Catalyst_solvent	indane	000496-11-7	41.7065	40.3477
DMF	SBPA	Catalyst_solvent	4-methyl-1-pentene	000691-37-2	36.6437	40.3477
DMF	SBPA	Catalyst_solvent	diamylketone	000927-49-1	45.6734	40.364
DMF	SBPA	Catalyst_solvent	spiropentane	000157-40-4	36.8491	40.364
DMF	SBPA	Catalyst_solvent	1,2,3-trimethyl-4-ethylbenzene	061827-86-9	39.4837	40.3646
DMF	SBPA	Catalyst_solvent	2,3-dimethyl-1,3-butadiene	000513-81-5	38.9573	40.3649
DMF	SBPA	Catalyst_solvent	3,4,4-trimethyl-2-pentene	000598-96-9	36.1916	40.3649
DMF	SBPA	Extraction_solvent	3-(1,1-dimethylethyl)-2,2,4,4-tetrame-3-pentanol	041902-42-5	25.0553	40.3654
DMF	SBPA	Catalyst_solvent	pentafluorobenzonitrile	000773-82-0	40.0632	40.3744
DMF	SBPA	Catalyst_solvent	1,3-dimethylbenzene	000108-38-3	41.8271	40.3797
DMF	SBPA	Catalyst_solvent	bicyclo(4,2,1)non-3-ene	016456-33-0	36.6998	40.3797
DMF	SBPA	Catalyst_solvent	cyclohexylbenzene	000827-52-1	40.6513	40.4321
DMF	SBPA	Catalyst_solvent	2,3-dimethyl-1-pentene	003404-72-6	36.5304	40.4321
DMF	SBPA	Catalyst_solvent	heptafluoropropyl-methyl-ether	000375-03-1	38.0746	40.4332
DMF	SBPA	Extraction_solvent	3-methyl-2-butanone	000563-80-4	28.8172	40.4332
DMF	SBPA	Catalyst_solvent	ethylbenzene	000100-41-4	42.3866	40.4447
DMF	SBPA	Catalyst_solvent	1,1,2-trichloro-1,2,2-trifluoroethane	000076-13-1	36.7357	40.4447
DMF	SBPA	Catalyst_solvent	1-(1,1-dimethylethyl)-4-ethenylbenzene	001746-23-2	43.1114	40.4464
DMF	SBPA	Catalyst_solvent	3-methylcyclohexene	000591-48-0	36.7603	40.4464
DMF	SBPA	Catalyst_solvent	trans-1,4-hexadiene	007319-00-8	39.0554	40.4525
DEF	SBPA	Extraction_solvent	vinylacetate	000108-05-4	27.2014	40.4627
DMF	SBPA	Catalyst_solvent	1-chloroheptane	000629-06-1	39.7698	40.4664
DMF	SBPA	Catalyst_solvent	(z)-(1-methyl-1-propenyl)benzene	000767-99-7	42.3796	40.4683
DMF	SBPA	Catalyst_solvent	2-methyl-2-butene	000513-35-9	36.7344	40.4683
DMF	SBPA	Catalyst_solvent	1,4-hexadiene	000592-45-0	39.5264	40.4927
DMF	SBPA	Catalyst_solvent	3-methyl-4-methylenehexane	003404-67-9	36.2995	40.4927
DMF	SBPA	Catalyst_solvent	trans-2,2,4,6,6-pentamethyl-3-heptene	027656-49-1	35.8816	40.4962
DMF	SBPA	Catalyst_solvent	cyclopentene	000142-29-0	37.2589	40.5065
DMF	SBPA	Catalyst_solvent	1-ethyl-1-methylcyclopropane	053778-43-1	35.9511	40.5065
DMF	SBPA	Catalyst_solvent	2-hexyne	000764-35-2	41.3534	40.5148
DMF	SBPA	Catalyst_solvent	allylcyclohexane	002114-42-3	36.6166	40.5148
DMF	SBPA	Catalyst_solvent	1,2-dimethylbenzene	000095-47-6	43.1387	40.5214
DMF	SBPA	Catalyst_solvent	ethenyltrimethylsilane	000754-05-2	36.7673	40.5214
DMF	SBPA	Catalyst_solvent	2-methyl-1-butene	000563-46-2	37.1685	40.5389
DMF	SBPA	Catalyst_solvent	2,5-dimethyl-3-hexene	015910-22-2	35.943	40.5389
DMF	SBPA	Catalyst_solvent	triethylaluminum	000097-93-8	39.4065	40.5806
DMF	SBPA	Catalyst_solvent	2,3-dimethyl-1-butene	000563-78-0	36.7793	40.5921
DMF	SBPA	Catalyst_solvent	cyclohexyl-isocyanate	003173-53-3	43.5885	40.5921
DMF	SBPA	Catalyst_solvent	hexamethyldisiloxane	000107-46-0	36.9785	40.6027
DMF	SBPA	Catalyst_solvent	1-iodopropane	000107-08-4	46.5218	40.6027
DMF	SBPA	Catalyst_solvent	2,6,8-trimethyl-4-nonanone	000123-18-2	43.0453	40.6116
DMF	SBPA	Catalyst_solvent	allylcyclopentane	003524-75-2	36.7586	40.6116
DMF	SBPA	Catalyst_solvent	3-ethylcyclohexene	002808-71-1	36.608	40.6184
DMF	SBPA	Catalyst_solvent	1,3-cyclohexadiene	000592-57-4	41.2783	40.6184
DMF	SBPA	Catalyst_solvent	trimethylaluminum	000075-24-1	46.8914	40.6214
DMF	SBPA	Catalyst_solvent	1-methyl-4-methylenecyclohexane	002808-80-2	37.0362	40.6214
DMF	SBPA	Catalyst_solvent	methylenecyclobutane	001120-56-5	37.9445	40.6563
DMF	SBPA	Catalyst_solvent	1-(ethylthio)-octane	003698-94-0	39.4672	40.6657
DMF	SBPA	Catalyst_solvent	2,6-dimethyl-4-heptanone	000108-83-8	47.7228	40.6672
DMF	SBPA	Catalyst_solvent	methylenecyclohexane	001192-37-6	37.1639	40.6672
DMF	SBPA	Catalyst_solvent	2,6-octadiene	004974-27-0	37.7121	40.6872
DMF	SBPA	Catalyst_solvent	3-ethylstyrene	007525-62-4	44.5885	40.6938
DMF	SBPA	Catalyst_solvent	ethylnorbornene	015403-89-1	36.8182	40.6938
DMF	SBPA	Catalyst_solvent	2-methyl-1,4-pentadiene	000763-30-4	39.4892	40.6961
DMF	SBPA	Catalyst_solvent	pentene	000109-67-1	37.0647	40.7001
DMF	SBPA	Catalyst_solvent	trans-1-propenylbenzene	000873-66-5	47.0299	40.7001
DMF	SBPA	Catalyst_solvent	toluene	000108-88-3	44.5146	40.7143
DMF	SBPA	Catalyst_solvent	ccl4	000056-23-5	36.81	40.7143
DMF	SBPA	Catalyst_solvent	2,3-pentadiene	000591-96-8	38.9239	40.7144
DMF	SBPA	Catalyst_solvent	1,5-hexadiene	000592-42-7	40.757	40.7219
DMF	SBPA	Catalyst_solvent	(z)-2-hexene	007688-21-3	36.5366	40.7219
DMF	SBPA	Catalyst_solvent	trichlorosilane	010025-78-2	38.0498	40.7248
DMF	SBPA	Catalyst_solvent	chlorinemonoxide	007791-21-1	38.0612	40.7248
DMF	SBPA	Catalyst_solvent	2-ethylstyrene	007564-63-8	44.6322	40.7415
DMF	SBPA	Catalyst_solvent	n-methylpentafluorobenzene	000771-56-2	36.8201	40.7415
DMF	SBPA	Catalyst_solvent	1,1'-(1,1-me-3-meyl-1,3-prdiyl)-bisbenzene	006362-80-7	47.8511	40.7434
DMF	SBPA	Catalyst_solvent	2-norbornene	000498-66-8	37.1669	40.7434
DMF	SBPA	Catalyst_solvent	1-n-propylnaphthalene	002765-18-6	44.8499	40.7483
DMF	SBPA	Catalyst_solvent	2-carene	000554-61-0	36.83	40.7483
DMF	SBPA	Catalyst_solvent	5-methyl-1-hexene	003524-73-0	36.7446	40.7712
DMF	SBPA	Catalyst_solvent	2,6-diethylnaphthalene	059919-41-4	42.8462	40.7712
DMF	SBPA	Catalyst_solvent	tert-butylmethacrylate	000585-07-9	47.6396	40.7876
DMF	SBPA	Catalyst_solvent	1,2-pentadiene	000591-95-7	40.024	40.8106
DMF	SBPA	Catalyst_solvent	1,4-dimethylcyclopentene	019550-48-2	36.4347	40.8106
DMF	SBPA	Catalyst_solvent	3,3-dimethyl-1-butene	000558-37-2	36.8874	40.8179
DMF	SBPA	Catalyst_solvent	alpha-methylstyrene	000098-83-9	45.9378	40.8179
DMF	SBPA	Catalyst_solvent	guaiene	000088-84-6	36.8053	40.8215
DMF	SBPA	Catalyst_solvent	n,n-diethyl-benzeneamine	000091-66-7	44.3691	40.8215
DMF	SBPA	Catalyst_solvent	3-methyl-1,3-pentadiene	004549-74-0	38.7609	40.8674
DMF	SBPA	Catalyst_solvent	cbr4	000558-13-4	38.7611	40.8674
DMF	SBPA	Catalyst_solvent	2-ethyl-1-butene	000760-21-4	36.5409	40.8732
DMF	SBPA	Catalyst_solvent	3-methyl-1,4-pentadiene	001115-08-8	40.7987	40.8732
DMF	SBPA	Catalyst_solvent	3-methylstyrene	000100-80-1	46.8788	40.8835
DMF	SBPA	Catalyst_solvent	2,4-dimethyl-2,4-heptadiene	074421-05-9	37.0171	40.8835
DMF	SBPA	Catalyst_solvent	3-methyl-1,2-pentadiene	007417-48-3	38.3295	40.8988
DMF	SBPA	Catalyst_solvent	difluorodiazene-trans	013776-62-0	38.3868	40.8988
DMF	SBPA	Catalyst_solvent	cycloheptene	000628-92-2	36.7735	40.9043
DMF	SBPA	Catalyst_solvent	2-pentyne	000627-21-4	43.4591	40.9043
DMF	SBPA	Catalyst_solvent	hexachloroethane	000067-72-1	38.1289	40.9072
DMF	SBPA	Catalyst_solvent	3-methyl-1,2-butadiene	000598-25-4	39.3674	40.927
DMF	SBPA	Catalyst_solvent	2-methyl-2-hexene	002738-19-4	36.2577	40.927
DMF	SBPA	Catalyst_solvent	2-vinyltoluene	000611-15-4	46.4529	40.9372
DMF	SBPA	Catalyst_solvent	cyclohexene	000110-83-8	36.9715	40.9372
DMF	SBPA	Catalyst_solvent	4-methylstyrene	000622-97-9	46.9714	40.9477
DMF	SBPA	Catalyst_solvent	1,1,1-trichloro-2,2,2-trifluoroethane	000354-58-5	37.0456	40.9477
DMF	SBPA	Catalyst_solvent	1-ethylnaphthalene	001127-76-0	46.3665	40.9528
DMF	SBPA	Catalyst_solvent	4-methylcyclopentene	001759-81-5	36.9047	40.9528
DMF	SBPA	Catalyst_solvent	2-ethylnaphthalene	000939-27-5	46.5738	40.9907
DMF	SBPA	Catalyst_solvent	1-hexene	000592-41-6	36.7417	41.0039
DMF	SBPA	Catalyst_solvent	1,2,3-trimethyl-1h-indene	004773-83-5	42.5578	41.0039
DMF	SBPA	Catalyst_solvent	trimethylborate	000121-43-7	45.7213	41.1215
DMF	SBPA	Catalyst_solvent	vinylcyclohexane	000695-12-5	36.8594	41.1215
DMF	SBPA	Catalyst_solvent	(z)-1,3-pentadiene	001574-41-0	41.9071	41.1473
DMF	SBPA	Catalyst_solvent	4,4-dimethyl-1-pentene	000762-62-9	36.7183	41.1473
DMF	SBPA	Catalyst_solvent	1-trans-3-pentadiene	002004-70-8	41.3641	41.1484
DEF	SBPA	Extraction_solvent	1h-perfluorooctane	000335-65-9	26.2055	41.1555
DEF	SBPA	Extraction_solvent	2-phenyl-1h-pyrrole	003042-22-6	12.2542	41.1979
DMF	SBPA	Catalyst_solvent	6-methyl-1-heptene	005026-76-6	36.5452	41.2666
DMF	SBPA	Catalyst_solvent	isoprene	000078-79-5	41.0143	41.2666
DMF	SBPA	Extraction_solvent	4-(tert-butyl)pyridine	003978-81-2	27.4959	41.2875
DEF	SBPA	Extraction_solvent	2,2'-methylenebisbenzeneamine	006582-52-1	27.5489	41.3479
DMF	SBPA	Extraction_solvent	2-methyl-n-(2-methylpropyl)-1-propanamine	000110-96-3	28.4732	41.3665
DMF	SBPA	Catalyst_solvent	br2	007726-95-6	38.4949	41.4111
DMF	SBPA	Extraction_solvent	1,1-dichloro-2,2,2-trifluoroethane	000306-83-2	12.753	41.4191
DMF	SBPA	Catalyst_solvent	dichloroacetylene	007572-29-4	36.5893	41.442
DMF	SBPA	Catalyst_solvent	1,4-pentadiene	000591-93-5	41.1911	41.442
DMF	SBPA	Catalyst_solvent	3-methylcyclopentene	001120-62-3	36.8534	41.4424
DMF	SBPA	Catalyst_solvent	dicumene	001889-67-4	45.6947	41.4424
DEF	SBPA	Extraction_solvent	hexanenitrile	000628-73-9	29.0031	41.5052
DMF	SBPA	Catalyst_solvent	di(2-ethylhexyl)terephthalate	006422-86-2	46.7176	41.5066
DEF	SBPA	Extraction_solvent	2-propenoicacid-1-methylethylester	000689-12-3	27.8563	41.5485
DMF	SBPA	Catalyst_solvent	3-chlorohexane	002346-81-8	39.8938	41.6001
DMF	SBPA	Extraction_solvent	1-phenylethylamine	000098-84-0	18.74	41.6887
DEF	SBPA	Extraction_solvent	1,1-dibromoethane	000557-91-5	26.829	41.6892
DEF	SBPA	Extraction_solvent	2-pentanolacetate	000626-38-0	30.3561	41.8103
DEF	SBPA	Extraction_solvent	methyltrifluoroacetate	000431-47-0	18.2863	41.975
DMF	SBPA	Extraction_solvent	3,3'-oxybis-propanenitrile	001656-48-0	29.4976	41.9856
DEF	SBPA	Extraction_solvent	3-chloropropene	000107-05-1	13.2205	42.0115
DMF	SBPA	Catalyst_solvent	(e)-1,3-hexadiene	020237-34-7	39.5632	42.0674
DMF	SBPA	Extraction_solvent	3-ethyl-2,4-dimethyl-1h-pyrrole	000517-22-6	11.7838	42.2013
DMF	SBPA	Extraction_solvent	3-hydroxytoluene	000108-39-4	17.471	42.2407
DMF	SBPA	Catalyst_solvent	(e,z)-2,4-hexadiene	005194-50-3	39.7694	42.3573
DMF	SBPA	Catalyst_solvent	2-methyl-1,5-hexadiene	004049-81-4	39.8459	42.4242
DEF	SBPA	Extraction_solvent	2,2-dimethyl-3-pentanone	000564-04-5	28.7875	42.4258
DMF	SBPA	Extraction_solvent	1,1,2,2-tetrachloroethane	000079-34-5	18.9642	42.4685
DMF	SBPA	Extraction_solvent	hexyne	000693-02-7	51.3381	42.6739
DMF	SBPA	Extraction_solvent	4-methyl-1-penten-3-ol	004798-45-2	28.7147	42.7133
DMF	SBPA	Extraction_solvent	b-methylbenzeneethanol	001123-85-9	25.7217	42.7397
DEF	SBPA	Extraction_solvent	formicacidheptylester	000112-23-2	30.4013	42.7477
DEF	SBPA	Extraction_solvent	dimethylsulfide	000075-18-3	18.2518	42.7626
DMF	SBPA	Extraction_solvent	4-methylbenzeneethanol	000699-02-5	27.5136	42.7762
DMF	SBPA	Extraction_solvent	a-methylbenzeneethanol	000698-87-3	27.0764	42.8745
DEF	SBPA	Extraction_solvent	ethoxy-ethene	000109-92-2	23.6815	42.9851
DEF	SBPA	Extraction_solvent	2-pentyne	000627-21-4	28.5788	43.0274
DMF	SBPA	Extraction_solvent	octanedinitrile	000629-40-3	28.9513	43.1067
DEF	SBPA	Extraction_solvent	1,1-dichloroethylene	000075-35-4	12.8212	43.1563
DMF	SBPA	Extraction_solvent	2-hexene-4-ol	004798-58-7	30.2546	43.1776
DMF	SBPA	Catalyst_solvent	1,6-heptadiene	003070-53-9	39.734	43.1809
DMF	SBPA	Catalyst_solvent	hexachlorobenzene	000118-74-1	39.4388	43.6827
DMF	SBPA	Catalyst_solvent	(1,1-dimethylbutyl)benzene	001985-57-5	39.6829	43.7203
DEF	SBPA	Extraction_solvent	2-phenylpropionaldehyde	000093-53-8	31.0171	43.7594
DEF	SBPA	Extraction_solvent	p-isopropylcumenehydroperoxide	000098-49-7	26.8041	43.799
DMF	SBPA	Extraction_solvent	4-methylpiperidine	000626-58-4	29.1524	44.0617
DMF	SBPA	Extraction_solvent	1,1,2,2-tetrabromoethane	000079-27-6	17.5171	44.1209
DMF	SBPA	Extraction_solvent	2,4,5-trimethylpyridine	001122-39-0	26.5443	44.3781
DMF	SBPA	Extraction_solvent	2-ethoxyaniline	000094-70-2	15.746	44.579
DMF	SBPA	Extraction_solvent	4-propylbenzenamine	002696-84-6	9.1058	44.6926
DEF	SBPA	Extraction_solvent	bromoethane	000074-96-4	17.1496	45.048
DMF	SBPA	Extraction_solvent	1,1,1-triethoxyethane	000078-39-7	29.1744	45.2279
DEF	SBPA	Extraction_solvent	1-nitroheptane	000693-39-0	28.6205	45.4387
DMF	SBPA	Extraction_solvent	2,2-dimethyl-oxirane	000558-30-5	28.5144	45.5163
DEF	SBPA	Extraction_solvent	1,1,1-triethoxyethane	000078-39-7	32.0366	45.814
DEF	SBPA	Extraction_solvent	2,2,2-trinitro-1-phenylethane	038677-56-4	30.6624	45.9648
DEF	SBPA	Extraction_solvent	chlorotrimethylsilane	000075-77-4	29.329	45.9689
DEF	SBPA	Extraction_solvent	2-hydroxy-benzoicacidmethylester	000119-36-8	30.5763	45.9918
DMF	SBPA	Extraction_solvent	2-ethylbenzeneamine	000578-54-1	9.32585	46.1331
DMF	SBPA	Extraction_solvent	t-butylmalononitrile	004210-60-0	25.8053	46.1331
DEF	SBPA	Extraction_solvent	3-methyl-1-butyne	000598-23-2	12.1028	46.1373
DMF	SBPA	Extraction_solvent	1-methyl-1-phenylhydrazine	000618-40-6	17.931	46.1904
DMF	SBPA	Extraction_solvent	2,5-xylidine	000095-78-3	10.3002	46.5123
DMF	SBPB	Catalyst_solvent	1,3-dimethylbenzene	000108-38-3	50.7065	46.5324
DMF	SBPB	Catalyst_solvent	1,2-dimethylbenzene	000095-47-6	52.3283	46.5377
DMF	SBPA	Catalyst_solvent	diisopropylether	000108-20-3	55.1043	46.5407
DMF	SBPB	Catalyst_solvent	1,4-dimethylbenzene	000106-42-3	50.6288	46.5427
DMF	SBPA	Extraction_solvent	5-methylisoxazole	005765-44-6	28.7033	46.5734
DMF	SBPB	Catalyst_solvent	1-decene	000872-05-9	43.8234	46.6597
DMF	SBPB	Catalyst_solvent	2-methyl-1-nonene	002980-71-4	43.8719	46.6637
DMF	SBPB	Catalyst_solvent	2-methyl-1-octene	004588-18-5	43.9503	46.6757
DMF	SBPB	Catalyst_solvent	4-methyl-1-heptene	013151-05-8	43.8459	46.6773
DMF	SBPB	Catalyst_solvent	3-ethyl-1-hexene	003404-58-8	43.8775	46.6796
DMF	SBPB	Catalyst_solvent	2,3-dimethyl-1-hexene	016746-86-4	43.9665	46.6832
DMF	SBPB	Catalyst_solvent	2-methyl-1-heptene	015870-10-7	44.0578	46.6873
DMF	SBPB	Catalyst_solvent	1-heptene	000592-76-7	44.16	46.692
DMF	SBPB	Catalyst_solvent	trans-2-hexene	004050-45-7	43.8562	46.6935
DMF	SBPB	Catalyst_solvent	3-methyl-1-hexene	003404-61-3	44.0421	46.6949
DMF	SBPB	Catalyst_solvent	4-methyl-1-hexene	003769-23-1	43.984	46.6952
DMF	SBPB	Catalyst_solvent	3-methyl-cis-2-pentene	000922-62-3	43.9048	46.6969
DMF	SBPB	Catalyst_solvent	2-ethyl-1-pentene	003404-71-5	44.0892	46.7012
DMF	SBPB	Catalyst_solvent	2-methyl-2-pentene	000625-27-4	43.9438	46.7021
DMF	SBPB	Catalyst_solvent	2,3-dimethyl-2-butene	000563-79-1	44.1017	46.7089
DMF	SBPB	Catalyst_solvent	2-ethyl-1-butene	000760-21-4	44.1671	46.7101
DMF	SBPB	Catalyst_solvent	1-methylcyclopentene	000693-89-0	44.1996	46.7164
DMF	SBPB	Catalyst_solvent	cyclooctene	000931-88-4	44.3604	46.7212
DMF	SBPB	Catalyst_solvent	1-undecene	000821-95-4	43.7819	46.7702
DMF	SBPA	Extraction_solvent	indoline	000496-15-1	21.9673	46.8217
DEF	SBPA	Extraction_solvent	eugenol	000097-53-0	23.8433	46.8984
DMF	SBPA	Extraction_solvent	1,4-oxathiane	015980-15-1	28.6282	46.9933
DEF	SBPA	Extraction_solvent	7h-dibenzo(c,g)carbazole	000194-59-2	12.1501	47.1209
DMF	SBPA	Extraction_solvent	4-fluoroacetophenone	000403-42-9	22.6585	47.1963
DMF	SBPA	Extraction_solvent	2-chloropyridine	000109-09-1	28.4302	47.2319
DMF	SBPA	Extraction_solvent	1,1-dichloro-1,2,2-trifluoroethane	000812-04-4	22.8935	47.2798
DEF	SBPA	Extraction_solvent	dichloromethylsilane	000075-54-7	24.8703	47.484
DMF	SBPA	Extraction_solvent	2-thiophenecarboxaldehyde	000098-03-3	29.1475	47.4878
DMF	SBPA	Extraction_solvent	ethylenetricarbonitrile	000997-76-2	25.3797	47.6651
DEF	SBPA	Extraction_solvent	1-fluorobutane	002366-52-1	28.9652	47.7624
DMF	SBPA	Extraction_solvent	4-chloro-2-butanone	006322-49-2	27.8724	47.9228
DMF	SBPA	Extraction_solvent	6-oxabicyclo[3,1,0]hexane	000285-67-6	30.5928	47.9397
DEF	SBPA	Extraction_solvent	2-chloropropane	000075-29-6	22.969	47.9701
DMF	SBPA	Extraction_solvent	benzaldehyde	000100-52-7	27.3629	48.2327
DMF	SBPA	Extraction_solvent	3-phenyl-2-propenal	000104-55-2	29.9869	48.2664
DMF	SBPA	Extraction_solvent	2,5-dimethylpyrrole	000625-84-3	9.1058	48.5552
DEF	SBPA	Extraction_solvent	1,2-methylenedioxy-4-propenylbenzene	000120-58-1	31.1095	48.6247
DMF	SBPB	Catalyst_solvent	n-decane	000124-18-5	42.4881	48.825
DMF	SBPB	Catalyst_solvent	2-methyl-nonane	000871-83-0	42.5163	48.8412
DEF	SBPA	Extraction_solvent	1,2-dimethyl-3-nitrobenzene	000083-41-0	32.0039	48.8415
DMF	SBPA	Extraction_solvent	5-methyl-2-thiophenecarboxaldehyde	013679-70-4	22.0398	48.8808
DMF	SBPB	Catalyst_solvent	5-methyl-nonane	015869-85-9	42.5103	48.9213
DMF	SBPB	Catalyst_solvent	n-nonane	000111-84-2	42.4281	48.9256
DMF	SBPB	Catalyst_solvent	2,3-dimethyloctane	007146-60-3	42.529	48.9619
DMF	SBPB	Catalyst_solvent	4-methyl-nonane	017301-94-9	42.5036	48.9812
DMF	SBPB	Catalyst_solvent	2,5-dimethyloctane	015869-89-3	42.5646	48.9864
DMF	SBPB	Catalyst_solvent	2,7-dimethyloctane	001072-16-8	42.5697	48.9874
DMF	SBPB	Extraction_solvent	2-(1,1-dimethylethyl)-4-methylphenol	002409-55-4	29.558	49.0132
DMF	SBPB	Catalyst_solvent	2,6-dimethyloctane	002051-30-1	42.5729	49.0173
DMF	SBPB	Catalyst_solvent	3-ethylheptane	015869-80-4	42.4031	49.0288
DMF	SBPB	Catalyst_solvent	2-methyloctane	003221-61-2	42.4698	49.0317
DMF	SBPB	Catalyst_solvent	3-methyloctane	002216-33-3	42.4524	49.0405
DMF	SBPB	Catalyst_solvent	2,2-dimethyloctane	015869-87-1	42.629	49.043
DMF	SBPB	Catalyst_solvent	2,4-dimethyloctane	004032-94-4	42.6199	49.0508
DMF	SBPB	Catalyst_solvent	4-methyloctane	002216-34-4	42.4663	49.0645
DMF	SBPB	Catalyst_solvent	octane	000111-65-9	42.3799	49.0883
DMF	SBPB	Catalyst_solvent	n-hexylcyclopentane	004457-00-5	42.673	49.1357
DEF	SAPA	Extraction_solvent	ethynylbenzene	000536-74-3	50.3631	49.1388
DMF	SBPB	Catalyst_solvent	2,6-dimethyl-heptane	001072-05-5	42.5334	49.1531
DMF	SBPB	Catalyst_solvent	tetraethylsilane	000631-36-7	42.5335	49.178
DMF	SBPB	Catalyst_solvent	2-methylheptane	000592-27-8	42.4079	49.1906
DMF	SBPB	Catalyst_solvent	3-ethylhexane	000619-99-8	42.3551	49.2206
DMF	SBPB	Catalyst_solvent	2,2-dimethylheptane	001071-26-7	42.5775	49.2335
DMF	SBPB	Catalyst_solvent	3-methylheptane	000589-81-1	42.4108	49.2379
DMF	SBPB	Catalyst_solvent	4-methylheptane	000589-53-7	42.4047	49.2384
DMF	SBPB	Catalyst_solvent	butylcyclohexane	001678-93-9	42.6197	49.2398
DMF	SBPB	Catalyst_solvent	trans-1,4-diethylcyclohexane	013990-93-7	42.6527	49.3055
DMF	SBPB	Catalyst_solvent	bicyclohexyl	000092-51-3	42.8815	49.3081
DMF	SBPB	Catalyst_solvent	n-heptane	000142-82-5	42.3187	49.3103
DMF	SBPB	Catalyst_solvent	2,3-dimethylhexane	000584-94-1	42.4325	49.3359
DMF	SBPB	Catalyst_solvent	2,2,5-trimethylhexane	003522-94-9	42.6325	49.3398
DMF	SBPB	Catalyst_solvent	2,2,5,5-tetramethylhexane	001071-81-4	42.8004	49.3422
DMF	SBPB	Catalyst_solvent	3,4-dimethylhexane	000583-48-2	42.434	49.379
DMF	SBPB	Catalyst_solvent	2,2,4-trimethylhexane	016747-26-5	42.6291	49.4008
DMF	SBPB	Catalyst_solvent	isobutylcyclohexane	001678-98-4	42.7019	49.4182
DMF	SBPB	Catalyst_solvent	2-methylhexane	000591-76-4	42.369	49.4541
DMF	SBPB	Catalyst_solvent	3-methyl-hexane	000589-34-4	42.351	49.4693
DMF	SBPA	Extraction_solvent	2,4-dimethylthiazole	000541-58-2	22.8695	49.4787
DMF	SBPB	Catalyst_solvent	n-propylcyclohexane	001678-92-8	42.5881	49.5137
DMF	SBPB	Catalyst_solvent	2,4,4-trimethylhexane	016747-30-1	42.6025	49.533
DMF	SBPB	Catalyst_solvent	3-ethyl-3-methylpentane	001067-08-9	42.4778	49.538
DMF	SBPB	Catalyst_solvent	2-methyl-3-ethylpentane	000609-26-7	42.4311	49.5395
DMF	SBPB	Catalyst_solvent	isopropylcyclohexane	000696-29-7	42.6118	49.574
DMF	SBPB	Catalyst_solvent	2,3,4-trimethylpentane	000565-75-3	42.5334	49.5847
DMF	SBPB	Catalyst_solvent	hexane	000110-54-3	42.2636	49.618
DMF	SBPB	Catalyst_solvent	propylcyclopentane	002040-96-2	42.5538	49.6244
DMF	SBPA	Extraction_solvent	methyl-maleic-anhydride	000616-02-4	30.2535	49.6331
DMF	SBPA	Extraction_solvent	3-oxobutanoicacidbutylester	000591-60-6	27.1262	49.6498
DMF	SBPB	Catalyst_solvent	ethylcyclohexane	001678-91-7	42.538	49.6702
DMF	SBPA	Extraction_solvent	dilactide(dl)	000095-96-5	26.7419	49.6816
DMF	SBPB	Catalyst_solvent	cis-2-dodecene	007206-26-0	43.6416	49.6826
DMF	SBPA	Extraction_solvent	methylthiocyanate	000556-64-9	27.8297	49.6883
DMF	SBPB	Catalyst_solvent	2,2,3-trimethylpentane	000564-02-3	42.6337	49.6962
DMF	SBPB	Catalyst_solvent	trans-decalin	000493-02-7	42.7493	49.7026
DMF	SBPA	Extraction_solvent	1-octanol	000111-87-5	37.0922	49.7067
DMF	SBPB	Catalyst_solvent	cis-decalin	000493-01-6	42.7906	49.7146
DMF	SBPB	Catalyst_solvent	1,3-dimethyladamantane	000702-79-4	43.0143	49.7375
DMF	SBPB	Catalyst_solvent	2,3-dimethylpentane	000565-59-3	42.4653	49.7791
DMF	SBPB	Catalyst_solvent	1-dodecene	000112-41-4	43.7423	49.7988
DMF	SBPB	Catalyst_solvent	2,2-dimethylpentane	000590-35-2	42.5021	49.806
DMF	SBPB	Catalyst_solvent	3-methylpentane	000096-14-0	42.3108	49.8342
DMF	SBPB	Catalyst_solvent	trans-1,2-dimethylcyclohexane	006876-23-9	42.6011	49.8784
DMF	SBPB	Catalyst_solvent	ethylcyclopentane	001640-89-7	42.5116	49.882
DMF	SBPB	Catalyst_solvent	ethylbenzene	000100-41-4	51.3972	49.8964
DMF	SBPB	Catalyst_solvent	octene	000111-66-0	44.0122	49.9034
DMF	SBPB	Catalyst_solvent	1a,3a,5b-trimethylcyclohexane	001795-26-2	42.775	49.9041
DMF	SBPB	Catalyst_solvent	cycloheptane	000291-64-5	42.5365	49.9677
DMF	SBPB	Catalyst_solvent	cyclooctane	000292-64-8	42.6796	49.9945
DMF	SBPB	Catalyst_solvent	trans-1,3-dimethylcyclopentane	001759-58-6	42.5244	49.9969
DMF	SBPB	Catalyst_solvent	(e)-4-octene	014850-23-8	43.5157	50.0278
DMF	SBPB	Catalyst_solvent	1,1-dimethylcyclohexane	000590-66-9	42.7412	50.0386
DMF	SBPB	Catalyst_solvent	cyclohexane	000110-82-7	42.397	50.0964
DMF	SBPB	Catalyst_solvent	trans-1,2-dimethylcyclopentane	000822-50-4	42.5727	50.1025
DMF	SBPB	Catalyst_solvent	pentaethylbenzene	000605-01-6	45.4421	50.1541
DMF	SBPB	Catalyst_solvent	1-nonene	000124-11-8	43.7376	50.2784
DMF	SBPB	Catalyst_solvent	2,2-dimethylbutane	000075-83-2	42.4744	50.2801
DMF	SBPB	Catalyst_solvent	methylcyclopentane	000096-37-7	42.5129	50.2978
DMF	SBPB	Catalyst_solvent	di-n-hexylether	000112-58-3	47.9236	50.3037
DMF	SBPB	Catalyst_solvent	trans-3-octene	014919-01-8	43.5075	50.3094
DEF	SBPA	Extraction_solvent	1,2,4,5-benzenetetracarboxylicanhydride	000089-32-7	24.7421	50.3242
DMF	SBPB	Catalyst_solvent	dinonylether	002456-27-1	46.4648	50.3279
DMF	SBPB	Catalyst_solvent	pentane	000109-66-0	42.2039	50.3844
DMF	SBPB	Catalyst_solvent	trans-2-octene	013389-42-9	43.6258	50.408
DMF	SBPB	Catalyst_solvent	6-methyl-1-heptene	005026-76-6	44.1724	50.4337
DMF	SBPB	Catalyst_solvent	cis-4-octene	007642-15-1	43.7114	50.5114
DMF	SBPA	Extraction_solvent	pyrotataricanhydride	004100-80-5	25.9745	50.5173
DMF	SBPB	Catalyst_solvent	cyclopentane	000287-92-3	42.4605	50.557
DMF	SBPB	Catalyst_solvent	1,3,5-triisopropylbenzene	000717-74-8	46.2206	50.6042
DMF	SBPB	Catalyst_solvent	trans-3-heptene	014686-14-7	43.567	50.6097
DMF	SBPB	Catalyst_solvent	terpinolene	000586-62-9	45.6734	50.7194
DMF	SBPB	Catalyst_solvent	cis-2-heptene	006443-92-1	43.7341	50.7229
DMF	SBPB	Catalyst_solvent	trans-2-heptene	014686-13-6	43.7132	50.7249
DMF	SBPB	Catalyst_solvent	n-octylbenzene	002189-60-8	46.6409	50.736
DMF	SBPB	Catalyst_solvent	5-ethylidene-2-norbornene	016219-75-3	46.9312	50.736
DMF	SBPB	Catalyst_solvent	1-methyl-4-(1-methylethyl)-1,4-cyclohexadiene	000099-85-4	45.6353	50.7466
DMF	SBPB	Catalyst_solvent	2,2,4-trimethyl-2-pentene	000107-40-4	43.7649	50.7577
DMF	SBPB	Catalyst_solvent	1,3,5-triethylbenzene	000102-25-0	46.3707	50.8046
DMF	SBPB	Catalyst_solvent	methylbutane	000078-78-4	42.2753	50.8595
DEF	SBPA	Extraction_solvent	divinylether	000109-93-3	12.1028	50.9504
DMF	SBPB	Catalyst_solvent	2-methyl-5-(1-methylethyl)-1,3-cyclohexadiene	000099-83-2	46.2461	51.0079
DMF	SBPA	Extraction_solvent	2-furancarbonitrile	000617-90-3	29.0647	51.0105
DMF	SBPB	Catalyst_solvent	1,2,3-triethylbenzene	042205-08-3	47.0122	51.0249
DMF	SBPB	Catalyst_solvent	trans-3-hexene	013269-52-8	43.684	51.0665
DMF	SAPA	Extraction_solvent	ethynylbenzene	000536-74-3	48.313	51.1457
DMF	SBPA	Extraction_solvent	n-methylaniline	000100-61-8	22.6966	51.189
DMF	SBPB	Catalyst_solvent	1,4-bis(1-methylethyl)-benzene	000100-18-5	47.4381	51.1892
DMF	SBPB	Catalyst_solvent	hexylbenzene	001077-16-3	47.445	51.1906
DMF	SBPB	Catalyst_solvent	1,3-bis(1-methylethyl)-benzene	000099-62-7	47.5497	51.2506
DMF	SBPB	Catalyst_solvent	vinylnorbornene	003048-64-4	47.6106	51.2506
DMF	SBPB	Catalyst_solvent	dicyclopentadiene	000077-73-6	46.0627	51.3099
DEF	SBPA	Extraction_solvent	2,6-diethylbenzeneamine	000579-66-8	28.0689	51.3673
DMF	SBPA	Extraction_solvent	2-thiopheneacetonitrile	020893-30-5	23.2461	51.3841
DEF	SBPA	Extraction_solvent	4,5,6-trichloroguaiacol	002668-24-8	12.558	51.4056
DMF	SBPA	Extraction_solvent	3-thienylacetonitrile	013781-53-8	22.4734	51.42
DMF	SBPB	Catalyst_solvent	pentylbenzene	000538-68-1	48.0153	51.4232
DMF	SBPB	Catalyst_solvent	tetramethylsilane	000075-76-3	42.9268	51.4628
DMF	SBPA	Extraction_solvent	diisopropylcyanamide	003085-76-5	28.0076	51.5699
DMF	SBPB	Catalyst_solvent	1,4-diethylbenzene	000105-05-5	47.9612	51.607
DMF	SBPA	Extraction_solvent	phenylacetonitrile	000140-29-4	27.9541	51.7974
DMF	SBPB	Catalyst_solvent	2,5-dimethyl-2,4-hexadiene	000764-13-6	46.0281	51.8069
DMF	SBPB	Catalyst_solvent	1,3-diethylbenzene	000141-93-5	48.0248	51.9793
DMF	SBPA	Extraction_solvent	nicotinicacidethylester	000614-18-6	28.3741	52.0319
DEF	SAPA	Extraction_solvent	isocyanatobenzene	000103-71-9	49.1558	52.1316
DMF	SBPB	Catalyst_solvent	cycloheptene	000628-92-2	44.4547	52.3032
DEF	SAPA	Extraction_solvent	butylformate	000592-84-7	48.5406	52.3234
DMF	SBPA	Extraction_solvent	4-methyl-3-penten-2-one	000141-79-7	29.9489	52.5433
DEF	SBPA	Extraction_solvent	isoprene	000078-79-5	31.3058	52.5767
DMF	SBPA	Extraction_solvent	benzaldehyde	000100-52-7	27.3629	52.6888
DMF	SBPA	Extraction_solvent	2-ethyl-1-hexanol	000104-76-7	36.4746	52.7266
DMF	SAPB	Extraction_solvent	2-methoxyphenol	000090-05-1	49.1804	52.7801
DMF	SBPB	Catalyst_solvent	4-methyl-trans-2-pentene	000674-76-0	43.8031	52.885
DMF	SBPB	Catalyst_solvent	hexamethyldisiloxane	000107-46-0	44.7079	52.9651
DEF	SBPA	Extraction_solvent	2-methoxy-4-propylphenol	002785-87-7	25.6203	52.9808
DEF	SBPA	Extraction_solvent	alpha,alpha-diphenylbenzenemethanol	000076-84-6	12.9523	53.2034
DMF	SBPB	Catalyst_solvent	1,1-dimethylcyclopentane	001638-26-2	42.7144	53.3125
DMF	SBPB	Catalyst_solvent	2,5-dimethyl-1,5-hexadiene	000627-58-7	47.4742	53.373
DEF	SBPA	Extraction_solvent	n-ethyl-2-methylbenzenamine	000094-68-8	28.5699	53.6098
DMF	SBPA	Extraction_solvent	n-tert-butyl-alpha-(4-nitrophenyl)nitrone	003585-88-4	25.9886	54.0024
DMF	SBPA	Extraction_solvent	dimethylcarbonate	000616-38-6	28.4243	54.0024
DMF	SBPB	Catalyst_solvent	(z)-2-hexene	007688-21-3	44.1617	54.3563
DEF	SAPA	Extraction_solvent	heptanal	000111-71-7	48.8925	54.4
DEF	SBPA	Extraction_solvent	1,1,2,2-tetrabromoethane	000079-27-6	25.9836	54.4462
DMF	SBPB	Catalyst_solvent	5-methyl-1-hexene	003524-73-0	44.4188	54.534
DMF	SBPB	Catalyst_solvent	(e)-3-methyl-2-pentene	000616-12-6	43.9364	54.5387
DEF	SAPA	Extraction_solvent	2-heptanone	000110-43-0	50.1837	54.9603
DMF	SBPA	Extraction_solvent	aniline	000062-53-3	17.6973	55.1254
DMF	SBPB	Catalyst_solvent	toluene	000108-88-3	54.0266	55.2966
DMF	SBPB	Catalyst_solvent	cyclohexene	000110-83-8	44.7003	55.3704
DMF	SBPB	Catalyst_solvent	2,3,3-trimethyl-1-butene	000594-56-9	44.3845	55.56
DMF	SAPB	Extraction_solvent	ch2cl2	000075-09-2	50.0114	55.7358
DMF	SBPB	Catalyst_solvent	ccl4	000056-23-5	44.5002	56.0173
DMF	SBPA	Extraction_solvent	1-hexanol	000111-27-3	36.5354	56.4589
DMF	SBPB	Catalyst_solvent	trans,trans-2,4-hexadiene	005194-51-4	47.6286	56.514
DMF	SBPB	Catalyst_solvent	3-methyl-1-pentene	000760-20-3	44.2514	56.6173
DMF	SBPB	Catalyst_solvent	2-methylpentane	000107-83-5	42.3213	56.6254
DMF	SBPB	Catalyst_solvent	4-methyl-1-pentene	000691-37-2	44.2941	56.708
DMF	SAPA	Extraction_solvent	hexyne	000693-02-7	61.7495	56.7714
DMF	SBPB	Catalyst_solvent	4-methylcyclopentene	001759-81-5	44.6171	57.6341
DMF	SBPB	Catalyst_solvent	1-hexene	000592-41-6	44.4151	57.6452
DMF	SBPA	Extraction_solvent	4-ethenyl-1,3-dioxolan-2-one	004427-96-7	25.3412	57.6931
DMF	SBPB	Catalyst_solvent	3-methylcyclopentene	001120-62-3	44.5533	57.7893
DMF	SBPB	Catalyst_solvent	2-methyl-1-pentene	000763-29-1	44.5352	58.0102
DMF	SBPB	Catalyst_solvent	diisopropylether	000108-20-3	67.0871	58.3055
DMF	SBPB	Catalyst_solvent	2,3-dimethyl-1,3-butadiene	000513-81-5	47.1573	58.4198
DMF	SBPB	Catalyst_solvent	benzene	000071-43-2	60.1874	58.7653
DMF	SBPB	Catalyst_solvent	2,3-dimethyl-1-butene	000563-78-0	44.462	59.1999
DMF	SBPB	Catalyst_solvent	1,4-hexadiene	000592-45-0	47.8615	59.2011
MeF	SAPB	Extraction_solvent	2-vinylfuran	001487-18-9	54.3601	59.4301
MeF	SAPB	Extraction_solvent	styrene	000100-42-5	55.3047	59.9007
DMF	SBPB	Catalyst_solvent	n-methylaniline	000100-61-8	47.5163	60.7936
DEF	SAPA	Extraction_solvent	styrene	000100-42-5	50.1996	61.018
DMF	SBPA	Extraction_solvent	isobutanal	000078-84-2	27.1414	61.2735
DEF	SAPA	Extraction_solvent	ethylbenzene	000100-41-4	50.4967	61.299
DEF	SBPA	Extraction_solvent	2-butyne	000503-17-3	22.6661	61.5349
DMF	SBPB	Extraction_solvent	2,4,5-trimethylphenol	000496-78-6	29.8037	61.921
DMF	SBPB	Extraction_solvent	thymol	000089-83-8	29.5591	62.2287
DMF	SBPB	Catalyst_solvent	3,3-dimethyl-1-butene	000558-37-2	44.5956	62.3889
DMF	SBPB	Catalyst_solvent	cyclopentene	000142-29-0	45.055	62.4287
DMF	SBPB	Extraction_solvent	2,3,6-trimethylphenol	002416-94-6	27.7448	62.457
DMF	SBPB	Extraction_solvent	2,3,6-trimethylphenol	002416-94-6	27.7448	62.457
DMF	SBPB	Extraction_solvent	2,4,6-trichlorophenol	000088-06-2	24.1922	62.8768
DMF	SBPB	Extraction_solvent	2,4,6-trichlorophenol	000088-06-2	24.1922	62.8768
DMF	SAPA	Extraction_solvent	2-ethyl-1-hexanol	000104-76-7	63.2687	62.8901
DMF	SBPB	Catalyst_solvent	2-methyl-2-butene	000513-35-9	44.4061	63.0701
DMF	SAPB	Extraction_solvent	hexyne	000693-02-7	58.3568	63.2847
DMF	SBPB	Catalyst_solvent	trans-2-pentene	000646-04-8	44.0438	63.2931
DMF	SBPB	Catalyst_solvent	(z)-2-pentene	000627-20-3	44.4404	63.4318
DMF	SBPB	Extraction_solvent	2-benzylphenol	028994-41-4	28.3275	63.5821
DMF	SBPB	Extraction_solvent	2-benzylphenol	028994-41-4	28.3275	63.5821
DMF	SBPB	Catalyst_solvent	3-methyl-1,2-butadiene	000598-25-4	47.6651	64.3537
DMF	SAPB	Extraction_solvent	2-nonylphenol	000136-83-4	59.5476	64.5813
DMF	SBPA	Extraction_solvent	3-bromopropyne	000106-96-7	9.1058	64.9281
DMF	SAPA	Extraction_solvent	1-octanol	000111-87-5	71.8114	65.1658
DMF	SBPB	Catalyst_solvent	2-methyl-1-butene	000563-46-2	44.9434	65.3271
DMF	SBPA	Extraction_solvent	tetramethylorthocarbonate	001850-14-2	24.4961	65.4667
DMF	SBPB	Catalyst_solvent	pentene	000109-67-1	44.8142	65.5168
DEF	SBPA	Extraction_solvent	1,4-pentadiene	000591-93-5	30.8906	66.6477
DMF	SAPA	Extraction_solvent	1,1,2,2-tetrachloroethane	000079-34-5	44.2887	66.8461
DMF	SBPB	Catalyst_solvent	isoprene	000078-79-5	49.7007	66.8787
DMF	SBPA	Extraction_solvent	1-heptyne	000628-71-7	55.7342	67.2345
DMF	SBPA	Extraction_solvent	4-methyl-3-heptanol	014979-39-6	28.4253	67.6239
DMF	SAPB	Extraction_solvent	eugenol	000097-53-0	52.8748	68.0743
DMF	SAPA	Extraction_solvent	n-methylaniline	000100-61-8	49.6735	68.4707
DMF	SBPA	Extraction_solvent	octyne	000629-05-0	60.0337	69.4383
DMF	SAPB	Extraction_solvent	Phenylformate	001864-94-4	53.3986	69.7991
DEF	SBPA	Extraction_solvent	2,2-dimethylbutane	000075-83-2	18.3351	70.2598
DEF	SBPA	Extraction_solvent	2,3-dimethylbutane	000079-29-8	27.4262	70.8169
DMF	SBPB	Extraction_solvent	2,3,4,5-tetramethylphenol	000488-70-0	29.1584	70.8264
DMF	SAPB	Extraction_solvent	1,3-hexadien-5-yne	010420-90-3	47.825	70.8524
DMF	SAPA	Extraction_solvent	ch2cl2	000075-09-2	75.7573	71.1363
DMF	SAPB	Extraction_solvent	1-penten-4-yne	000871-28-3	49.3144	71.6476
DMF	SBPA	Extraction_solvent	aceticacid-2-methylpropylester	000110-19-0	35.4015	71.7194
DMF	SAPA	Extraction_solvent	1,6-heptadiyne	002396-63-6	44.5619	71.8298
DMF	SAPA	Extraction_solvent	1,3-hexadien-5-yne	010420-90-3	44.6294	71.871
DMF	SBPB	Extraction_solvent	3-isopropyl-2-methylphenol	004371-48-6	29.7108	72.3794
DMF	SBPB	Extraction_solvent	2,3,5-trimethylphenol	000697-82-5	30.0253	72.7873
DMF	SBPA	Extraction_solvent	n-butylacetate	000123-86-4	35.6326	73.0925
DEF	SBPA	Extraction_solvent	methylcyclobutane	000598-61-8	27.6754	74.437
DMF	SAPB	Extraction_solvent	4-methyl-2-methoxyphenol	000093-51-6	50.5599	74.9875
DMF	SAPA	Extraction_solvent	1-heptyne	000628-71-7	77.0734	75.1303
DMF	SBPB	Extraction_solvent	ch2cl2	000075-09-2	104.068	75.4741
DMF	SBPA	Extraction_solvent	hexahydro-1h-azepine	000111-49-9	24.3167	75.939
DMF	SAPB	Extraction_solvent	2,3-dihydrofuran	001191-99-7	76.8065	76.2563
DMF	SBPB	Extraction_solvent	4-(1-methyl-1-phenylethyl)-phenol	000599-64-4	29.1432	76.5759
DMF	SBPB	Extraction_solvent	n-methylaniline	000100-61-8	52.4736	76.5961
DMF	SAPB	Extraction_solvent	aceticacid-2-methylpropylester	000110-19-0	73.1709	76.7013
DMF	SAPB	Extraction_solvent	2-vinylfuran	001487-18-9	55.8459	76.964
DMF	SAPB	Extraction_solvent	2-ethylfuran	003208-16-0	89.1963	81.8745
DMF	SBPB	Extraction_solvent	2-naphthol	000135-19-3	32.0948	82.23
DEF	SAPA	Extraction_solvent	octanal	000124-13-0	50.0368	82.3178
DMF	SBPB	Extraction_solvent	2-(1,1-dimethylethyl)-5-methylphenol	000088-60-8	29.6664	83.191
DMF	SAPA	Extraction_solvent	benzaldehyde	000100-52-7	89.8013	83.5647
MeF	SAPA	Extraction_solvent	styrene	000100-42-5	68.7792	84.4223
DMF	SAPA	Extraction_solvent	1-hexanol	000111-27-3	79.7526	84.9418
DMF	SBPA	Extraction_solvent	n,n-dimethylcyclohexylamine	000098-94-2	20.6421	85.4943
DMF	SAPB	Extraction_solvent	2-methylfuran	000534-22-5	81.0598	86.4768
DMF	SAPA	Extraction_solvent	octyne	000629-05-0	90.4039	87.1041
DEF	SBPA	Extraction_solvent	p-isopropylaniline	000099-88-7	13.231	87.2275
DEF	SBPA	Extraction_solvent	2,4,6-trichlorophenol	000088-06-2	12.2995	87.8934
DMF	SAPB	Extraction_solvent	2-ethyl-1-hexanol	000104-76-7	54.4711	88.4436
DMF	SBPA	Extraction_solvent	3-azabicyclo[3,2,2]nonane	000283-24-9	24.8328	89.1904
DMF	SAPB	Extraction_solvent	1-octanol	000111-87-5	58.1789	90.3716
DMF	SBPB	Extraction_solvent	benzaldehyde	000100-52-7	94.1015	91.0812
DMF	SAPB	Extraction_solvent	benzaldehyde	000100-52-7	64.9223	91.5018
MeF	SBPB	Catalyst_solvent	cycloheptane	000291-64-5	96.0124	91.7629
DMF	SAPB	Extraction_solvent	Dimethylcarbonate	000616-38-6	68.2614	91.8192
DMF	SAPB	Extraction_solvent	furane	000110-00-9	61.5484	92.9809
MeF	SBPB	Catalyst_solvent	octane	000111-65-9	96.0754	93.6702
MeF	SAPB	Extraction_solvent	1,3-dimethylbenzene	000108-38-3	55.4324	94.0192
DMF	SBPB	Extraction_solvent	3-chloropropyne	000624-65-7	26.2406	94.3691
DMF	SBPB	Extraction_solvent	1-octanol	000111-87-5	84.3151	95.3192
DMF	SAPB	Extraction_solvent	n-butylacetate	000123-86-4	72.5657	95.5529
MeF	SBPB	Catalyst_solvent	(e)-4-octene	014850-23-8	101.09	95.9042
MeF	SBPB	Catalyst_solvent	trans-2-octene	013389-42-9	101.545	96.0381
DEF	SBPA	Extraction_solvent	octanenitrile	000124-12-9	31.3838	100.502
DMF	SAPB	Extraction_solvent	2-butylphenol	003180-09-4	57.8568	102.018
MeF	SBPA	Catalyst_solvent	octane	000111-65-9	99.682	103.635
DMF	SBPB	Extraction_solvent	triethylamine	000121-44-8	95.2393	104.55
MeF	SBPB	Extraction_solvent	thymol	000089-83-8	27.86	107.471
MeF	SBPB	Catalyst_solvent	octane	000111-65-9	96.0754	108.048
MeF	SBPB	Catalyst_solvent	2,3,4-trimethylpentane	000565-75-3	96.5025	108.556
DMF	SAPA	Extraction_solvent	3-hydroxytoluene	000108-39-4	47.1241	109.126
DMF	SBPB	Extraction_solvent	aceticacid-2-methylpropylester	000110-19-0	101.629	109.144
DEF	SBPA	Extraction_solvent	2,4,6-trimethylbenzenamine	000088-05-1	26.6024	109.832
MeF	SBPB	Catalyst_solvent	n-nonane	000111-84-2	96.6661	110.152
MeF	SBPB	Catalyst_solvent	cyclohexane	000110-82-7	94.9473	110.56
MeF	SBPB	Extraction_solvent	2-ethyl-1h-pyrrole	001551-06-0	25.1389	110.975
DMF	SAPA	Extraction_solvent	n-butylacetate	000123-86-4	116.906	111.442
DMF	SBPB	Extraction_solvent	2-ethyl-1-hexanol	000104-76-7	80.9903	112.183
MeF	SBPB	Catalyst_solvent	2,2,4-trimethylhexane	016747-26-5	97.4588	114.26
DMF	SAPB	Extraction_solvent	styreneoxide	000096-09-3	58.1896	116.239
DMF	SAPB	Extraction_solvent	n,4-dimethylaniline	000623-08-5	49.6788	117.501
MeF	SAPB	Extraction_solvent	1,4-dimethylbenzene	000106-42-3	55.4268	119.49
DMF	SBPB	Extraction_solvent	n-butylacetate	000123-86-4	101.694	119.577
DMF	SAPA	Extraction_solvent	aceticacid-2-methylpropylester	000110-19-0	116.388	122.068
DMF	SAPB	Extraction_solvent	3-methyl-2-butanone	000563-80-4	96.2946	126.629
DMF	SBPB	Extraction_solvent	3-methyl-2-butanone	000563-80-4	118.96	127.238
MeF	SBPB	Extraction_solvent	m-propoxyphenol	016533-50-9	30.5053	130.092
DMF	SBPA	Catalyst_solvent	disiloxane	013597-73-4	36.7213	134.217
DMF	SBPA	Catalyst_solvent	butylnonanoate	050623-57-9	42.0656	134.217
DMF	SBPB	Extraction_solvent	2-chloroaniline	000095-51-2	23.9572	138.586
DMF	SBPB	Extraction_solvent	2-chloroaniline	000095-51-2	23.9572	138.586
MeF	SBPB	Catalyst_solvent	n-heptane	000142-82-5	95.3727	139.539
DMF	SBPB	Extraction_solvent	n,n-diprop-2-yn-1-ylprop-2-yn-1-amine	006921-29-5	29.9126	149.529
DEF	SBPA	Extraction_solvent	3,5-dichloroaniline	000626-43-7	12.4107	153.746
DMF	SAPB	Extraction_solvent	vinyloxirane	000930-22-3	69.8281	154.45
MeF	SBPB	Extraction_solvent	2,5-dichloroaniline	000095-82-9	22.8683	154.803
DEF	SBPA	Extraction_solvent	4-fluoronitrobenzene	000350-46-9	29.7954	155.765
DMF	SBPB	Extraction_solvent	isobutanal	000078-84-2	139.585	156.922
MeF	SBPB	Extraction_solvent	2,3,4-trimethylphenol	000526-85-2	29.5301	157.246
DMF	SAPB	Extraction_solvent	ethylacetate	000141-78-6	146.275	157.303
DEF	SAPA	Extraction_solvent	3-chloropropene	000107-05-1	31.0753	160.36
MeF	SBPB	Extraction_solvent	a-ethynyl-a-methylbenzenemethanol	000127-66-2	29.6353	161.044
MeF	SBPB	Extraction_solvent	3-isopropyl-2-methylphenol	004371-48-6	28.3226	169.128
MeF	SBPB	Extraction_solvent	3,4-dichloroaniline	000095-76-1	23.0492	169.657
MeF	SBPB	Catalyst_solvent	ethylbenzene	000100-41-4	55.3562	170.518
DMF	SBPB	Extraction_solvent	4-(1,1-dimethylethyl)-2,6-dimethylphenol	000879-97-0	25.9633	171.701
DMF	SBPB	Extraction_solvent	4-(1,1-dimethylethyl)-2,6-dimethylphenol	000879-97-0	25.9633	171.701
MeF	SBPB	Extraction_solvent	1-naphthol	000090-15-3	30.0629	176.609
MeF	SBPB	Extraction_solvent	2,3,4,5-tetramethylphenol	000488-70-0	28.3235	185.234
MeF	SBPB	Extraction_solvent	p-(sec-butyl)phenol	000099-71-8	29.6178	186.926
MeF	SBPB	Extraction_solvent	4-(1-methyl-1-phenylethyl)-phenol	000599-64-4	26.9238	196.237
MeF	SBPB	Extraction_solvent	2-benzylphenol	028994-41-4	27.9884	197.499
MeF	SBPB	Extraction_solvent	2-isopropyl-6-methylpyrocatechol	000490-06-2	25.2316	199.557
MeF	SBPB	Extraction_solvent	4,4'-oxybisbenzeneamine	000101-80-4	27.1749	200.145
DMF	SBPB	Catalyst_solvent	2-methyl-1-pentanol	000105-30-6	43.8917	201.719
MeF	SBPB	Extraction_solvent	o,p-bisphenola	000837-08-1	29.8745	203.354
DMF	SAPA	Extraction_solvent	furazan	000288-37-9	46.5162	203.371
MeF	SBPB	Extraction_solvent	carbazole	000086-74-8	23.5634	211.147
MeF	SBPB	Extraction_solvent	2,3-dimethyl-1h-indole	000091-55-4	24.9338	213.988
MeF	SBPB	Extraction_solvent	flurbiprofen	005104-49-4	27.8115	218.653
DMF	SBPB	Catalyst_solvent	2-hexanol	000626-93-7	43.6457	220.437
MeF	SBPA	Catalyst_solvent	ethylbenzene	000100-41-4	58.063	224.041
MeF	SBPB	Extraction_solvent	desmedipham	013684-56-5	27.8282	240.92
MeF	SBPB	Extraction_solvent	silvex	000093-72-1	30.0893	245.145
MeF	SBPB	Extraction_solvent	4-bromoaniline	000106-40-1	23.2948	256.796
MeF	SBPB	Extraction_solvent	7h-dibenzo(c,g)carbazole	000194-59-2	21.8093	264.698
MeF	SBPB	Extraction_solvent	naproxen	022204-53-1	29.2768	305.348
MeF	SBPB	Extraction_solvent	tetrachlorohydroquinone	000087-87-6	22.7084	312.034
MeF	SBPB	Extraction_solvent	2,3,6-trimethylphenol	002416-94-6	24.5079	327.349
MeF	SBPB	Extraction_solvent	4-chloroaniline	000106-47-8	23.9835	342.251
DMF	SBPB	Extraction_solvent	indole	000120-72-9	25.9633	344.199
DMF	SBPB	Extraction_solvent	indole	000120-72-9	25.9633	344.199
DMF	SAPA	Extraction_solvent	3-methylfuran	000930-27-8	91.9652	365.925
DMF	SBPB	Extraction_solvent	hexyne	000693-02-7	235.377	423.493
MeF	SBPB	Extraction_solvent	ibuprofen	015687-27-1	28.672	443.334
DMF	SAPB	Extraction_solvent	Benzofuran	000271-89-6	54.5435	538.926
DMF	SBPA	Extraction_solvent	bis(2,2-dinitropropyl)amine	001924-47-6	12.5795	647.409
MeF	SBPB	Extraction_solvent	atrazine	001912-24-9	23.1922	691.586
Formic acid	SBPB	Extraction_solvent	2-cyclohexen-1-one	822-67-3	800.449	950.057
Formic acid	SBPB	Extraction_solvent	beta-propiolactone	127-91-3	583.003	1129.3
Formic acid	SBPB	Extraction_solvent	acrolein	260-94-6	740.843	1148.69
Formic acid	SBPB	Extraction_solvent	aceticacid	103-84-4	854.377	1159.26
Formic acid	SBPB	Extraction_solvent	cyclohexanone	108-93-0	750.942	1607.49
Formic acid	SBPB	Extraction_solvent	methylformate	123-39-7	1361.17	1711.42
DEF	SBPA	Extraction_solvent	2-ethylnitrobenzene	000612-22-6	31.7322	1765.31
Formic acid	SBPB	Extraction_solvent	acetylacetone	13831-30-6	1191.83	1772.63
Formic acid	SBPA	Extraction_solvent	acrolein	260-94-6	733.527	1874.27
Formic acid	SBPB	Extraction_solvent	2-hydroxypropanoicacidethylester	78-97-7	1447.92	1945.51
Formic acid	SBPB	Extraction_solvent	acrylicacid	107-02-8	1258.96	1946.99
Formic acid	SBPB	Extraction_solvent	2-tert-butoxy-propan-1-ol	616-45-5	1057.52	2127.44
Formic acid	SBPB	Extraction_solvent	1-methoxy-2-acetoxypropane	3036-66-6	724.264	2388.21
Formic acid	SBPB	Extraction_solvent	3-(methylthio)-propanal	10152-76-8	734.601	2402.15
DMF	SBPA	Extraction_solvent	2,6-diethylbenzeneamine	000579-66-8	30.4044	2539.68
Formic acid	SBPB	Extraction_solvent	2-ethoxy-propane	106-74-1	616.103	2585.4
Formic acid	SBPB	Extraction_solvent	2-hexanone	626-93-7	669.414	2588.92
Formic acid	SBPB	Extraction_solvent	(2-propenyloxy)methyl-oxirane	1126-75-6	585.744	2626.86
Formic acid	SBPB	Extraction_solvent	aceticanhydride	140-11-4	675.083	2838.22
DMF	SBPA	Extraction_solvent	eugenol	000097-53-0	28.5072	2840.2
Formic acid	SBPB	Extraction_solvent	5-methyl-2-hexanone	627-59-8	633.066	2896.95
Formic acid	SBPB	Extraction_solvent	2-propenenitrile	79-06-1	1563.51	2902.85
Formic acid	SBPB	Extraction_solvent	n-butylacetate	1119-49-9	696.312	2940.52
Formic acid	SBPA	Extraction_solvent	diethylether	111-90-0	597.224	3142.85
Formic acid	SBPB	Extraction_solvent	3-hexanol	2586-89-2	622.749	3158.65
Formic acid	SBPA	Extraction_solvent	dimethoxymethane	1112-39-6	546.814	3347.53
Formic acid	SBPB	Extraction_solvent	n-propylformate	1678-92-8	625.124	3597.94
Formic acid	SBPB	Extraction_solvent	3-methylhexanal	589-81-1	580.311	3641.78
Formic acid	SBPB	Extraction_solvent	2-hexanol	1679-06-7	579.999	3769.31
Formic acid	SBPA	Extraction_solvent	methylisopropylether	625-44-5	590.817	3830.88
DMF	SBPA	Extraction_solvent	2,4,6-trimethylbenzenamine	000088-05-1	20.0769	3913.44
Formic acid	SBPB	Extraction_solvent	3-cyclohexene-1-carboxaldehyde	822-66-2	817.35	4116.74
Formic acid	SBPB	Extraction_solvent	methylacrylate	105-45-3	844.624	4263.47
Formic acid	SBPB	Extraction_solvent	2-ethyl-1-butanol	1758-88-9	612.621	4373.68
Formic acid	SBPB	Extraction_solvent	2-methyl-1-butanol	4049-81-4	619.939	4647.42
Formic acid	SBPB	Extraction_solvent	ethylchloroacetate	105-54-4	597.618	4831.08
Formic acid	SBPA	Extraction_solvent	2,2-dimethyl-oxirane	15869-87-1	508.108	4884.58
Formic acid	SBPB	Extraction_solvent	n-pentylacetate	2050-92-2	495.172	4902.02
Formic acid	SBPB	Extraction_solvent	chloroaceticacidmethylester	590-02-3	623.516	5431.26
Formic acid	SBPB	Extraction_solvent	propylmethacrylate	557-00-6	540.894	5432.19
Formic acid	SBPB	Extraction_solvent	4-heptanone	589-55-9	623.468	5432.57
Formic acid	SBPB	Extraction_solvent	2-propenoicacid-2-methylpropylester	818-61-1	917.689	5518.11
Formic acid	SBPB	Extraction_solvent	2-propenoicacidbutylester	106-63-8	602.565	5603.38
Formic acid	SBPB	Extraction_solvent	diethylcarbonate	88-10-8	612.319	5874.62
Formic acid	SBPB	Extraction_solvent	formicacidhexylester	112-23-2	561.466	6159.59
Formic acid	SBPB	Extraction_solvent	formicacidpentylester	112-32-3	540.326	6534.43
Formic acid	SBPB	Extraction_solvent	methylisobutylether	83-34-1	728.255	6597.76
Formic acid	SBPB	Extraction_solvent	hexanenitrile	627-91-8	798.293	6845.18
Formic acid	SBPB	Extraction_solvent	n-butylpropionate	1538-74-5	630.761	7072.4
Formic acid	SBPB	Extraction_solvent	ethylpropylether	30453-31-7	619.498	7325.6
Formic acid	SBPB	Extraction_solvent	isobutylmethacrylate	589-59-3	512.696	7336.35
Formic acid	SBPB	Extraction_solvent	2-ethyl-hexanal	3208-16-0	761.501	7468.17
Formic acid	SBPB	Extraction_solvent	3-heptanone	589-82-2	627.862	7723.84
Formic acid	SBPB	Extraction_solvent	2-methylhexanal	592-27-8	574.815	7777.96
Formic acid	SBPB	Extraction_solvent	2-methylheptanal	534-22-5	843.095	7970.24
Formic acid	SBPB	Extraction_solvent	3-methylbutanoicacidethylester	659-70-1	505.164	8101.6
Formic acid	SBPB	Extraction_solvent	2-methyl-2-propenoicacidbutylester	96-05-9	636.009	8141.29
Formic acid	SBPB	Extraction_solvent	n-propylbutyrate	60956-33-4	695.433	8396.82
Formic acid	SBPB	Extraction_solvent	4-methylene-2-oxetanone	7372-88-5	740.637	9156
Formic acid	SBPB	Extraction_solvent	sulfurousaciddiethylester	540-82-9	1168.28	9170.82
Formic acid	SBPB	Extraction_solvent	methyl-tert-amylether	1634-04-4	690.433	9247.25
Formic acid	SBPB	Extraction_solvent	2,3-dihydrofuran	496-16-2	745.324	11323.4
DEF	SBPA	Extraction_solvent	2-methyl-1-dodecanol	022663-61-2	32.2308	11885.8
DEF	SBPA	Extraction_solvent	1-chloro-2-nitro-4-(trifluoromethyl)-benzene	000121-17-5	31.2004	13393.3
DEF	SBPA	Extraction_solvent	1-nitro-3-(trifluoromethyl)-benzene	000098-46-4	30.9623	15068.8
DEF	SBPA	Extraction_solvent	safrole	000094-59-7	30.9967	15645.7
Formic acid	SBPB	Extraction_solvent	chloroacetaldehyde	811-62-1	710.426	18293.6
Formic acid	SBPA	Extraction_solvent	2-methyl-2-propenoicacidbutylester	96-05-9	638.911	19811.9
Formic acid	SBPB	Extraction_solvent	triethylesterphosphorousacid	23305-64-8	522.286	24306.4
DMF	SBPB	Extraction_solvent	2,4,6-trimethylphenol	000527-60-6	29.8428	34383.3
Formic acid	SBPB	Extraction_solvent	isocyanatomethane	103-71-9	809.954	111591
Formic acid	SBPB	Extraction_solvent	1,4-dichloro-trans-2-butene	626-92-6	624.861	165069
Formic acid	SBPB	Extraction_solvent	1,4-dichlorobutane	106-46-7	726.585	194781
Formic acid	SBPB	Extraction_solvent	1,2,3-trichloropropane	87-61-6	681.191	320359
Formic acid	SBPB	Extraction_solvent	ethylhydroperoxide	4114-31-2	1206.74	481134
Formic acid	SBPA	Extraction_solvent	2-ethoxyethanolacetate	110-76-9	702.176	1.90375e+06
Formic acid	SBPB	Extraction_solvent	methylisopropylether	625-44-5	641.982	4.59804e+07
