# Supplementary material for: CO from CO2and fluctuating renewable energy via formic-acid derivatives
Source: Royal Society of Chemistry journal article supplement (doi:10.1039/c6gc01202g), 2016-01-01
Supplement: c6gc01202g10.log [file c6gc01202g10.log]

 Entering Gaussian System, Link 0=/opt/mbfd/GAUSSIAN/LINUX64/g03.e01/g03
 Input=EtF_opt_freq_new_conformer.com
 Output=EtF_opt_freq_new_conformer.log
 Initial command:
 /opt/mbfd/GAUSSIAN/LINUX64/g03.e01/l1.exe /gaussianscratch/Gau-25393.inp -scrdir=/gaussianscratch/
 Entering Link 1 = /opt/mbfd/GAUSSIAN/LINUX64/g03.e01/l1.exe PID=     25397.
  
 Copyright (c) 1988,1990,1992,1993,1995,1998,2003,2004,2007, Gaussian, Inc.
                  All Rights Reserved.
  
 This is the Gaussian(R) 03 program.  It is based on the
 the Gaussian(R) 98 system (copyright 1998, Gaussian, Inc.),
 the Gaussian(R) 94 system (copyright 1995, Gaussian, Inc.),
 the Gaussian 92(TM) system (copyright 1992, Gaussian, Inc.),
 the Gaussian 90(TM) system (copyright 1990, Gaussian, Inc.),
 the Gaussian 88(TM) system (copyright 1988, Gaussian, Inc.),
 the Gaussian 86(TM) system (copyright 1986, Carnegie Mellon
 University), and the Gaussian 82(TM) system (copyright 1983,
 Carnegie Mellon University). Gaussian is a federally registered
 trademark of Gaussian, Inc.
  
 This software contains proprietary and confidential information,
 including trade secrets, belonging to Gaussian, Inc.
  
 This software is provided under written license and may be
 used, copied, transmitted, or stored only in accord with that
 written license.
  
 The following legend is applicable only to US Government
 contracts under FAR:
  
                    RESTRICTED RIGHTS LEGEND
  
 Use, reproduction and disclosure by the US Government is
 subject to restrictions as set forth in subparagraphs (a)
 and (c) of the Commercial Computer Software - Restricted
 Rights clause in FAR 52.227-19.
  
 Gaussian, Inc.
 340 Quinnipiac St., Bldg. 40, Wallingford CT 06492
  
  
 ---------------------------------------------------------------
 Warning -- This program may not be used in any manner that
 competes with the business of Gaussian, Inc. or will provide
 assistance to any competitor of Gaussian, Inc.  The licensee
 of this program is prohibited from giving any competitor of
 Gaussian, Inc. access to this program.  By using this program,
 the user acknowledges that Gaussian, Inc. is engaged in the
 business of creating and licensing software in the field of
 computational chemistry and represents and warrants to the
 licensee that it is not a competitor of Gaussian, Inc. and that
 it will not use this program in any manner prohibited above.
 ---------------------------------------------------------------
  

 Cite this work as:
 Gaussian 03, Revision E.01,
 M. J. Frisch, G. W. Trucks, H. B. Schlegel, G. E. Scuseria, 
 M. A. Robb, J. R. Cheeseman, J. A. Montgomery, Jr., T. Vreven, 
 K. N. Kudin, J. C. Burant, J. M. Millam, S. S. Iyengar, J. Tomasi, 
 V. Barone, B. Mennucci, M. Cossi, G. Scalmani, N. Rega, 
 G. A. Petersson, H. Nakatsuji, M. Hada, M. Ehara, K. Toyota, 
 R. Fukuda, J. Hasegawa, M. Ishida, T. Nakajima, Y. Honda, O. Kitao, 
 H. Nakai, M. Klene, X. Li, J. E. Knox, H. P. Hratchian, J. B. Cross, 
 V. Bakken, C. Adamo, J. Jaramillo, R. Gomperts, R. E. Stratmann, 
 O. Yazyev, A. J. Austin, R. Cammi, C. Pomelli, J. W. Ochterski, 
 P. Y. Ayala, K. Morokuma, G. A. Voth, P. Salvador, J. J. Dannenberg, 
 V. G. Zakrzewski, S. Dapprich, A. D. Daniels, M. C. Strain, 
 O. Farkas, D. K. Malick, A. D. Rabuck, K. Raghavachari, 
 J. B. Foresman, J. V. Ortiz, Q. Cui, A. G. Baboul, S. Clifford, 
 J. Cioslowski, B. B. Stefanov, G. Liu, A. Liashenko, P. Piskorz, 
 I. Komaromi, R. L. Martin, D. J. Fox, T. Keith, M. A. Al-Laham, 
 C. Y. Peng, A. Nanayakkara, M. Challacombe, P. M. W. Gill, 
 B. Johnson, W. Chen, M. W. Wong, C. Gonzalez, and J. A. Pople, 
 Gaussian, Inc., Wallingford CT, 2004.
 
 ******************************************
 Gaussian 03:  AM64L-G03RevE.01 11-Sep-2007
                27-Jan-2014 
 ******************************************
 %chk=EtF_opt_freq_new_conformer.chk
 %mem=2000MB
 %nprocshared=1
 Will use up to    1 processors via shared memory.
 Default route: MaxDisk=200000000
 -----------------------------------------------------------------
 # opt=(tight,calcall) freq B3LYP TZVP int=ultrafine maxdisk=300GB
 -----------------------------------------------------------------
 1/7=10,10=4,14=-1,18=20,26=3,38=1/1,3;
 2/9=110,17=6,18=5,40=1/2;
 3/5=19,7=101,11=2,16=1,25=1,30=1,74=-5,75=5/1,2,3;
 4//1;
 5/5=2,38=5/2;
 8/6=4,10=90,11=11/1;
 11/6=1,8=1,9=11,15=111,16=1/1,2,10;
 10/6=1/2;
 6/7=2,8=2,9=2,10=2,18=1,28=1/1;
 7/10=1,25=1/1,2,3,16;
 1/10=4,14=-1,18=20/3(3);
 2/9=110/2;
 7/8=1,9=1,25=1,44=-1/16;
 99//99;
 2/9=110/2;
 3/5=19,7=101,11=2,16=1,25=1,30=1,74=-5,75=5/1,2,3;
 4/5=5,16=3/1;
 5/5=2,38=5/2;
 8/6=4,10=90,11=11/1;
 11/6=1,8=1,9=11,15=111,16=1/1,2,10;
 10/6=1/2;
 7/10=1,25=1/1,2,3,16;
 1/10=4,14=-1,18=20/3(-8);
 2/9=110/2;
 6/7=2,8=2,9=2,10=2,18=1,19=2,28=1/1;
 7/8=1,9=1,25=1,44=-1/16;
 99//99;
 -------------------
 Title Card Required
 -------------------
 Symbolic Z-matrix:
 Charge =  0 Multiplicity = 1
 C                    -1.41171   0.45047  -0.00574 
 H                    -1.94832   1.40854  -0.01517 
 O                    -1.93851  -0.62913  -0.01684 
 O                    -0.09412   0.68519   0.01975 
 C                     0.77573  -0.47965   0.0299 
 H                     0.57338  -1.05347   0.93587 
 H                     0.52532  -1.10728  -0.82659 
 C                     2.20368   0.01395  -0.02453 
 H                     2.4333    0.64589   0.83446 
 H                     2.88631  -0.83829  -0.0151 
 H                     2.38485   0.58748  -0.93455 
 

 GradGradGradGradGradGradGradGradGradGradGradGradGradGradGradGradGradGrad
 Berny optimization.
 Initialization pass.
                           ----------------------------
                           !    Initial Parameters    !
                           ! (Angstroms and Degrees)  !
 --------------------------                            --------------------------
 ! Name  Definition              Value          Derivative Info.                !
 --------------------------------------------------------------------------------
 ! R1    R(1,2)                  1.0981         calculate D2E/DX2 analytically  !
 ! R2    R(1,3)                  1.2013         calculate D2E/DX2 analytically  !
 ! R3    R(1,4)                  1.3386         calculate D2E/DX2 analytically  !
 ! R4    R(4,5)                  1.4538         calculate D2E/DX2 analytically  !
 ! R5    R(5,6)                  1.0913         calculate D2E/DX2 analytically  !
 ! R6    R(5,7)                  1.091          calculate D2E/DX2 analytically  !
 ! R7    R(5,8)                  1.5118         calculate D2E/DX2 analytically  !
 ! R8    R(8,9)                  1.0908         calculate D2E/DX2 analytically  !
 ! R9    R(8,10)                 1.092          calculate D2E/DX2 analytically  !
 ! R10   R(8,11)                 1.0908         calculate D2E/DX2 analytically  !
 ! A1    A(2,1,3)              124.7282         calculate D2E/DX2 analytically  !
 ! A2    A(2,1,4)              109.1577         calculate D2E/DX2 analytically  !
 ! A3    A(3,1,4)              126.1141         calculate D2E/DX2 analytically  !
 ! A4    A(1,4,5)              116.6525         calculate D2E/DX2 analytically  !
 ! A5    A(4,5,6)              108.4296         calculate D2E/DX2 analytically  !
 ! A6    A(4,5,7)              108.5499         calculate D2E/DX2 analytically  !
 ! A7    A(4,5,8)              107.6547         calculate D2E/DX2 analytically  !
 ! A8    A(6,5,7)              107.8595         calculate D2E/DX2 analytically  !
 ! A9    A(6,5,8)              112.1284         calculate D2E/DX2 analytically  !
 ! A10   A(7,5,8)              112.1086         calculate D2E/DX2 analytically  !
 ! A11   A(5,8,9)              111.0763         calculate D2E/DX2 analytically  !
 ! A12   A(5,8,10)             109.5926         calculate D2E/DX2 analytically  !
 ! A13   A(5,8,11)             111.0119         calculate D2E/DX2 analytically  !
 ! A14   A(9,8,10)             108.2852         calculate D2E/DX2 analytically  !
 ! A15   A(9,8,11)             108.5046         calculate D2E/DX2 analytically  !
 ! A16   A(10,8,11)            108.2841         calculate D2E/DX2 analytically  !
 ! D1    D(2,1,4,5)           -179.7583         calculate D2E/DX2 analytically  !
 ! D2    D(3,1,4,5)              0.2412         calculate D2E/DX2 analytically  !
 ! D3    D(1,4,5,6)            -61.7975         calculate D2E/DX2 analytically  !
 ! D4    D(1,4,5,7)             55.1258         calculate D2E/DX2 analytically  !
 ! D5    D(1,4,5,8)            176.687          calculate D2E/DX2 analytically  !
 ! D6    D(4,5,8,9)             60.2075         calculate D2E/DX2 analytically  !
 ! D7    D(4,5,8,10)           179.8167         calculate D2E/DX2 analytically  !
 ! D8    D(4,5,8,11)           -60.6158         calculate D2E/DX2 analytically  !
 ! D9    D(6,5,8,9)            -58.9731         calculate D2E/DX2 analytically  !
 ! D10   D(6,5,8,10)            60.6361         calculate D2E/DX2 analytically  !
 ! D11   D(6,5,8,11)          -179.7965         calculate D2E/DX2 analytically  !
 ! D12   D(7,5,8,9)            179.5245         calculate D2E/DX2 analytically  !
 ! D13   D(7,5,8,10)           -60.8663         calculate D2E/DX2 analytically  !
 ! D14   D(7,5,8,11)            58.7012         calculate D2E/DX2 analytically  !
 --------------------------------------------------------------------------------
 Trust Radius=3.00D-01 FncErr=1.00D-07 GrdErr=1.00D-06
 Number of steps in this run=  50 maximum allowed number of steps= 100.
 GradGradGradGradGradGradGradGradGradGradGradGradGradGradGradGradGradGrad

                          Input orientation:                          
 ---------------------------------------------------------------------
 Center     Atomic     Atomic              Coordinates (Angstroms)
 Number     Number      Type              X           Y           Z
 ---------------------------------------------------------------------
    1          6             0       -1.411714    0.450473   -0.005744
    2          1             0       -1.948322    1.408538   -0.015170
    3          8             0       -1.938505   -0.629126   -0.016843
    4          8             0       -0.094123    0.685192    0.019752
    5          6             0        0.775731   -0.479652    0.029902
    6          1             0        0.573380   -1.053466    0.935867
    7          1             0        0.525320   -1.107282   -0.826587
    8          6             0        2.203681    0.013946   -0.024525
    9          1             0        2.433302    0.645894    0.834464
   10          1             0        2.886306   -0.838285   -0.015095
   11          1             0        2.384849    0.587477   -0.934548
 ---------------------------------------------------------------------
                    Distance matrix (angstroms):
                    1          2          3          4          5
     1  C    0.000000
     2  H    1.098146   0.000000
     3  O    1.201318   2.037688   0.000000
     4  O    1.338577   1.990604   2.265064   0.000000
     5  C    2.377250   3.314779   2.718751   1.453826   0.000000
     6  H    2.662529   3.650331   2.719795   2.075514   1.091321
     7  H    2.617725   3.620311   2.637186   2.076767   1.090962
     8  C    3.641701   4.379966   4.191814   2.394250   1.511834
     9  H    3.940595   4.527928   4.632828   2.655782   2.159101
    10  H    4.487088   5.331214   4.829343   3.347410   2.141301
    11  H    3.910925   4.505082   4.584070   2.658108   2.158284
                    6          7          8          9         10
     6  H    0.000000
     7  H    1.763930   0.000000
     8  C    2.172465   2.171946   0.000000
     9  H    2.521392   3.077842   1.090847   0.000000
    10  H    2.510032   2.511002   1.091954   1.769110   0.000000
    11  H    3.077753   2.518276   1.090826   1.770639   1.769082
                   11
    11  H    0.000000
 Stoichiometry    C3H6O2
 Framework group  C1[X(C3H6O2)]
 Deg. of freedom    27
 Full point group                 C1
 Largest Abelian subgroup         C1      NOp   1
 Largest concise Abelian subgroup C1      NOp   1
                         Standard orientation:                         
 ---------------------------------------------------------------------
 Center     Atomic     Atomic              Coordinates (Angstroms)
 Number     Number      Type              X           Y           Z
 ---------------------------------------------------------------------
    1          6             0       -1.411714    0.450473   -0.005744
    2          1             0       -1.948322    1.408538   -0.015170
    3          8             0       -1.938505   -0.629126   -0.016843
    4          8             0       -0.094123    0.685192    0.019752
    5          6             0        0.775731   -0.479652    0.029902
    6          1             0        0.573380   -1.053466    0.935867
    7          1             0        0.525320   -1.107282   -0.826587
    8          6             0        2.203681    0.013946   -0.024525
    9          1             0        2.433302    0.645894    0.834464
   10          1             0        2.886306   -0.838285   -0.015095
   11          1             0        2.384849    0.587477   -0.934548
 ---------------------------------------------------------------------
 Rotational constants (GHZ):     18.0666589      2.8580753      2.5468487
 Standard basis: TZVP (5D, 7F)
 There are   131 symmetry adapted basis functions of A   symmetry.
 Integral buffers will be    131072 words long.
 Raffenetti 2 integral format.
 Two-electron integral symmetry is turned on.
   131 basis functions,   223 primitive gaussians,   136 cartesian basis functions
    20 alpha electrons       20 beta electrons
       nuclear repulsion energy       177.2179120484 Hartrees.
 NAtoms=   11 NActive=   11 NUniq=   11 SFac= 7.50D-01 NAtFMM=   80 NAOKFM=F Big=F
 One-electron integrals computed using PRISM.
 NBasis=   131 RedAO= T  NBF=   131
 NBsUse=   131 1.00D-06 NBFU=   131
 Harris functional with IExCor=  402 diagonalized for initial guess.
 ExpMin= 9.52D-02 ExpMax= 2.70D+04 ExpMxC= 9.22D+02 IAcc=3 IRadAn=         5 AccDes= 0.00D+00
 HarFok:  IExCor= 402 AccDes= 0.00D+00 IRadAn=         5 IDoV=1
 ScaDFX=  1.000000  1.000000  1.000000  1.000000
 Initial guess orbital symmetries:
       Occupied  (A) (A) (A) (A) (A) (A) (A) (A) (A) (A) (A) (A)
                 (A) (A) (A) (A) (A) (A) (A) (A)
       Virtual   (A) (A) (A) (A) (A) (A) (A) (A) (A) (A) (A) (A)
                 (A) (A) (A) (A) (A) (A) (A) (A) (A) (A) (A) (A)
                 (A) (A) (A) (A) (A) (A) (A) (A) (A) (A) (A) (A)
                 (A) (A) (A) (A) (A) (A) (A) (A) (A) (A) (A) (A)
                 (A) (A) (A) (A) (A) (A) (A) (A) (A) (A) (A) (A)
                 (A) (A) (A) (A) (A) (A) (A) (A) (A) (A) (A) (A)
                 (A) (A) (A) (A) (A) (A) (A) (A) (A) (A) (A) (A)
                 (A) (A) (A) (A) (A) (A) (A) (A) (A) (A) (A) (A)
                 (A) (A) (A) (A) (A) (A) (A) (A) (A) (A) (A) (A)
                 (A) (A) (A)
 The electronic state of the initial guess is 1-A.
 Requested convergence on RMS density matrix=1.00D-08 within 128 cycles.
 Requested convergence on MAX density matrix=1.00D-06.
 Requested convergence on             energy=1.00D-06.
 No special actions if energy rises.
 Keep R1 integrals in memory in canonical form, NReq=    45838121.
 Integral accuracy reduced to 1.0D-05 until final iterations.
 Initial convergence to 1.0D-05 achieved.  Increase integral accuracy.
 SCF Done:  E(RB+HF-LYP) =  -268.485732165     A.U. after   14 cycles
             Convg  =    0.2801D-08             -V/T =  2.0046
             S**2   =   0.0000
 Range of M.O.s used for correlation:     1   131
 NBasis=   131 NAE=    20 NBE=    20 NFC=     0 NFV=     0
 NROrb=    131 NOA=    20 NOB=    20 NVA=   111 NVB=   111

 **** Warning!!: The largest alpha MO coefficient is  0.16002759D+02

 Symmetrizing basis deriv contribution to polar:
 IMax=3 JMax=2 DiffMx= 0.00D+00
 G2DrvN: will do   12 centers at a time, making    1 passes doing MaxLOS=2.
 FoFDir/FoFCou used for L=0 through L=2.
 DoAtom=TTTTTTTTTTT
          Differentiating once with respect to electric field.
                with respect to dipole field.
          Differentiating once with respect to nuclear coordinates.
          Store integrals in memory, NReq=    44219734.
          There are  36 degrees of freedom in the 1st order CPHF.
    33 vectors were produced by pass  0.
 AX will form  33 AO Fock derivatives at one time.
    33 vectors were produced by pass  1.
    33 vectors were produced by pass  2.
    33 vectors were produced by pass  3.
    33 vectors were produced by pass  4.
    21 vectors were produced by pass  5.
     5 vectors were produced by pass  6.
     1 vectors were produced by pass  7.
 Inv2:  IOpt= 1 Iter= 1 AM= 1.75D-15 Conv= 1.00D-12.
 Inverted reduced A of dimension  192 with in-core refinement.
 Isotropic polarizability for W=    0.000000       43.01 Bohr**3.
 End of Minotr Frequency-dependent properties file   721 does not exist.

 **********************************************************************

            Population analysis using the SCF density.

 **********************************************************************

 Orbital symmetries:
       Occupied  (A) (A) (A) (A) (A) (A) (A) (A) (A) (A) (A) (A)
                 (A) (A) (A) (A) (A) (A) (A) (A)
       Virtual   (A) (A) (A) (A) (A) (A) (A) (A) (A) (A) (A) (A)
                 (A) (A) (A) (A) (A) (A) (A) (A) (A) (A) (A) (A)
                 (A) (A) (A) (A) (A) (A) (A) (A) (A) (A) (A) (A)
                 (A) (A) (A) (A) (A) (A) (A) (A) (A) (A) (A) (A)
                 (A) (A) (A) (A) (A) (A) (A) (A) (A) (A) (A) (A)
                 (A) (A) (A) (A) (A) (A) (A) (A) (A) (A) (A) (A)
                 (A) (A) (A) (A) (A) (A) (A) (A) (A) (A) (A) (A)
                 (A) (A) (A) (A) (A) (A) (A) (A) (A) (A) (A) (A)
                 (A) (A) (A) (A) (A) (A) (A) (A) (A) (A) (A) (A)
                 (A) (A) (A)
 The electronic state is 1-A.
 Alpha  occ. eigenvalues --  -19.18404 -19.12724 -10.30670 -10.24042 -10.17898
 Alpha  occ. eigenvalues --   -1.11783  -1.03471  -0.79040  -0.67361  -0.59415
 Alpha  occ. eigenvalues --   -0.53818  -0.50545  -0.48112  -0.43356  -0.41645
 Alpha  occ. eigenvalues --   -0.40824  -0.37585  -0.36649  -0.31907  -0.29462
 Alpha virt. eigenvalues --   -0.00980   0.03342   0.07273   0.07885   0.09188
 Alpha virt. eigenvalues --    0.09439   0.10365   0.12391   0.14695   0.16221
 Alpha virt. eigenvalues --    0.18608   0.20733   0.21565   0.22518   0.27414
 Alpha virt. eigenvalues --    0.29339   0.30708   0.32898   0.36560   0.40195
 Alpha virt. eigenvalues --    0.40757   0.41177   0.41944   0.43276   0.45387
 Alpha virt. eigenvalues --    0.46293   0.48404   0.50781   0.53277   0.53600
 Alpha virt. eigenvalues --    0.55852   0.59831   0.62049   0.67123   0.70661
 Alpha virt. eigenvalues --    0.80617   0.88336   1.14479   1.16356   1.23048
 Alpha virt. eigenvalues --    1.24868   1.26246   1.28008   1.29029   1.30888
 Alpha virt. eigenvalues --    1.31174   1.37846   1.39568   1.39700   1.40682
 Alpha virt. eigenvalues --    1.45664   1.52371   1.52851   1.57003   1.61757
 Alpha virt. eigenvalues --    1.63526   1.71899   1.71967   1.75549   1.77827
 Alpha virt. eigenvalues --    1.78527   1.84731   1.85658   1.90746   1.97955
 Alpha virt. eigenvalues --    2.01716   2.07861   2.13340   2.17159   2.22446
 Alpha virt. eigenvalues --    2.29215   2.29914   2.33715   2.40932   2.47516
 Alpha virt. eigenvalues --    2.48718   2.52379   2.56013   2.56862   2.61014
 Alpha virt. eigenvalues --    2.61295   2.62645   2.64976   2.66785   2.67315
 Alpha virt. eigenvalues --    2.69808   2.70352   2.73588   2.89650   2.92601
 Alpha virt. eigenvalues --    2.94333   2.95893   3.04370   3.06980   3.09848
 Alpha virt. eigenvalues --    3.17620   3.25541   3.25872   3.30491   3.31443
 Alpha virt. eigenvalues --    3.35959   3.36308   3.56192   3.85711   4.08561
 Alpha virt. eigenvalues --    4.23864  21.86857  22.01342  22.03151  43.39318
 Alpha virt. eigenvalues --   43.51305
          Condensed to atoms (all electrons):
              1          2          3          4          5          6
     1  C    4.598895   0.414524   0.549154   0.260520  -0.049912  -0.007660
     2  H    0.414524   0.644875  -0.058884  -0.098660   0.006107  -0.000006
     3  O    0.549154  -0.058884   7.931116  -0.112127  -0.000179   0.005366
     4  O    0.260520  -0.098660  -0.112127   8.107624   0.197091  -0.040274
     5  C   -0.049912   0.006107  -0.000179   0.197091   4.956382   0.418662
     6  H   -0.007660  -0.000006   0.005366  -0.040274   0.418662   0.581006
     7  H   -0.009572   0.000208   0.008028  -0.041334   0.420485  -0.044414
     8  C    0.016520   0.001627   0.006298  -0.073344   0.250430  -0.043719
     9  H   -0.000578  -0.000146  -0.000048   0.002424  -0.033062  -0.009050
    10  H   -0.000047   0.000044   0.000095   0.006138  -0.038073  -0.000210
    11  H   -0.000293  -0.000132  -0.000053   0.003088  -0.036006   0.008510
              7          8          9         10         11
     1  C   -0.009572   0.016520  -0.000578  -0.000047  -0.000293
     2  H    0.000208   0.001627  -0.000146   0.000044  -0.000132
     3  O    0.008028   0.006298  -0.000048   0.000095  -0.000053
     4  O   -0.041334  -0.073344   0.002424   0.006138   0.003088
     5  C    0.420485   0.250430  -0.033062  -0.038073  -0.036006
     6  H   -0.044414  -0.043719  -0.009050  -0.000210   0.008510
     7  H    0.578571  -0.044186   0.008416  -0.000126  -0.009267
     8  C   -0.044186   5.002957   0.400938   0.394752   0.403768
     9  H    0.008416   0.400938   0.563390  -0.027007  -0.028734
    10  H   -0.000126   0.394752  -0.027007   0.574309  -0.026934
    11  H   -0.009267   0.403768  -0.028734  -0.026934   0.562564
 Mulliken atomic charges:
              1
     1  C    0.228448
     2  H    0.090443
     3  O   -0.328765
     4  O   -0.211146
     5  C   -0.091925
     6  H    0.131790
     7  H    0.133191
     8  C   -0.316041
     9  H    0.123458
    10  H    0.117058
    11  H    0.123488
 Sum of Mulliken charges=   0.00000
 Atomic charges with hydrogens summed into heavy atoms:
              1
     1  C    0.318892
     2  H    0.000000
     3  O   -0.328765
     4  O   -0.211146
     5  C    0.173056
     6  H    0.000000
     7  H    0.000000
     8  C    0.047964
     9  H    0.000000
    10  H    0.000000
    11  H    0.000000
 Sum of Mulliken charges=   0.00000
 APT atomic charges:
              1
     1  C    1.123051
     2  H   -0.017418
     3  O   -0.702386
     4  O   -0.885192
     5  C    0.519992
     6  H   -0.037725
     7  H   -0.033126
     8  C    0.046102
     9  H   -0.003830
    10  H   -0.005627
    11  H   -0.003842
 Sum of APT charges=   0.00000
 APT Atomic charges with hydrogens summed into heavy atoms:
              1
     1  C    1.105633
     2  H    0.000000
     3  O   -0.702386
     4  O   -0.885192
     5  C    0.449141
     6  H    0.000000
     7  H    0.000000
     8  C    0.032803
     9  H    0.000000
    10  H    0.000000
    11  H    0.000000
 Sum of APT charges=   0.00000
 Electronic spatial extent (au):  <R**2>=   489.3592
 Charge=     0.0000 electrons
 Dipole moment (field-independent basis, Debye):
    X=     2.0654    Y=     0.7810    Z=     0.0207  Tot=     2.2082
 Quadrupole moment (field-independent basis, Debye-Ang):
   XX=   -32.3833   YY=   -31.2144   ZZ=   -29.6122
   XY=    -5.4226   XZ=    -0.0292   YZ=    -0.0743
 Traceless Quadrupole moment (field-independent basis, Debye-Ang):
   XX=    -1.3133   YY=    -0.1445   ZZ=     1.4578
   XY=    -5.4226   XZ=    -0.0292   YZ=    -0.0743
 Octapole moment (field-independent basis, Debye-Ang**2):
  XXX=     5.2733  YYY=     0.8195  ZZZ=     0.0605  XYY=    -1.7933
  XXY=     9.4915  XXZ=     0.1974  XZZ=    -2.1528  YZZ=    -0.0288
  YYZ=    -0.0114  XYZ=     0.0715
 Hexadecapole moment (field-independent basis, Debye-Ang**3):
 XXXX=  -518.1870 YYYY=   -97.8100 ZZZZ=   -41.9985 XXXY=   -19.3418
 XXXZ=    -0.0611 YYYX=    -4.0067 YYYZ=     0.1400 ZZZX=     0.0134
 ZZZY=    -0.1467 XXYY=   -95.5286 XXZZ=   -88.8911 YYZZ=   -22.6376
 XXYZ=    -0.0570 YYXZ=     0.1865 ZZXY=     1.9911
 N-N= 1.772179120484D+02 E-N=-9.831243392258D+02  KE= 2.672602437885D+02
  Exact polarizability:  52.745   0.161  42.717   0.196  -0.048  33.561
 Approx polarizability:  63.219   5.532  63.361   0.429   0.098  45.941
 ***** Axes restored to original set *****
 -------------------------------------------------------------------
 Center     Atomic                   Forces (Hartrees/Bohr)
 Number     Number              X              Y              Z
 -------------------------------------------------------------------
    1          6          -0.000066995   -0.000050883    0.000173859
    2          1           0.000005996    0.000005238   -0.000001039
    3          8           0.000004342    0.000020512   -0.000000858
    4          8           0.000059697    0.000019145   -0.000194349
    5          6           0.000001118    0.000044493   -0.000146052
    6          1           0.000009491   -0.000014383    0.000008043
    7          1          -0.000009543   -0.000019826    0.000004669
    8          6          -0.000032466   -0.000042232    0.000150497
    9          1           0.000017109    0.000012177   -0.000003180
   10          1          -0.000003910    0.000008081    0.000005920
   11          1           0.000015162    0.000017678    0.000002491
 -------------------------------------------------------------------
 Cartesian Forces:  Max     0.000194349 RMS     0.000062835

 GradGradGradGradGradGradGradGradGradGradGradGradGradGradGradGradGradGrad
 Berny optimization.
 Internal  Forces:  Max     0.000208787 RMS     0.000048291
 Search for a local minimum.
 Step number   1 out of a maximum of  50
 All quantities printed in internal units (Hartrees-Bohrs-Radians)
 Second derivative matrix not updated -- analytic derivatives used.
     Eigenvalues ---    0.00206   0.00262   0.02281   0.04362   0.04493
     Eigenvalues ---    0.04683   0.06126   0.09494   0.12024   0.12532
     Eigenvalues ---    0.13424   0.13976   0.16568   0.17212   0.22399
     Eigenvalues ---    0.23864   0.26323   0.30251   0.32314   0.33201
     Eigenvalues ---    0.33301   0.33707   0.33724   0.34531   0.35352
     Eigenvalues ---    0.43626   0.885951000.000001000.000001000.00000
     Eigenvalues --- 1000.000001000.000001000.000001000.000001000.00000
     Eigenvalues --- 1000.000001000.000001000.000001000.000001000.00000
 RFO step:  Lambda=-2.26440482D-05.
 Linear search not attempted -- first point.
 Iteration  1 RMS(Cart)=  0.02663887 RMS(Int)=  0.00045587
 Iteration  2 RMS(Cart)=  0.00066110 RMS(Int)=  0.00000016
 Iteration  3 RMS(Cart)=  0.00000021 RMS(Int)=  0.00000008
 Variable       Old X    -DE/DX   Delta X   Delta X   Delta X     New X
                                 (Linear)    (Quad)   (Total)
    R1        2.07520   0.00000   0.00000   0.00001   0.00001   2.07520
    R2        2.27016  -0.00002   0.00000  -0.00004  -0.00004   2.27012
    R3        2.52954   0.00006   0.00000   0.00013   0.00013   2.52967
    R4        2.74733  -0.00001   0.00000  -0.00013  -0.00013   2.74721
    R5        2.06230   0.00001   0.00000  -0.00026  -0.00026   2.06204
    R6        2.06162   0.00001   0.00000   0.00042   0.00042   2.06204
    R7        2.85695  -0.00001   0.00000  -0.00013  -0.00013   2.85683
    R8        2.06140   0.00001   0.00000   0.00002   0.00002   2.06142
    R9        2.06349  -0.00001   0.00000  -0.00003  -0.00003   2.06346
   R10        2.06136   0.00001   0.00000   0.00005   0.00005   2.06142
    A1        2.17692   0.00000   0.00000   0.00018   0.00018   2.17709
    A2        1.90516  -0.00001   0.00000   0.00006   0.00006   1.90522
    A3        2.20111   0.00001   0.00000  -0.00023  -0.00023   2.20087
    A4        2.03597  -0.00001   0.00000  -0.00068  -0.00068   2.03529
    A5        1.89245   0.00001   0.00000   0.00127   0.00127   1.89373
    A6        1.89455  -0.00001   0.00000  -0.00084  -0.00084   1.89371
    A7        1.87893   0.00002   0.00000  -0.00001  -0.00001   1.87892
    A8        1.88250  -0.00001   0.00000  -0.00034  -0.00034   1.88217
    A9        1.95701  -0.00011   0.00000  -0.00021  -0.00021   1.95680
   A10        1.95666   0.00010   0.00000   0.00014   0.00014   1.95680
   A11        1.93865   0.00002   0.00000  -0.00039  -0.00039   1.93826
   A12        1.91275   0.00000   0.00000  -0.00002  -0.00002   1.91273
   A13        1.93752   0.00002   0.00000   0.00073   0.00073   1.93825
   A14        1.88993  -0.00001   0.00000  -0.00006  -0.00006   1.88987
   A15        1.89376  -0.00002   0.00000  -0.00022  -0.00022   1.89354
   A16        1.88991   0.00000   0.00000  -0.00004  -0.00004   1.88988
    D1       -3.13737   0.00000   0.00000  -0.00421  -0.00421  -3.14158
    D2        0.00421   0.00000   0.00000  -0.00419  -0.00419   0.00002
    D3       -1.07857   0.00009   0.00000   0.05868   0.05868  -1.01989
    D4        0.96213   0.00009   0.00000   0.05852   0.05852   1.02065
    D5        3.08377   0.00021   0.00000   0.05819   0.05819  -3.14122
    D6        1.05082  -0.00003   0.00000   0.00355   0.00355   1.05437
    D7        3.13839  -0.00004   0.00000   0.00321   0.00321  -3.14158
    D8       -1.05795  -0.00003   0.00000   0.00360   0.00360  -1.05434
    D9       -1.02928   0.00001   0.00000   0.00210   0.00210  -1.02717
   D10        1.05830   0.00001   0.00000   0.00177   0.00177   1.06006
   D11       -3.13804   0.00001   0.00000   0.00216   0.00216  -3.13588
   D12        3.13329   0.00002   0.00000   0.00259   0.00259   3.13589
   D13       -1.06232   0.00002   0.00000   0.00225   0.00225  -1.06006
   D14        1.02453   0.00003   0.00000   0.00265   0.00265   1.02717
         Item               Value     Threshold  Converged?
 Maximum Force            0.000209     0.000015     NO 
 RMS     Force            0.000048     0.000010     NO 
 Maximum Displacement     0.112302     0.000060     NO 
 RMS     Displacement     0.026632     0.000040     NO 
 Predicted change in Energy=-1.144057D-05
 GradGradGradGradGradGradGradGradGradGradGradGradGradGradGradGradGradGrad

                          Input orientation:                          
 ---------------------------------------------------------------------
 Center     Atomic     Atomic              Coordinates (Angstroms)
 Number     Number      Type              X           Y           Z
 ---------------------------------------------------------------------
    1          6             0       -1.411857    0.450526    0.003891
    2          1             0       -1.948938    1.408077   -0.020089
    3          8             0       -1.938067   -0.628695    0.042585
    4          8             0       -0.094113    0.685227   -0.016920
    5          6             0        0.775346   -0.479561    0.010008
    6          1             0        0.557457   -1.053546    0.912087
    7          1             0        0.539814   -1.107452   -0.850783
    8          6             0        2.203990    0.013950   -0.019386
    9          1             0        2.418871    0.643839    0.844923
   10          1             0        2.886253   -0.838383   -0.000154
   11          1             0        2.401147    0.589728   -0.924689
 ---------------------------------------------------------------------
                    Distance matrix (angstroms):
                    1          2          3          4          5
     1  C    0.000000
     2  H    1.098150   0.000000
     3  O    1.201296   2.037765   0.000000
     4  O    1.338645   1.990703   2.264972   0.000000
     5  C    2.376754   3.314485   2.717703   1.453759   0.000000
     6  H    2.639176   3.634633   2.676597   2.076277   1.091184
     7  H    2.639466   3.634807   2.677164   2.076267   1.091184
     8  C    3.642183   4.380685   4.192072   2.394138   1.511768
     9  H    3.926727   4.517749   4.609338   2.656986   2.158770
    10  H    4.487211   5.331609   4.829064   3.347275   2.141211
    11  H    3.926913   4.517880   4.609658   2.656970   2.158765
                    6          7          8          9         10
     6  H    0.000000
     7  H    1.763782   0.000000
     8  C    2.172156   2.172152   0.000000
     9  H    2.520018   3.077872   1.090855   0.000000
    10  H    2.510333   2.510328   1.091936   1.769063   0.000000
    11  H    3.077871   2.520009   1.090855   1.770528   1.769066
                   11
    11  H    0.000000
 Stoichiometry    C3H6O2
 Framework group  C1[X(C3H6O2)]
 Deg. of freedom    27
 Full point group                 C1
 Largest Abelian subgroup         C1      NOp   1
 Largest concise Abelian subgroup C1      NOp   1
                         Standard orientation:                         
 ---------------------------------------------------------------------
 Center     Atomic     Atomic              Coordinates (Angstroms)
 Number     Number      Type              X           Y           Z
 ---------------------------------------------------------------------
    1          6             0        1.411858    0.450585   -0.000030
    2          1             0        1.948703    1.408568   -0.000070
    3          8             0        1.938393   -0.629171   -0.000118
    4          8             0        0.093978    0.685452    0.000119
    5          6             0       -0.775205   -0.479853    0.000206
    6          1             0       -0.548155   -1.081275   -0.881509
    7          1             0       -0.548482   -1.080882    0.882273
    8          6             0       -2.204056    0.013935   -0.000164
    9          1             0       -2.410092    0.616860   -0.885600
   10          1             0       -2.886120   -0.838774   -0.000098
   11          1             0       -2.410408    0.617255    0.884928
 ---------------------------------------------------------------------
 Rotational constants (GHZ):     18.0819582      2.8584057      2.5465123
 Standard basis: TZVP (5D, 7F)
 There are   131 symmetry adapted basis functions of A   symmetry.
 Integral buffers will be    131072 words long.
 Raffenetti 2 integral format.
 Two-electron integral symmetry is turned on.
   131 basis functions,   223 primitive gaussians,   136 cartesian basis functions
    20 alpha electrons       20 beta electrons
       nuclear repulsion energy       177.2241399649 Hartrees.
 NAtoms=   11 NActive=   11 NUniq=   11 SFac= 7.50D-01 NAtFMM=   80 NAOKFM=F Big=F
 One-electron integrals computed using PRISM.
 NBasis=   131 RedAO= T  NBF=   131
 NBsUse=   131 1.00D-06 NBFU=   131
 Initial guess read from the read-write file:
 Initial guess orbital symmetries:
       Occupied  (A) (A) (A) (A) (A) (A) (A) (A) (A) (A) (A) (A)
                 (A) (A) (A) (A) (A) (A) (A) (A)
       Virtual   (A) (A) (A) (A) (A) (A) (A) (A) (A) (A) (A) (A)
                 (A) (A) (A) (A) (A) (A) (A) (A) (A) (A) (A) (A)
                 (A) (A) (A) (A) (A) (A) (A) (A) (A) (A) (A) (A)
                 (A) (A) (A) (A) (A) (A) (A) (A) (A) (A) (A) (A)
                 (A) (A) (A) (A) (A) (A) (A) (A) (A) (A) (A) (A)
                 (A) (A) (A) (A) (A) (A) (A) (A) (A) (A) (A) (A)
                 (A) (A) (A) (A) (A) (A) (A) (A) (A) (A) (A) (A)
                 (A) (A) (A) (A) (A) (A) (A) (A) (A) (A) (A) (A)
                 (A) (A) (A) (A) (A) (A) (A) (A) (A) (A) (A) (A)
                 (A) (A) (A)
 Harris functional with IExCor=  402 diagonalized for initial guess.
 ExpMin= 9.52D-02 ExpMax= 2.70D+04 ExpMxC= 9.22D+02 IAcc=3 IRadAn=         5 AccDes= 0.00D+00
 HarFok:  IExCor= 402 AccDes= 0.00D+00 IRadAn=         5 IDoV=1
 ScaDFX=  1.000000  1.000000  1.000000  1.000000
 Requested convergence on RMS density matrix=1.00D-08 within 128 cycles.
 Requested convergence on MAX density matrix=1.00D-06.
 Requested convergence on             energy=1.00D-06.
 No special actions if energy rises.
 Keep R1 integrals in memory in canonical form, NReq=    45838121.
 Integral accuracy reduced to 1.0D-05 until final iterations.
 Initial convergence to 1.0D-05 achieved.  Increase integral accuracy.
 SCF Done:  E(RB+HF-LYP) =  -268.485743354     A.U. after   14 cycles
             Convg  =    0.4525D-08             -V/T =  2.0046
             S**2   =   0.0000
 Range of M.O.s used for correlation:     1   131
 NBasis=   131 NAE=    20 NBE=    20 NFC=     0 NFV=     0
 NROrb=    131 NOA=    20 NOB=    20 NVA=   111 NVB=   111

 **** Warning!!: The largest alpha MO coefficient is  0.16302514D+02

 Symmetrizing basis deriv contribution to polar:
 IMax=3 JMax=2 DiffMx= 0.00D+00
 G2DrvN: will do   12 centers at a time, making    1 passes doing MaxLOS=2.
 FoFDir/FoFCou used for L=0 through L=2.
 DoAtom=TTTTTTTTTTT
          Differentiating once with respect to electric field.
                with respect to dipole field.
          Differentiating once with respect to nuclear coordinates.
          Store integrals in memory, NReq=    44219734.
          There are  36 degrees of freedom in the 1st order CPHF.
    33 vectors were produced by pass  0.
 AX will form  33 AO Fock derivatives at one time.
    33 vectors were produced by pass  1.
    33 vectors were produced by pass  2.
    33 vectors were produced by pass  3.
    33 vectors were produced by pass  4.
    21 vectors were produced by pass  5.
     5 vectors were produced by pass  6.
     1 vectors were produced by pass  7.
 Inv2:  IOpt= 1 Iter= 1 AM= 1.85D-15 Conv= 1.00D-12.
 Inverted reduced A of dimension  192 with in-core refinement.
 Isotropic polarizability for W=    0.000000       43.00 Bohr**3.
 End of Minotr Frequency-dependent properties file   721 does not exist.
 ***** Axes restored to original set *****
 -------------------------------------------------------------------
 Center     Atomic                   Forces (Hartrees/Bohr)
 Number     Number              X              Y              Z
 -------------------------------------------------------------------
    1          6          -0.000009097    0.000001591    0.000000676
    2          1           0.000000394   -0.000002268    0.000000158
    3          8          -0.000024393    0.000007812   -0.000001003
    4          8          -0.000013706   -0.000022014    0.000000278
    5          6           0.000034642    0.000000621    0.000002921
    6          1          -0.000001276    0.000011121   -0.000002184
    7          1          -0.000001924    0.000010415    0.000000511
    8          6           0.000011663   -0.000007521   -0.000000997
    9          1          -0.000000547    0.000000177    0.000000239
   10          1           0.000003622   -0.000000342   -0.000000351
   11          1           0.000000624    0.000000408   -0.000000247
 -------------------------------------------------------------------
 Cartesian Forces:  Max     0.000034642 RMS     0.000009661

 GradGradGradGradGradGradGradGradGradGradGradGradGradGradGradGradGradGrad
 Berny optimization.
 Internal  Forces:  Max     0.000087680 RMS     0.000017623
 Search for a local minimum.
 Step number   2 out of a maximum of  50
 All quantities printed in internal units (Hartrees-Bohrs-Radians)
 Second derivative matrix not updated -- analytic derivatives used.
 Trust test= 9.78D-01 RLast= 1.02D-01 DXMaxT set to 3.05D-01
     Eigenvalues ---    0.00211   0.00263   0.02286   0.04362   0.04492
     Eigenvalues ---    0.04683   0.06124   0.09495   0.12025   0.12530
     Eigenvalues ---    0.13424   0.13974   0.16567   0.17217   0.22407
     Eigenvalues ---    0.23862   0.26317   0.30261   0.32317   0.33188
     Eigenvalues ---    0.33300   0.33709   0.33719   0.34529   0.35351
     Eigenvalues ---    0.43621   0.886081000.000001000.000001000.00000
     Eigenvalues --- 1000.000001000.000001000.000001000.000001000.00000
     Eigenvalues --- 1000.000001000.000001000.000001000.000001000.00000
 RFO step:  Lambda=-4.07567416D-08.
 Quintic linear search produced a step of -0.00984.
 Iteration  1 RMS(Cart)=  0.00026447 RMS(Int)=  0.00000005
 Iteration  2 RMS(Cart)=  0.00000006 RMS(Int)=  0.00000000
 Variable       Old X    -DE/DX   Delta X   Delta X   Delta X     New X
                                 (Linear)    (Quad)   (Total)
    R1        2.07520   0.00000   0.00000   0.00000   0.00000   2.07520
    R2        2.27012   0.00000   0.00000  -0.00001   0.00000   2.27011
    R3        2.52967   0.00003   0.00000   0.00003   0.00002   2.52970
    R4        2.74721   0.00002   0.00000   0.00002   0.00002   2.74723
    R5        2.06204  -0.00001   0.00000  -0.00002  -0.00002   2.06202
    R6        2.06204  -0.00001   0.00000  -0.00001  -0.00002   2.06202
    R7        2.85683   0.00001   0.00000   0.00002   0.00003   2.85685
    R8        2.06142   0.00000   0.00000   0.00000   0.00000   2.06142
    R9        2.06346   0.00000   0.00000   0.00000   0.00000   2.06346
   R10        2.06142   0.00000   0.00000   0.00000   0.00000   2.06142
    A1        2.17709  -0.00002   0.00000  -0.00005  -0.00005   2.17705
    A2        1.90522  -0.00002   0.00000  -0.00008  -0.00008   1.90513
    A3        2.20087   0.00004   0.00000   0.00013   0.00013   2.20101
    A4        2.03529   0.00009   0.00001   0.00031   0.00031   2.03561
    A5        1.89373  -0.00001  -0.00001  -0.00007  -0.00008   1.89365
    A6        1.89371  -0.00001   0.00001  -0.00007  -0.00007   1.89365
    A7        1.87892   0.00003   0.00000   0.00008   0.00008   1.87901
    A8        1.88217   0.00001   0.00000   0.00007   0.00008   1.88224
    A9        1.95680   0.00000   0.00000  -0.00002  -0.00001   1.95679
   A10        1.95680   0.00000   0.00000  -0.00001  -0.00001   1.95679
   A11        1.93826   0.00000   0.00000  -0.00001  -0.00001   1.93825
   A12        1.91273   0.00000   0.00000   0.00000   0.00000   1.91273
   A13        1.93825   0.00000  -0.00001   0.00001   0.00000   1.93825
   A14        1.88987   0.00000   0.00000   0.00000   0.00000   1.88988
   A15        1.89354   0.00000   0.00000   0.00000   0.00000   1.89354
   A16        1.88988   0.00000   0.00000   0.00000   0.00000   1.88988
    D1       -3.14158   0.00000   0.00004  -0.00005  -0.00001   3.14159
    D2        0.00002   0.00000   0.00004  -0.00006  -0.00002   0.00000
    D3       -1.01989   0.00000  -0.00058   0.00020  -0.00038  -1.02027
    D4        1.02065   0.00000  -0.00058   0.00021  -0.00037   1.02028
    D5       -3.14122   0.00000  -0.00057   0.00021  -0.00037  -3.14159
    D6        1.05437   0.00000  -0.00003   0.00002  -0.00001   1.05435
    D7       -3.14158   0.00000  -0.00003   0.00002  -0.00001  -3.14159
    D8       -1.05434   0.00000  -0.00004   0.00003  -0.00001  -1.05435
    D9       -1.02717   0.00000  -0.00002   0.00006   0.00004  -1.02713
   D10        1.06006   0.00000  -0.00002   0.00006   0.00004   1.06011
   D11       -3.13588   0.00000  -0.00002   0.00007   0.00004  -3.13584
   D12        3.13589   0.00000  -0.00003  -0.00002  -0.00005   3.13584
   D13       -1.06006   0.00000  -0.00002  -0.00002  -0.00004  -1.06011
   D14        1.02717   0.00000  -0.00003  -0.00001  -0.00004   1.02713
         Item               Value     Threshold  Converged?
 Maximum Force            0.000088     0.000015     NO 
 RMS     Force            0.000018     0.000010     NO 
 Maximum Displacement     0.000876     0.000060     NO 
 RMS     Displacement     0.000264     0.000040     NO 
 Predicted change in Energy=-2.109411D-08
 GradGradGradGradGradGradGradGradGradGradGradGradGradGradGradGradGradGrad

                          Input orientation:                          
 ---------------------------------------------------------------------
 Center     Atomic     Atomic              Coordinates (Angstroms)
 Number     Number      Type              X           Y           Z
 ---------------------------------------------------------------------
    1          6             0       -1.412005    0.450513    0.003829
    2          1             0       -1.948852    1.408196   -0.020035
    3          8             0       -1.938530   -0.628563    0.042174
    4          8             0       -0.094207    0.685018   -0.016688
    5          6             0        0.775441   -0.479644    0.010139
    6          1             0        0.557698   -1.053589    0.912269
    7          1             0        0.539852   -1.107522   -0.850633
    8          6             0        2.204060    0.013971   -0.019423
    9          1             0        2.418986    0.643890    0.844854
   10          1             0        2.886389   -0.838313   -0.000256
   11          1             0        2.401073    0.589753   -0.924756
 ---------------------------------------------------------------------
                    Distance matrix (angstroms):
                    1          2          3          4          5
     1  C    0.000000
     2  H    1.098149   0.000000
     3  O    1.201293   2.037736   0.000000
     4  O    1.338658   1.990654   2.265058   0.000000
     5  C    2.377005   3.314608   2.718243   1.453770   0.000000
     6  H    2.639567   3.634882   2.677474   2.076222   1.091175
     7  H    2.639569   3.634884   2.677478   2.076222   1.091175
     8  C    3.642394   4.380701   4.192576   2.394231   1.511781
     9  H    3.926984   4.517765   4.609922   2.657082   2.158777
    10  H    4.487458   5.331674   4.829663   3.347352   2.141227
    11  H    3.926986   4.517766   4.609924   2.657082   2.158777
                    6          7          8          9         10
     6  H    0.000000
     7  H    1.763817   0.000000
     8  C    2.172152   2.172152   0.000000
     9  H    2.519995   3.077867   1.090855   0.000000
    10  H    2.510349   2.510349   1.091939   1.769069   0.000000
    11  H    3.077867   2.519996   1.090856   1.770528   1.769069
                   11
    11  H    0.000000
 Stoichiometry    C3H6O2
 Framework group  C1[X(C3H6O2)]
 Deg. of freedom    27
 Full point group                 C1
 Largest Abelian subgroup         C1      NOp   1
 Largest concise Abelian subgroup C1      NOp   1
                         Standard orientation:                         
 ---------------------------------------------------------------------
 Center     Atomic     Atomic              Coordinates (Angstroms)
 Number     Number      Type              X           Y           Z
 ---------------------------------------------------------------------
    1          6             0        1.411915    0.450577    0.000000
    2          1             0        1.948541    1.408682   -0.000001
    3          8             0        1.938749   -0.629031   -0.000001
    4          8             0        0.093989    0.685257    0.000001
    5          6             0       -0.775400   -0.479908    0.000002
    6          1             0       -0.548565   -1.081113   -0.881906
    7          1             0       -0.548568   -1.081110    0.881911
    8          6             0       -2.204221    0.014009   -0.000001
    9          1             0       -2.410357    0.617150   -0.885267
   10          1             0       -2.886363   -0.838640   -0.000001
   11          1             0       -2.410359    0.617153    0.885261
 ---------------------------------------------------------------------
 Rotational constants (GHZ):     18.0858137      2.8577821      2.5460954
 Standard basis: TZVP (5D, 7F)
 There are   131 symmetry adapted basis functions of A   symmetry.
 Integral buffers will be    131072 words long.
 Raffenetti 2 integral format.
 Two-electron integral symmetry is turned on.
   131 basis functions,   223 primitive gaussians,   136 cartesian basis functions
    20 alpha electrons       20 beta electrons
       nuclear repulsion energy       177.2177247231 Hartrees.
 NAtoms=   11 NActive=   11 NUniq=   11 SFac= 7.50D-01 NAtFMM=   80 NAOKFM=F Big=F
 One-electron integrals computed using PRISM.
 NBasis=   131 RedAO= T  NBF=   131
 NBsUse=   131 1.00D-06 NBFU=   131
 Initial guess read from the read-write file:
 Initial guess orbital symmetries:
       Occupied  (A) (A) (A) (A) (A) (A) (A) (A) (A) (A) (A) (A)
                 (A) (A) (A) (A) (A) (A) (A) (A)
       Virtual   (A) (A) (A) (A) (A) (A) (A) (A) (A) (A) (A) (A)
                 (A) (A) (A) (A) (A) (A) (A) (A) (A) (A) (A) (A)
                 (A) (A) (A) (A) (A) (A) (A) (A) (A) (A) (A) (A)
                 (A) (A) (A) (A) (A) (A) (A) (A) (A) (A) (A) (A)
                 (A) (A) (A) (A) (A) (A) (A) (A) (A) (A) (A) (A)
                 (A) (A) (A) (A) (A) (A) (A) (A) (A) (A) (A) (A)
                 (A) (A) (A) (A) (A) (A) (A) (A) (A) (A) (A) (A)
                 (A) (A) (A) (A) (A) (A) (A) (A) (A) (A) (A) (A)
                 (A) (A) (A) (A) (A) (A) (A) (A) (A) (A) (A) (A)
                 (A) (A) (A)
 Requested convergence on RMS density matrix=1.00D-08 within 128 cycles.
 Requested convergence on MAX density matrix=1.00D-06.
 Requested convergence on             energy=1.00D-06.
 No special actions if energy rises.
 Keep R1 integrals in memory in canonical form, NReq=    45838121.
 SCF Done:  E(RB+HF-LYP) =  -268.485743375     A.U. after    6 cycles
             Convg  =    0.7818D-08             -V/T =  2.0046
             S**2   =   0.0000
 Range of M.O.s used for correlation:     1   131
 NBasis=   131 NAE=    20 NBE=    20 NFC=     0 NFV=     0
 NROrb=    131 NOA=    20 NOB=    20 NVA=   111 NVB=   111

 **** Warning!!: The largest alpha MO coefficient is  0.16312988D+02

 Symmetrizing basis deriv contribution to polar:
 IMax=3 JMax=2 DiffMx= 0.00D+00
 G2DrvN: will do   12 centers at a time, making    1 passes doing MaxLOS=2.
 FoFDir/FoFCou used for L=0 through L=2.
 DoAtom=TTTTTTTTTTT
          Differentiating once with respect to electric field.
                with respect to dipole field.
          Differentiating once with respect to nuclear coordinates.
          Store integrals in memory, NReq=    44219734.
          There are  36 degrees of freedom in the 1st order CPHF.
    33 vectors were produced by pass  0.
 AX will form  33 AO Fock derivatives at one time.
    33 vectors were produced by pass  1.
    33 vectors were produced by pass  2.
    33 vectors were produced by pass  3.
    33 vectors were produced by pass  4.
    21 vectors were produced by pass  5.
     5 vectors were produced by pass  6.
     1 vectors were produced by pass  7.
 Inv2:  IOpt= 1 Iter= 1 AM= 2.72D-15 Conv= 1.00D-12.
 Inverted reduced A of dimension  192 with in-core refinement.
 Isotropic polarizability for W=    0.000000       43.01 Bohr**3.
 End of Minotr Frequency-dependent properties file   721 does not exist.
 ***** Axes restored to original set *****
 -------------------------------------------------------------------
 Center     Atomic                   Forces (Hartrees/Bohr)
 Number     Number              X              Y              Z
 -------------------------------------------------------------------
    1          6           0.000000154    0.000000053   -0.000000019
    2          1           0.000000006    0.000000136   -0.000000001
    3          8           0.000000157   -0.000000069    0.000000014
    4          8           0.000000202    0.000000236    0.000000004
    5          6          -0.000000351    0.000000021   -0.000000034
    6          1          -0.000000012   -0.000000112    0.000000023
    7          1          -0.000000014   -0.000000104   -0.000000001
    8          6          -0.000000106    0.000000031    0.000000010
    9          1           0.000000014   -0.000000069   -0.000000013
   10          1          -0.000000062   -0.000000059    0.000000003
   11          1           0.000000011   -0.000000065    0.000000012
 -------------------------------------------------------------------
 Cartesian Forces:  Max     0.000000351 RMS     0.000000103

 GradGradGradGradGradGradGradGradGradGradGradGradGradGradGradGradGradGrad
 Berny optimization.
 Internal  Forces:  Max     0.000000836 RMS     0.000000166
 Search for a local minimum.
 Step number   3 out of a maximum of  50
 All quantities printed in internal units (Hartrees-Bohrs-Radians)
 Second derivative matrix not updated -- analytic derivatives used.
 Trust test= 1.00D+00 RLast= 7.62D-04 DXMaxT set to 3.05D-01
     Eigenvalues ---    0.00211   0.00263   0.02285   0.04362   0.04492
     Eigenvalues ---    0.04683   0.06124   0.09495   0.12025   0.12530
     Eigenvalues ---    0.13423   0.13975   0.16567   0.17214   0.22396
     Eigenvalues ---    0.23858   0.26305   0.30257   0.32313   0.33190
     Eigenvalues ---    0.33298   0.33708   0.33719   0.34528   0.35350
     Eigenvalues ---    0.43601   0.886071000.000001000.000001000.00000
     Eigenvalues --- 1000.000001000.000001000.000001000.000001000.00000
     Eigenvalues --- 1000.000001000.000001000.000001000.000001000.00000
 RFO step:  Lambda= 0.00000000D+00.
 Quintic linear search produced a step of -0.00930.
 Iteration  1 RMS(Cart)=  0.00000212 RMS(Int)=  0.00000000
 Iteration  2 RMS(Cart)=  0.00000000 RMS(Int)=  0.00000000
 Variable       Old X    -DE/DX   Delta X   Delta X   Delta X     New X
                                 (Linear)    (Quad)   (Total)
    R1        2.07520   0.00000   0.00000   0.00000   0.00000   2.07520
    R2        2.27011   0.00000   0.00000   0.00000   0.00000   2.27012
    R3        2.52970   0.00000   0.00000   0.00000   0.00000   2.52970
    R4        2.74723   0.00000   0.00000   0.00000   0.00000   2.74723
    R5        2.06202   0.00000   0.00000   0.00000   0.00000   2.06202
    R6        2.06202   0.00000   0.00000   0.00000   0.00000   2.06202
    R7        2.85685   0.00000   0.00000   0.00000   0.00000   2.85685
    R8        2.06142   0.00000   0.00000   0.00000   0.00000   2.06142
    R9        2.06346   0.00000   0.00000   0.00000   0.00000   2.06346
   R10        2.06142   0.00000   0.00000   0.00000   0.00000   2.06142
    A1        2.17705   0.00000   0.00000   0.00000   0.00000   2.17705
    A2        1.90513   0.00000   0.00000   0.00000   0.00000   1.90513
    A3        2.20101   0.00000   0.00000   0.00000   0.00000   2.20101
    A4        2.03561   0.00000   0.00000   0.00000   0.00000   2.03561
    A5        1.89365   0.00000   0.00000   0.00000   0.00000   1.89365
    A6        1.89365   0.00000   0.00000   0.00000   0.00000   1.89365
    A7        1.87901   0.00000   0.00000   0.00000   0.00000   1.87901
    A8        1.88224   0.00000   0.00000   0.00000   0.00000   1.88224
    A9        1.95679   0.00000   0.00000   0.00000   0.00000   1.95679
   A10        1.95679   0.00000   0.00000   0.00000   0.00000   1.95679
   A11        1.93825   0.00000   0.00000   0.00000   0.00000   1.93825
   A12        1.91273   0.00000   0.00000   0.00000   0.00000   1.91273
   A13        1.93825   0.00000   0.00000   0.00000   0.00000   1.93825
   A14        1.88988   0.00000   0.00000   0.00000   0.00000   1.88988
   A15        1.89354   0.00000   0.00000   0.00000   0.00000   1.89354
   A16        1.88988   0.00000   0.00000   0.00000   0.00000   1.88988
    D1        3.14159   0.00000   0.00000   0.00000   0.00000   3.14159
    D2        0.00000   0.00000   0.00000   0.00000   0.00000   0.00000
    D3       -1.02027   0.00000   0.00000   0.00000   0.00000  -1.02027
    D4        1.02028   0.00000   0.00000   0.00000   0.00000   1.02028
    D5       -3.14159   0.00000   0.00000   0.00000   0.00000  -3.14159
    D6        1.05435   0.00000   0.00000   0.00000   0.00000   1.05435
    D7       -3.14159   0.00000   0.00000   0.00000   0.00000  -3.14159
    D8       -1.05435   0.00000   0.00000   0.00000   0.00000  -1.05435
    D9       -1.02713   0.00000   0.00000   0.00000   0.00000  -1.02713
   D10        1.06011   0.00000   0.00000   0.00000   0.00000   1.06011
   D11       -3.13584   0.00000   0.00000   0.00000   0.00000  -3.13584
   D12        3.13584   0.00000   0.00000   0.00000   0.00000   3.13584
   D13       -1.06011   0.00000   0.00000   0.00000   0.00000  -1.06011
   D14        1.02713   0.00000   0.00000   0.00000   0.00000   1.02713
         Item               Value     Threshold  Converged?
 Maximum Force            0.000001     0.000015     YES
 RMS     Force            0.000000     0.000010     YES
 Maximum Displacement     0.000008     0.000060     YES
 RMS     Displacement     0.000002     0.000040     YES
 Predicted change in Energy=-1.878310D-12
 Optimization completed.
    -- Stationary point found.
                           ----------------------------
                           !   Optimized Parameters   !
                           ! (Angstroms and Degrees)  !
 --------------------------                            --------------------------
 ! Name  Definition              Value          Derivative Info.                !
 --------------------------------------------------------------------------------
 ! R1    R(1,2)                  1.0981         -DE/DX =    0.0                 !
 ! R2    R(1,3)                  1.2013         -DE/DX =    0.0                 !
 ! R3    R(1,4)                  1.3387         -DE/DX =    0.0                 !
 ! R4    R(4,5)                  1.4538         -DE/DX =    0.0                 !
 ! R5    R(5,6)                  1.0912         -DE/DX =    0.0                 !
 ! R6    R(5,7)                  1.0912         -DE/DX =    0.0                 !
 ! R7    R(5,8)                  1.5118         -DE/DX =    0.0                 !
 ! R8    R(8,9)                  1.0909         -DE/DX =    0.0                 !
 ! R9    R(8,10)                 1.0919         -DE/DX =    0.0                 !
 ! R10   R(8,11)                 1.0909         -DE/DX =    0.0                 !
 ! A1    A(2,1,3)              124.7355         -DE/DX =    0.0                 !
 ! A2    A(2,1,4)              109.1561         -DE/DX =    0.0                 !
 ! A3    A(3,1,4)              126.1084         -DE/DX =    0.0                 !
 ! A4    A(1,4,5)              116.6318         -DE/DX =    0.0                 !
 ! A5    A(4,5,6)              108.498          -DE/DX =    0.0                 !
 ! A6    A(4,5,7)              108.498          -DE/DX =    0.0                 !
 ! A7    A(4,5,8)              107.6592         -DE/DX =    0.0                 !
 ! A8    A(6,5,7)              107.8446         -DE/DX =    0.0                 !
 ! A9    A(6,5,8)              112.1159         -DE/DX =    0.0                 !
 ! A10   A(7,5,8)              112.1159         -DE/DX =    0.0                 !
 ! A11   A(5,8,9)              111.0535         -DE/DX =    0.0                 !
 ! A12   A(5,8,10)             109.5914         -DE/DX =    0.0                 !
 ! A13   A(5,8,11)             111.0535         -DE/DX =    0.0                 !
 ! A14   A(9,8,10)             108.2819         -DE/DX =    0.0                 !
 ! A15   A(9,8,11)             108.4918         -DE/DX =    0.0                 !
 ! A16   A(10,8,11)            108.2819         -DE/DX =    0.0                 !
 ! D1    D(2,1,4,5)            180.0            -DE/DX =    0.0                 !
 ! D2    D(3,1,4,5)              0.0            -DE/DX =    0.0                 !
 ! D3    D(1,4,5,6)            -58.4572         -DE/DX =    0.0                 !
 ! D4    D(1,4,5,7)             58.4576         -DE/DX =    0.0                 !
 ! D5    D(1,4,5,8)           -179.9998         -DE/DX =    0.0                 !
 ! D6    D(4,5,8,9)             60.41           -DE/DX =    0.0                 !
 ! D7    D(4,5,8,10)          -180.0            -DE/DX =    0.0                 !
 ! D8    D(4,5,8,11)           -60.4099         -DE/DX =    0.0                 !
 ! D9    D(6,5,8,9)            -58.8504         -DE/DX =    0.0                 !
 ! D10   D(6,5,8,10)            60.7396         -DE/DX =    0.0                 !
 ! D11   D(6,5,8,11)          -179.6703         -DE/DX =    0.0                 !
 ! D12   D(7,5,8,9)            179.6704         -DE/DX =    0.0                 !
 ! D13   D(7,5,8,10)           -60.7396         -DE/DX =    0.0                 !
 ! D14   D(7,5,8,11)            58.8505         -DE/DX =    0.0                 !
 --------------------------------------------------------------------------------
 GradGradGradGradGradGradGradGradGradGradGradGradGradGradGradGradGradGrad

                          Input orientation:                          
 ---------------------------------------------------------------------
 Center     Atomic     Atomic              Coordinates (Angstroms)
 Number     Number      Type              X           Y           Z
 ---------------------------------------------------------------------
    1          6             0       -1.412005    0.450513    0.003829
    2          1             0       -1.948852    1.408196   -0.020035
    3          8             0       -1.938530   -0.628563    0.042174
    4          8             0       -0.094207    0.685018   -0.016688
    5          6             0        0.775441   -0.479644    0.010139
    6          1             0        0.557698   -1.053589    0.912269
    7          1             0        0.539852   -1.107522   -0.850633
    8          6             0        2.204060    0.013971   -0.019423
    9          1             0        2.418986    0.643890    0.844854
   10          1             0        2.886389   -0.838313   -0.000256
   11          1             0        2.401073    0.589753   -0.924756
 ---------------------------------------------------------------------
                    Distance matrix (angstroms):
                    1          2          3          4          5
     1  C    0.000000
     2  H    1.098149   0.000000
     3  O    1.201293   2.037736   0.000000
     4  O    1.338658   1.990654   2.265058   0.000000
     5  C    2.377005   3.314608   2.718243   1.453770   0.000000
     6  H    2.639567   3.634882   2.677474   2.076222   1.091175
     7  H    2.639569   3.634884   2.677478   2.076222   1.091175
     8  C    3.642394   4.380701   4.192576   2.394231   1.511781
     9  H    3.926984   4.517765   4.609922   2.657082   2.158777
    10  H    4.487458   5.331674   4.829663   3.347352   2.141227
    11  H    3.926986   4.517766   4.609924   2.657082   2.158777
                    6          7          8          9         10
     6  H    0.000000
     7  H    1.763817   0.000000
     8  C    2.172152   2.172152   0.000000
     9  H    2.519995   3.077867   1.090855   0.000000
    10  H    2.510349   2.510349   1.091939   1.769069   0.000000
    11  H    3.077867   2.519996   1.090856   1.770528   1.769069
                   11
    11  H    0.000000
 Stoichiometry    C3H6O2
 Framework group  C1[X(C3H6O2)]
 Deg. of freedom    27
 Full point group                 C1
 Largest Abelian subgroup         C1      NOp   1
 Largest concise Abelian subgroup C1      NOp   1
                         Standard orientation:                         
 ---------------------------------------------------------------------
 Center     Atomic     Atomic              Coordinates (Angstroms)
 Number     Number      Type              X           Y           Z
 ---------------------------------------------------------------------
    1          6             0        1.411915    0.450577    0.000000
    2          1             0        1.948541    1.408682   -0.000001
    3          8             0        1.938749   -0.629031   -0.000001
    4          8             0        0.093989    0.685257    0.000001
    5          6             0       -0.775400   -0.479908    0.000002
    6          1             0       -0.548565   -1.081113   -0.881906
    7          1             0       -0.548568   -1.081110    0.881911
    8          6             0       -2.204221    0.014009   -0.000001
    9          1             0       -2.410357    0.617150   -0.885267
   10          1             0       -2.886363   -0.838640   -0.000001
   11          1             0       -2.410359    0.617153    0.885261
 ---------------------------------------------------------------------
 Rotational constants (GHZ):     18.0858137      2.8577821      2.5460954

 **********************************************************************

            Population analysis using the SCF density.

 **********************************************************************

 Orbital symmetries:
       Occupied  (A) (A) (A) (A) (A) (A) (A) (A) (A) (A) (A) (A)
                 (A) (A) (A) (A) (A) (A) (A) (A)
       Virtual   (A) (A) (A) (A) (A) (A) (A) (A) (A) (A) (A) (A)
                 (A) (A) (A) (A) (A) (A) (A) (A) (A) (A) (A) (A)
                 (A) (A) (A) (A) (A) (A) (A) (A) (A) (A) (A) (A)
                 (A) (A) (A) (A) (A) (A) (A) (A) (A) (A) (A) (A)
                 (A) (A) (A) (A) (A) (A) (A) (A) (A) (A) (A) (A)
                 (A) (A) (A) (A) (A) (A) (A) (A) (A) (A) (A) (A)
                 (A) (A) (A) (A) (A) (A) (A) (A) (A) (A) (A) (A)
                 (A) (A) (A) (A) (A) (A) (A) (A) (A) (A) (A) (A)
                 (A) (A) (A) (A) (A) (A) (A) (A) (A) (A) (A) (A)
                 (A) (A) (A)
 The electronic state is 1-A.
 Alpha  occ. eigenvalues --  -19.18405 -19.12728 -10.30670 -10.24043 -10.17897
 Alpha  occ. eigenvalues --   -1.11784  -1.03473  -0.79040  -0.67358  -0.59417
 Alpha  occ. eigenvalues --   -0.53814  -0.50549  -0.48115  -0.43351  -0.41649
 Alpha  occ. eigenvalues --   -0.40822  -0.37573  -0.36663  -0.31907  -0.29464
 Alpha virt. eigenvalues --   -0.00982   0.03340   0.07271   0.07887   0.09192
 Alpha virt. eigenvalues --    0.09433   0.10365   0.12392   0.14691   0.16230
 Alpha virt. eigenvalues --    0.18611   0.20744   0.21564   0.22519   0.27426
 Alpha virt. eigenvalues --    0.29328   0.30707   0.32894   0.36563   0.40197
 Alpha virt. eigenvalues --    0.40767   0.41227   0.41873   0.43278   0.45390
 Alpha virt. eigenvalues --    0.46300   0.48401   0.50813   0.53263   0.53582
 Alpha virt. eigenvalues --    0.55875   0.59821   0.62020   0.67194   0.70732
 Alpha virt. eigenvalues --    0.80634   0.88436   1.14513   1.16281   1.23046
 Alpha virt. eigenvalues --    1.24865   1.26270   1.28014   1.29045   1.30818
 Alpha virt. eigenvalues --    1.31149   1.37883   1.39601   1.39831   1.40517
 Alpha virt. eigenvalues --    1.45688   1.52375   1.52853   1.56994   1.61765
 Alpha virt. eigenvalues --    1.63544   1.71901   1.71953   1.75537   1.77828
 Alpha virt. eigenvalues --    1.78521   1.84736   1.85632   1.90742   1.97978
 Alpha virt. eigenvalues --    2.01718   2.07888   2.13353   2.17186   2.22499
 Alpha virt. eigenvalues --    2.29206   2.29919   2.33741   2.40944   2.47567
 Alpha virt. eigenvalues --    2.48656   2.52399   2.56051   2.56844   2.61027
 Alpha virt. eigenvalues --    2.61314   2.62577   2.64991   2.66817   2.67315
 Alpha virt. eigenvalues --    2.69781   2.70323   2.73614   2.89691   2.92593
 Alpha virt. eigenvalues --    2.94322   2.95881   3.04358   3.06995   3.09906
 Alpha virt. eigenvalues --    3.17679   3.25555   3.25862   3.30510   3.31427
 Alpha virt. eigenvalues --    3.35954   3.36296   3.56189   3.85710   4.08574
 Alpha virt. eigenvalues --    4.23859  21.86849  22.01347  22.03171  43.39343
 Alpha virt. eigenvalues --   43.51342
          Condensed to atoms (all electrons):
              1          2          3          4          5          6
     1  C    4.599061   0.414572   0.549087   0.260466  -0.049946  -0.008632
     2  H    0.414572   0.644739  -0.058872  -0.098657   0.006149   0.000092
     3  O    0.549087  -0.058872   7.930810  -0.112136   0.000160   0.006608
     4  O    0.260466  -0.098657  -0.112136   8.107530   0.197081  -0.040773
     5  C   -0.049946   0.006149   0.000160   0.197081   4.955784   0.419627
     6  H   -0.008632   0.000092   0.006608  -0.040773   0.419627   0.580063
     7  H   -0.008632   0.000092   0.006608  -0.040773   0.419627  -0.044504
     8  C    0.016619   0.001640   0.006341  -0.073274   0.250531  -0.043962
     9  H   -0.000441  -0.000139  -0.000050   0.002736  -0.034523  -0.009175
    10  H   -0.000049   0.000044   0.000094   0.006132  -0.038115  -0.000174
    11  H   -0.000441  -0.000139  -0.000050   0.002736  -0.034523   0.008469
              7          8          9         10         11
     1  C   -0.008632   0.016619  -0.000441  -0.000049  -0.000441
     2  H    0.000092   0.001640  -0.000139   0.000044  -0.000139
     3  O    0.006608   0.006341  -0.000050   0.000094  -0.000050
     4  O   -0.040773  -0.073274   0.002736   0.006132   0.002736
     5  C    0.419627   0.250531  -0.034523  -0.038115  -0.034523
     6  H   -0.044504  -0.043962  -0.009175  -0.000174   0.008469
     7  H    0.580063  -0.043962   0.008469  -0.000174  -0.009174
     8  C   -0.043962   5.002410   0.402414   0.394883   0.402414
     9  H    0.008469   0.402414   0.562961  -0.026991  -0.028747
    10  H   -0.000174   0.394883  -0.026991   0.574282  -0.026991
    11  H   -0.009174   0.402414  -0.028747  -0.026991   0.562961
 Mulliken atomic charges:
              1
     1  C    0.228336
     2  H    0.090481
     3  O   -0.328599
     4  O   -0.211066
     5  C   -0.091850
     6  H    0.132361
     7  H    0.132361
     8  C   -0.316055
     9  H    0.123485
    10  H    0.117060
    11  H    0.123485
 Sum of Mulliken charges=   0.00000
 Atomic charges with hydrogens summed into heavy atoms:
              1
     1  C    0.318817
     2  H    0.000000
     3  O   -0.328599
     4  O   -0.211066
     5  C    0.172873
     6  H    0.000000
     7  H    0.000000
     8  C    0.047975
     9  H    0.000000
    10  H    0.000000
    11  H    0.000000
 Sum of Mulliken charges=   0.00000
 APT atomic charges:
              1
     1  C    1.122837
     2  H   -0.017437
     3  O   -0.702220
     4  O   -0.885126
     5  C    0.520378
     6  H   -0.035627
     7  H   -0.035627
     8  C    0.046122
     9  H   -0.003844
    10  H   -0.005611
    11  H   -0.003844
 Sum of APT charges=   0.00000
 APT Atomic charges with hydrogens summed into heavy atoms:
              1
     1  C    1.105400
     2  H    0.000000
     3  O   -0.702220
     4  O   -0.885126
     5  C    0.449124
     6  H    0.000000
     7  H    0.000000
     8  C    0.032823
     9  H    0.000000
    10  H    0.000000
    11  H    0.000000
 Sum of APT charges=   0.00000
 Electronic spatial extent (au):  <R**2>=   489.4103
 Charge=     0.0000 electrons
 Dipole moment (field-independent basis, Debye):
    X=    -2.0642    Y=     0.7808    Z=     0.0000  Tot=     2.2070
 Quadrupole moment (field-independent basis, Debye-Ang):
   XX=   -32.3826   YY=   -31.2140   ZZ=   -29.6123
   XY=     5.4231   XZ=     0.0000   YZ=     0.0000
 Traceless Quadrupole moment (field-independent basis, Debye-Ang):
   XX=    -1.3129   YY=    -0.1444   ZZ=     1.4573
   XY=     5.4231   XZ=     0.0000   YZ=     0.0000
 Octapole moment (field-independent basis, Debye-Ang**2):
  XXX=    -5.2744  YYY=     0.8200  ZZZ=     0.0000  XYY=     1.7948
  XXY=     9.4940  XXZ=     0.0000  XZZ=     2.1571  YZZ=    -0.0285
  YYZ=     0.0000  XYZ=     0.0000
 Hexadecapole moment (field-independent basis, Debye-Ang**3):
 XXXX=  -518.3395 YYYY=   -97.8371 ZZZZ=   -41.9224 XXXY=    19.3434
 XXXZ=     0.0000 YYYX=     4.0178 YYYZ=     0.0000 ZZZX=     0.0000
 ZZZY=     0.0000 XXYY=   -95.5565 XXZZ=   -88.8893 YYZZ=   -22.6117
 XXYZ=     0.0000 YYXZ=     0.0000 ZZXY=    -2.0045
 N-N= 1.772177247231D+02 E-N=-9.831237025169D+02  KE= 2.672601218367D+02
  Exact polarizability:  52.739  -0.165  42.722   0.000   0.000  33.554
 Approx polarizability:  63.205  -5.536  63.367   0.000   0.000  45.932
 Rotating derivatives to standard orientation.
 Full mass-weighted force constant matrix:
 Low frequencies ---   -6.3751   -3.4799   -2.7512   -0.0007    0.0001    0.0006
 Low frequencies ---   59.3988  224.4835  237.5522
 Diagonal vibrational polarizability:
       14.9208336       2.7294322      12.6919628
 Harmonic frequencies (cm**-1), IR intensities (KM/Mole), Raman scattering
 activities (A**4/AMU), depolarization ratios for plane and unpolarized
 incident light, reduced masses (AMU), force constants (mDyne/A),
 and normal coordinates:
                     1                      2                      3
                     A                      A                      A
 Frequencies --    59.3966               224.4835               237.5521
 Red. masses --     2.6514                 4.4951                 1.1217
 Frc consts  --     0.0055                 0.1335                 0.0373
 IR Inten    --     0.7934                 7.4074                 2.4128
 Atom AN      X      Y      Z        X      Y      Z        X      Y      Z
   1   6     0.00   0.00   0.03    -0.01   0.00   0.00     0.00   0.00   0.08
   2   1     0.00   0.00   0.05    -0.25   0.13   0.00     0.00   0.00   0.26
   3   8     0.00   0.00   0.16     0.29   0.15   0.00     0.00   0.00  -0.03
   4   8     0.00   0.00  -0.16    -0.05  -0.24   0.00     0.00   0.00  -0.01
   5   6     0.00   0.00  -0.21    -0.16  -0.15   0.00     0.00   0.00  -0.05
   6   1    -0.18   0.18  -0.39    -0.27  -0.17  -0.01    -0.02   0.02  -0.07
   7   1     0.18  -0.18  -0.39    -0.27  -0.17   0.01     0.02  -0.02  -0.07
   8   6     0.00   0.00   0.18    -0.06   0.21   0.00     0.00   0.00   0.01
   9   1    -0.18   0.21   0.37     0.13   0.27   0.00    -0.22  -0.43  -0.23
  10   1     0.00   0.00   0.12    -0.32   0.41   0.00     0.00   0.00   0.59
  11   1     0.18  -0.21   0.37     0.13   0.27   0.00     0.22   0.43  -0.23
                     4                      5                      6
                     A                      A                      A
 Frequencies --   346.7485               380.4662               786.6257
 Red. masses --     2.2020                 3.2371                 6.3665
 Frc consts  --     0.1560                 0.2761                 2.3211
 IR Inten    --    23.0801                 5.3983                 0.4788
 Atom AN      X      Y      Z        X      Y      Z        X      Y      Z
   1   6     0.00   0.00   0.19     0.12  -0.06   0.00     0.28   0.28   0.00
   2   1     0.00   0.00   0.75     0.11  -0.06   0.00     0.42   0.21   0.00
   3   8     0.00   0.00  -0.10     0.18  -0.03   0.00    -0.26   0.06   0.00
   4   8     0.00   0.00  -0.20     0.09   0.04   0.00     0.29  -0.08   0.00
   5   6     0.00   0.00   0.09    -0.13   0.18   0.00    -0.08  -0.26   0.00
   6   1    -0.04  -0.23   0.24    -0.16   0.16   0.01    -0.12  -0.24  -0.01
   7   1     0.04   0.23   0.24    -0.16   0.16  -0.01    -0.12  -0.24   0.01
   8   6     0.00   0.00   0.02    -0.26  -0.09   0.00    -0.21   0.00   0.00
   9   1     0.12   0.14   0.09    -0.50  -0.19  -0.01    -0.10   0.05   0.01
  10   1     0.00   0.00  -0.21     0.05  -0.35   0.00    -0.40   0.15   0.00
  11   1    -0.12  -0.14   0.09    -0.50  -0.19   0.01    -0.10   0.05  -0.01
                     7                      8                      9
                     A                      A                      A
 Frequencies --   816.8836               852.5686              1024.0080
 Red. masses --     1.0950                 2.8587                 2.5478
 Frc consts  --     0.4305                 1.2243                 1.5741
 IR Inten    --     0.5693                16.6575                22.4710
 Atom AN      X      Y      Z        X      Y      Z        X      Y      Z
   1   6     0.00   0.00   0.00     0.04  -0.05   0.00    -0.05  -0.02   0.00
   2   1     0.00   0.00  -0.03     0.19  -0.13   0.00    -0.16   0.03   0.00
   3   8     0.00   0.00   0.00     0.10  -0.06   0.00    -0.01   0.01   0.00
   4   8     0.00   0.00   0.02    -0.06   0.26   0.00    -0.01  -0.10   0.00
   5   6     0.00   0.00  -0.07    -0.05  -0.18   0.00     0.27   0.08   0.00
   6   1     0.34  -0.31   0.23     0.17  -0.05  -0.02     0.45   0.08   0.03
   7   1    -0.34   0.31   0.23     0.17  -0.05   0.02     0.45   0.08  -0.03
   8   6     0.00   0.00  -0.04    -0.09  -0.08   0.00    -0.21   0.00   0.00
   9   1    -0.39   0.19   0.19     0.31   0.12   0.04    -0.04   0.16   0.06
  10   1     0.00   0.00   0.18    -0.63   0.36   0.00    -0.53   0.27   0.00
  11   1     0.39  -0.19   0.19     0.31   0.12  -0.04    -0.04   0.16  -0.06
                    10                     11                     12
                     A                      A                      A
 Frequencies --  1038.2168              1134.8428              1180.4540
 Red. masses --     1.6574                 2.1239                 1.5440
 Frc consts  --     1.0526                 1.6116                 1.2676
 IR Inten    --     0.0320                10.8188                 4.4723
 Atom AN      X      Y      Z        X      Y      Z        X      Y      Z
   1   6     0.00   0.00   0.23     0.05   0.02   0.00     0.00   0.00   0.00
   2   1     0.00   0.00  -0.97    -0.06   0.08   0.00     0.00   0.00   0.07
   3   8     0.00   0.00  -0.06    -0.03   0.01   0.00     0.00   0.00   0.00
   4   8     0.00   0.00  -0.05     0.02  -0.08   0.00     0.00   0.00  -0.05
   5   6     0.00   0.00   0.00    -0.11   0.19   0.00     0.00   0.00   0.17
   6   1     0.01   0.02  -0.01    -0.13   0.17   0.01     0.09   0.50  -0.14
   7   1    -0.01  -0.02  -0.01    -0.13   0.17  -0.01    -0.09  -0.50  -0.14
   8   6     0.00   0.00   0.00     0.05  -0.19   0.00     0.00   0.00  -0.12
   9   1     0.00   0.00   0.00     0.52   0.09   0.08    -0.33   0.21   0.11
  10   1     0.00   0.00   0.00    -0.43   0.22   0.00     0.00   0.00   0.25
  11   1     0.00   0.00   0.00     0.52   0.09  -0.08     0.33  -0.21   0.11
                    13                     14                     15
                     A                      A                      A
 Frequencies --  1201.5328              1301.9114              1400.3299
 Red. masses --     8.5857                 1.0987                 1.2741
 Frc consts  --     7.3029                 1.0972                 1.4721
 IR Inten    --   415.4615                 1.1795                 3.1646
 Atom AN      X      Y      Z        X      Y      Z        X      Y      Z
   1   6     0.53   0.16   0.00     0.00   0.00   0.00    -0.04  -0.03   0.00
   2   1     0.51   0.15   0.00     0.00   0.00   0.04     0.13  -0.13   0.00
   3   8    -0.01  -0.12   0.00     0.00   0.00   0.00     0.00   0.03   0.00
   4   8    -0.49  -0.08   0.00     0.00   0.00  -0.03     0.01   0.03   0.00
   5   6     0.13   0.07   0.00     0.00   0.00  -0.02     0.12   0.01   0.00
   6   1    -0.18  -0.13   0.02     0.62   0.23   0.00    -0.55  -0.14  -0.06
   7   1    -0.18  -0.13  -0.02    -0.62  -0.23   0.00    -0.55  -0.14   0.06
   8   6     0.00   0.04   0.00     0.00   0.00   0.08     0.04  -0.05   0.00
   9   1    -0.08   0.03   0.01     0.19  -0.12  -0.05    -0.23   0.08   0.14
  10   1     0.10  -0.05   0.00     0.00   0.00  -0.11    -0.29   0.21   0.00
  11   1    -0.08   0.03  -0.01    -0.19   0.12  -0.05    -0.23   0.08  -0.14
                    16                     17                     18
                     A                      A                      A
 Frequencies --  1408.7450              1432.3360              1489.7762
 Red. masses --     1.1430                 1.3249                 1.0379
 Frc consts  --     1.3364                 1.6015                 1.3572
 IR Inten    --     1.6807                14.2199                 6.9834
 Atom AN      X      Y      Z        X      Y      Z        X      Y      Z
   1   6    -0.05  -0.01   0.00     0.01   0.01   0.00     0.00   0.00   0.00
   2   1     0.81  -0.52   0.00     0.18  -0.08   0.00     0.00   0.00   0.00
   3   8     0.00   0.07   0.00     0.00   0.01   0.00     0.00   0.00   0.00
   4   8    -0.01  -0.04   0.00    -0.01  -0.03   0.00     0.00   0.00   0.00
   5   6     0.00   0.01   0.00    -0.09   0.01   0.00     0.00   0.00   0.02
   6   1     0.06   0.02   0.01     0.31   0.10   0.04    -0.03   0.03   0.00
   7   1     0.06   0.02  -0.01     0.31   0.10  -0.04     0.03  -0.03   0.00
   8   6    -0.03   0.01   0.00     0.14  -0.02   0.00     0.00   0.00   0.05
   9   1     0.13   0.01  -0.03    -0.46  -0.08   0.09    -0.43  -0.25  -0.05
  10   1     0.10  -0.10   0.00    -0.36   0.37   0.00     0.00   0.00  -0.70
  11   1     0.13   0.01   0.03    -0.46  -0.08  -0.09     0.43   0.25  -0.05
                    19                     20                     21
                     A                      A                      A
 Frequencies --  1501.6957              1520.7984              1791.6922
 Red. masses --     1.0490                 1.0817                 9.3601
 Frc consts  --     1.3938                 1.4740                17.7034
 IR Inten    --     3.0288                 8.3462               334.4230
 Atom AN      X      Y      Z        X      Y      Z        X      Y      Z
   1   6     0.00   0.00   0.00    -0.01  -0.01   0.00    -0.34   0.59   0.00
   2   1     0.02  -0.01   0.00    -0.01  -0.01   0.00     0.49   0.19   0.00
   3   8     0.00   0.00   0.00     0.00   0.01   0.00     0.20  -0.42   0.00
   4   8     0.00  -0.01   0.00     0.01   0.01   0.00     0.02  -0.04   0.00
   5   6     0.03  -0.02   0.00    -0.01   0.07   0.00     0.02   0.03   0.00
   6   1    -0.12   0.26  -0.21     0.03  -0.49   0.37    -0.13  -0.05   0.04
   7   1    -0.12   0.26   0.21     0.03  -0.49  -0.37    -0.13  -0.05  -0.04
   8   6     0.00   0.05   0.00     0.00   0.02   0.00     0.00  -0.01   0.00
   9   1     0.07  -0.45  -0.34     0.05  -0.26  -0.20     0.03  -0.01   0.00
  10   1    -0.21   0.19   0.00    -0.13   0.12   0.00    -0.05   0.03   0.00
  11   1     0.07  -0.45   0.34     0.05  -0.26   0.20     0.03  -0.01   0.00
                    22                     23                     24
                     A                      A                      A
 Frequencies --  3036.3783              3043.7374              3057.4035
 Red. masses --     1.0902                 1.0353                 1.0580
 Frc consts  --     5.9222                 5.6508                 5.8267
 IR Inten    --    62.0777                13.7934                11.0575
 Atom AN      X      Y      Z        X      Y      Z        X      Y      Z
   1   6    -0.04  -0.08   0.00     0.00   0.00   0.00     0.00   0.00   0.00
   2   1     0.50   0.86   0.00    -0.02  -0.04   0.00    -0.02  -0.04   0.00
   3   8     0.00   0.00   0.00     0.00   0.00   0.00     0.00   0.00   0.00
   4   8     0.00   0.00   0.00     0.00   0.00   0.00     0.00   0.00   0.00
   5   6     0.00   0.00   0.00     0.00   0.00   0.00     0.03  -0.06   0.00
   6   1    -0.01   0.02   0.03     0.00   0.00   0.00    -0.14   0.37   0.58
   7   1    -0.01   0.02  -0.03     0.00   0.00   0.00    -0.14   0.37  -0.58
   8   6     0.00   0.00   0.00    -0.05   0.01   0.00     0.00   0.01   0.00
   9   1     0.00  -0.02   0.02     0.09  -0.31   0.46     0.01  -0.03   0.05
  10   1     0.02   0.02   0.00     0.38   0.48   0.00    -0.06  -0.08   0.00
  11   1     0.00  -0.02  -0.02     0.09  -0.31  -0.46     0.01  -0.03  -0.05
                    25                     26                     27
                     A                      A                      A
 Frequencies --  3093.5172              3109.7637              3122.0599
 Red. masses --     1.1077                 1.1008                 1.1056
 Frc consts  --     6.2458                 6.2719                 6.3493
 IR Inten    --     2.9925                22.8282                36.7217
 Atom AN      X      Y      Z        X      Y      Z        X      Y      Z
   1   6     0.00   0.00   0.00     0.00   0.00   0.00     0.00   0.00   0.00
   2   1     0.00   0.00   0.00     0.00   0.00   0.00     0.00   0.00   0.00
   3   8     0.00   0.00   0.00     0.00   0.00   0.00     0.00   0.00   0.00
   4   8     0.00   0.00   0.00     0.00   0.00   0.00     0.00   0.00   0.00
   5   6     0.00   0.00   0.08     0.00   0.01   0.00     0.00   0.00   0.05
   6   1     0.13  -0.33  -0.49     0.02  -0.05  -0.08     0.08  -0.19  -0.28
   7   1    -0.13   0.33  -0.49     0.02  -0.05   0.08    -0.08   0.19  -0.28
   8   6     0.00   0.00  -0.05     0.03   0.09   0.00     0.00   0.00   0.08
   9   1     0.06  -0.20   0.28     0.09  -0.22   0.36    -0.11   0.34  -0.49
  10   1     0.00   0.00  -0.01    -0.49  -0.60   0.00     0.00   0.00   0.02
  11   1    -0.06   0.20   0.28     0.09  -0.22  -0.36     0.11  -0.34  -0.49

 -------------------
 - Thermochemistry -
 -------------------
 Temperature   298.150 Kelvin.  Pressure   1.00000 Atm.
 Atom  1 has atomic number  6 and mass  12.00000
 Atom  2 has atomic number  1 and mass   1.00783
 Atom  3 has atomic number  8 and mass  15.99491
 Atom  4 has atomic number  8 and mass  15.99491
 Atom  5 has atomic number  6 and mass  12.00000
 Atom  6 has atomic number  1 and mass   1.00783
 Atom  7 has atomic number  1 and mass   1.00783
 Atom  8 has atomic number  6 and mass  12.00000
 Atom  9 has atomic number  1 and mass   1.00783
 Atom 10 has atomic number  1 and mass   1.00783
 Atom 11 has atomic number  1 and mass   1.00783
 Molecular mass:    74.03678 amu.
 Principal axes and moments of inertia in atomic units:
                           1         2         3
     EIGENVALUES --    99.78767 631.51812 708.82703
           X            0.99974   0.02268   0.00000
           Y           -0.02268   0.99974   0.00000
           Z            0.00000   0.00000   1.00000
 This molecule is an asymmetric top.
 Rotational symmetry number  1.
 Rotational temperatures (Kelvin)      0.86798     0.13715     0.12219
 Rotational constants (GHZ):          18.08581     2.85778     2.54610
 Zero-point vibrational energy     236824.3 (Joules/Mol)
                                   56.60236 (Kcal/Mol)
 Warning -- explicit consideration of   5 degrees of freedom as
           vibrations may cause significant error
 Vibrational temperatures:     85.46   322.98   341.78   498.89   547.41
          (Kelvin)           1131.78  1175.31  1226.65  1473.32  1493.76
                             1632.78  1698.41  1728.74  1873.16  2014.76
                             2026.87  2060.81  2143.45  2160.60  2188.09
                             2577.84  4368.67  4379.25  4398.92  4450.88
                             4474.25  4491.94
 
 Zero-point correction=                           0.090202 (Hartree/Particle)
 Thermal correction to Energy=                    0.095961
 Thermal correction to Enthalpy=                  0.096906
 Thermal correction to Gibbs Free Energy=         0.061001
 Sum of electronic and zero-point Energies=           -268.395542
 Sum of electronic and thermal Energies=              -268.389782
 Sum of electronic and thermal Enthalpies=            -268.388838
 Sum of electronic and thermal Free Energies=         -268.424743
 
                     E (Thermal)             CV                S
                      KCal/Mol        Cal/Mol-Kelvin    Cal/Mol-Kelvin
 Total                   60.217             18.542             75.568
 Electronic               0.000              0.000              0.000
 Translational            0.889              2.981             38.822
 Rotational               0.889              2.981             25.305
 Vibrational             58.439             12.580             11.441
 Vibration  1             0.597              1.974              4.477
 Vibration  2             0.649              1.804              1.923
 Vibration  3             0.656              1.783              1.821
 Vibration  4             0.725              1.582              1.181
 Vibration  5             0.750              1.512              1.037
                       Q            Log10(Q)             Ln(Q)
 Total Bot       0.874488D-28        -28.058246        -64.606499
 Total V=0       0.270098D+14         13.431521         30.927220
 Vib (Bot)       0.461615D-40        -40.335720        -92.876428
 Vib (Bot)  1    0.347692D+01          0.541195          1.246147
 Vib (Bot)  2    0.879480D+00         -0.055774         -0.128424
 Vib (Bot)  3    0.826339D+00         -0.082842         -0.190750
 Vib (Bot)  4    0.533204D+00         -0.273107         -0.628851
 Vib (Bot)  5    0.475066D+00         -0.323246         -0.744301
 Vib (V=0)       0.142576D+02          1.154047          2.657291
 Vib (V=0)  1    0.401269D+01          0.603435          1.389462
 Vib (V=0)  2    0.151167D+01          0.179458          0.413218
 Vib (V=0)  3    0.146583D+01          0.166085          0.382425
 Vib (V=0)  4    0.123096D+01          0.090245          0.207797
 Vib (V=0)  5    0.118970D+01          0.075438          0.173702
 Electronic      0.100000D+01          0.000000          0.000000
 Translational   0.250395D+08          7.398626         17.035967
 Rotational      0.756568D+05          4.878848         11.233962
 ***** Axes restored to original set *****
 -------------------------------------------------------------------
 Center     Atomic                   Forces (Hartrees/Bohr)
 Number     Number              X              Y              Z
 -------------------------------------------------------------------
    1          6           0.000000154    0.000000053   -0.000000019
    2          1           0.000000006    0.000000136   -0.000000001
    3          8           0.000000157   -0.000000069    0.000000014
    4          8           0.000000202    0.000000236    0.000000004
    5          6          -0.000000351    0.000000021   -0.000000034
    6          1          -0.000000012   -0.000000112    0.000000023
    7          1          -0.000000014   -0.000000104   -0.000000001
    8          6          -0.000000106    0.000000031    0.000000010
    9          1           0.000000014   -0.000000069   -0.000000013
   10          1          -0.000000062   -0.000000059    0.000000003
   11          1           0.000000011   -0.000000065    0.000000012
 -------------------------------------------------------------------
 Cartesian Forces:  Max     0.000000351 RMS     0.000000103
 1\1\RECHENZENTRUM RWTH AACHEN-SRVMBFD\Freq\RB3LYP\TZVP\C3H6O2\JENS\27-
 Jan-2014\0\\# opt=(tight,calcall) freq B3LYP TZVP int=ultrafine maxdis
 k=300GB\\Title Card Required\\0,1\C,-1.4120047001,0.4505128531,0.00382
 92599\H,-1.9488517347,1.4081964039,-0.0200350367\O,-1.9385302811,-0.62
 85633535,0.0421744624\O,-0.0942071119,0.6850182122,-0.0166884374\C,0.7
 754409971,-0.4796442286,0.0101394352\H,0.5576975399,-1.0535893507,0.91
 22686887\H,0.5398524403,-1.1075223274,-0.8506332576\C,2.204059631,0.01
 39712406,-0.0194232772\H,2.4189860754,0.6438901716,0.8448535786\H,2.88
 63893061,-0.8383132081,-0.0002564044\H,2.401072838,0.5897525869,-0.924
 7560115\\Version=AM64L-G03RevE.01\State=1-A\HF=-268.4857434\RMSD=7.818
 e-09\RMSF=1.030e-07\ZeroPoint=0.0902016\Thermal=0.0959614\Dipole=0.812
 0097,0.3070227,-0.0176144\DipoleDeriv=1.9659375,0.1817478,-0.0227305,0
 .5696605,1.1312161,-0.032112,-0.0345991,-0.0281845,0.2713559,-0.027873
 6,0.084047,-0.0013507,0.0981681,-0.1169813,0.0054211,-0.0017826,0.0055
 641,0.0925448,-0.8752594,-0.1022538,0.0083293,-0.5591623,-0.8690769,0.
 0211879,0.0223084,0.0165617,-0.3623237,-1.7514747,0.0386515,0.0136826,
 0.1734482,-0.6202232,0.0085526,0.0095586,0.0099175,-0.2836809,0.772825
 3,-0.1887673,0.0013647,-0.362226,0.4511493,0.0001807,0.0066721,-0.0015
 755,0.3371596,-0.0338676,-0.0202359,0.0546168,0.0601898,-0.0110655,0.0
 47399,0.0217423,0.0806771,-0.0619482,-0.0354465,-0.0252068,-0.0536829,
 0.0577345,-0.0190914,-0.0511703,-0.0258066,-0.0827945,-0.0523441,-0.05
 15694,-0.0122151,0.0019297,-0.0169456,0.0878297,0.0006093,0.0020744,0.
 0005614,0.1021048,0.0369368,-0.0121399,-0.0008572,-0.0623406,0.008094,
 -0.0841077,-0.036523,-0.0927714,-0.0565623,-0.0379066,0.0666635,-0.000
 8286,0.0998563,-0.0605388,0.0033409,-0.0018441,0.0036769,0.0816119,0.0
 376982,-0.010291,-0.0004734,-0.0583828,0.0186881,0.0806986,0.0381995,0
 .0883673,-0.0679179\Polar=52.7370833,0.1611055,42.7136001,-0.1991511,-
 0.2818626,33.5646585\PG=C01 [X(C3H6O2)]\NImag=0\\0.63829636,0.09362983
 ,1.00165546,-0.00737163,-0.02568353,0.19402707,-0.11109147,0.10168083,
 -0.00260923,0.13474027,0.10912878,-0.22657408,0.00394400,-0.11176365,0
 .26135115,-0.00283710,0.00401941,-0.06164105,0.00230924,-0.00609638,0.
 02526337,-0.21185249,-0.23255436,0.00852180,0.01539164,0.00334327,-0.0
 0004942,0.24970665,-0.21931776,-0.65344139,0.01998197,-0.01913514,-0.0
 4127896,0.00208733,0.30685487,0.70779217,0.00811684,0.02011599,-0.0736
 0313,0.00063830,0.00185973,0.02055031,-0.01162121,-0.02386952,0.030008
 10,-0.27047565,-0.00679350,0.00231596,-0.03524697,0.00173590,0.0004006
 6,-0.06078210,-0.07270348,0.00313160,0.50173892,0.00076297,-0.12463135
 ,0.00190004,0.03217571,0.00409389,-0.00015829,-0.06838517,-0.01111449,
 0.00191428,-0.01686645,0.32948363,0.00208475,0.00197656,-0.06235763,-0
 .00053064,0.00014993,0.00956960,0.00299948,0.00195798,0.02873183,-0.00
 377087,-0.00751269,0.07861751,-0.05470126,0.02871399,-0.00030798,-0.00
 191301,-0.00216796,0.00015946,0.00966433,0.01061881,-0.00049381,-0.087
 60290,0.01307910,-0.00022569,0.47214730,0.02913884,0.01619735,-0.00074
 019,-0.00500362,0.00242147,0.00019946,-0.01162974,-0.01064605,0.000228
 69,0.03486022,-0.15104707,0.00211519,0.07925417,0.48834599,-0.00032100
 ,-0.00073593,0.00167327,0.00024622,0.00017074,0.00727708,0.00018687,0.
 00000345,-0.00702216,-0.00089209,0.00233575,-0.07043733,-0.00095954,0.
 00313036,0.61680706,0.00478446,0.00531385,-0.00152041,-0.00017414,-0.0
 0011591,0.00118261,-0.00089397,-0.00290689,-0.00012713,-0.00485875,0.0
 1897527,-0.01991106,-0.06085328,-0.03064368,0.04970458,0.06901713,-0.0
 0581321,-0.00237643,0.00058771,0.00027545,-0.00008912,-0.00063311,0.00
 141134,0.00237080,0.00001864,0.00939936,-0.02682148,0.02305332,-0.0278
 7842,-0.11302920,0.10421928,0.02453426,0.13124438,0.00299005,0.0023649
 4,0.00063106,-0.00019060,-0.00015616,-0.00045714,0.00032229,-0.0021399
 9,0.00036490,-0.00529600,0.00143707,0.00578560,0.04459892,0.10906940,-
 0.23846415,-0.04889252,-0.12089452,0.24880888,0.00475339,0.00534734,0.
 00111252,-0.00019444,-0.00018521,-0.00117920,-0.00089648,-0.00285034,0
 .00032754,-0.00436195,0.02015122,0.01893407,-0.06279391,-0.03600215,-0
 .05108810,0.00275004,0.00252166,0.00588137,0.07103454,-0.00599638,-0.0
 0254498,-0.00027267,0.00029892,-0.00004240,0.00060252,0.00138780,0.002
 49365,-0.00017726,0.00926469,-0.02821224,-0.02117579,-0.03283249,-0.12
 647052,-0.11040404,0.00241529,0.01133962,0.01246132,0.03009028,0.14640
 079,-0.00271044,-0.00227740,0.00083067,0.00016722,0.00013442,-0.000483
 58,-0.00038365,0.00206800,0.00024457,0.00494501,0.00023334,0.00667960,
 -0.04616404,-0.11519407,-0.22308209,-0.00652042,-0.01451178,-0.0213206
 6,0.05066894,0.12655165,0.23163497,0.00054467,0.00359050,-0.00011690,-
 0.00097959,-0.00001151,0.00001065,0.00011443,-0.00101750,0.00003972,-0
 .03597271,0.00279791,0.00029645,-0.18359479,-0.04674409,0.00240961,-0.
 00616136,-0.00341179,0.00007950,-0.00670161,-0.00355804,0.00031695,0.4
 9344837,-0.00144255,-0.00957515,0.00030295,0.00190761,0.00009587,-0.00
 002112,-0.00036414,0.00399231,-0.00008901,0.04424563,0.00520562,-0.000
 55307,-0.06039774,-0.09805484,0.00095492,-0.01646471,-0.00358558,-0.00
 166710,-0.01806350,-0.00392491,0.00240660,-0.02537309,0.57040310,0.000
 03710,0.00025199,-0.00015895,-0.00004807,-0.00000168,0.00003773,0.0000
 1974,-0.00008240,0.00096499,-0.00097159,-0.00013349,0.00178188,0.00282
 730,0.00081670,-0.08687971,0.02741904,0.00779953,0.00216546,-0.0261795
 0,-0.00733899,0.00304502,0.00161057,0.00042411,0.57584131,-0.00089177,
 -0.00091644,0.00011080,0.00004037,0.00002569,-0.00003563,-0.00004786,0
 .00088544,0.00013756,0.00352884,-0.00013498,0.00049345,-0.00809315,-0.
 02082086,-0.02886775,0.00142505,0.00064678,0.00035902,-0.00586801,-0.0
 0143950,0.00084908,-0.05647245,-0.02704919,-0.03700668,0.06169059,0.00
 029226,0.00008601,0.00002660,-0.00006428,0.00002306,-0.00007228,-0.000
 17682,-0.00003577,0.00012340,0.00027685,0.00117947,0.00092983,-0.00141
 323,-0.00821015,-0.00945034,0.00029143,-0.00008145,0.00006785,-0.00204
 649,0.00061925,0.00073154,-0.02958129,-0.13482354,-0.12002922,0.034111
 73,0.14379625,-0.00022917,0.00006084,0.00005831,-0.00005418,0.00000287
 ,-0.00001476,0.00019676,0.00020078,-0.00006054,-0.00021724,0.00045971,
 0.00024654,-0.00007580,0.00114026,0.00173416,-0.00058923,0.00025200,0.
 00092975,0.00086011,-0.00002606,0.00150464,-0.03909766,-0.12081892,-0.
 21730567,0.04257447,0.13328384,0.23185542,0.00152236,0.00290993,-0.000
 09960,-0.00061484,-0.00001710,0.00000593,-0.00034908,-0.00129913,0.000
 04181,-0.00948858,-0.00237887,0.00017940,-0.01476909,0.02661562,-0.000
 68697,0.00086221,-0.00020269,0.00075737,0.00084952,-0.00024929,-0.0007
 6099,-0.14925757,0.12544985,-0.00279445,0.00439723,-0.00560256,0.00124
 590,0.16283289,-0.00068849,0.00112361,-0.00001276,-0.00031240,-0.00002
 805,0.00000155,0.00030393,-0.00007622,-0.00000520,-0.00368740,0.000772
 90,0.00004561,-0.00577323,0.00814639,-0.00025795,0.00070554,0.00044671
 ,0.00008918,0.00071140,0.00043952,-0.00013100,0.12817206,-0.20932699,0
 .00369373,0.01082010,-0.01387298,0.00143915,-0.13996193,0.22508636,0.0
 0001050,-0.00004918,0.00048019,0.00001496,-0.00000144,-0.00008087,-0.0
 0000724,0.00001103,-0.00014583,0.00021942,0.00003237,0.00104051,0.0003
 0390,-0.00058581,-0.00218060,-0.00016263,-0.00000425,-0.00001523,0.000
 10183,-0.00001865,0.00000466,-0.00287773,0.00372129,-0.04626367,0.0174
 2571,-0.01959526,0.00126841,0.00309220,-0.00408310,0.04540345,-0.00088
 860,-0.00092197,-0.00003532,0.00004218,0.00002770,0.00003280,-0.000055
 07,0.00087113,-0.00019122,0.00352184,-0.00017671,-0.00054936,-0.007490
 23,-0.01902472,0.03026818,-0.00589739,-0.00148273,-0.00060939,0.001428
 92,0.00061873,-0.00040766,-0.05496739,-0.02244816,0.03508653,0.0002911
 7,0.00391239,-0.00461396,0.00401495,0.00971041,-0.01812093,0.05999961,
 0.00030569,0.00008095,-0.00003413,-0.00005943,0.00002718,0.00007091,-0
 .00019098,-0.00005606,-0.00011975,0.00026820,0.00109114,-0.00098688,-0
 .00120300,-0.00765337,0.01003375,-0.00210445,0.00058174,-0.00063198,0.
 00032580,-0.00009778,-0.00001130,-0.02486317,-0.12040587,0.11459972,0.
 00387123,0.01131984,-0.01599448,-0.00526382,-0.01271125,0.02057301,0.0
 2891394,0.12782349,0.00023010,-0.00004370,0.00006019,0.00005677,-0.000
 00603,-0.00002069,-0.00018542,-0.00021863,-0.00003304,0.00013513,-0.00
 050809,0.00034188,0.00033728,-0.00017999,0.00057447,-0.00058283,0.0001
 1317,0.00157153,0.00056042,-0.00020202,0.00094219,0.03732885,0.1153393
 4,-0.23322839,0.00395996,0.01398404,-0.02021626,-0.00098059,-0.0007792
 2,0.00048897,-0.04085967,-0.12749887,0.24951914\\-0.00000015,-0.000000
 05,0.00000002,0.,-0.00000014,0.,-0.00000016,0.00000007,-0.00000001,-0.
 00000020,-0.00000024,0.,0.00000035,-0.00000002,0.00000003,0.00000001,0
 .00000011,-0.00000002,0.00000001,0.00000010,0.,0.00000011,-0.00000003,
 -0.00000001,-0.00000001,0.00000007,0.00000001,0.00000006,0.00000006,0.
 ,-0.00000001,0.00000007,-0.00000001\\\@


 WE SHOULD BE CAREFUL TO GET OUT OF AN EXPERIENCE ONLY THE WISDOM
 THAT IS IN IT -- AND STOP THERE;
 LEST WE BE LIKE THE CAT THAT SITS DOWN ON A HOT STOVE-LID.
 SHE WILL NEVER SIT DOWN ON A HOT STOVE LID AGAIN;
 BUT ALSO SHE WILL NEVER SIT DOWN ON A COLD ONE ANY MORE.

                                                     -- MARK TWAIN
 Job cpu time:  0 days  0 hours 48 minutes  8.2 seconds.
 File lengths (MBytes):  RWF=     29 Int=      0 D2E=      0 Chk=      7 Scr=      1
 Normal termination of Gaussian 03 at Mon Jan 27 12:27:31 2014.
 Link1:  Proceeding to internal job step number  2.
 --------------------------------------------------------------
 #N Geom=AllCheck Guess=Read SCRF=Check GenChk RB3LYP/TZVP Freq
 --------------------------------------------------------------
 1/7=10,10=4,29=7,30=1,38=1,40=1,46=1/1,3;
 2/40=1/2;
 3/5=19,7=101,11=2,16=1,25=1,30=1,70=2,71=2,74=-5,75=5/1,2,3;
 4/5=1,7=1/1;
 5/5=2,38=6/2;
 8/6=4,10=90,11=11/1;
 11/6=1,8=1,9=11,15=111,16=1/1,2,10;
 10/6=1/2;
 6/7=2,8=2,9=2,10=2,18=1,28=1/1;
 7/8=1,10=1,25=1/1,2,3,16;
 1/10=4,30=1,46=1/3;
 99//99;
 -------------------
 Title Card Required
 -------------------
 Redundant internal coordinates taken from checkpoint file:
 EtF_opt_freq_new_conformer.chk
 Charge =  0 Multiplicity = 1
 C,0,-1.4120047001,0.4505128531,0.0038292599
 H,0,-1.9488517347,1.4081964039,-0.0200350367
 O,0,-1.9385302811,-0.6285633535,0.0421744624
 O,0,-0.0942071119,0.6850182122,-0.0166884374
 C,0,0.7754409971,-0.4796442286,0.0101394352
 H,0,0.5576975399,-1.0535893507,0.9122686887
 H,0,0.5398524403,-1.1075223274,-0.8506332576
 C,0,2.204059631,0.0139712406,-0.0194232772
 H,0,2.4189860754,0.6438901716,0.8448535786
 H,0,2.8863893061,-0.8383132081,-0.0002564044
 H,0,2.401072838,0.5897525869,-0.9247560115
 Recover connectivity data from disk.

 GradGradGradGradGradGradGradGradGradGradGradGradGradGradGradGradGradGrad
 Berny optimization.
 Initialization pass.
                           ----------------------------
                           !    Initial Parameters    !
                           ! (Angstroms and Degrees)  !
 --------------------------                            --------------------------
 ! Name  Definition              Value          Derivative Info.                !
 --------------------------------------------------------------------------------
 ! R1    R(1,2)                  1.0981         calculate D2E/DX2 analytically  !
 ! R2    R(1,3)                  1.2013         calculate D2E/DX2 analytically  !
 ! R3    R(1,4)                  1.3387         calculate D2E/DX2 analytically  !
 ! R4    R(4,5)                  1.4538         calculate D2E/DX2 analytically  !
 ! R5    R(5,6)                  1.0912         calculate D2E/DX2 analytically  !
 ! R6    R(5,7)                  1.0912         calculate D2E/DX2 analytically  !
 ! R7    R(5,8)                  1.5118         calculate D2E/DX2 analytically  !
 ! R8    R(8,9)                  1.0909         calculate D2E/DX2 analytically  !
 ! R9    R(8,10)                 1.0919         calculate D2E/DX2 analytically  !
 ! R10   R(8,11)                 1.0909         calculate D2E/DX2 analytically  !
 ! A1    A(2,1,3)              124.7355         calculate D2E/DX2 analytically  !
 ! A2    A(2,1,4)              109.1561         calculate D2E/DX2 analytically  !
 ! A3    A(3,1,4)              126.1084         calculate D2E/DX2 analytically  !
 ! A4    A(1,4,5)              116.6318         calculate D2E/DX2 analytically  !
 ! A5    A(4,5,6)              108.498          calculate D2E/DX2 analytically  !
 ! A6    A(4,5,7)              108.498          calculate D2E/DX2 analytically  !
 ! A7    A(4,5,8)              107.6592         calculate D2E/DX2 analytically  !
 ! A8    A(6,5,7)              107.8446         calculate D2E/DX2 analytically  !
 ! A9    A(6,5,8)              112.1159         calculate D2E/DX2 analytically  !
 ! A10   A(7,5,8)              112.1159         calculate D2E/DX2 analytically  !
 ! A11   A(5,8,9)              111.0535         calculate D2E/DX2 analytically  !
 ! A12   A(5,8,10)             109.5914         calculate D2E/DX2 analytically  !
 ! A13   A(5,8,11)             111.0535         calculate D2E/DX2 analytically  !
 ! A14   A(9,8,10)             108.2819         calculate D2E/DX2 analytically  !
 ! A15   A(9,8,11)             108.4918         calculate D2E/DX2 analytically  !
 ! A16   A(10,8,11)            108.2819         calculate D2E/DX2 analytically  !
 ! D1    D(2,1,4,5)            180.0            calculate D2E/DX2 analytically  !
 ! D2    D(3,1,4,5)              0.0            calculate D2E/DX2 analytically  !
 ! D3    D(1,4,5,6)            -58.4572         calculate D2E/DX2 analytically  !
 ! D4    D(1,4,5,7)             58.4576         calculate D2E/DX2 analytically  !
 ! D5    D(1,4,5,8)           -179.9998         calculate D2E/DX2 analytically  !
 ! D6    D(4,5,8,9)             60.41           calculate D2E/DX2 analytically  !
 ! D7    D(4,5,8,10)          -180.0            calculate D2E/DX2 analytically  !
 ! D8    D(4,5,8,11)           -60.4099         calculate D2E/DX2 analytically  !
 ! D9    D(6,5,8,9)            -58.8504         calculate D2E/DX2 analytically  !
 ! D10   D(6,5,8,10)            60.7396         calculate D2E/DX2 analytically  !
 ! D11   D(6,5,8,11)          -179.6703         calculate D2E/DX2 analytically  !
 ! D12   D(7,5,8,9)            179.6704         calculate D2E/DX2 analytically  !
 ! D13   D(7,5,8,10)           -60.7396         calculate D2E/DX2 analytically  !
 ! D14   D(7,5,8,11)            58.8505         calculate D2E/DX2 analytically  !
 --------------------------------------------------------------------------------
 Trust Radius=3.00D-01 FncErr=1.00D-07 GrdErr=1.00D-07
 Number of steps in this run=   2 maximum allowed number of steps=   2.
 GradGradGradGradGradGradGradGradGradGradGradGradGradGradGradGradGradGrad

                          Input orientation:                          
 ---------------------------------------------------------------------
 Center     Atomic     Atomic              Coordinates (Angstroms)
 Number     Number      Type              X           Y           Z
 ---------------------------------------------------------------------
    1          6             0       -1.412005    0.450513    0.003829
    2          1             0       -1.948852    1.408196   -0.020035
    3          8             0       -1.938530   -0.628563    0.042174
    4          8             0       -0.094207    0.685018   -0.016688
    5          6             0        0.775441   -0.479644    0.010139
    6          1             0        0.557698   -1.053589    0.912269
    7          1             0        0.539852   -1.107522   -0.850633
    8          6             0        2.204060    0.013971   -0.019423
    9          1             0        2.418986    0.643890    0.844854
   10          1             0        2.886389   -0.838313   -0.000256
   11          1             0        2.401073    0.589753   -0.924756
 ---------------------------------------------------------------------
                    Distance matrix (angstroms):
                    1          2          3          4          5
     1  C    0.000000
     2  H    1.098149   0.000000
     3  O    1.201293   2.037736   0.000000
     4  O    1.338658   1.990654   2.265058   0.000000
     5  C    2.377005   3.314608   2.718243   1.453770   0.000000
     6  H    2.639567   3.634882   2.677474   2.076222   1.091175
     7  H    2.639569   3.634884   2.677478   2.076222   1.091175
     8  C    3.642394   4.380701   4.192576   2.394231   1.511781
     9  H    3.926984   4.517765   4.609922   2.657082   2.158777
    10  H    4.487458   5.331674   4.829663   3.347352   2.141227
    11  H    3.926986   4.517766   4.609924   2.657082   2.158777
                    6          7          8          9         10
     6  H    0.000000
     7  H    1.763817   0.000000
     8  C    2.172152   2.172152   0.000000
     9  H    2.519995   3.077867   1.090855   0.000000
    10  H    2.510349   2.510349   1.091939   1.769069   0.000000
    11  H    3.077867   2.519996   1.090856   1.770528   1.769069
                   11
    11  H    0.000000
 Stoichiometry    C3H6O2
 Framework group  C1[X(C3H6O2)]
 Deg. of freedom    27
 Full point group                 C1
 Largest Abelian subgroup         C1      NOp   1
 Largest concise Abelian subgroup C1      NOp   1
                         Standard orientation:                         
 ---------------------------------------------------------------------
 Center     Atomic     Atomic              Coordinates (Angstroms)
 Number     Number      Type              X           Y           Z
 ---------------------------------------------------------------------
    1          6             0        1.411915    0.450577    0.000000
    2          1             0        1.948541    1.408682   -0.000001
    3          8             0        1.938749   -0.629031   -0.000001
    4          8             0        0.093989    0.685257    0.000001
    5          6             0       -0.775400   -0.479908    0.000002
    6          1             0       -0.548565   -1.081113   -0.881906
    7          1             0       -0.548568   -1.081110    0.881911
    8          6             0       -2.204221    0.014009   -0.000001
    9          1             0       -2.410357    0.617150   -0.885267
   10          1             0       -2.886363   -0.838640   -0.000001
   11          1             0       -2.410359    0.617153    0.885261
 ---------------------------------------------------------------------
 Rotational constants (GHZ):     18.0858137      2.8577821      2.5460954
 Standard basis: TZVP (5D, 7F)
 There are   131 symmetry adapted basis functions of A   symmetry.
 Integral buffers will be    131072 words long.
 Raffenetti 2 integral format.
 Two-electron integral symmetry is turned on.
   131 basis functions,   223 primitive gaussians,   136 cartesian basis functions
    20 alpha electrons       20 beta electrons
       nuclear repulsion energy       177.2177247231 Hartrees.
 NAtoms=   11 NActive=   11 NUniq=   11 SFac= 7.50D-01 NAtFMM=   80 NAOKFM=F Big=F
 One-electron integrals computed using PRISM.
 NBasis=   131 RedAO= T  NBF=   131
 NBsUse=   131 1.00D-06 NBFU=   131
 Initial guess read from the checkpoint file:
 EtF_opt_freq_new_conformer.chk
 Initial guess orbital symmetries:
       Occupied  (A) (A) (A) (A) (A) (A) (A) (A) (A) (A) (A) (A)
                 (A) (A) (A) (A) (A) (A) (A) (A)
       Virtual   (A) (A) (A) (A) (A) (A) (A) (A) (A) (A) (A) (A)
                 (A) (A) (A) (A) (A) (A) (A) (A) (A) (A) (A) (A)
                 (A) (A) (A) (A) (A) (A) (A) (A) (A) (A) (A) (A)
                 (A) (A) (A) (A) (A) (A) (A) (A) (A) (A) (A) (A)
                 (A) (A) (A) (A) (A) (A) (A) (A) (A) (A) (A) (A)
                 (A) (A) (A) (A) (A) (A) (A) (A) (A) (A) (A) (A)
                 (A) (A) (A) (A) (A) (A) (A) (A) (A) (A) (A) (A)
                 (A) (A) (A) (A) (A) (A) (A) (A) (A) (A) (A) (A)
                 (A) (A) (A) (A) (A) (A) (A) (A) (A) (A) (A) (A)
                 (A) (A) (A)
 Requested convergence on RMS density matrix=1.00D-08 within 128 cycles.
 Requested convergence on MAX density matrix=1.00D-06.
 Requested convergence on             energy=1.00D-06.
 No special actions if energy rises.
 Keep R1 integrals in memory in canonical form, NReq=    45838121.
 SCF Done:  E(RB+HF-LYP) =  -268.485743375     A.U. after    1 cycles
             Convg  =    0.4726D-08             -V/T =  2.0046
             S**2   =   0.0000
 Range of M.O.s used for correlation:     1   131
 NBasis=   131 NAE=    20 NBE=    20 NFC=     0 NFV=     0
 NROrb=    131 NOA=    20 NOB=    20 NVA=   111 NVB=   111

 **** Warning!!: The largest alpha MO coefficient is  0.16312998D+02

 Symmetrizing basis deriv contribution to polar:
 IMax=3 JMax=2 DiffMx= 0.00D+00
 G2DrvN: will do   12 centers at a time, making    1 passes doing MaxLOS=2.
 FoFDir/FoFCou used for L=0 through L=2.
 DoAtom=TTTTTTTTTTT
          Differentiating once with respect to electric field.
                with respect to dipole field.
          Differentiating once with respect to nuclear coordinates.
          Store integrals in memory, NReq=    44219734.
          There are  36 degrees of freedom in the 1st order CPHF.
    33 vectors were produced by pass  0.
 AX will form  33 AO Fock derivatives at one time.
    33 vectors were produced by pass  1.
    33 vectors were produced by pass  2.
    33 vectors were produced by pass  3.
    33 vectors were produced by pass  4.
    21 vectors were produced by pass  5.
     5 vectors were produced by pass  6.
     1 vectors were produced by pass  7.
 Inv2:  IOpt= 1 Iter= 1 AM= 1.68D-15 Conv= 1.00D-12.
 Inverted reduced A of dimension  192 with in-core refinement.
 Isotropic polarizability for W=    0.000000       43.01 Bohr**3.
 End of Minotr Frequency-dependent properties file   721 does not exist.

 **********************************************************************

            Population analysis using the SCF density.

 **********************************************************************

 Orbital symmetries:
       Occupied  (A) (A) (A) (A) (A) (A) (A) (A) (A) (A) (A) (A)
                 (A) (A) (A) (A) (A) (A) (A) (A)
       Virtual   (A) (A) (A) (A) (A) (A) (A) (A) (A) (A) (A) (A)
                 (A) (A) (A) (A) (A) (A) (A) (A) (A) (A) (A) (A)
                 (A) (A) (A) (A) (A) (A) (A) (A) (A) (A) (A) (A)
                 (A) (A) (A) (A) (A) (A) (A) (A) (A) (A) (A) (A)
                 (A) (A) (A) (A) (A) (A) (A) (A) (A) (A) (A) (A)
                 (A) (A) (A) (A) (A) (A) (A) (A) (A) (A) (A) (A)
                 (A) (A) (A) (A) (A) (A) (A) (A) (A) (A) (A) (A)
                 (A) (A) (A) (A) (A) (A) (A) (A) (A) (A) (A) (A)
                 (A) (A) (A) (A) (A) (A) (A) (A) (A) (A) (A) (A)
                 (A) (A) (A)
 The electronic state is 1-A.
 Alpha  occ. eigenvalues --  -19.18405 -19.12728 -10.30670 -10.24043 -10.17897
 Alpha  occ. eigenvalues --   -1.11784  -1.03473  -0.79040  -0.67358  -0.59417
 Alpha  occ. eigenvalues --   -0.53814  -0.50549  -0.48115  -0.43351  -0.41649
 Alpha  occ. eigenvalues --   -0.40822  -0.37573  -0.36663  -0.31907  -0.29464
 Alpha virt. eigenvalues --   -0.00982   0.03340   0.07271   0.07887   0.09192
 Alpha virt. eigenvalues --    0.09433   0.10365   0.12392   0.14691   0.16230
 Alpha virt. eigenvalues --    0.18611   0.20744   0.21564   0.22519   0.27426
 Alpha virt. eigenvalues --    0.29328   0.30707   0.32894   0.36563   0.40197
 Alpha virt. eigenvalues --    0.40767   0.41227   0.41873   0.43278   0.45390
 Alpha virt. eigenvalues --    0.46300   0.48401   0.50813   0.53263   0.53582
 Alpha virt. eigenvalues --    0.55875   0.59821   0.62020   0.67194   0.70732
 Alpha virt. eigenvalues --    0.80634   0.88436   1.14513   1.16281   1.23046
 Alpha virt. eigenvalues --    1.24865   1.26270   1.28014   1.29045   1.30818
 Alpha virt. eigenvalues --    1.31149   1.37883   1.39601   1.39831   1.40517
 Alpha virt. eigenvalues --    1.45688   1.52375   1.52853   1.56994   1.61765
 Alpha virt. eigenvalues --    1.63544   1.71901   1.71953   1.75537   1.77828
 Alpha virt. eigenvalues --    1.78521   1.84736   1.85632   1.90742   1.97978
 Alpha virt. eigenvalues --    2.01718   2.07888   2.13353   2.17186   2.22499
 Alpha virt. eigenvalues --    2.29206   2.29919   2.33741   2.40944   2.47567
 Alpha virt. eigenvalues --    2.48656   2.52399   2.56051   2.56844   2.61027
 Alpha virt. eigenvalues --    2.61314   2.62577   2.64991   2.66817   2.67315
 Alpha virt. eigenvalues --    2.69781   2.70323   2.73614   2.89691   2.92593
 Alpha virt. eigenvalues --    2.94322   2.95881   3.04358   3.06995   3.09906
 Alpha virt. eigenvalues --    3.17679   3.25555   3.25862   3.30510   3.31427
 Alpha virt. eigenvalues --    3.35954   3.36296   3.56189   3.85710   4.08574
 Alpha virt. eigenvalues --    4.23859  21.86849  22.01347  22.03171  43.39343
 Alpha virt. eigenvalues --   43.51342
          Condensed to atoms (all electrons):
              1          2          3          4          5          6
     1  C    4.599059   0.414572   0.549086   0.260466  -0.049946  -0.008632
     2  H    0.414572   0.644739  -0.058872  -0.098657   0.006149   0.000092
     3  O    0.549086  -0.058872   7.930812  -0.112136   0.000160   0.006608
     4  O    0.260466  -0.098657  -0.112136   8.107530   0.197081  -0.040773
     5  C   -0.049946   0.006149   0.000160   0.197081   4.955784   0.419627
     6  H   -0.008632   0.000092   0.006608  -0.040773   0.419627   0.580063
     7  H   -0.008632   0.000092   0.006608  -0.040773   0.419627  -0.044504
     8  C    0.016619   0.001640   0.006341  -0.073274   0.250531  -0.043962
     9  H   -0.000441  -0.000139  -0.000050   0.002736  -0.034523  -0.009175
    10  H   -0.000049   0.000044   0.000094   0.006132  -0.038115  -0.000174
    11  H   -0.000441  -0.000139  -0.000050   0.002736  -0.034523   0.008469
              7          8          9         10         11
     1  C   -0.008632   0.016619  -0.000441  -0.000049  -0.000441
     2  H    0.000092   0.001640  -0.000139   0.000044  -0.000139
     3  O    0.006608   0.006341  -0.000050   0.000094  -0.000050
     4  O   -0.040773  -0.073274   0.002736   0.006132   0.002736
     5  C    0.419627   0.250531  -0.034523  -0.038115  -0.034523
     6  H   -0.044504  -0.043962  -0.009175  -0.000174   0.008469
     7  H    0.580063  -0.043962   0.008469  -0.000174  -0.009174
     8  C   -0.043962   5.002410   0.402414   0.394883   0.402414
     9  H    0.008469   0.402414   0.562961  -0.026991  -0.028747
    10  H   -0.000174   0.394883  -0.026991   0.574282  -0.026991
    11  H   -0.009174   0.402414  -0.028747  -0.026991   0.562961
 Mulliken atomic charges:
              1
     1  C    0.228338
     2  H    0.090481
     3  O   -0.328600
     4  O   -0.211066
     5  C   -0.091850
     6  H    0.132361
     7  H    0.132361
     8  C   -0.316056
     9  H    0.123485
    10  H    0.117060
    11  H    0.123485
 Sum of Mulliken charges=   0.00000
 Atomic charges with hydrogens summed into heavy atoms:
              1
     1  C    0.318819
     2  H    0.000000
     3  O   -0.328600
     4  O   -0.211066
     5  C    0.172872
     6  H    0.000000
     7  H    0.000000
     8  C    0.047974
     9  H    0.000000
    10  H    0.000000
    11  H    0.000000
 Sum of Mulliken charges=   0.00000
 APT atomic charges:
              1
     1  C    1.122839
     2  H   -0.017437
     3  O   -0.702221
     4  O   -0.885127
     5  C    0.520378
     6  H   -0.035627
     7  H   -0.035627
     8  C    0.046121
     9  H   -0.003844
    10  H   -0.005611
    11  H   -0.003844
 Sum of APT charges=   0.00000
 APT Atomic charges with hydrogens summed into heavy atoms:
              1
     1  C    1.105402
     2  H    0.000000
     3  O   -0.702221
     4  O   -0.885127
     5  C    0.449124
     6  H    0.000000
     7  H    0.000000
     8  C    0.032823
     9  H    0.000000
    10  H    0.000000
    11  H    0.000000
 Sum of APT charges=   0.00000
 Electronic spatial extent (au):  <R**2>=   489.4103
 Charge=     0.0000 electrons
 Dipole moment (field-independent basis, Debye):
    X=    -2.0642    Y=     0.7808    Z=     0.0000  Tot=     2.2070
 Quadrupole moment (field-independent basis, Debye-Ang):
   XX=   -32.3826   YY=   -31.2140   ZZ=   -29.6123
   XY=     5.4231   XZ=     0.0000   YZ=     0.0000
 Traceless Quadrupole moment (field-independent basis, Debye-Ang):
   XX=    -1.3129   YY=    -0.1444   ZZ=     1.4574
   XY=     5.4231   XZ=     0.0000   YZ=     0.0000
 Octapole moment (field-independent basis, Debye-Ang**2):
  XXX=    -5.2744  YYY=     0.8200  ZZZ=     0.0000  XYY=     1.7948
  XXY=     9.4941  XXZ=     0.0000  XZZ=     2.1571  YZZ=    -0.0285
  YYZ=     0.0000  XYZ=     0.0000
 Hexadecapole moment (field-independent basis, Debye-Ang**3):
 XXXX=  -518.3395 YYYY=   -97.8371 ZZZZ=   -41.9224 XXXY=    19.3435
 XXXZ=     0.0000 YYYX=     4.0178 YYYZ=     0.0000 ZZZX=     0.0000
 ZZZY=     0.0000 XXYY=   -95.5566 XXZZ=   -88.8893 YYZZ=   -22.6117
 XXYZ=     0.0000 YYXZ=     0.0000 ZZXY=    -2.0045
 N-N= 1.772177247231D+02 E-N=-9.831237047344D+02  KE= 2.672601236805D+02
  Exact polarizability:  52.739  -0.165  42.722   0.000   0.000  33.554
 Approx polarizability:  63.205  -5.536  63.367   0.000   0.000  45.932
 Full mass-weighted force constant matrix:
 Low frequencies ---   -6.3807   -3.4816   -2.7521   -0.0007    0.0006    0.0009
 Low frequencies ---   59.3992  224.4835  237.5526
 Diagonal vibrational polarizability:
       14.9208626       2.7294380      12.6919020
 Harmonic frequencies (cm**-1), IR intensities (KM/Mole), Raman scattering
 activities (A**4/AMU), depolarization ratios for plane and unpolarized
 incident light, reduced masses (AMU), force constants (mDyne/A),
 and normal coordinates:
                     1                      2                      3
                     A                      A                      A
 Frequencies --    59.3969               224.4835               237.5525
 Red. masses --     2.6514                 4.4951                 1.1217
 Frc consts  --     0.0055                 0.1335                 0.0373
 IR Inten    --     0.7934                 7.4074                 2.4128
 Atom AN      X      Y      Z        X      Y      Z        X      Y      Z
   1   6     0.00   0.00   0.03    -0.01   0.00   0.00     0.00   0.00   0.08
   2   1     0.00   0.00   0.05    -0.25   0.13   0.00     0.00   0.00   0.26
   3   8     0.00   0.00   0.16     0.29   0.15   0.00     0.00   0.00  -0.03
   4   8     0.00   0.00  -0.16    -0.05  -0.24   0.00     0.00   0.00  -0.01
   5   6     0.00   0.00  -0.21    -0.16  -0.15   0.00     0.00   0.00  -0.05
   6   1    -0.18   0.18  -0.39    -0.27  -0.17  -0.01    -0.02   0.02  -0.07
   7   1     0.18  -0.18  -0.39    -0.27  -0.17   0.01     0.02  -0.02  -0.07
   8   6     0.00   0.00   0.18    -0.06   0.21   0.00     0.00   0.00   0.01
   9   1    -0.18   0.21   0.37     0.13   0.27   0.00    -0.22  -0.43  -0.23
  10   1     0.00   0.00   0.12    -0.32   0.41   0.00     0.00   0.00   0.59
  11   1     0.18  -0.21   0.37     0.13   0.27   0.00     0.22   0.43  -0.23
                     4                      5                      6
                     A                      A                      A
 Frequencies --   346.7484               380.4662               786.6259
 Red. masses --     2.2020                 3.2371                 6.3665
 Frc consts  --     0.1560                 0.2761                 2.3211
 IR Inten    --    23.0801                 5.3983                 0.4788
 Atom AN      X      Y      Z        X      Y      Z        X      Y      Z
   1   6     0.00   0.00   0.19     0.12  -0.06   0.00     0.28   0.28   0.00
   2   1     0.00   0.00   0.75     0.11  -0.06   0.00     0.42   0.21   0.00
   3   8     0.00   0.00  -0.10     0.18  -0.03   0.00    -0.26   0.06   0.00
   4   8     0.00   0.00  -0.20     0.09   0.04   0.00     0.29  -0.08   0.00
   5   6     0.00   0.00   0.09    -0.13   0.18   0.00    -0.08  -0.26   0.00
   6   1    -0.04  -0.23   0.24    -0.16   0.16   0.01    -0.12  -0.24  -0.01
   7   1     0.04   0.23   0.24    -0.16   0.16  -0.01    -0.12  -0.24   0.01
   8   6     0.00   0.00   0.02    -0.26  -0.09   0.00    -0.21   0.00   0.00
   9   1     0.12   0.14   0.09    -0.50  -0.19  -0.01    -0.10   0.05   0.01
  10   1     0.00   0.00  -0.21     0.05  -0.35   0.00    -0.40   0.15   0.00
  11   1    -0.12  -0.14   0.09    -0.50  -0.19   0.01    -0.10   0.05  -0.01
                     7                      8                      9
                     A                      A                      A
 Frequencies --   816.8837               852.5686              1024.0081
 Red. masses --     1.0950                 2.8587                 2.5478
 Frc consts  --     0.4305                 1.2243                 1.5741
 IR Inten    --     0.5693                16.6575                22.4709
 Atom AN      X      Y      Z        X      Y      Z        X      Y      Z
   1   6     0.00   0.00   0.00     0.04  -0.05   0.00    -0.05  -0.02   0.00
   2   1     0.00   0.00  -0.03     0.19  -0.13   0.00    -0.16   0.03   0.00
   3   8     0.00   0.00   0.00     0.10  -0.06   0.00    -0.01   0.01   0.00
   4   8     0.00   0.00   0.02    -0.06   0.26   0.00    -0.01  -0.10   0.00
   5   6     0.00   0.00  -0.07    -0.05  -0.18   0.00     0.27   0.08   0.00
   6   1     0.34  -0.31   0.23     0.17  -0.05  -0.02     0.45   0.08   0.03
   7   1    -0.34   0.31   0.23     0.17  -0.05   0.02     0.45   0.08  -0.03
   8   6     0.00   0.00  -0.04    -0.09  -0.08   0.00    -0.21   0.00   0.00
   9   1    -0.39   0.19   0.19     0.31   0.12   0.04    -0.04   0.16   0.06
  10   1     0.00   0.00   0.18    -0.63   0.36   0.00    -0.53   0.27   0.00
  11   1     0.39  -0.19   0.19     0.31   0.12  -0.04    -0.04   0.16  -0.06
                    10                     11                     12
                     A                      A                      A
 Frequencies --  1038.2179              1134.8426              1180.4538
 Red. masses --     1.6574                 2.1239                 1.5440
 Frc consts  --     1.0526                 1.6116                 1.2676
 IR Inten    --     0.0320                10.8188                 4.4723
 Atom AN      X      Y      Z        X      Y      Z        X      Y      Z
   1   6     0.00   0.00   0.23     0.05   0.02   0.00     0.00   0.00   0.00
   2   1     0.00   0.00  -0.97    -0.06   0.08   0.00     0.00   0.00   0.07
   3   8     0.00   0.00  -0.06    -0.03   0.01   0.00     0.00   0.00   0.00
   4   8     0.00   0.00  -0.05     0.02  -0.08   0.00     0.00   0.00  -0.05
   5   6     0.00   0.00   0.00    -0.11   0.19   0.00     0.00   0.00   0.17
   6   1     0.01   0.02  -0.01    -0.13   0.17   0.01     0.09   0.50  -0.14
   7   1    -0.01  -0.02  -0.01    -0.13   0.17  -0.01    -0.09  -0.50  -0.14
   8   6     0.00   0.00   0.00     0.05  -0.19   0.00     0.00   0.00  -0.12
   9   1     0.00   0.00   0.00     0.52   0.09   0.08    -0.33   0.21   0.11
  10   1     0.00   0.00   0.00    -0.43   0.22   0.00     0.00   0.00   0.25
  11   1     0.00   0.00   0.00     0.52   0.09  -0.08     0.33  -0.21   0.11
                    13                     14                     15
                     A                      A                      A
 Frequencies --  1201.5328              1301.9113              1400.3299
 Red. masses --     8.5857                 1.0987                 1.2741
 Frc consts  --     7.3029                 1.0972                 1.4721
 IR Inten    --   415.4627                 1.1795                 3.1645
 Atom AN      X      Y      Z        X      Y      Z        X      Y      Z
   1   6     0.53   0.16   0.00     0.00   0.00   0.00    -0.04  -0.03   0.00
   2   1     0.51   0.15   0.00     0.00   0.00   0.04     0.13  -0.13   0.00
   3   8    -0.01  -0.12   0.00     0.00   0.00   0.00     0.00   0.03   0.00
   4   8    -0.49  -0.08   0.00     0.00   0.00  -0.03     0.01   0.03   0.00
   5   6     0.13   0.07   0.00     0.00   0.00  -0.02     0.12   0.01   0.00
   6   1    -0.18  -0.13   0.02     0.62   0.23   0.00    -0.55  -0.14  -0.06
   7   1    -0.18  -0.13  -0.02    -0.62  -0.23   0.00    -0.55  -0.14   0.06
   8   6     0.00   0.04   0.00     0.00   0.00   0.08     0.04  -0.05   0.00
   9   1    -0.08   0.03   0.01     0.19  -0.12  -0.05    -0.23   0.08   0.14
  10   1     0.10  -0.05   0.00     0.00   0.00  -0.11    -0.29   0.21   0.00
  11   1    -0.08   0.03  -0.01    -0.19   0.12  -0.05    -0.23   0.08  -0.14
                    16                     17                     18
                     A                      A                      A
 Frequencies --  1408.7459              1432.3359              1489.7758
 Red. masses --     1.1430                 1.3249                 1.0379
 Frc consts  --     1.3364                 1.6015                 1.3572
 IR Inten    --     1.6809                14.2199                 6.9834
 Atom AN      X      Y      Z        X      Y      Z        X      Y      Z
   1   6    -0.05  -0.01   0.00     0.01   0.01   0.00     0.00   0.00   0.00
   2   1     0.81  -0.52   0.00     0.18  -0.08   0.00     0.00   0.00   0.00
   3   8     0.00   0.07   0.00     0.00   0.01   0.00     0.00   0.00   0.00
   4   8    -0.01  -0.04   0.00    -0.01  -0.03   0.00     0.00   0.00   0.00
   5   6     0.00   0.01   0.00    -0.09   0.01   0.00     0.00   0.00   0.02
   6   1     0.06   0.02   0.01     0.31   0.10   0.04    -0.03   0.03   0.00
   7   1     0.06   0.02  -0.01     0.31   0.10  -0.04     0.03  -0.03   0.00
   8   6    -0.03   0.01   0.00     0.14  -0.02   0.00     0.00   0.00   0.05
   9   1     0.13   0.01  -0.03    -0.46  -0.08   0.09    -0.43  -0.25  -0.05
  10   1     0.10  -0.10   0.00    -0.36   0.37   0.00     0.00   0.00  -0.70
  11   1     0.13   0.01   0.03    -0.46  -0.08  -0.09     0.43   0.25  -0.05
                    19                     20                     21
                     A                      A                      A
 Frequencies --  1501.6954              1520.7983              1791.6925
 Red. masses --     1.0490                 1.0817                 9.3601
 Frc consts  --     1.3938                 1.4740                17.7034
 IR Inten    --     3.0288                 8.3462               334.4242
 Atom AN      X      Y      Z        X      Y      Z        X      Y      Z
   1   6     0.00   0.00   0.00    -0.01  -0.01   0.00    -0.34   0.59   0.00
   2   1     0.02  -0.01   0.00    -0.01  -0.01   0.00     0.49   0.19   0.00
   3   8     0.00   0.00   0.00     0.00   0.01   0.00     0.20  -0.42   0.00
   4   8     0.00  -0.01   0.00     0.01   0.01   0.00     0.02  -0.04   0.00
   5   6     0.03  -0.02   0.00    -0.01   0.07   0.00     0.02   0.03   0.00
   6   1    -0.12   0.26  -0.21     0.03  -0.49   0.37    -0.13  -0.05   0.04
   7   1    -0.12   0.26   0.21     0.03  -0.49  -0.37    -0.13  -0.05  -0.04
   8   6     0.00   0.05   0.00     0.00   0.02   0.00     0.00  -0.01   0.00
   9   1     0.07  -0.45  -0.34     0.05  -0.26  -0.20     0.03  -0.01   0.00
  10   1    -0.21   0.19   0.00    -0.13   0.12   0.00    -0.05   0.03   0.00
  11   1     0.07  -0.45   0.34     0.05  -0.26   0.20     0.03  -0.01   0.00
                    22                     23                     24
                     A                      A                      A
 Frequencies --  3036.3785              3043.7374              3057.4035
 Red. masses --     1.0902                 1.0353                 1.0580
 Frc consts  --     5.9222                 5.6508                 5.8267
 IR Inten    --    62.0782                13.7933                11.0575
 Atom AN      X      Y      Z        X      Y      Z        X      Y      Z
   1   6    -0.04  -0.08   0.00     0.00   0.00   0.00     0.00   0.00   0.00
   2   1     0.50   0.86   0.00    -0.02  -0.04   0.00    -0.02  -0.04   0.00
   3   8     0.00   0.00   0.00     0.00   0.00   0.00     0.00   0.00   0.00
   4   8     0.00   0.00   0.00     0.00   0.00   0.00     0.00   0.00   0.00
   5   6     0.00   0.00   0.00     0.00   0.00   0.00     0.03  -0.06   0.00
   6   1    -0.01   0.02   0.03     0.00   0.00   0.00    -0.14   0.37   0.58
   7   1    -0.01   0.02  -0.03     0.00   0.00   0.00    -0.14   0.37  -0.58
   8   6     0.00   0.00   0.00    -0.05   0.01   0.00     0.00   0.01   0.00
   9   1     0.00  -0.02   0.02     0.09  -0.31   0.46     0.01  -0.03   0.05
  10   1     0.02   0.02   0.00     0.38   0.48   0.00    -0.06  -0.08   0.00
  11   1     0.00  -0.02  -0.02     0.09  -0.31  -0.46     0.01  -0.03  -0.05
                    25                     26                     27
                     A                      A                      A
 Frequencies --  3093.5172              3109.7637              3122.0599
 Red. masses --     1.1077                 1.1008                 1.1056
 Frc consts  --     6.2458                 6.2719                 6.3493
 IR Inten    --     2.9925                22.8280                36.7215
 Atom AN      X      Y      Z        X      Y      Z        X      Y      Z
   1   6     0.00   0.00   0.00     0.00   0.00   0.00     0.00   0.00   0.00
   2   1     0.00   0.00   0.00     0.00   0.00   0.00     0.00   0.00   0.00
   3   8     0.00   0.00   0.00     0.00   0.00   0.00     0.00   0.00   0.00
   4   8     0.00   0.00   0.00     0.00   0.00   0.00     0.00   0.00   0.00
   5   6     0.00   0.00   0.08     0.00   0.01   0.00     0.00   0.00   0.05
   6   1     0.13  -0.33  -0.49     0.02  -0.05  -0.08     0.08  -0.19  -0.28
   7   1    -0.13   0.33  -0.49     0.02  -0.05   0.08    -0.08   0.19  -0.28
   8   6     0.00   0.00  -0.05     0.03   0.09   0.00     0.00   0.00   0.08
   9   1     0.06  -0.20   0.28     0.09  -0.22   0.36    -0.11   0.34  -0.49
  10   1     0.00   0.00  -0.01    -0.49  -0.60   0.00     0.00   0.00   0.02
  11   1    -0.06   0.20   0.28     0.09  -0.22  -0.36     0.11  -0.34  -0.49

 -------------------
 - Thermochemistry -
 -------------------
 Temperature   298.150 Kelvin.  Pressure   1.00000 Atm.
 Atom  1 has atomic number  6 and mass  12.00000
 Atom  2 has atomic number  1 and mass   1.00783
 Atom  3 has atomic number  8 and mass  15.99491
 Atom  4 has atomic number  8 and mass  15.99491
 Atom  5 has atomic number  6 and mass  12.00000
 Atom  6 has atomic number  1 and mass   1.00783
 Atom  7 has atomic number  1 and mass   1.00783
 Atom  8 has atomic number  6 and mass  12.00000
 Atom  9 has atomic number  1 and mass   1.00783
 Atom 10 has atomic number  1 and mass   1.00783
 Atom 11 has atomic number  1 and mass   1.00783
 Molecular mass:    74.03678 amu.
 Principal axes and moments of inertia in atomic units:
                           1         2         3
     EIGENVALUES --    99.78767 631.51812 708.82703
           X            0.99974   0.02268   0.00000
           Y           -0.02268   0.99974   0.00000
           Z            0.00000   0.00000   1.00000
 This molecule is an asymmetric top.
 Rotational symmetry number  1.
 Rotational temperatures (Kelvin)      0.86798     0.13715     0.12219
 Rotational constants (GHZ):          18.08581     2.85778     2.54610
 Zero-point vibrational energy     236824.3 (Joules/Mol)
                                   56.60236 (Kcal/Mol)
 Warning -- explicit consideration of   5 degrees of freedom as
           vibrations may cause significant error
 Vibrational temperatures:     85.46   322.98   341.78   498.89   547.41
          (Kelvin)           1131.78  1175.31  1226.65  1473.32  1493.76
                             1632.78  1698.41  1728.74  1873.16  2014.76
                             2026.87  2060.81  2143.45  2160.60  2188.09
                             2577.84  4368.67  4379.25  4398.92  4450.88
                             4474.25  4491.94
 
 Zero-point correction=                           0.090202 (Hartree/Particle)
 Thermal correction to Energy=                    0.095961
 Thermal correction to Enthalpy=                  0.096906
 Thermal correction to Gibbs Free Energy=         0.061001
 Sum of electronic and zero-point Energies=           -268.395542
 Sum of electronic and thermal Energies=              -268.389782
 Sum of electronic and thermal Enthalpies=            -268.388838
 Sum of electronic and thermal Free Energies=         -268.424743
 
                     E (Thermal)             CV                S
                      KCal/Mol        Cal/Mol-Kelvin    Cal/Mol-Kelvin
 Total                   60.217             18.542             75.568
 Electronic               0.000              0.000              0.000
 Translational            0.889              2.981             38.822
 Rotational               0.889              2.981             25.305
 Vibrational             58.439             12.580             11.441
 Vibration  1             0.597              1.974              4.477
 Vibration  2             0.649              1.804              1.923
 Vibration  3             0.656              1.783              1.821
 Vibration  4             0.725              1.582              1.181
 Vibration  5             0.750              1.512              1.037
                       Q            Log10(Q)             Ln(Q)
 Total Bot       0.874479D-28        -28.058251        -64.606510
 Total V=0       0.270096D+14         13.431519         30.927214
 Vib (Bot)       0.461610D-40        -40.335725        -92.876439
 Vib (Bot)  1    0.347690D+01          0.541192          1.246142
 Vib (Bot)  2    0.879480D+00         -0.055774         -0.128424
 Vib (Bot)  3    0.826338D+00         -0.082843         -0.190752
 Vib (Bot)  4    0.533204D+00         -0.273106         -0.628851
 Vib (Bot)  5    0.475066D+00         -0.323246         -0.744301
 Vib (V=0)       0.142575D+02          1.154044          2.657285
 Vib (V=0)  1    0.401267D+01          0.603433          1.389457
 Vib (V=0)  2    0.151167D+01          0.179458          0.413218
 Vib (V=0)  3    0.146583D+01          0.166085          0.382424
 Vib (V=0)  4    0.123096D+01          0.090245          0.207797
 Vib (V=0)  5    0.118970D+01          0.075438          0.173702
 Electronic      0.100000D+01          0.000000          0.000000
 Translational   0.250395D+08          7.398626         17.035967
 Rotational      0.756568D+05          4.878848         11.233962
 ***** Axes restored to original set *****
 -------------------------------------------------------------------
 Center     Atomic                   Forces (Hartrees/Bohr)
 Number     Number              X              Y              Z
 -------------------------------------------------------------------
    1          6           0.000000212    0.000000177   -0.000000024
    2          1           0.000000069    0.000000013   -0.000000003
    3          8           0.000000218    0.000000029    0.000000004
    4          8          -0.000000004    0.000000154    0.000000019
    5          6          -0.000000366    0.000000011   -0.000000024
    6          1          -0.000000001   -0.000000116    0.000000022
    7          1          -0.000000005   -0.000000111   -0.000000002
    8          6          -0.000000105    0.000000029    0.000000000
    9          1           0.000000019   -0.000000054    0.000000004
   10          1          -0.000000050   -0.000000072    0.000000003
   11          1           0.000000014   -0.000000059    0.000000001
 -------------------------------------------------------------------
 Cartesian Forces:  Max     0.000000366 RMS     0.000000102

 GradGradGradGradGradGradGradGradGradGradGradGradGradGradGradGradGradGrad
 Berny optimization.
 Internal  Forces:  Max     0.000000734 RMS     0.000000167
 Search for a local minimum.
 Step number   1 out of a maximum of   2
 All quantities printed in internal units (Hartrees-Bohrs-Radians)
 Second derivative matrix not updated -- analytic derivatives used.
     Eigenvalues ---    0.00211   0.00263   0.02285   0.04362   0.04492
     Eigenvalues ---    0.04683   0.06124   0.09495   0.12025   0.12530
     Eigenvalues ---    0.13423   0.13975   0.16567   0.17214   0.22396
     Eigenvalues ---    0.23858   0.26305   0.30257   0.32313   0.33190
     Eigenvalues ---    0.33298   0.33708   0.33719   0.34528   0.35350
     Eigenvalues ---    0.43601   0.886071000.000001000.000001000.00000
     Eigenvalues --- 1000.000001000.000001000.000001000.000001000.00000
     Eigenvalues --- 1000.000001000.000001000.000001000.000001000.00000
 Angle between quadratic step and forces=  54.96 degrees.
 Linear search not attempted -- first point.
 Iteration  1 RMS(Cart)=  0.00000194 RMS(Int)=  0.00000000
 Iteration  2 RMS(Cart)=  0.00000000 RMS(Int)=  0.00000000
 Variable       Old X    -DE/DX   Delta X   Delta X   Delta X     New X
                                 (Linear)    (Quad)   (Total)
    R1        2.07520   0.00000   0.00000   0.00000   0.00000   2.07520
    R2        2.27011   0.00000   0.00000   0.00000   0.00000   2.27011
    R3        2.52970   0.00000   0.00000   0.00000   0.00000   2.52970
    R4        2.74723   0.00000   0.00000   0.00000   0.00000   2.74723
    R5        2.06202   0.00000   0.00000   0.00000   0.00000   2.06202
    R6        2.06202   0.00000   0.00000   0.00000   0.00000   2.06202
    R7        2.85685   0.00000   0.00000   0.00000   0.00000   2.85685
    R8        2.06142   0.00000   0.00000   0.00000   0.00000   2.06142
    R9        2.06346   0.00000   0.00000   0.00000   0.00000   2.06346
   R10        2.06142   0.00000   0.00000   0.00000   0.00000   2.06142
    A1        2.17705   0.00000   0.00000   0.00000   0.00000   2.17705
    A2        1.90513   0.00000   0.00000   0.00000   0.00000   1.90513
    A3        2.20101   0.00000   0.00000   0.00000   0.00000   2.20101
    A4        2.03561   0.00000   0.00000   0.00000   0.00000   2.03561
    A5        1.89365   0.00000   0.00000   0.00000   0.00000   1.89365
    A6        1.89365   0.00000   0.00000   0.00000   0.00000   1.89365
    A7        1.87901   0.00000   0.00000   0.00000   0.00000   1.87901
    A8        1.88224   0.00000   0.00000   0.00000   0.00000   1.88224
    A9        1.95679   0.00000   0.00000   0.00000   0.00000   1.95679
   A10        1.95679   0.00000   0.00000   0.00000   0.00000   1.95679
   A11        1.93825   0.00000   0.00000   0.00000   0.00000   1.93825
   A12        1.91273   0.00000   0.00000   0.00000   0.00000   1.91273
   A13        1.93825   0.00000   0.00000   0.00000   0.00000   1.93825
   A14        1.88988   0.00000   0.00000   0.00000   0.00000   1.88988
   A15        1.89354   0.00000   0.00000   0.00000   0.00000   1.89354
   A16        1.88988   0.00000   0.00000   0.00000   0.00000   1.88988
    D1        3.14159   0.00000   0.00000   0.00000   0.00000   3.14159
    D2        0.00000   0.00000   0.00000   0.00000   0.00000   0.00000
    D3       -1.02027   0.00000   0.00000   0.00000   0.00000  -1.02027
    D4        1.02028   0.00000   0.00000   0.00000   0.00000   1.02027
    D5       -3.14159   0.00000   0.00000   0.00000   0.00000  -3.14159
    D6        1.05435   0.00000   0.00000   0.00000   0.00000   1.05435
    D7       -3.14159   0.00000   0.00000   0.00000   0.00000  -3.14159
    D8       -1.05435   0.00000   0.00000   0.00000   0.00000  -1.05435
    D9       -1.02713   0.00000   0.00000   0.00000   0.00000  -1.02713
   D10        1.06011   0.00000   0.00000   0.00000   0.00000   1.06011
   D11       -3.13584   0.00000   0.00000   0.00000   0.00000  -3.13584
   D12        3.13584   0.00000   0.00000   0.00000   0.00000   3.13584
   D13       -1.06011   0.00000   0.00000   0.00000   0.00000  -1.06011
   D14        1.02713   0.00000   0.00000   0.00000   0.00000   1.02713
         Item               Value     Threshold  Converged?
 Maximum Force            0.000001     0.000015     YES
 RMS     Force            0.000000     0.000010     YES
 Maximum Displacement     0.000007     0.000060     YES
 RMS     Displacement     0.000002     0.000040     YES
 Predicted change in Energy=-1.777657D-12
 Optimization completed.
    -- Stationary point found.
                           ----------------------------
                           !   Optimized Parameters   !
                           ! (Angstroms and Degrees)  !
 --------------------------                            --------------------------
 ! Name  Definition              Value          Derivative Info.                !
 --------------------------------------------------------------------------------
 ! R1    R(1,2)                  1.0981         -DE/DX =    0.0                 !
 ! R2    R(1,3)                  1.2013         -DE/DX =    0.0                 !
 ! R3    R(1,4)                  1.3387         -DE/DX =    0.0                 !
 ! R4    R(4,5)                  1.4538         -DE/DX =    0.0                 !
 ! R5    R(5,6)                  1.0912         -DE/DX =    0.0                 !
 ! R6    R(5,7)                  1.0912         -DE/DX =    0.0                 !
 ! R7    R(5,8)                  1.5118         -DE/DX =    0.0                 !
 ! R8    R(8,9)                  1.0909         -DE/DX =    0.0                 !
 ! R9    R(8,10)                 1.0919         -DE/DX =    0.0                 !
 ! R10   R(8,11)                 1.0909         -DE/DX =    0.0                 !
 ! A1    A(2,1,3)              124.7355         -DE/DX =    0.0                 !
 ! A2    A(2,1,4)              109.1561         -DE/DX =    0.0                 !
 ! A3    A(3,1,4)              126.1084         -DE/DX =    0.0                 !
 ! A4    A(1,4,5)              116.6318         -DE/DX =    0.0                 !
 ! A5    A(4,5,6)              108.498          -DE/DX =    0.0                 !
 ! A6    A(4,5,7)              108.498          -DE/DX =    0.0                 !
 ! A7    A(4,5,8)              107.6592         -DE/DX =    0.0                 !
 ! A8    A(6,5,7)              107.8446         -DE/DX =    0.0                 !
 ! A9    A(6,5,8)              112.1159         -DE/DX =    0.0                 !
 ! A10   A(7,5,8)              112.1159         -DE/DX =    0.0                 !
 ! A11   A(5,8,9)              111.0535         -DE/DX =    0.0                 !
 ! A12   A(5,8,10)             109.5914         -DE/DX =    0.0                 !
 ! A13   A(5,8,11)             111.0535         -DE/DX =    0.0                 !
 ! A14   A(9,8,10)             108.2819         -DE/DX =    0.0                 !
 ! A15   A(9,8,11)             108.4918         -DE/DX =    0.0                 !
 ! A16   A(10,8,11)            108.2819         -DE/DX =    0.0                 !
 ! D1    D(2,1,4,5)            180.0            -DE/DX =    0.0                 !
 ! D2    D(3,1,4,5)              0.0            -DE/DX =    0.0                 !
 ! D3    D(1,4,5,6)            -58.4572         -DE/DX =    0.0                 !
 ! D4    D(1,4,5,7)             58.4576         -DE/DX =    0.0                 !
 ! D5    D(1,4,5,8)           -179.9998         -DE/DX =    0.0                 !
 ! D6    D(4,5,8,9)             60.41           -DE/DX =    0.0                 !
 ! D7    D(4,5,8,10)          -180.0            -DE/DX =    0.0                 !
 ! D8    D(4,5,8,11)           -60.4099         -DE/DX =    0.0                 !
 ! D9    D(6,5,8,9)            -58.8504         -DE/DX =    0.0                 !
 ! D10   D(6,5,8,10)            60.7396         -DE/DX =    0.0                 !
 ! D11   D(6,5,8,11)          -179.6703         -DE/DX =    0.0                 !
 ! D12   D(7,5,8,9)            179.6704         -DE/DX =    0.0                 !
 ! D13   D(7,5,8,10)           -60.7396         -DE/DX =    0.0                 !
 ! D14   D(7,5,8,11)            58.8505         -DE/DX =    0.0                 !
 --------------------------------------------------------------------------------
 GradGradGradGradGradGradGradGradGradGradGradGradGradGradGradGradGradGrad

 1\1\RECHENZENTRUM RWTH AACHEN-SRVMBFD\Freq\RB3LYP\TZVP\C3H6O2\JENS\27-
 Jan-2014\0\\#N Geom=AllCheck Guess=Read SCRF=Check GenChk RB3LYP/TZVP 
 Freq\\Title Card Required\\0,1\C,-1.4120047001,0.4505128531,0.00382925
 99\H,-1.9488517347,1.4081964039,-0.0200350367\O,-1.9385302811,-0.62856
 33535,0.0421744624\O,-0.0942071119,0.6850182122,-0.0166884374\C,0.7754
 409971,-0.4796442286,0.0101394352\H,0.5576975399,-1.0535893507,0.91226
 86887\H,0.5398524403,-1.1075223274,-0.8506332576\C,2.204059631,0.01397
 12406,-0.0194232772\H,2.4189860754,0.6438901716,0.8448535786\H,2.88638
 93061,-0.8383132081,-0.0002564044\H,2.401072838,0.5897525869,-0.924756
 0115\\Version=AM64L-G03RevE.01\State=1-A\HF=-268.4857434\RMSD=4.726e-0
 9\RMSF=1.018e-07\ZeroPoint=0.0902016\Thermal=0.0959614\Dipole=0.812009
 7,0.3070245,-0.0176145\DipoleDeriv=1.9659413,0.1817481,-0.0227306,0.56
 96611,1.1312188,-0.0321121,-0.0345992,-0.0281846,0.2713569,-0.0278742,
 0.0840471,-0.0013507,0.0981683,-0.1169819,0.0054211,-0.0017826,0.00556
 41,0.0925446,-0.8752608,-0.1022541,0.0083293,-0.5591632,-0.8690787,0.0
 211879,0.0223085,0.0165618,-0.3623244,-1.7514761,0.0386515,0.0136826,0
 .1734482,-0.6202234,0.0085526,0.0095587,0.0099175,-0.2836809,0.7728251
 ,-0.1887674,0.0013648,-0.362226,0.4511494,0.0001807,0.0066721,-0.00157
 55,0.3371594,-0.0338675,-0.0202358,0.0546168,0.0601899,-0.0110656,0.04
 73989,0.0217423,0.080677,-0.0619481,-0.0354464,-0.0252067,-0.0536828,0
 .0577345,-0.0190914,-0.0511703,-0.0258066,-0.0827945,-0.0523441,-0.051
 57,-0.0122152,0.0019297,-0.0169457,0.0878291,0.0006093,0.0020744,0.000
 5615,0.1021044,0.0369369,-0.0121399,-0.0008572,-0.0623405,0.0080941,-0
 .0841076,-0.0365229,-0.0927713,-0.0565621,-0.0379064,0.0666634,-0.0008
 286,0.0998561,-0.0605385,0.0033409,-0.0018441,0.0036769,0.0816119,0.03
 76983,-0.010291,-0.0004734,-0.0583827,0.0186882,0.0806985,0.0381994,0.
 0883671,-0.0679176\Polar=52.7370761,0.1611023,42.7135969,-0.1991511,-0
 .2818626,33.5646573\PG=C01 [X(C3H6O2)]\NImag=0\\0.63829643,0.09362981,
 1.00165590,-0.00737162,-0.02568354,0.19402714,-0.11109154,0.10168079,-
 0.00260923,0.13474036,0.10912874,-0.22657412,0.00394400,-0.11176363,0.
 26135120,-0.00283710,0.00401941,-0.06164119,0.00230924,-0.00609638,0.0
 2526345,-0.21185255,-0.23255442,0.00852181,0.01539165,0.00334331,-0.00
 004942,0.24970671,-0.21931780,-0.65344169,0.01998198,-0.01913518,-0.04
 127897,0.00208733,0.30685494,0.70779245,0.00811684,0.02011601,-0.07360
 306,0.00063831,0.00185973,0.02055034,-0.01162121,-0.02386954,0.0300080
 0,-0.27047556,-0.00679342,0.00231595,-0.03524699,0.00173587,0.00040066
 ,-0.06078212,-0.07270349,0.00313160,0.50173885,0.00076305,-0.12463144,
 0.00190004,0.03217576,0.00409388,-0.00015829,-0.06838522,-0.01111446,0
 .00191428,-0.01686653,0.32948371,0.00208474,0.00197656,-0.06235762,-0.
 00053064,0.00014993,0.00956963,0.00299948,0.00195799,0.02873183,-0.003
 77086,-0.00751269,0.07861747,-0.05470130,0.02871403,-0.00030798,-0.001
 91302,-0.00216796,0.00015946,0.00966434,0.01061882,-0.00049381,-0.0876
 0288,0.01307909,-0.00022569,0.47214733,0.02913888,0.01619735,-0.000740
 19,-0.00500362,0.00242147,0.00019946,-0.01162974,-0.01064605,0.0002286
 9,0.03486023,-0.15104710,0.00211520,0.07925414,0.48834598,-0.00032100,
 -0.00073592,0.00167327,0.00024622,0.00017074,0.00727709,0.00018687,0.0
 0000345,-0.00702217,-0.00089209,0.00233576,-0.07043732,-0.00095954,0.0
 0313036,0.61680702,0.00478447,0.00531385,-0.00152042,-0.00017414,-0.00
 011591,0.00118261,-0.00089397,-0.00290689,-0.00012712,-0.00485876,0.01
 897527,-0.01991105,-0.06085328,-0.03064370,0.04970458,0.06901713,-0.00
 581322,-0.00237644,0.00058771,0.00027545,-0.00008912,-0.00063311,0.001
 41134,0.00237081,0.00001864,0.00939937,-0.02682148,0.02305332,-0.02787
 843,-0.11302919,0.10421929,0.02453426,0.13124438,0.00299005,0.00236494
 ,0.00063106,-0.00019060,-0.00015616,-0.00045714,0.00032229,-0.00213999
 ,0.00036490,-0.00529600,0.00143707,0.00578561,0.04459892,0.10906941,-0
 .23846415,-0.04889252,-0.12089452,0.24880889,0.00475339,0.00534734,0.0
 0111252,-0.00019444,-0.00018521,-0.00117920,-0.00089648,-0.00285035,0.
 00032754,-0.00436196,0.02015123,0.01893407,-0.06279391,-0.03600216,-0.
 05108811,0.00275004,0.00252166,0.00588137,0.07103453,-0.00599638,-0.00
 254498,-0.00027268,0.00029892,-0.00004241,0.00060252,0.00138780,0.0024
 9366,-0.00017726,0.00926470,-0.02821225,-0.02117578,-0.03283250,-0.126
 47051,-0.11040405,0.00241529,0.01133962,0.01246132,0.03009028,0.146400
 78,-0.00271045,-0.00227740,0.00083067,0.00016722,0.00013443,-0.0004835
 8,-0.00038365,0.00206800,0.00024457,0.00494501,0.00023333,0.00667960,-
 0.04616404,-0.11519407,-0.22308209,-0.00652042,-0.01451178,-0.02132066
 ,0.05066894,0.12655165,0.23163497,0.00054468,0.00359050,-0.00011691,-0
 .00097959,-0.00001151,0.00001065,0.00011443,-0.00101750,0.00003972,-0.
 03597269,0.00279790,0.00029646,-0.18359483,-0.04674409,0.00240961,-0.0
 0616136,-0.00341179,0.00007950,-0.00670161,-0.00355804,0.00031695,0.49
 344837,-0.00144255,-0.00957516,0.00030296,0.00190761,0.00009587,-0.000
 02112,-0.00036414,0.00399231,-0.00008901,0.04424561,0.00520563,-0.0005
 5307,-0.06039774,-0.09805482,0.00095492,-0.01646470,-0.00358558,-0.001
 66711,-0.01806350,-0.00392491,0.00240661,-0.02537308,0.57040306,0.0000
 3710,0.00025199,-0.00015896,-0.00004807,-0.00000168,0.00003773,0.00001
 974,-0.00008240,0.00096500,-0.00097158,-0.00013349,0.00178189,0.002827
 31,0.00081670,-0.08687969,0.02741903,0.00779952,0.00216546,-0.02617949
 ,-0.00733899,0.00304502,0.00161057,0.00042411,0.57584127,-0.00089177,-
 0.00091644,0.00011080,0.00004037,0.00002569,-0.00003563,-0.00004786,0.
 00088544,0.00013756,0.00352884,-0.00013498,0.00049345,-0.00809314,-0.0
 2082085,-0.02886773,0.00142504,0.00064678,0.00035902,-0.00586801,-0.00
 143950,0.00084908,-0.05647244,-0.02704920,-0.03700669,0.06169057,0.000
 29226,0.00008601,0.00002660,-0.00006428,0.00002306,-0.00007228,-0.0001
 7682,-0.00003577,0.00012340,0.00027685,0.00117947,0.00092983,-0.001413
 23,-0.00821015,-0.00945033,0.00029143,-0.00008145,0.00006785,-0.002046
 49,0.00061925,0.00073154,-0.02958130,-0.13482354,-0.12002924,0.0341117
 4,0.14379623,-0.00022917,0.00006084,0.00005831,-0.00005418,0.00000287,
 -0.00001476,0.00019676,0.00020078,-0.00006054,-0.00021724,0.00045971,0
 .00024654,-0.00007580,0.00114026,0.00173416,-0.00058923,0.00025200,0.0
 0092975,0.00086011,-0.00002606,0.00150464,-0.03909767,-0.12081894,-0.2
 1730567,0.04257447,0.13328385,0.23185541,0.00152236,0.00290993,-0.0000
 9960,-0.00061484,-0.00001710,0.00000593,-0.00034908,-0.00129913,0.0000
 4181,-0.00948858,-0.00237887,0.00017940,-0.01476908,0.02661560,-0.0006
 8697,0.00086221,-0.00020269,0.00075737,0.00084952,-0.00024929,-0.00076
 099,-0.14925757,0.12544986,-0.00279445,0.00439723,-0.00560255,0.001245
 90,0.16283288,-0.00068849,0.00112361,-0.00001276,-0.00031240,-0.000028
 05,0.00000155,0.00030392,-0.00007622,-0.00000520,-0.00368740,0.0007728
 9,0.00004561,-0.00577322,0.00814639,-0.00025795,0.00070554,0.00044671,
 0.00008918,0.00071140,0.00043952,-0.00013100,0.12817208,-0.20932700,0.
 00369373,0.01082009,-0.01387297,0.00143915,-0.13996193,0.22508635,0.00
 001050,-0.00004918,0.00048020,0.00001496,-0.00000144,-0.00008087,-0.00
 000724,0.00001103,-0.00014583,0.00021942,0.00003237,0.00104051,0.00030
 390,-0.00058581,-0.00218060,-0.00016263,-0.00000425,-0.00001523,0.0001
 0183,-0.00001865,0.00000466,-0.00287773,0.00372129,-0.04626365,0.01742
 570,-0.01959525,0.00126841,0.00309220,-0.00408310,0.04540343,-0.000888
 61,-0.00092197,-0.00003532,0.00004218,0.00002770,0.00003280,-0.0000550
 7,0.00087113,-0.00019122,0.00352184,-0.00017671,-0.00054936,-0.0074902
 2,-0.01902471,0.03026816,-0.00589738,-0.00148273,-0.00060939,0.0014289
 2,0.00061873,-0.00040766,-0.05496738,-0.02244817,0.03508653,0.00029117
 ,0.00391239,-0.00461395,0.00401494,0.00971040,-0.01812092,0.05999960,0
 .00030569,0.00008095,-0.00003413,-0.00005943,0.00002718,0.00007091,-0.
 00019098,-0.00005606,-0.00011975,0.00026820,0.00109114,-0.00098688,-0.
 00120300,-0.00765337,0.01003374,-0.00210445,0.00058174,-0.00063198,0.0
 0032580,-0.00009778,-0.00001130,-0.02486317,-0.12040586,0.11459974,0.0
 0387123,0.01131983,-0.01599447,-0.00526382,-0.01271124,0.02057300,0.02
 891394,0.12782347,0.00023010,-0.00004370,0.00006019,0.00005677,-0.0000
 0603,-0.00002069,-0.00018542,-0.00021863,-0.00003304,0.00013513,-0.000
 50809,0.00034188,0.00033729,-0.00018000,0.00057448,-0.00058283,0.00011
 317,0.00157153,0.00056042,-0.00020202,0.00094219,0.03732885,0.11533936
 ,-0.23322840,0.00395996,0.01398403,-0.02021624,-0.00098059,-0.00077922
 ,0.00048897,-0.04085967,-0.12749888,0.24951913\\-0.00000021,-0.0000001
 8,0.00000002,-0.00000007,-0.00000001,0.,-0.00000022,-0.00000003,0.,0.,
 -0.00000015,-0.00000002,0.00000037,-0.00000001,0.00000002,0.,0.0000001
 2,-0.00000002,0.,0.00000011,0.,0.00000011,-0.00000003,0.,-0.00000002,0
 .00000005,0.,0.00000005,0.00000007,0.,-0.00000001,0.00000006,0.\\\@


 ACCORDING TO HEN3RY, LIFE IS MUCH LIKE A SEWER........
 YOU GET OUT OF IT JUST WHAT YOU PUT INTO IT...........
                         TOM LEHRER - (THE 3 IS SILENT)
 Job cpu time:  0 days  0 hours 15 minutes 38.8 seconds.
 File lengths (MBytes):  RWF=     29 Int=      0 D2E=      0 Chk=      7 Scr=      1
 Normal termination of Gaussian 03 at Mon Jan 27 12:43:17 2014.
