# Supplementary material for: CO from CO2and fluctuating renewable energy via formic-acid derivatives
Source: Royal Society of Chemistry journal article supplement (doi:10.1039/c6gc01202g), 2016-01-01
Supplement: c6gc01202g11.log [file c6gc01202g11.log]

 Entering Gaussian System, Link 0=/opt/mbfd/GAUSSIAN/LINUX64/g03.e01/g03
 Input=EtOH_opt_freq_B3LYP_TZVP.com
 Output=EtOH_opt_freq_B3LYP_TZVP.log
 Initial command:
 /opt/mbfd/GAUSSIAN/LINUX64/g03.e01/l1.exe /tmp/gaussianscratch/Gau-24829.inp -scrdir=/tmp/gaussianscratch/
 Entering Link 1 = /opt/mbfd/GAUSSIAN/LINUX64/g03.e01/l1.exe PID=     24833.
  
 Copyright (c) 1988,1990,1992,1993,1995,1998,2003,2004,2007, Gaussian, Inc.
                  All Rights Reserved.
  
 This is the Gaussian(R) 03 program.  It is based on the
 the Gaussian(R) 98 system (copyright 1998, Gaussian, Inc.),
 the Gaussian(R) 94 system (copyright 1995, Gaussian, Inc.),
 the Gaussian 92(TM) system (copyright 1992, Gaussian, Inc.),
 the Gaussian 90(TM) system (copyright 1990, Gaussian, Inc.),
 the Gaussian 88(TM) system (copyright 1988, Gaussian, Inc.),
 the Gaussian 86(TM) system (copyright 1986, Carnegie Mellon
 University), and the Gaussian 82(TM) system (copyright 1983,
 Carnegie Mellon University). Gaussian is a federally registered
 trademark of Gaussian, Inc.
  
 This software contains proprietary and confidential information,
 including trade secrets, belonging to Gaussian, Inc.
  
 This software is provided under written license and may be
 used, copied, transmitted, or stored only in accord with that
 written license.
  
 The following legend is applicable only to US Government
 contracts under FAR:
  
                    RESTRICTED RIGHTS LEGEND
  
 Use, reproduction and disclosure by the US Government is
 subject to restrictions as set forth in subparagraphs (a)
 and (c) of the Commercial Computer Software - Restricted
 Rights clause in FAR 52.227-19.
  
 Gaussian, Inc.
 340 Quinnipiac St., Bldg. 40, Wallingford CT 06492
  
  
 ---------------------------------------------------------------
 Warning -- This program may not be used in any manner that
 competes with the business of Gaussian, Inc. or will provide
 assistance to any competitor of Gaussian, Inc.  The licensee
 of this program is prohibited from giving any competitor of
 Gaussian, Inc. access to this program.  By using this program,
 the user acknowledges that Gaussian, Inc. is engaged in the
 business of creating and licensing software in the field of
 computational chemistry and represents and warrants to the
 licensee that it is not a competitor of Gaussian, Inc. and that
 it will not use this program in any manner prohibited above.
 ---------------------------------------------------------------
  

 Cite this work as:
 Gaussian 03, Revision E.01,
 M. J. Frisch, G. W. Trucks, H. B. Schlegel, G. E. Scuseria, 
 M. A. Robb, J. R. Cheeseman, J. A. Montgomery, Jr., T. Vreven, 
 K. N. Kudin, J. C. Burant, J. M. Millam, S. S. Iyengar, J. Tomasi, 
 V. Barone, B. Mennucci, M. Cossi, G. Scalmani, N. Rega, 
 G. A. Petersson, H. Nakatsuji, M. Hada, M. Ehara, K. Toyota, 
 R. Fukuda, J. Hasegawa, M. Ishida, T. Nakajima, Y. Honda, O. Kitao, 
 H. Nakai, M. Klene, X. Li, J. E. Knox, H. P. Hratchian, J. B. Cross, 
 V. Bakken, C. Adamo, J. Jaramillo, R. Gomperts, R. E. Stratmann, 
 O. Yazyev, A. J. Austin, R. Cammi, C. Pomelli, J. W. Ochterski, 
 P. Y. Ayala, K. Morokuma, G. A. Voth, P. Salvador, J. J. Dannenberg, 
 V. G. Zakrzewski, S. Dapprich, A. D. Daniels, M. C. Strain, 
 O. Farkas, D. K. Malick, A. D. Rabuck, K. Raghavachari, 
 J. B. Foresman, J. V. Ortiz, Q. Cui, A. G. Baboul, S. Clifford, 
 J. Cioslowski, B. B. Stefanov, G. Liu, A. Liashenko, P. Piskorz, 
 I. Komaromi, R. L. Martin, D. J. Fox, T. Keith, M. A. Al-Laham, 
 C. Y. Peng, A. Nanayakkara, M. Challacombe, P. M. W. Gill, 
 B. Johnson, W. Chen, M. W. Wong, C. Gonzalez, and J. A. Pople, 
 Gaussian, Inc., Wallingford CT, 2004.
 
 ******************************************
 Gaussian 03:  AM64L-G03RevE.01 11-Sep-2007
                29-Jun-2012 
 ******************************************
 %chk=EtOH_opt_freq_B3LYP_TZVP.chk
 %mem=2000MB
 %nproc=1
 Will use up to    1 processors via shared memory.
 Default route: MaxDisk=200000000
 -----------------------------------------------------------------
 # opt=(tight,calcall) freq B3LYP TZVP int=ultrafine maxdisk=300GB
 -----------------------------------------------------------------
 1/7=10,10=4,14=-1,18=20,26=3,38=1/1,3;
 2/9=110,17=6,18=5,40=1/2;
 3/5=19,7=101,11=2,16=1,25=1,30=1,74=-5,75=5/1,2,3;
 4//1;
 5/5=2,38=5/2;
 8/6=4,10=90,11=11/1;
 11/6=1,8=1,9=11,15=111,16=1/1,2,10;
 10/6=1/2;
 6/7=2,8=2,9=2,10=2,18=1,28=1/1;
 7/10=1,25=1/1,2,3,16;
 1/10=4,14=-1,18=20/3(3);
 2/9=110/2;
 7/8=1,9=1,25=1,44=-1/16;
 99//99;
 2/9=110/2;
 3/5=19,7=101,11=2,16=1,25=1,30=1,74=-5,75=5/1,2,3;
 4/5=5,16=3/1;
 5/5=2,38=5/2;
 8/6=4,10=90,11=11/1;
 11/6=1,8=1,9=11,15=111,16=1/1,2,10;
 10/6=1/2;
 7/10=1,25=1/1,2,3,16;
 1/10=4,14=-1,18=20/3(-8);
 2/9=110/2;
 6/7=2,8=2,9=2,10=2,18=1,19=2,28=1/1;
 7/8=1,9=1,25=1,44=-1/16;
 99//99;
 -------------------
 Title Card Required
 -------------------
 Symbolic Z-matrix:
 Charge =  0 Multiplicity = 1
 C
 H                    1    B1
 H                    1    B2       2    A1
 O                    1    B3       3    A2       2    D1       0
 H                    4    B4       1    A3       3    D2       0
 C                    1    B5       4    A4       5    D3       0
 H                    6    B6       1    A5       4    D4       0
 H                    6    B7       1    A6       4    D5       0
 H                    6    B8       1    A7       4    D6       0
       Variables:
  B1                    1.07                     
  B2                    1.07                     
  B3                    1.43                     
  B4                    0.96                     
  B5                    1.54                     
  B6                    1.07                     
  B7                    1.07                     
  B8                    1.07                     
  A1                  109.47125                  
  A2                  109.4712                   
  A3                  109.5                      
  A4                  109.47123                  
  A5                  109.4712                   
  A6                  109.4712                   
  A7                  109.47123                  
  D1                 -119.99999                  
  D2                  -60.01109                  
  D3                   59.9889                   
  D4                  175.51179                  
  D5                  -64.48819                  
  D6                   55.5118                   
 
     6 tetrahedral angles replaced.

 GradGradGradGradGradGradGradGradGradGradGradGradGradGradGradGradGradGrad
 Berny optimization.
 Initialization pass.
                           ----------------------------
                           !    Initial Parameters    !
                           ! (Angstroms and Degrees)  !
 --------------------------                            --------------------------
 ! Name  Definition              Value          Derivative Info.                !
 --------------------------------------------------------------------------------
 ! R1    R(1,2)                  1.07           calculate D2E/DX2 analytically  !
 ! R2    R(1,3)                  1.07           calculate D2E/DX2 analytically  !
 ! R3    R(1,4)                  1.43           calculate D2E/DX2 analytically  !
 ! R4    R(1,6)                  1.54           calculate D2E/DX2 analytically  !
 ! R5    R(4,5)                  0.96           calculate D2E/DX2 analytically  !
 ! R6    R(6,7)                  1.07           calculate D2E/DX2 analytically  !
 ! R7    R(6,8)                  1.07           calculate D2E/DX2 analytically  !
 ! R8    R(6,9)                  1.07           calculate D2E/DX2 analytically  !
 ! A1    A(2,1,3)              109.4712         calculate D2E/DX2 analytically  !
 ! A2    A(2,1,4)              109.4712         calculate D2E/DX2 analytically  !
 ! A3    A(2,1,6)              109.4712         calculate D2E/DX2 analytically  !
 ! A4    A(3,1,4)              109.4712         calculate D2E/DX2 analytically  !
 ! A5    A(3,1,6)              109.4712         calculate D2E/DX2 analytically  !
 ! A6    A(4,1,6)              109.4712         calculate D2E/DX2 analytically  !
 ! A7    A(1,4,5)              109.5            calculate D2E/DX2 analytically  !
 ! A8    A(1,6,7)              109.4712         calculate D2E/DX2 analytically  !
 ! A9    A(1,6,8)              109.4712         calculate D2E/DX2 analytically  !
 ! A10   A(1,6,9)              109.4712         calculate D2E/DX2 analytically  !
 ! A11   A(7,6,8)              109.4712         calculate D2E/DX2 analytically  !
 ! A12   A(7,6,9)              109.4712         calculate D2E/DX2 analytically  !
 ! A13   A(8,6,9)              109.4712         calculate D2E/DX2 analytically  !
 ! D1    D(2,1,4,5)            179.9889         calculate D2E/DX2 analytically  !
 ! D2    D(3,1,4,5)            -60.0111         calculate D2E/DX2 analytically  !
 ! D3    D(6,1,4,5)             59.9889         calculate D2E/DX2 analytically  !
 ! D4    D(2,1,6,7)             55.5118         calculate D2E/DX2 analytically  !
 ! D5    D(2,1,6,8)            175.5118         calculate D2E/DX2 analytically  !
 ! D6    D(2,1,6,9)            -64.4882         calculate D2E/DX2 analytically  !
 ! D7    D(3,1,6,7)            -64.4882         calculate D2E/DX2 analytically  !
 ! D8    D(3,1,6,8)             55.5118         calculate D2E/DX2 analytically  !
 ! D9    D(3,1,6,9)            175.5118         calculate D2E/DX2 analytically  !
 ! D10   D(4,1,6,7)            175.5118         calculate D2E/DX2 analytically  !
 ! D11   D(4,1,6,8)            -64.4882         calculate D2E/DX2 analytically  !
 ! D12   D(4,1,6,9)             55.5118         calculate D2E/DX2 analytically  !
 --------------------------------------------------------------------------------
 Trust Radius=3.00D-01 FncErr=1.00D-07 GrdErr=1.00D-06
 Number of steps in this run=  43 maximum allowed number of steps= 100.
 GradGradGradGradGradGradGradGradGradGradGradGradGradGradGradGradGradGrad

                          Input orientation:                          
 ---------------------------------------------------------------------
 Center     Atomic     Atomic              Coordinates (Angstroms)
 Number     Number      Type              X           Y           Z
 ---------------------------------------------------------------------
    1          6             0        0.000000    0.000000    0.000000
    2          1             0        0.000000    0.000000    1.070000
    3          1             0        1.008806    0.000000   -0.356667
    4          8             0       -0.674108   -1.167590   -0.476666
    5          1             0       -0.674501   -1.167921   -1.436666
    6          6             0       -0.725963    1.257405   -0.513334
    7          1             0       -0.269200    2.129270   -0.093669
    8          1             0       -0.658112    1.297769   -1.580417
    9          1             0       -1.754980    1.218826   -0.222582
 ---------------------------------------------------------------------
                    Distance matrix (angstroms):
                    1          2          3          4          5
     1  C    0.000000
     2  H    1.070000   0.000000
     3  H    1.070000   1.747303   0.000000
     4  O    1.430000   2.051796   2.051796   0.000000
     5  H    1.970533   2.846466   2.316022   0.960000   0.000000
     6  C    1.540000   2.148263   2.148263   2.425826   2.595649
     7  H    2.148263   2.441390   2.497250   3.343640   3.583207
     8  H    2.148263   3.023578   2.441390   2.701206   2.469930
     9  H    2.148263   2.497250   3.023578   2.632076   2.887558
                    6          7          8          9
     6  C    0.000000
     7  H    1.070000   0.000000
     8  H    1.070000   1.747303   0.000000
     9  H    1.070000   1.747303   1.747303   0.000000
 Stoichiometry    C2H6O
 Framework group  C1[X(C2H6O)]
 Deg. of freedom    21
 Full point group                 C1
 Largest Abelian subgroup         C1      NOp   1
 Largest concise Abelian subgroup C1      NOp   1
                         Standard orientation:                         
 ---------------------------------------------------------------------
 Center     Atomic     Atomic              Coordinates (Angstroms)
 Number     Number      Type              X           Y           Z
 ---------------------------------------------------------------------
    1          6             0       -0.084144    0.587683    0.045551
    2          1             0       -0.073754    1.316108   -0.738151
    3          1             0       -0.137695    1.083211    0.992380
    4          8             0       -1.221397   -0.264947   -0.111218
    5          1             0       -1.231029   -0.918785    0.591636
    6          6             0        1.202711   -0.255676   -0.020401
    7          1             0        2.054856    0.390273    0.018310
    8          1             0        1.229293   -0.931255    0.808929
    9          1             0        1.218098   -0.812017   -0.934265
 ---------------------------------------------------------------------
 Rotational constants (GHZ):     33.3553502      9.4350004      8.2187538
 Standard basis: TZVP (5D, 7F)
 There are    93 symmetry adapted basis functions of A   symmetry.
 Integral buffers will be    131072 words long.
 Raffenetti 2 integral format.
 Two-electron integral symmetry is turned on.
    93 basis functions,   153 primitive gaussians,    96 cartesian basis functions
    13 alpha electrons       13 beta electrons
       nuclear repulsion energy        82.0213564387 Hartrees.
 NAtoms=    9 NActive=    9 NUniq=    9 SFac= 7.50D-01 NAtFMM=   80 NAOKFM=F Big=F
 One-electron integrals computed using PRISM.
 NBasis=    93 RedAO= T  NBF=    93
 NBsUse=    93 1.00D-06 NBFU=    93
 Harris functional with IExCor=  402 diagonalized for initial guess.
 ExpMin= 9.52D-02 ExpMax= 2.70D+04 ExpMxC= 9.22D+02 IAcc=3 IRadAn=         5 AccDes= 0.00D+00
 HarFok:  IExCor= 402 AccDes= 0.00D+00 IRadAn=         5 IDoV=1
 ScaDFX=  1.000000  1.000000  1.000000  1.000000
 Initial guess orbital symmetries:
       Occupied  (A) (A) (A) (A) (A) (A) (A) (A) (A) (A) (A) (A)
                 (A)
       Virtual   (A) (A) (A) (A) (A) (A) (A) (A) (A) (A) (A) (A)
                 (A) (A) (A) (A) (A) (A) (A) (A) (A) (A) (A) (A)
                 (A) (A) (A) (A) (A) (A) (A) (A) (A) (A) (A) (A)
                 (A) (A) (A) (A) (A) (A) (A) (A) (A) (A) (A) (A)
                 (A) (A) (A) (A) (A) (A) (A) (A) (A) (A) (A) (A)
                 (A) (A) (A) (A) (A) (A) (A) (A) (A) (A) (A) (A)
                 (A) (A) (A) (A) (A) (A) (A) (A)
 The electronic state of the initial guess is 1-A.
 Requested convergence on RMS density matrix=1.00D-08 within 128 cycles.
 Requested convergence on MAX density matrix=1.00D-06.
 Requested convergence on             energy=1.00D-06.
 No special actions if energy rises.
 Keep R1 integrals in memory in canonical form, NReq=    12835505.
 Integral accuracy reduced to 1.0D-05 until final iterations.
 Initial convergence to 1.0D-05 achieved.  Increase integral accuracy.
 SCF Done:  E(RB+HF-LYP) =  -155.100907131     A.U. after   12 cycles
             Convg  =    0.2837D-08             -V/T =  2.0040
             S**2   =   0.0000
 Range of M.O.s used for correlation:     1    93
 NBasis=    93 NAE=    13 NBE=    13 NFC=     0 NFV=     0
 NROrb=     93 NOA=    13 NOB=    13 NVA=    80 NVB=    80

 **** Warning!!: The largest alpha MO coefficient is  0.19509384D+02

 Symmetrizing basis deriv contribution to polar:
 IMax=3 JMax=2 DiffMx= 0.00D+00
 G2DrvN: will do   10 centers at a time, making    1 passes doing MaxLOS=2.
 FoFDir/FoFCou used for L=0 through L=2.
 DoAtom=TTTTTTTTT
          Differentiating once with respect to electric field.
                with respect to dipole field.
          Differentiating once with respect to nuclear coordinates.
          Store integrals in memory, NReq=    11662372.
          There are  30 degrees of freedom in the 1st order CPHF.
    27 vectors were produced by pass  0.
 AX will form  27 AO Fock derivatives at one time.
    27 vectors were produced by pass  1.
    27 vectors were produced by pass  2.
    27 vectors were produced by pass  3.
    27 vectors were produced by pass  4.
    12 vectors were produced by pass  5.
     3 vectors were produced by pass  6.
 Inv2:  IOpt= 1 Iter= 1 AM= 1.38D-15 Conv= 1.00D-12.
 Inverted reduced A of dimension  150 with in-core refinement.
 Isotropic polarizability for W=    0.000000       29.59 Bohr**3.
 End of Minotr Frequency-dependent properties file   721 does not exist.

 **********************************************************************

            Population analysis using the SCF density.

 **********************************************************************

 Orbital symmetries:
       Occupied  (A) (A) (A) (A) (A) (A) (A) (A) (A) (A) (A) (A)
                 (A)
       Virtual   (A) (A) (A) (A) (A) (A) (A) (A) (A) (A) (A) (A)
                 (A) (A) (A) (A) (A) (A) (A) (A) (A) (A) (A) (A)
                 (A) (A) (A) (A) (A) (A) (A) (A) (A) (A) (A) (A)
                 (A) (A) (A) (A) (A) (A) (A) (A) (A) (A) (A) (A)
                 (A) (A) (A) (A) (A) (A) (A) (A) (A) (A) (A) (A)
                 (A) (A) (A) (A) (A) (A) (A) (A) (A) (A) (A) (A)
                 (A) (A) (A) (A) (A) (A) (A) (A)
 The electronic state is 1-A.
 Alpha  occ. eigenvalues --  -19.12063 -10.21510 -10.15907  -1.01964  -0.75360
 Alpha  occ. eigenvalues --   -0.63384  -0.50930  -0.46547  -0.43400  -0.38909
 Alpha  occ. eigenvalues --   -0.38234  -0.33047  -0.27564
 Alpha virt. eigenvalues --    0.02512   0.06326   0.08450   0.10619   0.11482
 Alpha virt. eigenvalues --    0.12896   0.14261   0.17894   0.19782   0.22843
 Alpha virt. eigenvalues --    0.27582   0.28705   0.31370   0.37759   0.38856
 Alpha virt. eigenvalues --    0.40729   0.42394   0.45282   0.45969   0.50291
 Alpha virt. eigenvalues --    0.51693   0.54930   0.55679   0.58508   0.60335
 Alpha virt. eigenvalues --    0.81855   1.12581   1.17655   1.24624   1.25919
 Alpha virt. eigenvalues --    1.29633   1.31861   1.33731   1.36170   1.39385
 Alpha virt. eigenvalues --    1.45262   1.48524   1.52216   1.54186   1.58535
 Alpha virt. eigenvalues --    1.64048   1.75901   1.79536   1.80191   1.85077
 Alpha virt. eigenvalues --    1.85471   1.88763   1.96355   2.00760   2.10057
 Alpha virt. eigenvalues --    2.17256   2.20333   2.27095   2.32876   2.36331
 Alpha virt. eigenvalues --    2.41043   2.52983   2.53686   2.56679   2.61145
 Alpha virt. eigenvalues --    2.64012   2.67552   2.70821   2.71149   2.88992
 Alpha virt. eigenvalues --    2.92264   2.96549   3.06145   3.10097   3.17035
 Alpha virt. eigenvalues --    3.20217   3.33373   3.34324   3.38599   3.41554
 Alpha virt. eigenvalues --    3.94973   4.31888  21.91695  22.06384  43.43268
          Condensed to atoms (all electrons):
              1          2          3          4          5          6
     1  C    4.898723   0.394289   0.396364   0.242663  -0.040188   0.293255
     2  H    0.394289   0.619058  -0.052852  -0.043944   0.011986  -0.049391
     3  H    0.396364  -0.052852   0.665192  -0.049491  -0.010854  -0.060294
     4  O    0.242663  -0.043944  -0.049491   7.990391   0.298114  -0.052050
     5  H   -0.040188   0.011986  -0.010854   0.298114   0.483136  -0.007805
     6  C    0.293255  -0.049391  -0.060294  -0.052050  -0.007805   5.075313
     7  H   -0.041052  -0.000375   0.006358   0.010671   0.000409   0.367776
     8  H   -0.034466   0.011464  -0.014507  -0.006378   0.008120   0.396879
     9  H   -0.043084  -0.010880   0.012451   0.005366  -0.002603   0.403412
              7          8          9
     1  C   -0.041052  -0.034466  -0.043084
     2  H   -0.000375   0.011464  -0.010880
     3  H    0.006358  -0.014507   0.012451
     4  O    0.010671  -0.006378   0.005366
     5  H    0.000409   0.008120  -0.002603
     6  C    0.367776   0.396879   0.403412
     7  H    0.598040  -0.027167  -0.022696
     8  H   -0.027167   0.598373  -0.036144
     9  H   -0.022696  -0.036144   0.565064
 Mulliken atomic charges:
              1
     1  C   -0.066503
     2  H    0.120645
     3  H    0.107633
     4  O   -0.395342
     5  H    0.259685
     6  C   -0.367095
     7  H    0.108037
     8  H    0.103826
     9  H    0.129113
 Sum of Mulliken charges=   0.00000
 Atomic charges with hydrogens summed into heavy atoms:
              1
     1  C    0.161776
     2  H    0.000000
     3  H    0.000000
     4  O   -0.135656
     5  H    0.000000
     6  C   -0.026119
     7  H    0.000000
     8  H    0.000000
     9  H    0.000000
 Sum of Mulliken charges=   0.00000
 APT atomic charges:
              1
     1  C    0.529820
     2  H   -0.029486
     3  H   -0.079835
     4  O   -0.621315
     5  H    0.245259
     6  C   -0.005743
     7  H   -0.013361
     8  H   -0.021266
     9  H   -0.004073
 Sum of APT charges=   0.00000
 APT Atomic charges with hydrogens summed into heavy atoms:
              1
     1  C    0.420499
     2  H    0.000000
     3  H    0.000000
     4  O   -0.376056
     5  H    0.000000
     6  C   -0.044443
     7  H    0.000000
     8  H    0.000000
     9  H    0.000000
 Sum of APT charges=   0.00000
 Electronic spatial extent (au):  <R**2>=   192.9815
 Charge=     0.0000 electrons
 Dipole moment (field-independent basis, Debye):
    X=     1.2976    Y=    -0.0928    Z=     1.2401  Tot=     1.7973
 Quadrupole moment (field-independent basis, Debye-Ang):
   XX=   -22.8416   YY=   -18.6182   ZZ=   -19.3070
   XY=     1.1013   XZ=    -1.9435   YZ=    -1.5416
 Traceless Quadrupole moment (field-independent basis, Debye-Ang):
   XX=    -2.5860   YY=     1.6374   ZZ=     0.9486
   XY=     1.1013   XZ=    -1.9435   YZ=    -1.5416
 Octapole moment (field-independent basis, Debye-Ang**2):
  XXX=    -1.2831  YYY=    -1.9224  ZZZ=     0.5608  XYY=    -3.2854
  XXY=    -1.2311  XXZ=     2.3175  XZZ=    -2.1676  YZZ=    -0.7852
  YYZ=     0.8476  XYZ=     1.7352
 Hexadecapole moment (field-independent basis, Debye-Ang**3):
 XXXX=  -164.4884 YYYY=   -58.3749 ZZZZ=   -34.5938 XXXY=     7.0963
 XXXZ=    -3.5031 YYYX=     4.5511 YYYZ=    -2.7081 ZZZX=    -1.5804
 ZZZY=    -1.1784 XXYY=   -33.6153 XXZZ=   -32.0871 YYZZ=   -13.9697
 XXYZ=    -2.3085 YYXZ=    -1.6089 ZZXY=     0.5808
 N-N= 8.202135643866D+01 E-N=-5.267029136010D+02  KE= 1.544830382969D+02
  Exact polarizability:  31.269   0.494  29.739  -0.359  -0.710  27.759
 Approx polarizability:  37.798   1.873  38.331   0.056  -1.474  37.088
 ***** Axes restored to original set *****
 -------------------------------------------------------------------
 Center     Atomic                   Forces (Hartrees/Bohr)
 Number     Number              X              Y              Z
 -------------------------------------------------------------------
    1          6          -0.023386094    0.010304098   -0.025586927
    2          1          -0.001440369   -0.007244557    0.012828031
    3          1           0.018005766    0.000809049   -0.001777251
    4          8          -0.000018674   -0.007380466    0.013170303
    5          1           0.001545394    0.002430775   -0.002340236
    6          6           0.014063094   -0.017775729    0.012006457
    7          1           0.005082180    0.015026384    0.003668516
    8          1          -0.000174315    0.003223431   -0.015274636
    9          1          -0.013676983    0.000607015    0.003305743
 -------------------------------------------------------------------
 Cartesian Forces:  Max     0.025586927 RMS     0.011323013

 GradGradGradGradGradGradGradGradGradGradGradGradGradGradGradGradGradGrad
 Berny optimization.
 Internal  Forces:  Max     0.017568695 RMS     0.007001555
 Search for a local minimum.
 Step number   1 out of a maximum of  43
 All quantities printed in internal units (Hartrees-Bohrs-Radians)
 Second derivative matrix not updated -- analytic derivatives used.
     Eigenvalues ---    0.00206   0.00305   0.04513   0.04569   0.05011
     Eigenvalues ---    0.06401   0.09746   0.11683   0.12634   0.13189
     Eigenvalues ---    0.15794   0.17008   0.25193   0.27623   0.34679
     Eigenvalues ---    0.37465   0.37938   0.38120   0.38648   0.39253
     Eigenvalues ---    0.534391000.000001000.000001000.000001000.00000
     Eigenvalues --- 1000.000001000.000001000.000001000.000001000.00000
     Eigenvalues --- 1000.000001000.000001000.00000
 RFO step:  Lambda=-6.03540649D-03.
 Linear search not attempted -- first point.
 Iteration  1 RMS(Cart)=  0.03538869 RMS(Int)=  0.00106082
 Iteration  2 RMS(Cart)=  0.00102103 RMS(Int)=  0.00053087
 Iteration  3 RMS(Cart)=  0.00000041 RMS(Int)=  0.00053087
 Variable       Old X    -DE/DX   Delta X   Delta X   Delta X     New X
                                 (Linear)    (Quad)   (Total)
    R1        2.02201   0.01283   0.00000   0.03591   0.03591   2.05792
    R2        2.02201   0.01757   0.00000   0.04762   0.04762   2.06962
    R3        2.70231  -0.00029   0.00000  -0.00368  -0.00368   2.69863
    R4        2.91018  -0.00285   0.00000  -0.03501  -0.03501   2.87517
    R5        1.81414   0.00234   0.00000   0.00666   0.00666   1.82079
    R6        2.02201   0.01585   0.00000   0.04055   0.04055   2.06255
    R7        2.02201   0.01534   0.00000   0.04168   0.04168   2.06369
    R8        2.02201   0.01403   0.00000   0.03765   0.03765   2.05966
    A1        1.91063  -0.00073   0.00000  -0.03196  -0.03219   1.87844
    A2        1.91063  -0.01062   0.00000  -0.07140  -0.07155   1.83909
    A3        1.91063   0.00180   0.00000   0.01862   0.01938   1.93002
    A4        1.91063  -0.00150   0.00000   0.01682   0.01507   1.92571
    A5        1.91063  -0.00205   0.00000   0.01108   0.00990   1.92053
    A6        1.91063   0.01311   0.00000   0.05684   0.05604   1.96668
    A7        1.91114  -0.00522   0.00000  -0.01968  -0.01968   1.89146
    A8        1.91063   0.00431   0.00000   0.02131   0.02107   1.93170
    A9        1.91063   0.00298   0.00000   0.02852   0.02824   1.93888
   A10        1.91063   0.00046   0.00000   0.01825   0.01797   1.92860
   A11        1.91063  -0.00366   0.00000  -0.03050  -0.03073   1.87990
   A12        1.91063  -0.00216   0.00000  -0.01676  -0.01699   1.89365
   A13        1.91063  -0.00192   0.00000  -0.02081  -0.02111   1.88952
    D1        3.14140   0.00409   0.00000   0.02488   0.02379  -3.11799
    D2       -1.04739  -0.00424   0.00000  -0.04769  -0.04776  -1.09515
    D3        1.04700   0.00036   0.00000   0.01099   0.01215   1.05915
    D4        0.96886   0.00118   0.00000   0.03022   0.03006   0.99892
    D5        3.06326   0.00116   0.00000   0.02339   0.02320   3.08646
    D6       -1.12553   0.00091   0.00000   0.02653   0.02639  -1.09914
    D7       -1.12553   0.00224   0.00000   0.05118   0.05155  -1.07398
    D8        0.96886   0.00221   0.00000   0.04435   0.04470   1.01357
    D9        3.06326   0.00197   0.00000   0.04749   0.04789   3.11115
   D10        3.06326  -0.00270   0.00000  -0.01101  -0.01122   3.05204
   D11       -1.12553  -0.00272   0.00000  -0.01785  -0.01807  -1.14360
   D12        0.96886  -0.00297   0.00000  -0.01470  -0.01489   0.95398
         Item               Value     Threshold  Converged?
 Maximum Force            0.017569     0.000015     NO 
 RMS     Force            0.007002     0.000010     NO 
 Maximum Displacement     0.082417     0.000060     NO 
 RMS     Displacement     0.035052     0.000040     NO 
 Predicted change in Energy=-3.126381D-03
 GradGradGradGradGradGradGradGradGradGradGradGradGradGradGradGradGradGrad

                          Input orientation:                          
 ---------------------------------------------------------------------
 Center     Atomic     Atomic              Coordinates (Angstroms)
 Number     Number      Type              X           Y           Z
 ---------------------------------------------------------------------
    1          6             0       -0.014475    0.003360   -0.025550
    2          1             0       -0.018292   -0.041365    1.062529
    3          1             0        1.030436    0.009982   -0.353539
    4          8             0       -0.662120   -1.194414   -0.455931
    5          1             0       -0.663522   -1.209573   -1.419333
    6          6             0       -0.721461    1.259826   -0.511704
    7          1             0       -0.254284    2.152114   -0.091176
    8          1             0       -0.674028    1.341382   -1.599677
    9          1             0       -1.770314    1.246446   -0.215620
 ---------------------------------------------------------------------
                    Distance matrix (angstroms):
                    1          2          3          4          5
     1  C    0.000000
     2  H    1.089005   0.000000
     3  H    1.095198   1.762871   0.000000
     4  O    1.428053   2.012402   2.079856   0.000000
     5  H    1.958341   2.817920   2.343656   0.963522   0.000000
     6  C    1.521473   2.160036   2.157839   2.455591   2.631554
     7  H    2.163090   2.489594   2.511587   3.390963   3.637639
     8  H    2.168683   3.070720   2.496134   2.781826   2.557343
     9  H    2.159713   2.522243   3.064648   2.691402   2.950584
                    6          7          8          9
     6  C    0.000000
     7  H    1.091456   0.000000
     8  H    1.092056   1.763249   0.000000
     9  H    1.089926   1.770330   1.768183   0.000000
 Stoichiometry    C2H6O
 Framework group  C1[X(C2H6O)]
 Deg. of freedom    21
 Full point group                 C1
 Largest Abelian subgroup         C1      NOp   1
 Largest concise Abelian subgroup C1      NOp   1
                         Standard orientation:                         
 ---------------------------------------------------------------------
 Center     Atomic     Atomic              Coordinates (Angstroms)
 Number     Number      Type              X           Y           Z
 ---------------------------------------------------------------------
    1          6             0       -0.078878    0.558403    0.046956
    2          1             0       -0.124076    1.282903   -0.764825
    3          1             0       -0.126715    1.113439    0.989880
    4          8             0       -1.240837   -0.257114   -0.108354
    5          1             0       -1.255252   -0.904292    0.605318
    6          6             0        1.213184   -0.242049   -0.021848
    7          1             0        2.079523    0.421089    0.009454
    8          1             0        1.292880   -0.932699    0.820314
    9          1             0        1.254499   -0.821652   -0.943961
 ---------------------------------------------------------------------
 Rotational constants (GHZ):     34.4260771      9.1684975      8.0976034
 Standard basis: TZVP (5D, 7F)
 There are    93 symmetry adapted basis functions of A   symmetry.
 Integral buffers will be    131072 words long.
 Raffenetti 2 integral format.
 Two-electron integral symmetry is turned on.
    93 basis functions,   153 primitive gaussians,    96 cartesian basis functions
    13 alpha electrons       13 beta electrons
       nuclear repulsion energy        81.5769672335 Hartrees.
 NAtoms=    9 NActive=    9 NUniq=    9 SFac= 7.50D-01 NAtFMM=   80 NAOKFM=F Big=F
 One-electron integrals computed using PRISM.
 NBasis=    93 RedAO= T  NBF=    93
 NBsUse=    93 1.00D-06 NBFU=    93
 Initial guess read from the read-write file:
 Initial guess orbital symmetries:
       Occupied  (A) (A) (A) (A) (A) (A) (A) (A) (A) (A) (A) (A)
                 (A)
       Virtual   (A) (A) (A) (A) (A) (A) (A) (A) (A) (A) (A) (A)
                 (A) (A) (A) (A) (A) (A) (A) (A) (A) (A) (A) (A)
                 (A) (A) (A) (A) (A) (A) (A) (A) (A) (A) (A) (A)
                 (A) (A) (A) (A) (A) (A) (A) (A) (A) (A) (A) (A)
                 (A) (A) (A) (A) (A) (A) (A) (A) (A) (A) (A) (A)
                 (A) (A) (A) (A) (A) (A) (A) (A) (A) (A) (A) (A)
                 (A) (A) (A) (A) (A) (A) (A) (A)
 Harris functional with IExCor=  402 diagonalized for initial guess.
 ExpMin= 9.52D-02 ExpMax= 2.70D+04 ExpMxC= 9.22D+02 IAcc=3 IRadAn=         5 AccDes= 0.00D+00
 HarFok:  IExCor= 402 AccDes= 0.00D+00 IRadAn=         5 IDoV=1
 ScaDFX=  1.000000  1.000000  1.000000  1.000000
 Requested convergence on RMS density matrix=1.00D-08 within 128 cycles.
 Requested convergence on MAX density matrix=1.00D-06.
 Requested convergence on             energy=1.00D-06.
 No special actions if energy rises.
 Keep R1 integrals in memory in canonical form, NReq=    12835505.
 Integral accuracy reduced to 1.0D-05 until final iterations.
 Initial convergence to 1.0D-05 achieved.  Increase integral accuracy.
 SCF Done:  E(RB+HF-LYP) =  -155.104102784     A.U. after   10 cycles
             Convg  =    0.3124D-08             -V/T =  2.0048
             S**2   =   0.0000
 Range of M.O.s used for correlation:     1    93
 NBasis=    93 NAE=    13 NBE=    13 NFC=     0 NFV=     0
 NROrb=     93 NOA=    13 NOB=    13 NVA=    80 NVB=    80

 **** Warning!!: The largest alpha MO coefficient is  0.19369485D+02

 Symmetrizing basis deriv contribution to polar:
 IMax=3 JMax=2 DiffMx= 0.00D+00
 G2DrvN: will do   10 centers at a time, making    1 passes doing MaxLOS=2.
 FoFDir/FoFCou used for L=0 through L=2.
 DoAtom=TTTTTTTTT
          Differentiating once with respect to electric field.
                with respect to dipole field.
          Differentiating once with respect to nuclear coordinates.
          Store integrals in memory, NReq=    11662372.
          There are  30 degrees of freedom in the 1st order CPHF.
    27 vectors were produced by pass  0.
 AX will form  27 AO Fock derivatives at one time.
    27 vectors were produced by pass  1.
    27 vectors were produced by pass  2.
    27 vectors were produced by pass  3.
    27 vectors were produced by pass  4.
    13 vectors were produced by pass  5.
     3 vectors were produced by pass  6.
 Inv2:  IOpt= 1 Iter= 1 AM= 1.76D-15 Conv= 1.00D-12.
 Inverted reduced A of dimension  151 with in-core refinement.
 Isotropic polarizability for W=    0.000000       30.36 Bohr**3.
 End of Minotr Frequency-dependent properties file   721 does not exist.
 ***** Axes restored to original set *****
 -------------------------------------------------------------------
 Center     Atomic                   Forces (Hartrees/Bohr)
 Number     Number              X              Y              Z
 -------------------------------------------------------------------
    1          6          -0.001451070    0.000038651   -0.002116282
    2          1          -0.000063931   -0.000121847    0.001022323
    3          1           0.001721376    0.000201055    0.000406301
    4          8          -0.000132086   -0.000781959    0.000404494
    5          1          -0.000029607    0.000009369   -0.000111258
    6          6           0.000556970   -0.000801660    0.001085854
    7          1           0.000475006    0.001081810    0.000109942
    8          1          -0.000147794    0.000196458   -0.001161378
    9          1          -0.000928863    0.000178124    0.000360005
 -------------------------------------------------------------------
 Cartesian Forces:  Max     0.002116282 RMS     0.000807320

 GradGradGradGradGradGradGradGradGradGradGradGradGradGradGradGradGradGrad
 Berny optimization.
 Internal  Forces:  Max     0.001521858 RMS     0.000542964
 Search for a local minimum.
 Step number   2 out of a maximum of  43
 All quantities printed in internal units (Hartrees-Bohrs-Radians)
 Second derivative matrix not updated -- analytic derivatives used.
 Trust test= 1.02D+00 RLast= 1.90D-01 DXMaxT set to 4.24D-01
     Eigenvalues ---    0.00279   0.00321   0.04394   0.04418   0.04921
     Eigenvalues ---    0.05991   0.10024   0.12014   0.12365   0.12947
     Eigenvalues ---    0.16043   0.16985   0.24277   0.28890   0.31659
     Eigenvalues ---    0.33234   0.33535   0.33841   0.34506   0.36985
     Eigenvalues ---    0.521111000.000001000.000001000.000001000.00000
     Eigenvalues --- 1000.000001000.000001000.000001000.000001000.00000
     Eigenvalues --- 1000.000001000.000001000.00000
 RFO step:  Lambda=-6.01035266D-05.
 Quintic linear search produced a step of  0.07864.
 Iteration  1 RMS(Cart)=  0.01982433 RMS(Int)=  0.00024299
 Iteration  2 RMS(Cart)=  0.00024426 RMS(Int)=  0.00004910
 Iteration  3 RMS(Cart)=  0.00000003 RMS(Int)=  0.00004910
 Variable       Old X    -DE/DX   Delta X   Delta X   Delta X     New X
                                 (Linear)    (Quad)   (Total)
    R1        2.05792   0.00103   0.00282   0.00054   0.00336   2.06128
    R2        2.06962   0.00152   0.00374   0.00086   0.00461   2.07423
    R3        2.69863   0.00063  -0.00029   0.00033   0.00005   2.69868
    R4        2.87517   0.00044  -0.00275   0.00228  -0.00048   2.87469
    R5        1.82079   0.00011   0.00052  -0.00018   0.00035   1.82114
    R6        2.06255   0.00113   0.00319  -0.00004   0.00315   2.06570
    R7        2.06369   0.00117   0.00328   0.00038   0.00366   2.06734
    R8        2.05966   0.00099   0.00296  -0.00024   0.00272   2.06238
    A1        1.87844  -0.00021  -0.00253  -0.00353  -0.00608   1.87236
    A2        1.83909  -0.00039  -0.00563   0.00244  -0.00319   1.83590
    A3        1.93002  -0.00031   0.00152  -0.00493  -0.00334   1.92667
    A4        1.92571  -0.00004   0.00119   0.00324   0.00426   1.92997
    A5        1.92053   0.00006   0.00078   0.00190   0.00256   1.92309
    A6        1.96668   0.00083   0.00441   0.00062   0.00494   1.97162
    A7        1.89146   0.00001  -0.00155   0.00152  -0.00003   1.89143
    A8        1.93170   0.00029   0.00166  -0.00101   0.00063   1.93233
    A9        1.93888   0.00018   0.00222  -0.00100   0.00120   1.94008
   A10        1.92860   0.00009   0.00141   0.00188   0.00327   1.93188
   A11        1.87990  -0.00027  -0.00242  -0.00060  -0.00304   1.87686
   A12        1.89365  -0.00017  -0.00134   0.00093  -0.00043   1.89322
   A13        1.88952  -0.00015  -0.00166  -0.00020  -0.00189   1.88763
    D1       -3.11799   0.00009   0.00187  -0.01252  -0.01073  -3.12872
    D2       -1.09515  -0.00039  -0.00376  -0.01376  -0.01753  -1.11268
    D3        1.05915   0.00025   0.00096  -0.00842  -0.00737   1.05179
    D4        0.99892   0.00005   0.00236   0.04083   0.04319   1.04210
    D5        3.08646   0.00002   0.00182   0.03876   0.04057   3.12703
    D6       -1.09914   0.00002   0.00208   0.03910   0.04116  -1.05798
    D7       -1.07398   0.00047   0.00405   0.04707   0.05116  -1.02281
    D8        1.01357   0.00044   0.00352   0.04500   0.04855   1.06212
    D9        3.11115   0.00044   0.00377   0.04534   0.04914  -3.12290
   D10        3.05204  -0.00011  -0.00088   0.04101   0.04010   3.09214
   D11       -1.14360  -0.00014  -0.00142   0.03893   0.03748  -1.10612
   D12        0.95398  -0.00015  -0.00117   0.03927   0.03808   0.99205
         Item               Value     Threshold  Converged?
 Maximum Force            0.001522     0.000015     NO 
 RMS     Force            0.000543     0.000010     NO 
 Maximum Displacement     0.047487     0.000060     NO 
 RMS     Displacement     0.019830     0.000040     NO 
 Predicted change in Energy=-4.396261D-05
 GradGradGradGradGradGradGradGradGradGradGradGradGradGradGradGradGradGrad

                          Input orientation:                          
 ---------------------------------------------------------------------
 Center     Atomic     Atomic              Coordinates (Angstroms)
 Number     Number      Type              X           Y           Z
 ---------------------------------------------------------------------
    1          6             0       -0.017545    0.001641   -0.025913
    2          1             0       -0.035631   -0.048214    1.063581
    3          1             0        1.035818    0.015369   -0.334202
    4          8             0       -0.653774   -1.198744   -0.466019
    5          1             0       -0.652353   -1.207524   -1.429683
    6          6             0       -0.722786    1.259306   -0.510710
    7          1             0       -0.235978    2.153418   -0.112597
    8          1             0       -0.699157    1.329437   -1.602196
    9          1             0       -1.766652    1.263069   -0.192261
 ---------------------------------------------------------------------
                    Distance matrix (angstroms):
                    1          2          3          4          5
     1  C    0.000000
     2  H    1.090784   0.000000
     3  H    1.097636   1.762340   0.000000
     4  O    1.428077   2.011341   2.084747   0.000000
     5  H    1.958477   2.817926   2.354882   0.963705   0.000000
     6  C    1.521221   2.158746   2.161302   2.459425   2.633386
     7  H    2.164572   2.504140   2.497565   3.396535   3.633733
     8  H    2.170784   3.073199   2.518873   2.772122   2.543251
     9  H    2.162925   2.508592   3.070952   2.715504   2.979381
                    6          7          8          9
     6  C    0.000000
     7  H    1.093121   0.000000
     8  H    1.093991   1.764195   0.000000
     9  H    1.091366   1.772578   1.769709   0.000000
 Stoichiometry    C2H6O
 Framework group  C1[X(C2H6O)]
 Deg. of freedom    21
 Full point group                 C1
 Largest Abelian subgroup         C1      NOp   1
 Largest concise Abelian subgroup C1      NOp   1
                         Standard orientation:                         
 ---------------------------------------------------------------------
 Center     Atomic     Atomic              Coordinates (Angstroms)
 Number     Number      Type              X           Y           Z
 ---------------------------------------------------------------------
    1          6             0       -0.079029    0.556167    0.046966
    2          1             0       -0.124204    1.278329   -0.769276
    3          1             0       -0.125306    1.122379    0.986151
    4          8             0       -1.243360   -0.256199   -0.107305
    5          1             0       -1.255382   -0.907732    0.602687
    6          6             0        1.214538   -0.241360   -0.021948
    7          1             0        2.081304    0.420805    0.049935
    8          1             0        1.279640   -0.960004    0.800323
    9          1             0        1.277779   -0.793031   -0.961490
 ---------------------------------------------------------------------
 Rotational constants (GHZ):     34.4842487      9.1407271      8.0783654
 Standard basis: TZVP (5D, 7F)
 There are    93 symmetry adapted basis functions of A   symmetry.
 Integral buffers will be    131072 words long.
 Raffenetti 2 integral format.
 Two-electron integral symmetry is turned on.
    93 basis functions,   153 primitive gaussians,    96 cartesian basis functions
    13 alpha electrons       13 beta electrons
       nuclear repulsion energy        81.5122569167 Hartrees.
 NAtoms=    9 NActive=    9 NUniq=    9 SFac= 7.50D-01 NAtFMM=   80 NAOKFM=F Big=F
 One-electron integrals computed using PRISM.
 NBasis=    93 RedAO= T  NBF=    93
 NBsUse=    93 1.00D-06 NBFU=    93
 Initial guess read from the read-write file:
 Initial guess orbital symmetries:
       Occupied  (A) (A) (A) (A) (A) (A) (A) (A) (A) (A) (A) (A)
                 (A)
       Virtual   (A) (A) (A) (A) (A) (A) (A) (A) (A) (A) (A) (A)
                 (A) (A) (A) (A) (A) (A) (A) (A) (A) (A) (A) (A)
                 (A) (A) (A) (A) (A) (A) (A) (A) (A) (A) (A) (A)
                 (A) (A) (A) (A) (A) (A) (A) (A) (A) (A) (A) (A)
                 (A) (A) (A) (A) (A) (A) (A) (A) (A) (A) (A) (A)
                 (A) (A) (A) (A) (A) (A) (A) (A) (A) (A) (A) (A)
                 (A) (A) (A) (A) (A) (A) (A) (A)
 Harris functional with IExCor=  402 diagonalized for initial guess.
 ExpMin= 9.52D-02 ExpMax= 2.70D+04 ExpMxC= 9.22D+02 IAcc=3 IRadAn=         5 AccDes= 0.00D+00
 HarFok:  IExCor= 402 AccDes= 0.00D+00 IRadAn=         5 IDoV=1
 ScaDFX=  1.000000  1.000000  1.000000  1.000000
 Requested convergence on RMS density matrix=1.00D-08 within 128 cycles.
 Requested convergence on MAX density matrix=1.00D-06.
 Requested convergence on             energy=1.00D-06.
 No special actions if energy rises.
 Keep R1 integrals in memory in canonical form, NReq=    12835505.
 Integral accuracy reduced to 1.0D-05 until final iterations.
 Initial convergence to 1.0D-05 achieved.  Increase integral accuracy.
 SCF Done:  E(RB+HF-LYP) =  -155.104146803     A.U. after   10 cycles
             Convg  =    0.6892D-09             -V/T =  2.0049
             S**2   =   0.0000
 Range of M.O.s used for correlation:     1    93
 NBasis=    93 NAE=    13 NBE=    13 NFC=     0 NFV=     0
 NROrb=     93 NOA=    13 NOB=    13 NVA=    80 NVB=    80

 **** Warning!!: The largest alpha MO coefficient is  0.19092848D+02

 Symmetrizing basis deriv contribution to polar:
 IMax=3 JMax=2 DiffMx= 0.00D+00
 G2DrvN: will do   10 centers at a time, making    1 passes doing MaxLOS=2.
 FoFDir/FoFCou used for L=0 through L=2.
 DoAtom=TTTTTTTTT
          Differentiating once with respect to electric field.
                with respect to dipole field.
          Differentiating once with respect to nuclear coordinates.
          Store integrals in memory, NReq=    11662372.
          There are  30 degrees of freedom in the 1st order CPHF.
    27 vectors were produced by pass  0.
 AX will form  27 AO Fock derivatives at one time.
    27 vectors were produced by pass  1.
    27 vectors were produced by pass  2.
    27 vectors were produced by pass  3.
    27 vectors were produced by pass  4.
    13 vectors were produced by pass  5.
     3 vectors were produced by pass  6.
 Inv2:  IOpt= 1 Iter= 1 AM= 2.67D-15 Conv= 1.00D-12.
 Inverted reduced A of dimension  151 with in-core refinement.
 Isotropic polarizability for W=    0.000000       30.43 Bohr**3.
 End of Minotr Frequency-dependent properties file   721 does not exist.
 ***** Axes restored to original set *****
 -------------------------------------------------------------------
 Center     Atomic                   Forces (Hartrees/Bohr)
 Number     Number              X              Y              Z
 -------------------------------------------------------------------
    1          6          -0.000036246   -0.000089081    0.000039898
    2          1           0.000014881    0.000046424    0.000052336
    3          1           0.000068903   -0.000013762   -0.000040776
    4          8          -0.000010150   -0.000043843   -0.000037323
    5          1          -0.000000499   -0.000012423   -0.000001828
    6          6          -0.000011408    0.000067630    0.000008253
    7          1           0.000005157    0.000047135    0.000027037
    8          1           0.000010066    0.000004979   -0.000053269
    9          1          -0.000040704   -0.000007059    0.000005671
 -------------------------------------------------------------------
 Cartesian Forces:  Max     0.000089081 RMS     0.000037804

 GradGradGradGradGradGradGradGradGradGradGradGradGradGradGradGradGradGrad
 Berny optimization.
 Internal  Forces:  Max     0.000114238 RMS     0.000034698
 Search for a local minimum.
 Step number   3 out of a maximum of  43
 All quantities printed in internal units (Hartrees-Bohrs-Radians)
 Second derivative matrix not updated -- analytic derivatives used.
 Trust test= 1.00D+00 RLast= 1.33D-01 DXMaxT set to 4.24D-01
     Eigenvalues ---    0.00285   0.00322   0.04379   0.04405   0.04919
     Eigenvalues ---    0.05934   0.10056   0.12024   0.12328   0.12924
     Eigenvalues ---    0.16033   0.16952   0.24126   0.28850   0.31257
     Eigenvalues ---    0.32883   0.33188   0.33522   0.34208   0.36803
     Eigenvalues ---    0.520431000.000001000.000001000.000001000.00000
     Eigenvalues --- 1000.000001000.000001000.000001000.000001000.00000
     Eigenvalues --- 1000.000001000.000001000.00000
 RFO step:  Lambda=-2.92078601D-07.
 Quintic linear search produced a step of -0.02310.
 Iteration  1 RMS(Cart)=  0.00124383 RMS(Int)=  0.00000092
 Iteration  2 RMS(Cart)=  0.00000092 RMS(Int)=  0.00000022
 Variable       Old X    -DE/DX   Delta X   Delta X   Delta X     New X
                                 (Linear)    (Quad)   (Total)
    R1        2.06128   0.00005  -0.00008   0.00021   0.00013   2.06141
    R2        2.07423   0.00008  -0.00011   0.00033   0.00022   2.07445
    R3        2.69868   0.00006   0.00000   0.00010   0.00009   2.69877
    R4        2.87469   0.00011   0.00001   0.00043   0.00044   2.87513
    R5        1.82114   0.00000  -0.00001   0.00000   0.00000   1.82114
    R6        2.06570   0.00005  -0.00007   0.00021   0.00014   2.06583
    R7        2.06734   0.00005  -0.00008   0.00022   0.00014   2.06748
    R8        2.06238   0.00004  -0.00006   0.00019   0.00012   2.06251
    A1        1.87236   0.00001   0.00014  -0.00010   0.00004   1.87240
    A2        1.83590   0.00003   0.00007   0.00028   0.00036   1.83626
    A3        1.92667  -0.00004   0.00008  -0.00039  -0.00032   1.92636
    A4        1.92997  -0.00003  -0.00010  -0.00006  -0.00016   1.92981
    A5        1.92309   0.00000  -0.00006   0.00004  -0.00002   1.92307
    A6        1.97162   0.00003  -0.00011   0.00022   0.00011   1.97173
    A7        1.89143   0.00002   0.00000   0.00007   0.00007   1.89150
    A8        1.93233   0.00002  -0.00001   0.00010   0.00008   1.93241
    A9        1.94008  -0.00001  -0.00003   0.00011   0.00008   1.94016
   A10        1.93188  -0.00001  -0.00008  -0.00018  -0.00026   1.93162
   A11        1.87686   0.00000   0.00007   0.00005   0.00012   1.87698
   A12        1.89322  -0.00001   0.00001  -0.00007  -0.00006   1.89316
   A13        1.88763   0.00000   0.00004   0.00000   0.00004   1.88767
    D1       -3.12872  -0.00001   0.00025   0.00093   0.00117  -3.12755
    D2       -1.11268   0.00001   0.00041   0.00093   0.00133  -1.11134
    D3        1.05179   0.00001   0.00017   0.00110   0.00127   1.05305
    D4        1.04210  -0.00002  -0.00100  -0.00195  -0.00295   1.03915
    D5        3.12703  -0.00002  -0.00094  -0.00176  -0.00270   3.12434
    D6       -1.05798  -0.00002  -0.00095  -0.00181  -0.00276  -1.06074
    D7       -1.02281  -0.00001  -0.00118  -0.00161  -0.00279  -1.02560
    D8        1.06212   0.00000  -0.00112  -0.00141  -0.00253   1.05958
    D9       -3.12290  -0.00001  -0.00114  -0.00146  -0.00260  -3.12550
   D10        3.09214   0.00000  -0.00093  -0.00172  -0.00264   3.08949
   D11       -1.10612   0.00001  -0.00087  -0.00152  -0.00239  -1.10851
   D12        0.99205   0.00000  -0.00088  -0.00158  -0.00246   0.98960
         Item               Value     Threshold  Converged?
 Maximum Force            0.000114     0.000015     NO 
 RMS     Force            0.000035     0.000010     NO 
 Maximum Displacement     0.002894     0.000060     NO 
 RMS     Displacement     0.001244     0.000040     NO 
 Predicted change in Energy=-1.694701D-07
 GradGradGradGradGradGradGradGradGradGradGradGradGradGradGradGradGradGrad

                          Input orientation:                          
 ---------------------------------------------------------------------
 Center     Atomic     Atomic              Coordinates (Angstroms)
 Number     Number      Type              X           Y           Z
 ---------------------------------------------------------------------
    1          6             0       -0.017474    0.001569   -0.026118
    2          1             0       -0.034665   -0.047578    1.063490
    3          1             0        1.035737    0.014807   -0.335367
    4          8             0       -0.654369   -1.198821   -0.465413
    5          1             0       -0.652680   -1.208488   -1.429066
    6          6             0       -0.722743    1.259562   -0.510752
    7          1             0       -0.236975    2.153625   -0.111066
    8          1             0       -0.697845    1.330742   -1.602216
    9          1             0       -1.767044    1.262341   -0.193494
 ---------------------------------------------------------------------
                    Distance matrix (angstroms):
                    1          2          3          4          5
     1  C    0.000000
     2  H    1.090852   0.000000
     3  H    1.097754   1.762513   0.000000
     4  O    1.428128   2.011700   2.084769   0.000000
     5  H    1.958567   2.818243   2.354438   0.963704   0.000000
     6  C    1.521454   2.158774   2.161580   2.459751   2.634289
     7  H    2.164889   2.503160   2.498930   3.396862   3.635071
     8  H    2.171103   3.073363   2.518312   2.773607   2.545527
     9  H    2.162997   2.509389   3.071164   2.714646   2.978832
                    6          7          8          9
     6  C    0.000000
     7  H    1.093192   0.000000
     8  H    1.094066   1.764389   0.000000
     9  H    1.091432   1.772651   1.769848   0.000000
 Stoichiometry    C2H6O
 Framework group  C1[X(C2H6O)]
 Deg. of freedom    21
 Full point group                 C1
 Largest Abelian subgroup         C1      NOp   1
 Largest concise Abelian subgroup C1      NOp   1
                         Standard orientation:                         
 ---------------------------------------------------------------------
 Center     Atomic     Atomic              Coordinates (Angstroms)
 Number     Number      Type              X           Y           Z
 ---------------------------------------------------------------------
    1          6             0       -0.079098    0.556136    0.046968
    2          1             0       -0.123835    1.278484   -0.769224
    3          1             0       -0.125563    1.122235    0.986349
    4          8             0       -1.243464   -0.256245   -0.107428
    5          1             0       -1.256195   -0.907104    0.603167
    6          6             0        1.214754   -0.241376   -0.021888
    7          1             0        2.081576    0.421111    0.047405
    8          1             0        1.281054   -0.958450    0.801755
    9          1             0        1.276739   -0.794879   -0.960512
 ---------------------------------------------------------------------
 Rotational constants (GHZ):     34.4828704      9.1380595      8.0765586
 Standard basis: TZVP (5D, 7F)
 There are    93 symmetry adapted basis functions of A   symmetry.
 Integral buffers will be    131072 words long.
 Raffenetti 2 integral format.
 Two-electron integral symmetry is turned on.
    93 basis functions,   153 primitive gaussians,    96 cartesian basis functions
    13 alpha electrons       13 beta electrons
       nuclear repulsion energy        81.5049225771 Hartrees.
 NAtoms=    9 NActive=    9 NUniq=    9 SFac= 7.50D-01 NAtFMM=   80 NAOKFM=F Big=F
 One-electron integrals computed using PRISM.
 NBasis=    93 RedAO= T  NBF=    93
 NBsUse=    93 1.00D-06 NBFU=    93
 Initial guess read from the read-write file:
 Initial guess orbital symmetries:
       Occupied  (A) (A) (A) (A) (A) (A) (A) (A) (A) (A) (A) (A)
                 (A)
       Virtual   (A) (A) (A) (A) (A) (A) (A) (A) (A) (A) (A) (A)
                 (A) (A) (A) (A) (A) (A) (A) (A) (A) (A) (A) (A)
                 (A) (A) (A) (A) (A) (A) (A) (A) (A) (A) (A) (A)
                 (A) (A) (A) (A) (A) (A) (A) (A) (A) (A) (A) (A)
                 (A) (A) (A) (A) (A) (A) (A) (A) (A) (A) (A) (A)
                 (A) (A) (A) (A) (A) (A) (A) (A) (A) (A) (A) (A)
                 (A) (A) (A) (A) (A) (A) (A) (A)
 Requested convergence on RMS density matrix=1.00D-08 within 128 cycles.
 Requested convergence on MAX density matrix=1.00D-06.
 Requested convergence on             energy=1.00D-06.
 No special actions if energy rises.
 Keep R1 integrals in memory in canonical form, NReq=    12835505.
 SCF Done:  E(RB+HF-LYP) =  -155.104146972     A.U. after    7 cycles
             Convg  =    0.1751D-08             -V/T =  2.0049
             S**2   =   0.0000
 Range of M.O.s used for correlation:     1    93
 NBasis=    93 NAE=    13 NBE=    13 NFC=     0 NFV=     0
 NROrb=     93 NOA=    13 NOB=    13 NVA=    80 NVB=    80

 **** Warning!!: The largest alpha MO coefficient is  0.19081840D+02

 Symmetrizing basis deriv contribution to polar:
 IMax=3 JMax=2 DiffMx= 0.00D+00
 G2DrvN: will do   10 centers at a time, making    1 passes doing MaxLOS=2.
 FoFDir/FoFCou used for L=0 through L=2.
 DoAtom=TTTTTTTTT
          Differentiating once with respect to electric field.
                with respect to dipole field.
          Differentiating once with respect to nuclear coordinates.
          Store integrals in memory, NReq=    11662372.
          There are  30 degrees of freedom in the 1st order CPHF.
    27 vectors were produced by pass  0.
 AX will form  27 AO Fock derivatives at one time.
    27 vectors were produced by pass  1.
    27 vectors were produced by pass  2.
    27 vectors were produced by pass  3.
    27 vectors were produced by pass  4.
    13 vectors were produced by pass  5.
     3 vectors were produced by pass  6.
 Inv2:  IOpt= 1 Iter= 1 AM= 1.62D-15 Conv= 1.00D-12.
 Inverted reduced A of dimension  151 with in-core refinement.
 Isotropic polarizability for W=    0.000000       30.44 Bohr**3.
 End of Minotr Frequency-dependent properties file   721 does not exist.
 ***** Axes restored to original set *****
 -------------------------------------------------------------------
 Center     Atomic                   Forces (Hartrees/Bohr)
 Number     Number              X              Y              Z
 -------------------------------------------------------------------
    1          6           0.000000040    0.000000240    0.000000195
    2          1          -0.000000038    0.000000018   -0.000000126
    3          1          -0.000000183    0.000000136   -0.000000199
    4          8          -0.000000021    0.000000282   -0.000000175
    5          1          -0.000000119    0.000000100   -0.000000066
    6          6           0.000000086   -0.000000439   -0.000000018
    7          1           0.000000202   -0.000000206    0.000000129
    8          1           0.000000010   -0.000000081    0.000000136
    9          1           0.000000025   -0.000000051    0.000000124
 -------------------------------------------------------------------
 Cartesian Forces:  Max     0.000000439 RMS     0.000000160

 GradGradGradGradGradGradGradGradGradGradGradGradGradGradGradGradGradGrad
 Berny optimization.
 Internal  Forces:  Max     0.000000857 RMS     0.000000206
 Search for a local minimum.
 Step number   4 out of a maximum of  43
 All quantities printed in internal units (Hartrees-Bohrs-Radians)
 Second derivative matrix not updated -- analytic derivatives used.
 Trust test= 9.98D-01 RLast= 8.29D-03 DXMaxT set to 4.24D-01
     Eigenvalues ---    0.00284   0.00322   0.04379   0.04404   0.04918
     Eigenvalues ---    0.05932   0.10055   0.12021   0.12325   0.12920
     Eigenvalues ---    0.16029   0.16951   0.24117   0.28819   0.31237
     Eigenvalues ---    0.32870   0.33175   0.33509   0.34195   0.36787
     Eigenvalues ---    0.520441000.000001000.000001000.000001000.00000
     Eigenvalues --- 1000.000001000.000001000.000001000.000001000.00000
     Eigenvalues --- 1000.000001000.000001000.00000
 RFO step:  Lambda= 0.00000000D+00.
 Quintic linear search produced a step of -0.00270.
 Iteration  1 RMS(Cart)=  0.00000441 RMS(Int)=  0.00000000
 Iteration  2 RMS(Cart)=  0.00000000 RMS(Int)=  0.00000000
 Variable       Old X    -DE/DX   Delta X   Delta X   Delta X     New X
                                 (Linear)    (Quad)   (Total)
    R1        2.06141   0.00000   0.00000   0.00000   0.00000   2.06141
    R2        2.07445   0.00000   0.00000   0.00000   0.00000   2.07445
    R3        2.69877   0.00000   0.00000   0.00000   0.00000   2.69877
    R4        2.87513   0.00000   0.00000   0.00000   0.00000   2.87513
    R5        1.82114   0.00000   0.00000   0.00000   0.00000   1.82114
    R6        2.06583   0.00000   0.00000   0.00000   0.00000   2.06583
    R7        2.06748   0.00000   0.00000   0.00000   0.00000   2.06748
    R8        2.06251   0.00000   0.00000   0.00000   0.00000   2.06251
    A1        1.87240   0.00000   0.00000   0.00000   0.00000   1.87240
    A2        1.83626   0.00000   0.00000   0.00000   0.00000   1.83626
    A3        1.92636   0.00000   0.00000   0.00000   0.00000   1.92636
    A4        1.92981   0.00000   0.00000   0.00000   0.00000   1.92981
    A5        1.92307   0.00000   0.00000   0.00000   0.00000   1.92307
    A6        1.97173   0.00000   0.00000   0.00000   0.00000   1.97173
    A7        1.89150   0.00000   0.00000   0.00000   0.00000   1.89150
    A8        1.93241   0.00000   0.00000   0.00000   0.00000   1.93241
    A9        1.94016   0.00000   0.00000   0.00000   0.00000   1.94016
   A10        1.93162   0.00000   0.00000   0.00000   0.00000   1.93162
   A11        1.87698   0.00000   0.00000   0.00000   0.00000   1.87698
   A12        1.89316   0.00000   0.00000   0.00000   0.00000   1.89316
   A13        1.88767   0.00000   0.00000   0.00000   0.00000   1.88767
    D1       -3.12755   0.00000   0.00000  -0.00001  -0.00001  -3.12756
    D2       -1.11134   0.00000   0.00000  -0.00001  -0.00001  -1.11135
    D3        1.05305   0.00000   0.00000  -0.00001  -0.00001   1.05304
    D4        1.03915   0.00000   0.00001   0.00000   0.00001   1.03916
    D5        3.12434   0.00000   0.00001   0.00000   0.00000   3.12434
    D6       -1.06074   0.00000   0.00001   0.00000   0.00001  -1.06074
    D7       -1.02560   0.00000   0.00001   0.00000   0.00000  -1.02560
    D8        1.05958   0.00000   0.00001   0.00000   0.00000   1.05958
    D9       -3.12550   0.00000   0.00001   0.00000   0.00000  -3.12549
   D10        3.08949   0.00000   0.00001   0.00000   0.00001   3.08950
   D11       -1.10851   0.00000   0.00001   0.00000   0.00001  -1.10850
   D12        0.98960   0.00000   0.00001   0.00000   0.00001   0.98960
         Item               Value     Threshold  Converged?
 Maximum Force            0.000001     0.000015     YES
 RMS     Force            0.000000     0.000010     YES
 Maximum Displacement     0.000014     0.000060     YES
 RMS     Displacement     0.000004     0.000040     YES
 Predicted change in Energy=-3.897659D-12
 Optimization completed.
    -- Stationary point found.
                           ----------------------------
                           !   Optimized Parameters   !
                           ! (Angstroms and Degrees)  !
 --------------------------                            --------------------------
 ! Name  Definition              Value          Derivative Info.                !
 --------------------------------------------------------------------------------
 ! R1    R(1,2)                  1.0909         -DE/DX =    0.0                 !
 ! R2    R(1,3)                  1.0978         -DE/DX =    0.0                 !
 ! R3    R(1,4)                  1.4281         -DE/DX =    0.0                 !
 ! R4    R(1,6)                  1.5215         -DE/DX =    0.0                 !
 ! R5    R(4,5)                  0.9637         -DE/DX =    0.0                 !
 ! R6    R(6,7)                  1.0932         -DE/DX =    0.0                 !
 ! R7    R(6,8)                  1.0941         -DE/DX =    0.0                 !
 ! R8    R(6,9)                  1.0914         -DE/DX =    0.0                 !
 ! A1    A(2,1,3)              107.2806         -DE/DX =    0.0                 !
 ! A2    A(2,1,4)              105.2098         -DE/DX =    0.0                 !
 ! A3    A(2,1,6)              110.3722         -DE/DX =    0.0                 !
 ! A4    A(3,1,4)              110.5699         -DE/DX =    0.0                 !
 ! A5    A(3,1,6)              110.1839         -DE/DX =    0.0                 !
 ! A6    A(4,1,6)              112.9717         -DE/DX =    0.0                 !
 ! A7    A(1,4,5)              108.375          -DE/DX =    0.0                 !
 ! A8    A(1,6,7)              110.7189         -DE/DX =    0.0                 !
 ! A9    A(1,6,8)              111.1629         -DE/DX =    0.0                 !
 ! A10   A(1,6,9)              110.6737         -DE/DX =    0.0                 !
 ! A11   A(7,6,8)              107.5431         -DE/DX =    0.0                 !
 ! A12   A(7,6,9)              108.4701         -DE/DX =    0.0                 !
 ! A13   A(8,6,9)              108.1556         -DE/DX =    0.0                 !
 ! D1    D(2,1,4,5)           -179.1954         -DE/DX =    0.0                 !
 ! D2    D(3,1,4,5)            -63.6753         -DE/DX =    0.0                 !
 ! D3    D(6,1,4,5)             60.3355         -DE/DX =    0.0                 !
 ! D4    D(2,1,6,7)             59.5391         -DE/DX =    0.0                 !
 ! D5    D(2,1,6,8)            179.0113         -DE/DX =    0.0                 !
 ! D6    D(2,1,6,9)            -60.7761         -DE/DX =    0.0                 !
 ! D7    D(3,1,6,7)            -58.7626         -DE/DX =    0.0                 !
 ! D8    D(3,1,6,8)             60.7096         -DE/DX =    0.0                 !
 ! D9    D(3,1,6,9)           -179.0778         -DE/DX =    0.0                 !
 ! D10   D(4,1,6,7)            177.0149         -DE/DX =    0.0                 !
 ! D11   D(4,1,6,8)            -63.5129         -DE/DX =    0.0                 !
 ! D12   D(4,1,6,9)             56.6997         -DE/DX =    0.0                 !
 --------------------------------------------------------------------------------
 GradGradGradGradGradGradGradGradGradGradGradGradGradGradGradGradGradGrad

                          Input orientation:                          
 ---------------------------------------------------------------------
 Center     Atomic     Atomic              Coordinates (Angstroms)
 Number     Number      Type              X           Y           Z
 ---------------------------------------------------------------------
    1          6             0       -0.017474    0.001569   -0.026118
    2          1             0       -0.034665   -0.047578    1.063490
    3          1             0        1.035737    0.014807   -0.335367
    4          8             0       -0.654369   -1.198821   -0.465413
    5          1             0       -0.652680   -1.208488   -1.429066
    6          6             0       -0.722743    1.259562   -0.510752
    7          1             0       -0.236975    2.153625   -0.111066
    8          1             0       -0.697845    1.330742   -1.602216
    9          1             0       -1.767044    1.262341   -0.193494
 ---------------------------------------------------------------------
                    Distance matrix (angstroms):
                    1          2          3          4          5
     1  C    0.000000
     2  H    1.090852   0.000000
     3  H    1.097754   1.762513   0.000000
     4  O    1.428128   2.011700   2.084769   0.000000
     5  H    1.958567   2.818243   2.354438   0.963704   0.000000
     6  C    1.521454   2.158774   2.161580   2.459751   2.634289
     7  H    2.164889   2.503160   2.498930   3.396862   3.635071
     8  H    2.171103   3.073363   2.518312   2.773607   2.545527
     9  H    2.162997   2.509389   3.071164   2.714646   2.978832
                    6          7          8          9
     6  C    0.000000
     7  H    1.093192   0.000000
     8  H    1.094066   1.764389   0.000000
     9  H    1.091432   1.772651   1.769848   0.000000
 Stoichiometry    C2H6O
 Framework group  C1[X(C2H6O)]
 Deg. of freedom    21
 Full point group                 C1
 Largest Abelian subgroup         C1      NOp   1
 Largest concise Abelian subgroup C1      NOp   1
                         Standard orientation:                         
 ---------------------------------------------------------------------
 Center     Atomic     Atomic              Coordinates (Angstroms)
 Number     Number      Type              X           Y           Z
 ---------------------------------------------------------------------
    1          6             0       -0.079098    0.556136    0.046968
    2          1             0       -0.123835    1.278484   -0.769224
    3          1             0       -0.125563    1.122235    0.986349
    4          8             0       -1.243464   -0.256245   -0.107428
    5          1             0       -1.256195   -0.907104    0.603167
    6          6             0        1.214754   -0.241376   -0.021888
    7          1             0        2.081576    0.421111    0.047405
    8          1             0        1.281054   -0.958450    0.801755
    9          1             0        1.276739   -0.794879   -0.960512
 ---------------------------------------------------------------------
 Rotational constants (GHZ):     34.4828704      9.1380595      8.0765586

 **********************************************************************

            Population analysis using the SCF density.

 **********************************************************************

 Orbital symmetries:
       Occupied  (A) (A) (A) (A) (A) (A) (A) (A) (A) (A) (A) (A)
                 (A)
       Virtual   (A) (A) (A) (A) (A) (A) (A) (A) (A) (A) (A) (A)
                 (A) (A) (A) (A) (A) (A) (A) (A) (A) (A) (A) (A)
                 (A) (A) (A) (A) (A) (A) (A) (A) (A) (A) (A) (A)
                 (A) (A) (A) (A) (A) (A) (A) (A) (A) (A) (A) (A)
                 (A) (A) (A) (A) (A) (A) (A) (A) (A) (A) (A) (A)
                 (A) (A) (A) (A) (A) (A) (A) (A) (A) (A) (A) (A)
                 (A) (A) (A) (A) (A) (A) (A) (A)
 The electronic state is 1-A.
 Alpha  occ. eigenvalues --  -19.12360 -10.21915 -10.16739  -1.02114  -0.75294
 Alpha  occ. eigenvalues --   -0.62953  -0.50696  -0.45821  -0.43718  -0.38775
 Alpha  occ. eigenvalues --   -0.37656  -0.33151  -0.27889
 Alpha virt. eigenvalues --    0.02425   0.06255   0.08115   0.10022   0.10990
 Alpha virt. eigenvalues --    0.12631   0.14176   0.18348   0.19852   0.22920
 Alpha virt. eigenvalues --    0.27262   0.28260   0.31138   0.37686   0.39287
 Alpha virt. eigenvalues --    0.40586   0.42253   0.44619   0.45024   0.49490
 Alpha virt. eigenvalues --    0.50854   0.53832   0.54960   0.58108   0.59705
 Alpha virt. eigenvalues --    0.81753   1.12558   1.17786   1.25514   1.26281
 Alpha virt. eigenvalues --    1.29380   1.31526   1.33831   1.35257   1.39493
 Alpha virt. eigenvalues --    1.45259   1.48423   1.50946   1.53289   1.58748
 Alpha virt. eigenvalues --    1.63665   1.74398   1.77908   1.78669   1.82832
 Alpha virt. eigenvalues --    1.84966   1.87931   1.95463   2.02335   2.08891
 Alpha virt. eigenvalues --    2.17841   2.19118   2.25020   2.31551   2.35074
 Alpha virt. eigenvalues --    2.39514   2.51227   2.52023   2.55316   2.59687
 Alpha virt. eigenvalues --    2.61672   2.65927   2.68703   2.69041   2.86909
 Alpha virt. eigenvalues --    2.90791   2.96311   3.05611   3.09445   3.16189
 Alpha virt. eigenvalues --    3.17782   3.31811   3.32958   3.35934   3.38064
 Alpha virt. eigenvalues --    3.95125   4.30703  21.87229  22.01366  43.43134
          Condensed to atoms (all electrons):
              1          2          3          4          5          6
     1  C    4.882127   0.400247   0.391613   0.249671  -0.041998   0.290598
     2  H    0.400247   0.625021  -0.053042  -0.051523   0.012930  -0.049621
     3  H    0.391613  -0.053042   0.677214  -0.047548  -0.010765  -0.060135
     4  O    0.249671  -0.051523  -0.047548   7.981592   0.295501  -0.044933
     5  H   -0.041998   0.012930  -0.010765   0.295501   0.489474  -0.008649
     6  C    0.290598  -0.049621  -0.060135  -0.044933  -0.008649   5.073284
     7  H   -0.035357  -0.000850   0.005140   0.009170   0.000353   0.368342
     8  H   -0.034967   0.011061  -0.013553  -0.006363   0.008192   0.392825
     9  H   -0.040377  -0.011216   0.012020   0.004643  -0.002430   0.398247
              7          8          9
     1  C   -0.035357  -0.034967  -0.040377
     2  H   -0.000850   0.011061  -0.011216
     3  H    0.005140  -0.013553   0.012020
     4  O    0.009170  -0.006363   0.004643
     5  H    0.000353   0.008192  -0.002430
     6  C    0.368342   0.392825   0.398247
     7  H    0.595632  -0.028825  -0.023231
     8  H   -0.028825   0.605976  -0.036789
     9  H   -0.023231  -0.036789   0.572924
 Mulliken atomic charges:
              1
     1  C   -0.061557
     2  H    0.116994
     3  H    0.099057
     4  O   -0.390209
     5  H    0.257393
     6  C   -0.359957
     7  H    0.109627
     8  H    0.102443
     9  H    0.126209
 Sum of Mulliken charges=   0.00000
 Atomic charges with hydrogens summed into heavy atoms:
              1
     1  C    0.154493
     2  H    0.000000
     3  H    0.000000
     4  O   -0.132816
     5  H    0.000000
     6  C   -0.021677
     7  H    0.000000
     8  H    0.000000
     9  H    0.000000
 Sum of Mulliken charges=   0.00000
 APT atomic charges:
              1
     1  C    0.547783
     2  H   -0.037797
     3  H   -0.089305
     4  O   -0.614838
     5  H    0.239491
     6  C    0.011106
     7  H   -0.015771
     8  H   -0.028596
     9  H   -0.012073
 Sum of APT charges=   0.00000
 APT Atomic charges with hydrogens summed into heavy atoms:
              1
     1  C    0.420681
     2  H    0.000000
     3  H    0.000000
     4  O   -0.375347
     5  H    0.000000
     6  C   -0.045334
     7  H    0.000000
     8  H    0.000000
     9  H    0.000000
 Sum of APT charges=   0.00000
 Electronic spatial extent (au):  <R**2>=   196.2342
 Charge=     0.0000 electrons
 Dipole moment (field-independent basis, Debye):
    X=     1.3213    Y=    -0.1694    Z=     1.2270  Tot=     1.8111
 Quadrupole moment (field-independent basis, Debye-Ang):
   XX=   -22.7113   YY=   -18.8353   ZZ=   -19.4415
   XY=     1.0491   XZ=    -1.9024   YZ=    -1.4956
 Traceless Quadrupole moment (field-independent basis, Debye-Ang):
   XX=    -2.3819   YY=     1.4941   ZZ=     0.8879
   XY=     1.0491   XZ=    -1.9024   YZ=    -1.4956
 Octapole moment (field-independent basis, Debye-Ang**2):
  XXX=    -1.2114  YYY=    -2.0230  ZZZ=     0.4102  XYY=    -3.3528
  XXY=    -1.4098  XXZ=     2.4227  XZZ=    -2.3275  YZZ=    -0.8581
  YYZ=     0.9441  XYZ=     1.8214
 Hexadecapole moment (field-independent basis, Debye-Ang**3):
 XXXX=  -168.6934 YYYY=   -58.0305 ZZZZ=   -35.6520 XXXY=     7.2420
 XXXZ=    -3.4521 YYYX=     4.2720 YYYZ=    -2.5245 ZZZX=    -1.6347
 ZZZY=    -1.2025 XXYY=   -34.2926 XXZZ=   -32.9942 YYZZ=   -14.0070
 XXYZ=    -2.3340 YYXZ=    -1.4784 ZZXY=     0.4953
 N-N= 8.150492257714D+01 E-N=-5.255535938992D+02  KE= 1.543435541340D+02
  Exact polarizability:  32.046   0.541  30.472  -0.149  -0.678  28.796
 Approx polarizability:  38.816   1.974  39.340   0.484  -1.426  38.647
 Rotating derivatives to standard orientation.
 Full mass-weighted force constant matrix:
 Low frequencies ---   -6.8107   -5.2487    0.0005    0.0008    0.0011    1.8559
 Low frequencies ---  270.8424  300.6929  424.1215
 Diagonal vibrational polarizability:
       18.5312834      13.4962699      14.4255950
 Harmonic frequencies (cm**-1), IR intensities (KM/Mole), Raman scattering
 activities (A**4/AMU), depolarization ratios for plane and unpolarized
 incident light, reduced masses (AMU), force constants (mDyne/A),
 and normal coordinates:
                     1                      2                      3
                     A                      A                      A
 Frequencies --   270.8424               300.6929               424.1215
 Red. masses --     1.0864                 1.1121                 2.7149
 Frc consts  --     0.0470                 0.0592                 0.2877
 IR Inten    --     4.5339               124.1202                17.4487
 Atom AN      X      Y      Z        X      Y      Z        X      Y      Z
   1   6     0.00   0.00  -0.06     0.00   0.03  -0.04    -0.01   0.18   0.04
   2   1    -0.01  -0.06  -0.12    -0.01  -0.02  -0.09    -0.06   0.18   0.04
   3   1     0.02   0.08  -0.11     0.03   0.09  -0.08    -0.09   0.14   0.06
   4   8     0.00  -0.01   0.05     0.00   0.03   0.05     0.22  -0.11  -0.03
   5   1    -0.05   0.16   0.20     0.58  -0.58  -0.49     0.15   0.19   0.24
   6   6     0.00   0.00   0.00    -0.04  -0.02   0.02    -0.20  -0.03  -0.01
   7   1    -0.01  -0.04   0.57     0.00  -0.08   0.12     0.09  -0.41  -0.06
   8   1    -0.29  -0.34  -0.28    -0.15  -0.04   0.02    -0.46  -0.10  -0.05
   9   1     0.31   0.38  -0.20     0.02   0.00   0.02    -0.53  -0.06  -0.02
                     4                      5                      6
                     A                      A                      A
 Frequencies --   812.3628               882.7648              1057.9059
 Red. masses --     1.0845                 2.3439                 2.8667
 Frc consts  --     0.4217                 1.0762                 1.8903
 IR Inten    --     2.8231                13.4897                20.4118
 Atom AN      X      Y      Z        X      Y      Z        X      Y      Z
   1   6     0.00   0.01  -0.07     0.01  -0.17  -0.02     0.31  -0.06   0.02
   2   1    -0.22   0.37   0.27     0.17  -0.14  -0.01     0.17  -0.18  -0.07
   3   1     0.21  -0.41   0.20     0.21  -0.12  -0.02     0.38  -0.01  -0.03
   4   8     0.00  -0.01   0.01     0.15   0.08   0.02    -0.11  -0.08  -0.01
   5   1     0.07   0.07   0.08     0.01   0.05  -0.02    -0.37  -0.20  -0.12
   6   6     0.00   0.00  -0.04    -0.22   0.01  -0.01    -0.11   0.18  -0.01
   7   1     0.01  -0.03   0.18    -0.63   0.55   0.06     0.10  -0.11   0.04
   8   1    -0.33   0.25   0.21     0.13   0.13   0.06    -0.50   0.19   0.03
   9   1     0.33  -0.29   0.16     0.18   0.09  -0.03    -0.36   0.08   0.05
                     7                      8                      9
                     A                      A                      A
 Frequencies --  1069.2261              1137.0214              1280.8513
 Red. masses --     1.5809                 1.6971                 1.3113
 Frc consts  --     1.0649                 1.2927                 1.2675
 IR Inten    --   108.3296                 3.9050                11.7354
 Atom AN      X      Y      Z        X      Y      Z        X      Y      Z
   1   6     0.10   0.10  -0.05     0.03   0.15   0.12    -0.02  -0.05   0.10
   2   1     0.41   0.29   0.11    -0.13  -0.15  -0.13     0.53  -0.20  -0.06
   3   1     0.00  -0.16   0.09     0.31   0.46  -0.05    -0.40   0.12  -0.03
   4   8    -0.10  -0.07  -0.02    -0.02  -0.06  -0.03    -0.02   0.01  -0.02
   5   1     0.51   0.20   0.25    -0.28  -0.15  -0.11     0.40   0.19   0.16
   6   6    -0.05  -0.06   0.05    -0.02  -0.10  -0.09     0.01   0.04  -0.11
   7   1    -0.26   0.24  -0.08    -0.26   0.21   0.17     0.07  -0.08   0.20
   8   1     0.35  -0.09  -0.03     0.10   0.18   0.14    -0.24   0.21   0.07
   9   1     0.03   0.17  -0.08     0.48  -0.17   0.00     0.15  -0.26   0.08
                    10                     11                     12
                     A                      A                      A
 Frequencies --  1373.1248              1410.0959              1426.8844
 Red. masses --     1.1862                 1.2047                 1.2800
 Frc consts  --     1.3177                 1.4113                 1.5355
 IR Inten    --     2.2415                 7.7891                39.5326
 Atom AN      X      Y      Z        X      Y      Z        X      Y      Z
   1   6    -0.06  -0.04   0.05     0.05  -0.02   0.02    -0.11   0.03  -0.02
   2   1    -0.21  -0.19  -0.06    -0.44  -0.07   0.00     0.64   0.08  -0.03
   3   1     0.74   0.12   0.01    -0.19   0.06  -0.03     0.42  -0.05   0.06
   4   8    -0.02   0.01  -0.06    -0.01   0.02  -0.02     0.01  -0.02   0.02
   5   1     0.45   0.23   0.17     0.22   0.11   0.07    -0.21  -0.12  -0.08
   6   6     0.00   0.04   0.02     0.09  -0.07  -0.01     0.09  -0.02   0.00
   7   1     0.10  -0.09   0.03    -0.30   0.41   0.13    -0.14   0.28   0.01
   8   1     0.06  -0.09  -0.08    -0.34   0.12   0.18    -0.34  -0.01   0.03
   9   1    -0.09  -0.05   0.06    -0.46   0.12  -0.14    -0.31   0.00  -0.03
                    13                     14                     15
                     A                      A                      A
 Frequencies --  1490.8318              1495.1709              1520.3095
 Red. masses --     1.0444                 1.0442                 1.0868
 Frc consts  --     1.3676                 1.3753                 1.4800
 IR Inten    --     7.2811                 2.3195                 1.0738
 Atom AN      X      Y      Z        X      Y      Z        X      Y      Z
   1   6     0.00   0.01  -0.03     0.03  -0.02   0.00    -0.01  -0.08  -0.01
   2   1     0.02   0.07   0.02    -0.06   0.23   0.21     0.08   0.45   0.44
   3   1     0.02  -0.03  -0.01    -0.08   0.26  -0.16     0.08   0.53  -0.34
   4   8     0.00   0.00   0.01     0.00   0.00   0.00     0.00  -0.01   0.00
   5   1    -0.08  -0.04  -0.03    -0.01  -0.02  -0.01     0.00   0.00   0.00
   6   6    -0.01   0.01  -0.05     0.01   0.04   0.01     0.00  -0.02   0.00
   7   1     0.01  -0.09   0.69    -0.16   0.25  -0.01     0.09  -0.13  -0.02
   8   1     0.51   0.12   0.03    -0.08  -0.44  -0.40     0.00   0.21   0.19
   9   1    -0.43  -0.18   0.06    -0.03  -0.50   0.31     0.01   0.24  -0.15
                    16                     17                     18
                     A                      A                      A
 Frequencies --  2989.5801              3023.2720              3071.9539
 Red. masses --     1.0725                 1.0372                 1.0945
 Frc consts  --     5.6479                 5.5854                 6.0855
 IR Inten    --    67.0588                16.4917                 4.8855
 Atom AN      X      Y      Z        X      Y      Z        X      Y      Z
   1   6     0.01  -0.05  -0.06     0.00  -0.01   0.00     0.00  -0.03   0.05
   2   1     0.00   0.11  -0.15     0.00   0.04  -0.04    -0.03   0.42  -0.48
   3   1    -0.05   0.48   0.84    -0.01   0.02   0.04     0.01  -0.05  -0.07
   4   8     0.00   0.00   0.00     0.00   0.00   0.00     0.00   0.00   0.00
   5   1     0.00   0.00   0.00     0.00   0.00   0.00     0.00  -0.01   0.01
   6   6     0.00   0.00   0.01    -0.04   0.03  -0.01     0.03   0.04  -0.05
   7   1    -0.05  -0.05   0.00     0.42   0.33   0.03    -0.39  -0.30  -0.04
   8   1     0.00   0.04  -0.05     0.03  -0.46   0.53     0.03  -0.33   0.38
   9   1     0.00  -0.02  -0.04     0.02  -0.22  -0.40    -0.01   0.15   0.24
                    19                     20                     21
                     A                      A                      A
 Frequencies --  3092.3304              3105.4565              3802.7980
 Red. masses --     1.0963                 1.1025                 1.0663
 Frc consts  --     6.1769                 6.2642                 9.0853
 IR Inten    --    53.0216                37.8773                17.8608
 Atom AN      X      Y      Z        X      Y      Z        X      Y      Z
   1   6     0.00  -0.04   0.05     0.00  -0.01   0.03     0.00   0.00   0.00
   2   1    -0.03   0.45  -0.52    -0.02   0.19  -0.22     0.00  -0.01   0.01
   3   1     0.01  -0.05  -0.07     0.01  -0.07  -0.12     0.00   0.00   0.00
   4   8     0.00   0.00   0.00     0.00   0.00   0.00     0.00   0.04  -0.05
   5   1     0.01  -0.01   0.01     0.00   0.00   0.00    -0.02  -0.68   0.73
   6   6    -0.03  -0.05   0.01     0.02   0.04   0.08     0.00   0.00   0.00
   7   1     0.46   0.35   0.04    -0.27  -0.21  -0.01     0.00   0.00   0.00
   8   1    -0.03   0.25  -0.30    -0.01   0.19  -0.20     0.00   0.00   0.00
   9   1    -0.01   0.06   0.13     0.05  -0.42  -0.71     0.00   0.00   0.00

 -------------------
 - Thermochemistry -
 -------------------
 Temperature   298.150 Kelvin.  Pressure   1.00000 Atm.
 Atom  1 has atomic number  6 and mass  12.00000
 Atom  2 has atomic number  1 and mass   1.00783
 Atom  3 has atomic number  1 and mass   1.00783
 Atom  4 has atomic number  8 and mass  15.99491
 Atom  5 has atomic number  1 and mass   1.00783
 Atom  6 has atomic number  6 and mass  12.00000
 Atom  7 has atomic number  1 and mass   1.00783
 Atom  8 has atomic number  1 and mass   1.00783
 Atom  9 has atomic number  1 and mass   1.00783
 Molecular mass:    46.04186 amu.
 Principal axes and moments of inertia in atomic units:
                           1         2         3
     EIGENVALUES --    52.33733 197.49720 223.45423
           X            0.99977  -0.01363  -0.01676
           Y            0.01270   0.99845  -0.05427
           Z            0.01748   0.05405   0.99839
 This molecule is an asymmetric top.
 Rotational symmetry number  1.
 Rotational temperatures (Kelvin)      1.65491     0.43856     0.38761
 Rotational constants (GHZ):          34.48287     9.13806     8.07656
 Zero-point vibrational energy     209571.4 (Joules/Mol)
                                   50.08876 (Kcal/Mol)
 Warning -- explicit consideration of   3 degrees of freedom as
           vibrations may cause significant error
 Vibrational temperatures:    389.68   432.63   610.22  1168.81  1270.10
          (Kelvin)           1522.09  1538.38  1635.92  1842.86  1975.62
                             2028.81  2052.97  2144.97  2151.21  2187.38
                             4301.33  4349.81  4419.85  4449.17  4468.05
                             5471.37
 
 Zero-point correction=                           0.079822 (Hartree/Particle)
 Thermal correction to Energy=                    0.084078
 Thermal correction to Enthalpy=                  0.085023
 Thermal correction to Gibbs Free Energy=         0.054465
 Sum of electronic and zero-point Energies=           -155.024325
 Sum of electronic and thermal Energies=              -155.020069
 Sum of electronic and thermal Enthalpies=            -155.019124
 Sum of electronic and thermal Free Energies=         -155.049682
 
                     E (Thermal)             CV                S
                      KCal/Mol        Cal/Mol-Kelvin    Cal/Mol-Kelvin
 Total                   52.760             13.505             64.313
 Electronic               0.000              0.000              0.000
 Translational            0.889              2.981             37.406
 Rotational               0.889              2.981             22.362
 Vibrational             50.983              7.543              4.545
 Vibration  1             0.675              1.727              1.591
 Vibration  2             0.693              1.672              1.413
 Vibration  3             0.786              1.418              0.878
                       Q            Log10(Q)             Ln(Q)
 Total Bot       0.886677D-25        -25.052235        -57.684902
 Total V=0       0.460298D+12         11.663039         26.855139
 Vib (Bot)       0.419714D-36        -36.377046        -83.761244
 Vib (Bot)  1    0.713250D+00         -0.146758         -0.337923
 Vib (Bot)  2    0.632215D+00         -0.199135         -0.458526
 Vib (Bot)  3    0.412700D+00         -0.384366         -0.885035
 Vib (V=0)       0.217885D+01          0.338227          0.778797
 Vib (V=0)  1    0.137105D+01          0.137053          0.315576
 Vib (V=0)  2    0.130604D+01          0.115956          0.266997
 Vib (V=0)  3    0.114832D+01          0.060064          0.138302
 Electronic      0.100000D+01          0.000000          0.000000
 Translational   0.122796D+08          7.089185         16.323451
 Rotational      0.172039D+05          4.235627          9.752891
 ***** Axes restored to original set *****
 -------------------------------------------------------------------
 Center     Atomic                   Forces (Hartrees/Bohr)
 Number     Number              X              Y              Z
 -------------------------------------------------------------------
    1          6           0.000000040    0.000000240    0.000000195
    2          1          -0.000000038    0.000000018   -0.000000126
    3          1          -0.000000183    0.000000136   -0.000000199
    4          8          -0.000000021    0.000000282   -0.000000175
    5          1          -0.000000119    0.000000100   -0.000000066
    6          6           0.000000086   -0.000000439   -0.000000018
    7          1           0.000000202   -0.000000206    0.000000129
    8          1           0.000000010   -0.000000081    0.000000136
    9          1           0.000000025   -0.000000051    0.000000124
 -------------------------------------------------------------------
 Cartesian Forces:  Max     0.000000439 RMS     0.000000160
 Final structure in terms of initial Z-matrix:
 C
 H,1,B1
 H,1,B2,2,A1
 O,1,B3,3,A2,2,D1,0
 H,4,B4,1,A3,3,D2,0
 C,1,B5,4,A4,5,D3,0
 H,6,B6,1,A5,4,D4,0
 H,6,B7,1,A6,4,D5,0
 H,6,B8,1,A7,4,D6,0
      Variables:
 B1=1.09085173
 B2=1.09775395
 B3=1.42812759
 B4=0.96370365
 B5=1.52145387
 B6=1.09319243
 B7=1.0940655
 B8=1.09143206
 A1=107.28063973
 A2=110.56994861
 A3=108.3750495
 A4=112.97165377
 A5=110.71888322
 A6=111.16289159
 A7=110.67371245
 D1=-114.21822815
 D2=-63.67534069
 D3=60.33551116
 D4=177.01488683
 D5=-63.51294508
 D6=56.69972959
 1\1\RECHENZENTRUM RWTH AACHEN-SRVMBFD\Freq\RB3LYP\TZVP\C2H6O1\JENS\29-
 Jun-2012\0\\# opt=(tight,calcall) freq B3LYP TZVP int=ultrafine maxdis
 k=300GB\\Title Card Required\\0,1\C,-0.0174743451,0.0015685798,-0.0261
 182005\H,-0.0346647264,-0.0475782084,1.0634902484\H,1.0357366926,0.014
 8067658,-0.3353672935\O,-0.6543688196,-1.1988206641,-0.4654125342\H,-0
 .6526796995,-1.2084880537,-1.4290662158\C,-0.7227434452,1.2595619547,-
 0.5107521153\H,-0.2369750478,2.1536254333,-0.1110656862\H,-0.697845489
 3,1.33074174,-1.6022157425\H,-1.7670438809,1.2623409731,-0.1934938164\
 \Version=AM64L-G03RevE.01\State=1-A\HF=-155.104147\RMSD=1.751e-09\RMSF
 =1.598e-07\ZeroPoint=0.0798215\Thermal=0.0840784\Dipole=0.2478953,0.53
 57346,-0.3990577\DipoleDeriv=0.490844,0.1207777,0.0548187,0.1356732,0.
 8080385,0.1110646,0.0672452,0.150594,0.3444658,0.0473611,-0.0077611,0.
 0096699,-0.0002114,-0.0070172,0.0185199,-0.028195,0.0067128,-0.1537339
 ,-0.2336595,-0.0234974,0.0208209,-0.0138914,-0.0518203,-0.0172595,0.07
 68472,-0.0024837,0.0175641,-0.6021042,-0.0944654,-0.0888191,-0.0727766
 ,-0.9266599,-0.1583198,-0.1118007,-0.2257392,-0.3157487,0.3162184,-0.0
 620401,0.0237899,-0.0487161,0.297049,0.086833,0.0108666,0.0387195,0.10
 52058,0.0329261,0.082763,-0.0353718,0.0541631,-0.1020722,0.011663,-0.0
 171237,0.0596696,0.102465,0.0183147,-0.0835288,-0.0455984,-0.0564515,-
 0.1028295,-0.0505014,-0.04563,-0.071598,0.0372024,0.0546238,0.0296527,
 0.01823,0.0137013,0.036645,-0.0194301,-0.0103536,0.026511,-0.1770582,-
 0.1245243,0.0380994,0.0424598,-0.0114905,0.0486666,0.0174303,0.058144,
 0.0176141,0.0396377\Polar=29.0062622,0.1254573,32.0668252,0.8652281,0.
 5303458,30.2411219\PG=C01 [X(C2H6O1)]\NImag=0\\0.54422587,-0.00643043,
 0.42644460,-0.03177528,-0.01118345,0.61513393,-0.05347314,0.00059261,0
 .01707886,0.05371733,0.00014940,-0.04795598,0.02434687,0.00411082,0.06
 295337,0.00956045,0.01550356,-0.30839772,-0.00623692,-0.01194952,0.335
 66624,-0.26551964,0.00786035,0.07038814,-0.00042340,0.00095732,0.00200
 884,0.29475533,0.00827773,-0.04842674,-0.00316573,-0.00160288,0.001895
 64,0.00146111,0.00108245,0.06204443,0.07341076,-0.00050615,-0.08064642
 ,0.03066614,-0.00084109,-0.00878731,-0.07452826,0.00278282,0.07609029,
 -0.09746333,-0.06055206,-0.00514076,-0.00002492,-0.00429491,-0.0037751
 2,-0.01503467,-0.03755801,-0.01529681,0.11102970,-0.05767154,-0.164409
 28,-0.00794511,-0.00414629,-0.00720372,-0.00743390,-0.01494841,-0.0135
 2826,-0.00482147,0.11204578,0.26360756,-0.02600185,-0.05022186,-0.1051
 2943,-0.02076552,-0.03793264,-0.01334305,-0.00252030,0.00311853,0.0063
 8824,0.02460041,0.04989314,0.61337615,-0.00202418,-0.00287241,-0.02234
 111,-0.00111270,-0.00308184,-0.00099276,0.00001108,0.00042098,-0.00127
 579,-0.01192462,-0.01584274,0.02076264,0.01474167,-0.00188682,-0.00500
 255,-0.04078116,-0.00303265,-0.00500935,-0.00188084,-0.00027004,0.0007
 9492,0.00050939,-0.01670472,-0.03362546,0.02943079,0.02114262,0.041893
 86,0.00165666,0.00357620,-0.01526979,-0.00230791,-0.00290640,0.0017806
 1,0.00030371,0.00152161,0.00119884,-0.00363337,-0.01535540,-0.50957643
 ,0.00229929,0.01251659,0.51928088,-0.11524037,0.05100801,-0.02124557,0
 .00083295,-0.00049182,0.00058620,-0.01446027,0.02836019,-0.01148639,0.
 01002499,-0.02190121,0.00358252,0.00041634,0.00052956,0.00138208,0.553
 74499,0.04453849,-0.13935481,0.02883679,0.00247238,-0.00203319,0.00233
 183,0.00244018,-0.00001269,0.00212898,0.00573486,-0.04394182,0.0044981
 0,0.00010046,0.00142369,0.00074225,0.03988017,0.49856892,-0.02030198,0
 .03676671,-0.10009931,-0.01694190,0.02903427,-0.00902081,0.00599115,-0
 .00809091,0.00418759,0.00243404,-0.01717659,0.00468374,0.00141492,-0.0
 0207415,0.00315358,-0.01326438,0.02529978,0.55274298,0.00739972,0.0109
 9074,0.00774545,0.00048637,-0.00058154,0.00005885,0.00004924,-0.000919
 75,0.00041425,0.00043376,0.00432249,-0.00092919,-0.00030669,-0.0000265
 1,-0.00026232,-0.09985064,-0.09432243,-0.04389863,0.10397388,-0.016085
 17,-0.01754423,-0.01265398,-0.00035143,0.00078938,0.00069891,0.0009282
 7,0.00092044,-0.00025859,0.00316110,-0.00747852,0.00170464,0.00002515,
 0.00050207,0.00089703,-0.09317162,-0.21912626,-0.07736172,0.10375373,0
 .23890005,0.00650461,0.00744364,0.00321083,0.00042908,-0.00057682,0.00
 016916,0.00012282,-0.00040969,0.00022679,-0.00060675,0.00327419,0.0010
 4025,-0.00030535,0.00083751,-0.00006084,-0.04398894,-0.07823395,-0.081
 80657,0.04858451,0.08549947,0.08526153,-0.00012270,0.00034441,-0.01883
 615,-0.00059847,0.00342454,-0.00078762,0.00053107,-0.00092474,-0.00017
 407,-0.00021693,-0.00143422,0.00089700,0.00052641,0.00011713,0.0005542
 0,-0.04871244,0.00036102,0.00949137,-0.00016097,0.00152230,-0.01453946
 ,0.04817835,-0.00084160,-0.00288612,0.03105203,0.00286764,-0.00451109,
 0.00158627,-0.00073759,0.00099932,-0.00097752,-0.00002255,0.00329402,-
 0.00025736,-0.00019705,-0.00072416,-0.00082167,-0.00048781,-0.04830985
 ,0.01291952,0.00179939,0.00223282,-0.02694693,-0.00223165,0.05093338,-
 0.00047160,-0.00088929,-0.01239780,-0.00156964,0.00166235,0.00128564,-
 0.00055685,0.00024187,0.00089593,0.00090354,0.00048687,0.00292592,0.00
 008863,0.00126242,-0.00035131,0.00867509,0.01363080,-0.30160703,0.0005
 5699,0.00050409,-0.01128472,-0.00780904,-0.01694314,0.32948160,-0.0177
 8222,-0.00094123,0.00412642,0.00059599,-0.00019197,-0.00042193,0.00009
 124,0.00286404,-0.00172983,0.00317603,-0.00042387,0.00037428,-0.000327
 30,0.00013144,0.00000767,-0.28675555,-0.00120512,0.07507541,-0.0120246
 7,0.00021766,0.00379947,0.00057568,-0.00014880,0.00018289,0.31245080,0
 .02994994,-0.00086488,-0.00850626,-0.00091020,0.00107495,-0.00031741,0
 .00268748,-0.00468705,0.00198362,-0.00180950,0.00328548,-0.00023334,0.
 00030481,-0.00025301,-0.00017020,-0.00372548,-0.04721398,0.00068310,-0
 .02501611,0.00080425,0.00911257,-0.00117878,-0.00102831,0.00004402,-0.
 00030216,0.04888255,-0.01258177,-0.00048935,0.00359572,-0.00035220,-0.
 00083703,0.00064722,-0.00120926,0.00254039,0.00044605,0.00051482,-0.00
 092172,-0.00036540,0.00034954,0.00017945,-0.00015552,0.07575940,0.0007
 6542,-0.07223415,-0.01226991,0.00097015,0.00324356,0.03120377,0.000388
 79,-0.00894822,-0.08141438,-0.00259610,0.07377075\\-0.00000004,-0.0000
 0024,-0.00000019,0.00000004,-0.00000002,0.00000013,0.00000018,-0.00000
 014,0.00000020,0.00000002,-0.00000028,0.00000017,0.00000012,-0.0000001
 0,0.00000007,-0.00000009,0.00000044,0.00000002,-0.00000020,0.00000021,
 -0.00000013,0.,0.00000008,-0.00000014,-0.00000002,0.00000005,-0.000000
 12\\\@


 CHARLIE BROWN..'I CAN'T GET THAT STUPID KITE IN THE   
 AIR... I CAN'T... I C A N N O T...'                          
 LUCY..'OH COME NOW CHARLIE BROWN...THAT'S NO WAY TO TALK...  
 THE TROUBLE WITH YOU IS YOU DON'T BELIEVE IN YOURSELF... YOU 
 DON'T BELIEVE IN YOUR OWN ABILITIES...  YOU'VE GOT TO SAY TO 
 YOURSELF...'I BELIEVE I CAN FLY THIS KITE.'... GO AHEAD SAY  
 IT....'
 CHARLIE BROWN..'I BELIEVE THAT I CAN FLY THIS STUPID  
 KITE.....I BELIEVE THAT I CAN FLY THIS KITE........          
 I  A C T U A L L Y  B E L I E V E  T H A T  I  C A N ******' 
 LUCY..'I'LL BET YOU TEN-TO-ONE YOU'RE WRONG.......'    SCHULZ
 Job cpu time:  0 days  0 hours 24 minutes 43.0 seconds.
 File lengths (MBytes):  RWF=     23 Int=      0 D2E=      0 Chk=     10 Scr=      1
 Normal termination of Gaussian 03 at Fri Jun 29 09:57:29 2012.
 Link1:  Proceeding to internal job step number  2.
 --------------------------------------------------------------
 #N Geom=AllCheck Guess=Read SCRF=Check GenChk RB3LYP/TZVP Freq
 --------------------------------------------------------------
 1/7=10,10=4,29=7,30=1,38=1,40=1,46=1/1,3;
 2/40=1/2;
 3/5=19,7=101,11=2,16=1,25=1,30=1,70=2,71=2,74=-5,75=5/1,2,3;
 4/5=1,7=1/1;
 5/5=2,38=6/2;
 8/6=4,10=90,11=11/1;
 11/6=1,8=1,9=11,15=111,16=1/1,2,10;
 10/6=1/2;
 6/7=2,8=2,9=2,10=2,18=1,28=1/1;
 7/8=1,10=1,25=1/1,2,3,16;
 1/10=4,30=1,46=1/3;
 99//99;
 -------------------
 Title Card Required
 -------------------
 Redundant internal coordinates taken from checkpoint file:
 EtOH_opt_freq_B3LYP_TZVP.chk
 Charge =  0 Multiplicity = 1
 C,0,-0.0174743451,0.0015685798,-0.0261182005
 H,0,-0.0346647264,-0.0475782084,1.0634902484
 H,0,1.0357366926,0.0148067658,-0.3353672935
 O,0,-0.6543688196,-1.1988206641,-0.4654125342
 H,0,-0.6526796995,-1.2084880537,-1.4290662158
 C,0,-0.7227434452,1.2595619547,-0.5107521153
 H,0,-0.2369750478,2.1536254333,-0.1110656862
 H,0,-0.6978454893,1.33074174,-1.6022157425
 H,0,-1.7670438809,1.2623409731,-0.1934938164
 Recover connectivity data from disk.

 GradGradGradGradGradGradGradGradGradGradGradGradGradGradGradGradGradGrad
 Berny optimization.
 Initialization pass.
                           ----------------------------
                           !    Initial Parameters    !
                           ! (Angstroms and Degrees)  !
 --------------------------                            --------------------------
 ! Name  Definition              Value          Derivative Info.                !
 --------------------------------------------------------------------------------
 ! R1    R(1,2)                  1.0909         calculate D2E/DX2 analytically  !
 ! R2    R(1,3)                  1.0978         calculate D2E/DX2 analytically  !
 ! R3    R(1,4)                  1.4281         calculate D2E/DX2 analytically  !
 ! R4    R(1,6)                  1.5215         calculate D2E/DX2 analytically  !
 ! R5    R(4,5)                  0.9637         calculate D2E/DX2 analytically  !
 ! R6    R(6,7)                  1.0932         calculate D2E/DX2 analytically  !
 ! R7    R(6,8)                  1.0941         calculate D2E/DX2 analytically  !
 ! R8    R(6,9)                  1.0914         calculate D2E/DX2 analytically  !
 ! A1    A(2,1,3)              107.2806         calculate D2E/DX2 analytically  !
 ! A2    A(2,1,4)              105.2098         calculate D2E/DX2 analytically  !
 ! A3    A(2,1,6)              110.3722         calculate D2E/DX2 analytically  !
 ! A4    A(3,1,4)              110.5699         calculate D2E/DX2 analytically  !
 ! A5    A(3,1,6)              110.1839         calculate D2E/DX2 analytically  !
 ! A6    A(4,1,6)              112.9717         calculate D2E/DX2 analytically  !
 ! A7    A(1,4,5)              108.375          calculate D2E/DX2 analytically  !
 ! A8    A(1,6,7)              110.7189         calculate D2E/DX2 analytically  !
 ! A9    A(1,6,8)              111.1629         calculate D2E/DX2 analytically  !
 ! A10   A(1,6,9)              110.6737         calculate D2E/DX2 analytically  !
 ! A11   A(7,6,8)              107.5431         calculate D2E/DX2 analytically  !
 ! A12   A(7,6,9)              108.4701         calculate D2E/DX2 analytically  !
 ! A13   A(8,6,9)              108.1556         calculate D2E/DX2 analytically  !
 ! D1    D(2,1,4,5)           -179.1954         calculate D2E/DX2 analytically  !
 ! D2    D(3,1,4,5)            -63.6753         calculate D2E/DX2 analytically  !
 ! D3    D(6,1,4,5)             60.3355         calculate D2E/DX2 analytically  !
 ! D4    D(2,1,6,7)             59.5391         calculate D2E/DX2 analytically  !
 ! D5    D(2,1,6,8)            179.0113         calculate D2E/DX2 analytically  !
 ! D6    D(2,1,6,9)            -60.7761         calculate D2E/DX2 analytically  !
 ! D7    D(3,1,6,7)            -58.7626         calculate D2E/DX2 analytically  !
 ! D8    D(3,1,6,8)             60.7096         calculate D2E/DX2 analytically  !
 ! D9    D(3,1,6,9)           -179.0778         calculate D2E/DX2 analytically  !
 ! D10   D(4,1,6,7)            177.0149         calculate D2E/DX2 analytically  !
 ! D11   D(4,1,6,8)            -63.5129         calculate D2E/DX2 analytically  !
 ! D12   D(4,1,6,9)             56.6997         calculate D2E/DX2 analytically  !
 --------------------------------------------------------------------------------
 Trust Radius=3.00D-01 FncErr=1.00D-07 GrdErr=1.00D-07
 Number of steps in this run=   2 maximum allowed number of steps=   2.
 GradGradGradGradGradGradGradGradGradGradGradGradGradGradGradGradGradGrad

                          Input orientation:                          
 ---------------------------------------------------------------------
 Center     Atomic     Atomic              Coordinates (Angstroms)
 Number     Number      Type              X           Y           Z
 ---------------------------------------------------------------------
    1          6             0       -0.017474    0.001569   -0.026118
    2          1             0       -0.034665   -0.047578    1.063490
    3          1             0        1.035737    0.014807   -0.335367
    4          8             0       -0.654369   -1.198821   -0.465413
    5          1             0       -0.652680   -1.208488   -1.429066
    6          6             0       -0.722743    1.259562   -0.510752
    7          1             0       -0.236975    2.153625   -0.111066
    8          1             0       -0.697845    1.330742   -1.602216
    9          1             0       -1.767044    1.262341   -0.193494
 ---------------------------------------------------------------------
                    Distance matrix (angstroms):
                    1          2          3          4          5
     1  C    0.000000
     2  H    1.090852   0.000000
     3  H    1.097754   1.762513   0.000000
     4  O    1.428128   2.011700   2.084769   0.000000
     5  H    1.958567   2.818243   2.354438   0.963704   0.000000
     6  C    1.521454   2.158774   2.161580   2.459751   2.634289
     7  H    2.164889   2.503160   2.498930   3.396862   3.635071
     8  H    2.171103   3.073363   2.518312   2.773607   2.545527
     9  H    2.162997   2.509389   3.071164   2.714646   2.978832
                    6          7          8          9
     6  C    0.000000
     7  H    1.093192   0.000000
     8  H    1.094066   1.764389   0.000000
     9  H    1.091432   1.772651   1.769848   0.000000
 Stoichiometry    C2H6O
 Framework group  C1[X(C2H6O)]
 Deg. of freedom    21
 Full point group                 C1
 Largest Abelian subgroup         C1      NOp   1
 Largest concise Abelian subgroup C1      NOp   1
                         Standard orientation:                         
 ---------------------------------------------------------------------
 Center     Atomic     Atomic              Coordinates (Angstroms)
 Number     Number      Type              X           Y           Z
 ---------------------------------------------------------------------
    1          6             0       -0.079098    0.556136    0.046968
    2          1             0       -0.123835    1.278484   -0.769224
    3          1             0       -0.125563    1.122235    0.986349
    4          8             0       -1.243464   -0.256245   -0.107428
    5          1             0       -1.256195   -0.907104    0.603167
    6          6             0        1.214754   -0.241376   -0.021888
    7          1             0        2.081576    0.421111    0.047405
    8          1             0        1.281054   -0.958450    0.801755
    9          1             0        1.276739   -0.794879   -0.960512
 ---------------------------------------------------------------------
 Rotational constants (GHZ):     34.4828704      9.1380595      8.0765586
 Standard basis: TZVP (5D, 7F)
 There are    93 symmetry adapted basis functions of A   symmetry.
 Integral buffers will be    131072 words long.
 Raffenetti 2 integral format.
 Two-electron integral symmetry is turned on.
    93 basis functions,   153 primitive gaussians,    96 cartesian basis functions
    13 alpha electrons       13 beta electrons
       nuclear repulsion energy        81.5049225771 Hartrees.
 NAtoms=    9 NActive=    9 NUniq=    9 SFac= 7.50D-01 NAtFMM=   80 NAOKFM=F Big=F
 One-electron integrals computed using PRISM.
 NBasis=    93 RedAO= T  NBF=    93
 NBsUse=    93 1.00D-06 NBFU=    93
 Initial guess read from the checkpoint file:
 EtOH_opt_freq_B3LYP_TZVP.chk
 Initial guess orbital symmetries:
       Occupied  (A) (A) (A) (A) (A) (A) (A) (A) (A) (A) (A) (A)
                 (A)
       Virtual   (A) (A) (A) (A) (A) (A) (A) (A) (A) (A) (A) (A)
                 (A) (A) (A) (A) (A) (A) (A) (A) (A) (A) (A) (A)
                 (A) (A) (A) (A) (A) (A) (A) (A) (A) (A) (A) (A)
                 (A) (A) (A) (A) (A) (A) (A) (A) (A) (A) (A) (A)
                 (A) (A) (A) (A) (A) (A) (A) (A) (A) (A) (A) (A)
                 (A) (A) (A) (A) (A) (A) (A) (A) (A) (A) (A) (A)
                 (A) (A) (A) (A) (A) (A) (A) (A)
 Requested convergence on RMS density matrix=1.00D-08 within 128 cycles.
 Requested convergence on MAX density matrix=1.00D-06.
 Requested convergence on             energy=1.00D-06.
 No special actions if energy rises.
 Keep R1 integrals in memory in canonical form, NReq=    12835505.
 SCF Done:  E(RB+HF-LYP) =  -155.104146972     A.U. after    1 cycles
             Convg  =    0.6799D-09             -V/T =  2.0049
             S**2   =   0.0000
 Range of M.O.s used for correlation:     1    93
 NBasis=    93 NAE=    13 NBE=    13 NFC=     0 NFV=     0
 NROrb=     93 NOA=    13 NOB=    13 NVA=    80 NVB=    80

 **** Warning!!: The largest alpha MO coefficient is  0.19081840D+02

 Symmetrizing basis deriv contribution to polar:
 IMax=3 JMax=2 DiffMx= 0.00D+00
 G2DrvN: will do   10 centers at a time, making    1 passes doing MaxLOS=2.
 FoFDir/FoFCou used for L=0 through L=2.
 DoAtom=TTTTTTTTT
          Differentiating once with respect to electric field.
                with respect to dipole field.
          Differentiating once with respect to nuclear coordinates.
          Store integrals in memory, NReq=    11662372.
          There are  30 degrees of freedom in the 1st order CPHF.
    27 vectors were produced by pass  0.
 AX will form  27 AO Fock derivatives at one time.
    27 vectors were produced by pass  1.
    27 vectors were produced by pass  2.
    27 vectors were produced by pass  3.
    27 vectors were produced by pass  4.
    13 vectors were produced by pass  5.
     3 vectors were produced by pass  6.
 Inv2:  IOpt= 1 Iter= 1 AM= 1.39D-15 Conv= 1.00D-12.
 Inverted reduced A of dimension  151 with in-core refinement.
 Isotropic polarizability for W=    0.000000       30.44 Bohr**3.
 End of Minotr Frequency-dependent properties file   721 does not exist.

 **********************************************************************

            Population analysis using the SCF density.

 **********************************************************************

 Orbital symmetries:
       Occupied  (A) (A) (A) (A) (A) (A) (A) (A) (A) (A) (A) (A)
                 (A)
       Virtual   (A) (A) (A) (A) (A) (A) (A) (A) (A) (A) (A) (A)
                 (A) (A) (A) (A) (A) (A) (A) (A) (A) (A) (A) (A)
                 (A) (A) (A) (A) (A) (A) (A) (A) (A) (A) (A) (A)
                 (A) (A) (A) (A) (A) (A) (A) (A) (A) (A) (A) (A)
                 (A) (A) (A) (A) (A) (A) (A) (A) (A) (A) (A) (A)
                 (A) (A) (A) (A) (A) (A) (A) (A) (A) (A) (A) (A)
                 (A) (A) (A) (A) (A) (A) (A) (A)
 The electronic state is 1-A.
 Alpha  occ. eigenvalues --  -19.12360 -10.21915 -10.16739  -1.02114  -0.75294
 Alpha  occ. eigenvalues --   -0.62953  -0.50696  -0.45821  -0.43718  -0.38775
 Alpha  occ. eigenvalues --   -0.37656  -0.33151  -0.27889
 Alpha virt. eigenvalues --    0.02425   0.06255   0.08115   0.10022   0.10990
 Alpha virt. eigenvalues --    0.12631   0.14176   0.18348   0.19852   0.22920
 Alpha virt. eigenvalues --    0.27262   0.28260   0.31138   0.37686   0.39287
 Alpha virt. eigenvalues --    0.40586   0.42253   0.44619   0.45024   0.49490
 Alpha virt. eigenvalues --    0.50854   0.53832   0.54960   0.58108   0.59705
 Alpha virt. eigenvalues --    0.81753   1.12558   1.17786   1.25514   1.26281
 Alpha virt. eigenvalues --    1.29380   1.31526   1.33831   1.35257   1.39493
 Alpha virt. eigenvalues --    1.45259   1.48423   1.50946   1.53289   1.58748
 Alpha virt. eigenvalues --    1.63665   1.74398   1.77908   1.78669   1.82832
 Alpha virt. eigenvalues --    1.84966   1.87931   1.95463   2.02335   2.08891
 Alpha virt. eigenvalues --    2.17841   2.19118   2.25020   2.31551   2.35074
 Alpha virt. eigenvalues --    2.39514   2.51227   2.52023   2.55316   2.59687
 Alpha virt. eigenvalues --    2.61672   2.65927   2.68703   2.69041   2.86909
 Alpha virt. eigenvalues --    2.90791   2.96311   3.05611   3.09445   3.16189
 Alpha virt. eigenvalues --    3.17782   3.31811   3.32958   3.35934   3.38064
 Alpha virt. eigenvalues --    3.95125   4.30703  21.87229  22.01366  43.43134
          Condensed to atoms (all electrons):
              1          2          3          4          5          6
     1  C    4.882127   0.400247   0.391613   0.249671  -0.041998   0.290598
     2  H    0.400247   0.625021  -0.053042  -0.051523   0.012930  -0.049621
     3  H    0.391613  -0.053042   0.677214  -0.047548  -0.010765  -0.060135
     4  O    0.249671  -0.051523  -0.047548   7.981591   0.295501  -0.044933
     5  H   -0.041998   0.012930  -0.010765   0.295501   0.489474  -0.008649
     6  C    0.290598  -0.049621  -0.060135  -0.044933  -0.008649   5.073284
     7  H   -0.035357  -0.000850   0.005140   0.009170   0.000353   0.368342
     8  H   -0.034967   0.011061  -0.013553  -0.006363   0.008192   0.392825
     9  H   -0.040377  -0.011216   0.012020   0.004643  -0.002430   0.398247
              7          8          9
     1  C   -0.035357  -0.034967  -0.040377
     2  H   -0.000850   0.011061  -0.011216
     3  H    0.005140  -0.013553   0.012020
     4  O    0.009170  -0.006363   0.004643
     5  H    0.000353   0.008192  -0.002430
     6  C    0.368342   0.392825   0.398247
     7  H    0.595632  -0.028825  -0.023231
     8  H   -0.028825   0.605976  -0.036789
     9  H   -0.023231  -0.036789   0.572924
 Mulliken atomic charges:
              1
     1  C   -0.061557
     2  H    0.116994
     3  H    0.099057
     4  O   -0.390209
     5  H    0.257393
     6  C   -0.359957
     7  H    0.109627
     8  H    0.102443
     9  H    0.126210
 Sum of Mulliken charges=   0.00000
 Atomic charges with hydrogens summed into heavy atoms:
              1
     1  C    0.154493
     2  H    0.000000
     3  H    0.000000
     4  O   -0.132816
     5  H    0.000000
     6  C   -0.021677
     7  H    0.000000
     8  H    0.000000
     9  H    0.000000
 Sum of Mulliken charges=   0.00000
 APT atomic charges:
              1
     1  C    0.547783
     2  H   -0.037797
     3  H   -0.089305
     4  O   -0.614838
     5  H    0.239491
     6  C    0.011106
     7  H   -0.015771
     8  H   -0.028596
     9  H   -0.012073
 Sum of APT charges=   0.00000
 APT Atomic charges with hydrogens summed into heavy atoms:
              1
     1  C    0.420681
     2  H    0.000000
     3  H    0.000000
     4  O   -0.375347
     5  H    0.000000
     6  C   -0.045334
     7  H    0.000000
     8  H    0.000000
     9  H    0.000000
 Sum of APT charges=   0.00000
 Electronic spatial extent (au):  <R**2>=   196.2342
 Charge=     0.0000 electrons
 Dipole moment (field-independent basis, Debye):
    X=     1.3213    Y=    -0.1694    Z=     1.2270  Tot=     1.8111
 Quadrupole moment (field-independent basis, Debye-Ang):
   XX=   -22.7113   YY=   -18.8353   ZZ=   -19.4415
   XY=     1.0491   XZ=    -1.9024   YZ=    -1.4956
 Traceless Quadrupole moment (field-independent basis, Debye-Ang):
   XX=    -2.3819   YY=     1.4941   ZZ=     0.8879
   XY=     1.0491   XZ=    -1.9024   YZ=    -1.4956
 Octapole moment (field-independent basis, Debye-Ang**2):
  XXX=    -1.2114  YYY=    -2.0230  ZZZ=     0.4102  XYY=    -3.3528
  XXY=    -1.4098  XXZ=     2.4227  XZZ=    -2.3275  YZZ=    -0.8581
  YYZ=     0.9441  XYZ=     1.8214
 Hexadecapole moment (field-independent basis, Debye-Ang**3):
 XXXX=  -168.6934 YYYY=   -58.0305 ZZZZ=   -35.6520 XXXY=     7.2420
 XXXZ=    -3.4521 YYYX=     4.2720 YYYZ=    -2.5245 ZZZX=    -1.6347
 ZZZY=    -1.2025 XXYY=   -34.2926 XXZZ=   -32.9942 YYZZ=   -14.0070
 XXYZ=    -2.3340 YYXZ=    -1.4784 ZZXY=     0.4953
 N-N= 8.150492257714D+01 E-N=-5.255535937331D+02  KE= 1.543435541011D+02
  Exact polarizability:  32.046   0.541  30.472  -0.149  -0.678  28.796
 Approx polarizability:  38.816   1.974  39.340   0.484  -1.426  38.647
 Full mass-weighted force constant matrix:
 Low frequencies ---   -6.8108   -5.2491   -0.0019   -0.0018   -0.0012    1.8559
 Low frequencies ---  270.8425  300.6929  424.1215
 Diagonal vibrational polarizability:
       18.5312955      13.4962789      14.4256070
 Harmonic frequencies (cm**-1), IR intensities (KM/Mole), Raman scattering
 activities (A**4/AMU), depolarization ratios for plane and unpolarized
 incident light, reduced masses (AMU), force constants (mDyne/A),
 and normal coordinates:
                     1                      2                      3
                     A                      A                      A
 Frequencies --   270.8425               300.6928               424.1215
 Red. masses --     1.0864                 1.1121                 2.7149
 Frc consts  --     0.0470                 0.0592                 0.2877
 IR Inten    --     4.5339               124.1201                17.4487
 Atom AN      X      Y      Z        X      Y      Z        X      Y      Z
   1   6     0.00   0.00  -0.06     0.00   0.03  -0.04    -0.01   0.18   0.04
   2   1    -0.01  -0.06  -0.12    -0.01  -0.02  -0.09    -0.06   0.18   0.04
   3   1     0.02   0.08  -0.11     0.03   0.09  -0.08    -0.09   0.14   0.06
   4   8     0.00  -0.01   0.05     0.00   0.03   0.05     0.22  -0.11  -0.03
   5   1    -0.05   0.16   0.20     0.58  -0.58  -0.49     0.15   0.19   0.24
   6   6     0.00   0.00   0.00    -0.04  -0.02   0.02    -0.20  -0.03  -0.01
   7   1    -0.01  -0.04   0.57     0.00  -0.08   0.12     0.09  -0.41  -0.06
   8   1    -0.29  -0.34  -0.28    -0.15  -0.04   0.02    -0.46  -0.10  -0.05
   9   1     0.31   0.38  -0.20     0.02   0.00   0.02    -0.53  -0.06  -0.02
                     4                      5                      6
                     A                      A                      A
 Frequencies --   812.3628               882.7648              1057.9059
 Red. masses --     1.0845                 2.3439                 2.8667
 Frc consts  --     0.4217                 1.0762                 1.8903
 IR Inten    --     2.8231                13.4897                20.4119
 Atom AN      X      Y      Z        X      Y      Z        X      Y      Z
   1   6     0.00   0.01  -0.07     0.01  -0.17  -0.02     0.31  -0.06   0.02
   2   1    -0.22   0.37   0.27     0.17  -0.14  -0.01     0.17  -0.18  -0.07
   3   1     0.21  -0.41   0.20     0.21  -0.12  -0.02     0.38  -0.01  -0.03
   4   8     0.00  -0.01   0.01     0.15   0.08   0.02    -0.11  -0.08  -0.01
   5   1     0.07   0.07   0.08     0.01   0.05  -0.02    -0.37  -0.20  -0.12
   6   6     0.00   0.00  -0.04    -0.22   0.01  -0.01    -0.11   0.18  -0.01
   7   1     0.01  -0.03   0.18    -0.63   0.55   0.06     0.10  -0.11   0.04
   8   1    -0.33   0.25   0.21     0.13   0.13   0.06    -0.50   0.19   0.03
   9   1     0.33  -0.29   0.16     0.18   0.09  -0.03    -0.36   0.08   0.05
                     7                      8                      9
                     A                      A                      A
 Frequencies --  1069.2261              1137.0214              1280.8513
 Red. masses --     1.5809                 1.6971                 1.3113
 Frc consts  --     1.0649                 1.2927                 1.2675
 IR Inten    --   108.3295                 3.9050                11.7354
 Atom AN      X      Y      Z        X      Y      Z        X      Y      Z
   1   6     0.10   0.10  -0.05     0.03   0.15   0.12    -0.02  -0.05   0.10
   2   1     0.41   0.29   0.11    -0.13  -0.15  -0.13     0.53  -0.20  -0.06
   3   1     0.00  -0.16   0.09     0.31   0.46  -0.05    -0.40   0.12  -0.03
   4   8    -0.10  -0.07  -0.02    -0.02  -0.06  -0.03    -0.02   0.01  -0.02
   5   1     0.51   0.20   0.25    -0.28  -0.15  -0.11     0.40   0.19   0.16
   6   6    -0.05  -0.06   0.05    -0.02  -0.10  -0.09     0.01   0.04  -0.11
   7   1    -0.26   0.24  -0.08    -0.26   0.21   0.17     0.07  -0.08   0.20
   8   1     0.35  -0.09  -0.03     0.10   0.18   0.14    -0.24   0.21   0.07
   9   1     0.03   0.17  -0.08     0.48  -0.17   0.00     0.15  -0.26   0.08
                    10                     11                     12
                     A                      A                      A
 Frequencies --  1373.1248              1410.0959              1426.8844
 Red. masses --     1.1862                 1.2047                 1.2800
 Frc consts  --     1.3177                 1.4113                 1.5355
 IR Inten    --     2.2415                 7.7890                39.5326
 Atom AN      X      Y      Z        X      Y      Z        X      Y      Z
   1   6    -0.06  -0.04   0.05     0.05  -0.02   0.02    -0.11   0.03  -0.02
   2   1    -0.21  -0.19  -0.06    -0.44  -0.07   0.00     0.64   0.08  -0.03
   3   1     0.74   0.12   0.01    -0.19   0.06  -0.03     0.42  -0.05   0.06
   4   8    -0.02   0.01  -0.06    -0.01   0.02  -0.02     0.01  -0.02   0.02
   5   1     0.45   0.23   0.17     0.22   0.11   0.07    -0.21  -0.12  -0.08
   6   6     0.00   0.04   0.02     0.09  -0.07  -0.01     0.09  -0.02   0.00
   7   1     0.10  -0.09   0.03    -0.30   0.41   0.13    -0.14   0.28   0.01
   8   1     0.06  -0.09  -0.08    -0.34   0.12   0.18    -0.34  -0.01   0.03
   9   1    -0.09  -0.05   0.06    -0.46   0.12  -0.14    -0.31   0.00  -0.03
                    13                     14                     15
                     A                      A                      A
 Frequencies --  1490.8318              1495.1708              1520.3095
 Red. masses --     1.0444                 1.0442                 1.0868
 Frc consts  --     1.3676                 1.3753                 1.4800
 IR Inten    --     7.2811                 2.3195                 1.0738
 Atom AN      X      Y      Z        X      Y      Z        X      Y      Z
   1   6     0.00   0.01  -0.03     0.03  -0.02   0.00    -0.01  -0.08  -0.01
   2   1     0.02   0.07   0.02    -0.06   0.23   0.21     0.08   0.45   0.44
   3   1     0.02  -0.03  -0.01    -0.08   0.26  -0.16     0.08   0.53  -0.34
   4   8     0.00   0.00   0.01     0.00   0.00   0.00     0.00  -0.01   0.00
   5   1    -0.08  -0.04  -0.03    -0.01  -0.02  -0.01     0.00   0.00   0.00
   6   6    -0.01   0.01  -0.05     0.01   0.04   0.01     0.00  -0.02   0.00
   7   1     0.01  -0.09   0.69    -0.16   0.25  -0.01     0.09  -0.13  -0.02
   8   1     0.51   0.12   0.03    -0.08  -0.44  -0.40     0.00   0.21   0.19
   9   1    -0.43  -0.18   0.06    -0.03  -0.50   0.31     0.01   0.24  -0.15
                    16                     17                     18
                     A                      A                      A
 Frequencies --  2989.5801              3023.2720              3071.9539
 Red. masses --     1.0725                 1.0372                 1.0945
 Frc consts  --     5.6479                 5.5854                 6.0855
 IR Inten    --    67.0588                16.4917                 4.8855
 Atom AN      X      Y      Z        X      Y      Z        X      Y      Z
   1   6     0.01  -0.05  -0.06     0.00  -0.01   0.00     0.00  -0.03   0.05
   2   1     0.00   0.11  -0.15     0.00   0.04  -0.04    -0.03   0.42  -0.48
   3   1    -0.05   0.48   0.84    -0.01   0.02   0.04     0.01  -0.05  -0.07
   4   8     0.00   0.00   0.00     0.00   0.00   0.00     0.00   0.00   0.00
   5   1     0.00   0.00   0.00     0.00   0.00   0.00     0.00  -0.01   0.01
   6   6     0.00   0.00   0.01    -0.04   0.03  -0.01     0.03   0.04  -0.05
   7   1    -0.05  -0.05   0.00     0.42   0.33   0.03    -0.39  -0.30  -0.04
   8   1     0.00   0.04  -0.05     0.03  -0.46   0.53     0.03  -0.33   0.38
   9   1     0.00  -0.02  -0.04     0.02  -0.22  -0.40    -0.01   0.15   0.24
                    19                     20                     21
                     A                      A                      A
 Frequencies --  3092.3304              3105.4565              3802.7979
 Red. masses --     1.0963                 1.1025                 1.0663
 Frc consts  --     6.1769                 6.2642                 9.0853
 IR Inten    --    53.0216                37.8772                17.8608
 Atom AN      X      Y      Z        X      Y      Z        X      Y      Z
   1   6     0.00  -0.04   0.05     0.00  -0.01   0.03     0.00   0.00   0.00
   2   1    -0.03   0.45  -0.52    -0.02   0.19  -0.22     0.00  -0.01   0.01
   3   1     0.01  -0.05  -0.07     0.01  -0.07  -0.12     0.00   0.00   0.00
   4   8     0.00   0.00   0.00     0.00   0.00   0.00     0.00   0.04  -0.05
   5   1     0.01  -0.01   0.01     0.00   0.00   0.00    -0.02  -0.68   0.73
   6   6    -0.03  -0.05   0.01     0.02   0.04   0.08     0.00   0.00   0.00
   7   1     0.46   0.35   0.04    -0.27  -0.21  -0.01     0.00   0.00   0.00
   8   1    -0.03   0.25  -0.30    -0.01   0.19  -0.20     0.00   0.00   0.00
   9   1    -0.01   0.06   0.13     0.05  -0.42  -0.71     0.00   0.00   0.00

 -------------------
 - Thermochemistry -
 -------------------
 Temperature   298.150 Kelvin.  Pressure   1.00000 Atm.
 Atom  1 has atomic number  6 and mass  12.00000
 Atom  2 has atomic number  1 and mass   1.00783
 Atom  3 has atomic number  1 and mass   1.00783
 Atom  4 has atomic number  8 and mass  15.99491
 Atom  5 has atomic number  1 and mass   1.00783
 Atom  6 has atomic number  6 and mass  12.00000
 Atom  7 has atomic number  1 and mass   1.00783
 Atom  8 has atomic number  1 and mass   1.00783
 Atom  9 has atomic number  1 and mass   1.00783
 Molecular mass:    46.04186 amu.
 Principal axes and moments of inertia in atomic units:
                           1         2         3
     EIGENVALUES --    52.33733 197.49720 223.45423
           X            0.99977  -0.01363  -0.01676
           Y            0.01270   0.99845  -0.05427
           Z            0.01748   0.05405   0.99839
 This molecule is an asymmetric top.
 Rotational symmetry number  1.
 Rotational temperatures (Kelvin)      1.65491     0.43856     0.38761
 Rotational constants (GHZ):          34.48287     9.13806     8.07656
 Zero-point vibrational energy     209571.4 (Joules/Mol)
                                   50.08876 (Kcal/Mol)
 Warning -- explicit consideration of   3 degrees of freedom as
           vibrations may cause significant error
 Vibrational temperatures:    389.68   432.63   610.22  1168.81  1270.10
          (Kelvin)           1522.09  1538.38  1635.92  1842.86  1975.62
                             2028.81  2052.97  2144.97  2151.21  2187.38
                             4301.33  4349.81  4419.85  4449.17  4468.05
                             5471.37
 
 Zero-point correction=                           0.079822 (Hartree/Particle)
 Thermal correction to Energy=                    0.084078
 Thermal correction to Enthalpy=                  0.085023
 Thermal correction to Gibbs Free Energy=         0.054465
 Sum of electronic and zero-point Energies=           -155.024325
 Sum of electronic and thermal Energies=              -155.020069
 Sum of electronic and thermal Enthalpies=            -155.019124
 Sum of electronic and thermal Free Energies=         -155.049682
 
                     E (Thermal)             CV                S
                      KCal/Mol        Cal/Mol-Kelvin    Cal/Mol-Kelvin
 Total                   52.760             13.505             64.313
 Electronic               0.000              0.000              0.000
 Translational            0.889              2.981             37.406
 Rotational               0.889              2.981             22.362
 Vibrational             50.983              7.543              4.545
 Vibration  1             0.675              1.727              1.591
 Vibration  2             0.693              1.672              1.413
 Vibration  3             0.786              1.418              0.878
                       Q            Log10(Q)             Ln(Q)
 Total Bot       0.886677D-25        -25.052235        -57.684902
 Total V=0       0.460298D+12         11.663039         26.855139
 Vib (Bot)       0.419715D-36        -36.377046        -83.761244
 Vib (Bot)  1    0.713250D+00         -0.146758         -0.337923
 Vib (Bot)  2    0.632215D+00         -0.199135         -0.458525
 Vib (Bot)  3    0.412700D+00         -0.384366         -0.885035
 Vib (V=0)       0.217885D+01          0.338227          0.778797
 Vib (V=0)  1    0.137105D+01          0.137053          0.315576
 Vib (V=0)  2    0.130604D+01          0.115956          0.266998
 Vib (V=0)  3    0.114832D+01          0.060064          0.138302
 Electronic      0.100000D+01          0.000000          0.000000
 Translational   0.122796D+08          7.089185         16.323451
 Rotational      0.172039D+05          4.235627          9.752891
 ***** Axes restored to original set *****
 -------------------------------------------------------------------
 Center     Atomic                   Forces (Hartrees/Bohr)
 Number     Number              X              Y              Z
 -------------------------------------------------------------------
    1          6           0.000000030    0.000000228    0.000000194
    2          1          -0.000000038    0.000000019   -0.000000127
    3          1          -0.000000180    0.000000137   -0.000000200
    4          8          -0.000000017    0.000000293   -0.000000179
    5          1          -0.000000118    0.000000100   -0.000000060
    6          6           0.000000080   -0.000000450   -0.000000019
    7          1           0.000000207   -0.000000197    0.000000133
    8          1           0.000000009   -0.000000080    0.000000136
    9          1           0.000000027   -0.000000050    0.000000123
 -------------------------------------------------------------------
 Cartesian Forces:  Max     0.000000450 RMS     0.000000161

 GradGradGradGradGradGradGradGradGradGradGradGradGradGradGradGradGradGrad
 Berny optimization.
 Internal  Forces:  Max     0.000000859 RMS     0.000000207
 Search for a local minimum.
 Step number   1 out of a maximum of   2
 All quantities printed in internal units (Hartrees-Bohrs-Radians)
 Second derivative matrix not updated -- analytic derivatives used.
     Eigenvalues ---    0.00284   0.00322   0.04379   0.04404   0.04918
     Eigenvalues ---    0.05932   0.10055   0.12021   0.12325   0.12920
     Eigenvalues ---    0.16029   0.16951   0.24117   0.28819   0.31237
     Eigenvalues ---    0.32870   0.33175   0.33509   0.34195   0.36787
     Eigenvalues ---    0.520441000.000001000.000001000.000001000.00000
     Eigenvalues --- 1000.000001000.000001000.000001000.000001000.00000
     Eigenvalues --- 1000.000001000.000001000.00000
 Angle between quadratic step and forces=  75.53 degrees.
 Linear search not attempted -- first point.
 Iteration  1 RMS(Cart)=  0.00000440 RMS(Int)=  0.00000000
 Iteration  2 RMS(Cart)=  0.00000000 RMS(Int)=  0.00000000
 Variable       Old X    -DE/DX   Delta X   Delta X   Delta X     New X
                                 (Linear)    (Quad)   (Total)
    R1        2.06141   0.00000   0.00000   0.00000   0.00000   2.06141
    R2        2.07445   0.00000   0.00000   0.00000   0.00000   2.07445
    R3        2.69877   0.00000   0.00000   0.00000   0.00000   2.69877
    R4        2.87513   0.00000   0.00000   0.00000   0.00000   2.87513
    R5        1.82114   0.00000   0.00000   0.00000   0.00000   1.82114
    R6        2.06583   0.00000   0.00000   0.00000   0.00000   2.06583
    R7        2.06748   0.00000   0.00000   0.00000   0.00000   2.06748
    R8        2.06251   0.00000   0.00000   0.00000   0.00000   2.06251
    A1        1.87240   0.00000   0.00000   0.00000   0.00000   1.87240
    A2        1.83626   0.00000   0.00000   0.00000   0.00000   1.83626
    A3        1.92636   0.00000   0.00000   0.00000   0.00000   1.92636
    A4        1.92981   0.00000   0.00000   0.00000   0.00000   1.92981
    A5        1.92307   0.00000   0.00000   0.00000   0.00000   1.92307
    A6        1.97173   0.00000   0.00000   0.00000   0.00000   1.97173
    A7        1.89150   0.00000   0.00000   0.00000   0.00000   1.89150
    A8        1.93241   0.00000   0.00000   0.00000   0.00000   1.93241
    A9        1.94016   0.00000   0.00000   0.00000   0.00000   1.94016
   A10        1.93162   0.00000   0.00000   0.00000   0.00000   1.93162
   A11        1.87698   0.00000   0.00000   0.00000   0.00000   1.87698
   A12        1.89316   0.00000   0.00000   0.00000   0.00000   1.89316
   A13        1.88767   0.00000   0.00000   0.00000   0.00000   1.88767
    D1       -3.12755   0.00000   0.00000  -0.00001  -0.00001  -3.12756
    D2       -1.11134   0.00000   0.00000  -0.00001  -0.00001  -1.11135
    D3        1.05305   0.00000   0.00000  -0.00001  -0.00001   1.05304
    D4        1.03915   0.00000   0.00000   0.00001   0.00001   1.03916
    D5        3.12434   0.00000   0.00000   0.00000   0.00000   3.12434
    D6       -1.06074   0.00000   0.00000   0.00001   0.00001  -1.06074
    D7       -1.02560   0.00000   0.00000   0.00000   0.00000  -1.02560
    D8        1.05958   0.00000   0.00000   0.00000   0.00000   1.05958
    D9       -3.12550   0.00000   0.00000   0.00000   0.00000  -3.12549
   D10        3.08949   0.00000   0.00000   0.00001   0.00001   3.08950
   D11       -1.10851   0.00000   0.00000   0.00001   0.00001  -1.10850
   D12        0.98960   0.00000   0.00000   0.00001   0.00001   0.98960
         Item               Value     Threshold  Converged?
 Maximum Force            0.000001     0.000015     YES
 RMS     Force            0.000000     0.000010     YES
 Maximum Displacement     0.000014     0.000060     YES
 RMS     Displacement     0.000004     0.000040     YES
 Predicted change in Energy=-3.897881D-12
 Optimization completed.
    -- Stationary point found.
                           ----------------------------
                           !   Optimized Parameters   !
                           ! (Angstroms and Degrees)  !
 --------------------------                            --------------------------
 ! Name  Definition              Value          Derivative Info.                !
 --------------------------------------------------------------------------------
 ! R1    R(1,2)                  1.0909         -DE/DX =    0.0                 !
 ! R2    R(1,3)                  1.0978         -DE/DX =    0.0                 !
 ! R3    R(1,4)                  1.4281         -DE/DX =    0.0                 !
 ! R4    R(1,6)                  1.5215         -DE/DX =    0.0                 !
 ! R5    R(4,5)                  0.9637         -DE/DX =    0.0                 !
 ! R6    R(6,7)                  1.0932         -DE/DX =    0.0                 !
 ! R7    R(6,8)                  1.0941         -DE/DX =    0.0                 !
 ! R8    R(6,9)                  1.0914         -DE/DX =    0.0                 !
 ! A1    A(2,1,3)              107.2806         -DE/DX =    0.0                 !
 ! A2    A(2,1,4)              105.2098         -DE/DX =    0.0                 !
 ! A3    A(2,1,6)              110.3722         -DE/DX =    0.0                 !
 ! A4    A(3,1,4)              110.5699         -DE/DX =    0.0                 !
 ! A5    A(3,1,6)              110.1839         -DE/DX =    0.0                 !
 ! A6    A(4,1,6)              112.9717         -DE/DX =    0.0                 !
 ! A7    A(1,4,5)              108.375          -DE/DX =    0.0                 !
 ! A8    A(1,6,7)              110.7189         -DE/DX =    0.0                 !
 ! A9    A(1,6,8)              111.1629         -DE/DX =    0.0                 !
 ! A10   A(1,6,9)              110.6737         -DE/DX =    0.0                 !
 ! A11   A(7,6,8)              107.5431         -DE/DX =    0.0                 !
 ! A12   A(7,6,9)              108.4701         -DE/DX =    0.0                 !
 ! A13   A(8,6,9)              108.1556         -DE/DX =    0.0                 !
 ! D1    D(2,1,4,5)           -179.1954         -DE/DX =    0.0                 !
 ! D2    D(3,1,4,5)            -63.6753         -DE/DX =    0.0                 !
 ! D3    D(6,1,4,5)             60.3355         -DE/DX =    0.0                 !
 ! D4    D(2,1,6,7)             59.5391         -DE/DX =    0.0                 !
 ! D5    D(2,1,6,8)            179.0113         -DE/DX =    0.0                 !
 ! D6    D(2,1,6,9)            -60.7761         -DE/DX =    0.0                 !
 ! D7    D(3,1,6,7)            -58.7626         -DE/DX =    0.0                 !
 ! D8    D(3,1,6,8)             60.7096         -DE/DX =    0.0                 !
 ! D9    D(3,1,6,9)           -179.0778         -DE/DX =    0.0                 !
 ! D10   D(4,1,6,7)            177.0149         -DE/DX =    0.0                 !
 ! D11   D(4,1,6,8)            -63.5129         -DE/DX =    0.0                 !
 ! D12   D(4,1,6,9)             56.6997         -DE/DX =    0.0                 !
 --------------------------------------------------------------------------------
 GradGradGradGradGradGradGradGradGradGradGradGradGradGradGradGradGradGrad

 1\1\RECHENZENTRUM RWTH AACHEN-SRVMBFD\Freq\RB3LYP\TZVP\C2H6O1\JENS\29-
 Jun-2012\0\\#N Geom=AllCheck Guess=Read SCRF=Check GenChk RB3LYP/TZVP 
 Freq\\Title Card Required\\0,1\C,-0.0174743451,0.0015685798,-0.0261182
 005\H,-0.0346647264,-0.0475782084,1.0634902484\H,1.0357366926,0.014806
 7658,-0.3353672935\O,-0.6543688196,-1.1988206641,-0.4654125342\H,-0.65
 26796995,-1.2084880537,-1.4290662158\C,-0.7227434452,1.2595619547,-0.5
 107521153\H,-0.2369750478,2.1536254333,-0.1110656862\H,-0.6978454893,1
 .33074174,-1.6022157425\H,-1.7670438809,1.2623409731,-0.1934938164\\Ve
 rsion=AM64L-G03RevE.01\State=1-A\HF=-155.104147\RMSD=6.799e-10\RMSF=1.
 607e-07\ZeroPoint=0.0798215\Thermal=0.0840784\Dipole=0.2478952,0.53573
 45,-0.3990577\DipoleDeriv=0.4908441,0.1207777,0.0548187,0.1356731,0.80
 80386,0.1110646,0.0672452,0.150594,0.3444659,0.0473611,-0.0077611,0.00
 967,-0.0002114,-0.0070173,0.0185199,-0.028195,0.0067128,-0.1537339,-0.
 2336595,-0.0234974,0.0208209,-0.0138914,-0.0518203,-0.0172595,0.076847
 3,-0.0024837,0.0175641,-0.6021043,-0.0944654,-0.0888191,-0.0727766,-0.
 9266599,-0.1583198,-0.1118007,-0.2257392,-0.3157487,0.3162184,-0.06204
 01,0.0237899,-0.0487161,0.297049,0.086833,0.0108666,0.0387195,0.105205
 8,0.0329259,0.082763,-0.0353718,0.0541631,-0.1020722,0.0116631,-0.0171
 237,0.0596697,0.1024649,0.0183147,-0.0835288,-0.0455983,-0.0564515,-0.
 1028295,-0.0505014,-0.04563,-0.071598,0.0372024,0.0546238,0.0296527,0.
 01823,0.0137013,0.036645,-0.0194301,-0.0103536,0.026511,-0.1770582,-0.
 1245242,0.0380994,0.0424597,-0.0114905,0.0486666,0.0174303,0.0581439,0
 .017614,0.0396377\Polar=29.0062622,0.1254573,32.0668252,0.8652281,0.53
 03458,30.2411219\PG=C01 [X(C2H6O1)]\NImag=0\\0.54422587,-0.00643044,0.
 42644459,-0.03177529,-0.01118345,0.61513393,-0.05347314,0.00059261,0.0
 1707886,0.05371733,0.00014940,-0.04795598,0.02434688,0.00411082,0.0629
 5337,0.00956045,0.01550356,-0.30839771,-0.00623692,-0.01194952,0.33566
 625,-0.26551964,0.00786035,0.07038814,-0.00042340,0.00095732,0.0020088
 4,0.29475534,0.00827773,-0.04842674,-0.00316574,-0.00160288,0.00189564
 ,0.00146111,0.00108245,0.06204443,0.07341076,-0.00050615,-0.08064642,0
 .03066614,-0.00084109,-0.00878731,-0.07452826,0.00278282,0.07609029,-0
 .09746333,-0.06055205,-0.00514075,-0.00002492,-0.00429491,-0.00377512,
 -0.01503467,-0.03755801,-0.01529681,0.11102970,-0.05767153,-0.16440927
 ,-0.00794510,-0.00414629,-0.00720372,-0.00743390,-0.01494842,-0.013528
 26,-0.00482147,0.11204578,0.26360755,-0.02600185,-0.05022186,-0.105129
 43,-0.02076552,-0.03793264,-0.01334305,-0.00252030,0.00311853,0.006388
 24,0.02460041,0.04989314,0.61337615,-0.00202418,-0.00287241,-0.0223411
 1,-0.00111270,-0.00308184,-0.00099276,0.00001108,0.00042098,-0.0012757
 9,-0.01192462,-0.01584274,0.02076264,0.01474166,-0.00188682,-0.0050025
 5,-0.04078116,-0.00303265,-0.00500935,-0.00188084,-0.00027004,0.000794
 92,0.00050939,-0.01670473,-0.03362546,0.02943079,0.02114262,0.04189386
 ,0.00165666,0.00357620,-0.01526979,-0.00230791,-0.00290640,0.00178061,
 0.00030371,0.00152161,0.00119884,-0.00363338,-0.01535540,-0.50957643,0
 .00229929,0.01251659,0.51928087,-0.11524038,0.05100801,-0.02124557,0.0
 0083295,-0.00049182,0.00058620,-0.01446027,0.02836019,-0.01148639,0.01
 002499,-0.02190121,0.00358252,0.00041634,0.00052956,0.00138208,0.55374
 499,0.04453849,-0.13935480,0.02883679,0.00247238,-0.00203319,0.0023318
 3,0.00244018,-0.00001269,0.00212898,0.00573486,-0.04394182,0.00449810,
 0.00010046,0.00142369,0.00074225,0.03988017,0.49856892,-0.02030198,0.0
 3676671,-0.10009931,-0.01694190,0.02903427,-0.00902081,0.00599115,-0.0
 0809091,0.00418759,0.00243404,-0.01717659,0.00468374,0.00141492,-0.002
 07415,0.00315358,-0.01326438,0.02529978,0.55274297,0.00739972,0.010990
 73,0.00774545,0.00048637,-0.00058154,0.00005885,0.00004924,-0.00091975
 ,0.00041425,0.00043376,0.00432249,-0.00092919,-0.00030669,-0.00002651,
 -0.00026232,-0.09985063,-0.09432243,-0.04389863,0.10397387,-0.01608517
 ,-0.01754423,-0.01265398,-0.00035143,0.00078938,0.00069891,0.00092827,
 0.00092044,-0.00025859,0.00316110,-0.00747852,0.00170464,0.00002515,0.
 00050207,0.00089703,-0.09317162,-0.21912626,-0.07736172,0.10375373,0.2
 3890005,0.00650461,0.00744363,0.00321083,0.00042908,-0.00057682,0.0001
 6916,0.00012282,-0.00040969,0.00022679,-0.00060675,0.00327419,0.001040
 25,-0.00030535,0.00083751,-0.00006084,-0.04398894,-0.07823395,-0.08180
 656,0.04858451,0.08549948,0.08526153,-0.00012270,0.00034441,-0.0188361
 5,-0.00059847,0.00342454,-0.00078762,0.00053107,-0.00092474,-0.0001740
 7,-0.00021693,-0.00143422,0.00089700,0.00052641,0.00011713,0.00055420,
 -0.04871244,0.00036102,0.00949137,-0.00016097,0.00152230,-0.01453945,0
 .04817835,-0.00084160,-0.00288612,0.03105203,0.00286764,-0.00451109,0.
 00158627,-0.00073759,0.00099932,-0.00097752,-0.00002255,0.00329402,-0.
 00025736,-0.00019705,-0.00072416,-0.00082167,-0.00048781,-0.04830985,0
 .01291952,0.00179939,0.00223282,-0.02694692,-0.00223165,0.05093338,-0.
 00047160,-0.00088929,-0.01239780,-0.00156964,0.00166235,0.00128564,-0.
 00055685,0.00024187,0.00089593,0.00090354,0.00048687,0.00292592,0.0000
 8863,0.00126242,-0.00035131,0.00867509,0.01363080,-0.30160704,0.000556
 99,0.00050409,-0.01128472,-0.00780904,-0.01694314,0.32948160,-0.017782
 22,-0.00094122,0.00412642,0.00059599,-0.00019197,-0.00042193,0.0000912
 4,0.00286404,-0.00172983,0.00317603,-0.00042387,0.00037428,-0.00032730
 ,0.00013144,0.00000767,-0.28675555,-0.00120512,0.07507541,-0.01202466,
 0.00021766,0.00379947,0.00057568,-0.00014880,0.00018289,0.31245080,0.0
 2994994,-0.00086488,-0.00850626,-0.00091020,0.00107495,-0.00031741,0.0
 0268748,-0.00468705,0.00198362,-0.00180950,0.00328549,-0.00023334,0.00
 030481,-0.00025301,-0.00017020,-0.00372548,-0.04721398,0.00068310,-0.0
 2501611,0.00080425,0.00911257,-0.00117878,-0.00102831,0.00004402,-0.00
 030216,0.04888256,-0.01258177,-0.00048935,0.00359572,-0.00035220,-0.00
 083703,0.00064722,-0.00120926,0.00254039,0.00044605,0.00051482,-0.0009
 2172,-0.00036540,0.00034954,0.00017945,-0.00015552,0.07575940,0.000765
 42,-0.07223415,-0.01226991,0.00097015,0.00324356,0.03120376,0.00038879
 ,-0.00894822,-0.08141438,-0.00259610,0.07377075\\-0.00000003,-0.000000
 23,-0.00000019,0.00000004,-0.00000002,0.00000013,0.00000018,-0.0000001
 4,0.00000020,0.00000002,-0.00000029,0.00000018,0.00000012,-0.00000010,
 0.00000006,-0.00000008,0.00000045,0.00000002,-0.00000021,0.00000020,-0
 .00000013,0.,0.00000008,-0.00000014,-0.00000003,0.00000005,-0.00000012
 \\\@


 GARBAGE IN, GARBAGE OUT
 Job cpu time:  0 days  0 hours  5 minutes 57.7 seconds.
 File lengths (MBytes):  RWF=     23 Int=      0 D2E=      0 Chk=     10 Scr=      1
 Normal termination of Gaussian 03 at Fri Jun 29 10:03:30 2012.
