# Supplementary material for: CO from CO2and fluctuating renewable energy via formic-acid derivatives
Source: Royal Society of Chemistry journal article supplement (doi:10.1039/c6gc01202g), 2016-01-01
Supplement: c6gc01202g12.log [file c6gc01202g12.log]

 Entering Gaussian System, Link 0=/opt/mbfd/GAUSSIAN/LINUX64/g03.e01/g03
 Input=H2O_geoopt_B3LYP_TZVP.com
 Output=H2O_geoopt_B3LYP_TZVP.log
 Initial command:
 /opt/mbfd/GAUSSIAN/LINUX64/g03.e01/l1.exe /gaussianscratch/Gau-9718.inp -scrdir=/gaussianscratch/
 Entering Link 1 = /opt/mbfd/GAUSSIAN/LINUX64/g03.e01/l1.exe PID=      9719.
  
 Copyright (c) 1988,1990,1992,1993,1995,1998,2003,2004,2007, Gaussian, Inc.
                  All Rights Reserved.
  
 This is the Gaussian(R) 03 program.  It is based on the
 the Gaussian(R) 98 system (copyright 1998, Gaussian, Inc.),
 the Gaussian(R) 94 system (copyright 1995, Gaussian, Inc.),
 the Gaussian 92(TM) system (copyright 1992, Gaussian, Inc.),
 the Gaussian 90(TM) system (copyright 1990, Gaussian, Inc.),
 the Gaussian 88(TM) system (copyright 1988, Gaussian, Inc.),
 the Gaussian 86(TM) system (copyright 1986, Carnegie Mellon
 University), and the Gaussian 82(TM) system (copyright 1983,
 Carnegie Mellon University). Gaussian is a federally registered
 trademark of Gaussian, Inc.
  
 This software contains proprietary and confidential information,
 including trade secrets, belonging to Gaussian, Inc.
  
 This software is provided under written license and may be
 used, copied, transmitted, or stored only in accord with that
 written license.
  
 The following legend is applicable only to US Government
 contracts under FAR:
  
                    RESTRICTED RIGHTS LEGEND
  
 Use, reproduction and disclosure by the US Government is
 subject to restrictions as set forth in subparagraphs (a)
 and (c) of the Commercial Computer Software - Restricted
 Rights clause in FAR 52.227-19.
  
 Gaussian, Inc.
 340 Quinnipiac St., Bldg. 40, Wallingford CT 06492
  
  
 ---------------------------------------------------------------
 Warning -- This program may not be used in any manner that
 competes with the business of Gaussian, Inc. or will provide
 assistance to any competitor of Gaussian, Inc.  The licensee
 of this program is prohibited from giving any competitor of
 Gaussian, Inc. access to this program.  By using this program,
 the user acknowledges that Gaussian, Inc. is engaged in the
 business of creating and licensing software in the field of
 computational chemistry and represents and warrants to the
 licensee that it is not a competitor of Gaussian, Inc. and that
 it will not use this program in any manner prohibited above.
 ---------------------------------------------------------------
  

 Cite this work as:
 Gaussian 03, Revision E.01,
 M. J. Frisch, G. W. Trucks, H. B. Schlegel, G. E. Scuseria, 
 M. A. Robb, J. R. Cheeseman, J. A. Montgomery, Jr., T. Vreven, 
 K. N. Kudin, J. C. Burant, J. M. Millam, S. S. Iyengar, J. Tomasi, 
 V. Barone, B. Mennucci, M. Cossi, G. Scalmani, N. Rega, 
 G. A. Petersson, H. Nakatsuji, M. Hada, M. Ehara, K. Toyota, 
 R. Fukuda, J. Hasegawa, M. Ishida, T. Nakajima, Y. Honda, O. Kitao, 
 H. Nakai, M. Klene, X. Li, J. E. Knox, H. P. Hratchian, J. B. Cross, 
 V. Bakken, C. Adamo, J. Jaramillo, R. Gomperts, R. E. Stratmann, 
 O. Yazyev, A. J. Austin, R. Cammi, C. Pomelli, J. W. Ochterski, 
 P. Y. Ayala, K. Morokuma, G. A. Voth, P. Salvador, J. J. Dannenberg, 
 V. G. Zakrzewski, S. Dapprich, A. D. Daniels, M. C. Strain, 
 O. Farkas, D. K. Malick, A. D. Rabuck, K. Raghavachari, 
 J. B. Foresman, J. V. Ortiz, Q. Cui, A. G. Baboul, S. Clifford, 
 J. Cioslowski, B. B. Stefanov, G. Liu, A. Liashenko, P. Piskorz, 
 I. Komaromi, R. L. Martin, D. J. Fox, T. Keith, M. A. Al-Laham, 
 C. Y. Peng, A. Nanayakkara, M. Challacombe, P. M. W. Gill, 
 B. Johnson, W. Chen, M. W. Wong, C. Gonzalez, and J. A. Pople, 
 Gaussian, Inc., Wallingford CT, 2004.
 
 ******************************************
 Gaussian 03:  AM64L-G03RevE.01 11-Sep-2007
                 3-Jul-2014 
 ******************************************
 %chk=H2O_geoopt_B3LYP_TZVP.chk
 Default route: MaxDisk=200000000
 --------------------------------
 # opt=(tight,calcall) b3lyp tzvp
 --------------------------------
 1/7=10,10=4,14=-1,18=20,26=3,38=1/1,3;
 2/9=110,17=6,18=5,40=1/2;
 3/5=19,7=101,11=2,16=1,25=1,30=1,74=-5/1,2,3;
 4//1;
 5/5=2,38=5/2;
 8/6=4,10=90,11=11/1;
 11/6=1,8=1,9=11,15=111,16=1/1,2,10;
 10/6=1/2;
 6/7=2,8=2,9=2,10=2,18=1,28=1/1;
 7/10=1,25=1/1,2,3,16;
 1/10=4,14=-1,18=20/3(3);
 2/9=110/2;
 7/8=1,9=1,25=1,44=-1/16;
 99//99;
 2/9=110/2;
 3/5=19,7=101,11=2,16=1,25=1,30=1,74=-5/1,2,3;
 4/5=5,16=3/1;
 5/5=2,38=5/2;
 8/6=4,10=90,11=11/1;
 11/6=1,8=1,9=11,15=111,16=1/1,2,10;
 10/6=1/2;
 7/10=1,25=1/1,2,3,16;
 1/10=4,14=-1,18=20/3(-8);
 2/9=110/2;
 6/7=2,8=2,9=2,10=2,18=1,19=2,28=1/1;
 7/8=1,9=1,25=1,44=-1/16;
 99//99;
 -------------------
 Title Card Required
 -------------------
 Symbolic Z-matrix:
 Charge =  0 Multiplicity = 1
 O                    -2.41176   1.73529   0. 
 H                    -1.45176   1.73529   0. 
 H                    -2.73222   2.64023   0. 
 

 GradGradGradGradGradGradGradGradGradGradGradGradGradGradGradGradGradGrad
 Berny optimization.
 Initialization pass.
                           ----------------------------
                           !    Initial Parameters    !
                           ! (Angstroms and Degrees)  !
 --------------------------                            --------------------------
 ! Name  Definition              Value          Derivative Info.                !
 --------------------------------------------------------------------------------
 ! R1    R(1,2)                  0.96           calculate D2E/DX2 analytically  !
 ! R2    R(1,3)                  0.96           calculate D2E/DX2 analytically  !
 ! A1    A(2,1,3)              109.5            calculate D2E/DX2 analytically  !
 --------------------------------------------------------------------------------
 Trust Radius=3.00D-01 FncErr=1.00D-07 GrdErr=1.00D-06
 Number of steps in this run=  20 maximum allowed number of steps= 100.
 GradGradGradGradGradGradGradGradGradGradGradGradGradGradGradGradGradGrad

                          Input orientation:                          
 ---------------------------------------------------------------------
 Center     Atomic     Atomic              Coordinates (Angstroms)
 Number     Number      Type              X           Y           Z
 ---------------------------------------------------------------------
    1          8             0       -2.411765    1.735294    0.000000
    2          1             0       -1.451765    1.735294    0.000000
    3          1             0       -2.732219    2.640230    0.000000
 ---------------------------------------------------------------------
                    Distance matrix (angstroms):
                    1          2          3
     1  O    0.000000
     2  H    0.960000   0.000000
     3  H    0.960000   1.567952   0.000000
 Stoichiometry    H2O
 Framework group  C2V[C2(O),SGV(H2)]
 Deg. of freedom     2
 Full point group                 C2V
 Largest Abelian subgroup         C2V     NOp   4
 Largest concise Abelian subgroup C2      NOp   2
                         Standard orientation:                         
 ---------------------------------------------------------------------
 Center     Atomic     Atomic              Coordinates (Angstroms)
 Number     Number      Type              X           Y           Z
 ---------------------------------------------------------------------
    1          8             0        0.000000    0.000000    0.110812
    2          1             0        0.000000    0.783976   -0.443248
    3          1             0        0.000000   -0.783976   -0.443248
 ---------------------------------------------------------------------
 Rotational constants (GHZ):    919.6759621    407.9403280    282.5913756
 Standard basis: TZVP (5D, 7F)
 There are    15 symmetry adapted basis functions of A1  symmetry.
 There are     2 symmetry adapted basis functions of A2  symmetry.
 There are     5 symmetry adapted basis functions of B1  symmetry.
 There are     9 symmetry adapted basis functions of B2  symmetry.
 Integral buffers will be    131072 words long.
 Raffenetti 2 integral format.
 Two-electron integral symmetry is turned on.
    31 basis functions,    51 primitive gaussians,    32 cartesian basis functions
     5 alpha electrons        5 beta electrons
       nuclear repulsion energy         9.1571159850 Hartrees.
 NAtoms=    3 NActive=    3 NUniq=    2 SFac= 1.69D+00 NAtFMM=   80 NAOKFM=F Big=F
 One-electron integrals computed using PRISM.
 NBasis=    31 RedAO= T  NBF=    15     2     5     9
 NBsUse=    31 1.00D-06 NBFU=    15     2     5     9
 Harris functional with IExCor=  402 diagonalized for initial guess.
 ExpMin= 1.03D-01 ExpMax= 2.70D+04 ExpMxC= 9.22D+02 IAcc=1 IRadAn=         1 AccDes= 1.00D-06
 HarFok:  IExCor= 402 AccDes= 1.00D-06 IRadAn=         1 IDoV=1
 ScaDFX=  1.000000  1.000000  1.000000  1.000000
 Initial guess orbital symmetries:
       Occupied  (A1) (A1) (B2) (A1) (B1)
       Virtual   (A1) (B2) (B2) (A1) (B1) (A1) (B2) (A1) (A2) (A1)
                 (B1) (B2) (B2) (A1) (A1) (B2) (B1) (A1) (B2) (A1)
                 (B1) (A2) (A1) (A1) (B2) (A1)
 The electronic state of the initial guess is 1-A1.
 Requested convergence on RMS density matrix=1.00D-08 within 128 cycles.
 Requested convergence on MAX density matrix=1.00D-06.
 Requested convergence on             energy=1.00D-06.
 No special actions if energy rises.
 Keep R1 integrals in memory in canonical form, NReq=     1864285.
 Integral accuracy reduced to 1.0D-05 until final iterations.
 Initial convergence to 1.0D-05 achieved.  Increase integral accuracy.
 SCF Done:  E(RB+HF-LYP) =  -76.4601736772     A.U. after    9 cycles
             Convg  =    0.6743D-08             -V/T =  2.0037
             S**2   =   0.0000
 Range of M.O.s used for correlation:     1    31
 NBasis=    31 NAE=     5 NBE=     5 NFC=     0 NFV=     0
 NROrb=     31 NOA=     5 NOB=     5 NVA=    26 NVB=    26
 Symmetrizing basis deriv contribution to polar:
 IMax=3 JMax=2 DiffMx= 0.00D+00
 G2DrvN: will do    4 centers at a time, making    1 passes doing MaxLOS=2.
 FoFDir/FoFCou used for L=0 through L=2.
 DoAtom=TTT
          Differentiating once with respect to electric field.
                with respect to dipole field.
          Differentiating once with respect to nuclear coordinates.
          Store integrals in memory, NReq=      960153.
          There are   9 degrees of freedom in the 1st order CPHF.
     9 vectors were produced by pass  0.
 AX will form   9 AO Fock derivatives at one time.
     9 vectors were produced by pass  1.
     9 vectors were produced by pass  2.
     9 vectors were produced by pass  3.
     8 vectors were produced by pass  4.
     4 vectors were produced by pass  5.
     1 vectors were produced by pass  6.
 Inv2:  IOpt= 1 Iter= 1 AM= 6.91D-16 Conv= 1.00D-12.
 Inverted reduced A of dimension   49 with in-core refinement.
 Isotropic polarizability for W=    0.000000        6.38 Bohr**3.
 End of Minotr Frequency-dependent properties file   721 does not exist.

 **********************************************************************

            Population analysis using the SCF density.

 **********************************************************************

 Orbital symmetries:
       Occupied  (A1) (A1) (B2) (A1) (B1)
       Virtual   (A1) (B2) (B2) (A1) (B1) (A1) (B2) (A1) (A2) (A1)
                 (B1) (B2) (B2) (A1) (A1) (B2) (B1) (A1) (B2) (A1)
                 (B1) (A2) (A1) (A1) (B2) (A1)
 The electronic state is 1-A1.
 Alpha  occ. eigenvalues --  -19.12490  -1.01391  -0.54545  -0.38150  -0.31495
 Alpha virt. eigenvalues --    0.01366   0.08860   0.37189   0.39849   0.42512
 Alpha virt. eigenvalues --    0.43281   0.56931   0.59396   1.31634   1.35690
 Alpha virt. eigenvalues --    1.53842   1.66342   1.96882   1.99114   2.24123
 Alpha virt. eigenvalues --    2.31192   2.54303   2.60936   2.79717   2.90007
 Alpha virt. eigenvalues --    2.93110   3.00936   3.18540   4.06984   4.43903
 Alpha virt. eigenvalues --   43.11975
          Condensed to atoms (all electrons):
              1          2          3
     1  O    7.923763   0.313101   0.313101
     2  H    0.313101   0.438922  -0.027006
     3  H    0.313101  -0.027006   0.438922
 Mulliken atomic charges:
              1
     1  O   -0.549965
     2  H    0.274983
     3  H    0.274983
 Sum of Mulliken charges=   0.00000
 Atomic charges with hydrogens summed into heavy atoms:
              1
     1  O    0.000000
     2  H    0.000000
     3  H    0.000000
 Sum of Mulliken charges=   0.00000
 APT atomic charges:
              1
     1  O   -0.557849
     2  H    0.278925
     3  H    0.278925
 Sum of APT charges=   0.00000
 APT Atomic charges with hydrogens summed into heavy atoms:
              1
     1  O    0.000000
     2  H    0.000000
     3  H    0.000000
 Sum of APT charges=   0.00000
 Electronic spatial extent (au):  <R**2>=    19.6949
 Charge=     0.0000 electrons
 Dipole moment (field-independent basis, Debye):
    X=     0.0000    Y=     0.0000    Z=    -2.0768  Tot=     2.0768
 Quadrupole moment (field-independent basis, Debye-Ang):
   XX=    -7.5687   YY=    -4.1652   ZZ=    -6.4931
   XY=     0.0000   XZ=     0.0000   YZ=     0.0000
 Traceless Quadrupole moment (field-independent basis, Debye-Ang):
   XX=    -1.4930   YY=     1.9105   ZZ=    -0.4174
   XY=     0.0000   XZ=     0.0000   YZ=     0.0000
 Octapole moment (field-independent basis, Debye-Ang**2):
  XXX=     0.0000  YYY=     0.0000  ZZZ=    -1.3244  XYY=     0.0000
  XXY=     0.0000  XXZ=    -0.3866  XZZ=     0.0000  YZZ=     0.0000
  YYZ=    -1.3053  XYZ=     0.0000
 Hexadecapole moment (field-independent basis, Debye-Ang**3):
 XXXX=    -6.5143 YYYY=    -6.1873 ZZZZ=    -7.2778 XXXY=     0.0000
 XXXZ=     0.0000 YYYX=     0.0000 YYYZ=     0.0000 ZZZX=     0.0000
 ZZZY=     0.0000 XXYY=    -2.4394 XXZZ=    -2.3417 YYZZ=    -1.9884
 XXYZ=     0.0000 YYXZ=     0.0000 ZZXY=     0.0000
 N-N= 9.157115984955D+00 E-N=-1.992236789625D+02  KE= 7.617665796208D+01
 Symmetry A1   KE= 6.797352705652D+01
 Symmetry A2   KE= 2.193504890575D-34
 Symmetry B1   KE= 4.560780800713D+00
 Symmetry B2   KE= 3.642350104851D+00
  Exact polarizability:   4.887   0.000   8.084   0.000   0.000   6.166
 Approx polarizability:   5.099   0.000   9.957   0.000   0.000   7.146
 ***** Axes restored to original set *****
 -------------------------------------------------------------------
 Center     Atomic                   Forces (Hartrees/Bohr)
 Number     Number              X              Y              Z
 -------------------------------------------------------------------
    1          8          -0.006150770   -0.008703138    0.000000000
    2          1           0.000465329    0.006196174    0.000000000
    3          1           0.005685441    0.002506964    0.000000000
 -------------------------------------------------------------------
 Cartesian Forces:  Max     0.008703138 RMS     0.004604283

 GradGradGradGradGradGradGradGradGradGradGradGradGradGradGradGradGradGrad
 Berny optimization.
 Internal  Forces:  Max     0.011240709 RMS     0.006500939
 Search for a local minimum.
 Step number   1 out of a maximum of  20
 All quantities printed in internal units (Hartrees-Bohrs-Radians)
 Second derivative matrix not updated -- analytic derivatives used.
 The second derivative matrix:
                          R1        R2        A1
           R1           0.54108
           R2          -0.00871   0.54108
           A1           0.02770   0.02770   0.14093
     Eigenvalues ---    0.13704   0.53625   0.54978
 RFO step:  Lambda=-9.17899788D-04.
 Linear search not attempted -- first point.
 Iteration  1 RMS(Cart)=  0.04320545 RMS(Int)=  0.00122805
 Iteration  2 RMS(Cart)=  0.00113930 RMS(Int)=  0.00000013
 Iteration  3 RMS(Cart)=  0.00000012 RMS(Int)=  0.00000000
 Variable       Old X    -DE/DX   Delta X   Delta X   Delta X     New X
                                 (Linear)    (Quad)   (Total)
    R1        1.81414   0.00047   0.00000   0.00509   0.00509   1.81923
    R2        1.81414   0.00047   0.00000   0.00509   0.00509   1.81923
    A1        1.91114  -0.01124   0.00000  -0.08124  -0.08124   1.82990
         Item               Value     Threshold  Converged?
 Maximum Force            0.011241     0.000015     NO 
 RMS     Force            0.006501     0.000010     NO 
 Maximum Displacement     0.044428     0.000060     NO 
 RMS     Displacement     0.043774     0.000040     NO 
 Predicted change in Energy=-4.620024D-04
 GradGradGradGradGradGradGradGradGradGradGradGradGradGradGradGradGradGrad

                          Input orientation:                          
 ---------------------------------------------------------------------
 Center     Atomic     Atomic              Coordinates (Angstroms)
 Number     Number      Type              X           Y           Z
 ---------------------------------------------------------------------
    1          8             0       -2.424470    1.717316    0.000000
    2          1             0       -1.462569    1.756409    0.000000
    3          1             0       -2.708709    2.637093    0.000000
 ---------------------------------------------------------------------
                    Distance matrix (angstroms):
                    1          2          3
     1  O    0.000000
     2  H    0.962695   0.000000
     3  H    0.962695   1.525932   0.000000
 Stoichiometry    H2O
 Framework group  C2V[C2(O),SGV(H2)]
 Deg. of freedom     2
 Full point group                 C2V
 Largest Abelian subgroup         C2V     NOp   4
 Largest concise Abelian subgroup C2      NOp   2
                         Standard orientation:                         
 ---------------------------------------------------------------------
 Center     Atomic     Atomic              Coordinates (Angstroms)
 Number     Number      Type              X           Y           Z
 ---------------------------------------------------------------------
    1          8             0        0.000000    0.000000    0.117416
    2          1             0        0.000000    0.762966   -0.469665
    3          1             0        0.000000   -0.762966   -0.469665
 ---------------------------------------------------------------------
 Rotational constants (GHZ):    819.1274712    430.7164187    282.2845746
 Standard basis: TZVP (5D, 7F)
 There are    15 symmetry adapted basis functions of A1  symmetry.
 There are     2 symmetry adapted basis functions of A2  symmetry.
 There are     5 symmetry adapted basis functions of B1  symmetry.
 There are     9 symmetry adapted basis functions of B2  symmetry.
 Integral buffers will be    131072 words long.
 Raffenetti 2 integral format.
 Two-electron integral symmetry is turned on.
    31 basis functions,    51 primitive gaussians,    32 cartesian basis functions
     5 alpha electrons        5 beta electrons
       nuclear repulsion energy         9.1417203674 Hartrees.
 NAtoms=    3 NActive=    3 NUniq=    2 SFac= 1.69D+00 NAtFMM=   80 NAOKFM=F Big=F
 One-electron integrals computed using PRISM.
 NBasis=    31 RedAO= T  NBF=    15     2     5     9
 NBsUse=    31 1.00D-06 NBFU=    15     2     5     9
 Initial guess read from the read-write file:
 Initial guess orbital symmetries:
       Occupied  (A1) (A1) (B2) (A1) (B1)
       Virtual   (A1) (B2) (B2) (A1) (B1) (A1) (B2) (A1) (A2) (A1)
                 (B1) (B2) (B2) (A1) (A1) (B2) (B1) (A1) (B2) (A1)
                 (B1) (A2) (A1) (A1) (B2) (A1)
 Harris functional with IExCor=  402 diagonalized for initial guess.
 ExpMin= 1.03D-01 ExpMax= 2.70D+04 ExpMxC= 9.22D+02 IAcc=1 IRadAn=         1 AccDes= 1.00D-06
 HarFok:  IExCor= 402 AccDes= 1.00D-06 IRadAn=         1 IDoV=1
 ScaDFX=  1.000000  1.000000  1.000000  1.000000
 Requested convergence on RMS density matrix=1.00D-08 within 128 cycles.
 Requested convergence on MAX density matrix=1.00D-06.
 Requested convergence on             energy=1.00D-06.
 No special actions if energy rises.
 Keep R1 integrals in memory in canonical form, NReq=     1864285.
 Integral accuracy reduced to 1.0D-05 until final iterations.
 Initial convergence to 1.0D-05 achieved.  Increase integral accuracy.
 SCF Done:  E(RB+HF-LYP) =  -76.4606213244     A.U. after    9 cycles
             Convg  =    0.8921D-09             -V/T =  2.0037
             S**2   =   0.0000
 Range of M.O.s used for correlation:     1    31
 NBasis=    31 NAE=     5 NBE=     5 NFC=     0 NFV=     0
 NROrb=     31 NOA=     5 NOB=     5 NVA=    26 NVB=    26
 Symmetrizing basis deriv contribution to polar:
 IMax=3 JMax=2 DiffMx= 0.00D+00
 G2DrvN: will do    4 centers at a time, making    1 passes doing MaxLOS=2.
 FoFDir/FoFCou used for L=0 through L=2.
 DoAtom=TTT
          Differentiating once with respect to electric field.
                with respect to dipole field.
          Differentiating once with respect to nuclear coordinates.
          Store integrals in memory, NReq=      960153.
          There are   9 degrees of freedom in the 1st order CPHF.
     9 vectors were produced by pass  0.
 AX will form   9 AO Fock derivatives at one time.
     9 vectors were produced by pass  1.
     9 vectors were produced by pass  2.
     9 vectors were produced by pass  3.
     8 vectors were produced by pass  4.
     4 vectors were produced by pass  5.
     1 vectors were produced by pass  6.
 Inv2:  IOpt= 1 Iter= 1 AM= 9.30D-16 Conv= 1.00D-12.
 Inverted reduced A of dimension   49 with in-core refinement.
 Isotropic polarizability for W=    0.000000        6.45 Bohr**3.
 End of Minotr Frequency-dependent properties file   721 does not exist.
 ***** Axes restored to original set *****
 -------------------------------------------------------------------
 Center     Atomic                   Forces (Hartrees/Bohr)
 Number     Number              X              Y              Z
 -------------------------------------------------------------------
    1          8           0.000163390    0.000231192    0.000000000
    2          1           0.000109821   -0.000250946    0.000000000
    3          1          -0.000273211    0.000019755    0.000000000
 -------------------------------------------------------------------
 Cartesian Forces:  Max     0.000273211 RMS     0.000159936

 GradGradGradGradGradGradGradGradGradGradGradGradGradGradGradGradGradGrad
 Berny optimization.
 Internal  Forces:  Max     0.000464265 RMS     0.000280095
 Search for a local minimum.
 Step number   2 out of a maximum of  20
 All quantities printed in internal units (Hartrees-Bohrs-Radians)
 Second derivative matrix not updated -- analytic derivatives used.
 Trust test= 9.69D-01 RLast= 8.16D-02 DXMaxT set to 3.00D-01
 The second derivative matrix:
                          R1        R2        A1
           R1           0.53169
           R2          -0.00603   0.53169
           A1           0.02974   0.02974   0.15431
     Eigenvalues ---    0.14961   0.53037   0.53772
 RFO step:  Lambda=-4.96088373D-08.
 Quintic linear search produced a step of -0.03689.
 Iteration  1 RMS(Cart)=  0.00171213 RMS(Int)=  0.00000168
 Iteration  2 RMS(Cart)=  0.00000144 RMS(Int)=  0.00000000
 Iteration  3 RMS(Cart)=  0.00000000 RMS(Int)=  0.00000000
 Variable       Old X    -DE/DX   Delta X   Delta X   Delta X     New X
                                 (Linear)    (Quad)   (Total)
    R1        1.81923   0.00010  -0.00019   0.00022   0.00003   1.81926
    R2        1.81923   0.00010  -0.00019   0.00022   0.00003   1.81926
    A1        1.82990   0.00046   0.00300   0.00001   0.00301   1.83290
         Item               Value     Threshold  Converged?
 Maximum Force            0.000464     0.000015     NO 
 RMS     Force            0.000280     0.000010     NO 
 Maximum Displacement     0.001793     0.000060     NO 
 RMS     Displacement     0.001711     0.000040     NO 
 Predicted change in Energy=-6.985347D-07
 GradGradGradGradGradGradGradGradGradGradGradGradGradGradGradGradGradGrad

                          Input orientation:                          
 ---------------------------------------------------------------------
 Center     Atomic     Atomic              Coordinates (Angstroms)
 Number     Number      Type              X           Y           Z
 ---------------------------------------------------------------------
    1          8             0       -2.424032    1.717936    0.000000
    2          1             0       -1.462059    1.755583    0.000000
    3          1             0       -2.709658    2.637299    0.000000
 ---------------------------------------------------------------------
                    Distance matrix (angstroms):
                    1          2          3
     1  O    0.000000
     2  H    0.962710   0.000000
     3  H    0.962710   1.527720   0.000000
 Stoichiometry    H2O
 Framework group  C2V[C2(O),SGV(H2)]
 Deg. of freedom     2
 Full point group                 C2V
 Largest Abelian subgroup         C2V     NOp   4
 Largest concise Abelian subgroup C2      NOp   2
                         Standard orientation:                         
 ---------------------------------------------------------------------
 Center     Atomic     Atomic              Coordinates (Angstroms)
 Number     Number      Type              X           Y           Z
 ---------------------------------------------------------------------
    1          8             0        0.000000    0.000000    0.117189
    2          1             0        0.000000    0.763860   -0.468754
    3          1             0        0.000000   -0.763860   -0.468754
 ---------------------------------------------------------------------
 Rotational constants (GHZ):    822.3126496    429.7092488    282.2277720
 Standard basis: TZVP (5D, 7F)
 There are    15 symmetry adapted basis functions of A1  symmetry.
 There are     2 symmetry adapted basis functions of A2  symmetry.
 There are     5 symmetry adapted basis functions of B1  symmetry.
 There are     9 symmetry adapted basis functions of B2  symmetry.
 Integral buffers will be    131072 words long.
 Raffenetti 2 integral format.
 Two-electron integral symmetry is turned on.
    31 basis functions,    51 primitive gaussians,    32 cartesian basis functions
     5 alpha electrons        5 beta electrons
       nuclear repulsion energy         9.1411753879 Hartrees.
 NAtoms=    3 NActive=    3 NUniq=    2 SFac= 1.69D+00 NAtFMM=   80 NAOKFM=F Big=F
 One-electron integrals computed using PRISM.
 NBasis=    31 RedAO= T  NBF=    15     2     5     9
 NBsUse=    31 1.00D-06 NBFU=    15     2     5     9
 Initial guess read from the read-write file:
 Initial guess orbital symmetries:
       Occupied  (A1) (A1) (B2) (A1) (B1)
       Virtual   (A1) (B2) (B2) (A1) (B1) (A1) (B2) (A1) (A1) (A2)
                 (B1) (B2) (B2) (A1) (A1) (B2) (B1) (A1) (B2) (A1)
                 (B1) (A2) (A1) (A1) (B2) (A1)
 Requested convergence on RMS density matrix=1.00D-08 within 128 cycles.
 Requested convergence on MAX density matrix=1.00D-06.
 Requested convergence on             energy=1.00D-06.
 No special actions if energy rises.
 Keep R1 integrals in memory in canonical form, NReq=     1864285.
 SCF Done:  E(RB+HF-LYP) =  -76.4606220237     A.U. after    6 cycles
             Convg  =    0.1961D-08             -V/T =  2.0037
             S**2   =   0.0000
 Range of M.O.s used for correlation:     1    31
 NBasis=    31 NAE=     5 NBE=     5 NFC=     0 NFV=     0
 NROrb=     31 NOA=     5 NOB=     5 NVA=    26 NVB=    26
 Symmetrizing basis deriv contribution to polar:
 IMax=3 JMax=2 DiffMx= 0.00D+00
 G2DrvN: will do    4 centers at a time, making    1 passes doing MaxLOS=2.
 FoFDir/FoFCou used for L=0 through L=2.
 DoAtom=TTT
          Differentiating once with respect to electric field.
                with respect to dipole field.
          Differentiating once with respect to nuclear coordinates.
          Store integrals in memory, NReq=      960153.
          There are   9 degrees of freedom in the 1st order CPHF.
     9 vectors were produced by pass  0.
 AX will form   9 AO Fock derivatives at one time.
     9 vectors were produced by pass  1.
     9 vectors were produced by pass  2.
     9 vectors were produced by pass  3.
     8 vectors were produced by pass  4.
     4 vectors were produced by pass  5.
     1 vectors were produced by pass  6.
 Inv2:  IOpt= 1 Iter= 1 AM= 4.72D-16 Conv= 1.00D-12.
 Inverted reduced A of dimension   49 with in-core refinement.
 Isotropic polarizability for W=    0.000000        6.45 Bohr**3.
 End of Minotr Frequency-dependent properties file   721 does not exist.
 ***** Axes restored to original set *****
 -------------------------------------------------------------------
 Center     Atomic                   Forces (Hartrees/Bohr)
 Number     Number              X              Y              Z
 -------------------------------------------------------------------
    1          8           0.000003119    0.000004413    0.000000000
    2          1          -0.000004855    0.000000123    0.000000000
    3          1           0.000001736   -0.000004536    0.000000000
 -------------------------------------------------------------------
 Cartesian Forces:  Max     0.000004855 RMS     0.000002913

 GradGradGradGradGradGradGradGradGradGradGradGradGradGradGradGradGradGrad
 Berny optimization.
 Internal  Forces:  Max     0.000004847 RMS     0.000003971
 Search for a local minimum.
 Step number   3 out of a maximum of  20
 All quantities printed in internal units (Hartrees-Bohrs-Radians)
 Second derivative matrix not updated -- analytic derivatives used.
 Trust test= 1.00D+00 RLast= 3.01D-03 DXMaxT set to 3.00D-01
 The second derivative matrix:
                          R1        R2        A1
           R1           0.53161
           R2          -0.00613   0.53161
           A1           0.02964   0.02964   0.15382
     Eigenvalues ---    0.14915   0.53015   0.53775
 RFO step:  Lambda= 0.00000000D+00.
 Quintic linear search produced a step of -0.00142.
 Iteration  1 RMS(Cart)=  0.00000657 RMS(Int)=  0.00000000
 Iteration  2 RMS(Cart)=  0.00000000 RMS(Int)=  0.00000000
 Variable       Old X    -DE/DX   Delta X   Delta X   Delta X     New X
                                 (Linear)    (Quad)   (Total)
    R1        1.81926   0.00000   0.00000  -0.00001  -0.00001   1.81925
    R2        1.81926   0.00000   0.00000  -0.00001  -0.00001   1.81925
    A1        1.83290   0.00000   0.00000   0.00000   0.00000   1.83290
         Item               Value     Threshold  Converged?
 Maximum Force            0.000005     0.000015     YES
 RMS     Force            0.000004     0.000010     YES
 Maximum Displacement     0.000007     0.000060     YES
 RMS     Displacement     0.000007     0.000040     YES
 Predicted change in Energy=-4.470886D-11
 Optimization completed.
    -- Stationary point found.
                           ----------------------------
                           !   Optimized Parameters   !
                           ! (Angstroms and Degrees)  !
 --------------------------                            --------------------------
 ! Name  Definition              Value          Derivative Info.                !
 --------------------------------------------------------------------------------
 ! R1    R(1,2)                  0.9627         -DE/DX =    0.0                 !
 ! R2    R(1,3)                  0.9627         -DE/DX =    0.0                 !
 ! A1    A(2,1,3)              105.0177         -DE/DX =    0.0                 !
 --------------------------------------------------------------------------------
 GradGradGradGradGradGradGradGradGradGradGradGradGradGradGradGradGradGrad

                          Input orientation:                          
 ---------------------------------------------------------------------
 Center     Atomic     Atomic              Coordinates (Angstroms)
 Number     Number      Type              X           Y           Z
 ---------------------------------------------------------------------
    1          8             0       -2.424032    1.717936    0.000000
    2          1             0       -1.462059    1.755583    0.000000
    3          1             0       -2.709658    2.637299    0.000000
 ---------------------------------------------------------------------
                    Distance matrix (angstroms):
                    1          2          3
     1  O    0.000000
     2  H    0.962710   0.000000
     3  H    0.962710   1.527720   0.000000
 Stoichiometry    H2O
 Framework group  C2V[C2(O),SGV(H2)]
 Deg. of freedom     2
 Full point group                 C2V
 Largest Abelian subgroup         C2V     NOp   4
 Largest concise Abelian subgroup C2      NOp   2
                         Standard orientation:                         
 ---------------------------------------------------------------------
 Center     Atomic     Atomic              Coordinates (Angstroms)
 Number     Number      Type              X           Y           Z
 ---------------------------------------------------------------------
    1          8             0        0.000000    0.000000    0.117189
    2          1             0        0.000000    0.763860   -0.468754
    3          1             0        0.000000   -0.763860   -0.468754
 ---------------------------------------------------------------------
 Rotational constants (GHZ):    822.3126496    429.7092488    282.2277720

 **********************************************************************

            Population analysis using the SCF density.

 **********************************************************************

 Orbital symmetries:
       Occupied  (A1) (A1) (B2) (A1) (B1)
       Virtual   (A1) (B2) (B2) (A1) (B1) (A1) (B2) (A1) (A1) (A2)
                 (B1) (B2) (B2) (A1) (A1) (B2) (B1) (A1) (B2) (A1)
                 (B1) (A2) (A1) (A1) (B2) (A1)
 The electronic state is 1-A1.
 Alpha  occ. eigenvalues --  -19.12726  -1.01603  -0.53670  -0.38968  -0.31576
 Alpha virt. eigenvalues --    0.01256   0.08828   0.36245   0.40837   0.42478
 Alpha virt. eigenvalues --    0.43451   0.56842   0.59613   1.30075   1.32858
 Alpha virt. eigenvalues --    1.51626   1.69379   1.94818   1.99727   2.21740
 Alpha virt. eigenvalues --    2.32191   2.54121   2.61184   2.79736   2.90228
 Alpha virt. eigenvalues --    2.95279   2.98907   3.19054   4.06183   4.42731
 Alpha virt. eigenvalues --   43.11963
          Condensed to atoms (all electrons):
              1          2          3
     1  O    7.921740   0.306287   0.306287
     2  H    0.306287   0.453089  -0.026533
     3  H    0.306287  -0.026533   0.453089
 Mulliken atomic charges:
              1
     1  O   -0.534313
     2  H    0.267157
     3  H    0.267157
 Sum of Mulliken charges=   0.00000
 Atomic charges with hydrogens summed into heavy atoms:
              1
     1  O    0.000000
     2  H    0.000000
     3  H    0.000000
 Sum of Mulliken charges=   0.00000
 APT atomic charges:
              1
     1  O   -0.531734
     2  H    0.265867
     3  H    0.265867
 Sum of APT charges=   0.00000
 APT Atomic charges with hydrogens summed into heavy atoms:
              1
     1  O    0.000000
     2  H    0.000000
     3  H    0.000000
 Sum of APT charges=   0.00000
 Electronic spatial extent (au):  <R**2>=    19.7275
 Charge=     0.0000 electrons
 Dipole moment (field-independent basis, Debye):
    X=     0.0000    Y=     0.0000    Z=    -2.1459  Tot=     2.1459
 Quadrupole moment (field-independent basis, Debye-Ang):
   XX=    -7.5662   YY=    -4.3563   ZZ=    -6.3678
   XY=     0.0000   XZ=     0.0000   YZ=     0.0000
 Traceless Quadrupole moment (field-independent basis, Debye-Ang):
   XX=    -1.4694   YY=     1.7405   ZZ=    -0.2710
   XY=     0.0000   XZ=     0.0000   YZ=     0.0000
 Octapole moment (field-independent basis, Debye-Ang**2):
  XXX=     0.0000  YYY=     0.0000  ZZZ=    -1.3940  XYY=     0.0000
  XXY=     0.0000  XXZ=    -0.4005  XZZ=     0.0000  YZZ=     0.0000
  YYZ=    -1.2963  XYZ=     0.0000
 Hexadecapole moment (field-independent basis, Debye-Ang**3):
 XXXX=    -6.5027 YYYY=    -6.3646 ZZZZ=    -7.3289 XXXY=     0.0000
 XXXZ=     0.0000 YYYX=     0.0000 YYYZ=     0.0000 ZZZX=     0.0000
 ZZZY=     0.0000 XXYY=    -2.4292 XXZZ=    -2.3583 YYZZ=    -1.9679
 XXYZ=     0.0000 YYXZ=     0.0000 ZZXY=     0.0000
 N-N= 9.141175387937D+00 E-N=-1.991837109939D+02  KE= 7.617601983552D+01
 Symmetry A1   KE= 6.795675450070D+01
 Symmetry A2   KE= 3.093427616024D-35
 Symmetry B1   KE= 4.566113541419D+00
 Symmetry B2   KE= 3.653151793403D+00
  Exact polarizability:   4.934   0.000   7.990   0.000   0.000   6.413
 Approx polarizability:   5.164   0.000   9.789   0.000   0.000   7.578
 Rotating derivatives to standard orientation.
 Full mass-weighted force constant matrix:
 Low frequencies ---  -31.0175   -0.0013   -0.0011   -0.0009   18.5386   23.0299
 Low frequencies --- 1604.1144 3791.3457 3901.1014
 Diagonal vibrational polarizability:
        0.0000000       0.0742580       0.7255863
 Harmonic frequencies (cm**-1), IR intensities (KM/Mole), Raman scattering
 activities (A**4/AMU), depolarization ratios for plane and unpolarized
 incident light, reduced masses (AMU), force constants (mDyne/A),
 and normal coordinates:
                     1                      2                      3
                    A1                     A1                     B2
 Frequencies --  1604.1144              3791.3457              3901.1014
 Red. masses --     1.0832                 1.0447                 1.0824
 Frc consts  --     1.6422                 8.8477                 9.7051
 IR Inten    --    68.4282                 5.3099                41.9937
 Atom AN      X      Y      Z        X      Y      Z        X      Y      Z
   1   8     0.00   0.00   0.07     0.00   0.00   0.05     0.00   0.07   0.00
   2   1     0.00  -0.43  -0.56     0.00   0.59  -0.39     0.00  -0.56   0.43
   3   1     0.00   0.43  -0.56     0.00  -0.59  -0.39     0.00  -0.56  -0.43

 -------------------
 - Thermochemistry -
 -------------------
 Temperature   298.150 Kelvin.  Pressure   1.00000 Atm.
 Atom  1 has atomic number  8 and mass  15.99491
 Atom  2 has atomic number  1 and mass   1.00783
 Atom  3 has atomic number  1 and mass   1.00783
 Molecular mass:    18.01056 amu.
 Principal axes and moments of inertia in atomic units:
                           1         2         3
     EIGENVALUES --     2.19471   4.19991   6.39463
           X            0.00000   0.00000   1.00000
           Y            1.00000   0.00000   0.00000
           Z            0.00000   1.00000   0.00000
 This molecule is an asymmetric top.
 Rotational symmetry number  2.
 Rotational temperatures (Kelvin)     39.46474    20.62277    13.54478
 Rotational constants (GHZ):         822.31265   429.70925   282.22777
 Zero-point vibrational energy      55605.8 (Joules/Mol)
                                   13.29010 (Kcal/Mol)
 Vibrational temperatures:   2307.96  5454.89  5612.81
          (Kelvin)
 
 Zero-point correction=                           0.021179 (Hartree/Particle)
 Thermal correction to Energy=                    0.024015
 Thermal correction to Enthalpy=                  0.024959
 Thermal correction to Gibbs Free Energy=         0.003534
 Sum of electronic and zero-point Energies=            -76.439443
 Sum of electronic and thermal Energies=               -76.436607
 Sum of electronic and thermal Enthalpies=             -76.435663
 Sum of electronic and thermal Free Energies=          -76.457088
 
                     E (Thermal)             CV                S
                      KCal/Mol        Cal/Mol-Kelvin    Cal/Mol-Kelvin
 Total                   15.070              6.013             45.092
 Electronic               0.000              0.000              0.000
 Translational            0.889              2.981             34.608
 Rotational               0.889              2.981             10.476
 Vibrational             13.292              0.052              0.008
                       Q            Log10(Q)             Ln(Q)
 Total Bot       0.236737D-01         -1.625733         -3.743389
 Total V=0       0.130607D+09          8.115968         18.687707
 Vib (Bot)       0.181338D-09         -9.741512        -22.430661
 Vib (V=0)       0.100043D+01          0.000189          0.000435
 Electronic      0.100000D+01          0.000000          0.000000
 Translational   0.300432D+07          6.477746         14.915562
 Rotational      0.434543D+02          1.638033          3.771711
 ***** Axes restored to original set *****
 -------------------------------------------------------------------
 Center     Atomic                   Forces (Hartrees/Bohr)
 Number     Number              X              Y              Z
 -------------------------------------------------------------------
    1          8           0.000003119    0.000004413    0.000000000
    2          1          -0.000004855    0.000000123    0.000000000
    3          1           0.000001736   -0.000004536    0.000000000
 -------------------------------------------------------------------
 Cartesian Forces:  Max     0.000004855 RMS     0.000002913
 1\1\RECHENZENTRUM RWTH AACHEN-SRVMBFD\Freq\RB3LYP\TZVP\H2O1\JENS\03-Ju
 l-2014\0\\# opt=(tight,calcall) b3lyp tzvp\\Title Card Required\\0,1\O
 ,-2.4240323058,1.7179358565,0.\H,-1.4620585307,1.7555830891,0.\H,-2.70
 9657909,2.6372991541,0.\\Version=AM64L-G03RevE.01\State=1-A1\HF=-76.46
 0622\RMSD=1.961e-09\RMSF=2.913e-06\ZeroPoint=0.0211791\Thermal=0.02401
 49\Dipole=0.4872619,0.6894596,0.\DipoleDeriv=-0.4398538,0.0663307,0.,0
 .0663307,-0.3928759,0.,0.,0.,-0.762471,0.1387648,-0.0422497,0.,-0.0815
 631,0.2776001,0.,0.,0.,0.3812355,0.301089,-0.024081,0.,0.0152323,0.115
 2758,0.,0.,0.,0.3812355\Polar=7.4643721,-0.743224,6.9379933,0.,0.,4.93
 36444\PG=C02V [C2(O1),SGV(H2)]\NImag=0\\0.59923611,-0.11012490,0.52124
 157,0.,0.,0.00003593,-0.51649152,0.00789767,0.,0.53215621,-0.05137061,
 -0.04374732,0.,0.00273083,0.04595151,0.,0.,-0.00001796,0.,0.,-0.000009
 36,-0.08274459,0.10222723,0.,-0.01566469,0.04863978,0.,0.09840928,0.16
 149552,-0.47749425,0.,-0.01062851,-0.00220419,0.,-0.15086701,0.4796984
 4,0.,0.,-0.00001796,0.,0.,0.00002733,0.,0.,-0.00000936\\-0.00000312,-0
 .00000441,0.,0.00000486,-0.00000012,0.,-0.00000174,0.00000454,0.\\\@


 I MET A TRAVELLER FROM AN ANTIQUE LAND
 WHO SAID... TWO VAST AND TRUNKLESS LEGS OF STONE
 STAND IN THE DESERT..... NEAR THEM,  ON THE SAND,
 HALF SUNK,  A SHATTERED VISAGE LIES,  WHOSE FROWN,
 AND WRINKLED LIP,  AND SNEER OF COLD COMMAND
 TELL THAT ITS SCULPTOR WELL THOSE PASSIONS READ
 WHICH YET SURVIVE,  STAMPED ON THESE LIFELESS THINGS
 THE HAND THAT MOCKED THEM,  AND THE HEART THAT FED-
 AND ON THE PEDESTAL THESE WORDS APPEAR 
 MY NAME IS OZYMANDIAS, KING OF KINGS--   
 LOOK ON MY WORKS YE MIGHTY AND DESPAIR. 
 NOTHING BESIDE REMAINS,  ROUND THE DECAY 
 OF THAT COLOSSAL WRECK,  BOUNDLESS AND BARE
 THE LONE AND LEVEL SANDS STRETCH FAR AWAY.
                                    SHELLEY
 Job cpu time:  0 days  0 hours  0 minutes 18.4 seconds.
 File lengths (MBytes):  RWF=     13 Int=      0 D2E=      0 Chk=      6 Scr=      1
 Normal termination of Gaussian 03 at Thu Jul  3 18:06:05 2014.
