# Supplementary material for: CO from CO2and fluctuating renewable energy via formic-acid derivatives
Source: Royal Society of Chemistry journal article supplement (doi:10.1039/c6gc01202g), 2016-01-01
Supplement: c6gc01202g13.log [file c6gc01202g13.log]

 Entering Gaussian System, Link 0=/opt/mbfd/GAUSSIAN/LINUX64/g03.e01/g03
 Input=H2_geoopt.com
 Output=H2_geoopt.log
 Initial command:
 /opt/mbfd/GAUSSIAN/LINUX64/g03.e01/l1.exe /daten2/gaussianscratch/Gau-16033.inp -scrdir=/daten2/gaussianscratch/
 Entering Link 1 = /opt/mbfd/GAUSSIAN/LINUX64/g03.e01/l1.exe PID=     16037.
  
 Copyright (c) 1988,1990,1992,1993,1995,1998,2003,2004,2007, Gaussian, Inc.
                  All Rights Reserved.
  
 This is the Gaussian(R) 03 program.  It is based on the
 the Gaussian(R) 98 system (copyright 1998, Gaussian, Inc.),
 the Gaussian(R) 94 system (copyright 1995, Gaussian, Inc.),
 the Gaussian 92(TM) system (copyright 1992, Gaussian, Inc.),
 the Gaussian 90(TM) system (copyright 1990, Gaussian, Inc.),
 the Gaussian 88(TM) system (copyright 1988, Gaussian, Inc.),
 the Gaussian 86(TM) system (copyright 1986, Carnegie Mellon
 University), and the Gaussian 82(TM) system (copyright 1983,
 Carnegie Mellon University). Gaussian is a federally registered
 trademark of Gaussian, Inc.
  
 This software contains proprietary and confidential information,
 including trade secrets, belonging to Gaussian, Inc.
  
 This software is provided under written license and may be
 used, copied, transmitted, or stored only in accord with that
 written license.
  
 The following legend is applicable only to US Government
 contracts under FAR:
  
                    RESTRICTED RIGHTS LEGEND
  
 Use, reproduction and disclosure by the US Government is
 subject to restrictions as set forth in subparagraphs (a)
 and (c) of the Commercial Computer Software - Restricted
 Rights clause in FAR 52.227-19.
  
 Gaussian, Inc.
 340 Quinnipiac St., Bldg. 40, Wallingford CT 06492
  
  
 ---------------------------------------------------------------
 Warning -- This program may not be used in any manner that
 competes with the business of Gaussian, Inc. or will provide
 assistance to any competitor of Gaussian, Inc.  The licensee
 of this program is prohibited from giving any competitor of
 Gaussian, Inc. access to this program.  By using this program,
 the user acknowledges that Gaussian, Inc. is engaged in the
 business of creating and licensing software in the field of
 computational chemistry and represents and warrants to the
 licensee that it is not a competitor of Gaussian, Inc. and that
 it will not use this program in any manner prohibited above.
 ---------------------------------------------------------------
  

 Cite this work as:
 Gaussian 03, Revision E.01,
 M. J. Frisch, G. W. Trucks, H. B. Schlegel, G. E. Scuseria, 
 M. A. Robb, J. R. Cheeseman, J. A. Montgomery, Jr., T. Vreven, 
 K. N. Kudin, J. C. Burant, J. M. Millam, S. S. Iyengar, J. Tomasi, 
 V. Barone, B. Mennucci, M. Cossi, G. Scalmani, N. Rega, 
 G. A. Petersson, H. Nakatsuji, M. Hada, M. Ehara, K. Toyota, 
 R. Fukuda, J. Hasegawa, M. Ishida, T. Nakajima, Y. Honda, O. Kitao, 
 H. Nakai, M. Klene, X. Li, J. E. Knox, H. P. Hratchian, J. B. Cross, 
 V. Bakken, C. Adamo, J. Jaramillo, R. Gomperts, R. E. Stratmann, 
 O. Yazyev, A. J. Austin, R. Cammi, C. Pomelli, J. W. Ochterski, 
 P. Y. Ayala, K. Morokuma, G. A. Voth, P. Salvador, J. J. Dannenberg, 
 V. G. Zakrzewski, S. Dapprich, A. D. Daniels, M. C. Strain, 
 O. Farkas, D. K. Malick, A. D. Rabuck, K. Raghavachari, 
 J. B. Foresman, J. V. Ortiz, Q. Cui, A. G. Baboul, S. Clifford, 
 J. Cioslowski, B. B. Stefanov, G. Liu, A. Liashenko, P. Piskorz, 
 I. Komaromi, R. L. Martin, D. J. Fox, T. Keith, M. A. Al-Laham, 
 C. Y. Peng, A. Nanayakkara, M. Challacombe, P. M. W. Gill, 
 B. Johnson, W. Chen, M. W. Wong, C. Gonzalez, and J. A. Pople, 
 Gaussian, Inc., Wallingford CT, 2004.
 
 ******************************************
 Gaussian 03:  AM64L-G03RevE.01 11-Sep-2007
                16-Apr-2014 
 ******************************************
 %chk=H2.chk
 %mem=6MW
 %nprocshared=1
 Will use up to    1 processors via shared memory.
 Default route: MaxDisk=200000000
 ----------------------
 # opt=tight b3lyp tzvp
 ----------------------
 1/7=10,14=-1,18=20,26=3,38=1/1,3;
 2/9=110,17=6,18=5,40=1/2;
 3/5=19,7=101,11=2,16=1,25=1,30=1,74=-5/1,2,3;
 4//1;
 5/5=2,38=5/2;
 6/7=2,8=2,9=2,10=2,28=1/1;
 7//1,2,3,16;
 1/14=-1,18=20/3(3);
 2/9=110/2;
 6/7=2,8=2,9=2,10=2,19=2,28=1/1;
 99//99;
 2/9=110/2;
 3/5=19,7=101,11=2,16=1,25=1,30=1,74=-5/1,2,3;
 4/5=5,16=3/1;
 5/5=2,38=5/2;
 7//1,2,3,16;
 1/14=-1,18=20/3(-5);
 2/9=110/2;
 6/7=2,8=2,9=2,10=2,19=2,28=1/1;
 99/9=1/99;
 -------------------
 Title Card Required
 -------------------
 Symbolic Z-matrix:
 Charge =  0 Multiplicity = 1
 H                     0.        0.        0.37747 
 H                     0.        0.       -0.37747 
 

 GradGradGradGradGradGradGradGradGradGradGradGradGradGradGradGradGradGrad
 Berny optimization.
 Initialization pass.
                           ----------------------------
                           !    Initial Parameters    !
                           ! (Angstroms and Degrees)  !
 --------------------------                            --------------------------
 ! Name  Definition              Value          Derivative Info.                !
 --------------------------------------------------------------------------------
 ! R1    R(1,2)                  0.7549         estimate D2E/DX2                !
 --------------------------------------------------------------------------------
 Trust Radius=3.00D-01 FncErr=1.00D-07 GrdErr=1.00D-06
 Number of steps in this run=  20 maximum allowed number of steps= 100.
 GradGradGradGradGradGradGradGradGradGradGradGradGradGradGradGradGradGrad

                          Input orientation:                          
 ---------------------------------------------------------------------
 Center     Atomic     Atomic              Coordinates (Angstroms)
 Number     Number      Type              X           Y           Z
 ---------------------------------------------------------------------
    1          1             0        0.000000    0.000000    0.377465
    2          1             0        0.000000    0.000000   -0.377465
 ---------------------------------------------------------------------
 Stoichiometry    H2
 Framework group  D*H[C*(H.H)]
 Deg. of freedom     1
 Full point group                 D*H
 Largest Abelian subgroup         D2H     NOp   8
 Largest concise Abelian subgroup C2      NOp   2
                         Standard orientation:                         
 ---------------------------------------------------------------------
 Center     Atomic     Atomic              Coordinates (Angstroms)
 Number     Number      Type              X           Y           Z
 ---------------------------------------------------------------------
    1          1             0        0.000000    0.000000    0.377465
    2          1             0        0.000000    0.000000   -0.377465
 ---------------------------------------------------------------------
 Rotational constants (GHZ):      0.0000000   1759.7407090   1759.7407090
 Standard basis: TZVP (5D, 7F)
 There are     4 symmetry adapted basis functions of AG  symmetry.
 There are     0 symmetry adapted basis functions of B1G symmetry.
 There are     1 symmetry adapted basis functions of B2G symmetry.
 There are     1 symmetry adapted basis functions of B3G symmetry.
 There are     0 symmetry adapted basis functions of AU  symmetry.
 There are     4 symmetry adapted basis functions of B1U symmetry.
 There are     1 symmetry adapted basis functions of B2U symmetry.
 There are     1 symmetry adapted basis functions of B3U symmetry.
 Integral buffers will be    131072 words long.
 Raffenetti 2 integral format.
 Two-electron integral symmetry is turned on.
    12 basis functions,    16 primitive gaussians,    12 cartesian basis functions
     1 alpha electrons        1 beta electrons
       nuclear repulsion energy         0.7009619545 Hartrees.
 NAtoms=    2 NActive=    2 NUniq=    1 SFac= 3.00D+00 NAtFMM=   80 NAOKFM=F Big=F
 One-electron integrals computed using PRISM.
 NBasis=    12 RedAO= T  NBF=     4     0     1     1     0     4     1     1
 NBsUse=    12 1.00D-06 NBFU=     4     0     1     1     0     4     1     1
 Harris functional with IExCor=  402 diagonalized for initial guess.
 ExpMin= 1.03D-01 ExpMax= 3.41D+01 ExpMxC= 3.41D+01 IAcc=1 IRadAn=         1 AccDes= 1.00D-06
 HarFok:  IExCor= 402 AccDes= 1.00D-06 IRadAn=         1 IDoV=1
 ScaDFX=  1.000000  1.000000  1.000000  1.000000
 Initial guess orbital symmetries:
       Occupied  (SGG)
       Virtual   (SGU) (SGG) (SGU) (PIU) (PIU) (SGG) (PIG) (PIG)
                 (SGU) (SGG) (SGU)
 The electronic state of the initial guess is 1-SGG.
 Requested convergence on RMS density matrix=1.00D-08 within 128 cycles.
 Requested convergence on MAX density matrix=1.00D-06.
 Requested convergence on             energy=1.00D-06.
 No special actions if energy rises.
 Keep R1 integrals in memory in canonical form, NReq=     1695317.
 Integral accuracy reduced to 1.0D-05 until final iterations.
 Initial convergence to 1.0D-05 achieved.  Increase integral accuracy.
 SCF Done:  E(RB+HF-LYP) =  -1.17957016554     A.U. after    7 cycles
             Convg  =    0.1391D-08             -V/T =  2.0470
             S**2   =   0.0000

 **********************************************************************

            Population analysis using the SCF density.

 **********************************************************************

 Orbital symmetries:
       Occupied  (SGG)
       Virtual   (SGU) (SGG) (SGU) (PIU) (PIU) (SGG) (PIG) (PIG)
                 (SGU) (SGG) (SGU)
 The electronic state is 1-SGG.
 Alpha  occ. eigenvalues --   -0.43173
 Alpha virt. eigenvalues --    0.05553   0.19871   0.46880   1.16540   1.16540
 Alpha virt. eigenvalues --    1.61012   1.93310   1.93310   2.01664   2.41754
 Alpha virt. eigenvalues --    3.37137
          Condensed to atoms (all electrons):
              1          2
     1  H    0.587380   0.412620
     2  H    0.412620   0.587380
 Mulliken atomic charges:
              1
     1  H    0.000000
     2  H    0.000000
 Sum of Mulliken charges=   0.00000
 Atomic charges with hydrogens summed into heavy atoms:
              1
     1  H    0.000000
     2  H    0.000000
 Sum of Mulliken charges=   0.00000
 Electronic spatial extent (au):  <R**2>=     5.3224
 Charge=     0.0000 electrons
 Dipole moment (field-independent basis, Debye):
    X=     0.0000    Y=     0.0000    Z=     0.0000  Tot=     0.0000
 Quadrupole moment (field-independent basis, Debye-Ang):
   XX=    -2.1175   YY=    -2.1175   ZZ=    -1.5551
   XY=     0.0000   XZ=     0.0000   YZ=     0.0000
 Traceless Quadrupole moment (field-independent basis, Debye-Ang):
   XX=    -0.1875   YY=    -0.1875   ZZ=     0.3750
   XY=     0.0000   XZ=     0.0000   YZ=     0.0000
 Octapole moment (field-independent basis, Debye-Ang**2):
  XXX=     0.0000  YYY=     0.0000  ZZZ=     0.0000  XYY=     0.0000
  XXY=     0.0000  XXZ=     0.0000  XZZ=     0.0000  YZZ=     0.0000
  YYZ=     0.0000  XYZ=     0.0000
 Hexadecapole moment (field-independent basis, Debye-Ang**3):
 XXXX=    -2.2007 YYYY=    -2.2007 ZZZZ=    -3.1402 XXXY=     0.0000
 XXXZ=     0.0000 YYYX=     0.0000 YYYZ=     0.0000 ZZZX=     0.0000
 ZZZY=     0.0000 XXYY=    -0.7336 XXZZ=    -0.9071 YYZZ=    -0.9071
 XXYZ=     0.0000 YYXZ=     0.0000 ZZXY=     0.0000
 N-N= 7.009619544858D-01 E-N=-3.611673942835D+00  KE= 1.126598945608D+00
 Symmetry AG   KE= 1.126598945608D+00
 Symmetry B1G  KE= 0.000000000000D+00
 Symmetry B2G  KE= 2.802922154420D-34
 Symmetry B3G  KE= 2.802922154420D-34
 Symmetry AU   KE= 0.000000000000D+00
 Symmetry B1U  KE= 3.289374719537D-32
 Symmetry B2U  KE= 6.309629889592D-35
 Symmetry B3U  KE= 6.309629889592D-35
 ***** Axes restored to original set *****
 -------------------------------------------------------------------
 Center     Atomic                   Forces (Hartrees/Bohr)
 Number     Number              X              Y              Z
 -------------------------------------------------------------------
    1          1           0.000000000    0.000000000   -0.007490463
    2          1           0.000000000    0.000000000    0.007490463
 -------------------------------------------------------------------
 Cartesian Forces:  Max     0.007490463 RMS     0.004324621

 GradGradGradGradGradGradGradGradGradGradGradGradGradGradGradGradGradGrad
 Berny optimization.
 Internal  Forces:  Max     0.007490463 RMS     0.007490463
 Search for a local minimum.
 Step number   1 out of a maximum of  20
 All quantities printed in internal units (Hartrees-Bohrs-Radians)
 Second derivative matrix not updated -- first step.
 The second derivative matrix:
                          R1
           R1           0.37190
     Eigenvalues ---    0.37190
 RFO step:  Lambda=-1.50805812D-04.
 Linear search not attempted -- first point.
 Iteration  1 RMS(Cart)=  0.01423621 RMS(Int)=  0.00000000
 Iteration  2 RMS(Cart)=  0.00000000 RMS(Int)=  0.00000000
 Variable       Old X    -DE/DX   Delta X   Delta X   Delta X     New X
                                 (Linear)    (Quad)   (Total)
    R1        1.42661  -0.00749   0.00000  -0.02013  -0.02013   1.40648
         Item               Value     Threshold  Converged?
 Maximum Force            0.007490     0.000015     NO 
 RMS     Force            0.007490     0.000010     NO 
 Maximum Displacement     0.010067     0.000060     NO 
 RMS     Displacement     0.014236     0.000040     NO 
 Predicted change in Energy=-7.543347D-05
 GradGradGradGradGradGradGradGradGradGradGradGradGradGradGradGradGradGrad

                          Input orientation:                          
 ---------------------------------------------------------------------
 Center     Atomic     Atomic              Coordinates (Angstroms)
 Number     Number      Type              X           Y           Z
 ---------------------------------------------------------------------
    1          1             0        0.000000    0.000000    0.372138
    2          1             0        0.000000    0.000000   -0.372138
 ---------------------------------------------------------------------
 Stoichiometry    H2
 Framework group  D*H[C*(H.H)]
 Deg. of freedom     1
 Full point group                 D*H
 Largest Abelian subgroup         D2H     NOp   8
 Largest concise Abelian subgroup C2      NOp   2
                         Standard orientation:                         
 ---------------------------------------------------------------------
 Center     Atomic     Atomic              Coordinates (Angstroms)
 Number     Number      Type              X           Y           Z
 ---------------------------------------------------------------------
    1          1             0        0.000000    0.000000    0.372138
    2          1             0        0.000000    0.000000   -0.372138
 ---------------------------------------------------------------------
 Rotational constants (GHZ):      0.0000000   1810.4809460   1810.4809460
 Standard basis: TZVP (5D, 7F)
 There are     4 symmetry adapted basis functions of AG  symmetry.
 There are     0 symmetry adapted basis functions of B1G symmetry.
 There are     1 symmetry adapted basis functions of B2G symmetry.
 There are     1 symmetry adapted basis functions of B3G symmetry.
 There are     0 symmetry adapted basis functions of AU  symmetry.
 There are     4 symmetry adapted basis functions of B1U symmetry.
 There are     1 symmetry adapted basis functions of B2U symmetry.
 There are     1 symmetry adapted basis functions of B3U symmetry.
 Integral buffers will be    131072 words long.
 Raffenetti 2 integral format.
 Two-electron integral symmetry is turned on.
    12 basis functions,    16 primitive gaussians,    12 cartesian basis functions
     1 alpha electrons        1 beta electrons
       nuclear repulsion energy         0.7109958824 Hartrees.
 NAtoms=    2 NActive=    2 NUniq=    1 SFac= 3.00D+00 NAtFMM=   80 NAOKFM=F Big=F
 One-electron integrals computed using PRISM.
 NBasis=    12 RedAO= T  NBF=     4     0     1     1     0     4     1     1
 NBsUse=    12 1.00D-06 NBFU=     4     0     1     1     0     4     1     1
 Initial guess read from the read-write file:
 Initial guess orbital symmetries:
       Occupied  (SGG)
       Virtual   (SGU) (SGG) (SGU) (PIU) (PIU) (SGG) (PIG) (PIG)
                 (SGU) (SGG) (SGU)
 Requested convergence on RMS density matrix=1.00D-08 within 128 cycles.
 Requested convergence on MAX density matrix=1.00D-06.
 Requested convergence on             energy=1.00D-06.
 No special actions if energy rises.
 Keep R1 integrals in memory in canonical form, NReq=     1695317.
 SCF Done:  E(RB+HF-LYP) =  -1.17964889282     A.U. after    4 cycles
             Convg  =    0.2510D-09             -V/T =  2.0378
             S**2   =   0.0000
 ***** Axes restored to original set *****
 -------------------------------------------------------------------
 Center     Atomic                   Forces (Hartrees/Bohr)
 Number     Number              X              Y              Z
 -------------------------------------------------------------------
    1          1           0.000000000    0.000000000   -0.000248132
    2          1           0.000000000    0.000000000    0.000248132
 -------------------------------------------------------------------
 Cartesian Forces:  Max     0.000248132 RMS     0.000143259

 GradGradGradGradGradGradGradGradGradGradGradGradGradGradGradGradGradGrad
 Berny optimization.
 Internal  Forces:  Max     0.000248132 RMS     0.000248132
 Search for a local minimum.
 Step number   2 out of a maximum of  20
 All quantities printed in internal units (Hartrees-Bohrs-Radians)
 Update second derivatives using D2CorX and points  1  2
 Trust test= 1.04D+00 RLast= 2.01D-02 DXMaxT set to 3.00D-01
 The second derivative matrix:
                          R1
           R1           0.35972
     Eigenvalues ---    0.35972
 RFO step:  Lambda= 0.00000000D+00.
 Quartic linear search produced a step of  0.03309.
 Iteration  1 RMS(Cart)=  0.00047110 RMS(Int)=  0.00000000
 Iteration  2 RMS(Cart)=  0.00000000 RMS(Int)=  0.00000000
 Variable       Old X    -DE/DX   Delta X   Delta X   Delta X     New X
                                 (Linear)    (Quad)   (Total)
    R1        1.40648  -0.00025  -0.00067   0.00000  -0.00067   1.40581
         Item               Value     Threshold  Converged?
 Maximum Force            0.000248     0.000015     NO 
 RMS     Force            0.000248     0.000010     NO 
 Maximum Displacement     0.000333     0.000060     NO 
 RMS     Displacement     0.000471     0.000040     NO 
 Predicted change in Energy=-8.547938D-08
 GradGradGradGradGradGradGradGradGradGradGradGradGradGradGradGradGradGrad

                          Input orientation:                          
 ---------------------------------------------------------------------
 Center     Atomic     Atomic              Coordinates (Angstroms)
 Number     Number      Type              X           Y           Z
 ---------------------------------------------------------------------
    1          1             0        0.000000    0.000000    0.371962
    2          1             0        0.000000    0.000000   -0.371962
 ---------------------------------------------------------------------
 Stoichiometry    H2
 Framework group  D*H[C*(H.H)]
 Deg. of freedom     1
 Full point group                 D*H
 Largest Abelian subgroup         D2H     NOp   8
 Largest concise Abelian subgroup C2      NOp   2
                         Standard orientation:                         
 ---------------------------------------------------------------------
 Center     Atomic     Atomic              Coordinates (Angstroms)
 Number     Number      Type              X           Y           Z
 ---------------------------------------------------------------------
    1          1             0        0.000000    0.000000    0.371962
    2          1             0        0.000000    0.000000   -0.371962
 ---------------------------------------------------------------------
 Rotational constants (GHZ):      0.0000000   1812.1973798   1812.1973798
 Standard basis: TZVP (5D, 7F)
 There are     4 symmetry adapted basis functions of AG  symmetry.
 There are     0 symmetry adapted basis functions of B1G symmetry.
 There are     1 symmetry adapted basis functions of B2G symmetry.
 There are     1 symmetry adapted basis functions of B3G symmetry.
 There are     0 symmetry adapted basis functions of AU  symmetry.
 There are     4 symmetry adapted basis functions of B1U symmetry.
 There are     1 symmetry adapted basis functions of B2U symmetry.
 There are     1 symmetry adapted basis functions of B3U symmetry.
 Integral buffers will be    131072 words long.
 Raffenetti 2 integral format.
 Two-electron integral symmetry is turned on.
    12 basis functions,    16 primitive gaussians,    12 cartesian basis functions
     1 alpha electrons        1 beta electrons
       nuclear repulsion energy         0.7113328338 Hartrees.
 NAtoms=    2 NActive=    2 NUniq=    1 SFac= 3.00D+00 NAtFMM=   80 NAOKFM=F Big=F
 One-electron integrals computed using PRISM.
 NBasis=    12 RedAO= T  NBF=     4     0     1     1     0     4     1     1
 NBsUse=    12 1.00D-06 NBFU=     4     0     1     1     0     4     1     1
 Initial guess read from the read-write file:
 Initial guess orbital symmetries:
       Occupied  (SGG)
       Virtual   (SGU) (SGG) (SGU) (PIU) (PIU) (SGG) (PIG) (PIG)
                 (SGU) (SGG) (SGU)
 Requested convergence on RMS density matrix=1.00D-08 within 128 cycles.
 Requested convergence on MAX density matrix=1.00D-06.
 Requested convergence on             energy=1.00D-06.
 No special actions if energy rises.
 Keep R1 integrals in memory in canonical form, NReq=     1695317.
 SCF Done:  E(RB+HF-LYP) =  -1.17964897550     A.U. after    4 cycles
             Convg  =    0.3450D-12             -V/T =  2.0375
             S**2   =   0.0000
 ***** Axes restored to original set *****
 -------------------------------------------------------------------
 Center     Atomic                   Forces (Hartrees/Bohr)
 Number     Number              X              Y              Z
 -------------------------------------------------------------------
    1          1           0.000000000    0.000000000    0.000000050
    2          1           0.000000000    0.000000000   -0.000000050
 -------------------------------------------------------------------
 Cartesian Forces:  Max     0.000000050 RMS     0.000000029

 GradGradGradGradGradGradGradGradGradGradGradGradGradGradGradGradGradGrad
 Berny optimization.
 Internal  Forces:  Max     0.000000050 RMS     0.000000050
 Search for a local minimum.
 Step number   3 out of a maximum of  20
 All quantities printed in internal units (Hartrees-Bohrs-Radians)
 Update second derivatives using D2CorX and points  2  3
 Trust test= 9.67D-01 RLast= 6.66D-04 DXMaxT set to 3.00D-01
 The second derivative matrix:
                          R1
           R1           0.37251
     Eigenvalues ---    0.37251
 RFO step:  Lambda= 0.00000000D+00.
 Quartic linear search produced a step of -0.00020.
 Iteration  1 RMS(Cart)=  0.00000009 RMS(Int)=  0.00000000
 Variable       Old X    -DE/DX   Delta X   Delta X   Delta X     New X
                                 (Linear)    (Quad)   (Total)
    R1        1.40581   0.00000   0.00000   0.00000   0.00000   1.40581
         Item               Value     Threshold  Converged?
 Maximum Force            0.000000     0.000015     YES
 RMS     Force            0.000000     0.000010     YES
 Maximum Displacement     0.000000     0.000060     YES
 RMS     Displacement     0.000000     0.000040     YES
 Predicted change in Energy=-3.340990D-15
 Optimization completed.
    -- Stationary point found.
                           ----------------------------
                           !   Optimized Parameters   !
                           ! (Angstroms and Degrees)  !
 --------------------------                            --------------------------
 ! Name  Definition              Value          Derivative Info.                !
 --------------------------------------------------------------------------------
 ! R1    R(1,2)                  0.7439         -DE/DX =    0.0                 !
 --------------------------------------------------------------------------------
 GradGradGradGradGradGradGradGradGradGradGradGradGradGradGradGradGradGrad

                          Input orientation:                          
 ---------------------------------------------------------------------
 Center     Atomic     Atomic              Coordinates (Angstroms)
 Number     Number      Type              X           Y           Z
 ---------------------------------------------------------------------
    1          1             0        0.000000    0.000000    0.371962
    2          1             0        0.000000    0.000000   -0.371962
 ---------------------------------------------------------------------
 Stoichiometry    H2
 Framework group  D*H[C*(H.H)]
 Deg. of freedom     1
 Full point group                 D*H
 Largest Abelian subgroup         D2H     NOp   8
 Largest concise Abelian subgroup C2      NOp   2
                         Standard orientation:                         
 ---------------------------------------------------------------------
 Center     Atomic     Atomic              Coordinates (Angstroms)
 Number     Number      Type              X           Y           Z
 ---------------------------------------------------------------------
    1          1             0        0.000000    0.000000    0.371962
    2          1             0        0.000000    0.000000   -0.371962
 ---------------------------------------------------------------------
 Rotational constants (GHZ):      0.0000000   1812.1973798   1812.1973798

 **********************************************************************

            Population analysis using the SCF density.

 **********************************************************************

 Orbital symmetries:
       Occupied  (SGG)
       Virtual   (SGU) (SGG) (SGU) (PIU) (PIU) (SGG) (PIG) (PIG)
                 (SGU) (SGG) (SGU)
 The electronic state is 1-SGG.
 Alpha  occ. eigenvalues --   -0.43398
 Alpha virt. eigenvalues --    0.05769   0.19801   0.47277   1.16596   1.16596
 Alpha virt. eigenvalues --    1.61545   1.94133   1.94133   2.00127   2.41927
 Alpha virt. eigenvalues --    3.42619
          Condensed to atoms (all electrons):
              1          2
     1  H    0.585516   0.414484
     2  H    0.414484   0.585516
 Mulliken atomic charges:
              1
     1  H    0.000000
     2  H    0.000000
 Sum of Mulliken charges=   0.00000
 Atomic charges with hydrogens summed into heavy atoms:
              1
     1  H    0.000000
     2  H    0.000000
 Sum of Mulliken charges=   0.00000
 Electronic spatial extent (au):  <R**2>=     5.2685
 Charge=     0.0000 electrons
 Dipole moment (field-independent basis, Debye):
    X=     0.0000    Y=     0.0000    Z=     0.0000  Tot=     0.0000
 Quadrupole moment (field-independent basis, Debye-Ang):
   XX=    -2.1023   YY=    -2.1023   ZZ=    -1.5526
   XY=     0.0000   XZ=     0.0000   YZ=     0.0000
 Traceless Quadrupole moment (field-independent basis, Debye-Ang):
   XX=    -0.1832   YY=    -0.1832   ZZ=     0.3664
   XY=     0.0000   XZ=     0.0000   YZ=     0.0000
 Octapole moment (field-independent basis, Debye-Ang**2):
  XXX=     0.0000  YYY=     0.0000  ZZZ=     0.0000  XYY=     0.0000
  XXY=     0.0000  XXZ=     0.0000  XZZ=     0.0000  YZZ=     0.0000
  YYZ=     0.0000  XYZ=     0.0000
 Hexadecapole moment (field-independent basis, Debye-Ang**3):
 XXXX=    -2.1732 YYYY=    -2.1732 ZZZZ=    -3.0769 XXXY=     0.0000
 XXXZ=     0.0000 YYYX=     0.0000 YYYZ=     0.0000 ZZZX=     0.0000
 ZZZY=     0.0000 XXYY=    -0.7244 XXZZ=    -0.8911 YYZZ=    -0.8911
 XXYZ=     0.0000 YYXZ=     0.0000 ZZXY=     0.0000
 N-N= 7.113328337949D-01 E-N=-3.636408474434D+00  KE= 1.136977884043D+00
 Symmetry AG   KE= 1.136977884043D+00
 Symmetry B1G  KE= 0.000000000000D+00
 Symmetry B2G  KE= 2.891268468482D-34
 Symmetry B3G  KE= 2.891268468482D-34
 Symmetry AU   KE= 0.000000000000D+00
 Symmetry B1U  KE= 1.589204086698D-31
 Symmetry B2U  KE= 6.353008386272D-35
 Symmetry B3U  KE= 6.353008386272D-35
 1\1\RECHENZENTRUM RWTH AACHEN-PC-JENS\FOpt\RB3LYP\TZVP\H2\JENS\16-Apr-
 2014\0\\# opt=tight b3lyp tzvp\\Title Card Required\\0,1\H,0.,0.,0.371
 9617478\H,0.,0.,-0.3719617478\\Version=AM64L-G03RevE.01\State=1-SGG\HF
 =-1.179649\RMSD=3.450e-13\RMSF=2.880e-08\Thermal=0.\Dipole=0.,0.,0.\PG
 =D*H [C*(H1.H1)]\\@


 ABOVE ALL I AM AN OPTIMIST FOR NUMBER THEORY,
 AND I HOLD THE HOPE THAT WE MAY NOT BE FAR FROM
 A TIME WHEN IRREFUTABLE ARITHMETIC WILL CELEBRATE
 ITS TRIUMPHS IN PHYSICS AND CHEMISTRY.
   -- HERMANN MINKOWSKI, 1905
 Job cpu time:  0 days  0 hours  0 minutes  1.3 seconds.
 File lengths (MBytes):  RWF=     13 Int=      0 D2E=      0 Chk=      6 Scr=      1
 Normal termination of Gaussian 03 at Wed Apr 16 15:43:29 2014.
