# Supplementary material for: CO from CO2and fluctuating renewable energy via formic-acid derivatives
Source: Royal Society of Chemistry journal article supplement (doi:10.1039/c6gc01202g), 2016-01-01
Supplement: c6gc01202g14.log [file c6gc01202g14.log]

 Entering Gaussian System, Link 0=/opt/mbfd/GAUSSIAN/LINUX64/g03.e01/g03
 Input=HCOOH_geopt_B3LYP_TZVP_correct_conf_tight_calcall.com
 Output=HCOOH_geopt_B3LYP_TZVP_correct_conf_tight_calcall.log
 Initial command:
 /opt/mbfd/GAUSSIAN/LINUX64/g03.e01/l1.exe /daten2/gaussianscratch/Gau-17010.inp -scrdir=/daten2/gaussianscratch/
 Entering Link 1 = /opt/mbfd/GAUSSIAN/LINUX64/g03.e01/l1.exe PID=     17014.
  
 Copyright (c) 1988,1990,1992,1993,1995,1998,2003,2004,2007, Gaussian, Inc.
                  All Rights Reserved.
  
 This is the Gaussian(R) 03 program.  It is based on the
 the Gaussian(R) 98 system (copyright 1998, Gaussian, Inc.),
 the Gaussian(R) 94 system (copyright 1995, Gaussian, Inc.),
 the Gaussian 92(TM) system (copyright 1992, Gaussian, Inc.),
 the Gaussian 90(TM) system (copyright 1990, Gaussian, Inc.),
 the Gaussian 88(TM) system (copyright 1988, Gaussian, Inc.),
 the Gaussian 86(TM) system (copyright 1986, Carnegie Mellon
 University), and the Gaussian 82(TM) system (copyright 1983,
 Carnegie Mellon University). Gaussian is a federally registered
 trademark of Gaussian, Inc.
  
 This software contains proprietary and confidential information,
 including trade secrets, belonging to Gaussian, Inc.
  
 This software is provided under written license and may be
 used, copied, transmitted, or stored only in accord with that
 written license.
  
 The following legend is applicable only to US Government
 contracts under FAR:
  
                    RESTRICTED RIGHTS LEGEND
  
 Use, reproduction and disclosure by the US Government is
 subject to restrictions as set forth in subparagraphs (a)
 and (c) of the Commercial Computer Software - Restricted
 Rights clause in FAR 52.227-19.
  
 Gaussian, Inc.
 340 Quinnipiac St., Bldg. 40, Wallingford CT 06492
  
  
 ---------------------------------------------------------------
 Warning -- This program may not be used in any manner that
 competes with the business of Gaussian, Inc. or will provide
 assistance to any competitor of Gaussian, Inc.  The licensee
 of this program is prohibited from giving any competitor of
 Gaussian, Inc. access to this program.  By using this program,
 the user acknowledges that Gaussian, Inc. is engaged in the
 business of creating and licensing software in the field of
 computational chemistry and represents and warrants to the
 licensee that it is not a competitor of Gaussian, Inc. and that
 it will not use this program in any manner prohibited above.
 ---------------------------------------------------------------
  

 Cite this work as:
 Gaussian 03, Revision E.01,
 M. J. Frisch, G. W. Trucks, H. B. Schlegel, G. E. Scuseria, 
 M. A. Robb, J. R. Cheeseman, J. A. Montgomery, Jr., T. Vreven, 
 K. N. Kudin, J. C. Burant, J. M. Millam, S. S. Iyengar, J. Tomasi, 
 V. Barone, B. Mennucci, M. Cossi, G. Scalmani, N. Rega, 
 G. A. Petersson, H. Nakatsuji, M. Hada, M. Ehara, K. Toyota, 
 R. Fukuda, J. Hasegawa, M. Ishida, T. Nakajima, Y. Honda, O. Kitao, 
 H. Nakai, M. Klene, X. Li, J. E. Knox, H. P. Hratchian, J. B. Cross, 
 V. Bakken, C. Adamo, J. Jaramillo, R. Gomperts, R. E. Stratmann, 
 O. Yazyev, A. J. Austin, R. Cammi, C. Pomelli, J. W. Ochterski, 
 P. Y. Ayala, K. Morokuma, G. A. Voth, P. Salvador, J. J. Dannenberg, 
 V. G. Zakrzewski, S. Dapprich, A. D. Daniels, M. C. Strain, 
 O. Farkas, D. K. Malick, A. D. Rabuck, K. Raghavachari, 
 J. B. Foresman, J. V. Ortiz, Q. Cui, A. G. Baboul, S. Clifford, 
 J. Cioslowski, B. B. Stefanov, G. Liu, A. Liashenko, P. Piskorz, 
 I. Komaromi, R. L. Martin, D. J. Fox, T. Keith, M. A. Al-Laham, 
 C. Y. Peng, A. Nanayakkara, M. Challacombe, P. M. W. Gill, 
 B. Johnson, W. Chen, M. W. Wong, C. Gonzalez, and J. A. Pople, 
 Gaussian, Inc., Wallingford CT, 2004.
 
 ******************************************
 Gaussian 03:  AM64L-G03RevE.01 11-Sep-2007
                17-Jul-2014 
 ******************************************
 %chk=HCOOH_geopt_B3LYP_TZVP_correct_conf.chk
 %mem=2000MB
 %nprocshared=2
 Will use up to    2 processors via shared memory.
 Default route: MaxDisk=200000000
 ----------------------------------------------------------------------
 # opt=(verytight,calcall) int=ultrafine freq b3lyp geom=connectivity t
 zvp
 ----------------------------------------------------------------------
 1/7=1,10=4,14=-1,18=20,26=3,38=1,57=2/1,3;
 2/9=110,17=6,18=5,40=1/2;
 3/5=19,7=101,11=2,16=1,25=1,30=1,74=-5,75=5/1,2,3;
 4//1;
 5/5=2,38=5/2;
 8/6=4,10=90,11=11/1;
 11/6=1,8=1,9=11,15=111,16=1/1,2,10;
 10/6=1/2;
 6/7=2,8=2,9=2,10=2,18=1,28=1/1;
 7/10=1,25=1/1,2,3,16;
 1/10=4,14=-1,18=20/3(3);
 2/9=110/2;
 7/8=1,9=1,25=1,44=-1/16;
 99//99;
 2/9=110/2;
 3/5=19,7=101,11=2,16=1,25=1,30=1,74=-5,75=5/1,2,3;
 4/5=5,16=3/1;
 5/5=2,38=5/2;
 8/6=4,10=90,11=11/1;
 11/6=1,8=1,9=11,15=111,16=1/1,2,10;
 10/6=1/2;
 7/10=1,25=1/1,2,3,16;
 1/10=4,14=-1,18=20/3(-8);
 2/9=110/2;
 6/7=2,8=2,9=2,10=2,18=1,19=2,28=1/1;
 7/8=1,9=1,25=1,44=-1/16;
 99//99;
 -------------------
 Title Card Required
 -------------------
 Symbolic Z-matrix:
 Charge =  0 Multiplicity = 1
 C                     0.13185   0.36837  -0.0001 
 H                     0.54854   0.53375  -1.01466 
 O                     0.67107   0.7245    1.02163 
 O                    -1.06751  -0.28462   0.00003 
 H                    -1.3176   -0.47665   0.9174 
 

 GradGradGradGradGradGradGradGradGradGradGradGradGradGradGradGradGradGrad
 Berny optimization.
 Initialization pass.
                           ----------------------------
                           !    Initial Parameters    !
                           ! (Angstroms and Degrees)  !
 --------------------------                            --------------------------
 ! Name  Definition              Value          Derivative Info.                !
 --------------------------------------------------------------------------------
 ! R1    R(1,2)                  1.1092         calculate D2E/DX2 analytically  !
 ! R2    R(1,3)                  1.2089         calculate D2E/DX2 analytically  !
 ! R3    R(1,4)                  1.3656         calculate D2E/DX2 analytically  !
 ! R4    R(4,5)                  0.9701         calculate D2E/DX2 analytically  !
 ! A1    A(2,1,3)              124.164          calculate D2E/DX2 analytically  !
 ! A2    A(2,1,4)              113.6604         calculate D2E/DX2 analytically  !
 ! A3    A(3,1,4)              122.1756         calculate D2E/DX2 analytically  !
 ! A4    A(1,4,5)              108.7337         calculate D2E/DX2 analytically  !
 ! D1    D(2,1,4,5)            173.8916         calculate D2E/DX2 analytically  !
 ! D2    D(3,1,4,5)             -6.14           calculate D2E/DX2 analytically  !
 --------------------------------------------------------------------------------
 Trust Radius=3.00D-01 FncErr=1.00D-07 GrdErr=1.00D-06
 Number of steps in this run=  20 maximum allowed number of steps= 100.
 GradGradGradGradGradGradGradGradGradGradGradGradGradGradGradGradGradGrad

                          Input orientation:                          
 ---------------------------------------------------------------------
 Center     Atomic     Atomic              Coordinates (Angstroms)
 Number     Number      Type              X           Y           Z
 ---------------------------------------------------------------------
    1          6             0        0.131851    0.368367   -0.000101
    2          1             0        0.548536    0.533749   -1.014665
    3          8             0        0.671069    0.724502    1.021625
    4          8             0       -1.067511   -0.284616    0.000027
    5          1             0       -1.317598   -0.476645    0.917403
 ---------------------------------------------------------------------
                    Distance matrix (angstroms):
                    1          2          3          4          5
     1  C    0.000000
     2  H    1.109197   0.000000
     3  O    1.208930   2.048872   0.000000
     4  O    1.365597   2.076278   2.254915   0.000000
     5  H    1.912266   2.869885   2.325599   0.970051   0.000000
 Stoichiometry    CH2O2
 Framework group  C1[X(CH2O2)]
 Deg. of freedom     9
 Full point group                 C1
 Largest Abelian subgroup         C1      NOp   1
 Largest concise Abelian subgroup C1      NOp   1
                         Standard orientation:                         
 ---------------------------------------------------------------------
 Center     Atomic     Atomic              Coordinates (Angstroms)
 Number     Number      Type              X           Y           Z
 ---------------------------------------------------------------------
    1          6             0       -0.144423    0.421671    0.005051
    2          1             0       -0.176285    1.530197    0.026772
    3          8             0       -1.124807   -0.285628   -0.004269
    4          8             0        1.121593   -0.089984   -0.011355
    5          1             0        1.068536   -1.055333    0.067916
 ---------------------------------------------------------------------
 Rotational constants (GHZ):     72.2087801     12.0802354     10.3521196
 Standard basis: TZVP (5D, 7F)
 There are    69 symmetry adapted basis functions of A   symmetry.
 Integral buffers will be    131072 words long.
 Raffenetti 2 integral format.
 Two-electron integral symmetry is turned on.
    69 basis functions,   121 primitive gaussians,    72 cartesian basis functions
    12 alpha electrons       12 beta electrons
       nuclear repulsion energy        69.6272532022 Hartrees.
 NAtoms=    5 NActive=    5 NUniq=    5 SFac= 7.50D-01 NAtFMM=   80 NAOKFM=F Big=F
 One-electron integrals computed using PRISM.
 NBasis=    69 RedAO= T  NBF=    69
 NBsUse=    69 1.00D-06 NBFU=    69
 Harris functional with IExCor=  402 diagonalized for initial guess.
 ExpMin= 9.52D-02 ExpMax= 2.70D+04 ExpMxC= 9.22D+02 IAcc=3 IRadAn=         5 AccDes= 0.00D+00
 HarFok:  IExCor= 402 AccDes= 0.00D+00 IRadAn=         5 IDoV=1
 ScaDFX=  1.000000  1.000000  1.000000  1.000000
 Initial guess orbital symmetries:
       Occupied  (A) (A) (A) (A) (A) (A) (A) (A) (A) (A) (A) (A)
       Virtual   (A) (A) (A) (A) (A) (A) (A) (A) (A) (A) (A) (A)
                 (A) (A) (A) (A) (A) (A) (A) (A) (A) (A) (A) (A)
                 (A) (A) (A) (A) (A) (A) (A) (A) (A) (A) (A) (A)
                 (A) (A) (A) (A) (A) (A) (A) (A) (A) (A) (A) (A)
                 (A) (A) (A) (A) (A) (A) (A) (A) (A)
 The electronic state of the initial guess is 1-A.
 Requested convergence on RMS density matrix=1.00D-08 within 128 cycles.
 Requested convergence on MAX density matrix=1.00D-06.
 Requested convergence on             energy=1.00D-06.
 No special actions if energy rises.
 Keep R1 integrals in memory in canonical form, NReq=     5319061.
 Integral accuracy reduced to 1.0D-05 until final iterations.
 Initial convergence to 1.0D-05 achieved.  Increase integral accuracy.
 SCF Done:  E(RB+HF-LYP) =  -189.837308915     A.U. after   13 cycles
             Convg  =    0.3861D-08             -V/T =  2.0045
             S**2   =   0.0000
 Range of M.O.s used for correlation:     1    69
 NBasis=    69 NAE=    12 NBE=    12 NFC=     0 NFV=     0
 NROrb=     69 NOA=    12 NOB=    12 NVA=    57 NVB=    57
 Symmetrizing basis deriv contribution to polar:
 IMax=3 JMax=2 DiffMx= 0.00D+00
 G2DrvN: will do    6 centers at a time, making    1 passes doing MaxLOS=2.
 FoFDir/FoFCou used for L=0 through L=2.
 DoAtom=TTTTT
          Differentiating once with respect to electric field.
                with respect to dipole field.
          Differentiating once with respect to nuclear coordinates.
          Store integrals in memory, NReq=     4276606.
          There are  18 degrees of freedom in the 1st order CPHF.
    15 vectors were produced by pass  0.
 AX will form  15 AO Fock derivatives at one time.
    15 vectors were produced by pass  1.
    15 vectors were produced by pass  2.
    15 vectors were produced by pass  3.
    15 vectors were produced by pass  4.
    14 vectors were produced by pass  5.
     4 vectors were produced by pass  6.
 Inv2:  IOpt= 1 Iter= 1 AM= 1.59D-15 Conv= 1.00D-12.
 Inverted reduced A of dimension   93 with in-core refinement.
 Isotropic polarizability for W=    0.000000       19.26 Bohr**3.
 End of Minotr Frequency-dependent properties file   721 does not exist.

 **********************************************************************

            Population analysis using the SCF density.

 **********************************************************************

 Orbital symmetries:
       Occupied  (A) (A) (A) (A) (A) (A) (A) (A) (A) (A) (A) (A)
       Virtual   (A) (A) (A) (A) (A) (A) (A) (A) (A) (A) (A) (A)
                 (A) (A) (A) (A) (A) (A) (A) (A) (A) (A) (A) (A)
                 (A) (A) (A) (A) (A) (A) (A) (A) (A) (A) (A) (A)
                 (A) (A) (A) (A) (A) (A) (A) (A) (A) (A) (A) (A)
                 (A) (A) (A) (A) (A) (A) (A) (A) (A)
 The electronic state is 1-A.
 Alpha  occ. eigenvalues --  -19.19301 -19.14101 -10.32652  -1.12404  -1.03876
 Alpha  occ. eigenvalues --   -0.67613  -0.53858  -0.50043  -0.46023  -0.41965
 Alpha  occ. eigenvalues --   -0.34521  -0.30630
 Alpha virt. eigenvalues --   -0.02739   0.02309   0.06956   0.12681   0.15227
 Alpha virt. eigenvalues --    0.19672   0.26704   0.30628   0.35786   0.41525
 Alpha virt. eigenvalues --    0.42637   0.45192   0.49571   0.51287   0.51346
 Alpha virt. eigenvalues --    0.57090   0.59117   0.72819   0.76805   1.23566
 Alpha virt. eigenvalues --    1.24667   1.26332   1.28772   1.33245   1.40759
 Alpha virt. eigenvalues --    1.58817   1.63205   1.68949   1.86193   1.96142
 Alpha virt. eigenvalues --    1.98605   2.05787   2.21143   2.39065   2.41835
 Alpha virt. eigenvalues --    2.53418   2.58908   2.60464   2.61017   2.63019
 Alpha virt. eigenvalues --    2.65936   2.68729   2.78743   2.88797   2.93299
 Alpha virt. eigenvalues --    2.95242   3.02714   3.06214   3.15204   3.20606
 Alpha virt. eigenvalues --    3.54948   3.83181   4.16806   4.27424  21.89405
 Alpha virt. eigenvalues --   43.25698  43.35819
          Condensed to atoms (all electrons):
              1          2          3          4          5
     1  C    4.576491   0.390761   0.556878   0.266627  -0.015653
     2  H    0.390761   0.636125  -0.058925  -0.083497   0.010429
     3  O    0.556878  -0.058925   7.931632  -0.116064   0.006384
     4  O    0.266627  -0.083497  -0.116064   7.955286   0.277642
     5  H   -0.015653   0.010429   0.006384   0.277642   0.431299
 Mulliken atomic charges:
              1
     1  C    0.224895
     2  H    0.105106
     3  O   -0.319906
     4  O   -0.299995
     5  H    0.289899
 Sum of Mulliken charges=   0.00000
 Atomic charges with hydrogens summed into heavy atoms:
              1
     1  C    0.330001
     2  H    0.000000
     3  O   -0.319906
     4  O   -0.010096
     5  H    0.000000
 Sum of Mulliken charges=   0.00000
 APT atomic charges:
              1
     1  C    1.081359
     2  H    0.025081
     3  O   -0.699876
     4  O   -0.698907
     5  H    0.292344
 Sum of APT charges=   0.00000
 APT Atomic charges with hydrogens summed into heavy atoms:
              1
     1  C    1.106439
     2  H    0.000000
     3  O   -0.699876
     4  O   -0.406563
     5  H    0.000000
 Sum of APT charges=   0.00000
 Electronic spatial extent (au):  <R**2>=   134.4167
 Charge=     0.0000 electrons
 Dipole moment (field-independent basis, Debye):
    X=     1.3663    Y=     0.3142    Z=     0.1713  Tot=     1.4124
 Quadrupole moment (field-independent basis, Debye-Ang):
   XX=   -21.6794   YY=   -13.6064   ZZ=   -17.1222
   XY=    -3.1135   XZ=     0.1647   YZ=    -0.1632
 Traceless Quadrupole moment (field-independent basis, Debye-Ang):
   XX=    -4.2100   YY=     3.8629   ZZ=     0.3471
   XY=    -3.1135   XZ=     0.1647   YZ=    -0.1632
 Octapole moment (field-independent basis, Debye-Ang**2):
  XXX=     2.7069  YYY=    -1.3552  ZZZ=     0.0383  XYY=     2.9946
  XXY=    -2.4135  XXZ=     0.1846  XZZ=    -0.0655  YZZ=    -0.5416
  YYZ=     0.2337  XYZ=    -0.2102
 Hexadecapole moment (field-independent basis, Debye-Ang**3):
 XXXX=  -112.9865 YYYY=   -29.2734 ZZZZ=   -14.6972 XXXY=    -4.5133
 XXXZ=     0.2844 YYYX=    -4.8433 YYYZ=    -0.1932 ZZZX=     0.0975
 ZZZY=    -0.1006 XXYY=   -20.7076 XXZZ=   -20.4724 YYZZ=    -8.5597
 XXYZ=    -0.2478 YYXZ=     0.1832 ZZXY=    -0.3476
 N-N= 6.962725320219D+01 E-N=-5.862161287721D+02  KE= 1.889780032176D+02
  Exact polarizability:  24.343   0.624  21.429   0.040  -0.041  12.018
 Approx polarizability:  37.793   4.060  28.457   0.020  -0.085  15.245
 ***** Axes restored to original set *****
 -------------------------------------------------------------------
 Center     Atomic                   Forces (Hartrees/Bohr)
 Number     Number              X              Y              Z
 -------------------------------------------------------------------
    1          6          -0.003819634    0.000027193    0.023735852
    2          1          -0.009601252   -0.003657389    0.006277662
    3          8          -0.001918508   -0.003362833   -0.016515305
    4          8           0.013378472    0.003230169   -0.014765244
    5          1           0.001960923    0.003762859    0.001267035
 -------------------------------------------------------------------
 Cartesian Forces:  Max     0.023735852 RMS     0.009790250

 GradGradGradGradGradGradGradGradGradGradGradGradGradGradGradGradGradGrad
 Berny optimization.
 Internal  Forces:  Max     0.016817287 RMS     0.010386368
 Search for a local minimum.
 Step number   1 out of a maximum of  20
 All quantities printed in internal units (Hartrees-Bohrs-Radians)
 Second derivative matrix not updated -- analytic derivatives used.
 The second derivative matrix:
                          R1        R2        R3        R4        A1
           R1           0.30824
           R2           0.02343   0.82061
           R3           0.01027   0.09061   0.34752
           R4          -0.00123  -0.00568   0.00872   0.50367
           A1           0.00280   0.00661  -0.03550   0.00327   0.11648
           A2           0.00918  -0.04694   0.01224   0.00739  -0.02193
           A3          -0.01198   0.04033   0.02326  -0.01065  -0.09455
           A4           0.00317   0.00358   0.03231   0.02451   0.00441
           D1           0.00037  -0.00086   0.00189  -0.00059  -0.00051
           D2           0.00021  -0.00080   0.00349  -0.00051  -0.00073
                          A2        A3        A4        D1        D2
           A2           0.11448
           A3          -0.09255   0.18710
           A4           0.02635  -0.03076   0.16079
           D1           0.00155  -0.00113   0.00030   0.09437
           D2          -0.00046   0.00128   0.00343  -0.07541   0.09534
     Eigenvalues ---    0.01935   0.12318   0.14553   0.17046   0.27420
     Eigenvalues ---    0.31676   0.34698   0.50715   0.844971000.00000
 RFO step:  Lambda=-3.56150387D-03.
 Linear search not attempted -- first point.
 Iteration  1 RMS(Cart)=  0.05119550 RMS(Int)=  0.00213903
 Iteration  2 RMS(Cart)=  0.00185859 RMS(Int)=  0.00000285
 Iteration  3 RMS(Cart)=  0.00000392 RMS(Int)=  0.00000001
 Iteration  4 RMS(Cart)=  0.00000000 RMS(Int)=  0.00000001
 Variable       Old X    -DE/DX   Delta X   Delta X   Delta X     New X
                                 (Linear)    (Quad)   (Total)
    R1        2.09608  -0.00989   0.00000  -0.02483  -0.02483   2.07125
    R2        2.28455  -0.01580   0.00000  -0.02065  -0.02065   2.26390
    R3        2.58060  -0.01682   0.00000  -0.04106  -0.04106   2.53955
    R4        1.83313  -0.00005   0.00000   0.00326   0.00326   1.83639
    A1        2.16707   0.00013   0.00000   0.02055   0.02055   2.18762
    A2        1.98375  -0.01409   0.00000  -0.07383  -0.07383   1.90992
    A3        2.13237   0.01396   0.00000   0.05328   0.05328   2.18564
    A4        1.89776  -0.00678   0.00000  -0.01376  -0.01376   1.88400
    D1        3.03498   0.00200   0.00000   0.09956   0.09956   3.13454
    D2       -0.10716   0.00222   0.00000   0.09927   0.09927  -0.00789
         Item               Value     Threshold  Converged?
 Maximum Force            0.016817     0.000002     NO 
 RMS     Force            0.010386     0.000001     NO 
 Maximum Displacement     0.095815     0.000006     NO 
 RMS     Displacement     0.051991     0.000004     NO 
 Predicted change in Energy=-1.836683D-03
 GradGradGradGradGradGradGradGradGradGradGradGradGradGradGradGradGradGrad

                          Input orientation:                          
 ---------------------------------------------------------------------
 Center     Atomic     Atomic              Coordinates (Angstroms)
 Number     Number      Type              X           Y           Z
 ---------------------------------------------------------------------
    1          6             0        0.135182    0.363895    0.023161
    2          1             0        0.497833    0.528903   -0.997919
    3          8             0        0.689009    0.725231    1.022122
    4          8             0       -1.028847   -0.306380   -0.018695
    5          1             0       -1.326830   -0.446293    0.895622
 ---------------------------------------------------------------------
                    Distance matrix (angstroms):
                    1          2          3          4          5
     1  C    0.000000
     2  H    1.096060   0.000000
     3  O    1.198002   2.038543   0.000000
     4  O    1.343870   1.996830   2.257997   0.000000
     5  H    1.885490   2.804621   2.334968   0.971774   0.000000
 Stoichiometry    CH2O2
 Framework group  C1[X(CH2O2)]
 Deg. of freedom     9
 Full point group                 C1
 Largest Abelian subgroup         C1      NOp   1
 Largest concise Abelian subgroup C1      NOp   1
                         Standard orientation:                         
 ---------------------------------------------------------------------
 Center     Atomic     Atomic              Coordinates (Angstroms)
 Number     Number      Type              X           Y           Z
 ---------------------------------------------------------------------
    1          6             0       -0.135931    0.397947    0.000511
    2          1             0       -0.101245    1.493457    0.001638
    3          8             0       -1.134604   -0.263763   -0.000339
    4          8             0        1.116618   -0.088988   -0.000837
    5          1             0        1.060716   -1.059136    0.004700
 ---------------------------------------------------------------------
 Rotational constants (GHZ):     78.1138736     12.0545026     10.4429672
 Standard basis: TZVP (5D, 7F)
 There are    69 symmetry adapted basis functions of A   symmetry.
 Integral buffers will be    131072 words long.
 Raffenetti 2 integral format.
 Two-electron integral symmetry is turned on.
    69 basis functions,   121 primitive gaussians,    72 cartesian basis functions
    12 alpha electrons       12 beta electrons
       nuclear repulsion energy        70.2378638258 Hartrees.
 NAtoms=    5 NActive=    5 NUniq=    5 SFac= 7.50D-01 NAtFMM=   80 NAOKFM=F Big=F
 One-electron integrals computed using PRISM.
 NBasis=    69 RedAO= T  NBF=    69
 NBsUse=    69 1.00D-06 NBFU=    69
 Initial guess read from the read-write file:
 Initial guess orbital symmetries:
       Occupied  (A) (A) (A) (A) (A) (A) (A) (A) (A) (A) (A) (A)
       Virtual   (A) (A) (A) (A) (A) (A) (A) (A) (A) (A) (A) (A)
                 (A) (A) (A) (A) (A) (A) (A) (A) (A) (A) (A) (A)
                 (A) (A) (A) (A) (A) (A) (A) (A) (A) (A) (A) (A)
                 (A) (A) (A) (A) (A) (A) (A) (A) (A) (A) (A) (A)
                 (A) (A) (A) (A) (A) (A) (A) (A) (A)
 Harris functional with IExCor=  402 diagonalized for initial guess.
 ExpMin= 9.52D-02 ExpMax= 2.70D+04 ExpMxC= 9.22D+02 IAcc=3 IRadAn=         5 AccDes= 0.00D+00
 HarFok:  IExCor= 402 AccDes= 0.00D+00 IRadAn=         5 IDoV=1
 ScaDFX=  1.000000  1.000000  1.000000  1.000000
 Requested convergence on RMS density matrix=1.00D-08 within 128 cycles.
 Requested convergence on MAX density matrix=1.00D-06.
 Requested convergence on             energy=1.00D-06.
 No special actions if energy rises.
 Keep R1 integrals in memory in canonical form, NReq=     5319061.
 Integral accuracy reduced to 1.0D-05 until final iterations.
 Initial convergence to 1.0D-05 achieved.  Increase integral accuracy.
 SCF Done:  E(RB+HF-LYP) =  -189.839066778     A.U. after   11 cycles
             Convg  =    0.6317D-08             -V/T =  2.0040
             S**2   =   0.0000
 Range of M.O.s used for correlation:     1    69
 NBasis=    69 NAE=    12 NBE=    12 NFC=     0 NFV=     0
 NROrb=     69 NOA=    12 NOB=    12 NVA=    57 NVB=    57
 Symmetrizing basis deriv contribution to polar:
 IMax=3 JMax=2 DiffMx= 0.00D+00
 G2DrvN: will do    6 centers at a time, making    1 passes doing MaxLOS=2.
 FoFDir/FoFCou used for L=0 through L=2.
 DoAtom=TTTTT
          Differentiating once with respect to electric field.
                with respect to dipole field.
          Differentiating once with respect to nuclear coordinates.
          Store integrals in memory, NReq=     4276606.
          There are  18 degrees of freedom in the 1st order CPHF.
    15 vectors were produced by pass  0.
 AX will form  15 AO Fock derivatives at one time.
    15 vectors were produced by pass  1.
    15 vectors were produced by pass  2.
    15 vectors were produced by pass  3.
    15 vectors were produced by pass  4.
    14 vectors were produced by pass  5.
     4 vectors were produced by pass  6.
 Inv2:  IOpt= 1 Iter= 1 AM= 1.25D-15 Conv= 1.00D-12.
 Inverted reduced A of dimension   93 with in-core refinement.
 Isotropic polarizability for W=    0.000000       19.08 Bohr**3.
 End of Minotr Frequency-dependent properties file   721 does not exist.
 ***** Axes restored to original set *****
 -------------------------------------------------------------------
 Center     Atomic                   Forces (Hartrees/Bohr)
 Number     Number              X              Y              Z
 -------------------------------------------------------------------
    1          6           0.000540611    0.000491626   -0.000460221
    2          1           0.000527132    0.000341713   -0.000328638
    3          8           0.000508299    0.000168455    0.000504605
    4          8          -0.001317527   -0.001069668    0.000184609
    5          1          -0.000258515    0.000067875    0.000099645
 -------------------------------------------------------------------
 Cartesian Forces:  Max     0.001317527 RMS     0.000564818

 GradGradGradGradGradGradGradGradGradGradGradGradGradGradGradGradGradGrad
 Berny optimization.
 Internal  Forces:  Max     0.001855886 RMS     0.000697156
 Search for a local minimum.
 Step number   2 out of a maximum of  20
 All quantities printed in internal units (Hartrees-Bohrs-Radians)
 Second derivative matrix not updated -- analytic derivatives used.
 Trust test= 9.57D-01 RLast= 1.77D-01 DXMaxT set to 4.24D-01
 The second derivative matrix:
                          R1        R2        R3        R4        A1
           R1           0.33197
           R2           0.02525   0.88464
           R3           0.01480   0.08975   0.40356
           R4          -0.00126  -0.00512   0.01267   0.49709
           A1           0.00185   0.00929  -0.03664   0.00261   0.11703
           A2           0.01249  -0.04443   0.02195   0.00904  -0.02934
           A3          -0.01433   0.03513   0.01469  -0.01165  -0.08769
           A4           0.00374   0.00325   0.03326   0.02678   0.00428
           D1           0.00001  -0.00010   0.00012  -0.00005  -0.00001
           D2           0.00003  -0.00001   0.00029  -0.00003  -0.00008
                          A2        A3        A4        D1        D2
           A2           0.12412
           A3          -0.09477   0.18246
           A4           0.02721  -0.03149   0.17006
           D1           0.00005  -0.00018   0.00002   0.09923
           D2           0.00002   0.00020   0.00023  -0.07735   0.09867
     Eigenvalues ---    0.02160   0.13502   0.15413   0.17630   0.27497
     Eigenvalues ---    0.33638   0.40065   0.50318   0.906591000.00000
 RFO step:  Lambda=-1.06657163D-05.
 Quintic linear search produced a step of -0.03228.
 Iteration  1 RMS(Cart)=  0.00346533 RMS(Int)=  0.00001230
 Iteration  2 RMS(Cart)=  0.00001123 RMS(Int)=  0.00000006
 Iteration  3 RMS(Cart)=  0.00000000 RMS(Int)=  0.00000006
 Variable       Old X    -DE/DX   Delta X   Delta X   Delta X     New X
                                 (Linear)    (Quad)   (Total)
    R1        2.07125   0.00053   0.00080   0.00051   0.00131   2.07256
    R2        2.26390   0.00071   0.00067  -0.00013   0.00053   2.26443
    R3        2.53955   0.00186   0.00133   0.00288   0.00420   2.54375
    R4        1.83639   0.00016  -0.00011   0.00029   0.00018   1.83657
    A1        2.18762  -0.00044  -0.00066  -0.00162  -0.00228   2.18534
    A2        1.90992   0.00052   0.00238   0.00029   0.00268   1.91260
    A3        2.18564  -0.00008  -0.00172   0.00132  -0.00040   2.18525
    A4        1.88400   0.00026   0.00044  -0.00020   0.00024   1.88424
    D1        3.13454   0.00009  -0.00321   0.01105   0.00784  -3.14081
    D2       -0.00789   0.00023  -0.00320   0.01191   0.00870   0.00081
         Item               Value     Threshold  Converged?
 Maximum Force            0.001856     0.000002     NO 
 RMS     Force            0.000697     0.000001     NO 
 Maximum Displacement     0.006901     0.000006     NO 
 RMS     Displacement     0.003465     0.000004     NO 
 Predicted change in Energy=-6.752236D-06
 GradGradGradGradGradGradGradGradGradGradGradGradGradGradGradGradGradGrad

                          Input orientation:                          
 ---------------------------------------------------------------------
 Center     Atomic     Atomic              Coordinates (Angstroms)
 Number     Number      Type              X           Y           Z
 ---------------------------------------------------------------------
    1          6             0        0.135555    0.363754    0.022678
    2          1             0        0.499114    0.531438   -0.998387
    3          8             0        0.690136    0.724989    1.021596
    4          8             0       -1.029058   -0.310031   -0.018009
    5          1             0       -1.329401   -0.444793    0.896413
 ---------------------------------------------------------------------
                    Distance matrix (angstroms):
                    1          2          3          4          5
     1  C    0.000000
     2  H    1.096753   0.000000
     3  O    1.198285   2.038206   0.000000
     4  O    1.346093   2.001130   2.260016   0.000000
     5  H    1.887659   2.808338   2.337218   0.971871   0.000000
 Stoichiometry    CH2O2
 Framework group  C1[X(CH2O2)]
 Deg. of freedom     9
 Full point group                 C1
 Largest Abelian subgroup         C1      NOp   1
 Largest concise Abelian subgroup C1      NOp   1
                         Standard orientation:                         
 ---------------------------------------------------------------------
 Center     Atomic     Atomic              Coordinates (Angstroms)
 Number     Number      Type              X           Y           Z
 ---------------------------------------------------------------------
    1          6             0        0.136882    0.398311    0.000043
    2          1             0        0.105871    1.494626    0.000200
    3          8             0        1.135067   -0.264646   -0.000033
    4          8             0       -1.118079   -0.088557   -0.000087
    5          1             0       -1.063068   -1.058870    0.000503
 ---------------------------------------------------------------------
 Rotational constants (GHZ):     77.9687936     12.0319037     10.4233974
 Standard basis: TZVP (5D, 7F)
 There are    69 symmetry adapted basis functions of A   symmetry.
 Integral buffers will be    131072 words long.
 Raffenetti 2 integral format.
 Two-electron integral symmetry is turned on.
    69 basis functions,   121 primitive gaussians,    72 cartesian basis functions
    12 alpha electrons       12 beta electrons
       nuclear repulsion energy        70.1778337493 Hartrees.
 NAtoms=    5 NActive=    5 NUniq=    5 SFac= 7.50D-01 NAtFMM=   80 NAOKFM=F Big=F
 One-electron integrals computed using PRISM.
 NBasis=    69 RedAO= T  NBF=    69
 NBsUse=    69 1.00D-06 NBFU=    69
 Initial guess read from the read-write file:
 Initial guess orbital symmetries:
       Occupied  (A) (A) (A) (A) (A) (A) (A) (A) (A) (A) (A) (A)
       Virtual   (A) (A) (A) (A) (A) (A) (A) (A) (A) (A) (A) (A)
                 (A) (A) (A) (A) (A) (A) (A) (A) (A) (A) (A) (A)
                 (A) (A) (A) (A) (A) (A) (A) (A) (A) (A) (A) (A)
                 (A) (A) (A) (A) (A) (A) (A) (A) (A) (A) (A) (A)
                 (A) (A) (A) (A) (A) (A) (A) (A) (A)
 Requested convergence on RMS density matrix=1.00D-08 within 128 cycles.
 Requested convergence on MAX density matrix=1.00D-06.
 Requested convergence on             energy=1.00D-06.
 No special actions if energy rises.
 Keep R1 integrals in memory in canonical form, NReq=     5319061.
 SCF Done:  E(RB+HF-LYP) =  -189.839073565     A.U. after   12 cycles
             Convg  =    0.3090D-08             -V/T =  2.0040
             S**2   =   0.0000
 Range of M.O.s used for correlation:     1    69
 NBasis=    69 NAE=    12 NBE=    12 NFC=     0 NFV=     0
 NROrb=     69 NOA=    12 NOB=    12 NVA=    57 NVB=    57
 Symmetrizing basis deriv contribution to polar:
 IMax=3 JMax=2 DiffMx= 0.00D+00
 G2DrvN: will do    6 centers at a time, making    1 passes doing MaxLOS=2.
 FoFDir/FoFCou used for L=0 through L=2.
 DoAtom=TTTTT
          Differentiating once with respect to electric field.
                with respect to dipole field.
          Differentiating once with respect to nuclear coordinates.
          Store integrals in memory, NReq=     4276606.
          There are  18 degrees of freedom in the 1st order CPHF.
    15 vectors were produced by pass  0.
 AX will form  15 AO Fock derivatives at one time.
    15 vectors were produced by pass  1.
    15 vectors were produced by pass  2.
    15 vectors were produced by pass  3.
    15 vectors were produced by pass  4.
    14 vectors were produced by pass  5.
     4 vectors were produced by pass  6.
 Inv2:  IOpt= 1 Iter= 1 AM= 1.37D-15 Conv= 1.00D-12.
 Inverted reduced A of dimension   93 with in-core refinement.
 Isotropic polarizability for W=    0.000000       19.09 Bohr**3.
 End of Minotr Frequency-dependent properties file   721 does not exist.
 ***** Axes restored to original set *****
 -------------------------------------------------------------------
 Center     Atomic                   Forces (Hartrees/Bohr)
 Number     Number              X              Y              Z
 -------------------------------------------------------------------
    1          6          -0.000005666   -0.000015158    0.000006402
    2          1          -0.000007019   -0.000012505    0.000009064
    3          8          -0.000019286    0.000000448   -0.000013248
    4          8           0.000018264    0.000042180    0.000001622
    5          1           0.000013707   -0.000014965   -0.000003841
 -------------------------------------------------------------------
 Cartesian Forces:  Max     0.000042180 RMS     0.000015664

 GradGradGradGradGradGradGradGradGradGradGradGradGradGradGradGradGradGrad
 Berny optimization.
 Internal  Forces:  Max     0.000041268 RMS     0.000017581
 Search for a local minimum.
 Step number   3 out of a maximum of  20
 All quantities printed in internal units (Hartrees-Bohrs-Radians)
 Second derivative matrix not updated -- analytic derivatives used.
 Trust test= 1.01D+00 RLast= 1.30D-02 DXMaxT set to 4.24D-01
 The second derivative matrix:
                          R1        R2        R3        R4        A1
           R1           0.33066
           R2           0.02523   0.88255
           R3           0.01456   0.08948   0.39739
           R4          -0.00126  -0.00510   0.01245   0.49680
           A1           0.00195   0.00955  -0.03636   0.00263   0.11696
           A2           0.01227  -0.04436   0.02167   0.00893  -0.02923
           A3          -0.01422   0.03481   0.01469  -0.01156  -0.08773
           A4           0.00373   0.00328   0.03316   0.02659   0.00428
           D1           0.00000   0.00001  -0.00002   0.00001   0.00000
           D2           0.00000   0.00000  -0.00003   0.00000   0.00001
                          A2        A3        A4        D1        D2
           A2           0.12345
           A3          -0.09422   0.18196
           A4           0.02720  -0.03148   0.16959
           D1          -0.00001   0.00001   0.00000   0.09869
           D2           0.00000  -0.00001  -0.00002  -0.07696   0.09814
     Eigenvalues ---    0.02145   0.13446   0.15363   0.17537   0.27429
     Eigenvalues ---    0.33498   0.39513   0.50262   0.904261000.00000
 RFO step:  Lambda=-1.39814658D-08.
 Quintic linear search produced a step of -0.03635.
 Iteration  1 RMS(Cart)=  0.00026309 RMS(Int)=  0.00000011
 Iteration  2 RMS(Cart)=  0.00000011 RMS(Int)=  0.00000000
 Variable       Old X    -DE/DX   Delta X   Delta X   Delta X     New X
                                 (Linear)    (Quad)   (Total)
    R1        2.07256  -0.00001  -0.00005   0.00002  -0.00003   2.07253
    R2        2.26443  -0.00002  -0.00002   0.00001  -0.00001   2.26442
    R3        2.54375  -0.00004  -0.00015   0.00006  -0.00009   2.54366
    R4        1.83657  -0.00001  -0.00001   0.00000  -0.00001   1.83656
    A1        2.18534   0.00001   0.00008  -0.00004   0.00005   2.18539
    A2        1.91260  -0.00001  -0.00010   0.00006  -0.00004   1.91256
    A3        2.18525   0.00000   0.00001  -0.00003  -0.00001   2.18523
    A4        1.88424   0.00000  -0.00001   0.00000  -0.00001   1.88424
    D1       -3.14081  -0.00001  -0.00028  -0.00051  -0.00079   3.14159
    D2        0.00081  -0.00002  -0.00032  -0.00050  -0.00082  -0.00001
         Item               Value     Threshold  Converged?
 Maximum Force            0.000041     0.000002     NO 
 RMS     Force            0.000018     0.000001     NO 
 Maximum Displacement     0.000530     0.000006     NO 
 RMS     Displacement     0.000263     0.000004     NO 
 Predicted change in Energy=-1.646182D-08
 GradGradGradGradGradGradGradGradGradGradGradGradGradGradGradGradGradGrad

                          Input orientation:                          
 ---------------------------------------------------------------------
 Center     Atomic     Atomic              Coordinates (Angstroms)
 Number     Number      Type              X           Y           Z
 ---------------------------------------------------------------------
    1          6             0        0.135527    0.363789    0.022679
    2          1             0        0.499159    0.531278   -0.998374
    3          8             0        0.690073    0.725032    1.021603
    4          8             0       -1.029173   -0.309751   -0.018028
    5          1             0       -1.329239   -0.444992    0.896409
 ---------------------------------------------------------------------
                    Distance matrix (angstroms):
                    1          2          3          4          5
     1  C    0.000000
     2  H    1.096736   0.000000
     3  O    1.198277   2.038209   0.000000
     4  O    1.346045   2.001051   2.259959   0.000000
     5  H    1.887609   2.808263   2.337146   0.971867   0.000000
 Stoichiometry    CH2O2
 Framework group  C1[X(CH2O2)]
 Deg. of freedom     9
 Full point group                 C1
 Largest Abelian subgroup         C1      NOp   1
 Largest concise Abelian subgroup C1      NOp   1
                         Standard orientation:                         
 ---------------------------------------------------------------------
 Center     Atomic     Atomic              Coordinates (Angstroms)
 Number     Number      Type              X           Y           Z
 ---------------------------------------------------------------------
    1          6             0       -0.136862    0.398311    0.000000
    2          1             0       -0.105789    1.494607    0.000002
    3          8             0       -1.135048   -0.264632    0.000000
    4          8             0        1.118043   -0.088568   -0.000001
    5          1             0        1.063004   -1.058874    0.000004
 ---------------------------------------------------------------------
 Rotational constants (GHZ):     77.9703324     12.0325371     10.4239001
 Standard basis: TZVP (5D, 7F)
 There are    69 symmetry adapted basis functions of A   symmetry.
 Integral buffers will be    131072 words long.
 Raffenetti 2 integral format.
 Two-electron integral symmetry is turned on.
    69 basis functions,   121 primitive gaussians,    72 cartesian basis functions
    12 alpha electrons       12 beta electrons
       nuclear repulsion energy        70.1792684860 Hartrees.
 NAtoms=    5 NActive=    5 NUniq=    5 SFac= 7.50D-01 NAtFMM=   80 NAOKFM=F Big=F
 One-electron integrals computed using PRISM.
 NBasis=    69 RedAO= T  NBF=    69
 NBsUse=    69 1.00D-06 NBFU=    69
 Initial guess read from the read-write file:
 Initial guess orbital symmetries:
       Occupied  (A) (A) (A) (A) (A) (A) (A) (A) (A) (A) (A) (A)
       Virtual   (A) (A) (A) (A) (A) (A) (A) (A) (A) (A) (A) (A)
                 (A) (A) (A) (A) (A) (A) (A) (A) (A) (A) (A) (A)
                 (A) (A) (A) (A) (A) (A) (A) (A) (A) (A) (A) (A)
                 (A) (A) (A) (A) (A) (A) (A) (A) (A) (A) (A) (A)
                 (A) (A) (A) (A) (A) (A) (A) (A) (A)
 Requested convergence on RMS density matrix=1.00D-08 within 128 cycles.
 Requested convergence on MAX density matrix=1.00D-06.
 Requested convergence on             energy=1.00D-06.
 No special actions if energy rises.
 Keep R1 integrals in memory in canonical form, NReq=     5319061.
 SCF Done:  E(RB+HF-LYP) =  -189.839073582     A.U. after   12 cycles
             Convg  =    0.3112D-08             -V/T =  2.0040
             S**2   =   0.0000
 Range of M.O.s used for correlation:     1    69
 NBasis=    69 NAE=    12 NBE=    12 NFC=     0 NFV=     0
 NROrb=     69 NOA=    12 NOB=    12 NVA=    57 NVB=    57
 Symmetrizing basis deriv contribution to polar:
 IMax=3 JMax=2 DiffMx= 0.00D+00
 G2DrvN: will do    6 centers at a time, making    1 passes doing MaxLOS=2.
 FoFDir/FoFCou used for L=0 through L=2.
 DoAtom=TTTTT
          Differentiating once with respect to electric field.
                with respect to dipole field.
          Differentiating once with respect to nuclear coordinates.
          Store integrals in memory, NReq=     4276606.
          There are  18 degrees of freedom in the 1st order CPHF.
    15 vectors were produced by pass  0.
 AX will form  15 AO Fock derivatives at one time.
    15 vectors were produced by pass  1.
    15 vectors were produced by pass  2.
    15 vectors were produced by pass  3.
    15 vectors were produced by pass  4.
    14 vectors were produced by pass  5.
     4 vectors were produced by pass  6.
 Inv2:  IOpt= 1 Iter= 1 AM= 1.41D-15 Conv= 1.00D-12.
 Inverted reduced A of dimension   93 with in-core refinement.
 Isotropic polarizability for W=    0.000000       19.09 Bohr**3.
 End of Minotr Frequency-dependent properties file   721 does not exist.
 ***** Axes restored to original set *****
 -------------------------------------------------------------------
 Center     Atomic                   Forces (Hartrees/Bohr)
 Number     Number              X              Y              Z
 -------------------------------------------------------------------
    1          6          -0.000000387   -0.000000170    0.000000036
    2          1           0.000000034    0.000000101    0.000000104
    3          8          -0.000000038   -0.000000094    0.000000076
    4          8           0.000000495    0.000000062   -0.000000092
    5          1          -0.000000104    0.000000101   -0.000000125
 -------------------------------------------------------------------
 Cartesian Forces:  Max     0.000000495 RMS     0.000000185

 GradGradGradGradGradGradGradGradGradGradGradGradGradGradGradGradGradGrad
 Berny optimization.
 Internal  Forces:  Max     0.000000465 RMS     0.000000159
 Search for a local minimum.
 Step number   4 out of a maximum of  20
 All quantities printed in internal units (Hartrees-Bohrs-Radians)
 Second derivative matrix not updated -- analytic derivatives used.
 Trust test= 9.98D-01 RLast= 1.15D-03 DXMaxT set to 4.24D-01
 The second derivative matrix:
                          R1        R2        R3        R4        A1
           R1           0.33069
           R2           0.02523   0.88261
           R3           0.01457   0.08949   0.39752
           R4          -0.00126  -0.00510   0.01245   0.49682
           A1           0.00195   0.00954  -0.03637   0.00263   0.11696
           A2           0.01227  -0.04436   0.02167   0.00893  -0.02923
           A3          -0.01422   0.03482   0.01470  -0.01156  -0.08774
           A4           0.00373   0.00328   0.03316   0.02659   0.00428
           D1           0.00000   0.00000   0.00000   0.00000   0.00000
           D2           0.00000   0.00000   0.00000   0.00000   0.00000
                          A2        A3        A4        D1        D2
           A2           0.12346
           A3          -0.09424   0.18197
           A4           0.02720  -0.03148   0.16960
           D1           0.00000   0.00000   0.00000   0.09870
           D2           0.00000   0.00000   0.00000  -0.07697   0.09815
     Eigenvalues ---    0.02146   0.13447   0.15364   0.17539   0.27431
     Eigenvalues ---    0.33502   0.39524   0.50264   0.904321000.00000
 RFO step:  Lambda= 0.00000000D+00.
 Quintic linear search produced a step of -0.00472.
 Iteration  1 RMS(Cart)=  0.00000192 RMS(Int)=  0.00000000
 Iteration  2 RMS(Cart)=  0.00000000 RMS(Int)=  0.00000000
 Variable       Old X    -DE/DX   Delta X   Delta X   Delta X     New X
                                 (Linear)    (Quad)   (Total)
    R1        2.07253   0.00000   0.00000   0.00000   0.00000   2.07253
    R2        2.26442   0.00000   0.00000   0.00000   0.00000   2.26442
    R3        2.54366   0.00000   0.00000   0.00000   0.00000   2.54366
    R4        1.83656   0.00000   0.00000   0.00000   0.00000   1.83656
    A1        2.18539   0.00000   0.00000   0.00000   0.00000   2.18539
    A2        1.91256   0.00000   0.00000   0.00000   0.00000   1.91256
    A3        2.18523   0.00000   0.00000   0.00000   0.00000   2.18523
    A4        1.88424   0.00000   0.00000   0.00000   0.00000   1.88424
    D1        3.14159   0.00000   0.00000   0.00000   0.00001   3.14159
    D2       -0.00001   0.00000   0.00000   0.00000   0.00001   0.00000
         Item               Value     Threshold  Converged?
 Maximum Force            0.000000     0.000002     YES
 RMS     Force            0.000000     0.000001     YES
 Maximum Displacement     0.000003     0.000006     YES
 RMS     Displacement     0.000002     0.000004     YES
 Predicted change in Energy=-1.016045D-12
 Optimization completed.
    -- Stationary point found.
                           ----------------------------
                           !   Optimized Parameters   !
                           ! (Angstroms and Degrees)  !
 --------------------------                            --------------------------
 ! Name  Definition              Value          Derivative Info.                !
 --------------------------------------------------------------------------------
 ! R1    R(1,2)                  1.0967         -DE/DX =    0.0                 !
 ! R2    R(1,3)                  1.1983         -DE/DX =    0.0                 !
 ! R3    R(1,4)                  1.346          -DE/DX =    0.0                 !
 ! R4    R(4,5)                  0.9719         -DE/DX =    0.0                 !
 ! A1    A(2,1,3)              125.2136         -DE/DX =    0.0                 !
 ! A2    A(2,1,4)              109.5817         -DE/DX =    0.0                 !
 ! A3    A(3,1,4)              125.2047         -DE/DX =    0.0                 !
 ! A4    A(1,4,5)              107.9588         -DE/DX =    0.0                 !
 ! D1    D(2,1,4,5)            179.9997         -DE/DX =    0.0                 !
 ! D2    D(3,1,4,5)             -0.0003         -DE/DX =    0.0                 !
 --------------------------------------------------------------------------------
 GradGradGradGradGradGradGradGradGradGradGradGradGradGradGradGradGradGrad

                          Input orientation:                          
 ---------------------------------------------------------------------
 Center     Atomic     Atomic              Coordinates (Angstroms)
 Number     Number      Type              X           Y           Z
 ---------------------------------------------------------------------
    1          6             0        0.135527    0.363789    0.022679
    2          1             0        0.499159    0.531278   -0.998374
    3          8             0        0.690073    0.725032    1.021603
    4          8             0       -1.029173   -0.309751   -0.018028
    5          1             0       -1.329239   -0.444992    0.896409
 ---------------------------------------------------------------------
                    Distance matrix (angstroms):
                    1          2          3          4          5
     1  C    0.000000
     2  H    1.096736   0.000000
     3  O    1.198277   2.038209   0.000000
     4  O    1.346045   2.001051   2.259959   0.000000
     5  H    1.887609   2.808263   2.337146   0.971867   0.000000
 Stoichiometry    CH2O2
 Framework group  C1[X(CH2O2)]
 Deg. of freedom     9
 Full point group                 C1
 Largest Abelian subgroup         C1      NOp   1
 Largest concise Abelian subgroup C1      NOp   1
                         Standard orientation:                         
 ---------------------------------------------------------------------
 Center     Atomic     Atomic              Coordinates (Angstroms)
 Number     Number      Type              X           Y           Z
 ---------------------------------------------------------------------
    1          6             0       -0.136862    0.398311    0.000000
    2          1             0       -0.105789    1.494607    0.000002
    3          8             0       -1.135048   -0.264632    0.000000
    4          8             0        1.118043   -0.088568   -0.000001
    5          1             0        1.063004   -1.058874    0.000004
 ---------------------------------------------------------------------
 Rotational constants (GHZ):     77.9703324     12.0325371     10.4239001

 **********************************************************************

            Population analysis using the SCF density.

 **********************************************************************

 Orbital symmetries:
       Occupied  (A) (A) (A) (A) (A) (A) (A) (A) (A) (A) (A) (A)
       Virtual   (A) (A) (A) (A) (A) (A) (A) (A) (A) (A) (A) (A)
                 (A) (A) (A) (A) (A) (A) (A) (A) (A) (A) (A) (A)
                 (A) (A) (A) (A) (A) (A) (A) (A) (A) (A) (A) (A)
                 (A) (A) (A) (A) (A) (A) (A) (A) (A) (A) (A) (A)
                 (A) (A) (A) (A) (A) (A) (A) (A) (A)
 The electronic state is 1-A.
 Alpha  occ. eigenvalues --  -19.19635 -19.14047 -10.32184  -1.13148  -1.04645
 Alpha  occ. eigenvalues --   -0.68121  -0.53644  -0.50388  -0.46572  -0.42215
 Alpha  occ. eigenvalues --   -0.34847  -0.30784
 Alpha virt. eigenvalues --   -0.02037   0.02261   0.07470   0.12604   0.15834
 Alpha virt. eigenvalues --    0.19589   0.26632   0.30824   0.36758   0.41726
 Alpha virt. eigenvalues --    0.42611   0.45128   0.49406   0.51813   0.52467
 Alpha virt. eigenvalues --    0.57065   0.59130   0.73108   0.77777   1.23790
 Alpha virt. eigenvalues --    1.25012   1.27105   1.28740   1.33675   1.39904
 Alpha virt. eigenvalues --    1.58853   1.64201   1.69990   1.86385   1.98063
 Alpha virt. eigenvalues --    1.99682   2.05077   2.20701   2.39607   2.43754
 Alpha virt. eigenvalues --    2.53393   2.58446   2.60546   2.61195   2.63100
 Alpha virt. eigenvalues --    2.65424   2.69125   2.78409   2.88030   2.94219
 Alpha virt. eigenvalues --    2.95750   3.03358   3.06974   3.23407   3.23746
 Alpha virt. eigenvalues --    3.54783   3.84716   4.20424   4.27891  21.95598
 Alpha virt. eigenvalues --   43.27630  43.35580
          Condensed to atoms (all electrons):
              1          2          3          4          5
     1  C    4.561398   0.397163   0.562191   0.272054  -0.014887
     2  H    0.397163   0.657177  -0.062812  -0.097538   0.012635
     3  O    0.562191  -0.062812   7.920625  -0.110268   0.005513
     4  O    0.272054  -0.097538  -0.110268   7.948932   0.272225
     5  H   -0.014887   0.012635   0.005513   0.272225   0.439315
 Mulliken atomic charges:
              1
     1  C    0.222081
     2  H    0.093375
     3  O   -0.315248
     4  O   -0.285406
     5  H    0.285197
 Sum of Mulliken charges=   0.00000
 Atomic charges with hydrogens summed into heavy atoms:
              1
     1  C    0.315456
     2  H    0.000000
     3  O   -0.315248
     4  O   -0.000208
     5  H    0.000000
 Sum of Mulliken charges=   0.00000
 APT atomic charges:
              1
     1  C    1.103181
     2  H    0.009094
     3  O   -0.708332
     4  O   -0.691556
     5  H    0.287613
 Sum of APT charges=   0.00000
 APT Atomic charges with hydrogens summed into heavy atoms:
              1
     1  C    1.112275
     2  H    0.000000
     3  O   -0.708332
     4  O   -0.403944
     5  H    0.000000
 Sum of APT charges=   0.00000
 Electronic spatial extent (au):  <R**2>=   133.6185
 Charge=     0.0000 electrons
 Dipole moment (field-independent basis, Debye):
    X=     1.4894    Y=     0.1414    Z=     0.0000  Tot=     1.4961
 Quadrupole moment (field-independent basis, Debye-Ang):
   XX=   -21.6179   YY=   -13.8011   ZZ=   -17.0638
   XY=    -2.9344   XZ=     0.0000   YZ=     0.0000
 Traceless Quadrupole moment (field-independent basis, Debye-Ang):
   XX=    -4.1236   YY=     3.6931   ZZ=     0.4305
   XY=    -2.9344   XZ=     0.0000   YZ=     0.0000
 Octapole moment (field-independent basis, Debye-Ang**2):
  XXX=     2.8480  YYY=    -1.7287  ZZZ=     0.0000  XYY=     3.1738
  XXY=    -2.3881  XXZ=     0.0000  XZZ=    -0.0578  YZZ=    -0.5169
  YYZ=     0.0000  XYZ=     0.0000
 Hexadecapole moment (field-independent basis, Debye-Ang**3):
 XXXX=  -112.7538 YYYY=   -28.8340 ZZZZ=   -14.5599 XXXY=    -4.3515
 XXXZ=     0.0000 YYYX=    -4.4604 YYYZ=     0.0000 ZZZX=     0.0000
 ZZZY=     0.0000 XXYY=   -20.6626 XXZZ=   -20.4406 YYZZ=    -8.3516
 XXYZ=     0.0000 YYXZ=     0.0000 ZZXY=    -0.3421
 N-N= 7.017926848599D+01 E-N=-5.873451910435D+02  KE= 1.890768931707D+02
  Exact polarizability:  24.306   0.735  21.068   0.000   0.000  11.908
 Approx polarizability:  37.674   4.014  27.619   0.000   0.000  15.095
 Rotating derivatives to standard orientation.
 Full mass-weighted force constant matrix:
 Low frequencies ---   -0.8168   -0.0007   -0.0004    0.0016    3.1293    8.4156
 Low frequencies ---  630.3905  684.7666 1055.3077
 Diagonal vibrational polarizability:
        8.8017481       3.3427760       9.2690994
 Harmonic frequencies (cm**-1), IR intensities (KM/Mole), Raman scattering
 activities (A**4/AMU), depolarization ratios for plane and unpolarized
 incident light, reduced masses (AMU), force constants (mDyne/A),
 and normal coordinates:
                     1                      2                      3
                     A                      A                      A
 Frequencies --   630.3905               684.7666              1055.3077
 Red. masses --     3.4360                 1.2636                 1.5677
 Frc consts  --     0.8045                 0.3491                 1.0286
 IR Inten    --    44.5520               160.6337                 2.0727
 Atom AN      X      Y      Z        X      Y      Z        X      Y      Z
   1   6     0.02   0.23   0.00     0.00   0.00   0.09     0.00   0.00   0.21
   2   1    -0.09   0.23   0.00     0.00   0.00   0.19     0.00   0.00  -0.96
   3   8     0.25  -0.11   0.00     0.00   0.00  -0.05     0.00   0.00  -0.06
   4   8    -0.20  -0.08   0.00     0.00   0.00  -0.10     0.00   0.00  -0.03
   5   1    -0.87  -0.04   0.00     0.00   0.00   0.97     0.00   0.00  -0.14
                     4                      5                      6
                     A                      A                      A
 Frequencies --  1121.1010              1298.6159              1415.9052
 Red. masses --     3.4980                 1.7233                 1.1345
 Frc consts  --     2.5903                 1.7122                 1.3401
 IR Inten    --   267.5222                 9.2984                 2.7873
 Atom AN      X      Y      Z        X      Y      Z        X      Y      Z
   1   6     0.19  -0.18   0.00    -0.15   0.17   0.00    -0.02   0.02   0.00
   2   1     0.48  -0.18   0.00     0.23   0.17   0.00     0.96   0.01   0.00
   3   8     0.10   0.06   0.00     0.04  -0.03   0.00    -0.05  -0.06   0.00
   4   8    -0.31   0.09   0.00     0.00  -0.09   0.00     0.02   0.04   0.00
   5   1     0.74   0.04   0.00     0.92  -0.11   0.00    -0.26   0.05   0.00
                     7                      8                      9
                     A                      A                      A
 Frequencies --  1820.5474              3056.7156              3715.2439
 Red. masses --     8.1623                 1.0917                 1.0639
 Frc consts  --    15.9391                 6.0101                 8.6523
 IR Inten    --   366.5011                44.9420                55.6172
 Atom AN      X      Y      Z        X      Y      Z        X      Y      Z
   1   6     0.54   0.33   0.00     0.00  -0.09   0.00     0.00   0.00   0.00
   2   1    -0.34   0.41   0.00     0.01   1.00   0.00     0.00  -0.02   0.00
   3   8    -0.35  -0.24   0.00     0.00   0.00   0.00     0.00   0.00   0.00
   4   8    -0.05  -0.03   0.00     0.00   0.00   0.00     0.00   0.06   0.00
   5   1     0.37  -0.04   0.00    -0.01  -0.02   0.00    -0.03  -1.00   0.00

 -------------------
 - Thermochemistry -
 -------------------
 Temperature   298.150 Kelvin.  Pressure   1.00000 Atm.
 Atom  1 has atomic number  6 and mass  12.00000
 Atom  2 has atomic number  1 and mass   1.00783
 Atom  3 has atomic number  8 and mass  15.99491
 Atom  4 has atomic number  8 and mass  15.99491
 Atom  5 has atomic number  1 and mass   1.00783
 Molecular mass:    46.00548 amu.
 Principal axes and moments of inertia in atomic units:
                           1         2         3
     EIGENVALUES --    23.14651 149.98842 173.13493
           X            0.99937  -0.03560   0.00000
           Y            0.03560   0.99937   0.00000
           Z            0.00000   0.00000   1.00000
 This molecule is an asymmetric top.
 Rotational symmetry number  1.
 Rotational temperatures (Kelvin)      3.74198     0.57747     0.50027
 Rotational constants (GHZ):          77.97033    12.03254    10.42390
 Zero-point vibrational energy      88515.2 (Joules/Mol)
                                   21.15565 (Kcal/Mol)
 Vibrational temperatures:    906.99   985.23  1518.35  1613.01  1868.42
          (Kelvin)           2037.17  2619.36  4397.93  5345.40
 
 Zero-point correction=                           0.033714 (Hartree/Particle)
 Thermal correction to Energy=                    0.036881
 Thermal correction to Enthalpy=                  0.037825
 Thermal correction to Gibbs Free Energy=         0.009635
 Sum of electronic and zero-point Energies=           -189.805360
 Sum of electronic and thermal Energies=              -189.802192
 Sum of electronic and thermal Enthalpies=            -189.801248
 Sum of electronic and thermal Free Energies=         -189.829439
 
                     E (Thermal)             CV                S
                      KCal/Mol        Cal/Mol-Kelvin    Cal/Mol-Kelvin
 Total                   23.143              8.644             59.332
 Electronic               0.000              0.000              0.000
 Translational            0.889              2.981             37.404
 Rotational               0.889              2.981             21.024
 Vibrational             21.366              2.682              0.904
                       Q            Log10(Q)             Ln(Q)
 Total Bot       0.370058D-04         -4.431731        -10.204437
 Total V=0       0.118974D+12         11.075452         25.502171
 Vib (Bot)       0.343787D-15        -15.463710        -35.606509
 Vib (V=0)       0.110528D+01          0.043472          0.100098
 Electronic      0.100000D+01          0.000000          0.000000
 Translational   0.122651D+08          7.088670         16.322265
 Rotational      0.877628D+04          3.943310          9.079808
 ***** Axes restored to original set *****
 -------------------------------------------------------------------
 Center     Atomic                   Forces (Hartrees/Bohr)
 Number     Number              X              Y              Z
 -------------------------------------------------------------------
    1          6          -0.000000387   -0.000000170    0.000000036
    2          1           0.000000034    0.000000101    0.000000104
    3          8          -0.000000038   -0.000000094    0.000000076
    4          8           0.000000495    0.000000062   -0.000000092
    5          1          -0.000000104    0.000000101   -0.000000125
 -------------------------------------------------------------------
 Cartesian Forces:  Max     0.000000495 RMS     0.000000185
 1\1\RECHENZENTRUM RWTH AACHEN-PC-JENS\Freq\RB3LYP\TZVP\C1H2O2\JENS\17-
 Jul-2014\0\\# opt=(verytight,calcall) int=ultrafine freq b3lyp geom=co
 nnectivity tzvp\\Title Card Required\\0,1\C,0.1355265525,0.3637887322,
 0.0226792814\H,0.4991589195,0.531278251,-0.9983735895\O,0.6900730604,0
 .7250324796,1.0216034303\O,-1.02917277,-0.3097507228,-0.0180279967\H,-
 1.3292390223,-0.4449923699,0.8964087945\\Version=AM64L-G03RevE.01\Stat
 e=1-A\HF=-189.8390736\RMSD=3.112e-09\RMSF=1.847e-07\ZeroPoint=0.033713
 7\Thermal=0.0368813\Dipole=-0.4436318,-0.2674811,-0.2794427\DipoleDeri
 v=1.4601085,0.679879,0.2780833,0.6806371,0.7021706,0.1954276,0.2963974
 ,0.2059924,1.147265,0.0520547,-0.0303501,0.0401807,-0.029643,0.0910292
 ,0.0139312,0.057264,0.0237861,-0.1158016,-0.7286761,-0.2103598,-0.1230
 136,-0.2228216,-0.505194,-0.0924165,-0.4240347,-0.2660604,-0.891125,-1
 .1196572,-0.4215471,-0.1579373,-0.411761,-0.641363,-0.0875226,0.078429
 1,0.0488243,-0.3136491,0.3361702,-0.017622,-0.037313,-0.0164115,0.3533
 573,-0.0294196,-0.0080558,-0.0125423,0.1733106\Polar=20.3966341,4.9489
 339,14.8107558,1.2667685,1.1516163,22.0749912\PG=C01 [X(C1H2O2)]\NImag
 =0\\0.55164260,0.21244683,0.31771040,0.10912636,0.09602354,0.99010043,
 -0.08446920,-0.00882254,0.07529259,0.09003476,-0.00848676,-0.06719981,
 0.03543176,0.03350667,0.04365234,0.08340289,0.04011018,-0.25702593,-0.
 08449416,-0.03770377,0.29247179,-0.22668831,-0.09932792,-0.24335311,0.
 01526547,-0.00356852,-0.00207291,0.25338073,-0.09885554,-0.13570863,-0
 .16235823,-0.00438633,0.01862313,-0.00361172,0.14235992,0.11916940,-0.
 23194112,-0.15577524,-0.60290192,-0.02182745,-0.01500710,-0.03705474,0
 .30763735,0.20240626,0.63124764,-0.22224122,-0.09301762,0.00844246,-0.
 01734826,-0.01573404,0.00399573,-0.04689809,-0.04554515,-0.04895612,0.
 36076070,-0.09213560,-0.11344988,0.00198039,-0.01462157,0.00185698,0.0
 0186363,-0.04589469,0.00087129,-0.02894320,0.18070616,0.14321028,0.029
 75420,0.01427405,-0.13018773,0.03086791,0.01736478,-0.00044549,-0.0573
 9831,-0.03381309,0.01156310,-0.09836900,-0.03545829,0.55466577,-0.0182
 4387,-0.01127875,0.05049170,-0.00348277,-0.00571736,-0.00083155,0.0049
 4020,0.00642710,-0.00491266,-0.07427313,-0.02805430,0.09514520,0.09105
 958,-0.01296893,-0.00135208,0.02892254,-0.00567623,0.00306737,-0.00065
 832,0.00643121,-0.00295519,-0.00268072,-0.02640935,-0.03248867,0.03763
 255,0.03862330,0.03372857,0.00965768,0.00536746,0.00001515,0.00016110,
 -0.00008567,0.00205437,-0.00481302,-0.00262321,-0.00285407,0.13488693,
 0.06055747,-0.43559564,-0.13989268,-0.06321605,0.43638020\\0.00000039,
 0.00000017,-0.00000004,-0.00000003,-0.00000010,-0.00000010,0.00000004,
 0.00000009,-0.00000008,-0.00000049,-0.00000006,0.00000009,0.00000010,-
 0.00000010,0.00000012\\\@


 IT IS THE GODS' CUSTOM TO BRING LOW ALL THINGS OF SURPASSING GREATNESS.
     -- HERODOTUS
 IT IS THE LOFTY PINE THAT BY THE STORM IS OFTENER TOSSED;
 TOWERS FALL WITH HEAVIER CRASH WHICH HIGHER SOAR.
     -- HORACE
 THE BIGGER THEY COME, THE HARDER THEY FALL.
     -- BOB FITZSIMONS HEAVYWEIGHT CHAMPION, 1897-1899
 Job cpu time:  0 days  0 hours  6 minutes 49.5 seconds.
 File lengths (MBytes):  RWF=     17 Int=      0 D2E=      0 Chk=      6 Scr=      1
 Normal termination of Gaussian 03 at Thu Jul 17 16:53:16 2014.
 Link1:  Proceeding to internal job step number  2.
 --------------------------------------------------------------
 #N Geom=AllCheck Guess=Read SCRF=Check GenChk RB3LYP/TZVP Freq
 --------------------------------------------------------------
 1/7=1,10=4,29=7,30=1,38=1,40=1,46=1/1,3;
 2/40=1/2;
 3/5=19,7=101,11=2,16=1,25=1,30=1,70=2,71=2,74=-5,75=5/1,2,3;
 4/5=1,7=1/1;
 5/5=2,38=6/2;
 8/6=4,10=90,11=11/1;
 11/6=1,8=1,9=11,15=111,16=1/1,2,10;
 10/6=1/2;
 6/7=2,8=2,9=2,10=2,18=1,28=1/1;
 7/8=1,10=1,25=1/1,2,3,16;
 1/10=4,30=1,46=1/3;
 99//99;
 -------------------
 Title Card Required
 -------------------
 Redundant internal coordinates taken from checkpoint file:
 HCOOH_geopt_B3LYP_TZVP_correct_conf.chk
 Charge =  0 Multiplicity = 1
 C,0,0.1355265525,0.3637887322,0.0226792814
 H,0,0.4991589195,0.531278251,-0.9983735895
 O,0,0.6900730604,0.7250324796,1.0216034303
 O,0,-1.02917277,-0.3097507228,-0.0180279967
 H,0,-1.3292390223,-0.4449923699,0.8964087945
 Recover connectivity data from disk.

 GradGradGradGradGradGradGradGradGradGradGradGradGradGradGradGradGradGrad
 Berny optimization.
 Initialization pass.
                           ----------------------------
                           !    Initial Parameters    !
                           ! (Angstroms and Degrees)  !
 --------------------------                            --------------------------
 ! Name  Definition              Value          Derivative Info.                !
 --------------------------------------------------------------------------------
 ! R1    R(1,2)                  1.0967         calculate D2E/DX2 analytically  !
 ! R2    R(1,3)                  1.1983         calculate D2E/DX2 analytically  !
 ! R3    R(1,4)                  1.346          calculate D2E/DX2 analytically  !
 ! R4    R(4,5)                  0.9719         calculate D2E/DX2 analytically  !
 ! A1    A(2,1,3)              125.2136         calculate D2E/DX2 analytically  !
 ! A2    A(2,1,4)              109.5817         calculate D2E/DX2 analytically  !
 ! A3    A(3,1,4)              125.2047         calculate D2E/DX2 analytically  !
 ! A4    A(1,4,5)              107.9588         calculate D2E/DX2 analytically  !
 ! D1    D(2,1,4,5)            179.9997         calculate D2E/DX2 analytically  !
 ! D2    D(3,1,4,5)             -0.0003         calculate D2E/DX2 analytically  !
 --------------------------------------------------------------------------------
 Trust Radius=3.00D-01 FncErr=1.00D-07 GrdErr=1.00D-07
 Number of steps in this run=   2 maximum allowed number of steps=   2.
 GradGradGradGradGradGradGradGradGradGradGradGradGradGradGradGradGradGrad

                          Input orientation:                          
 ---------------------------------------------------------------------
 Center     Atomic     Atomic              Coordinates (Angstroms)
 Number     Number      Type              X           Y           Z
 ---------------------------------------------------------------------
    1          6             0        0.135527    0.363789    0.022679
    2          1             0        0.499159    0.531278   -0.998374
    3          8             0        0.690073    0.725032    1.021603
    4          8             0       -1.029173   -0.309751   -0.018028
    5          1             0       -1.329239   -0.444992    0.896409
 ---------------------------------------------------------------------
                    Distance matrix (angstroms):
                    1          2          3          4          5
     1  C    0.000000
     2  H    1.096736   0.000000
     3  O    1.198277   2.038209   0.000000
     4  O    1.346045   2.001051   2.259959   0.000000
     5  H    1.887609   2.808263   2.337146   0.971867   0.000000
 Stoichiometry    CH2O2
 Framework group  C1[X(CH2O2)]
 Deg. of freedom     9
 Full point group                 C1
 Largest Abelian subgroup         C1      NOp   1
 Largest concise Abelian subgroup C1      NOp   1
                         Standard orientation:                         
 ---------------------------------------------------------------------
 Center     Atomic     Atomic              Coordinates (Angstroms)
 Number     Number      Type              X           Y           Z
 ---------------------------------------------------------------------
    1          6             0       -0.136862    0.398311    0.000000
    2          1             0       -0.105789    1.494607    0.000002
    3          8             0       -1.135048   -0.264632    0.000000
    4          8             0        1.118043   -0.088568   -0.000001
    5          1             0        1.063004   -1.058874    0.000004
 ---------------------------------------------------------------------
 Rotational constants (GHZ):     77.9703324     12.0325371     10.4239001
 Standard basis: TZVP (5D, 7F)
 There are    69 symmetry adapted basis functions of A   symmetry.
 Integral buffers will be    131072 words long.
 Raffenetti 2 integral format.
 Two-electron integral symmetry is turned on.
    69 basis functions,   121 primitive gaussians,    72 cartesian basis functions
    12 alpha electrons       12 beta electrons
       nuclear repulsion energy        70.1792684860 Hartrees.
 NAtoms=    5 NActive=    5 NUniq=    5 SFac= 7.50D-01 NAtFMM=   80 NAOKFM=F Big=F
 One-electron integrals computed using PRISM.
 NBasis=    69 RedAO= T  NBF=    69
 NBsUse=    69 1.00D-06 NBFU=    69
 Initial guess read from the checkpoint file:
 HCOOH_geopt_B3LYP_TZVP_correct_conf.chk
 Initial guess orbital symmetries:
       Occupied  (A) (A) (A) (A) (A) (A) (A) (A) (A) (A) (A) (A)
       Virtual   (A) (A) (A) (A) (A) (A) (A) (A) (A) (A) (A) (A)
                 (A) (A) (A) (A) (A) (A) (A) (A) (A) (A) (A) (A)
                 (A) (A) (A) (A) (A) (A) (A) (A) (A) (A) (A) (A)
                 (A) (A) (A) (A) (A) (A) (A) (A) (A) (A) (A) (A)
                 (A) (A) (A) (A) (A) (A) (A) (A) (A)
 Requested convergence on RMS density matrix=1.00D-08 within 128 cycles.
 Requested convergence on MAX density matrix=1.00D-06.
 Requested convergence on             energy=1.00D-06.
 No special actions if energy rises.
 Keep R1 integrals in memory in canonical form, NReq=     5319061.
 SCF Done:  E(RB+HF-LYP) =  -189.839073582     A.U. after    1 cycles
             Convg  =    0.6583D-09             -V/T =  2.0040
             S**2   =   0.0000
 Range of M.O.s used for correlation:     1    69
 NBasis=    69 NAE=    12 NBE=    12 NFC=     0 NFV=     0
 NROrb=     69 NOA=    12 NOB=    12 NVA=    57 NVB=    57
 Symmetrizing basis deriv contribution to polar:
 IMax=3 JMax=2 DiffMx= 0.00D+00
 G2DrvN: will do    6 centers at a time, making    1 passes doing MaxLOS=2.
 FoFDir/FoFCou used for L=0 through L=2.
 DoAtom=TTTTT
          Differentiating once with respect to electric field.
                with respect to dipole field.
          Differentiating once with respect to nuclear coordinates.
          Store integrals in memory, NReq=     4276606.
          There are  18 degrees of freedom in the 1st order CPHF.
    15 vectors were produced by pass  0.
 AX will form  15 AO Fock derivatives at one time.
    15 vectors were produced by pass  1.
    15 vectors were produced by pass  2.
    15 vectors were produced by pass  3.
    15 vectors were produced by pass  4.
    14 vectors were produced by pass  5.
     4 vectors were produced by pass  6.
 Inv2:  IOpt= 1 Iter= 1 AM= 1.18D-15 Conv= 1.00D-12.
 Inverted reduced A of dimension   93 with in-core refinement.
 Isotropic polarizability for W=    0.000000       19.09 Bohr**3.
 End of Minotr Frequency-dependent properties file   721 does not exist.

 **********************************************************************

            Population analysis using the SCF density.

 **********************************************************************

 Orbital symmetries:
       Occupied  (A) (A) (A) (A) (A) (A) (A) (A) (A) (A) (A) (A)
       Virtual   (A) (A) (A) (A) (A) (A) (A) (A) (A) (A) (A) (A)
                 (A) (A) (A) (A) (A) (A) (A) (A) (A) (A) (A) (A)
                 (A) (A) (A) (A) (A) (A) (A) (A) (A) (A) (A) (A)
                 (A) (A) (A) (A) (A) (A) (A) (A) (A) (A) (A) (A)
                 (A) (A) (A) (A) (A) (A) (A) (A) (A)
 The electronic state is 1-A.
 Alpha  occ. eigenvalues --  -19.19635 -19.14047 -10.32184  -1.13148  -1.04645
 Alpha  occ. eigenvalues --   -0.68121  -0.53644  -0.50388  -0.46572  -0.42215
 Alpha  occ. eigenvalues --   -0.34847  -0.30784
 Alpha virt. eigenvalues --   -0.02037   0.02261   0.07470   0.12604   0.15834
 Alpha virt. eigenvalues --    0.19589   0.26632   0.30824   0.36758   0.41726
 Alpha virt. eigenvalues --    0.42611   0.45128   0.49406   0.51813   0.52467
 Alpha virt. eigenvalues --    0.57065   0.59130   0.73108   0.77777   1.23790
 Alpha virt. eigenvalues --    1.25012   1.27105   1.28740   1.33675   1.39904
 Alpha virt. eigenvalues --    1.58853   1.64201   1.69990   1.86385   1.98063
 Alpha virt. eigenvalues --    1.99682   2.05077   2.20701   2.39607   2.43754
 Alpha virt. eigenvalues --    2.53393   2.58446   2.60546   2.61195   2.63100
 Alpha virt. eigenvalues --    2.65424   2.69125   2.78409   2.88030   2.94219
 Alpha virt. eigenvalues --    2.95750   3.03358   3.06974   3.23407   3.23746
 Alpha virt. eigenvalues --    3.54783   3.84716   4.20424   4.27891  21.95598
 Alpha virt. eigenvalues --   43.27630  43.35580
          Condensed to atoms (all electrons):
              1          2          3          4          5
     1  C    4.561398   0.397163   0.562191   0.272054  -0.014887
     2  H    0.397163   0.657177  -0.062812  -0.097538   0.012635
     3  O    0.562191  -0.062812   7.920625  -0.110268   0.005513
     4  O    0.272054  -0.097538  -0.110268   7.948932   0.272225
     5  H   -0.014887   0.012635   0.005513   0.272225   0.439315
 Mulliken atomic charges:
              1
     1  C    0.222081
     2  H    0.093375
     3  O   -0.315248
     4  O   -0.285406
     5  H    0.285197
 Sum of Mulliken charges=   0.00000
 Atomic charges with hydrogens summed into heavy atoms:
              1
     1  C    0.315456
     2  H    0.000000
     3  O   -0.315248
     4  O   -0.000208
     5  H    0.000000
 Sum of Mulliken charges=   0.00000
 APT atomic charges:
              1
     1  C    1.103181
     2  H    0.009094
     3  O   -0.708332
     4  O   -0.691556
     5  H    0.287613
 Sum of APT charges=   0.00000
 APT Atomic charges with hydrogens summed into heavy atoms:
              1
     1  C    1.112275
     2  H    0.000000
     3  O   -0.708332
     4  O   -0.403944
     5  H    0.000000
 Sum of APT charges=   0.00000
 Electronic spatial extent (au):  <R**2>=   133.6185
 Charge=     0.0000 electrons
 Dipole moment (field-independent basis, Debye):
    X=     1.4894    Y=     0.1414    Z=     0.0000  Tot=     1.4961
 Quadrupole moment (field-independent basis, Debye-Ang):
   XX=   -21.6179   YY=   -13.8011   ZZ=   -17.0638
   XY=    -2.9344   XZ=     0.0000   YZ=     0.0000
 Traceless Quadrupole moment (field-independent basis, Debye-Ang):
   XX=    -4.1236   YY=     3.6931   ZZ=     0.4305
   XY=    -2.9344   XZ=     0.0000   YZ=     0.0000
 Octapole moment (field-independent basis, Debye-Ang**2):
  XXX=     2.8480  YYY=    -1.7287  ZZZ=     0.0000  XYY=     3.1738
  XXY=    -2.3881  XXZ=     0.0000  XZZ=    -0.0578  YZZ=    -0.5169
  YYZ=     0.0000  XYZ=     0.0000
 Hexadecapole moment (field-independent basis, Debye-Ang**3):
 XXXX=  -112.7538 YYYY=   -28.8340 ZZZZ=   -14.5599 XXXY=    -4.3515
 XXXZ=     0.0000 YYYX=    -4.4604 YYYZ=     0.0000 ZZZX=     0.0000
 ZZZY=     0.0000 XXYY=   -20.6626 XXZZ=   -20.4406 YYZZ=    -8.3516
 XXYZ=     0.0000 YYXZ=     0.0000 ZZXY=    -0.3421
 N-N= 7.017926848599D+01 E-N=-5.873451912894D+02  KE= 1.890768932860D+02
  Exact polarizability:  24.306   0.735  21.068   0.000   0.000  11.908
 Approx polarizability:  37.674   4.014  27.619   0.000   0.000  15.095
 Full mass-weighted force constant matrix:
 Low frequencies ---   -0.8147   -0.0005    0.0010    0.0013    3.1299    8.4152
 Low frequencies ---  630.3905  684.7666 1055.3078
 Diagonal vibrational polarizability:
        8.8017480       3.3427756       9.2691001
 Harmonic frequencies (cm**-1), IR intensities (KM/Mole), Raman scattering
 activities (A**4/AMU), depolarization ratios for plane and unpolarized
 incident light, reduced masses (AMU), force constants (mDyne/A),
 and normal coordinates:
                     1                      2                      3
                     A                      A                      A
 Frequencies --   630.3905               684.7666              1055.3078
 Red. masses --     3.4360                 1.2636                 1.5677
 Frc consts  --     0.8045                 0.3491                 1.0286
 IR Inten    --    44.5520               160.6337                 2.0727
 Atom AN      X      Y      Z        X      Y      Z        X      Y      Z
   1   6     0.02   0.23   0.00     0.00   0.00   0.09     0.00   0.00   0.21
   2   1    -0.09   0.23   0.00     0.00   0.00   0.19     0.00   0.00  -0.96
   3   8     0.25  -0.11   0.00     0.00   0.00  -0.05     0.00   0.00  -0.06
   4   8    -0.20  -0.08   0.00     0.00   0.00  -0.10     0.00   0.00  -0.03
   5   1    -0.87  -0.04   0.00     0.00   0.00   0.97     0.00   0.00  -0.14
                     4                      5                      6
                     A                      A                      A
 Frequencies --  1121.1010              1298.6159              1415.9052
 Red. masses --     3.4980                 1.7233                 1.1345
 Frc consts  --     2.5903                 1.7122                 1.3401
 IR Inten    --   267.5222                 9.2985                 2.7873
 Atom AN      X      Y      Z        X      Y      Z        X      Y      Z
   1   6     0.19  -0.18   0.00    -0.15   0.17   0.00    -0.02   0.02   0.00
   2   1     0.48  -0.18   0.00     0.23   0.17   0.00     0.96   0.01   0.00
   3   8     0.10   0.06   0.00     0.04  -0.03   0.00    -0.05  -0.06   0.00
   4   8    -0.31   0.09   0.00     0.00  -0.09   0.00     0.02   0.04   0.00
   5   1     0.74   0.04   0.00     0.92  -0.11   0.00    -0.26   0.05   0.00
                     7                      8                      9
                     A                      A                      A
 Frequencies --  1820.5474              3056.7156              3715.2439
 Red. masses --     8.1623                 1.0917                 1.0639
 Frc consts  --    15.9391                 6.0101                 8.6523
 IR Inten    --   366.5011                44.9420                55.6171
 Atom AN      X      Y      Z        X      Y      Z        X      Y      Z
   1   6     0.54   0.33   0.00     0.00  -0.09   0.00     0.00   0.00   0.00
   2   1    -0.34   0.41   0.00     0.01   1.00   0.00     0.00  -0.02   0.00
   3   8    -0.35  -0.24   0.00     0.00   0.00   0.00     0.00   0.00   0.00
   4   8    -0.05  -0.03   0.00     0.00   0.00   0.00     0.00   0.06   0.00
   5   1     0.37  -0.04   0.00    -0.01  -0.02   0.00    -0.03  -1.00   0.00

 -------------------
 - Thermochemistry -
 -------------------
 Temperature   298.150 Kelvin.  Pressure   1.00000 Atm.
 Atom  1 has atomic number  6 and mass  12.00000
 Atom  2 has atomic number  1 and mass   1.00783
 Atom  3 has atomic number  8 and mass  15.99491
 Atom  4 has atomic number  8 and mass  15.99491
 Atom  5 has atomic number  1 and mass   1.00783
 Molecular mass:    46.00548 amu.
 Principal axes and moments of inertia in atomic units:
                           1         2         3
     EIGENVALUES --    23.14651 149.98842 173.13493
           X            0.99937  -0.03560   0.00000
           Y            0.03560   0.99937   0.00000
           Z            0.00000   0.00000   1.00000
 This molecule is an asymmetric top.
 Rotational symmetry number  1.
 Rotational temperatures (Kelvin)      3.74198     0.57747     0.50027
 Rotational constants (GHZ):          77.97033    12.03254    10.42390
 Zero-point vibrational energy      88515.2 (Joules/Mol)
                                   21.15565 (Kcal/Mol)
 Vibrational temperatures:    906.99   985.23  1518.35  1613.01  1868.42
          (Kelvin)           2037.17  2619.36  4397.93  5345.40
 
 Zero-point correction=                           0.033714 (Hartree/Particle)
 Thermal correction to Energy=                    0.036881
 Thermal correction to Enthalpy=                  0.037825
 Thermal correction to Gibbs Free Energy=         0.009635
 Sum of electronic and zero-point Energies=           -189.805360
 Sum of electronic and thermal Energies=              -189.802192
 Sum of electronic and thermal Enthalpies=            -189.801248
 Sum of electronic and thermal Free Energies=         -189.829439
 
                     E (Thermal)             CV                S
                      KCal/Mol        Cal/Mol-Kelvin    Cal/Mol-Kelvin
 Total                   23.143              8.644             59.332
 Electronic               0.000              0.000              0.000
 Translational            0.889              2.981             37.404
 Rotational               0.889              2.981             21.024
 Vibrational             21.366              2.682              0.904
                       Q            Log10(Q)             Ln(Q)
 Total Bot       0.370058D-04         -4.431731        -10.204437
 Total V=0       0.118974D+12         11.075452         25.502171
 Vib (Bot)       0.343787D-15        -15.463711        -35.606509
 Vib (V=0)       0.110528D+01          0.043472          0.100098
 Electronic      0.100000D+01          0.000000          0.000000
 Translational   0.122651D+08          7.088670         16.322265
 Rotational      0.877628D+04          3.943310          9.079808
 ***** Axes restored to original set *****
 -------------------------------------------------------------------
 Center     Atomic                   Forces (Hartrees/Bohr)
 Number     Number              X              Y              Z
 -------------------------------------------------------------------
    1          6          -0.000000380   -0.000000166    0.000000020
    2          1           0.000000032    0.000000100    0.000000111
    3          8          -0.000000040   -0.000000095    0.000000082
    4          8           0.000000495    0.000000062   -0.000000095
    5          1          -0.000000107    0.000000099   -0.000000118
 -------------------------------------------------------------------
 Cartesian Forces:  Max     0.000000495 RMS     0.000000184

 GradGradGradGradGradGradGradGradGradGradGradGradGradGradGradGradGradGrad
 Berny optimization.
 Internal  Forces:  Max     0.000000462 RMS     0.000000158
 Search for a local minimum.
 Step number   1 out of a maximum of   2
 All quantities printed in internal units (Hartrees-Bohrs-Radians)
 Second derivative matrix not updated -- analytic derivatives used.
 The second derivative matrix:
                          R1        R2        R3        R4        A1
           R1           0.33069
           R2           0.02523   0.88261
           R3           0.01457   0.08949   0.39752
           R4          -0.00126  -0.00510   0.01245   0.49682
           A1           0.00195   0.00954  -0.03637   0.00263   0.11696
           A2           0.01227  -0.04436   0.02167   0.00893  -0.02923
           A3          -0.01422   0.03482   0.01470  -0.01156  -0.08774
           A4           0.00373   0.00328   0.03316   0.02659   0.00428
           D1           0.00000   0.00000   0.00000   0.00000   0.00000
           D2           0.00000   0.00000   0.00000   0.00000   0.00000
                          A2        A3        A4        D1        D2
           A2           0.12346
           A3          -0.09424   0.18197
           A4           0.02720  -0.03148   0.16960
           D1           0.00000   0.00000   0.00000   0.09870
           D2           0.00000   0.00000   0.00000  -0.07697   0.09815
     Eigenvalues ---    0.02146   0.13447   0.15364   0.17539   0.27431
     Eigenvalues ---    0.33502   0.39524   0.50264   0.904321000.00000
 Angle between quadratic step and forces=  60.97 degrees.
 Linear search not attempted -- first point.
 Iteration  1 RMS(Cart)=  0.00000192 RMS(Int)=  0.00000001
 Iteration  2 RMS(Cart)=  0.00000000 RMS(Int)=  0.00000000
 Variable       Old X    -DE/DX   Delta X   Delta X   Delta X     New X
                                 (Linear)    (Quad)   (Total)
    R1        2.07253   0.00000   0.00000   0.00000   0.00000   2.07253
    R2        2.26442   0.00000   0.00000   0.00000   0.00000   2.26442
    R3        2.54366   0.00000   0.00000   0.00000   0.00000   2.54366
    R4        1.83656   0.00000   0.00000   0.00000   0.00000   1.83656
    A1        2.18539   0.00000   0.00000   0.00000   0.00000   2.18539
    A2        1.91256   0.00000   0.00000   0.00000   0.00000   1.91256
    A3        2.18523   0.00000   0.00000   0.00000   0.00000   2.18523
    A4        1.88424   0.00000   0.00000   0.00000   0.00000   1.88424
    D1        3.14159   0.00000   0.00000   0.00001   0.00001  -3.14159
    D2       -0.00001   0.00000   0.00000   0.00001   0.00001   0.00000
         Item               Value     Threshold  Converged?
 Maximum Force            0.000000     0.000002     YES
 RMS     Force            0.000000     0.000001     YES
 Maximum Displacement     0.000003     0.000006     YES
 RMS     Displacement     0.000002     0.000004     YES
 Predicted change in Energy=-1.012312D-12
 Optimization completed.
    -- Stationary point found.
                           ----------------------------
                           !   Optimized Parameters   !
                           ! (Angstroms and Degrees)  !
 --------------------------                            --------------------------
 ! Name  Definition              Value          Derivative Info.                !
 --------------------------------------------------------------------------------
 ! R1    R(1,2)                  1.0967         -DE/DX =    0.0                 !
 ! R2    R(1,3)                  1.1983         -DE/DX =    0.0                 !
 ! R3    R(1,4)                  1.346          -DE/DX =    0.0                 !
 ! R4    R(4,5)                  0.9719         -DE/DX =    0.0                 !
 ! A1    A(2,1,3)              125.2136         -DE/DX =    0.0                 !
 ! A2    A(2,1,4)              109.5817         -DE/DX =    0.0                 !
 ! A3    A(3,1,4)              125.2047         -DE/DX =    0.0                 !
 ! A4    A(1,4,5)              107.9588         -DE/DX =    0.0                 !
 ! D1    D(2,1,4,5)           -180.0003         -DE/DX =    0.0                 !
 ! D2    D(3,1,4,5)             -0.0003         -DE/DX =    0.0                 !
 --------------------------------------------------------------------------------
 GradGradGradGradGradGradGradGradGradGradGradGradGradGradGradGradGradGrad

 1\1\RECHENZENTRUM RWTH AACHEN-PC-JENS\Freq\RB3LYP\TZVP\C1H2O2\JENS\17-
 Jul-2014\0\\#N Geom=AllCheck Guess=Read SCRF=Check GenChk RB3LYP/TZVP 
 Freq\\Title Card Required\\0,1\C,0.1355265525,0.3637887322,0.022679281
 4\H,0.4991589195,0.531278251,-0.9983735895\O,0.6900730604,0.7250324796
 ,1.0216034303\O,-1.02917277,-0.3097507228,-0.0180279967\H,-1.329239022
 3,-0.4449923699,0.8964087945\\Version=AM64L-G03RevE.01\State=1-A\HF=-1
 89.8390736\RMSD=6.583e-10\RMSF=1.836e-07\ZeroPoint=0.0337137\Thermal=0
 .0368813\Dipole=-0.4436319,-0.2674811,-0.2794429\DipoleDeriv=1.4601085
 ,0.679879,0.2780833,0.6806371,0.7021706,0.1954276,0.2963974,0.2059924,
 1.1472651,0.0520547,-0.0303501,0.0401806,-0.029643,0.0910292,0.0139312
 ,0.057264,0.0237861,-0.1158016,-0.7286762,-0.2103598,-0.1230136,-0.222
 8216,-0.505194,-0.0924166,-0.4240348,-0.2660605,-0.8911251,-1.1196572,
 -0.4215471,-0.1579373,-0.411761,-0.641363,-0.0875226,0.0784291,0.04882
 43,-0.313649,0.3361702,-0.017622,-0.037313,-0.0164115,0.3533573,-0.029
 4196,-0.0080558,-0.0125423,0.1733106\Polar=20.3966341,4.9489339,14.810
 7558,1.2667683,1.1516162,22.074991\PG=C01 [X(C1H2O2)]\NImag=0\\0.55164
 261,0.21244683,0.31771041,0.10912636,0.09602354,0.99010046,-0.08446920
 ,-0.00882254,0.07529259,0.09003476,-0.00848676,-0.06719982,0.03543176,
 0.03350668,0.04365234,0.08340289,0.04011018,-0.25702594,-0.08449416,-0
 .03770377,0.29247180,-0.22668831,-0.09932792,-0.24335312,0.01526547,-0
 .00356852,-0.00207291,0.25338073,-0.09885554,-0.13570863,-0.16235824,-
 0.00438633,0.01862313,-0.00361172,0.14235992,0.11916940,-0.23194113,-0
 .15577524,-0.60290194,-0.02182745,-0.01500710,-0.03705474,0.30763735,0
 .20240626,0.63124766,-0.22224122,-0.09301762,0.00844247,-0.01734826,-0
 .01573404,0.00399573,-0.04689809,-0.04554514,-0.04895612,0.36076070,-0
 .09213560,-0.11344988,0.00198039,-0.01462157,0.00185698,0.00186363,-0.
 04589468,0.00087129,-0.02894320,0.18070616,0.14321028,0.02975420,0.014
 27406,-0.13018773,0.03086791,0.01736478,-0.00044549,-0.05739831,-0.033
 81309,0.01156310,-0.09836901,-0.03545830,0.55466576,-0.01824387,-0.011
 27875,0.05049170,-0.00348277,-0.00571736,-0.00083155,0.00494020,0.0064
 2710,-0.00491266,-0.07427313,-0.02805430,0.09514520,0.09105957,-0.0129
 6893,-0.00135208,0.02892254,-0.00567623,0.00306737,-0.00065832,0.00643
 121,-0.00295519,-0.00268072,-0.02640935,-0.03248867,0.03763256,0.03862
 330,0.03372857,0.00965768,0.00536746,0.00001515,0.00016110,-0.00008567
 ,0.00205437,-0.00481302,-0.00262321,-0.00285407,0.13488693,0.06055747,
 -0.43559564,-0.13989269,-0.06321606,0.43638020\\0.00000038,0.00000017,
 -0.00000002,-0.00000003,-0.00000010,-0.00000011,0.00000004,0.00000009,
 -0.00000008,-0.00000049,-0.00000006,0.00000009,0.00000011,-0.00000010,
 0.00000012\\\@


 Not by the face shall a man be known, but by the mask.
                               -- Karen Blixen
 Job cpu time:  0 days  0 hours  1 minutes 34.5 seconds.
 File lengths (MBytes):  RWF=     17 Int=      0 D2E=      0 Chk=      6 Scr=      1
 Normal termination of Gaussian 03 at Thu Jul 17 16:54:13 2014.
