# Supplementary material for: CO from CO2and fluctuating renewable energy via formic-acid derivatives
Source: Royal Society of Chemistry journal article supplement (doi:10.1039/c6gc01202g), 2016-01-01
Supplement: c6gc01202g16.log [file c6gc01202g16.log]

 Entering Gaussian System, Link 0=/opt/mbfd/GAUSSIAN/LINUX64/g03.e01/g03
 Input=MeF_opt_freq_B3LYP_TZVP.com
 Output=MeF_opt_freq_B3LYP_TZVP.log
 Initial command:
 /opt/mbfd/GAUSSIAN/LINUX64/g03.e01/l1.exe /tmp/gaussianscratch/Gau-24780.inp -scrdir=/tmp/gaussianscratch/
 Entering Link 1 = /opt/mbfd/GAUSSIAN/LINUX64/g03.e01/l1.exe PID=     24784.
  
 Copyright (c) 1988,1990,1992,1993,1995,1998,2003,2004,2007, Gaussian, Inc.
                  All Rights Reserved.
  
 This is the Gaussian(R) 03 program.  It is based on the
 the Gaussian(R) 98 system (copyright 1998, Gaussian, Inc.),
 the Gaussian(R) 94 system (copyright 1995, Gaussian, Inc.),
 the Gaussian 92(TM) system (copyright 1992, Gaussian, Inc.),
 the Gaussian 90(TM) system (copyright 1990, Gaussian, Inc.),
 the Gaussian 88(TM) system (copyright 1988, Gaussian, Inc.),
 the Gaussian 86(TM) system (copyright 1986, Carnegie Mellon
 University), and the Gaussian 82(TM) system (copyright 1983,
 Carnegie Mellon University). Gaussian is a federally registered
 trademark of Gaussian, Inc.
  
 This software contains proprietary and confidential information,
 including trade secrets, belonging to Gaussian, Inc.
  
 This software is provided under written license and may be
 used, copied, transmitted, or stored only in accord with that
 written license.
  
 The following legend is applicable only to US Government
 contracts under FAR:
  
                    RESTRICTED RIGHTS LEGEND
  
 Use, reproduction and disclosure by the US Government is
 subject to restrictions as set forth in subparagraphs (a)
 and (c) of the Commercial Computer Software - Restricted
 Rights clause in FAR 52.227-19.
  
 Gaussian, Inc.
 340 Quinnipiac St., Bldg. 40, Wallingford CT 06492
  
  
 ---------------------------------------------------------------
 Warning -- This program may not be used in any manner that
 competes with the business of Gaussian, Inc. or will provide
 assistance to any competitor of Gaussian, Inc.  The licensee
 of this program is prohibited from giving any competitor of
 Gaussian, Inc. access to this program.  By using this program,
 the user acknowledges that Gaussian, Inc. is engaged in the
 business of creating and licensing software in the field of
 computational chemistry and represents and warrants to the
 licensee that it is not a competitor of Gaussian, Inc. and that
 it will not use this program in any manner prohibited above.
 ---------------------------------------------------------------
  

 Cite this work as:
 Gaussian 03, Revision E.01,
 M. J. Frisch, G. W. Trucks, H. B. Schlegel, G. E. Scuseria, 
 M. A. Robb, J. R. Cheeseman, J. A. Montgomery, Jr., T. Vreven, 
 K. N. Kudin, J. C. Burant, J. M. Millam, S. S. Iyengar, J. Tomasi, 
 V. Barone, B. Mennucci, M. Cossi, G. Scalmani, N. Rega, 
 G. A. Petersson, H. Nakatsuji, M. Hada, M. Ehara, K. Toyota, 
 R. Fukuda, J. Hasegawa, M. Ishida, T. Nakajima, Y. Honda, O. Kitao, 
 H. Nakai, M. Klene, X. Li, J. E. Knox, H. P. Hratchian, J. B. Cross, 
 V. Bakken, C. Adamo, J. Jaramillo, R. Gomperts, R. E. Stratmann, 
 O. Yazyev, A. J. Austin, R. Cammi, C. Pomelli, J. W. Ochterski, 
 P. Y. Ayala, K. Morokuma, G. A. Voth, P. Salvador, J. J. Dannenberg, 
 V. G. Zakrzewski, S. Dapprich, A. D. Daniels, M. C. Strain, 
 O. Farkas, D. K. Malick, A. D. Rabuck, K. Raghavachari, 
 J. B. Foresman, J. V. Ortiz, Q. Cui, A. G. Baboul, S. Clifford, 
 J. Cioslowski, B. B. Stefanov, G. Liu, A. Liashenko, P. Piskorz, 
 I. Komaromi, R. L. Martin, D. J. Fox, T. Keith, M. A. Al-Laham, 
 C. Y. Peng, A. Nanayakkara, M. Challacombe, P. M. W. Gill, 
 B. Johnson, W. Chen, M. W. Wong, C. Gonzalez, and J. A. Pople, 
 Gaussian, Inc., Wallingford CT, 2004.
 
 ******************************************
 Gaussian 03:  AM64L-G03RevE.01 11-Sep-2007
                29-Jun-2012 
 ******************************************
 %chk=MeF_opt_freq_B3LYP_TZVP.chk
 %mem=2000MB
 %nproc=1
 Will use up to    1 processors via shared memory.
 Default route: MaxDisk=200000000
 -----------------------------------------------------------------
 # opt=(tight,calcall) freq B3LYP TZVP int=ultrafine maxdisk=300GB
 -----------------------------------------------------------------
 1/7=10,10=4,14=-1,18=20,26=3,38=1/1,3;
 2/9=110,17=6,18=5,40=1/2;
 3/5=19,7=101,11=2,16=1,25=1,30=1,74=-5,75=5/1,2,3;
 4//1;
 5/5=2,38=5/2;
 8/6=4,10=90,11=11/1;
 11/6=1,8=1,9=11,15=111,16=1/1,2,10;
 10/6=1/2;
 6/7=2,8=2,9=2,10=2,18=1,28=1/1;
 7/10=1,25=1/1,2,3,16;
 1/10=4,14=-1,18=20/3(3);
 2/9=110/2;
 7/8=1,9=1,25=1,44=-1/16;
 99//99;
 2/9=110/2;
 3/5=19,7=101,11=2,16=1,25=1,30=1,74=-5,75=5/1,2,3;
 4/5=5,16=3/1;
 5/5=2,38=5/2;
 8/6=4,10=90,11=11/1;
 11/6=1,8=1,9=11,15=111,16=1/1,2,10;
 10/6=1/2;
 7/10=1,25=1/1,2,3,16;
 1/10=4,14=-1,18=20/3(-8);
 2/9=110/2;
 6/7=2,8=2,9=2,10=2,18=1,19=2,28=1/1;
 7/8=1,9=1,25=1,44=-1/16;
 99//99;
 -------------------
 Title Card Required
 -------------------
 Symbolic Z-matrix:
 Charge =  0 Multiplicity = 1
 C
 H                    1    B1
 O                    1    B2       2    A1
 O                    1    B3       3    A2       2    D1       0
 C                    4    B4       1    A3       3    D2       0
 H                    5    B5       4    A4       1    D3       0
 H                    5    B6       4    A5       1    D4       0
 H                    5    B7       4    A6       1    D5       0
       Variables:
  B1                    1.07                     
  B2                    1.2584                   
  B3                    1.43                     
  B4                    1.43                     
  B5                    1.07                     
  B6                    1.07                     
  B7                    1.07                     
  A1                  119.88653                  
  A2                  120.22695                  
  A3                  109.5                      
  A4                  109.4712                   
  A5                  109.4712                   
  A6                  109.47123                  
  D1                  180.                       
  D2                   36.18                     
  D3                  114.04999                  
  D4                 -125.94999                  
  D5                   -5.95                     
 
     3 tetrahedral angles replaced.

 GradGradGradGradGradGradGradGradGradGradGradGradGradGradGradGradGradGrad
 Berny optimization.
 Initialization pass.
                           ----------------------------
                           !    Initial Parameters    !
                           ! (Angstroms and Degrees)  !
 --------------------------                            --------------------------
 ! Name  Definition              Value          Derivative Info.                !
 --------------------------------------------------------------------------------
 ! R1    R(1,2)                  1.07           calculate D2E/DX2 analytically  !
 ! R2    R(1,3)                  1.2584         calculate D2E/DX2 analytically  !
 ! R3    R(1,4)                  1.43           calculate D2E/DX2 analytically  !
 ! R4    R(4,5)                  1.43           calculate D2E/DX2 analytically  !
 ! R5    R(5,6)                  1.07           calculate D2E/DX2 analytically  !
 ! R6    R(5,7)                  1.07           calculate D2E/DX2 analytically  !
 ! R7    R(5,8)                  1.07           calculate D2E/DX2 analytically  !
 ! A1    A(2,1,3)              119.8865         calculate D2E/DX2 analytically  !
 ! A2    A(2,1,4)              119.8865         calculate D2E/DX2 analytically  !
 ! A3    A(3,1,4)              120.2269         calculate D2E/DX2 analytically  !
 ! A4    A(1,4,5)              109.5            calculate D2E/DX2 analytically  !
 ! A5    A(4,5,6)              109.4712         calculate D2E/DX2 analytically  !
 ! A6    A(4,5,7)              109.4712         calculate D2E/DX2 analytically  !
 ! A7    A(4,5,8)              109.4712         calculate D2E/DX2 analytically  !
 ! A8    A(6,5,7)              109.4712         calculate D2E/DX2 analytically  !
 ! A9    A(6,5,8)              109.4712         calculate D2E/DX2 analytically  !
 ! A10   A(7,5,8)              109.4712         calculate D2E/DX2 analytically  !
 ! D1    D(2,1,4,5)           -143.82           calculate D2E/DX2 analytically  !
 ! D2    D(3,1,4,5)             36.18           calculate D2E/DX2 analytically  !
 ! D3    D(1,4,5,6)            114.05           calculate D2E/DX2 analytically  !
 ! D4    D(1,4,5,7)           -125.95           calculate D2E/DX2 analytically  !
 ! D5    D(1,4,5,8)             -5.95           calculate D2E/DX2 analytically  !
 --------------------------------------------------------------------------------
 Trust Radius=3.00D-01 FncErr=1.00D-07 GrdErr=1.00D-06
 Number of steps in this run=  32 maximum allowed number of steps= 100.
 GradGradGradGradGradGradGradGradGradGradGradGradGradGradGradGradGradGrad

                          Input orientation:                          
 ---------------------------------------------------------------------
 Center     Atomic     Atomic              Coordinates (Angstroms)
 Number     Number      Type              X           Y           Z
 ---------------------------------------------------------------------
    1          6             0        0.000000    0.000000    0.000000
    2          1             0        0.000000    0.000000    1.070000
    3          8             0        1.091050    0.000000   -0.627040
    4          8             0       -1.239830    0.000000   -0.712546
    5          6             0       -1.111540   -0.795743   -1.893746
    6          1             0       -1.741720   -1.656789   -1.813919
    7          1             0       -1.402871   -0.218331   -2.746167
    8          1             0       -0.094035   -1.107526   -2.004988
 ---------------------------------------------------------------------
                    Distance matrix (angstroms):
                    1          2          3          4          5
     1  C    0.000000
     2  H    1.070000   0.000000
     3  O    1.258400   2.017508   0.000000
     4  O    1.430000   2.171324   2.332448   0.000000
     5  C    2.335595   3.263820   2.662547   1.430000   0.000000
     6  H    3.011452   3.754401   3.489731   2.051796   1.070000
     7  H    3.091464   4.071713   3.279941   2.051796   1.070000
     8  H    2.292473   3.269711   2.128328   2.051796   1.070000
                    6          7          8
     6  H    0.000000
     7  H    1.747303   0.000000
     8  H    1.747303   1.747303   0.000000
 Stoichiometry    C2H4O2
 Framework group  C1[X(C2H4O2)]
 Deg. of freedom    18
 Full point group                 C1
 Largest Abelian subgroup         C1      NOp   1
 Largest concise Abelian subgroup C1      NOp   1
                         Standard orientation:                         
 ---------------------------------------------------------------------
 Center     Atomic     Atomic              Coordinates (Angstroms)
 Number     Number      Type              X           Y           Z
 ---------------------------------------------------------------------
    1          6             0        0.823797    0.478300    0.118953
    2          1             0        1.431614    1.256724    0.530675
    3          8             0        1.318169   -0.660317   -0.087728
    4          8             0       -0.547519    0.735432   -0.194539
    5          6             0       -1.328369   -0.428503    0.089060
    6          1             0       -2.001403   -0.219035    0.894075
    7          1             0       -1.887414   -0.703604   -0.780818
    8          1             0       -0.680563   -1.233786    0.366127
 ---------------------------------------------------------------------
 Rotational constants (GHZ):     18.9674260      6.7285607      5.2560052
 Standard basis: TZVP (5D, 7F)
 There are   100 symmetry adapted basis functions of A   symmetry.
 Integral buffers will be    131072 words long.
 Raffenetti 2 integral format.
 Two-electron integral symmetry is turned on.
   100 basis functions,   172 primitive gaussians,   104 cartesian basis functions
    16 alpha electrons       16 beta electrons
       nuclear repulsion energy       120.3071310788 Hartrees.
 NAtoms=    8 NActive=    8 NUniq=    8 SFac= 7.50D-01 NAtFMM=   80 NAOKFM=F Big=F
 One-electron integrals computed using PRISM.
 NBasis=   100 RedAO= T  NBF=   100
 NBsUse=   100 1.00D-06 NBFU=   100
 Harris functional with IExCor=  402 diagonalized for initial guess.
 ExpMin= 9.52D-02 ExpMax= 2.70D+04 ExpMxC= 9.22D+02 IAcc=3 IRadAn=         5 AccDes= 0.00D+00
 HarFok:  IExCor= 402 AccDes= 0.00D+00 IRadAn=         5 IDoV=1
 ScaDFX=  1.000000  1.000000  1.000000  1.000000
 Initial guess orbital symmetries:
       Occupied  (A) (A) (A) (A) (A) (A) (A) (A) (A) (A) (A) (A)
                 (A) (A) (A) (A)
       Virtual   (A) (A) (A) (A) (A) (A) (A) (A) (A) (A) (A) (A)
                 (A) (A) (A) (A) (A) (A) (A) (A) (A) (A) (A) (A)
                 (A) (A) (A) (A) (A) (A) (A) (A) (A) (A) (A) (A)
                 (A) (A) (A) (A) (A) (A) (A) (A) (A) (A) (A) (A)
                 (A) (A) (A) (A) (A) (A) (A) (A) (A) (A) (A) (A)
                 (A) (A) (A) (A) (A) (A) (A) (A) (A) (A) (A) (A)
                 (A) (A) (A) (A) (A) (A) (A) (A) (A) (A) (A) (A)
 The electronic state of the initial guess is 1-A.
 Requested convergence on RMS density matrix=1.00D-08 within 128 cycles.
 Requested convergence on MAX density matrix=1.00D-06.
 Requested convergence on             energy=1.00D-06.
 No special actions if energy rises.
 Keep R1 integrals in memory in canonical form, NReq=    16895791.
 Integral accuracy reduced to 1.0D-05 until final iterations.
 Initial convergence to 1.0D-05 achieved.  Increase integral accuracy.
 SCF Done:  E(RB+HF-LYP) =  -229.127562122     A.U. after   14 cycles
             Convg  =    0.6274D-08             -V/T =  2.0051
             S**2   =   0.0000
 Range of M.O.s used for correlation:     1   100
 NBasis=   100 NAE=    16 NBE=    16 NFC=     0 NFV=     0
 NROrb=    100 NOA=    16 NOB=    16 NVA=    84 NVB=    84

 **** Warning!!: The largest alpha MO coefficient is  0.10367880D+02

 Symmetrizing basis deriv contribution to polar:
 IMax=3 JMax=2 DiffMx= 0.00D+00
 G2DrvN: will do    9 centers at a time, making    1 passes doing MaxLOS=2.
 FoFDir/FoFCou used for L=0 through L=2.
 DoAtom=TTTTTTTT
          Differentiating once with respect to electric field.
                with respect to dipole field.
          Differentiating once with respect to nuclear coordinates.
          Store integrals in memory, NReq=    15729412.
          There are  27 degrees of freedom in the 1st order CPHF.
    24 vectors were produced by pass  0.
 AX will form  24 AO Fock derivatives at one time.
    24 vectors were produced by pass  1.
    24 vectors were produced by pass  2.
    24 vectors were produced by pass  3.
    24 vectors were produced by pass  4.
    17 vectors were produced by pass  5.
     3 vectors were produced by pass  6.
     1 vectors were produced by pass  7.
 Inv2:  IOpt= 1 Iter= 1 AM= 1.52D-15 Conv= 1.00D-12.
 Inverted reduced A of dimension  141 with in-core refinement.
 Isotropic polarizability for W=    0.000000       30.73 Bohr**3.
 End of Minotr Frequency-dependent properties file   721 does not exist.

 **********************************************************************

            Population analysis using the SCF density.

 **********************************************************************

 Orbital symmetries:
       Occupied  (A) (A) (A) (A) (A) (A) (A) (A) (A) (A) (A) (A)
                 (A) (A) (A) (A)
       Virtual   (A) (A) (A) (A) (A) (A) (A) (A) (A) (A) (A) (A)
                 (A) (A) (A) (A) (A) (A) (A) (A) (A) (A) (A) (A)
                 (A) (A) (A) (A) (A) (A) (A) (A) (A) (A) (A) (A)
                 (A) (A) (A) (A) (A) (A) (A) (A) (A) (A) (A) (A)
                 (A) (A) (A) (A) (A) (A) (A) (A) (A) (A) (A) (A)
                 (A) (A) (A) (A) (A) (A) (A) (A) (A) (A) (A) (A)
                 (A) (A) (A) (A) (A) (A) (A) (A) (A) (A) (A) (A)
 The electronic state is 1-A.
 Alpha  occ. eigenvalues --  -19.18387 -19.14481 -10.32778 -10.22196  -1.09636
 Alpha  occ. eigenvalues --   -1.01973  -0.73201  -0.62235  -0.54332  -0.48601
 Alpha  occ. eigenvalues --   -0.48307  -0.44555  -0.39323  -0.37307  -0.31140
 Alpha  occ. eigenvalues --   -0.30301
 Alpha virt. eigenvalues --   -0.05307   0.05595   0.05838   0.07771   0.10926
 Alpha virt. eigenvalues --    0.12285   0.14733   0.16931   0.18591   0.20841
 Alpha virt. eigenvalues --    0.25551   0.27738   0.30128   0.35246   0.36810
 Alpha virt. eigenvalues --    0.39976   0.43519   0.45868   0.46160   0.47049
 Alpha virt. eigenvalues --    0.48546   0.51924   0.55763   0.58282   0.62495
 Alpha virt. eigenvalues --    0.67474   0.76206   0.78704   1.14564   1.18831
 Alpha virt. eigenvalues --    1.24004   1.24909   1.25962   1.27777   1.31159
 Alpha virt. eigenvalues --    1.33139   1.37691   1.45536   1.53353   1.54600
 Alpha virt. eigenvalues --    1.59313   1.72173   1.75243   1.78003   1.78608
 Alpha virt. eigenvalues --    1.79548   1.92119   1.97121   2.03069   2.07714
 Alpha virt. eigenvalues --    2.20957   2.26538   2.35984   2.36201   2.40723
 Alpha virt. eigenvalues --    2.45421   2.56133   2.57381   2.60880   2.62351
 Alpha virt. eigenvalues --    2.63401   2.66066   2.68730   2.69310   2.72313
 Alpha virt. eigenvalues --    2.86750   2.90794   2.98201   3.02296   3.03901
 Alpha virt. eigenvalues --    3.07944   3.09665   3.13049   3.15417   3.32465
 Alpha virt. eigenvalues --    3.35320   3.45364   3.79294   3.99849   4.09094
 Alpha virt. eigenvalues --   21.79741  21.95397  43.33988  43.44892
          Condensed to atoms (all electrons):
              1          2          3          4          5          6
     1  C    4.721135   0.396818   0.519266   0.232791  -0.082455   0.010156
     2  H    0.396818   0.596708  -0.057778  -0.068515  -0.000830   0.001843
     3  O    0.519266  -0.057778   7.968857  -0.099074  -0.039375   0.002925
     4  O    0.232791  -0.068515  -0.099074   8.079240   0.225412  -0.048570
     5  C   -0.082455  -0.000830  -0.039375   0.225412   4.894901   0.384563
     6  H    0.010156   0.001843   0.002925  -0.048570   0.384563   0.592955
     7  H    0.004867  -0.000756  -0.000300  -0.035488   0.396945  -0.036837
     8  H   -0.030607   0.002554   0.030270  -0.043316   0.422498  -0.035318
              7          8
     1  C    0.004867  -0.030607
     2  H   -0.000756   0.002554
     3  O   -0.000300   0.030270
     4  O   -0.035488  -0.043316
     5  C    0.396945   0.422498
     6  H   -0.036837  -0.035318
     7  H    0.566216  -0.027942
     8  H   -0.027942   0.532491
 Mulliken atomic charges:
              1
     1  C    0.228028
     2  H    0.129955
     3  O   -0.324792
     4  O   -0.242480
     5  C   -0.201660
     6  H    0.128283
     7  H    0.133295
     8  H    0.149370
 Sum of Mulliken charges=   0.00000
 Atomic charges with hydrogens summed into heavy atoms:
              1
     1  C    0.357983
     2  H    0.000000
     3  O   -0.324792
     4  O   -0.242480
     5  C    0.209289
     6  H    0.000000
     7  H    0.000000
     8  H    0.000000
 Sum of Mulliken charges=   0.00000
 APT atomic charges:
              1
     1  C    0.949722
     2  H    0.050676
     3  O   -0.639904
     4  O   -0.775132
     5  C    0.393173
     6  H   -0.016779
     7  H   -0.007867
     8  H    0.046111
 Sum of APT charges=   0.00000
 APT Atomic charges with hydrogens summed into heavy atoms:
              1
     1  C    1.000398
     2  H    0.000000
     3  O   -0.639904
     4  O   -0.775132
     5  C    0.414638
     6  H    0.000000
     7  H    0.000000
     8  H    0.000000
 Sum of APT charges=   0.00000
 Electronic spatial extent (au):  <R**2>=   257.9374
 Charge=     0.0000 electrons
 Dipole moment (field-independent basis, Debye):
    X=    -1.1217    Y=     0.8409    Z=     1.0522  Tot=     1.7529
 Quadrupole moment (field-independent basis, Debye-Ang):
   XX=   -23.6922   YY=   -24.7359   ZZ=   -23.3111
   XY=     5.3149   XZ=     0.5111   YZ=     0.5793
 Traceless Quadrupole moment (field-independent basis, Debye-Ang):
   XX=     0.2208   YY=    -0.8228   ZZ=     0.6020
   XY=     5.3149   XZ=     0.5111   YZ=     0.5793
 Octapole moment (field-independent basis, Debye-Ang**2):
  XXX=    -4.8110  YYY=     0.6657  ZZZ=    -0.4937  XYY=     2.1301
  XXY=     4.0410  XXZ=     0.8246  XZZ=     0.2660  YZZ=     0.2751
  YYZ=     0.8752  XYZ=     0.1471
 Hexadecapole moment (field-independent basis, Debye-Ang**3):
 XXXX=  -208.6680 YYYY=   -82.4873 ZZZZ=   -31.7007 XXXY=     6.7925
 XXXZ=     1.3087 YYYX=     2.1809 YYYZ=     0.2944 ZZZX=     0.5022
 ZZZY=     0.6103 XXYY=   -47.7257 XXZZ=   -37.1803 YYZZ=   -19.0673
 XXYZ=     1.9866 YYXZ=     1.1446 ZZXY=     0.2472
 N-N= 1.203071310788D+02 E-N=-7.783226785268D+02  KE= 2.279680933397D+02
  Exact polarizability:  38.136  -0.513  30.377   0.785   1.790  23.677
 Approx polarizability:  50.671  -8.096  47.917   1.150   2.522  31.683
 ***** Axes restored to original set *****
 -------------------------------------------------------------------
 Center     Atomic                   Forces (Hartrees/Bohr)
 Number     Number              X              Y              Z
 -------------------------------------------------------------------
    1          6           0.047060169    0.008204845   -0.089828085
    2          1          -0.015798687    0.005302375    0.013368877
    3          8          -0.066530449   -0.002878668    0.048268278
    4          8           0.042846444   -0.010290237    0.047500178
    5          6          -0.002009467    0.004216565   -0.006972744
    6          1          -0.011390422   -0.009682980    0.003744568
    7          1          -0.003721909    0.008099628   -0.010181234
    8          1           0.009544322   -0.002971527   -0.005899837
 -------------------------------------------------------------------
 Cartesian Forces:  Max     0.089828085 RMS     0.030547571

 GradGradGradGradGradGradGradGradGradGradGradGradGradGradGradGradGradGrad
 Berny optimization.
 Internal  Forces:  Max     0.081734004 RMS     0.024629636
 Search for a local minimum.
 Step number   1 out of a maximum of  32
 All quantities printed in internal units (Hartrees-Bohrs-Radians)
 Second derivative matrix not updated -- analytic derivatives used.
     Eigenvalues ---   -0.00379   0.00600   0.08689   0.08790   0.10648
     Eigenvalues ---    0.13101   0.14901   0.17388   0.18867   0.20743
     Eigenvalues ---    0.25820   0.34334   0.37730   0.37864   0.38756
     Eigenvalues ---    0.39497   0.57585   0.648041000.000001000.00000
     Eigenvalues --- 1000.000001000.00000
 RFO step:  Lambda=-3.85469199D-02.
 Linear search not attempted -- first point.
 Maximum step size (   0.300) exceeded in Quadratic search.
    -- Step size scaled by   0.607
 Iteration  1 RMS(Cart)=  0.09757625 RMS(Int)=  0.00644163
 Iteration  2 RMS(Cart)=  0.00775033 RMS(Int)=  0.00005622
 Iteration  3 RMS(Cart)=  0.00004507 RMS(Int)=  0.00004313
 Iteration  4 RMS(Cart)=  0.00000000 RMS(Int)=  0.00004313
 Variable       Old X    -DE/DX   Delta X   Delta X   Delta X     New X
                                 (Linear)    (Quad)   (Total)
    R1        2.02201   0.01337   0.00000   0.02375   0.02375   2.04576
    R2        2.37803  -0.08173   0.00000  -0.07514  -0.07514   2.30289
    R3        2.70231  -0.04463   0.00000  -0.11977  -0.11977   2.58254
    R4        2.70231   0.01546   0.00000   0.01314   0.01314   2.71545
    R5        2.02201   0.01478   0.00000   0.01869   0.01869   2.04070
    R6        2.02201   0.01350   0.00000   0.01833   0.01833   2.04034
    R7        2.02201   0.01056   0.00000   0.01838   0.01838   2.04039
    A1        2.09241   0.00375   0.00000   0.04093   0.04093   2.13335
    A2        2.09241  -0.02819   0.00000  -0.10656  -0.10656   1.98585
    A3        2.09836   0.02444   0.00000   0.06563   0.06563   2.16399
    A4        1.91114   0.04557   0.00000   0.07499   0.07499   1.98612
    A5        1.91063  -0.00637   0.00000  -0.01949  -0.01955   1.89108
    A6        1.91063  -0.00272   0.00000  -0.00813  -0.00819   1.90244
    A7        1.91063   0.00832   0.00000   0.00339   0.00339   1.91402
    A8        1.91063   0.00072   0.00000   0.00441   0.00428   1.91492
    A9        1.91063   0.00222   0.00000   0.01546   0.01546   1.92609
   A10        1.91063  -0.00216   0.00000   0.00436   0.00435   1.91498
    D1       -2.51013  -0.00929   0.00000  -0.14847  -0.14847  -2.65861
    D2        0.63146  -0.00591   0.00000  -0.14976  -0.14976   0.48170
    D3        1.99055   0.00262   0.00000   0.00837   0.00827   1.99882
    D4       -2.19824  -0.00207   0.00000  -0.00315  -0.00306  -2.20130
    D5       -0.10385  -0.00129   0.00000  -0.00070  -0.00069  -0.10454
         Item               Value     Threshold  Converged?
 Maximum Force            0.081734     0.000015     NO 
 RMS     Force            0.024630     0.000010     NO 
 Maximum Displacement     0.205327     0.000060     NO 
 RMS     Displacement     0.100581     0.000040     NO 
 Predicted change in Energy=-1.803237D-02
 GradGradGradGradGradGradGradGradGradGradGradGradGradGradGradGradGradGrad

                          Input orientation:                          
 ---------------------------------------------------------------------
 Center     Atomic     Atomic              Coordinates (Angstroms)
 Number     Number      Type              X           Y           Z
 ---------------------------------------------------------------------
    1          6             0        0.026853   -0.004514   -0.012223
    2          1             0       -0.078337    0.108036    1.059329
    3          8             0        1.115871   -0.075937   -0.554457
    4          8             0       -1.164172   -0.058706   -0.680191
    5          6             0       -1.106383   -0.800953   -1.909244
    6          1             0       -1.728224   -1.677828   -1.806419
    7          1             0       -1.479212   -0.182047   -2.711559
    8          1             0       -0.085341   -1.086440   -2.113642
 ---------------------------------------------------------------------
                    Distance matrix (angstroms):
                    1          2          3          4          5
     1  C    0.000000
     2  H    1.082569   0.000000
     3  O    1.218639   2.016007   0.000000
     4  O    1.366622   2.057369   2.283573   0.000000
     5  C    2.348878   3.270407   2.701761   1.436956   0.000000
     6  H    3.016524   3.758184   3.496047   2.051366   1.079893
     7  H    3.096153   4.033137   3.376212   2.059349   1.079702
     8  H    2.366244   3.390363   2.212484   2.067582   1.079727
                    6          7          8
     6  H    0.000000
     7  H    1.765969   0.000000
     8  H    1.772905   1.765873   0.000000
 Stoichiometry    C2H4O2
 Framework group  C1[X(C2H4O2)]
 Deg. of freedom    18
 Full point group                 C1
 Largest Abelian subgroup         C1      NOp   1
 Largest concise Abelian subgroup C1      NOp   1
                         Standard orientation:                         
 ---------------------------------------------------------------------
 Center     Atomic     Atomic              Coordinates (Angstroms)
 Number     Number      Type              X           Y           Z
 ---------------------------------------------------------------------
    1          6             0        0.823557    0.445243    0.079385
    2          1             0        1.402003    1.305142    0.392323
    3          8             0        1.321540   -0.658732   -0.056017
    4          8             0       -0.496681    0.720171   -0.142072
    5          6             0       -1.365707   -0.405686    0.063066
    6          1             0       -2.007177   -0.191099    0.904872
    7          1             0       -1.964714   -0.553461   -0.822998
    8          1             0       -0.776092   -1.289435    0.255811
 ---------------------------------------------------------------------
 Rotational constants (GHZ):     20.0830871      6.7084599      5.2596318
 Standard basis: TZVP (5D, 7F)
 There are   100 symmetry adapted basis functions of A   symmetry.
 Integral buffers will be    131072 words long.
 Raffenetti 2 integral format.
 Two-electron integral symmetry is turned on.
   100 basis functions,   172 primitive gaussians,   104 cartesian basis functions
    16 alpha electrons       16 beta electrons
       nuclear repulsion energy       121.6227536199 Hartrees.
 NAtoms=    8 NActive=    8 NUniq=    8 SFac= 7.50D-01 NAtFMM=   80 NAOKFM=F Big=F
 One-electron integrals computed using PRISM.
 NBasis=   100 RedAO= T  NBF=   100
 NBsUse=   100 1.00D-06 NBFU=   100
 Initial guess read from the read-write file:
 Initial guess orbital symmetries:
       Occupied  (A) (A) (A) (A) (A) (A) (A) (A) (A) (A) (A) (A)
                 (A) (A) (A) (A)
       Virtual   (A) (A) (A) (A) (A) (A) (A) (A) (A) (A) (A) (A)
                 (A) (A) (A) (A) (A) (A) (A) (A) (A) (A) (A) (A)
                 (A) (A) (A) (A) (A) (A) (A) (A) (A) (A) (A) (A)
                 (A) (A) (A) (A) (A) (A) (A) (A) (A) (A) (A) (A)
                 (A) (A) (A) (A) (A) (A) (A) (A) (A) (A) (A) (A)
                 (A) (A) (A) (A) (A) (A) (A) (A) (A) (A) (A) (A)
                 (A) (A) (A) (A) (A) (A) (A) (A) (A) (A) (A) (A)
 Harris functional with IExCor=  402 diagonalized for initial guess.
 ExpMin= 9.52D-02 ExpMax= 2.70D+04 ExpMxC= 9.22D+02 IAcc=3 IRadAn=         5 AccDes= 0.00D+00
 HarFok:  IExCor= 402 AccDes= 0.00D+00 IRadAn=         5 IDoV=1
 ScaDFX=  1.000000  1.000000  1.000000  1.000000
 Requested convergence on RMS density matrix=1.00D-08 within 128 cycles.
 Requested convergence on MAX density matrix=1.00D-06.
 Requested convergence on             energy=1.00D-06.
 No special actions if energy rises.
 Keep R1 integrals in memory in canonical form, NReq=    16895791.
 Integral accuracy reduced to 1.0D-05 until final iterations.
 Initial convergence to 1.0D-05 achieved.  Increase integral accuracy.
 SCF Done:  E(RB+HF-LYP) =  -229.144986005     A.U. after   13 cycles
             Convg  =    0.5537D-08             -V/T =  2.0045
             S**2   =   0.0000
 Range of M.O.s used for correlation:     1   100
 NBasis=   100 NAE=    16 NBE=    16 NFC=     0 NFV=     0
 NROrb=    100 NOA=    16 NOB=    16 NVA=    84 NVB=    84
 Symmetrizing basis deriv contribution to polar:
 IMax=3 JMax=2 DiffMx= 0.00D+00
 G2DrvN: will do    9 centers at a time, making    1 passes doing MaxLOS=2.
 FoFDir/FoFCou used for L=0 through L=2.
 DoAtom=TTTTTTTT
          Differentiating once with respect to electric field.
                with respect to dipole field.
          Differentiating once with respect to nuclear coordinates.
          Store integrals in memory, NReq=    15729412.
          There are  27 degrees of freedom in the 1st order CPHF.
    24 vectors were produced by pass  0.
 AX will form  24 AO Fock derivatives at one time.
    24 vectors were produced by pass  1.
    24 vectors were produced by pass  2.
    24 vectors were produced by pass  3.
    24 vectors were produced by pass  4.
    17 vectors were produced by pass  5.
     4 vectors were produced by pass  6.
     1 vectors were produced by pass  7.
 Inv2:  IOpt= 1 Iter= 1 AM= 1.48D-15 Conv= 1.00D-12.
 Inverted reduced A of dimension  142 with in-core refinement.
 Isotropic polarizability for W=    0.000000       30.54 Bohr**3.
 End of Minotr Frequency-dependent properties file   721 does not exist.
 ***** Axes restored to original set *****
 -------------------------------------------------------------------
 Center     Atomic                   Forces (Hartrees/Bohr)
 Number     Number              X              Y              Z
 -------------------------------------------------------------------
    1          6           0.021039086    0.001816369   -0.032486730
    2          1          -0.008335705    0.005555389    0.006170414
    3          8          -0.023091834   -0.001586894    0.016266049
    4          8           0.013910644   -0.008675507    0.020995789
    5          6          -0.000084695    0.004482192   -0.005707122
    6          1          -0.005155331   -0.004432180    0.002069062
    7          1          -0.002285864    0.004072872   -0.004120896
    8          1           0.004003700   -0.001232242   -0.003186565
 -------------------------------------------------------------------
 Cartesian Forces:  Max     0.032486730 RMS     0.011760364

 GradGradGradGradGradGradGradGradGradGradGradGradGradGradGradGradGradGrad
 Berny optimization.
 Internal  Forces:  Max     0.027780619 RMS     0.009959686
 Search for a local minimum.
 Step number   2 out of a maximum of  32
 All quantities printed in internal units (Hartrees-Bohrs-Radians)
 Second derivative matrix not updated -- analytic derivatives used.
 Trust test= 9.66D-01 RLast= 3.00D-01 DXMaxT set to 4.24D-01
     Eigenvalues ---   -0.00210   0.01233   0.08602   0.08702   0.12181
     Eigenvalues ---    0.13499   0.16411   0.18619   0.19348   0.25308
     Eigenvalues ---    0.27531   0.34309   0.35766   0.35921   0.36225
     Eigenvalues ---    0.37688   0.52216   0.790351000.000001000.00000
     Eigenvalues --- 1000.000001000.00000
 RFO step:  Lambda=-2.77783134D-03.
 Quintic linear search produced a step of  0.66788.
 Maximum step size (   0.424) exceeded in Quadratic search.
    -- Step size scaled by   0.957
 Iteration  1 RMS(Cart)=  0.08884704 RMS(Int)=  0.05044236
 Iteration  2 RMS(Cart)=  0.07736990 RMS(Int)=  0.00383821
 Iteration  3 RMS(Cart)=  0.00437314 RMS(Int)=  0.00009648
 Iteration  4 RMS(Cart)=  0.00000837 RMS(Int)=  0.00009627
 Iteration  5 RMS(Cart)=  0.00000000 RMS(Int)=  0.00009627
 Variable       Old X    -DE/DX   Delta X   Delta X   Delta X     New X
                                 (Linear)    (Quad)   (Total)
    R1        2.04576   0.00750   0.01586   0.00502   0.02089   2.06665
    R2        2.30289  -0.02778  -0.05018   0.01194  -0.03824   2.26465
    R3        2.58254  -0.01374  -0.07999   0.01516  -0.06483   2.51771
    R4        2.71545   0.00773   0.00878   0.00147   0.01025   2.72570
    R5        2.04070   0.00676   0.01249   0.00139   0.01387   2.05457
    R6        2.04034   0.00619   0.01224   0.00269   0.01493   2.05527
    R7        2.04039   0.00472   0.01228   0.00002   0.01229   2.05268
    A1        2.13335   0.00221   0.02734   0.00996   0.03730   2.17065
    A2        1.98585  -0.01356  -0.07117  -0.01893  -0.09011   1.89574
    A3        2.16399   0.01135   0.04383   0.00898   0.05281   2.21679
    A4        1.98612   0.02276   0.05008   0.01610   0.06618   2.05231
    A5        1.89108  -0.00319  -0.01306  -0.00761  -0.02079   1.87029
    A6        1.90244  -0.00174  -0.00547  -0.00691  -0.01252   1.88992
    A7        1.91402   0.00431   0.00226   0.00689   0.00914   1.92316
    A8        1.91492   0.00034   0.00286   0.00028   0.00288   1.91779
    A9        1.92609   0.00109   0.01032  -0.00089   0.00944   1.93552
   A10        1.91498  -0.00085   0.00290   0.00797   0.01085   1.92583
    D1       -2.65861  -0.00895  -0.09916  -0.26904  -0.36820  -3.02681
    D2        0.48170  -0.00684  -0.10002  -0.26634  -0.36636   0.11534
    D3        1.99882   0.00140   0.00553   0.11047   0.11577   2.11459
    D4       -2.20130  -0.00105  -0.00204   0.10242   0.10059  -2.10071
    D5       -0.10454  -0.00055  -0.00046   0.11209   0.11164   0.00711
         Item               Value     Threshold  Converged?
 Maximum Force            0.027781     0.000015     NO 
 RMS     Force            0.009960     0.000010     NO 
 Maximum Displacement     0.423976     0.000060     NO 
 RMS     Displacement     0.153656     0.000040     NO 
 Predicted change in Energy=-7.640152D-03
 GradGradGradGradGradGradGradGradGradGradGradGradGradGradGradGradGradGrad

                          Input orientation:                          
 ---------------------------------------------------------------------
 Center     Atomic     Atomic              Coordinates (Angstroms)
 Number     Number      Type              X           Y           Z
 ---------------------------------------------------------------------
    1          6             0        0.053389   -0.022705   -0.007905
    2          1             0       -0.133219    0.332395    1.009490
    3          8             0        1.143241   -0.208440   -0.470387
    4          8             0       -1.117756   -0.203491   -0.616839
    5          6             0       -1.103622   -0.809603   -1.925611
    6          1             0       -1.705449   -1.713188   -1.867161
    7          1             0       -1.551347   -0.111897   -2.629622
    8          1             0       -0.084183   -1.041460   -2.220371
 ---------------------------------------------------------------------
                    Distance matrix (angstroms):
                    1          2          3          4          5
     1  C    0.000000
     2  H    1.093622   0.000000
     3  O    1.198401   2.027779   0.000000
     4  O    1.332316   1.975204   2.265741   0.000000
     5  C    2.373917   3.295551   2.743623   1.442379   0.000000
     6  H    3.067259   3.864121   3.511450   2.046429   1.087234
     7  H    3.075148   3.930854   3.454334   2.060992   1.087605
     8  H    2.439630   3.510254   2.294109   2.083695   1.086231
                    6          7          8
     6  H    0.000000
     7  H    1.780232   0.000000
     8  H    1.790106   1.784417   0.000000
 Stoichiometry    C2H4O2
 Framework group  C1[X(C2H4O2)]
 Deg. of freedom    18
 Full point group                 C1
 Largest Abelian subgroup         C1      NOp   1
 Largest concise Abelian subgroup C1      NOp   1
                         Standard orientation:                         
 ---------------------------------------------------------------------
 Center     Atomic     Atomic              Coordinates (Angstroms)
 Number     Number      Type              X           Y           Z
 ---------------------------------------------------------------------
    1          6             0       -0.830070    0.426878   -0.016752
    2          1             0       -1.388696    1.364264   -0.089239
    3          8             0       -1.333544   -0.660270    0.011286
    4          8             0        0.470885    0.709811    0.033558
    5          6             0        1.397089   -0.394854   -0.014623
    6          1             0        2.036772   -0.239603   -0.879943
    7          1             0        1.994196   -0.379394    0.894281
    8          1             0        0.856878   -1.333742   -0.095604
 ---------------------------------------------------------------------
 Rotational constants (GHZ):     20.8566627      6.6205208      5.1935217
 Standard basis: TZVP (5D, 7F)
 There are   100 symmetry adapted basis functions of A   symmetry.
 Integral buffers will be    131072 words long.
 Raffenetti 2 integral format.
 Two-electron integral symmetry is turned on.
   100 basis functions,   172 primitive gaussians,   104 cartesian basis functions
    16 alpha electrons       16 beta electrons
       nuclear repulsion energy       122.0729501693 Hartrees.
 NAtoms=    8 NActive=    8 NUniq=    8 SFac= 7.50D-01 NAtFMM=   80 NAOKFM=F Big=F
 One-electron integrals computed using PRISM.
 NBasis=   100 RedAO= T  NBF=   100
 NBsUse=   100 1.00D-06 NBFU=   100
 Initial guess read from the read-write file:
 Initial guess orbital symmetries:
       Occupied  (A) (A) (A) (A) (A) (A) (A) (A) (A) (A) (A) (A)
                 (A) (A) (A) (A)
       Virtual   (A) (A) (A) (A) (A) (A) (A) (A) (A) (A) (A) (A)
                 (A) (A) (A) (A) (A) (A) (A) (A) (A) (A) (A) (A)
                 (A) (A) (A) (A) (A) (A) (A) (A) (A) (A) (A) (A)
                 (A) (A) (A) (A) (A) (A) (A) (A) (A) (A) (A) (A)
                 (A) (A) (A) (A) (A) (A) (A) (A) (A) (A) (A) (A)
                 (A) (A) (A) (A) (A) (A) (A) (A) (A) (A) (A) (A)
                 (A) (A) (A) (A) (A) (A) (A) (A) (A) (A) (A) (A)
 Harris functional with IExCor=  402 diagonalized for initial guess.
 ExpMin= 9.52D-02 ExpMax= 2.70D+04 ExpMxC= 9.22D+02 IAcc=3 IRadAn=         5 AccDes= 0.00D+00
 HarFok:  IExCor= 402 AccDes= 0.00D+00 IRadAn=         5 IDoV=1
 ScaDFX=  1.000000  1.000000  1.000000  1.000000
 Requested convergence on RMS density matrix=1.00D-08 within 128 cycles.
 Requested convergence on MAX density matrix=1.00D-06.
 Requested convergence on             energy=1.00D-06.
 No special actions if energy rises.
 Keep R1 integrals in memory in canonical form, NReq=    16895791.
 Integral accuracy reduced to 1.0D-05 until final iterations.
 Initial convergence to 1.0D-05 achieved.  Increase integral accuracy.
 SCF Done:  E(RB+HF-LYP) =  -229.151848784     A.U. after   14 cycles
             Convg  =    0.9287D-08             -V/T =  2.0042
             S**2   =   0.0000
 Range of M.O.s used for correlation:     1   100
 NBasis=   100 NAE=    16 NBE=    16 NFC=     0 NFV=     0
 NROrb=    100 NOA=    16 NOB=    16 NVA=    84 NVB=    84

 **** Warning!!: The largest alpha MO coefficient is  0.10443694D+02

 Symmetrizing basis deriv contribution to polar:
 IMax=3 JMax=2 DiffMx= 0.00D+00
 G2DrvN: will do    9 centers at a time, making    1 passes doing MaxLOS=2.
 FoFDir/FoFCou used for L=0 through L=2.
 DoAtom=TTTTTTTT
          Differentiating once with respect to electric field.
                with respect to dipole field.
          Differentiating once with respect to nuclear coordinates.
          Store integrals in memory, NReq=    15729412.
          There are  27 degrees of freedom in the 1st order CPHF.
    24 vectors were produced by pass  0.
 AX will form  24 AO Fock derivatives at one time.
    24 vectors were produced by pass  1.
    24 vectors were produced by pass  2.
    24 vectors were produced by pass  3.
    24 vectors were produced by pass  4.
    17 vectors were produced by pass  5.
     5 vectors were produced by pass  6.
 Inv2:  IOpt= 1 Iter= 1 AM= 1.72D-15 Conv= 1.00D-12.
 Inverted reduced A of dimension  142 with in-core refinement.
 Isotropic polarizability for W=    0.000000       30.72 Bohr**3.
 End of Minotr Frequency-dependent properties file   721 does not exist.
 ***** Axes restored to original set *****
 -------------------------------------------------------------------
 Center     Atomic                   Forces (Hartrees/Bohr)
 Number     Number              X              Y              Z
 -------------------------------------------------------------------
    1          6           0.002378249    0.002918924    0.004157316
    2          1          -0.000213121    0.002116058    0.002293386
    3          8           0.004231210   -0.001947749   -0.001778901
    4          8          -0.005911666   -0.003309869   -0.001886758
    5          6           0.000090502    0.000667892   -0.001470706
    6          1          -0.000534612   -0.000793371   -0.000391499
    7          1          -0.000373169    0.000818357   -0.000090562
    8          1           0.000332606   -0.000470240   -0.000832276
 -------------------------------------------------------------------
 Cartesian Forces:  Max     0.005911666 RMS     0.002246236

 GradGradGradGradGradGradGradGradGradGradGradGradGradGradGradGradGradGrad
 Berny optimization.
 Internal  Forces:  Max     0.008177063 RMS     0.002460725
 Search for a local minimum.
 Step number   3 out of a maximum of  32
 All quantities printed in internal units (Hartrees-Bohrs-Radians)
 Second derivative matrix not updated -- analytic derivatives used.
 Trust test= 8.98D-01 RLast= 5.75D-01 DXMaxT set to 6.00D-01
     Eigenvalues ---   -0.00159   0.01992   0.08483   0.08621   0.12452
     Eigenvalues ---    0.14327   0.17184   0.18670   0.18850   0.24531
     Eigenvalues ---    0.29113   0.34278   0.34312   0.34338   0.35265
     Eigenvalues ---    0.36851   0.48530   0.903451000.000001000.00000
     Eigenvalues --- 1000.000001000.00000
 RFO step:  Lambda=-1.58885670D-03.
 Quintic linear search produced a step of  0.10062.
 Maximum step size (   0.600) exceeded in Quadratic search.
    -- Step size scaled by   0.022
 Iteration  1 RMS(Cart)=  0.11622486 RMS(Int)=  0.05072054
 Iteration  2 RMS(Cart)=  0.07038534 RMS(Int)=  0.00251112
 Iteration  3 RMS(Cart)=  0.00285419 RMS(Int)=  0.00001954
 Iteration  4 RMS(Cart)=  0.00000382 RMS(Int)=  0.00001937
 Iteration  5 RMS(Cart)=  0.00000000 RMS(Int)=  0.00001937
 Variable       Old X    -DE/DX   Delta X   Delta X   Delta X     New X
                                 (Linear)    (Quad)   (Total)
    R1        2.06665   0.00286   0.00210   0.00013   0.00223   2.06888
    R2        2.26465   0.00484  -0.00385   0.00010  -0.00375   2.26090
    R3        2.51771   0.00818  -0.00652   0.00110  -0.00543   2.51228
    R4        2.72570   0.00243   0.00103   0.00020   0.00123   2.72693
    R5        2.05457   0.00093   0.00140   0.00266   0.00406   2.05863
    R6        2.05527   0.00074   0.00150  -0.00264  -0.00114   2.05414
    R7        2.05268   0.00064   0.00124  -0.00023   0.00100   2.05368
    A1        2.17065   0.00008   0.00375  -0.00076   0.00299   2.17364
    A2        1.89574   0.00060  -0.00907  -0.00078  -0.00985   1.88590
    A3        2.21679  -0.00068   0.00531   0.00154   0.00685   2.22364
    A4        2.05231   0.00343   0.00666   0.00172   0.00838   2.06069
    A5        1.87029   0.00060  -0.00209   0.01917   0.01709   1.88738
    A6        1.88992  -0.00121  -0.00126  -0.02160  -0.02283   1.86709
    A7        1.92316   0.00133   0.00092   0.00062   0.00154   1.92470
    A8        1.91779  -0.00013   0.00029  -0.00051  -0.00017   1.91762
    A9        1.93552  -0.00043   0.00095  -0.00999  -0.00905   1.92647
   A10        1.92583  -0.00015   0.00109   0.01208   0.01318   1.93901
    D1       -3.02681  -0.00245  -0.03705  -0.01410  -0.05115  -3.07795
    D2        0.11534  -0.00211  -0.03686  -0.01174  -0.04860   0.06674
    D3        2.11459   0.00047   0.01165  -0.34518  -0.33348   1.78111
    D4       -2.10071   0.00000   0.01012  -0.34682  -0.33675  -2.43745
    D5        0.00711  -0.00014   0.01123  -0.34515  -0.33392  -0.32682
         Item               Value     Threshold  Converged?
 Maximum Force            0.008177     0.000015     NO 
 RMS     Force            0.002461     0.000010     NO 
 Maximum Displacement     0.467360     0.000060     NO 
 RMS     Displacement     0.183853     0.000040     NO 
 Predicted change in Energy=-3.321125D-04
 GradGradGradGradGradGradGradGradGradGradGradGradGradGradGradGradGradGrad

                          Input orientation:                          
 ---------------------------------------------------------------------
 Center     Atomic     Atomic              Coordinates (Angstroms)
 Number     Number      Type              X           Y           Z
 ---------------------------------------------------------------------
    1          6             0        0.053128   -0.055088    0.007022
    2          1             0       -0.141184    0.428789    0.969675
    3          8             0        1.123423   -0.455757   -0.347015
    4          8             0       -1.091290   -0.104476   -0.667728
    5          6             0       -1.098324   -0.777172   -1.944353
    6          1             0       -1.544025   -1.761602   -1.806519
    7          1             0       -1.715431   -0.182524   -2.613042
    8          1             0       -0.085242   -0.870561   -2.326446
 ---------------------------------------------------------------------
                    Distance matrix (angstroms):
                    1          2          3          4          5
     1  C    0.000000
     2  H    1.094804   0.000000
     3  O    1.196415   2.028627   0.000000
     4  O    1.329444   1.966765   2.265217   0.000000
     5  C    2.378048   3.295758   2.755169   1.443031   0.000000
     6  H    2.958381   3.804344   3.309178   2.061038   1.089380
     7  H    3.163665   3.960786   3.642612   2.044478   1.087002
     8  H    2.475725   3.543425   2.356073   2.085753   1.086762
                    6          7          8
     6  H    0.000000
     7  H    1.781389   0.000000
     8  H    1.786707   1.792498   0.000000
 Stoichiometry    C2H4O2
 Framework group  C1[X(C2H4O2)]
 Deg. of freedom    18
 Full point group                 C1
 Largest Abelian subgroup         C1      NOp   1
 Largest concise Abelian subgroup C1      NOp   1
                         Standard orientation:                         
 ---------------------------------------------------------------------
 Center     Atomic     Atomic              Coordinates (Angstroms)
 Number     Number      Type              X           Y           Z
 ---------------------------------------------------------------------
    1          6             0        0.829980    0.424595    0.010638
    2          1             0        1.381070    1.369698    0.051557
    3          8             0        1.339703   -0.657663   -0.006913
    4          8             0       -0.469007    0.706023   -0.018538
    5          6             0       -1.402776   -0.393879    0.006617
    6          1             0       -1.801938   -0.476848    1.016832
    7          1             0       -2.202212   -0.147457   -0.687465
    8          1             0       -0.905712   -1.316561   -0.280852
 ---------------------------------------------------------------------
 Rotational constants (GHZ):     21.0039138      6.5833333      5.1774849
 Standard basis: TZVP (5D, 7F)
 There are   100 symmetry adapted basis functions of A   symmetry.
 Integral buffers will be    131072 words long.
 Raffenetti 2 integral format.
 Two-electron integral symmetry is turned on.
   100 basis functions,   172 primitive gaussians,   104 cartesian basis functions
    16 alpha electrons       16 beta electrons
       nuclear repulsion energy       122.0423820293 Hartrees.
 NAtoms=    8 NActive=    8 NUniq=    8 SFac= 7.50D-01 NAtFMM=   80 NAOKFM=F Big=F
 One-electron integrals computed using PRISM.
 NBasis=   100 RedAO= T  NBF=   100
 NBsUse=   100 1.00D-06 NBFU=   100
 Initial guess read from the read-write file:
 Initial guess orbital symmetries:
       Occupied  (A) (A) (A) (A) (A) (A) (A) (A) (A) (A) (A) (A)
                 (A) (A) (A) (A)
       Virtual   (A) (A) (A) (A) (A) (A) (A) (A) (A) (A) (A) (A)
                 (A) (A) (A) (A) (A) (A) (A) (A) (A) (A) (A) (A)
                 (A) (A) (A) (A) (A) (A) (A) (A) (A) (A) (A) (A)
                 (A) (A) (A) (A) (A) (A) (A) (A) (A) (A) (A) (A)
                 (A) (A) (A) (A) (A) (A) (A) (A) (A) (A) (A) (A)
                 (A) (A) (A) (A) (A) (A) (A) (A) (A) (A) (A) (A)
                 (A) (A) (A) (A) (A) (A) (A) (A) (A) (A) (A) (A)
 Harris functional with IExCor=  402 diagonalized for initial guess.
 ExpMin= 9.52D-02 ExpMax= 2.70D+04 ExpMxC= 9.22D+02 IAcc=3 IRadAn=         5 AccDes= 0.00D+00
 HarFok:  IExCor= 402 AccDes= 0.00D+00 IRadAn=         5 IDoV=1
 ScaDFX=  1.000000  1.000000  1.000000  1.000000
 Requested convergence on RMS density matrix=1.00D-08 within 128 cycles.
 Requested convergence on MAX density matrix=1.00D-06.
 Requested convergence on             energy=1.00D-06.
 No special actions if energy rises.
 Keep R1 integrals in memory in canonical form, NReq=    16895791.
 Integral accuracy reduced to 1.0D-05 until final iterations.
 Initial convergence to 1.0D-05 achieved.  Increase integral accuracy.
 SCF Done:  E(RB+HF-LYP) =  -229.152147592     A.U. after   14 cycles
             Convg  =    0.8671D-08             -V/T =  2.0041
             S**2   =   0.0000
 Range of M.O.s used for correlation:     1   100
 NBasis=   100 NAE=    16 NBE=    16 NFC=     0 NFV=     0
 NROrb=    100 NOA=    16 NOB=    16 NVA=    84 NVB=    84

 **** Warning!!: The largest alpha MO coefficient is  0.10644618D+02

 Symmetrizing basis deriv contribution to polar:
 IMax=3 JMax=2 DiffMx= 0.00D+00
 G2DrvN: will do    9 centers at a time, making    1 passes doing MaxLOS=2.
 FoFDir/FoFCou used for L=0 through L=2.
 DoAtom=TTTTTTTT
          Differentiating once with respect to electric field.
                with respect to dipole field.
          Differentiating once with respect to nuclear coordinates.
          Store integrals in memory, NReq=    15729412.
          There are  27 degrees of freedom in the 1st order CPHF.
    24 vectors were produced by pass  0.
 AX will form  24 AO Fock derivatives at one time.
    24 vectors were produced by pass  1.
    24 vectors were produced by pass  2.
    24 vectors were produced by pass  3.
    24 vectors were produced by pass  4.
    17 vectors were produced by pass  5.
     5 vectors were produced by pass  6.
 Inv2:  IOpt= 1 Iter= 1 AM= 1.62D-15 Conv= 1.00D-12.
 Inverted reduced A of dimension  142 with in-core refinement.
 Isotropic polarizability for W=    0.000000       30.73 Bohr**3.
 End of Minotr Frequency-dependent properties file   721 does not exist.
 ***** Axes restored to original set *****
 -------------------------------------------------------------------
 Center     Atomic                   Forces (Hartrees/Bohr)
 Number     Number              X              Y              Z
 -------------------------------------------------------------------
    1          6           0.000308912    0.003939874    0.007580859
    2          1           0.000802103    0.001706130    0.002209743
    3          8           0.006304867   -0.003939128   -0.003443808
    4          8          -0.008397700   -0.001250371   -0.004804857
    5          6           0.000575540    0.000099885   -0.000105321
    6          1           0.000387620   -0.000565785   -0.000621932
    7          1          -0.000120484    0.000350166    0.000148953
    8          1           0.000139142   -0.000340771   -0.000963637
 -------------------------------------------------------------------
 Cartesian Forces:  Max     0.008397700 RMS     0.003203233

 GradGradGradGradGradGradGradGradGradGradGradGradGradGradGradGradGradGrad
 Berny optimization.
 Internal  Forces:  Max     0.009668007 RMS     0.002982337
 Search for a local minimum.
 Step number   4 out of a maximum of  32
 All quantities printed in internal units (Hartrees-Bohrs-Radians)
 Second derivative matrix not updated -- analytic derivatives used.
 Trust test= 9.00D-01 RLast= 5.85D-01 DXMaxT set to 8.49D-01
     Eigenvalues ---   -0.00111   0.02052   0.08470   0.08534   0.12515
     Eigenvalues ---    0.14437   0.17139   0.18655   0.18773   0.24087
     Eigenvalues ---    0.28228   0.33823   0.34080   0.34472   0.34981
     Eigenvalues ---    0.36668   0.47391   0.914791000.000001000.00000
     Eigenvalues --- 1000.000001000.00000
 RFO step:  Lambda=-1.53018941D-03.
 Quintic linear search produced a step of  1.10954.
 Maximum step size (   0.849) exceeded in Quadratic search.
    -- Step size scaled by   0.695
 Iteration  1 RMS(Cart)=  0.13447412 RMS(Int)=  0.24467393
 Iteration  2 RMS(Cart)=  0.10302071 RMS(Int)=  0.17060200
 Iteration  3 RMS(Cart)=  0.10146923 RMS(Int)=  0.09680159
 Iteration  4 RMS(Cart)=  0.10174530 RMS(Int)=  0.02341783
 Iteration  5 RMS(Cart)=  0.03201743 RMS(Int)=  0.00057750
 Iteration  6 RMS(Cart)=  0.00060887 RMS(Int)=  0.00023631
 Iteration  7 RMS(Cart)=  0.00000026 RMS(Int)=  0.00023631
 Variable       Old X    -DE/DX   Delta X   Delta X   Delta X     New X
                                 (Linear)    (Quad)   (Total)
    R1        2.06888   0.00255   0.00248   0.00202   0.00449   2.07337
    R2        2.26090   0.00798  -0.00416   0.00845   0.00428   2.26518
    R3        2.51228   0.00967  -0.00602   0.01672   0.01070   2.52298
    R4        2.72693   0.00157   0.00137  -0.00147  -0.00010   2.72683
    R5        2.05863   0.00027   0.00450   0.00182   0.00633   2.06496
    R6        2.05414   0.00017  -0.00126  -0.00410  -0.00536   2.04877
    R7        2.05368   0.00050   0.00111   0.00139   0.00250   2.05618
    A1        2.17364   0.00046   0.00332   0.00322   0.00654   2.18018
    A2        1.88590   0.00282  -0.01092   0.01946   0.00853   1.89443
    A3        2.22364  -0.00328   0.00760  -0.02267  -0.01507   2.20857
    A4        2.06069  -0.00072   0.00930  -0.03214  -0.02284   2.03785
    A5        1.88738   0.00112   0.01896   0.03526   0.05438   1.94176
    A6        1.86709  -0.00097  -0.02534  -0.02749  -0.05251   1.81458
    A7        1.92470   0.00122   0.00171   0.00747   0.00909   1.93378
    A8        1.91762  -0.00005  -0.00019   0.00607   0.00649   1.92411
    A9        1.92647  -0.00085  -0.01005  -0.02416  -0.03438   1.89209
   A10        1.93901  -0.00042   0.01462   0.00393   0.01857   1.95758
    D1       -3.07795  -0.00154  -0.05675  -0.03820  -0.09494   3.11029
    D2        0.06674  -0.00154  -0.05392  -0.04039  -0.09432  -0.02758
    D3        1.78111  -0.00022  -0.37001  -0.49174  -0.86109   0.92003
    D4       -2.43745  -0.00021  -0.37363  -0.48091  -0.85503   2.99070
    D5       -0.32682  -0.00061  -0.37050  -0.48870  -0.85937  -1.18619
         Item               Value     Threshold  Converged?
 Maximum Force            0.009668     0.000015     NO 
 RMS     Force            0.002982     0.000010     NO 
 Maximum Displacement     1.011802     0.000060     NO 
 RMS     Displacement     0.456080     0.000040     NO 
 Predicted change in Energy=-2.646385D-03
 GradGradGradGradGradGradGradGradGradGradGradGradGradGradGradGradGradGrad

                          Input orientation:                          
 ---------------------------------------------------------------------
 Center     Atomic     Atomic              Coordinates (Angstroms)
 Number     Number      Type              X           Y           Z
 ---------------------------------------------------------------------
    1          6             0        0.008307   -0.119735    0.048485
    2          1             0       -0.044018    0.610417    0.865765
    3          8             0        0.826413   -0.991180   -0.041638
    4          8             0       -0.980080    0.134824   -0.812210
    5          6             0       -1.052208   -0.702833   -1.984946
    6          1             0       -1.056256   -1.761856   -1.715671
    7          1             0       -1.995195   -0.429016   -2.444522
    8          1             0       -0.205908   -0.519013   -2.643670
 ---------------------------------------------------------------------
                    Distance matrix (angstroms):
                    1          2          3          4          5
     1  C    0.000000
     2  H    1.097182   0.000000
     3  O    1.198680   2.036208   0.000000
     4  O    1.335105   1.979394   2.263864   0.000000
     5  C    2.366335   3.296609   2.718236   1.442977   0.000000
     6  H    2.634787   3.649125   2.634534   2.102246   1.092728
     7  H    3.213216   3.980642   3.748513   2.003202   1.084163
     8  H    2.730020   3.690251   2.838873   2.093106   1.088085
                    6          7          8
     6  H    0.000000
     7  H    1.785859   0.000000
     8  H    1.768878   1.802583   0.000000
 Stoichiometry    C2H4O2
 Framework group  C1[X(C2H4O2)]
 Deg. of freedom    18
 Full point group                 C1
 Largest Abelian subgroup         C1      NOp   1
 Largest concise Abelian subgroup C1      NOp   1
                         Standard orientation:                         
 ---------------------------------------------------------------------
 Center     Atomic     Atomic              Coordinates (Angstroms)
 Number     Number      Type              X           Y           Z
 ---------------------------------------------------------------------
    1          6             0       -0.831503    0.428756    0.003814
    2          1             0       -1.397861    1.368222    0.025021
    3          8             0       -1.319080   -0.666249   -0.004358
    4          8             0        0.471686    0.718753   -0.006331
    5          6             0        1.385833   -0.397654    0.006076
    6          1             0        1.155802   -1.106888   -0.792753
    7          1             0        2.355691    0.056374   -0.163167
    8          1             0        1.339538   -0.924353    0.957062
 ---------------------------------------------------------------------
 Rotational constants (GHZ):     20.4899772      6.7198552      5.2262247
 Standard basis: TZVP (5D, 7F)
 There are   100 symmetry adapted basis functions of A   symmetry.
 Integral buffers will be    131072 words long.
 Raffenetti 2 integral format.
 Two-electron integral symmetry is turned on.
   100 basis functions,   172 primitive gaussians,   104 cartesian basis functions
    16 alpha electrons       16 beta electrons
       nuclear repulsion energy       122.0441123523 Hartrees.
 NAtoms=    8 NActive=    8 NUniq=    8 SFac= 7.50D-01 NAtFMM=   80 NAOKFM=F Big=F
 One-electron integrals computed using PRISM.
 NBasis=   100 RedAO= T  NBF=   100
 NBsUse=   100 1.00D-06 NBFU=   100
 Initial guess read from the read-write file:
 Initial guess orbital symmetries:
       Occupied  (A) (A) (A) (A) (A) (A) (A) (A) (A) (A) (A) (A)
                 (A) (A) (A) (A)
       Virtual   (A) (A) (A) (A) (A) (A) (A) (A) (A) (A) (A) (A)
                 (A) (A) (A) (A) (A) (A) (A) (A) (A) (A) (A) (A)
                 (A) (A) (A) (A) (A) (A) (A) (A) (A) (A) (A) (A)
                 (A) (A) (A) (A) (A) (A) (A) (A) (A) (A) (A) (A)
                 (A) (A) (A) (A) (A) (A) (A) (A) (A) (A) (A) (A)
                 (A) (A) (A) (A) (A) (A) (A) (A) (A) (A) (A) (A)
                 (A) (A) (A) (A) (A) (A) (A) (A) (A) (A) (A) (A)
 Harris functional with IExCor=  402 diagonalized for initial guess.
 ExpMin= 9.52D-02 ExpMax= 2.70D+04 ExpMxC= 9.22D+02 IAcc=3 IRadAn=         5 AccDes= 0.00D+00
 HarFok:  IExCor= 402 AccDes= 0.00D+00 IRadAn=         5 IDoV=1
 ScaDFX=  1.000000  1.000000  1.000000  1.000000
 Requested convergence on RMS density matrix=1.00D-08 within 128 cycles.
 Requested convergence on MAX density matrix=1.00D-06.
 Requested convergence on             energy=1.00D-06.
 No special actions if energy rises.
 Keep R1 integrals in memory in canonical form, NReq=    16895489.
 Integral accuracy reduced to 1.0D-05 until final iterations.
 Initial convergence to 1.0D-05 achieved.  Increase integral accuracy.
 SCF Done:  E(RB+HF-LYP) =  -229.153123949     A.U. after   14 cycles
             Convg  =    0.8015D-08             -V/T =  2.0043
             S**2   =   0.0000
 Range of M.O.s used for correlation:     1   100
 NBasis=   100 NAE=    16 NBE=    16 NFC=     0 NFV=     0
 NROrb=    100 NOA=    16 NOB=    16 NVA=    84 NVB=    84

 **** Warning!!: The largest alpha MO coefficient is  0.11056234D+02

 Symmetrizing basis deriv contribution to polar:
 IMax=3 JMax=2 DiffMx= 0.00D+00
 G2DrvN: will do    9 centers at a time, making    1 passes doing MaxLOS=2.
 FoFDir/FoFCou used for L=0 through L=2.
 DoAtom=TTTTTTTT
          Differentiating once with respect to electric field.
                with respect to dipole field.
          Differentiating once with respect to nuclear coordinates.
          Store integrals in memory, NReq=    15729412.
          There are  27 degrees of freedom in the 1st order CPHF.
    24 vectors were produced by pass  0.
 AX will form  24 AO Fock derivatives at one time.
    24 vectors were produced by pass  1.
    24 vectors were produced by pass  2.
    24 vectors were produced by pass  3.
    24 vectors were produced by pass  4.
    16 vectors were produced by pass  5.
     5 vectors were produced by pass  6.
 Inv2:  IOpt= 1 Iter= 1 AM= 1.56D-15 Conv= 1.00D-12.
 Inverted reduced A of dimension  141 with in-core refinement.
 Isotropic polarizability for W=    0.000000       30.66 Bohr**3.
 End of Minotr Frequency-dependent properties file   721 does not exist.
 ***** Axes restored to original set *****
 -------------------------------------------------------------------
 Center     Atomic                   Forces (Hartrees/Bohr)
 Number     Number              X              Y              Z
 -------------------------------------------------------------------
    1          6           0.000319181    0.003294118    0.003486751
    2          1           0.000265398   -0.000244562    0.001238128
    3          8           0.001878636   -0.002672565   -0.001650302
    4          8          -0.000054047   -0.000567147   -0.002400730
    5          6          -0.002776841   -0.003943969    0.003075083
    6          1          -0.000184410    0.002240034    0.001308591
    7          1           0.000536137   -0.000286948   -0.004079051
    8          1           0.000015946    0.002181039   -0.000978470
 -------------------------------------------------------------------
 Cartesian Forces:  Max     0.004079051 RMS     0.002106204

 GradGradGradGradGradGradGradGradGradGradGradGradGradGradGradGradGradGrad
 Berny optimization.
 Internal  Forces:  Max     0.005375475 RMS     0.002186671
 Search for a local minimum.
 Step number   5 out of a maximum of  32
 All quantities printed in internal units (Hartrees-Bohrs-Radians)
 Second derivative matrix not updated -- analytic derivatives used.
 Trust test= 3.69D-01 RLast= 1.50D+00 DXMaxT set to 8.49D-01
     Eigenvalues ---    0.00192   0.02369   0.08313   0.08467   0.12633
     Eigenvalues ---    0.14214   0.17017   0.18445   0.18786   0.23324
     Eigenvalues ---    0.26415   0.33355   0.33440   0.34097   0.34990
     Eigenvalues ---    0.36553   0.44432   0.901231000.000001000.00000
     Eigenvalues --- 1000.000001000.00000
 RFO step:  Lambda=-4.06534253D-04.
 Quintic linear search produced a step of -0.20658.
 Iteration  1 RMS(Cart)=  0.06822403 RMS(Int)=  0.00243348
 Iteration  2 RMS(Cart)=  0.00261387 RMS(Int)=  0.00003396
 Iteration  3 RMS(Cart)=  0.00000221 RMS(Int)=  0.00003392
 Iteration  4 RMS(Cart)=  0.00000000 RMS(Int)=  0.00003392
 Variable       Old X    -DE/DX   Delta X   Delta X   Delta X     New X
                                 (Linear)    (Quad)   (Total)
    R1        2.07337   0.00075  -0.00093   0.00160   0.00067   2.07405
    R2        2.26518   0.00335  -0.00088   0.00445   0.00356   2.26874
    R3        2.52298   0.00373  -0.00221   0.01184   0.00963   2.53262
    R4        2.72683   0.00056   0.00002   0.00089   0.00091   2.72774
    R5        2.06496  -0.00185  -0.00131  -0.00582  -0.00712   2.05783
    R6        2.04877   0.00119   0.00111   0.00303   0.00414   2.05291
    R7        2.05618   0.00097  -0.00052   0.00342   0.00291   2.05909
    A1        2.18018   0.00050  -0.00135   0.00078  -0.00058   2.17960
    A2        1.89443   0.00226  -0.00176   0.00925   0.00749   1.90192
    A3        2.20857  -0.00276   0.00311  -0.01002  -0.00690   2.20167
    A4        2.03785  -0.00174   0.00472  -0.00798  -0.00327   2.03458
    A5        1.94176  -0.00259  -0.01123  -0.00694  -0.01819   1.92357
    A6        1.81458   0.00538   0.01085   0.02100   0.03187   1.84645
    A7        1.93378  -0.00209  -0.00188  -0.00946  -0.01130   1.92248
    A8        1.92411   0.00035  -0.00134   0.00917   0.00780   1.93191
    A9        1.89209   0.00187   0.00710   0.01119   0.01829   1.91038
   A10        1.95758  -0.00299  -0.00384  -0.02540  -0.02915   1.92843
    D1        3.11029   0.00122   0.01961   0.01897   0.03859  -3.13431
    D2       -0.02758   0.00058   0.01948   0.01554   0.03502   0.00744
    D3        0.92003  -0.00063   0.17788  -0.07527   0.10258   1.02261
    D4        2.99070   0.00161   0.17663  -0.05571   0.12101   3.11171
    D5       -1.18619   0.00015   0.17753  -0.07836   0.09909  -1.08709
         Item               Value     Threshold  Converged?
 Maximum Force            0.005375     0.000015     NO 
 RMS     Force            0.002187     0.000010     NO 
 Maximum Displacement     0.132418     0.000060     NO 
 RMS     Displacement     0.068288     0.000040     NO 
 Predicted change in Energy=-3.068043D-04
 GradGradGradGradGradGradGradGradGradGradGradGradGradGradGradGradGradGrad

                          Input orientation:                          
 ---------------------------------------------------------------------
 Center     Atomic     Atomic              Coordinates (Angstroms)
 Number     Number      Type              X           Y           Z
 ---------------------------------------------------------------------
    1          6             0        0.018018   -0.110601    0.042929
    2          1             0       -0.058843    0.578513    0.893696
    3          8             0        0.882907   -0.930855   -0.100273
    4          8             0       -1.002494    0.116773   -0.795522
    5          6             0       -1.065857   -0.712388   -1.975373
    6          1             0       -1.126328   -1.762706   -1.694295
    7          1             0       -1.962889   -0.404596   -2.505244
    8          1             0       -0.183460   -0.552529   -2.594324
 ---------------------------------------------------------------------
                    Distance matrix (angstroms):
                    1          2          3          4          5
     1  C    0.000000
     2  H    1.097538   0.000000
     3  O    1.200565   2.037906   0.000000
     4  O    1.340203   1.989256   2.266194   0.000000
     5  C    2.368644   3.303340   2.713192   1.443458   0.000000
     6  H    2.656487   3.649455   2.696277   2.087000   1.088958
     7  H    3.240928   4.018045   3.762897   2.029121   1.086354
     8  H    2.681603   3.668933   2.738715   2.086737   1.089624
                    6          7          8
     6  H    0.000000
     7  H    1.789395   0.000000
     8  H    1.778647   1.787789   0.000000
 Stoichiometry    C2H4O2
 Framework group  C1[X(C2H4O2)]
 Deg. of freedom    18
 Full point group                 C1
 Largest Abelian subgroup         C1      NOp   1
 Largest concise Abelian subgroup C1      NOp   1
                         Standard orientation:                         
 ---------------------------------------------------------------------
 Center     Atomic     Atomic              Coordinates (Angstroms)
 Number     Number      Type              X           Y           Z
 ---------------------------------------------------------------------
    1          6             0       -0.834740    0.430435   -0.001056
    2          1             0       -1.408864    1.365824   -0.005523
    3          8             0       -1.314949   -0.669907    0.000808
    4          8             0        0.473339    0.722091    0.002111
    5          6             0        1.384524   -0.397418   -0.001263
    6          1             0        1.210281   -1.021709   -0.876324
    7          1             0        2.381599    0.032963   -0.029201
    8          1             0        1.251165   -0.992653    0.901616
 ---------------------------------------------------------------------
 Rotational constants (GHZ):     20.3963069      6.7249585      5.2241346
 Standard basis: TZVP (5D, 7F)
 There are   100 symmetry adapted basis functions of A   symmetry.
 Integral buffers will be    131072 words long.
 Raffenetti 2 integral format.
 Two-electron integral symmetry is turned on.
   100 basis functions,   172 primitive gaussians,   104 cartesian basis functions
    16 alpha electrons       16 beta electrons
       nuclear repulsion energy       121.9213505074 Hartrees.
 NAtoms=    8 NActive=    8 NUniq=    8 SFac= 7.50D-01 NAtFMM=   80 NAOKFM=F Big=F
 One-electron integrals computed using PRISM.
 NBasis=   100 RedAO= T  NBF=   100
 NBsUse=   100 1.00D-06 NBFU=   100
 Initial guess read from the read-write file:
 Initial guess orbital symmetries:
       Occupied  (A) (A) (A) (A) (A) (A) (A) (A) (A) (A) (A) (A)
                 (A) (A) (A) (A)
       Virtual   (A) (A) (A) (A) (A) (A) (A) (A) (A) (A) (A) (A)
                 (A) (A) (A) (A) (A) (A) (A) (A) (A) (A) (A) (A)
                 (A) (A) (A) (A) (A) (A) (A) (A) (A) (A) (A) (A)
                 (A) (A) (A) (A) (A) (A) (A) (A) (A) (A) (A) (A)
                 (A) (A) (A) (A) (A) (A) (A) (A) (A) (A) (A) (A)
                 (A) (A) (A) (A) (A) (A) (A) (A) (A) (A) (A) (A)
                 (A) (A) (A) (A) (A) (A) (A) (A) (A) (A) (A) (A)
 Harris functional with IExCor=  402 diagonalized for initial guess.
 ExpMin= 9.52D-02 ExpMax= 2.70D+04 ExpMxC= 9.22D+02 IAcc=3 IRadAn=         5 AccDes= 0.00D+00
 HarFok:  IExCor= 402 AccDes= 0.00D+00 IRadAn=         5 IDoV=1
 ScaDFX=  1.000000  1.000000  1.000000  1.000000
 Requested convergence on RMS density matrix=1.00D-08 within 128 cycles.
 Requested convergence on MAX density matrix=1.00D-06.
 Requested convergence on             energy=1.00D-06.
 No special actions if energy rises.
 Keep R1 integrals in memory in canonical form, NReq=    16895489.
 Integral accuracy reduced to 1.0D-05 until final iterations.
 Initial convergence to 1.0D-05 achieved.  Increase integral accuracy.
 SCF Done:  E(RB+HF-LYP) =  -229.153436309     A.U. after   11 cycles
             Convg  =    0.4756D-08             -V/T =  2.0044
             S**2   =   0.0000
 Range of M.O.s used for correlation:     1   100
 NBasis=   100 NAE=    16 NBE=    16 NFC=     0 NFV=     0
 NROrb=    100 NOA=    16 NOB=    16 NVA=    84 NVB=    84

 **** Warning!!: The largest alpha MO coefficient is  0.10260543D+02

 Symmetrizing basis deriv contribution to polar:
 IMax=3 JMax=2 DiffMx= 0.00D+00
 G2DrvN: will do    9 centers at a time, making    1 passes doing MaxLOS=2.
 FoFDir/FoFCou used for L=0 through L=2.
 DoAtom=TTTTTTTT
          Differentiating once with respect to electric field.
                with respect to dipole field.
          Differentiating once with respect to nuclear coordinates.
          Store integrals in memory, NReq=    15729412.
          There are  27 degrees of freedom in the 1st order CPHF.
    24 vectors were produced by pass  0.
 AX will form  24 AO Fock derivatives at one time.
    24 vectors were produced by pass  1.
    24 vectors were produced by pass  2.
    24 vectors were produced by pass  3.
    24 vectors were produced by pass  4.
    16 vectors were produced by pass  5.
     5 vectors were produced by pass  6.
 Inv2:  IOpt= 1 Iter= 1 AM= 1.77D-15 Conv= 1.00D-12.
 Inverted reduced A of dimension  141 with in-core refinement.
 Isotropic polarizability for W=    0.000000       30.67 Bohr**3.
 End of Minotr Frequency-dependent properties file   721 does not exist.
 ***** Axes restored to original set *****
 -------------------------------------------------------------------
 Center     Atomic                   Forces (Hartrees/Bohr)
 Number     Number              X              Y              Z
 -------------------------------------------------------------------
    1          6          -0.000119790    0.000145385   -0.000327444
    2          1          -0.000007959    0.000093379    0.000004002
    3          8          -0.000388733   -0.000229676   -0.000561892
    4          8          -0.000888221    0.000370102    0.000174146
    5          6           0.001157862    0.000315141    0.000618121
    6          1           0.000101993   -0.000472756   -0.000344657
    7          1           0.000068781    0.000263595    0.000600498
    8          1           0.000076067   -0.000485169   -0.000162774
 -------------------------------------------------------------------
 Cartesian Forces:  Max     0.001157862 RMS     0.000433231

 GradGradGradGradGradGradGradGradGradGradGradGradGradGradGradGradGradGrad
 Berny optimization.
 Internal  Forces:  Max     0.002426464 RMS     0.000717440
 Search for a local minimum.
 Step number   6 out of a maximum of  32
 All quantities printed in internal units (Hartrees-Bohrs-Radians)
 Second derivative matrix not updated -- analytic derivatives used.
 Trust test= 1.02D+00 RLast= 2.02D-01 DXMaxT set to 8.49D-01
     Eigenvalues ---    0.00199   0.02369   0.08308   0.08477   0.12551
     Eigenvalues ---    0.14055   0.16960   0.18540   0.18620   0.23187
     Eigenvalues ---    0.26380   0.33275   0.33797   0.33978   0.34724
     Eigenvalues ---    0.36272   0.43304   0.889511000.000001000.00000
     Eigenvalues --- 1000.000001000.00000
 RFO step:  Lambda=-4.48244739D-05.
 Quintic linear search produced a step of -0.07979.
 Iteration  1 RMS(Cart)=  0.01645011 RMS(Int)=  0.00015293
 Iteration  2 RMS(Cart)=  0.00019226 RMS(Int)=  0.00000158
 Iteration  3 RMS(Cart)=  0.00000003 RMS(Int)=  0.00000158
 Variable       Old X    -DE/DX   Delta X   Delta X   Delta X     New X
                                 (Linear)    (Quad)   (Total)
    R1        2.07405   0.00006  -0.00005   0.00011   0.00006   2.07410
    R2        2.26874  -0.00006  -0.00028   0.00048   0.00020   2.26894
    R3        2.53262  -0.00095  -0.00077  -0.00008  -0.00084   2.53177
    R4        2.72774  -0.00043  -0.00007  -0.00039  -0.00046   2.72728
    R5        2.05783   0.00036   0.00057   0.00065   0.00122   2.05905
    R6        2.05291  -0.00028  -0.00033  -0.00033  -0.00066   2.05225
    R7        2.05909   0.00008  -0.00023   0.00019  -0.00004   2.05905
    A1        2.17960   0.00057   0.00005   0.00146   0.00151   2.18111
    A2        1.90192   0.00048  -0.00060   0.00306   0.00247   1.90438
    A3        2.20167  -0.00105   0.00055  -0.00453  -0.00397   2.19769
    A4        2.03458  -0.00243   0.00026  -0.00902  -0.00876   2.02582
    A5        1.92357   0.00068   0.00145   0.00164   0.00309   1.92666
    A6        1.84645  -0.00108  -0.00254  -0.00270  -0.00525   1.84120
    A7        1.92248   0.00066   0.00090   0.00339   0.00429   1.92677
    A8        1.93191   0.00005  -0.00062  -0.00007  -0.00069   1.93121
    A9        1.91038  -0.00053  -0.00146  -0.00267  -0.00413   1.90626
   A10        1.92843   0.00023   0.00233   0.00051   0.00283   1.93127
    D1       -3.13431  -0.00011  -0.00308  -0.00405  -0.00713  -3.14143
    D2        0.00744  -0.00017  -0.00279  -0.00449  -0.00728   0.00016
    D3        1.02261   0.00020  -0.00818   0.04203   0.03385   1.05646
    D4        3.11171  -0.00002  -0.00966   0.04125   0.03160  -3.13987
    D5       -1.08709  -0.00001  -0.00791   0.04210   0.03419  -1.05290
         Item               Value     Threshold  Converged?
 Maximum Force            0.002426     0.000015     NO 
 RMS     Force            0.000717     0.000010     NO 
 Maximum Displacement     0.036855     0.000060     NO 
 RMS     Displacement     0.016460     0.000040     NO 
 Predicted change in Energy=-2.559015D-05
 GradGradGradGradGradGradGradGradGradGradGradGradGradGradGradGradGradGrad

                          Input orientation:                          
 ---------------------------------------------------------------------
 Center     Atomic     Atomic              Coordinates (Angstroms)
 Number     Number      Type              X           Y           Z
 ---------------------------------------------------------------------
    1          6             0        0.016194   -0.107855    0.039281
    2          1             0       -0.057629    0.576152    0.894466
    3          8             0        0.886826   -0.919221   -0.119776
    4          8             0       -1.014907    0.110905   -0.787714
    5          6             0       -1.065141   -0.714057   -1.970837
    6          1             0       -1.138199   -1.766201   -1.697174
    7          1             0       -1.953113   -0.395734   -2.508962
    8          1             0       -0.172977   -0.562378   -2.577691
 ---------------------------------------------------------------------
                    Distance matrix (angstroms):
                    1          2          3          4          5
     1  C    0.000000
     2  H    1.097568   0.000000
     3  O    1.200672   2.038828   0.000000
     4  O    1.339756   1.990620   2.263600   0.000000
     5  C    2.361639   3.299951   2.697905   1.443213   0.000000
     6  H    2.664209   3.656617   2.703014   2.089460   1.089603
     7  H    3.233356   4.015065   3.748000   2.024749   1.086003
     8  H    2.662878   3.655876   2.700345   2.089538   1.089603
                    6          7          8
     6  H    0.000000
     7  H    1.789208   0.000000
     8  H    1.776556   1.789239   0.000000
 Stoichiometry    C2H4O2
 Framework group  C1[X(C2H4O2)]
 Deg. of freedom    18
 Full point group                 C1
 Largest Abelian subgroup         C1      NOp   1
 Largest concise Abelian subgroup C1      NOp   1
                         Standard orientation:                         
 ---------------------------------------------------------------------
 Center     Atomic     Atomic              Coordinates (Angstroms)
 Number     Number      Type              X           Y           Z
 ---------------------------------------------------------------------
    1          6             0        0.833677    0.431308    0.000028
    2          1             0        1.412493    1.363846    0.000141
    3          8             0        1.306751   -0.672238   -0.000021
    4          8             0       -0.473228    0.726176   -0.000043
    5          6             0       -1.377262   -0.398807    0.000014
    6          1             0       -1.223425   -1.009390    0.889260
    7          1             0       -2.374755    0.030620   -0.001854
    8          1             0       -1.220986   -1.011586   -0.887293
 ---------------------------------------------------------------------
 Rotational constants (GHZ):     20.2621692      6.7852039      5.2510369
 Standard basis: TZVP (5D, 7F)
 There are   100 symmetry adapted basis functions of A   symmetry.
 Integral buffers will be    131072 words long.
 Raffenetti 2 integral format.
 Two-electron integral symmetry is turned on.
   100 basis functions,   172 primitive gaussians,   104 cartesian basis functions
    16 alpha electrons       16 beta electrons
       nuclear repulsion energy       122.0501406370 Hartrees.
 NAtoms=    8 NActive=    8 NUniq=    8 SFac= 7.50D-01 NAtFMM=   80 NAOKFM=F Big=F
 One-electron integrals computed using PRISM.
 NBasis=   100 RedAO= T  NBF=   100
 NBsUse=   100 1.00D-06 NBFU=   100
 Initial guess read from the read-write file:
 Initial guess orbital symmetries:
       Occupied  (A) (A) (A) (A) (A) (A) (A) (A) (A) (A) (A) (A)
                 (A) (A) (A) (A)
       Virtual   (A) (A) (A) (A) (A) (A) (A) (A) (A) (A) (A) (A)
                 (A) (A) (A) (A) (A) (A) (A) (A) (A) (A) (A) (A)
                 (A) (A) (A) (A) (A) (A) (A) (A) (A) (A) (A) (A)
                 (A) (A) (A) (A) (A) (A) (A) (A) (A) (A) (A) (A)
                 (A) (A) (A) (A) (A) (A) (A) (A) (A) (A) (A) (A)
                 (A) (A) (A) (A) (A) (A) (A) (A) (A) (A) (A) (A)
                 (A) (A) (A) (A) (A) (A) (A) (A) (A) (A) (A) (A)
 Harris functional with IExCor=  402 diagonalized for initial guess.
 ExpMin= 9.52D-02 ExpMax= 2.70D+04 ExpMxC= 9.22D+02 IAcc=3 IRadAn=         5 AccDes= 0.00D+00
 HarFok:  IExCor= 402 AccDes= 0.00D+00 IRadAn=         5 IDoV=1
 ScaDFX=  1.000000  1.000000  1.000000  1.000000
 Requested convergence on RMS density matrix=1.00D-08 within 128 cycles.
 Requested convergence on MAX density matrix=1.00D-06.
 Requested convergence on             energy=1.00D-06.
 No special actions if energy rises.
 Keep R1 integrals in memory in canonical form, NReq=    16895489.
 Integral accuracy reduced to 1.0D-05 until final iterations.
 Initial convergence to 1.0D-05 achieved.  Increase integral accuracy.
 SCF Done:  E(RB+HF-LYP) =  -229.153461386     A.U. after   14 cycles
             Convg  =    0.8418D-08             -V/T =  2.0044
             S**2   =   0.0000
 Range of M.O.s used for correlation:     1   100
 NBasis=   100 NAE=    16 NBE=    16 NFC=     0 NFV=     0
 NROrb=    100 NOA=    16 NOB=    16 NVA=    84 NVB=    84

 **** Warning!!: The largest alpha MO coefficient is  0.10292073D+02

 Symmetrizing basis deriv contribution to polar:
 IMax=3 JMax=2 DiffMx= 0.00D+00
 G2DrvN: will do    9 centers at a time, making    1 passes doing MaxLOS=2.
 FoFDir/FoFCou used for L=0 through L=2.
 DoAtom=TTTTTTTT
          Differentiating once with respect to electric field.
                with respect to dipole field.
          Differentiating once with respect to nuclear coordinates.
          Store integrals in memory, NReq=    15729412.
          There are  27 degrees of freedom in the 1st order CPHF.
    24 vectors were produced by pass  0.
 AX will form  24 AO Fock derivatives at one time.
    24 vectors were produced by pass  1.
    24 vectors were produced by pass  2.
    24 vectors were produced by pass  3.
    24 vectors were produced by pass  4.
    16 vectors were produced by pass  5.
     5 vectors were produced by pass  6.
 Inv2:  IOpt= 1 Iter= 1 AM= 1.53D-15 Conv= 1.00D-12.
 Inverted reduced A of dimension  141 with in-core refinement.
 Isotropic polarizability for W=    0.000000       30.64 Bohr**3.
 End of Minotr Frequency-dependent properties file   721 does not exist.
 ***** Axes restored to original set *****
 -------------------------------------------------------------------
 Center     Atomic                   Forces (Hartrees/Bohr)
 Number     Number              X              Y              Z
 -------------------------------------------------------------------
    1          6          -0.000006224    0.000005938    0.000005987
    2          1           0.000001594    0.000001339   -0.000002911
    3          8           0.000001573   -0.000002014    0.000005491
    4          8           0.000009809   -0.000009896   -0.000004449
    5          6           0.000000341    0.000006449   -0.000007026
    6          1           0.000001438   -0.000002642   -0.000002791
    7          1          -0.000002826    0.000001068    0.000004492
    8          1          -0.000005706   -0.000000242    0.000001205
 -------------------------------------------------------------------
 Cartesian Forces:  Max     0.000009896 RMS     0.000004763

 GradGradGradGradGradGradGradGradGradGradGradGradGradGradGradGradGradGrad
 Berny optimization.
 Internal  Forces:  Max     0.000037742 RMS     0.000009062
 Search for a local minimum.
 Step number   7 out of a maximum of  32
 All quantities printed in internal units (Hartrees-Bohrs-Radians)
 Second derivative matrix not updated -- analytic derivatives used.
 Trust test= 9.80D-01 RLast= 6.00D-02 DXMaxT set to 8.49D-01
     Eigenvalues ---    0.00226   0.02393   0.08312   0.08478   0.12557
     Eigenvalues ---    0.14042   0.17047   0.18528   0.18653   0.23707
     Eigenvalues ---    0.26580   0.33323   0.33868   0.33888   0.34775
     Eigenvalues ---    0.36333   0.43881   0.889581000.000001000.00000
     Eigenvalues --- 1000.000001000.00000
 RFO step:  Lambda=-2.27055223D-08.
 Quintic linear search produced a step of -0.01190.
 Iteration  1 RMS(Cart)=  0.00092711 RMS(Int)=  0.00000044
 Iteration  2 RMS(Cart)=  0.00000049 RMS(Int)=  0.00000003
 Variable       Old X    -DE/DX   Delta X   Delta X   Delta X     New X
                                 (Linear)    (Quad)   (Total)
    R1        2.07410   0.00000   0.00000   0.00000   0.00000   2.07410
    R2        2.26894   0.00000   0.00000   0.00000   0.00000   2.26894
    R3        2.53177   0.00000   0.00001  -0.00002  -0.00001   2.53176
    R4        2.72728   0.00000   0.00001  -0.00002  -0.00002   2.72726
    R5        2.05905   0.00000  -0.00001   0.00001   0.00000   2.05905
    R6        2.05225   0.00000   0.00001  -0.00001   0.00000   2.05225
    R7        2.05905  -0.00001   0.00000   0.00000   0.00000   2.05905
    A1        2.18111   0.00000  -0.00002   0.00001  -0.00001   2.18111
    A2        1.90438   0.00000  -0.00003   0.00001  -0.00002   1.90436
    A3        2.19769   0.00001   0.00005  -0.00002   0.00003   2.19772
    A4        2.02582   0.00004   0.00010   0.00004   0.00015   2.02597
    A5        1.92666   0.00001  -0.00004   0.00012   0.00008   1.92674
    A6        1.84120  -0.00001   0.00006  -0.00011  -0.00005   1.84116
    A7        1.92677   0.00000  -0.00005   0.00002  -0.00003   1.92674
    A8        1.93121   0.00000   0.00001   0.00002   0.00002   1.93124
    A9        1.90626   0.00000   0.00005  -0.00005   0.00000   1.90625
   A10        1.93127   0.00000  -0.00003   0.00001  -0.00002   1.93124
    D1       -3.14143  -0.00001   0.00008  -0.00025  -0.00017   3.14159
    D2        0.00016  -0.00001   0.00009  -0.00025  -0.00017  -0.00001
    D3        1.05646   0.00000  -0.00040  -0.00132  -0.00173   1.05473
    D4       -3.13987   0.00000  -0.00038  -0.00131  -0.00168  -3.14156
    D5       -1.05290  -0.00001  -0.00041  -0.00135  -0.00175  -1.05465
         Item               Value     Threshold  Converged?
 Maximum Force            0.000038     0.000015     NO 
 RMS     Force            0.000009     0.000010     YES
 Maximum Displacement     0.001796     0.000060     NO 
 RMS     Displacement     0.000927     0.000040     NO 
 Predicted change in Energy=-1.531056D-08
 GradGradGradGradGradGradGradGradGradGradGradGradGradGradGradGradGradGrad

                          Input orientation:                          
 ---------------------------------------------------------------------
 Center     Atomic     Atomic              Coordinates (Angstroms)
 Number     Number      Type              X           Y           Z
 ---------------------------------------------------------------------
    1          6             0        0.016131   -0.107976    0.039414
    2          1             0       -0.057454    0.576480    0.894258
    3          8             0        0.886172   -0.920111   -0.118950
    4          8             0       -1.014497    0.111253   -0.788035
    5          6             0       -1.065048   -0.713946   -1.970967
    6          1             0       -1.137249   -1.766107   -1.697149
    7          1             0       -1.953587   -0.396214   -2.508507
    8          1             0       -0.173414   -0.561769   -2.578471
 ---------------------------------------------------------------------
                    Distance matrix (angstroms):
                    1          2          3          4          5
     1  C    0.000000
     2  H    1.097566   0.000000
     3  O    1.200673   2.038824   0.000000
     4  O    1.339749   1.990598   2.263610   0.000000
     5  C    2.361732   3.299994   2.698097   1.443203   0.000000
     6  H    2.663707   3.656373   2.701972   2.089507   1.089602
     7  H    3.233384   4.015005   3.748157   2.024706   1.086004
     8  H    2.663678   3.656352   2.701921   2.089507   1.089601
                    6          7          8
     6  H    0.000000
     7  H    1.789222   0.000000
     8  H    1.776552   1.789223   0.000000
 Stoichiometry    C2H4O2
 Framework group  C1[X(C2H4O2)]
 Deg. of freedom    18
 Full point group                 C1
 Largest Abelian subgroup         C1      NOp   1
 Largest concise Abelian subgroup C1      NOp   1
                         Standard orientation:                         
 ---------------------------------------------------------------------
 Center     Atomic     Atomic              Coordinates (Angstroms)
 Number     Number      Type              X           Y           Z
 ---------------------------------------------------------------------
    1          6             0        0.833696    0.431301   -0.000001
    2          1             0        1.412448    1.363876   -0.000004
    3          8             0        1.306851   -0.672211    0.000001
    4          8             0       -0.473216    0.726107    0.000002
    5          6             0       -1.377356   -0.398778   -0.000001
    6          1             0       -1.222413   -1.010465    0.888292
    7          1             0       -2.374788    0.030795   -0.000036
    8          1             0       -1.222365   -1.010502   -0.888260
 ---------------------------------------------------------------------
 Rotational constants (GHZ):     20.2640792      6.7844538      5.2507150
 Standard basis: TZVP (5D, 7F)
 There are   100 symmetry adapted basis functions of A   symmetry.
 Integral buffers will be    131072 words long.
 Raffenetti 2 integral format.
 Two-electron integral symmetry is turned on.
   100 basis functions,   172 primitive gaussians,   104 cartesian basis functions
    16 alpha electrons       16 beta electrons
       nuclear repulsion energy       122.0488331739 Hartrees.
 NAtoms=    8 NActive=    8 NUniq=    8 SFac= 7.50D-01 NAtFMM=   80 NAOKFM=F Big=F
 One-electron integrals computed using PRISM.
 NBasis=   100 RedAO= T  NBF=   100
 NBsUse=   100 1.00D-06 NBFU=   100
 Initial guess read from the read-write file:
 Initial guess orbital symmetries:
       Occupied  (A) (A) (A) (A) (A) (A) (A) (A) (A) (A) (A) (A)
                 (A) (A) (A) (A)
       Virtual   (A) (A) (A) (A) (A) (A) (A) (A) (A) (A) (A) (A)
                 (A) (A) (A) (A) (A) (A) (A) (A) (A) (A) (A) (A)
                 (A) (A) (A) (A) (A) (A) (A) (A) (A) (A) (A) (A)
                 (A) (A) (A) (A) (A) (A) (A) (A) (A) (A) (A) (A)
                 (A) (A) (A) (A) (A) (A) (A) (A) (A) (A) (A) (A)
                 (A) (A) (A) (A) (A) (A) (A) (A) (A) (A) (A) (A)
                 (A) (A) (A) (A) (A) (A) (A) (A) (A) (A) (A) (A)
 Requested convergence on RMS density matrix=1.00D-08 within 128 cycles.
 Requested convergence on MAX density matrix=1.00D-06.
 Requested convergence on             energy=1.00D-06.
 No special actions if energy rises.
 Keep R1 integrals in memory in canonical form, NReq=    16895489.
 SCF Done:  E(RB+HF-LYP) =  -229.153461401     A.U. after    6 cycles
             Convg  =    0.6393D-08             -V/T =  2.0044
             S**2   =   0.0000
 Range of M.O.s used for correlation:     1   100
 NBasis=   100 NAE=    16 NBE=    16 NFC=     0 NFV=     0
 NROrb=    100 NOA=    16 NOB=    16 NVA=    84 NVB=    84

 **** Warning!!: The largest alpha MO coefficient is  0.10294509D+02

 Symmetrizing basis deriv contribution to polar:
 IMax=3 JMax=2 DiffMx= 0.00D+00
 G2DrvN: will do    9 centers at a time, making    1 passes doing MaxLOS=2.
 FoFDir/FoFCou used for L=0 through L=2.
 DoAtom=TTTTTTTT
          Differentiating once with respect to electric field.
                with respect to dipole field.
          Differentiating once with respect to nuclear coordinates.
          Store integrals in memory, NReq=    15729412.
          There are  27 degrees of freedom in the 1st order CPHF.
    24 vectors were produced by pass  0.
 AX will form  24 AO Fock derivatives at one time.
    24 vectors were produced by pass  1.
    24 vectors were produced by pass  2.
    24 vectors were produced by pass  3.
    24 vectors were produced by pass  4.
    16 vectors were produced by pass  5.
     5 vectors were produced by pass  6.
 Inv2:  IOpt= 1 Iter= 1 AM= 1.37D-15 Conv= 1.00D-12.
 Inverted reduced A of dimension  141 with in-core refinement.
 Isotropic polarizability for W=    0.000000       30.64 Bohr**3.
 End of Minotr Frequency-dependent properties file   721 does not exist.
 ***** Axes restored to original set *****
 -------------------------------------------------------------------
 Center     Atomic                   Forces (Hartrees/Bohr)
 Number     Number              X              Y              Z
 -------------------------------------------------------------------
    1          6          -0.000000227   -0.000000127   -0.000000035
    2          1           0.000000058   -0.000000076    0.000000046
    3          8           0.000000076   -0.000000134   -0.000000239
    4          8           0.000000101    0.000000293   -0.000000092
    5          6          -0.000000029   -0.000000163    0.000000303
    6          1           0.000000010    0.000000059    0.000000003
    7          1           0.000000002    0.000000051    0.000000091
    8          1           0.000000009    0.000000098   -0.000000077
 -------------------------------------------------------------------
 Cartesian Forces:  Max     0.000000303 RMS     0.000000131

 GradGradGradGradGradGradGradGradGradGradGradGradGradGradGradGradGradGrad
 Berny optimization.
 Internal  Forces:  Max     0.000000749 RMS     0.000000193
 Search for a local minimum.
 Step number   8 out of a maximum of  32
 All quantities printed in internal units (Hartrees-Bohrs-Radians)
 Second derivative matrix not updated -- analytic derivatives used.
 Trust test= 1.01D+00 RLast= 3.00D-03 DXMaxT set to 8.49D-01
     Eigenvalues ---    0.00226   0.02393   0.08312   0.08478   0.12557
     Eigenvalues ---    0.14042   0.17047   0.18527   0.18653   0.23700
     Eigenvalues ---    0.26578   0.33323   0.33868   0.33888   0.34775
     Eigenvalues ---    0.36334   0.43875   0.889571000.000001000.00000
     Eigenvalues --- 1000.000001000.00000
 RFO step:  Lambda= 0.00000000D+00.
 Quintic linear search produced a step of  0.00836.
 Iteration  1 RMS(Cart)=  0.00001667 RMS(Int)=  0.00000000
 Iteration  2 RMS(Cart)=  0.00000000 RMS(Int)=  0.00000000
 Variable       Old X    -DE/DX   Delta X   Delta X   Delta X     New X
                                 (Linear)    (Quad)   (Total)
    R1        2.07410   0.00000   0.00000   0.00000   0.00000   2.07410
    R2        2.26894   0.00000   0.00000   0.00000   0.00000   2.26894
    R3        2.53176   0.00000   0.00000   0.00000   0.00000   2.53176
    R4        2.72726   0.00000   0.00000   0.00000   0.00000   2.72726
    R5        2.05905   0.00000   0.00000   0.00000   0.00000   2.05905
    R6        2.05225   0.00000   0.00000   0.00000   0.00000   2.05225
    R7        2.05905   0.00000   0.00000   0.00000   0.00000   2.05905
    A1        2.18111   0.00000   0.00000   0.00000   0.00000   2.18111
    A2        1.90436   0.00000   0.00000   0.00000   0.00000   1.90436
    A3        2.19772   0.00000   0.00000   0.00000   0.00000   2.19772
    A4        2.02597   0.00000   0.00000   0.00000   0.00000   2.02596
    A5        1.92674   0.00000   0.00000   0.00000   0.00000   1.92674
    A6        1.84116   0.00000   0.00000   0.00000   0.00000   1.84116
    A7        1.92674   0.00000   0.00000   0.00000   0.00000   1.92674
    A8        1.93124   0.00000   0.00000   0.00000   0.00000   1.93124
    A9        1.90625   0.00000   0.00000   0.00000   0.00000   1.90625
   A10        1.93124   0.00000   0.00000   0.00000   0.00000   1.93124
    D1        3.14159   0.00000   0.00000   0.00001   0.00001  -3.14159
    D2       -0.00001   0.00000   0.00000   0.00001   0.00001   0.00000
    D3        1.05473   0.00000  -0.00001  -0.00002  -0.00004   1.05469
    D4       -3.14156   0.00000  -0.00001  -0.00002  -0.00003  -3.14159
    D5       -1.05465   0.00000  -0.00001  -0.00002  -0.00004  -1.05469
         Item               Value     Threshold  Converged?
 Maximum Force            0.000001     0.000015     YES
 RMS     Force            0.000000     0.000010     YES
 Maximum Displacement     0.000035     0.000060     YES
 RMS     Displacement     0.000017     0.000040     YES
 Predicted change in Energy=-6.017411D-12
 Optimization completed.
    -- Stationary point found.
                           ----------------------------
                           !   Optimized Parameters   !
                           ! (Angstroms and Degrees)  !
 --------------------------                            --------------------------
 ! Name  Definition              Value          Derivative Info.                !
 --------------------------------------------------------------------------------
 ! R1    R(1,2)                  1.0976         -DE/DX =    0.0                 !
 ! R2    R(1,3)                  1.2007         -DE/DX =    0.0                 !
 ! R3    R(1,4)                  1.3397         -DE/DX =    0.0                 !
 ! R4    R(4,5)                  1.4432         -DE/DX =    0.0                 !
 ! R5    R(5,6)                  1.0896         -DE/DX =    0.0                 !
 ! R6    R(5,7)                  1.086          -DE/DX =    0.0                 !
 ! R7    R(5,8)                  1.0896         -DE/DX =    0.0                 !
 ! A1    A(2,1,3)              124.9681         -DE/DX =    0.0                 !
 ! A2    A(2,1,4)              109.1119         -DE/DX =    0.0                 !
 ! A3    A(3,1,4)              125.92           -DE/DX =    0.0                 !
 ! A4    A(1,4,5)              116.0793         -DE/DX =    0.0                 !
 ! A5    A(4,5,6)              110.3942         -DE/DX =    0.0                 !
 ! A6    A(4,5,7)              105.4905         -DE/DX =    0.0                 !
 ! A7    A(4,5,8)              110.3942         -DE/DX =    0.0                 !
 ! A8    A(6,5,7)              110.6518         -DE/DX =    0.0                 !
 ! A9    A(6,5,8)              109.2202         -DE/DX =    0.0                 !
 ! A10   A(7,5,8)              110.6519         -DE/DX =    0.0                 !
 ! D1    D(2,1,4,5)           -180.0003         -DE/DX =    0.0                 !
 ! D2    D(3,1,4,5)             -0.0003         -DE/DX =    0.0                 !
 ! D3    D(1,4,5,6)             60.4315         -DE/DX =    0.0                 !
 ! D4    D(1,4,5,7)           -179.9979         -DE/DX =    0.0                 !
 ! D5    D(1,4,5,8)            -60.4272         -DE/DX =    0.0                 !
 --------------------------------------------------------------------------------
 GradGradGradGradGradGradGradGradGradGradGradGradGradGradGradGradGradGrad

                          Input orientation:                          
 ---------------------------------------------------------------------
 Center     Atomic     Atomic              Coordinates (Angstroms)
 Number     Number      Type              X           Y           Z
 ---------------------------------------------------------------------
    1          6             0        0.016131   -0.107976    0.039414
    2          1             0       -0.057454    0.576480    0.894258
    3          8             0        0.886172   -0.920111   -0.118950
    4          8             0       -1.014497    0.111253   -0.788035
    5          6             0       -1.065048   -0.713946   -1.970967
    6          1             0       -1.137249   -1.766107   -1.697149
    7          1             0       -1.953587   -0.396214   -2.508507
    8          1             0       -0.173414   -0.561769   -2.578471
 ---------------------------------------------------------------------
                    Distance matrix (angstroms):
                    1          2          3          4          5
     1  C    0.000000
     2  H    1.097566   0.000000
     3  O    1.200673   2.038824   0.000000
     4  O    1.339749   1.990598   2.263610   0.000000
     5  C    2.361732   3.299994   2.698097   1.443203   0.000000
     6  H    2.663707   3.656373   2.701972   2.089507   1.089602
     7  H    3.233384   4.015005   3.748157   2.024706   1.086004
     8  H    2.663678   3.656352   2.701921   2.089507   1.089601
                    6          7          8
     6  H    0.000000
     7  H    1.789222   0.000000
     8  H    1.776552   1.789223   0.000000
 Stoichiometry    C2H4O2
 Framework group  C1[X(C2H4O2)]
 Deg. of freedom    18
 Full point group                 C1
 Largest Abelian subgroup         C1      NOp   1
 Largest concise Abelian subgroup C1      NOp   1
                         Standard orientation:                         
 ---------------------------------------------------------------------
 Center     Atomic     Atomic              Coordinates (Angstroms)
 Number     Number      Type              X           Y           Z
 ---------------------------------------------------------------------
    1          6             0        0.833696    0.431301   -0.000001
    2          1             0        1.412448    1.363876   -0.000004
    3          8             0        1.306851   -0.672211    0.000001
    4          8             0       -0.473216    0.726107    0.000002
    5          6             0       -1.377356   -0.398778   -0.000001
    6          1             0       -1.222413   -1.010465    0.888292
    7          1             0       -2.374788    0.030795   -0.000036
    8          1             0       -1.222365   -1.010502   -0.888260
 ---------------------------------------------------------------------
 Rotational constants (GHZ):     20.2640792      6.7844538      5.2507150

 **********************************************************************

            Population analysis using the SCF density.

 **********************************************************************

 Orbital symmetries:
       Occupied  (A) (A) (A) (A) (A) (A) (A) (A) (A) (A) (A) (A)
                 (A) (A) (A) (A)
       Virtual   (A) (A) (A) (A) (A) (A) (A) (A) (A) (A) (A) (A)
                 (A) (A) (A) (A) (A) (A) (A) (A) (A) (A) (A) (A)
                 (A) (A) (A) (A) (A) (A) (A) (A) (A) (A) (A) (A)
                 (A) (A) (A) (A) (A) (A) (A) (A) (A) (A) (A) (A)
                 (A) (A) (A) (A) (A) (A) (A) (A) (A) (A) (A) (A)
                 (A) (A) (A) (A) (A) (A) (A) (A) (A) (A) (A) (A)
                 (A) (A) (A) (A) (A) (A) (A) (A) (A) (A) (A) (A)
 The electronic state is 1-A.
 Alpha  occ. eigenvalues --  -19.18872 -19.13040 -10.30915 -10.23754  -1.12198
 Alpha  occ. eigenvalues --   -1.03802  -0.75060  -0.60785  -0.54312  -0.49586
 Alpha  occ. eigenvalues --   -0.48598  -0.43711  -0.41178  -0.37535  -0.32368
 Alpha  occ. eigenvalues --   -0.29857
 Alpha virt. eigenvalues --   -0.01230   0.04547   0.06580   0.08148   0.10027
 Alpha virt. eigenvalues --    0.11536   0.14641   0.18839   0.18929   0.22696
 Alpha virt. eigenvalues --    0.23471   0.29939   0.31539   0.34110   0.37562
 Alpha virt. eigenvalues --    0.41212   0.42897   0.43375   0.44749   0.49909
 Alpha virt. eigenvalues --    0.52142   0.53254   0.55384   0.57860   0.61461
 Alpha virt. eigenvalues --    0.66251   0.78169   0.86840   1.18546   1.20378
 Alpha virt. eigenvalues --    1.23708   1.24110   1.27452   1.27858   1.33154
 Alpha virt. eigenvalues --    1.36836   1.39463   1.43832   1.50039   1.53318
 Alpha virt. eigenvalues --    1.56603   1.70868   1.73809   1.77022   1.78601
 Alpha virt. eigenvalues --    1.86407   1.90596   1.94788   2.01194   2.09981
 Alpha virt. eigenvalues --    2.20150   2.27528   2.32841   2.33789   2.41962
 Alpha virt. eigenvalues --    2.47733   2.54918   2.58288   2.59967   2.63987
 Alpha virt. eigenvalues --    2.64293   2.66124   2.67412   2.69957   2.70013
 Alpha virt. eigenvalues --    2.89948   2.94345   2.96018   2.98414   3.06202
 Alpha virt. eigenvalues --    3.08061   3.12511   3.24044   3.24999   3.29036
 Alpha virt. eigenvalues --    3.31206   3.55634   3.82674   4.06909   4.23296
 Alpha virt. eigenvalues --   21.87248  21.99960  43.37588  43.48299
          Condensed to atoms (all electrons):
              1          2          3          4          5          6
     1  C    4.600989   0.414564   0.549727   0.264382  -0.054859  -0.009963
     2  H    0.414564   0.642860  -0.059660  -0.101188   0.009714  -0.000110
     3  O    0.549727  -0.059660   7.930552  -0.118741   0.011646   0.005382
     4  O    0.264382  -0.101188  -0.118741   8.100501   0.185085  -0.035085
     5  C   -0.054859   0.009714   0.011646   0.185085   4.822247   0.413645
     6  H   -0.009963  -0.000110   0.005382  -0.035085   0.413645   0.558448
     7  H    0.011717   0.000846   0.002746  -0.038267   0.384507  -0.028673
     8  H   -0.009964  -0.000109   0.005384  -0.035085   0.413645  -0.039245
              7          8
     1  C    0.011717  -0.009964
     2  H    0.000846  -0.000109
     3  O    0.002746   0.005384
     4  O   -0.038267  -0.035085
     5  C    0.384507   0.413645
     6  H   -0.028673  -0.039245
     7  H    0.559217  -0.028673
     8  H   -0.028673   0.558447
 Mulliken atomic charges:
              1
     1  C    0.233407
     2  H    0.093083
     3  O   -0.327037
     4  O   -0.221603
     5  C   -0.185631
     6  H    0.135600
     7  H    0.136580
     8  H    0.135600
 Sum of Mulliken charges=   0.00000
 Atomic charges with hydrogens summed into heavy atoms:
              1
     1  C    0.326490
     2  H    0.000000
     3  O   -0.327037
     4  O   -0.221603
     5  C    0.222149
     6  H    0.000000
     7  H    0.000000
     8  H    0.000000
 Sum of Mulliken charges=   0.00000
 APT atomic charges:
              1
     1  C    1.084068
     2  H   -0.007943
     3  O   -0.688110
     4  O   -0.818844
     5  C    0.438894
     6  H   -0.009683
     7  H    0.011299
     8  H   -0.009680
 Sum of APT charges=   0.00000
 APT Atomic charges with hydrogens summed into heavy atoms:
              1
     1  C    1.076125
     2  H    0.000000
     3  O   -0.688110
     4  O   -0.818844
     5  C    0.430829
     6  H    0.000000
     7  H    0.000000
     8  H    0.000000
 Sum of APT charges=   0.00000
 Electronic spatial extent (au):  <R**2>=   256.7968
 Charge=     0.0000 electrons
 Dipole moment (field-independent basis, Debye):
    X=    -1.7716    Y=     0.8087    Z=     0.0000  Tot=     1.9474
 Quadrupole moment (field-independent basis, Debye-Ang):
   XX=   -23.3548   YY=   -25.0221   ZZ=   -23.1700
   XY=     4.8799   XZ=     0.0000   YZ=     0.0000
 Traceless Quadrupole moment (field-independent basis, Debye-Ang):
   XX=     0.4941   YY=    -1.1732   ZZ=     0.6790
   XY=     4.8799   XZ=     0.0000   YZ=     0.0000
 Octapole moment (field-independent basis, Debye-Ang**2):
  XXX=    -7.1309  YYY=     1.0088  ZZZ=     0.0001  XYY=     1.1468
  XXY=     4.4831  XXZ=     0.0000  XZZ=     0.6650  YZZ=    -0.6951
  YYZ=     0.0000  XYZ=     0.0000
 Hexadecapole moment (field-independent basis, Debye-Ang**3):
 XXXX=  -206.3934 YYYY=   -83.1493 ZZZZ=   -27.8676 XXXY=     3.0000
 XXXZ=     0.0002 YYYX=     2.3791 YYYZ=     0.0001 ZZZX=    -0.0001
 ZZZY=     0.0000 XXYY=   -48.3087 XXZZ=   -40.4326 YYZZ=   -17.9619
 XXYZ=    -0.0001 YYXZ=     0.0000 ZZXY=     0.0311
 N-N= 1.220488331739D+02 E-N=-7.818848570886D+02  KE= 2.281563361953D+02
  Exact polarizability:  36.931  -0.185  31.970   0.000   0.000  23.011
 Approx polarizability:  47.020  -6.191  47.880   0.000   0.000  30.275
 Rotating derivatives to standard orientation.
 Full mass-weighted force constant matrix:
 Low frequencies ---    0.0009    0.0016    0.0018    2.2195    2.9025    5.4927
 Low frequencies ---  131.1722  298.1146  346.8104
 Diagonal vibrational polarizability:
       11.9890930       2.6441299       7.0078466
 Harmonic frequencies (cm**-1), IR intensities (KM/Mole), Raman scattering
 activities (A**4/AMU), depolarization ratios for plane and unpolarized
 incident light, reduced masses (AMU), force constants (mDyne/A),
 and normal coordinates:
                     1                      2                      3
                     A                      A                      A
 Frequencies --   131.1721               298.1146               346.8104
 Red. masses --     1.0792                 3.9390                 2.3757
 Frc consts  --     0.0109                 0.2063                 0.1684
 IR Inten    --     0.1683                14.4473                29.2826
 Atom AN      X      Y      Z        X      Y      Z        X      Y      Z
   1   6     0.00   0.00  -0.01     0.03  -0.05   0.00     0.00   0.00   0.21
   2   1     0.00   0.00  -0.05    -0.15   0.06   0.00     0.00   0.00   0.83
   3   8     0.00   0.00   0.06     0.30   0.07   0.00     0.00   0.00  -0.11
   4   8     0.00   0.00  -0.04     0.00  -0.15   0.00     0.00   0.00  -0.20
   5   6     0.00   0.00  -0.01    -0.31   0.11   0.00     0.00   0.00   0.09
   6   1     0.39  -0.31  -0.29    -0.52   0.06   0.01     0.16   0.16   0.17
   7   1     0.00   0.00   0.57    -0.18   0.42   0.00     0.00   0.00   0.19
   8   1    -0.39   0.31  -0.29    -0.52   0.06  -0.01    -0.16  -0.16   0.17
                     4                      5                      6
                     A                      A                      A
 Frequencies --   778.5088               922.8702              1038.5629
 Red. masses --     4.9899                 5.3554                 1.6541
 Frc consts  --     1.7818                 2.6874                 1.0512
 IR Inten    --     7.9575                25.3147                 0.0292
 Atom AN      X      Y      Z        X      Y      Z        X      Y      Z
   1   6     0.15   0.24   0.00     0.24   0.07   0.00     0.00   0.00   0.23
   2   1     0.16   0.24   0.00     0.51  -0.09   0.00     0.00   0.00  -0.97
   3   8    -0.27   0.11   0.00     0.01  -0.05   0.00     0.00   0.00  -0.06
   4   8     0.23  -0.25   0.00     0.05   0.30   0.00     0.00   0.00  -0.05
   5   6    -0.06  -0.09   0.00    -0.31  -0.33   0.00     0.00   0.00   0.00
   6   1    -0.40  -0.14   0.02    -0.14  -0.23   0.02    -0.02  -0.03  -0.01
   7   1     0.19   0.49   0.00    -0.32  -0.35   0.00     0.00   0.00   0.00
   8   1    -0.40  -0.14  -0.02    -0.14  -0.23  -0.02     0.02   0.03  -0.01
                     7                      8                      9
                     A                      A                      A
 Frequencies --  1173.8831              1179.5992              1227.4217
 Red. masses --     1.2763                 2.5603                 2.3443
 Frc consts  --     1.0362                 2.0990                 2.0809
 IR Inten    --     1.1300               152.1528               172.6786
 Atom AN      X      Y      Z        X      Y      Z        X      Y      Z
   1   6     0.00   0.00   0.01    -0.25  -0.08   0.00     0.16   0.03   0.00
   2   1     0.00   0.00  -0.09    -0.13  -0.14   0.00     0.21  -0.01   0.00
   3   8     0.00   0.00   0.00     0.04   0.03   0.00     0.01  -0.04   0.00
   4   8     0.00   0.00   0.06     0.13   0.12   0.00    -0.22   0.02   0.00
   5   6     0.00   0.00  -0.14     0.06  -0.16   0.00     0.16  -0.03   0.00
   6   1     0.35   0.54   0.17    -0.33  -0.07   0.12    -0.50  -0.07   0.09
   7   1     0.00   0.00   0.30     0.41   0.64   0.00     0.35   0.46   0.00
   8   1    -0.35  -0.54   0.17    -0.33  -0.07  -0.12    -0.50  -0.07  -0.09
                    10                     11                     12
                     A                      A                      A
 Frequencies --  1407.3377              1473.1501              1488.1471
 Red. masses --     1.1373                 1.1751                 1.0450
 Frc consts  --     1.3271                 1.5026                 1.3635
 IR Inten    --     1.8193                 4.0136                 9.7995
 Atom AN      X      Y      Z        X      Y      Z        X      Y      Z
   1   6    -0.05  -0.01   0.00    -0.03  -0.03   0.00     0.00   0.00   0.00
   2   1     0.81  -0.57   0.00     0.00  -0.05   0.00     0.00   0.00  -0.02
   3   8     0.00   0.07   0.00    -0.01   0.03   0.00     0.00   0.00   0.00
   4   8    -0.02  -0.04   0.00     0.05   0.02   0.00     0.00   0.00   0.01
   5   6    -0.01   0.02   0.00     0.07   0.06   0.00     0.00   0.00   0.06
   6   1     0.06   0.00  -0.02    -0.47  -0.21  -0.08     0.48  -0.02  -0.06
   7   1     0.00   0.02   0.00    -0.23  -0.62   0.00     0.00   0.00  -0.73
   8   1     0.06   0.00   0.02    -0.47  -0.21   0.08    -0.48   0.02  -0.06
                    13                     14                     15
                     A                      A                      A
 Frequencies --  1498.8039              1796.1020              3044.0224
 Red. masses --     1.0468                 8.9624                 1.0894
 Frc consts  --     1.3855                17.0349                 5.9473
 IR Inten    --    10.3475               315.3548                61.6338
 Atom AN      X      Y      Z        X      Y      Z        X      Y      Z
   1   6     0.00   0.00   0.00    -0.30   0.59   0.00    -0.04  -0.07   0.00
   2   1     0.03  -0.02   0.00     0.49   0.17   0.00     0.53   0.83   0.00
   3   8     0.00   0.01   0.00     0.18  -0.42   0.00     0.00   0.00   0.00
   4   8     0.01  -0.02   0.00     0.03  -0.04   0.00     0.00   0.00   0.00
   5   6     0.02  -0.05   0.00     0.02   0.03   0.00     0.00   0.00   0.00
   6   1    -0.13   0.53   0.40    -0.14  -0.03  -0.03    -0.01   0.05  -0.07
   7   1    -0.09  -0.26   0.00    -0.08  -0.20   0.00     0.06  -0.03   0.00
   8   1    -0.13   0.53  -0.40    -0.14  -0.03   0.03    -0.01   0.05   0.07
                    16                     17                     18
                     A                      A                      A
 Frequencies --  3057.6472              3129.9602              3167.2619
 Red. masses --     1.0314                 1.1074                 1.1061
 Frc consts  --     5.6816                 6.3917                 6.5378
 IR Inten    --    13.2079                18.5359                11.8983
 Atom AN      X      Y      Z        X      Y      Z        X      Y      Z
   1   6     0.01   0.01   0.00     0.00   0.00   0.00     0.00   0.00   0.00
   2   1    -0.07  -0.11   0.00     0.00   0.00   0.00     0.00   0.01   0.00
   3   8     0.00   0.00   0.00     0.00   0.00   0.00     0.00   0.00   0.00
   4   8     0.00   0.00   0.00     0.00   0.00   0.00     0.00   0.00   0.00
   5   6    -0.02  -0.04   0.00     0.00   0.00   0.10     0.08  -0.06   0.00
   6   1    -0.09   0.34  -0.52    -0.12   0.39  -0.57    -0.03   0.15  -0.25
   7   1     0.39  -0.17   0.00     0.00   0.00   0.02    -0.83   0.37   0.00
   8   1    -0.09   0.34   0.52     0.12  -0.39  -0.57    -0.03   0.15   0.25

 -------------------
 - Thermochemistry -
 -------------------
 Temperature   298.150 Kelvin.  Pressure   1.00000 Atm.
 Atom  1 has atomic number  6 and mass  12.00000
 Atom  2 has atomic number  1 and mass   1.00783
 Atom  3 has atomic number  8 and mass  15.99491
 Atom  4 has atomic number  8 and mass  15.99491
 Atom  5 has atomic number  6 and mass  12.00000
 Atom  6 has atomic number  1 and mass   1.00783
 Atom  7 has atomic number  1 and mass   1.00783
 Atom  8 has atomic number  1 and mass   1.00783
 Molecular mass:    60.02113 amu.
 Principal axes and moments of inertia in atomic units:
                           1         2         3
     EIGENVALUES --    89.06110 266.01128 343.71342
           X            0.99617   0.08749   0.00000
           Y           -0.08749   0.99617   0.00000
           Z            0.00000   0.00000   1.00000
 This molecule is an asymmetric top.
 Rotational symmetry number  1.
 Rotational temperatures (Kelvin)      0.97252     0.32560     0.25199
 Rotational constants (GHZ):          20.26408     6.78445     5.25072
 Zero-point vibrational energy     162449.1 (Joules/Mol)
                                   38.82628 (Kcal/Mol)
 Warning -- explicit consideration of   3 degrees of freedom as
           vibrations may cause significant error
 Vibrational temperatures:    188.73   428.92   498.98  1120.10  1327.80
          (Kelvin)           1494.26  1688.95  1697.18  1765.98  2024.84
                             2119.53  2141.11  2156.44  2584.19  4379.66
                             4399.27  4503.31  4556.98
 
 Zero-point correction=                           0.061874 (Hartree/Particle)
 Thermal correction to Energy=                    0.066412
 Thermal correction to Enthalpy=                  0.067356
 Thermal correction to Gibbs Free Energy=         0.035064
 Sum of electronic and zero-point Energies=           -229.091588
 Sum of electronic and thermal Energies=              -229.087049
 Sum of electronic and thermal Enthalpies=            -229.086105
 Sum of electronic and thermal Free Energies=         -229.118398
 
                     E (Thermal)             CV                S
                      KCal/Mol        Cal/Mol-Kelvin    Cal/Mol-Kelvin
 Total                   41.674             13.630             67.966
 Electronic               0.000              0.000              0.000
 Translational            0.889              2.981             38.196
 Rotational               0.889              2.981             23.614
 Vibrational             39.897              7.668              6.156
 Vibration  1             0.612              1.922              2.929
 Vibration  2             0.691              1.677              1.427
 Vibration  3             0.725              1.582              1.181
                       Q            Log10(Q)             Ln(Q)
 Total Bot       0.744632D-16        -16.128059        -37.136227
 Total V=0       0.214668D+13         12.331767         28.394942
 Vib (Bot)       0.126122D-27        -27.899209        -64.240302
 Vib (Bot)  1    0.155372D+01          0.191374          0.440655
 Vib (Bot)  2    0.638607D+00         -0.194766         -0.448466
 Vib (Bot)  3    0.533088D+00         -0.273201         -0.629070
 Vib (V=0)       0.363594D+01          0.560616          1.290867
 Vib (V=0)  1    0.213219D+01          0.328827          0.757152
 Vib (V=0)  2    0.131106D+01          0.117623          0.270836
 Vib (V=0)  3    0.123088D+01          0.090215          0.207728
 Electronic      0.100000D+01          0.000000          0.000000
 Translational   0.182773D+08          7.261911         16.721169
 Rotational      0.323027D+05          4.509239         10.382906
 ***** Axes restored to original set *****
 -------------------------------------------------------------------
 Center     Atomic                   Forces (Hartrees/Bohr)
 Number     Number              X              Y              Z
 -------------------------------------------------------------------
    1          6          -0.000000227   -0.000000127   -0.000000035
    2          1           0.000000058   -0.000000076    0.000000046
    3          8           0.000000076   -0.000000134   -0.000000239
    4          8           0.000000101    0.000000293   -0.000000092
    5          6          -0.000000029   -0.000000163    0.000000303
    6          1           0.000000010    0.000000059    0.000000003
    7          1           0.000000002    0.000000051    0.000000091
    8          1           0.000000009    0.000000098   -0.000000077
 -------------------------------------------------------------------
 Cartesian Forces:  Max     0.000000303 RMS     0.000000131
 Final structure in terms of initial Z-matrix:
 C
 H,1,B1
 O,1,B2,2,A1
 O,1,B3,3,A2,2,D1,0
 C,4,B4,1,A3,3,D2,0
 H,5,B5,4,A4,1,D3,0
 H,5,B6,4,A5,1,D4,0
 H,5,B7,4,A6,1,D5,0
      Variables:
 B1=1.0975665
 B2=1.20067256
 B3=1.33974923
 B4=1.44320318
 B5=1.08960183
 B6=1.08600409
 B7=1.0896014
 A1=124.96811537
 A2=125.92001507
 A3=116.07928315
 A4=110.39416298
 A5=105.490458
 A6=110.39424908
 D1=180.
 D2=-0.00034516
 D3=60.43154286
 D4=-179.99793534
 D5=-60.42722673
 1\1\RECHENZENTRUM RWTH AACHEN-SRVMBFD\Freq\RB3LYP\TZVP\C2H4O2\JENS\29-
 Jun-2012\0\\# opt=(tight,calcall) freq B3LYP TZVP int=ultrafine maxdis
 k=300GB\\Title Card Required\\0,1\C,0.0161305004,-0.1079756777,0.03941
 44791\H,-0.0574536277,0.576480223,0.8942581593\O,0.88617182,-0.9201108
 337,-0.1189496373\O,-1.0144971015,0.1112533031,-0.7880354547\C,-1.0650
 47951,-0.7139459524,-1.9709666511\H,-1.1372485426,-1.7661071701,-1.697
 1492029\H,-1.9535869861,-0.3962141323,-2.5085071233\H,-0.1734137129,-0
 .5617693108,-2.5784712751\\Version=AM64L-G03RevE.01\State=1-A\HF=-229.
 1534614\RMSD=6.393e-09\RMSF=1.314e-07\ZeroPoint=0.0618736\Thermal=0.06
 64123\Dipole=-0.6298664,0.2352282,-0.3673503\DipoleDeriv=1.4654166,-0.
 433543,0.7022765,-0.6078674,0.757248,-0.0145393,0.464059,0.1760916,1.0
 295395,0.0566196,0.0287647,-0.0048529,0.027014,-0.010943,-0.1179665,-0
 .0072447,-0.1160519,-0.0695061,-0.9039966,0.2460594,-0.2529236,0.45729
 98,-0.6570144,0.1013438,0.0357372,-0.1296553,-0.5033205,-0.9219404,0.1
 161999,-0.5177903,0.091214,-0.4769831,-0.1376841,-0.5519339,-0.110364,
 -1.057607,0.3041314,0.037376,0.054432,0.091035,0.3759977,0.2019461,0.1
 277642,0.1432679,0.6365522,0.0733001,-0.0004457,0.0043145,-0.0531119,-
 0.0874923,-0.0268114,-0.0122529,0.0604055,-0.0148565,-0.0354378,0.0347
 511,-0.0910526,0.0549258,0.0578804,0.01448,-0.0634848,-0.0075839,0.011
 4533,-0.0380929,-0.0291624,0.1055964,-0.0605094,0.0413066,-0.0207686,0
 .007356,-0.0161099,-0.0322549\Polar=31.7265428,-3.3936277,27.8533,4.89
 32001,2.9057353,32.3326717\PG=C01 [X(C2H4O2)]\NImag=0\\0.64805119,-0.3
 3980598,0.63879385,0.03317093,0.23746736,0.55386313,-0.05302641,0.0043
 1346,0.01504404,0.05717442,0.00042240,-0.14597277,-0.11511610,-0.02466
 980,0.14760834,0.00972687,-0.11086104,-0.20224857,0.00118855,0.1402124
 7,0.21816010,-0.41597716,0.32717471,0.07202966,-0.00051431,0.01967080,
 0.00391151,0.48627577,0.32093174,-0.40063135,-0.09675649,0.03092899,-0
 .01298889,-0.01192656,-0.40273638,0.41421376,0.06349871,-0.08992968,-0
 .12645295,0.01929593,-0.02423781,0.00846935,-0.05060668,0.08559756,0.0
 9091606,-0.17939684,0.03081235,-0.08524146,-0.00230286,0.00158270,-0.0
 1045675,-0.06995425,0.05448959,-0.03392497,0.32354624,0.02442064,-0.09
 592732,-0.01836988,-0.01340906,0.00726365,-0.01736012,0.05345636,0.002
 78817,0.02241880,-0.08419381,0.21800997,-0.09397618,-0.01138035,-0.181
 25937,-0.03094308,-0.00096610,-0.02592035,-0.03533704,0.02354883,0.022
 69723,0.15271833,0.09832779,0.38004937,-0.00338764,-0.01975552,-0.0334
 9986,-0.00096650,0.00303317,-0.00473187,0.00012537,-0.00444341,0.00168
 204,-0.08083346,0.01784565,0.01025162,0.61342455,-0.01640030,0.0092679
 8,-0.00876691,0.00406069,0.00440692,0.00069073,0.00549333,-0.00782324,
 0.00483486,0.00535793,-0.11477220,-0.05818220,-0.01440365,0.53684575,-
 0.02891556,-0.01243541,-0.04605436,-0.00332774,-0.00043289,0.00292042,
 0.01526088,-0.00603183,0.00148034,-0.00681286,-0.04452680,-0.13620407,
 0.00899725,-0.08455745,0.48148726,0.00273109,-0.00322055,-0.00029529,-
 0.00000430,0.00039651,-0.00011640,-0.00055282,0.00147391,0.00114801,-0
 .00052984,-0.00113190,-0.00106917,-0.05239821,-0.01592828,0.00475613,0
 .04734957,0.00566035,-0.00190092,0.00291930,-0.00014452,0.00008557,-0.
 00023934,-0.00189987,0.00214204,0.00080996,-0.00361185,-0.02064921,-0.
 01112943,-0.01815743,-0.29181076,0.07257296,0.01884065,0.32053574,0.00
 414787,-0.00393733,0.00246490,0.00065792,0.00098606,-0.00080658,-0.002
 11775,0.00140175,0.00013619,-0.00600887,-0.03848599,-0.00178688,0.0059
 5584,0.08076975,-0.07322778,-0.00538293,-0.07112249,0.07860587,0.00034
 014,0.00068661,0.00108110,0.00008004,0.00005641,-0.00003784,0.00045414
 ,-0.00057105,-0.00093904,0.00173817,-0.00165189,-0.00063071,-0.2399610
 7,0.06890315,-0.11035086,0.00416326,-0.00087411,0.00301832,0.25128075,
 0.00280659,-0.00410353,-0.00282479,-0.00072361,0.00020611,-0.00076248,
 -0.00028359,0.00189775,0.00146431,-0.02176344,0.00343225,-0.01945347,0
 .07543746,-0.07779709,0.04856021,0.02543111,-0.00564576,0.01366670,-0.
 07529002,0.07968090,0.00397858,-0.00514307,-0.00246825,-0.00110370,0.0
 0009040,-0.00089821,-0.00054620,0.00115011,0.00157357,-0.02811369,0.00
 254067,-0.02702223,-0.10142177,0.04141419,-0.10728447,-0.00675181,0.00
 331224,-0.00264387,0.12040943,-0.03781939,0.12710351,0.00066563,-0.000
 20508,-0.00228912,-0.00044009,-0.00049218,0.00051593,0.00014326,-0.000
 07339,-0.00015401,0.00773282,0.00466401,-0.00101378,-0.23600303,-0.037
 08287,0.12039276,-0.00075876,0.00018678,-0.00027040,-0.01809544,-0.005
 61452,0.01354915,0.24675561,0.00196456,0.00047407,0.00144752,-0.000356
 16,-0.00060894,0.00024636,-0.00087536,0.00040176,-0.00095800,0.0173265
 4,-0.00014532,-0.02076507,-0.03955628,-0.05831737,0.02685119,-0.025861
 45,-0.00275671,0.01672154,0.00874089,0.00232936,-0.00554515,0.03861725
 ,0.05862314,0.00836879,-0.00378048,0.00215546,-0.00081193,-0.00053602,
 0.00032383,-0.00259439,0.00301663,0.00118021,0.01784027,-0.00454447,-0
 .03055371,0.11276675,0.02379703,-0.12311735,0.00771146,0.00287679,-0.0
 0274184,-0.01255040,-0.00283108,0.01163995,-0.13073054,-0.01799840,0.1
 4111346\\0.00000023,0.00000013,0.00000003,-0.00000006,0.00000008,-0.00
 000005,-0.00000008,0.00000013,0.00000024,-0.00000010,-0.00000029,0.000
 00009,0.00000003,0.00000016,-0.00000030,0.,-0.00000006,0.,0.,-0.000000
 05,-0.00000009,0.,-0.00000010,0.00000008\\\@


 ASKING DUMB QUESTIONS IS EASIER THAN CORECTING DUMB MISTAKES.
 Job cpu time:  0 days  0 hours 48 minutes 23.4 seconds.
 File lengths (MBytes):  RWF=     24 Int=      0 D2E=      0 Chk=     10 Scr=      1
 Normal termination of Gaussian 03 at Fri Jun 29 10:19:57 2012.
 Link1:  Proceeding to internal job step number  2.
 --------------------------------------------------------------
 #N Geom=AllCheck Guess=Read SCRF=Check GenChk RB3LYP/TZVP Freq
 --------------------------------------------------------------
 1/7=10,10=4,29=7,30=1,38=1,40=1,46=1/1,3;
 2/40=1/2;
 3/5=19,7=101,11=2,16=1,25=1,30=1,70=2,71=2,74=-5,75=5/1,2,3;
 4/5=1,7=1/1;
 5/5=2,38=6/2;
 8/6=4,10=90,11=11/1;
 11/6=1,8=1,9=11,15=111,16=1/1,2,10;
 10/6=1/2;
 6/7=2,8=2,9=2,10=2,18=1,28=1/1;
 7/8=1,10=1,25=1/1,2,3,16;
 1/10=4,30=1,46=1/3;
 99//99;
 -------------------
 Title Card Required
 -------------------
 Redundant internal coordinates taken from checkpoint file:
 MeF_opt_freq_B3LYP_TZVP.chk
 Charge =  0 Multiplicity = 1
 C,0,0.0161305004,-0.1079756777,0.0394144791
 H,0,-0.0574536277,0.576480223,0.8942581593
 O,0,0.88617182,-0.9201108337,-0.1189496373
 O,0,-1.0144971015,0.1112533031,-0.7880354547
 C,0,-1.065047951,-0.7139459524,-1.9709666511
 H,0,-1.1372485426,-1.7661071701,-1.6971492029
 H,0,-1.9535869861,-0.3962141323,-2.5085071233
 H,0,-0.1734137129,-0.5617693108,-2.5784712751
 Recover connectivity data from disk.

 GradGradGradGradGradGradGradGradGradGradGradGradGradGradGradGradGradGrad
 Berny optimization.
 Initialization pass.
                           ----------------------------
                           !    Initial Parameters    !
                           ! (Angstroms and Degrees)  !
 --------------------------                            --------------------------
 ! Name  Definition              Value          Derivative Info.                !
 --------------------------------------------------------------------------------
 ! R1    R(1,2)                  1.0976         calculate D2E/DX2 analytically  !
 ! R2    R(1,3)                  1.2007         calculate D2E/DX2 analytically  !
 ! R3    R(1,4)                  1.3397         calculate D2E/DX2 analytically  !
 ! R4    R(4,5)                  1.4432         calculate D2E/DX2 analytically  !
 ! R5    R(5,6)                  1.0896         calculate D2E/DX2 analytically  !
 ! R6    R(5,7)                  1.086          calculate D2E/DX2 analytically  !
 ! R7    R(5,8)                  1.0896         calculate D2E/DX2 analytically  !
 ! A1    A(2,1,3)              124.9681         calculate D2E/DX2 analytically  !
 ! A2    A(2,1,4)              109.1119         calculate D2E/DX2 analytically  !
 ! A3    A(3,1,4)              125.92           calculate D2E/DX2 analytically  !
 ! A4    A(1,4,5)              116.0793         calculate D2E/DX2 analytically  !
 ! A5    A(4,5,6)              110.3942         calculate D2E/DX2 analytically  !
 ! A6    A(4,5,7)              105.4905         calculate D2E/DX2 analytically  !
 ! A7    A(4,5,8)              110.3942         calculate D2E/DX2 analytically  !
 ! A8    A(6,5,7)              110.6518         calculate D2E/DX2 analytically  !
 ! A9    A(6,5,8)              109.2202         calculate D2E/DX2 analytically  !
 ! A10   A(7,5,8)              110.6519         calculate D2E/DX2 analytically  !
 ! D1    D(2,1,4,5)            179.9997         calculate D2E/DX2 analytically  !
 ! D2    D(3,1,4,5)             -0.0003         calculate D2E/DX2 analytically  !
 ! D3    D(1,4,5,6)             60.4315         calculate D2E/DX2 analytically  !
 ! D4    D(1,4,5,7)           -179.9979         calculate D2E/DX2 analytically  !
 ! D5    D(1,4,5,8)            -60.4272         calculate D2E/DX2 analytically  !
 --------------------------------------------------------------------------------
 Trust Radius=3.00D-01 FncErr=1.00D-07 GrdErr=1.00D-07
 Number of steps in this run=   2 maximum allowed number of steps=   2.
 GradGradGradGradGradGradGradGradGradGradGradGradGradGradGradGradGradGrad

                          Input orientation:                          
 ---------------------------------------------------------------------
 Center     Atomic     Atomic              Coordinates (Angstroms)
 Number     Number      Type              X           Y           Z
 ---------------------------------------------------------------------
    1          6             0        0.016131   -0.107976    0.039414
    2          1             0       -0.057454    0.576480    0.894258
    3          8             0        0.886172   -0.920111   -0.118950
    4          8             0       -1.014497    0.111253   -0.788035
    5          6             0       -1.065048   -0.713946   -1.970967
    6          1             0       -1.137249   -1.766107   -1.697149
    7          1             0       -1.953587   -0.396214   -2.508507
    8          1             0       -0.173414   -0.561769   -2.578471
 ---------------------------------------------------------------------
                    Distance matrix (angstroms):
                    1          2          3          4          5
     1  C    0.000000
     2  H    1.097566   0.000000
     3  O    1.200673   2.038824   0.000000
     4  O    1.339749   1.990598   2.263610   0.000000
     5  C    2.361732   3.299994   2.698097   1.443203   0.000000
     6  H    2.663707   3.656373   2.701972   2.089507   1.089602
     7  H    3.233384   4.015005   3.748157   2.024706   1.086004
     8  H    2.663678   3.656352   2.701921   2.089507   1.089601
                    6          7          8
     6  H    0.000000
     7  H    1.789222   0.000000
     8  H    1.776552   1.789223   0.000000
 Stoichiometry    C2H4O2
 Framework group  C1[X(C2H4O2)]
 Deg. of freedom    18
 Full point group                 C1
 Largest Abelian subgroup         C1      NOp   1
 Largest concise Abelian subgroup C1      NOp   1
                         Standard orientation:                         
 ---------------------------------------------------------------------
 Center     Atomic     Atomic              Coordinates (Angstroms)
 Number     Number      Type              X           Y           Z
 ---------------------------------------------------------------------
    1          6             0        0.833696    0.431301   -0.000001
    2          1             0        1.412448    1.363876   -0.000004
    3          8             0        1.306851   -0.672211    0.000001
    4          8             0       -0.473216    0.726107    0.000002
    5          6             0       -1.377356   -0.398778   -0.000001
    6          1             0       -1.222413   -1.010465    0.888292
    7          1             0       -2.374788    0.030795   -0.000036
    8          1             0       -1.222365   -1.010502   -0.888260
 ---------------------------------------------------------------------
 Rotational constants (GHZ):     20.2640792      6.7844538      5.2507150
 Standard basis: TZVP (5D, 7F)
 There are   100 symmetry adapted basis functions of A   symmetry.
 Integral buffers will be    131072 words long.
 Raffenetti 2 integral format.
 Two-electron integral symmetry is turned on.
   100 basis functions,   172 primitive gaussians,   104 cartesian basis functions
    16 alpha electrons       16 beta electrons
       nuclear repulsion energy       122.0488331739 Hartrees.
 NAtoms=    8 NActive=    8 NUniq=    8 SFac= 7.50D-01 NAtFMM=   80 NAOKFM=F Big=F
 One-electron integrals computed using PRISM.
 NBasis=   100 RedAO= T  NBF=   100
 NBsUse=   100 1.00D-06 NBFU=   100
 Initial guess read from the checkpoint file:
 MeF_opt_freq_B3LYP_TZVP.chk
 Initial guess orbital symmetries:
       Occupied  (A) (A) (A) (A) (A) (A) (A) (A) (A) (A) (A) (A)
                 (A) (A) (A) (A)
       Virtual   (A) (A) (A) (A) (A) (A) (A) (A) (A) (A) (A) (A)
                 (A) (A) (A) (A) (A) (A) (A) (A) (A) (A) (A) (A)
                 (A) (A) (A) (A) (A) (A) (A) (A) (A) (A) (A) (A)
                 (A) (A) (A) (A) (A) (A) (A) (A) (A) (A) (A) (A)
                 (A) (A) (A) (A) (A) (A) (A) (A) (A) (A) (A) (A)
                 (A) (A) (A) (A) (A) (A) (A) (A) (A) (A) (A) (A)
                 (A) (A) (A) (A) (A) (A) (A) (A) (A) (A) (A) (A)
 Requested convergence on RMS density matrix=1.00D-08 within 128 cycles.
 Requested convergence on MAX density matrix=1.00D-06.
 Requested convergence on             energy=1.00D-06.
 No special actions if energy rises.
 Keep R1 integrals in memory in canonical form, NReq=    16895489.
 SCF Done:  E(RB+HF-LYP) =  -229.153461401     A.U. after    1 cycles
             Convg  =    0.2601D-08             -V/T =  2.0044
             S**2   =   0.0000
 Range of M.O.s used for correlation:     1   100
 NBasis=   100 NAE=    16 NBE=    16 NFC=     0 NFV=     0
 NROrb=    100 NOA=    16 NOB=    16 NVA=    84 NVB=    84

 **** Warning!!: The largest alpha MO coefficient is  0.10294508D+02

 Symmetrizing basis deriv contribution to polar:
 IMax=3 JMax=2 DiffMx= 0.00D+00
 G2DrvN: will do    9 centers at a time, making    1 passes doing MaxLOS=2.
 FoFDir/FoFCou used for L=0 through L=2.
 DoAtom=TTTTTTTT
          Differentiating once with respect to electric field.
                with respect to dipole field.
          Differentiating once with respect to nuclear coordinates.
          Store integrals in memory, NReq=    15729412.
          There are  27 degrees of freedom in the 1st order CPHF.
    24 vectors were produced by pass  0.
 AX will form  24 AO Fock derivatives at one time.
    24 vectors were produced by pass  1.
    24 vectors were produced by pass  2.
    24 vectors were produced by pass  3.
    24 vectors were produced by pass  4.
    16 vectors were produced by pass  5.
     5 vectors were produced by pass  6.
 Inv2:  IOpt= 1 Iter= 1 AM= 1.62D-15 Conv= 1.00D-12.
 Inverted reduced A of dimension  141 with in-core refinement.
 Isotropic polarizability for W=    0.000000       30.64 Bohr**3.
 End of Minotr Frequency-dependent properties file   721 does not exist.

 **********************************************************************

            Population analysis using the SCF density.

 **********************************************************************

 Orbital symmetries:
       Occupied  (A) (A) (A) (A) (A) (A) (A) (A) (A) (A) (A) (A)
                 (A) (A) (A) (A)
       Virtual   (A) (A) (A) (A) (A) (A) (A) (A) (A) (A) (A) (A)
                 (A) (A) (A) (A) (A) (A) (A) (A) (A) (A) (A) (A)
                 (A) (A) (A) (A) (A) (A) (A) (A) (A) (A) (A) (A)
                 (A) (A) (A) (A) (A) (A) (A) (A) (A) (A) (A) (A)
                 (A) (A) (A) (A) (A) (A) (A) (A) (A) (A) (A) (A)
                 (A) (A) (A) (A) (A) (A) (A) (A) (A) (A) (A) (A)
                 (A) (A) (A) (A) (A) (A) (A) (A) (A) (A) (A) (A)
 The electronic state is 1-A.
 Alpha  occ. eigenvalues --  -19.18872 -19.13040 -10.30915 -10.23754  -1.12198
 Alpha  occ. eigenvalues --   -1.03802  -0.75060  -0.60785  -0.54312  -0.49586
 Alpha  occ. eigenvalues --   -0.48598  -0.43711  -0.41178  -0.37535  -0.32368
 Alpha  occ. eigenvalues --   -0.29857
 Alpha virt. eigenvalues --   -0.01230   0.04547   0.06580   0.08148   0.10027
 Alpha virt. eigenvalues --    0.11536   0.14641   0.18839   0.18929   0.22696
 Alpha virt. eigenvalues --    0.23471   0.29939   0.31539   0.34110   0.37562
 Alpha virt. eigenvalues --    0.41212   0.42897   0.43375   0.44749   0.49909
 Alpha virt. eigenvalues --    0.52142   0.53254   0.55384   0.57860   0.61461
 Alpha virt. eigenvalues --    0.66251   0.78169   0.86840   1.18546   1.20378
 Alpha virt. eigenvalues --    1.23708   1.24110   1.27453   1.27858   1.33154
 Alpha virt. eigenvalues --    1.36836   1.39463   1.43832   1.50039   1.53318
 Alpha virt. eigenvalues --    1.56603   1.70868   1.73809   1.77022   1.78601
 Alpha virt. eigenvalues --    1.86407   1.90596   1.94788   2.01194   2.09981
 Alpha virt. eigenvalues --    2.20150   2.27528   2.32841   2.33789   2.41962
 Alpha virt. eigenvalues --    2.47733   2.54918   2.58288   2.59967   2.63987
 Alpha virt. eigenvalues --    2.64293   2.66124   2.67412   2.69957   2.70013
 Alpha virt. eigenvalues --    2.89948   2.94345   2.96018   2.98414   3.06202
 Alpha virt. eigenvalues --    3.08061   3.12511   3.24044   3.24999   3.29036
 Alpha virt. eigenvalues --    3.31206   3.55634   3.82674   4.06909   4.23296
 Alpha virt. eigenvalues --   21.87248  21.99960  43.37588  43.48299
          Condensed to atoms (all electrons):
              1          2          3          4          5          6
     1  C    4.600989   0.414564   0.549728   0.264382  -0.054859  -0.009963
     2  H    0.414564   0.642860  -0.059660  -0.101188   0.009714  -0.000110
     3  O    0.549728  -0.059660   7.930551  -0.118741   0.011646   0.005382
     4  O    0.264382  -0.101188  -0.118741   8.100501   0.185085  -0.035085
     5  C   -0.054859   0.009714   0.011646   0.185085   4.822247   0.413645
     6  H   -0.009963  -0.000110   0.005382  -0.035085   0.413645   0.558448
     7  H    0.011717   0.000846   0.002746  -0.038267   0.384507  -0.028673
     8  H   -0.009964  -0.000109   0.005384  -0.035085   0.413645  -0.039245
              7          8
     1  C    0.011717  -0.009964
     2  H    0.000846  -0.000109
     3  O    0.002746   0.005384
     4  O   -0.038267  -0.035085
     5  C    0.384507   0.413645
     6  H   -0.028673  -0.039245
     7  H    0.559217  -0.028673
     8  H   -0.028673   0.558447
 Mulliken atomic charges:
              1
     1  C    0.233407
     2  H    0.093083
     3  O   -0.327036
     4  O   -0.221603
     5  C   -0.185631
     6  H    0.135600
     7  H    0.136579
     8  H    0.135600
 Sum of Mulliken charges=   0.00000
 Atomic charges with hydrogens summed into heavy atoms:
              1
     1  C    0.326490
     2  H    0.000000
     3  O   -0.327036
     4  O   -0.221603
     5  C    0.222149
     6  H    0.000000
     7  H    0.000000
     8  H    0.000000
 Sum of Mulliken charges=   0.00000
 APT atomic charges:
              1
     1  C    1.084068
     2  H   -0.007943
     3  O   -0.688111
     4  O   -0.818844
     5  C    0.438894
     6  H   -0.009683
     7  H    0.011299
     8  H   -0.009680
 Sum of APT charges=   0.00000
 APT Atomic charges with hydrogens summed into heavy atoms:
              1
     1  C    1.076125
     2  H    0.000000
     3  O   -0.688111
     4  O   -0.818844
     5  C    0.430829
     6  H    0.000000
     7  H    0.000000
     8  H    0.000000
 Sum of APT charges=   0.00000
 Electronic spatial extent (au):  <R**2>=   256.7968
 Charge=     0.0000 electrons
 Dipole moment (field-independent basis, Debye):
    X=    -1.7716    Y=     0.8087    Z=     0.0000  Tot=     1.9474
 Quadrupole moment (field-independent basis, Debye-Ang):
   XX=   -23.3548   YY=   -25.0221   ZZ=   -23.1700
   XY=     4.8799   XZ=     0.0000   YZ=     0.0000
 Traceless Quadrupole moment (field-independent basis, Debye-Ang):
   XX=     0.4941   YY=    -1.1732   ZZ=     0.6790
   XY=     4.8799   XZ=     0.0000   YZ=     0.0000
 Octapole moment (field-independent basis, Debye-Ang**2):
  XXX=    -7.1309  YYY=     1.0088  ZZZ=     0.0001  XYY=     1.1468
  XXY=     4.4831  XXZ=     0.0000  XZZ=     0.6650  YZZ=    -0.6951
  YYZ=     0.0000  XYZ=     0.0000
 Hexadecapole moment (field-independent basis, Debye-Ang**3):
 XXXX=  -206.3935 YYYY=   -83.1494 ZZZZ=   -27.8676 XXXY=     3.0000
 XXXZ=     0.0002 YYYX=     2.3791 YYYZ=     0.0001 ZZZX=    -0.0001
 ZZZY=     0.0000 XXYY=   -48.3087 XXZZ=   -40.4326 YYZZ=   -17.9619
 XXYZ=    -0.0001 YYXZ=     0.0000 ZZXY=     0.0311
 N-N= 1.220488331739D+02 E-N=-7.818848502832D+02  KE= 2.281563331916D+02
  Exact polarizability:  36.931  -0.185  31.970   0.000   0.000  23.011
 Approx polarizability:  47.020  -6.191  47.880   0.000   0.000  30.275
 Full mass-weighted force constant matrix:
 Low frequencies ---   -0.0008    0.0013    0.0014    2.2027    2.8821    5.4826
 Low frequencies ---  131.1720  298.1145  346.8100
 Diagonal vibrational polarizability:
       11.9891055       2.6441314       7.0078561
 Harmonic frequencies (cm**-1), IR intensities (KM/Mole), Raman scattering
 activities (A**4/AMU), depolarization ratios for plane and unpolarized
 incident light, reduced masses (AMU), force constants (mDyne/A),
 and normal coordinates:
                     1                      2                      3
                     A                      A                      A
 Frequencies --   131.1719               298.1145               346.8100
 Red. masses --     1.0792                 3.9390                 2.3757
 Frc consts  --     0.0109                 0.2063                 0.1684
 IR Inten    --     0.1683                14.4473                29.2826
 Atom AN      X      Y      Z        X      Y      Z        X      Y      Z
   1   6     0.00   0.00  -0.01     0.03  -0.05   0.00     0.00   0.00   0.21
   2   1     0.00   0.00  -0.05    -0.15   0.06   0.00     0.00   0.00   0.83
   3   8     0.00   0.00   0.06     0.30   0.07   0.00     0.00   0.00  -0.11
   4   8     0.00   0.00  -0.04     0.00  -0.15   0.00     0.00   0.00  -0.20
   5   6     0.00   0.00  -0.01    -0.31   0.11   0.00     0.00   0.00   0.09
   6   1     0.39  -0.31  -0.29    -0.52   0.06   0.01     0.16   0.16   0.17
   7   1     0.00   0.00   0.57    -0.18   0.42   0.00     0.00   0.00   0.19
   8   1    -0.39   0.31  -0.29    -0.52   0.06  -0.01    -0.16  -0.16   0.17
                     4                      5                      6
                     A                      A                      A
 Frequencies --   778.5088               922.8702              1038.5629
 Red. masses --     4.9899                 5.3554                 1.6541
 Frc consts  --     1.7818                 2.6874                 1.0512
 IR Inten    --     7.9576                25.3147                 0.0292
 Atom AN      X      Y      Z        X      Y      Z        X      Y      Z
   1   6     0.15   0.24   0.00     0.24   0.07   0.00     0.00   0.00   0.23
   2   1     0.16   0.24   0.00     0.51  -0.09   0.00     0.00   0.00  -0.97
   3   8    -0.27   0.11   0.00     0.01  -0.05   0.00     0.00   0.00  -0.06
   4   8     0.23  -0.25   0.00     0.05   0.30   0.00     0.00   0.00  -0.05
   5   6    -0.06  -0.09   0.00    -0.31  -0.33   0.00     0.00   0.00   0.00
   6   1    -0.40  -0.14   0.02    -0.14  -0.23   0.02    -0.02  -0.03  -0.01
   7   1     0.19   0.49   0.00    -0.32  -0.35   0.00     0.00   0.00   0.00
   8   1    -0.40  -0.14  -0.02    -0.14  -0.23  -0.02     0.02   0.03  -0.01
                     7                      8                      9
                     A                      A                      A
 Frequencies --  1173.8831              1179.5992              1227.4217
 Red. masses --     1.2763                 2.5603                 2.3443
 Frc consts  --     1.0362                 2.0990                 2.0809
 IR Inten    --     1.1300               152.1534               172.6782
 Atom AN      X      Y      Z        X      Y      Z        X      Y      Z
   1   6     0.00   0.00   0.01    -0.25  -0.08   0.00     0.16   0.03   0.00
   2   1     0.00   0.00  -0.09    -0.13  -0.14   0.00     0.21  -0.01   0.00
   3   8     0.00   0.00   0.00     0.04   0.03   0.00     0.01  -0.04   0.00
   4   8     0.00   0.00   0.06     0.13   0.12   0.00    -0.22   0.02   0.00
   5   6     0.00   0.00  -0.14     0.06  -0.16   0.00     0.16  -0.03   0.00
   6   1     0.35   0.54   0.17    -0.33  -0.07   0.12    -0.50  -0.07   0.09
   7   1     0.00   0.00   0.30     0.41   0.64   0.00     0.35   0.46   0.00
   8   1    -0.35  -0.54   0.17    -0.33  -0.07  -0.12    -0.50  -0.07  -0.09
                    10                     11                     12
                     A                      A                      A
 Frequencies --  1407.3379              1473.1501              1488.1471
 Red. masses --     1.1373                 1.1751                 1.0450
 Frc consts  --     1.3271                 1.5026                 1.3635
 IR Inten    --     1.8193                 4.0136                 9.7995
 Atom AN      X      Y      Z        X      Y      Z        X      Y      Z
   1   6    -0.05  -0.01   0.00    -0.03  -0.03   0.00     0.00   0.00   0.00
   2   1     0.81  -0.57   0.00     0.00  -0.05   0.00     0.00   0.00  -0.02
   3   8     0.00   0.07   0.00    -0.01   0.03   0.00     0.00   0.00   0.00
   4   8    -0.02  -0.04   0.00     0.05   0.02   0.00     0.00   0.00   0.01
   5   6    -0.01   0.02   0.00     0.07   0.06   0.00     0.00   0.00   0.06
   6   1     0.06   0.00  -0.02    -0.47  -0.21  -0.08     0.48  -0.02  -0.06
   7   1     0.00   0.02   0.00    -0.23  -0.62   0.00     0.00   0.00  -0.73
   8   1     0.06   0.00   0.02    -0.47  -0.21   0.08    -0.48   0.02  -0.06
                    13                     14                     15
                     A                      A                      A
 Frequencies --  1498.8040              1796.1019              3044.0223
 Red. masses --     1.0468                 8.9624                 1.0894
 Frc consts  --     1.3855                17.0349                 5.9473
 IR Inten    --    10.3475               315.3550                61.6340
 Atom AN      X      Y      Z        X      Y      Z        X      Y      Z
   1   6     0.00   0.00   0.00    -0.30   0.59   0.00    -0.04  -0.07   0.00
   2   1     0.03  -0.02   0.00     0.49   0.17   0.00     0.53   0.83   0.00
   3   8     0.00   0.01   0.00     0.18  -0.42   0.00     0.00   0.00   0.00
   4   8     0.01  -0.02   0.00     0.03  -0.04   0.00     0.00   0.00   0.00
   5   6     0.02  -0.05   0.00     0.02   0.03   0.00     0.00   0.00   0.00
   6   1    -0.13   0.53   0.40    -0.14  -0.03  -0.03    -0.01   0.05  -0.07
   7   1    -0.09  -0.26   0.00    -0.08  -0.20   0.00     0.06  -0.03   0.00
   8   1    -0.13   0.53  -0.40    -0.14  -0.03   0.03    -0.01   0.05   0.07
                    16                     17                     18
                     A                      A                      A
 Frequencies --  3057.6471              3129.9601              3167.2619
 Red. masses --     1.0314                 1.1074                 1.1061
 Frc consts  --     5.6816                 6.3917                 6.5378
 IR Inten    --    13.2079                18.5359                11.8983
 Atom AN      X      Y      Z        X      Y      Z        X      Y      Z
   1   6     0.01   0.01   0.00     0.00   0.00   0.00     0.00   0.00   0.00
   2   1    -0.07  -0.11   0.00     0.00   0.00   0.00     0.00   0.01   0.00
   3   8     0.00   0.00   0.00     0.00   0.00   0.00     0.00   0.00   0.00
   4   8     0.00   0.00   0.00     0.00   0.00   0.00     0.00   0.00   0.00
   5   6    -0.02  -0.04   0.00     0.00   0.00   0.10     0.08  -0.06   0.00
   6   1    -0.09   0.34  -0.52    -0.12   0.39  -0.57    -0.03   0.15  -0.25
   7   1     0.39  -0.17   0.00     0.00   0.00   0.02    -0.83   0.37   0.00
   8   1    -0.09   0.34   0.52     0.12  -0.39  -0.57    -0.03   0.15   0.25

 -------------------
 - Thermochemistry -
 -------------------
 Temperature   298.150 Kelvin.  Pressure   1.00000 Atm.
 Atom  1 has atomic number  6 and mass  12.00000
 Atom  2 has atomic number  1 and mass   1.00783
 Atom  3 has atomic number  8 and mass  15.99491
 Atom  4 has atomic number  8 and mass  15.99491
 Atom  5 has atomic number  6 and mass  12.00000
 Atom  6 has atomic number  1 and mass   1.00783
 Atom  7 has atomic number  1 and mass   1.00783
 Atom  8 has atomic number  1 and mass   1.00783
 Molecular mass:    60.02113 amu.
 Principal axes and moments of inertia in atomic units:
                           1         2         3
     EIGENVALUES --    89.06110 266.01128 343.71342
           X            0.99617   0.08749   0.00000
           Y           -0.08749   0.99617   0.00000
           Z            0.00000   0.00000   1.00000
 This molecule is an asymmetric top.
 Rotational symmetry number  1.
 Rotational temperatures (Kelvin)      0.97252     0.32560     0.25199
 Rotational constants (GHZ):          20.26408     6.78445     5.25072
 Zero-point vibrational energy     162449.1 (Joules/Mol)
                                   38.82628 (Kcal/Mol)
 Warning -- explicit consideration of   3 degrees of freedom as
           vibrations may cause significant error
 Vibrational temperatures:    188.73   428.92   498.98  1120.10  1327.80
          (Kelvin)           1494.26  1688.95  1697.18  1765.98  2024.84
                             2119.53  2141.11  2156.44  2584.19  4379.66
                             4399.27  4503.31  4556.98
 
 Zero-point correction=                           0.061874 (Hartree/Particle)
 Thermal correction to Energy=                    0.066412
 Thermal correction to Enthalpy=                  0.067356
 Thermal correction to Gibbs Free Energy=         0.035064
 Sum of electronic and zero-point Energies=           -229.091588
 Sum of electronic and thermal Energies=              -229.087049
 Sum of electronic and thermal Enthalpies=            -229.086105
 Sum of electronic and thermal Free Energies=         -229.118398
 
                     E (Thermal)             CV                S
                      KCal/Mol        Cal/Mol-Kelvin    Cal/Mol-Kelvin
 Total                   41.674             13.630             67.966
 Electronic               0.000              0.000              0.000
 Translational            0.889              2.981             38.196
 Rotational               0.889              2.981             23.614
 Vibrational             39.897              7.668              6.156
 Vibration  1             0.612              1.922              2.929
 Vibration  2             0.691              1.677              1.427
 Vibration  3             0.725              1.582              1.181
                       Q            Log10(Q)             Ln(Q)
 Total Bot       0.744634D-16        -16.128057        -37.136225
 Total V=0       0.214668D+13         12.331767         28.394943
 Vib (Bot)       0.126122D-27        -27.899207        -64.240299
 Vib (Bot)  1    0.155373D+01          0.191375          0.440657
 Vib (Bot)  2    0.638607D+00         -0.194766         -0.448466
 Vib (Bot)  3    0.533088D+00         -0.273201         -0.629068
 Vib (V=0)       0.363594D+01          0.560617          1.290869
 Vib (V=0)  1    0.213220D+01          0.328827          0.757153
 Vib (V=0)  2    0.131106D+01          0.117623          0.270836
 Vib (V=0)  3    0.123088D+01          0.090215          0.207728
 Electronic      0.100000D+01          0.000000          0.000000
 Translational   0.182773D+08          7.261911         16.721169
 Rotational      0.323027D+05          4.509239         10.382906
 ***** Axes restored to original set *****
 -------------------------------------------------------------------
 Center     Atomic                   Forces (Hartrees/Bohr)
 Number     Number              X              Y              Z
 -------------------------------------------------------------------
    1          6          -0.000000198   -0.000000186   -0.000000093
    2          1           0.000000057   -0.000000074    0.000000041
    3          8           0.000000025   -0.000000084   -0.000000214
    4          8           0.000000120    0.000000287   -0.000000077
    5          6          -0.000000010   -0.000000148    0.000000346
    6          1           0.000000010    0.000000061   -0.000000007
    7          1          -0.000000008    0.000000051    0.000000084
    8          1           0.000000005    0.000000093   -0.000000081
 -------------------------------------------------------------------
 Cartesian Forces:  Max     0.000000346 RMS     0.000000132

 GradGradGradGradGradGradGradGradGradGradGradGradGradGradGradGradGradGrad
 Berny optimization.
 Internal  Forces:  Max     0.000000756 RMS     0.000000194
 Search for a local minimum.
 Step number   1 out of a maximum of   2
 All quantities printed in internal units (Hartrees-Bohrs-Radians)
 Second derivative matrix not updated -- analytic derivatives used.
     Eigenvalues ---    0.00226   0.02393   0.08312   0.08478   0.12557
     Eigenvalues ---    0.14042   0.17047   0.18527   0.18653   0.23700
     Eigenvalues ---    0.26578   0.33323   0.33868   0.33888   0.34775
     Eigenvalues ---    0.36334   0.43875   0.889571000.000001000.00000
     Eigenvalues --- 1000.000001000.00000
 Angle between quadratic step and forces=  77.76 degrees.
 Linear search not attempted -- first point.
 Iteration  1 RMS(Cart)=  0.00001731 RMS(Int)=  0.00000000
 Iteration  2 RMS(Cart)=  0.00000000 RMS(Int)=  0.00000000
 Variable       Old X    -DE/DX   Delta X   Delta X   Delta X     New X
                                 (Linear)    (Quad)   (Total)
    R1        2.07410   0.00000   0.00000   0.00000   0.00000   2.07410
    R2        2.26894   0.00000   0.00000   0.00000   0.00000   2.26894
    R3        2.53176   0.00000   0.00000   0.00000   0.00000   2.53176
    R4        2.72726   0.00000   0.00000   0.00000   0.00000   2.72726
    R5        2.05905   0.00000   0.00000   0.00000   0.00000   2.05905
    R6        2.05225   0.00000   0.00000   0.00000   0.00000   2.05225
    R7        2.05905   0.00000   0.00000   0.00000   0.00000   2.05905
    A1        2.18111   0.00000   0.00000   0.00000   0.00000   2.18111
    A2        1.90436   0.00000   0.00000   0.00000   0.00000   1.90436
    A3        2.19772   0.00000   0.00000   0.00000   0.00000   2.19772
    A4        2.02597   0.00000   0.00000   0.00000   0.00000   2.02596
    A5        1.92674   0.00000   0.00000   0.00000   0.00000   1.92674
    A6        1.84116   0.00000   0.00000   0.00000   0.00000   1.84116
    A7        1.92674   0.00000   0.00000   0.00000   0.00000   1.92674
    A8        1.93124   0.00000   0.00000   0.00000   0.00000   1.93124
    A9        1.90625   0.00000   0.00000   0.00000   0.00000   1.90625
   A10        1.93124   0.00000   0.00000   0.00000   0.00000   1.93124
    D1        3.14159   0.00000   0.00000   0.00001   0.00001  -3.14159
    D2       -0.00001   0.00000   0.00000   0.00001   0.00001   0.00000
    D3        1.05473   0.00000   0.00000  -0.00004  -0.00004   1.05469
    D4       -3.14156   0.00000   0.00000  -0.00004  -0.00004  -3.14159
    D5       -1.05465   0.00000   0.00000  -0.00004  -0.00004  -1.05469
         Item               Value     Threshold  Converged?
 Maximum Force            0.000001     0.000015     YES
 RMS     Force            0.000000     0.000010     YES
 Maximum Displacement     0.000037     0.000060     YES
 RMS     Displacement     0.000017     0.000040     YES
 Predicted change in Energy=-6.255438D-12
 Optimization completed.
    -- Stationary point found.
                           ----------------------------
                           !   Optimized Parameters   !
                           ! (Angstroms and Degrees)  !
 --------------------------                            --------------------------
 ! Name  Definition              Value          Derivative Info.                !
 --------------------------------------------------------------------------------
 ! R1    R(1,2)                  1.0976         -DE/DX =    0.0                 !
 ! R2    R(1,3)                  1.2007         -DE/DX =    0.0                 !
 ! R3    R(1,4)                  1.3397         -DE/DX =    0.0                 !
 ! R4    R(4,5)                  1.4432         -DE/DX =    0.0                 !
 ! R5    R(5,6)                  1.0896         -DE/DX =    0.0                 !
 ! R6    R(5,7)                  1.086          -DE/DX =    0.0                 !
 ! R7    R(5,8)                  1.0896         -DE/DX =    0.0                 !
 ! A1    A(2,1,3)              124.9681         -DE/DX =    0.0                 !
 ! A2    A(2,1,4)              109.1119         -DE/DX =    0.0                 !
 ! A3    A(3,1,4)              125.92           -DE/DX =    0.0                 !
 ! A4    A(1,4,5)              116.0793         -DE/DX =    0.0                 !
 ! A5    A(4,5,6)              110.3942         -DE/DX =    0.0                 !
 ! A6    A(4,5,7)              105.4905         -DE/DX =    0.0                 !
 ! A7    A(4,5,8)              110.3942         -DE/DX =    0.0                 !
 ! A8    A(6,5,7)              110.6518         -DE/DX =    0.0                 !
 ! A9    A(6,5,8)              109.2202         -DE/DX =    0.0                 !
 ! A10   A(7,5,8)              110.6519         -DE/DX =    0.0                 !
 ! D1    D(2,1,4,5)           -180.0003         -DE/DX =    0.0                 !
 ! D2    D(3,1,4,5)             -0.0003         -DE/DX =    0.0                 !
 ! D3    D(1,4,5,6)             60.4315         -DE/DX =    0.0                 !
 ! D4    D(1,4,5,7)           -179.9979         -DE/DX =    0.0                 !
 ! D5    D(1,4,5,8)            -60.4272         -DE/DX =    0.0                 !
 --------------------------------------------------------------------------------
 GradGradGradGradGradGradGradGradGradGradGradGradGradGradGradGradGradGrad

 1\1\RECHENZENTRUM RWTH AACHEN-SRVMBFD\Freq\RB3LYP\TZVP\C2H4O2\JENS\29-
 Jun-2012\0\\#N Geom=AllCheck Guess=Read SCRF=Check GenChk RB3LYP/TZVP 
 Freq\\Title Card Required\\0,1\C,0.0161305004,-0.1079756777,0.03941447
 91\H,-0.0574536277,0.576480223,0.8942581593\O,0.88617182,-0.9201108337
 ,-0.1189496373\O,-1.0144971015,0.1112533031,-0.7880354547\C,-1.0650479
 51,-0.7139459524,-1.9709666511\H,-1.1372485426,-1.7661071701,-1.697149
 2029\H,-1.9535869861,-0.3962141323,-2.5085071233\H,-0.1734137129,-0.56
 17693108,-2.5784712751\\Version=AM64L-G03RevE.01\State=1-A\HF=-229.153
 4614\RMSD=2.601e-09\RMSF=1.322e-07\ZeroPoint=0.0618736\Thermal=0.06641
 23\Dipole=-0.6298662,0.2352281,-0.3673501\DipoleDeriv=1.4654171,-0.433
 5434,0.7022767,-0.6078677,0.7572482,-0.0145388,0.4640594,0.1760919,1.0
 295399,0.0566195,0.0287648,-0.0048529,0.0270141,-0.0109432,-0.1179667,
 -0.0072447,-0.1160521,-0.0695063,-0.9039967,0.2460595,-0.2529238,0.457
 2999,-0.6570144,0.1013438,0.0357371,-0.1296554,-0.5033205,-0.9219408,0
 .1162,-0.5177905,0.0912142,-0.4769831,-0.1376841,-0.5519341,-0.1103639
 ,-1.0576071,0.3041316,0.0373761,0.0544321,0.091035,0.3759977,0.2019459
 ,0.1277642,0.1432678,0.6365524,0.0733001,-0.0004457,0.0043145,-0.05311
 19,-0.0874924,-0.0268115,-0.0122529,0.0604056,-0.0148566,-0.0354379,0.
 0347511,-0.0910526,0.0549258,0.0578804,0.01448,-0.0634849,-0.0075839,0
 .0114532,-0.038093,-0.0291624,0.1055965,-0.0605094,0.0413066,-0.020768
 6,0.0073559,-0.0161099,-0.032255\Polar=31.7265464,-3.3936282,27.853304
 ,4.8932004,2.9057365,32.3326768\PG=C01 [X(C2H4O2)]\NImag=0\\0.64805106
 ,-0.33980598,0.63879373,0.03317094,0.23746738,0.55386304,-0.05302643,0
 .00431346,0.01504403,0.05717444,0.00042240,-0.14597276,-0.11511607,-0.
 02466980,0.14760834,0.00972686,-0.11086101,-0.20224855,0.00118856,0.14
 021246,0.21816010,-0.41597707,0.32717469,0.07202962,-0.00051431,0.0196
 7080,0.00391152,0.48627572,0.32093174,-0.40063124,-0.09675650,0.030929
 00,-0.01298890,-0.01192657,-0.40273640,0.41421367,0.06349868,-0.089929
 70,-0.12645290,0.01929595,-0.02423783,0.00846935,-0.05060664,0.0855975
 7,0.09091601,-0.17939678,0.03081238,-0.08524141,-0.00230285,0.00158269
 ,-0.01045675,-0.06995429,0.05448960,-0.03392499,0.32354623,0.02442065,
 -0.09592732,-0.01836993,-0.01340908,0.00726365,-0.01736013,0.05345638,
 0.00278816,0.02241882,-0.08419385,0.21800998,-0.09397616,-0.01138037,-
 0.18125933,-0.03094308,-0.00096610,-0.02592036,-0.03533705,0.02354884,
 0.02269723,0.15271832,0.09832780,0.38004933,-0.00338764,-0.01975553,-0
 .03349987,-0.00096650,0.00303317,-0.00473188,0.00012537,-0.00444341,0.
 00168204,-0.08083347,0.01784566,0.01025163,0.61342456,-0.01640031,0.00
 926798,-0.00876691,0.00406070,0.00440692,0.00069072,0.00549334,-0.0078
 2324,0.00483486,0.00535793,-0.11477219,-0.05818219,-0.01440365,0.53684
 573,-0.02891556,-0.01243541,-0.04605437,-0.00332774,-0.00043289,0.0029
 2042,0.01526089,-0.00603183,0.00148034,-0.00681288,-0.04452677,-0.1362
 0404,0.00899726,-0.08455748,0.48148723,0.00273109,-0.00322055,-0.00029
 529,-0.00000430,0.00039651,-0.00011640,-0.00055282,0.00147391,0.001148
 01,-0.00052983,-0.00113190,-0.00106917,-0.05239822,-0.01592828,0.00475
 613,0.04734958,0.00566036,-0.00190092,0.00291930,-0.00014452,0.0000855
 7,-0.00023935,-0.00189987,0.00214204,0.00080996,-0.00361186,-0.0206492
 2,-0.01112944,-0.01815743,-0.29181075,0.07257297,0.01884065,0.32053574
 ,0.00414787,-0.00393734,0.00246490,0.00065792,0.00098606,-0.00080658,-
 0.00211775,0.00140176,0.00013619,-0.00600887,-0.03848599,-0.00178689,0
 .00595584,0.08076976,-0.07322778,-0.00538293,-0.07112249,0.07860587,0.
 00034014,0.00068661,0.00108110,0.00008004,0.00005641,-0.00003784,0.000
 45414,-0.00057105,-0.00093904,0.00173817,-0.00165189,-0.00063071,-0.23
 996107,0.06890315,-0.11035085,0.00416326,-0.00087411,0.00301831,0.2512
 8075,0.00280659,-0.00410354,-0.00282479,-0.00072361,0.00020611,-0.0007
 6248,-0.00028359,0.00189775,0.00146431,-0.02176344,0.00343226,-0.01945
 347,0.07543746,-0.07779708,0.04856021,0.02543112,-0.00564575,0.0136667
 0,-0.07529002,0.07968090,0.00397858,-0.00514307,-0.00246825,-0.0011037
 0,0.00009040,-0.00089821,-0.00054620,0.00115011,0.00157357,-0.02811370
 ,0.00254067,-0.02702223,-0.10142176,0.04141419,-0.10728446,-0.00675181
 ,0.00331224,-0.00264387,0.12040943,-0.03781939,0.12710350,0.00066563,-
 0.00020508,-0.00228912,-0.00044009,-0.00049218,0.00051593,0.00014326,-
 0.00007339,-0.00015401,0.00773282,0.00466402,-0.00101377,-0.23600303,-
 0.03708287,0.12039275,-0.00075876,0.00018678,-0.00027039,-0.01809544,-
 0.00561452,0.01354915,0.24675561,0.00196456,0.00047407,0.00144752,-0.0
 0035616,-0.00060894,0.00024636,-0.00087536,0.00040176,-0.00095800,0.01
 732654,-0.00014532,-0.02076507,-0.03955627,-0.05831737,0.02685120,-0.0
 2586145,-0.00275671,0.01672154,0.00874089,0.00232936,-0.00554515,0.038
 61725,0.05862314,0.00836879,-0.00378048,0.00215546,-0.00081193,-0.0005
 3602,0.00032383,-0.00259439,0.00301663,0.00118021,0.01784028,-0.004544
 47,-0.03055372,0.11276674,0.02379704,-0.12311735,0.00771146,0.00287679
 ,-0.00274184,-0.01255040,-0.00283108,0.01163995,-0.13073054,-0.0179984
 0,0.14111346\\0.00000020,0.00000019,0.00000009,-0.00000006,0.00000007,
 -0.00000004,-0.00000002,0.00000008,0.00000021,-0.00000012,-0.00000029,
 0.00000008,0.00000001,0.00000015,-0.00000035,-0.00000001,-0.00000006,0
 .,0.,-0.00000005,-0.00000008,0.,-0.00000009,0.00000008\\\@


 HO!  SUCH BUGS AND GOBLINS IN MY LIFE!

                            -- HAMLET, ACT 5, SCENE 2
 Job cpu time:  0 days  0 hours  5 minutes 46.0 seconds.
 File lengths (MBytes):  RWF=     24 Int=      0 D2E=      0 Chk=     10 Scr=      1
 Normal termination of Gaussian 03 at Fri Jun 29 10:25:49 2012.
