# Supplementary material for: CO from CO2and fluctuating renewable energy via formic-acid derivatives
Source: Royal Society of Chemistry journal article supplement (doi:10.1039/c6gc01202g), 2016-01-01
Supplement: c6gc01202g17.log [file c6gc01202g17.log]

 Entering Gaussian System, Link 0=/opt/mbfd/GAUSSIAN/LINUX64/g03.e01/g03
 Input=MetOH_opt_freq_B3LYP_TZVP.com
 Output=MetOH_opt_freq_B3LYP_TZVP.log
 Initial command:
 /opt/mbfd/GAUSSIAN/LINUX64/g03.e01/l1.exe /tmp/gaussianscratch/Gau-24798.inp -scrdir=/tmp/gaussianscratch/
 Entering Link 1 = /opt/mbfd/GAUSSIAN/LINUX64/g03.e01/l1.exe PID=     24802.
  
 Copyright (c) 1988,1990,1992,1993,1995,1998,2003,2004,2007, Gaussian, Inc.
                  All Rights Reserved.
  
 This is the Gaussian(R) 03 program.  It is based on the
 the Gaussian(R) 98 system (copyright 1998, Gaussian, Inc.),
 the Gaussian(R) 94 system (copyright 1995, Gaussian, Inc.),
 the Gaussian 92(TM) system (copyright 1992, Gaussian, Inc.),
 the Gaussian 90(TM) system (copyright 1990, Gaussian, Inc.),
 the Gaussian 88(TM) system (copyright 1988, Gaussian, Inc.),
 the Gaussian 86(TM) system (copyright 1986, Carnegie Mellon
 University), and the Gaussian 82(TM) system (copyright 1983,
 Carnegie Mellon University). Gaussian is a federally registered
 trademark of Gaussian, Inc.
  
 This software contains proprietary and confidential information,
 including trade secrets, belonging to Gaussian, Inc.
  
 This software is provided under written license and may be
 used, copied, transmitted, or stored only in accord with that
 written license.
  
 The following legend is applicable only to US Government
 contracts under FAR:
  
                    RESTRICTED RIGHTS LEGEND
  
 Use, reproduction and disclosure by the US Government is
 subject to restrictions as set forth in subparagraphs (a)
 and (c) of the Commercial Computer Software - Restricted
 Rights clause in FAR 52.227-19.
  
 Gaussian, Inc.
 340 Quinnipiac St., Bldg. 40, Wallingford CT 06492
  
  
 ---------------------------------------------------------------
 Warning -- This program may not be used in any manner that
 competes with the business of Gaussian, Inc. or will provide
 assistance to any competitor of Gaussian, Inc.  The licensee
 of this program is prohibited from giving any competitor of
 Gaussian, Inc. access to this program.  By using this program,
 the user acknowledges that Gaussian, Inc. is engaged in the
 business of creating and licensing software in the field of
 computational chemistry and represents and warrants to the
 licensee that it is not a competitor of Gaussian, Inc. and that
 it will not use this program in any manner prohibited above.
 ---------------------------------------------------------------
  

 Cite this work as:
 Gaussian 03, Revision E.01,
 M. J. Frisch, G. W. Trucks, H. B. Schlegel, G. E. Scuseria, 
 M. A. Robb, J. R. Cheeseman, J. A. Montgomery, Jr., T. Vreven, 
 K. N. Kudin, J. C. Burant, J. M. Millam, S. S. Iyengar, J. Tomasi, 
 V. Barone, B. Mennucci, M. Cossi, G. Scalmani, N. Rega, 
 G. A. Petersson, H. Nakatsuji, M. Hada, M. Ehara, K. Toyota, 
 R. Fukuda, J. Hasegawa, M. Ishida, T. Nakajima, Y. Honda, O. Kitao, 
 H. Nakai, M. Klene, X. Li, J. E. Knox, H. P. Hratchian, J. B. Cross, 
 V. Bakken, C. Adamo, J. Jaramillo, R. Gomperts, R. E. Stratmann, 
 O. Yazyev, A. J. Austin, R. Cammi, C. Pomelli, J. W. Ochterski, 
 P. Y. Ayala, K. Morokuma, G. A. Voth, P. Salvador, J. J. Dannenberg, 
 V. G. Zakrzewski, S. Dapprich, A. D. Daniels, M. C. Strain, 
 O. Farkas, D. K. Malick, A. D. Rabuck, K. Raghavachari, 
 J. B. Foresman, J. V. Ortiz, Q. Cui, A. G. Baboul, S. Clifford, 
 J. Cioslowski, B. B. Stefanov, G. Liu, A. Liashenko, P. Piskorz, 
 I. Komaromi, R. L. Martin, D. J. Fox, T. Keith, M. A. Al-Laham, 
 C. Y. Peng, A. Nanayakkara, M. Challacombe, P. M. W. Gill, 
 B. Johnson, W. Chen, M. W. Wong, C. Gonzalez, and J. A. Pople, 
 Gaussian, Inc., Wallingford CT, 2004.
 
 ******************************************
 Gaussian 03:  AM64L-G03RevE.01 11-Sep-2007
                29-Jun-2012 
 ******************************************
 %chk=MetOH_opt_freq_B3LYP_TZVP.chk
 %mem=2000MB
 %nproc=1
 Will use up to    1 processors via shared memory.
 Default route: MaxDisk=200000000
 -----------------------------------------------------------------
 # opt=(tight,calcall) freq B3LYP TZVP int=ultrafine maxdisk=300GB
 -----------------------------------------------------------------
 1/7=10,10=4,14=-1,18=20,26=3,38=1/1,3;
 2/9=110,17=6,18=5,40=1/2;
 3/5=19,7=101,11=2,16=1,25=1,30=1,74=-5,75=5/1,2,3;
 4//1;
 5/5=2,38=5/2;
 8/6=4,10=90,11=11/1;
 11/6=1,8=1,9=11,15=111,16=1/1,2,10;
 10/6=1/2;
 6/7=2,8=2,9=2,10=2,18=1,28=1/1;
 7/10=1,25=1/1,2,3,16;
 1/10=4,14=-1,18=20/3(3);
 2/9=110/2;
 7/8=1,9=1,25=1,44=-1/16;
 99//99;
 2/9=110/2;
 3/5=19,7=101,11=2,16=1,25=1,30=1,74=-5,75=5/1,2,3;
 4/5=5,16=3/1;
 5/5=2,38=5/2;
 8/6=4,10=90,11=11/1;
 11/6=1,8=1,9=11,15=111,16=1/1,2,10;
 10/6=1/2;
 7/10=1,25=1/1,2,3,16;
 1/10=4,14=-1,18=20/3(-8);
 2/9=110/2;
 6/7=2,8=2,9=2,10=2,18=1,19=2,28=1/1;
 7/8=1,9=1,25=1,44=-1/16;
 99//99;
 -------------------
 Title Card Required
 -------------------
 Symbolic Z-matrix:
 Charge =  0 Multiplicity = 1
 C
 H                    1    B1
 H                    1    B2       2    A1
 H                    1    B3       3    A2       2    D1       0
 O                    1    B4       3    A3       4    D2       0
 H                    5    B5       1    A4       3    D3       0
       Variables:
  B1                    1.07                     
  B2                    1.07                     
  B3                    1.07                     
  B4                    1.43                     
  B5                    0.96                     
  A1                  109.47125                  
  A2                  109.47122                  
  A3                  109.4712                   
  A4                  109.5                      
  D1                  120.00001                  
  D2                  120.                       
  D3                  -60.01109                  
 
     3 tetrahedral angles replaced.

 GradGradGradGradGradGradGradGradGradGradGradGradGradGradGradGradGradGrad
 Berny optimization.
 Initialization pass.
                           ----------------------------
                           !    Initial Parameters    !
                           ! (Angstroms and Degrees)  !
 --------------------------                            --------------------------
 ! Name  Definition              Value          Derivative Info.                !
 --------------------------------------------------------------------------------
 ! R1    R(1,2)                  1.07           calculate D2E/DX2 analytically  !
 ! R2    R(1,3)                  1.07           calculate D2E/DX2 analytically  !
 ! R3    R(1,4)                  1.07           calculate D2E/DX2 analytically  !
 ! R4    R(1,5)                  1.43           calculate D2E/DX2 analytically  !
 ! R5    R(5,6)                  0.96           calculate D2E/DX2 analytically  !
 ! A1    A(2,1,3)              109.4712         calculate D2E/DX2 analytically  !
 ! A2    A(2,1,4)              109.4712         calculate D2E/DX2 analytically  !
 ! A3    A(2,1,5)              109.4712         calculate D2E/DX2 analytically  !
 ! A4    A(3,1,4)              109.4712         calculate D2E/DX2 analytically  !
 ! A5    A(3,1,5)              109.4712         calculate D2E/DX2 analytically  !
 ! A6    A(4,1,5)              109.4712         calculate D2E/DX2 analytically  !
 ! A7    A(1,5,6)              109.5            calculate D2E/DX2 analytically  !
 ! D1    D(2,1,5,6)            179.9889         calculate D2E/DX2 analytically  !
 ! D2    D(3,1,5,6)            -60.0111         calculate D2E/DX2 analytically  !
 ! D3    D(4,1,5,6)             59.9889         calculate D2E/DX2 analytically  !
 --------------------------------------------------------------------------------
 Trust Radius=3.00D-01 FncErr=1.00D-07 GrdErr=1.00D-06
 Number of steps in this run=  25 maximum allowed number of steps= 100.
 GradGradGradGradGradGradGradGradGradGradGradGradGradGradGradGradGradGrad

                          Input orientation:                          
 ---------------------------------------------------------------------
 Center     Atomic     Atomic              Coordinates (Angstroms)
 Number     Number      Type              X           Y           Z
 ---------------------------------------------------------------------
    1          6             0        0.000000    0.000000    0.000000
    2          1             0        0.000000    0.000000    1.070000
    3          1             0        1.008806    0.000000   -0.356667
    4          1             0       -0.504403    0.873651   -0.356667
    5          8             0       -0.674108   -1.167590   -0.476666
    6          1             0       -0.674501   -1.167921   -1.436666
 ---------------------------------------------------------------------
                    Distance matrix (angstroms):
                    1          2          3          4          5
     1  C    0.000000
     2  H    1.070000   0.000000
     3  H    1.070000   1.747303   0.000000
     4  H    1.070000   1.747303   1.747303   0.000000
     5  O    1.430000   2.051796   2.051796   2.051796   0.000000
     6  H    1.970533   2.846466   2.316022   2.315890   0.960000
                    6
     6  H    0.000000
 Stoichiometry    CH4O
 Framework group  C1[X(CH4O)]
 Deg. of freedom    12
 Full point group                 C1
 Largest Abelian subgroup         C1      NOp   1
 Largest concise Abelian subgroup C1      NOp   1
                         Standard orientation:                         
 ---------------------------------------------------------------------
 Center     Atomic     Atomic              Coordinates (Angstroms)
 Number     Number      Type              X           Y           Z
 ---------------------------------------------------------------------
    1          6             0        0.674962   -0.019119    0.000000
    2          1             0        1.133310    0.947740   -0.000195
    3          1             0        0.977979   -0.557305    0.873749
    4          1             0        0.977944   -0.557642   -0.873554
    5          8             0       -0.747482    0.127687    0.000000
    6          1             0       -1.159146   -0.739569    0.000000
 ---------------------------------------------------------------------
 Rotational constants (GHZ):    132.1395139     24.7235159     23.8511691
 Standard basis: TZVP (5D, 7F)
 There are    62 symmetry adapted basis functions of A   symmetry.
 Integral buffers will be    131072 words long.
 Raffenetti 2 integral format.
 Two-electron integral symmetry is turned on.
    62 basis functions,   102 primitive gaussians,    64 cartesian basis functions
     9 alpha electrons        9 beta electrons
       nuclear repulsion energy        40.4269940712 Hartrees.
 NAtoms=    6 NActive=    6 NUniq=    6 SFac= 7.50D-01 NAtFMM=   80 NAOKFM=F Big=F
 One-electron integrals computed using PRISM.
 NBasis=    62 RedAO= T  NBF=    62
 NBsUse=    62 1.00D-06 NBFU=    62
 Harris functional with IExCor=  402 diagonalized for initial guess.
 ExpMin= 9.52D-02 ExpMax= 2.70D+04 ExpMxC= 9.22D+02 IAcc=3 IRadAn=         5 AccDes= 0.00D+00
 HarFok:  IExCor= 402 AccDes= 0.00D+00 IRadAn=         5 IDoV=1
 ScaDFX=  1.000000  1.000000  1.000000  1.000000
 Initial guess orbital symmetries:
       Occupied  (A) (A) (A) (A) (A) (A) (A) (A) (A)
       Virtual   (A) (A) (A) (A) (A) (A) (A) (A) (A) (A) (A) (A)
                 (A) (A) (A) (A) (A) (A) (A) (A) (A) (A) (A) (A)
                 (A) (A) (A) (A) (A) (A) (A) (A) (A) (A) (A) (A)
                 (A) (A) (A) (A) (A) (A) (A) (A) (A) (A) (A) (A)
                 (A) (A) (A) (A) (A)
 The electronic state of the initial guess is 1-A.
 Requested convergence on RMS density matrix=1.00D-08 within 128 cycles.
 Requested convergence on MAX density matrix=1.00D-06.
 Requested convergence on             energy=1.00D-06.
 No special actions if energy rises.
 Keep R1 integrals in memory in canonical form, NReq=     4038517.
 Integral accuracy reduced to 1.0D-05 until final iterations.
 Initial convergence to 1.0D-05 achieved.  Increase integral accuracy.
 SCF Done:  E(RB+HF-LYP) =  -115.769145283     A.U. after   11 cycles
             Convg  =    0.4793D-08             -V/T =  2.0037
             S**2   =   0.0000
 Range of M.O.s used for correlation:     1    62
 NBasis=    62 NAE=     9 NBE=     9 NFC=     0 NFV=     0
 NROrb=     62 NOA=     9 NOB=     9 NVA=    53 NVB=    53

 **** Warning!!: The largest alpha MO coefficient is  0.11925546D+02

 Symmetrizing basis deriv contribution to polar:
 IMax=3 JMax=2 DiffMx= 0.00D+00
 G2DrvN: will do    7 centers at a time, making    1 passes doing MaxLOS=2.
 FoFDir/FoFCou used for L=0 through L=2.
 DoAtom=TTTTTT
          Differentiating once with respect to electric field.
                with respect to dipole field.
          Differentiating once with respect to nuclear coordinates.
          Store integrals in memory, NReq=     2984850.
          There are  21 degrees of freedom in the 1st order CPHF.
    18 vectors were produced by pass  0.
 AX will form  18 AO Fock derivatives at one time.
    18 vectors were produced by pass  1.
    18 vectors were produced by pass  2.
    18 vectors were produced by pass  3.
    18 vectors were produced by pass  4.
     7 vectors were produced by pass  5.
     3 vectors were produced by pass  6.
 Inv2:  IOpt= 1 Iter= 1 AM= 1.15D-15 Conv= 1.00D-12.
 Inverted reduced A of dimension  100 with in-core refinement.
 Isotropic polarizability for W=    0.000000       17.52 Bohr**3.
 End of Minotr Frequency-dependent properties file   721 does not exist.

 **********************************************************************

            Population analysis using the SCF density.

 **********************************************************************

 Orbital symmetries:
       Occupied  (A) (A) (A) (A) (A) (A) (A) (A) (A)
       Virtual   (A) (A) (A) (A) (A) (A) (A) (A) (A) (A) (A) (A)
                 (A) (A) (A) (A) (A) (A) (A) (A) (A) (A) (A) (A)
                 (A) (A) (A) (A) (A) (A) (A) (A) (A) (A) (A) (A)
                 (A) (A) (A) (A) (A) (A) (A) (A) (A) (A) (A) (A)
                 (A) (A) (A) (A) (A)
 The electronic state is 1-A.
 Alpha  occ. eigenvalues --  -19.12044 -10.20819  -1.01769  -0.69306  -0.51020
 Alpha  occ. eigenvalues --   -0.44926  -0.43574  -0.33869  -0.27768
 Alpha virt. eigenvalues --    0.02516   0.06891   0.11845   0.11877   0.13258
 Alpha virt. eigenvalues --    0.21404   0.21878   0.30753   0.35750   0.39543
 Alpha virt. eigenvalues --    0.45158   0.46290   0.48776   0.49902   0.52954
 Alpha virt. eigenvalues --    0.57899   0.77813   1.18102   1.22817   1.26996
 Alpha virt. eigenvalues --    1.27499   1.31108   1.45923   1.46144   1.51681
 Alpha virt. eigenvalues --    1.53173   1.76157   1.78541   1.80567   1.84874
 Alpha virt. eigenvalues --    1.95104   2.06364   2.16963   2.26150   2.37838
 Alpha virt. eigenvalues --    2.42727   2.43686   2.57075   2.61727   2.63093
 Alpha virt. eigenvalues --    2.67411   2.89624   2.95920   2.97737   3.06349
 Alpha virt. eigenvalues --    3.15525   3.20375   3.33239   3.33875   3.91570
 Alpha virt. eigenvalues --    4.31195  21.90442  43.36569
          Condensed to atoms (all electrons):
              1          2          3          4          5          6
     1  C    4.766718   0.390418   0.413285   0.413294   0.240007  -0.045460
     2  H    0.390418   0.583451  -0.035976  -0.035970  -0.041077   0.010864
     3  H    0.413285  -0.035976   0.627924  -0.054595  -0.050020  -0.007331
     4  H    0.413294  -0.035970  -0.054595   0.627912  -0.050011  -0.007337
     5  O    0.240007  -0.041077  -0.050020  -0.050011   8.028401   0.302658
     6  H   -0.045460   0.010864  -0.007331  -0.007337   0.302658   0.480094
 Mulliken atomic charges:
              1
     1  C   -0.178262
     2  H    0.128290
     3  H    0.106712
     4  H    0.106707
     5  O   -0.429957
     6  H    0.266510
 Sum of Mulliken charges=   0.00000
 Atomic charges with hydrogens summed into heavy atoms:
              1
     1  C    0.163447
     2  H    0.000000
     3  H    0.000000
     4  H    0.000000
     5  O   -0.163447
     6  H    0.000000
 Sum of Mulliken charges=   0.00000
 APT atomic charges:
              1
     1  C    0.476545
     2  H   -0.005887
     3  H   -0.060199
     4  H   -0.060194
     5  O   -0.598993
     6  H    0.248728
 Sum of APT charges=   0.00000
 APT Atomic charges with hydrogens summed into heavy atoms:
              1
     1  C    0.350265
     2  H    0.000000
     3  H    0.000000
     4  H    0.000000
     5  O   -0.350265
     6  H    0.000000
 Sum of APT charges=   0.00000
 Electronic spatial extent (au):  <R**2>=    84.2278
 Charge=     0.0000 electrons
 Dipole moment (field-independent basis, Debye):
    X=     0.9675    Y=    -1.6215    Z=     0.0000  Tot=     1.8882
 Quadrupole moment (field-independent basis, Debye-Ang):
   XX=   -12.8768   YY=   -12.3063   ZZ=   -13.8006
   XY=     2.4537   XZ=    -0.0001   YZ=     0.0000
 Traceless Quadrupole moment (field-independent basis, Debye-Ang):
   XX=     0.1177   YY=     0.6883   ZZ=    -0.8060
   XY=     2.4537   XZ=    -0.0001   YZ=     0.0000
 Octapole moment (field-independent basis, Debye-Ang**2):
  XXX=    -4.1177  YYY=    -0.6446  ZZZ=     0.0002  XYY=    -1.5443
  XXY=    -2.3402  XXZ=    -0.0001  XZZ=    -0.3207  YZZ=    -0.6994
  YYZ=    -0.0003  XYZ=    -0.0001
 Hexadecapole moment (field-independent basis, Debye-Ang**3):
 XXXX=   -61.8473 YYYY=   -20.5065 ZZZZ=   -20.0610 XXXY=     4.4383
 XXXZ=    -0.0002 YYYX=     3.0074 YYYZ=     0.0000 ZZZX=     0.0002
 ZZZY=     0.0000 XXYY=   -12.7180 XXZZ=   -14.6022 YYZZ=    -6.8471
 XXYZ=    -0.0001 YYXZ=    -0.0003 ZZXY=     0.0255
 N-N= 4.042699407124D+01 E-N=-3.525892015555D+02  KE= 1.153371388750D+02
  Exact polarizability:  18.887   1.012  17.494   0.000   0.000  16.193
 Approx polarizability:  22.611   1.314  22.106   0.000   0.000  19.588
 ***** Axes restored to original set *****
 -------------------------------------------------------------------
 Center     Atomic                   Forces (Hartrees/Bohr)
 Number     Number              X              Y              Z
 -------------------------------------------------------------------
    1          6          -0.008317998   -0.014405938   -0.015836332
    2          1          -0.002005611   -0.003473878    0.012185205
    3          1           0.017524464    0.003781928   -0.002333259
    4          1          -0.005486804    0.017067536   -0.002332448
    5          8          -0.002923628   -0.005064212    0.009740557
    6          1           0.001209577    0.002094564   -0.001423723
 -------------------------------------------------------------------
 Cartesian Forces:  Max     0.017524464 RMS     0.009076002

 GradGradGradGradGradGradGradGradGradGradGradGradGradGradGradGradGradGrad
 Berny optimization.
 Internal  Forces:  Max     0.017300001 RMS     0.008286564
 Search for a local minimum.
 Step number   1 out of a maximum of  25
 All quantities printed in internal units (Hartrees-Bohrs-Radians)
 Second derivative matrix not updated -- analytic derivatives used.
 The second derivative matrix:
                          R1        R2        R3        R4        R5
           R1           0.38291
           R2           0.00323   0.37600
           R3           0.00323   0.00414   0.37600
           R4           0.00989   0.01719   0.01718   0.33384
           R5          -0.00184   0.00009   0.00009  -0.00429   0.53316
           A1           0.00661   0.00819  -0.00516  -0.02981  -0.00015
           A2           0.00661  -0.00516   0.00819  -0.02981  -0.00015
           A3           0.00099  -0.00448  -0.00448   0.02302   0.00636
           A4          -0.00484   0.00838   0.00838  -0.02945   0.00100
           A5          -0.00468  -0.00237  -0.00456   0.03303  -0.00353
           A6          -0.00468  -0.00456  -0.00237   0.03302  -0.00353
           A7           0.00257   0.00027   0.00027   0.04720   0.01450
           D1           0.00000  -0.00556   0.00556   0.00000   0.00000
           D2           0.00583   0.00028  -0.00629  -0.00219   0.00155
           D3          -0.00583   0.00629  -0.00028   0.00219  -0.00155
                          A1        A2        A3        A4        A5
           A1           0.07184
           A2           0.00518   0.07184
           A3          -0.03672  -0.03672   0.13652
           A4           0.00475   0.00475  -0.00153   0.07236
           A5          -0.04026  -0.00480  -0.03078  -0.04017   0.14425
           A6          -0.00480  -0.04026  -0.03078  -0.04017  -0.02825
           A7          -0.00560  -0.00560   0.02037   0.00093  -0.00505
           D1          -0.01965   0.01965   0.00000   0.00000  -0.02140
           D2           0.02119   0.00058   0.01978  -0.01971  -0.00121
           D3          -0.00058  -0.02119  -0.01978   0.01971   0.02063
                          A6        A7        D1        D2        D3
           A6           0.14425
           A7          -0.00505   0.17094
           D1           0.02139   0.00000   0.02544
           D2          -0.02063   0.00253  -0.01173   0.02559
           D3           0.00121  -0.00253  -0.01174  -0.01193   0.02559
     Eigenvalues ---    0.00192   0.08769   0.08911   0.13166   0.14789
     Eigenvalues ---    0.18764   0.19958   0.35803   0.37288   0.38003
     Eigenvalues ---    0.40007   0.534051000.000001000.000001000.00000
 RFO step:  Lambda=-3.52868806D-03.
 Linear search not attempted -- first point.
 Iteration  1 RMS(Cart)=  0.03393312 RMS(Int)=  0.00098106
 Iteration  2 RMS(Cart)=  0.00061846 RMS(Int)=  0.00071590
 Iteration  3 RMS(Cart)=  0.00000121 RMS(Int)=  0.00071590
 Iteration  4 RMS(Cart)=  0.00000000 RMS(Int)=  0.00071590
 Variable       Old X    -DE/DX   Delta X   Delta X   Delta X     New X
                                 (Linear)    (Quad)   (Total)
    R1        2.02201   0.01219   0.00000   0.03375   0.03375   2.05575
    R2        2.02201   0.01730   0.00000   0.04570   0.04570   2.06771
    R3        2.02201   0.01730   0.00000   0.04570   0.04570   2.06771
    R4        2.70231   0.00046   0.00000  -0.01286  -0.01286   2.68945
    R5        1.81414   0.00142   0.00000   0.00437   0.00437   1.81851
    A1        1.91063  -0.00174   0.00000  -0.01963  -0.01938   1.89125
    A2        1.91063  -0.00174   0.00000  -0.01963  -0.01938   1.89125
    A3        1.91063  -0.00985   0.00000  -0.04646  -0.04621   1.86443
    A4        1.91063  -0.00276   0.00000  -0.00944  -0.01100   1.89963
    A5        1.91063   0.00805   0.00000   0.04758   0.04681   1.95744
    A6        1.91063   0.00805   0.00000   0.04758   0.04681   1.95744
    A7        1.91114  -0.00439   0.00000  -0.01503  -0.01503   1.89611
    D1        3.14140   0.00000   0.00000   0.00010   0.00010   3.14150
    D2       -1.04739  -0.00324   0.00000  -0.02326  -0.02465  -1.07204
    D3        1.04700   0.00324   0.00000   0.02345   0.02484   1.07185
         Item               Value     Threshold  Converged?
 Maximum Force            0.017300     0.000015     NO 
 RMS     Force            0.008287     0.000010     NO 
 Maximum Displacement     0.068832     0.000060     NO 
 RMS     Displacement     0.033889     0.000040     NO 
 Predicted change in Energy=-1.789630D-03
 GradGradGradGradGradGradGradGradGradGradGradGradGradGradGradGradGradGrad

                          Input orientation:                          
 ---------------------------------------------------------------------
 Center     Atomic     Atomic              Coordinates (Angstroms)
 Number     Number      Type              X           Y           Z
 ---------------------------------------------------------------------
    1          6             0       -0.003005   -0.005190   -0.021853
    2          1             0       -0.015513   -0.026890    1.065717
    3          1             0        1.039204    0.020145   -0.354119
    4          1             0       -0.502154    0.910076   -0.354089
    5          8             0       -0.679243   -1.176421   -0.465022
    6          1             0       -0.683496   -1.183580   -1.427301
 ---------------------------------------------------------------------
                    Distance matrix (angstroms):
                    1          2          3          4          5
     1  C    0.000000
     2  H    1.087858   0.000000
     3  H    1.094185   1.769343   0.000000
     4  H    1.094185   1.769343   1.779820   0.000000
     5  O    1.423194   2.026110   2.096934   2.096934   0.000000
     6  H    1.956261   2.828299   2.359739   2.359675   0.962314
                    6
     6  H    0.000000
 Stoichiometry    CH4O
 Framework group  C1[X(CH4O)]
 Deg. of freedom    12
 Full point group                 C1
 Largest Abelian subgroup         C1      NOp   1
 Largest concise Abelian subgroup C1      NOp   1
                         Standard orientation:                         
 ---------------------------------------------------------------------
 Center     Atomic     Atomic              Coordinates (Angstroms)
 Number     Number      Type              X           Y           Z
 ---------------------------------------------------------------------
    1          6             0        0.666679   -0.020108    0.000000
    2          1             0        1.084116    0.984473   -0.000102
    3          1             0        1.028718   -0.543696    0.889958
    4          1             0        1.028702   -0.543869   -0.889862
    5          8             0       -0.749377    0.122250    0.000000
    6          1             0       -1.146601   -0.754256    0.000002
 ---------------------------------------------------------------------
 Rotational constants (GHZ):    128.6178641     24.6922278     23.8342628
 Standard basis: TZVP (5D, 7F)
 There are    62 symmetry adapted basis functions of A   symmetry.
 Integral buffers will be    131072 words long.
 Raffenetti 2 integral format.
 Two-electron integral symmetry is turned on.
    62 basis functions,   102 primitive gaussians,    64 cartesian basis functions
     9 alpha electrons        9 beta electrons
       nuclear repulsion energy        40.2501760282 Hartrees.
 NAtoms=    6 NActive=    6 NUniq=    6 SFac= 7.50D-01 NAtFMM=   80 NAOKFM=F Big=F
 One-electron integrals computed using PRISM.
 NBasis=    62 RedAO= T  NBF=    62
 NBsUse=    62 1.00D-06 NBFU=    62
 Initial guess read from the read-write file:
 Initial guess orbital symmetries:
       Occupied  (A) (A) (A) (A) (A) (A) (A) (A) (A)
       Virtual   (A) (A) (A) (A) (A) (A) (A) (A) (A) (A) (A) (A)
                 (A) (A) (A) (A) (A) (A) (A) (A) (A) (A) (A) (A)
                 (A) (A) (A) (A) (A) (A) (A) (A) (A) (A) (A) (A)
                 (A) (A) (A) (A) (A) (A) (A) (A) (A) (A) (A) (A)
                 (A) (A) (A) (A) (A)
 Harris functional with IExCor=  402 diagonalized for initial guess.
 ExpMin= 9.52D-02 ExpMax= 2.70D+04 ExpMxC= 9.22D+02 IAcc=3 IRadAn=         5 AccDes= 0.00D+00
 HarFok:  IExCor= 402 AccDes= 0.00D+00 IRadAn=         5 IDoV=1
 ScaDFX=  1.000000  1.000000  1.000000  1.000000
 Requested convergence on RMS density matrix=1.00D-08 within 128 cycles.
 Requested convergence on MAX density matrix=1.00D-06.
 Requested convergence on             energy=1.00D-06.
 No special actions if energy rises.
 Keep R1 integrals in memory in canonical form, NReq=     4038517.
 Integral accuracy reduced to 1.0D-05 until final iterations.
 Initial convergence to 1.0D-05 achieved.  Increase integral accuracy.
 SCF Done:  E(RB+HF-LYP) =  -115.770982461     A.U. after   10 cycles
             Convg  =    0.8500D-08             -V/T =  2.0045
             S**2   =   0.0000
 Range of M.O.s used for correlation:     1    62
 NBasis=    62 NAE=     9 NBE=     9 NFC=     0 NFV=     0
 NROrb=     62 NOA=     9 NOB=     9 NVA=    53 NVB=    53

 **** Warning!!: The largest alpha MO coefficient is  0.11807023D+02

 Symmetrizing basis deriv contribution to polar:
 IMax=3 JMax=2 DiffMx= 0.00D+00
 G2DrvN: will do    7 centers at a time, making    1 passes doing MaxLOS=2.
 FoFDir/FoFCou used for L=0 through L=2.
 DoAtom=TTTTTT
          Differentiating once with respect to electric field.
                with respect to dipole field.
          Differentiating once with respect to nuclear coordinates.
          Store integrals in memory, NReq=     2984850.
          There are  21 degrees of freedom in the 1st order CPHF.
    18 vectors were produced by pass  0.
 AX will form  18 AO Fock derivatives at one time.
    18 vectors were produced by pass  1.
    18 vectors were produced by pass  2.
    18 vectors were produced by pass  3.
    18 vectors were produced by pass  4.
     7 vectors were produced by pass  5.
     3 vectors were produced by pass  6.
 Inv2:  IOpt= 1 Iter= 1 AM= 1.01D-15 Conv= 1.00D-12.
 Inverted reduced A of dimension  100 with in-core refinement.
 Isotropic polarizability for W=    0.000000       18.04 Bohr**3.
 End of Minotr Frequency-dependent properties file   721 does not exist.
 ***** Axes restored to original set *****
 -------------------------------------------------------------------
 Center     Atomic                   Forces (Hartrees/Bohr)
 Number     Number              X              Y              Z
 -------------------------------------------------------------------
    1          6          -0.000614350   -0.001064230   -0.000459983
    2          1           0.000030748    0.000052993    0.000817413
    3          1           0.001282199    0.000243948   -0.000190899
    4          1          -0.000429942    0.001232413   -0.000190605
    5          8          -0.000268222   -0.000463470    0.000105274
    6          1          -0.000000433   -0.000001653   -0.000081199
 -------------------------------------------------------------------
 Cartesian Forces:  Max     0.001282199 RMS     0.000585849

 GradGradGradGradGradGradGradGradGradGradGradGradGradGradGradGradGradGrad
 Berny optimization.
 Internal  Forces:  Max     0.001284926 RMS     0.000558799
 Search for a local minimum.
 Step number   2 out of a maximum of  25
 All quantities printed in internal units (Hartrees-Bohrs-Radians)
 Second derivative matrix not updated -- analytic derivatives used.
 Trust test= 1.03D+00 RLast= 1.20D-01 DXMaxT set to 3.59D-01
 The second derivative matrix:
                          R1        R2        R3        R4        R5
           R1           0.34480
           R2           0.00367   0.32663
           R3           0.00367   0.00465   0.32663
           R4           0.01172   0.01725   0.01725   0.33982
           R5          -0.00190  -0.00009  -0.00009  -0.00229   0.52452
           A1           0.00626   0.00814  -0.00536  -0.02842  -0.00032
           A2           0.00626  -0.00536   0.00814  -0.02842  -0.00032
           A3           0.00250  -0.00450  -0.00450   0.02980   0.00688
           A4          -0.00451   0.00840   0.00840  -0.02856   0.00125
           A5          -0.00475  -0.00197  -0.00470   0.02640  -0.00362
           A6          -0.00475  -0.00470  -0.00197   0.02640  -0.00362
           A7           0.00316   0.00031   0.00031   0.04860   0.01480
           D1           0.00000  -0.00563   0.00563   0.00000   0.00000
           D2           0.00651   0.00036  -0.00640  -0.00097   0.00188
           D3          -0.00651   0.00640  -0.00036   0.00097  -0.00188
                          A1        A2        A3        A4        A5
           A1           0.07095
           A2           0.00438   0.07095
           A3          -0.03876  -0.03876   0.13834
           A4           0.00501   0.00501  -0.00131   0.07288
           A5          -0.03584  -0.00200  -0.02955  -0.04045   0.13666
           A6          -0.00200  -0.03584  -0.02955  -0.04045  -0.03282
           A7          -0.00572  -0.00572   0.02057   0.00105  -0.00505
           D1          -0.02041   0.02040   0.00000   0.00000  -0.01883
           D2           0.02144   0.00026   0.02295  -0.01762  -0.00373
           D3          -0.00026  -0.02144  -0.02295   0.01762   0.02075
                          A6        A7        D1        D2        D3
           A6           0.13665
           A7          -0.00506   0.17657
           D1           0.01883   0.00000   0.02464
           D2          -0.02075   0.00309  -0.01090   0.02755
           D3           0.00373  -0.00309  -0.01090  -0.01389   0.02755
     Eigenvalues ---    0.00277   0.08766   0.08769   0.12988   0.15325
     Eigenvalues ---    0.18263   0.19769   0.32325   0.32648   0.34298
     Eigenvalues ---    0.38539   0.525461000.000001000.000001000.00000
 RFO step:  Lambda=-2.99457969D-06.
 Quintic linear search produced a step of  0.06095.
 Iteration  1 RMS(Cart)=  0.00200136 RMS(Int)=  0.00004565
 Iteration  2 RMS(Cart)=  0.00000228 RMS(Int)=  0.00004558
 Iteration  3 RMS(Cart)=  0.00000000 RMS(Int)=  0.00004558
 Variable       Old X    -DE/DX   Delta X   Delta X   Delta X     New X
                                 (Linear)    (Quad)   (Total)
    R1        2.05575   0.00082   0.00206   0.00034   0.00239   2.05815
    R2        2.06771   0.00128   0.00279   0.00102   0.00381   2.07152
    R3        2.06771   0.00128   0.00279   0.00102   0.00381   2.07152
    R4        2.68945   0.00050  -0.00078   0.00090   0.00011   2.68956
    R5        1.81851   0.00008   0.00027  -0.00006   0.00021   1.81872
    A1        1.89125  -0.00023  -0.00118  -0.00076  -0.00193   1.88932
    A2        1.89125  -0.00023  -0.00118  -0.00076  -0.00193   1.88932
    A3        1.86443  -0.00008  -0.00282   0.00252  -0.00028   1.86415
    A4        1.89963  -0.00022  -0.00067  -0.00038  -0.00115   1.89848
    A5        1.95744   0.00036   0.00285  -0.00031   0.00249   1.95993
    A6        1.95744   0.00036   0.00285  -0.00031   0.00249   1.95993
    A7        1.89611   0.00000  -0.00092   0.00084  -0.00007   1.89603
    D1        3.14150   0.00000   0.00001   0.00011   0.00012  -3.14157
    D2       -1.07204  -0.00013  -0.00150   0.00060  -0.00099  -1.07303
    D3        1.07185   0.00013   0.00151  -0.00037   0.00123   1.07308
         Item               Value     Threshold  Converged?
 Maximum Force            0.001285     0.000015     NO 
 RMS     Force            0.000559     0.000010     NO 
 Maximum Displacement     0.004452     0.000060     NO 
 RMS     Displacement     0.002001     0.000040     NO 
 Predicted change in Energy=-7.632215D-06
 GradGradGradGradGradGradGradGradGradGradGradGradGradGradGradGradGradGrad

                          Input orientation:                          
 ---------------------------------------------------------------------
 Center     Atomic     Atomic              Coordinates (Angstroms)
 Number     Number      Type              X           Y           Z
 ---------------------------------------------------------------------
    1          6             0       -0.003402   -0.005860   -0.022726
    2          1             0       -0.015743   -0.027315    1.066118
    3          1             0        1.041276    0.021206   -0.353737
    4          1             0       -0.502271    0.912431   -0.353670
    5          8             0       -0.679824   -1.177347   -0.465133
    6          1             0       -0.684243   -1.184974   -1.427519
 ---------------------------------------------------------------------
                    Distance matrix (angstroms):
                    1          2          3          4          5
     1  C    0.000000
     2  H    1.089124   0.000000
     3  H    1.096200   1.770771   0.000000
     4  H    1.096200   1.770771   1.782363   0.000000
     5  O    1.423254   2.026895   2.100268   2.100268   0.000000
     6  H    1.956348   2.829362   2.363323   2.363340   0.962426
                    6
     6  H    0.000000
 Stoichiometry    CH4O
 Framework group  C1[X(CH4O)]
 Deg. of freedom    12
 Full point group                 C1
 Largest Abelian subgroup         C1      NOp   1
 Largest concise Abelian subgroup C1      NOp   1
                         Standard orientation:                         
 ---------------------------------------------------------------------
 Center     Atomic     Atomic              Coordinates (Angstroms)
 Number     Number      Type              X           Y           Z
 ---------------------------------------------------------------------
    1          6             0       -0.666330   -0.020106    0.000000
    2          1             0       -1.083824    0.985822   -0.000026
    3          1             0       -1.031767   -0.543487   -0.891169
    4          1             0       -1.031771   -0.543442    0.891194
    5          8             0        0.749807    0.122049    0.000000
    6          1             0        1.146885   -0.754645    0.000001
 ---------------------------------------------------------------------
 Rotational constants (GHZ):    128.4039083     24.6666385     23.8133174
 Standard basis: TZVP (5D, 7F)
 There are    62 symmetry adapted basis functions of A   symmetry.
 Integral buffers will be    131072 words long.
 Raffenetti 2 integral format.
 Two-electron integral symmetry is turned on.
    62 basis functions,   102 primitive gaussians,    64 cartesian basis functions
     9 alpha electrons        9 beta electrons
       nuclear repulsion energy        40.2258927148 Hartrees.
 NAtoms=    6 NActive=    6 NUniq=    6 SFac= 7.50D-01 NAtFMM=   80 NAOKFM=F Big=F
 One-electron integrals computed using PRISM.
 NBasis=    62 RedAO= T  NBF=    62
 NBsUse=    62 1.00D-06 NBFU=    62
 Initial guess read from the read-write file:
 Initial guess orbital symmetries:
       Occupied  (A) (A) (A) (A) (A) (A) (A) (A) (A)
       Virtual   (A) (A) (A) (A) (A) (A) (A) (A) (A) (A) (A) (A)
                 (A) (A) (A) (A) (A) (A) (A) (A) (A) (A) (A) (A)
                 (A) (A) (A) (A) (A) (A) (A) (A) (A) (A) (A) (A)
                 (A) (A) (A) (A) (A) (A) (A) (A) (A) (A) (A) (A)
                 (A) (A) (A) (A) (A)
 Requested convergence on RMS density matrix=1.00D-08 within 128 cycles.
 Requested convergence on MAX density matrix=1.00D-06.
 Requested convergence on             energy=1.00D-06.
 No special actions if energy rises.
 Keep R1 integrals in memory in canonical form, NReq=     4038517.
 SCF Done:  E(RB+HF-LYP) =  -115.770990118     A.U. after   11 cycles
             Convg  =    0.1808D-08             -V/T =  2.0046
             S**2   =   0.0000
 Range of M.O.s used for correlation:     1    62
 NBasis=    62 NAE=     9 NBE=     9 NFC=     0 NFV=     0
 NROrb=     62 NOA=     9 NOB=     9 NVA=    53 NVB=    53

 **** Warning!!: The largest alpha MO coefficient is  0.11783302D+02

 Symmetrizing basis deriv contribution to polar:
 IMax=3 JMax=2 DiffMx= 0.00D+00
 G2DrvN: will do    7 centers at a time, making    1 passes doing MaxLOS=2.
 FoFDir/FoFCou used for L=0 through L=2.
 DoAtom=TTTTTT
          Differentiating once with respect to electric field.
                with respect to dipole field.
          Differentiating once with respect to nuclear coordinates.
          Store integrals in memory, NReq=     2984850.
          There are  21 degrees of freedom in the 1st order CPHF.
    18 vectors were produced by pass  0.
 AX will form  18 AO Fock derivatives at one time.
    18 vectors were produced by pass  1.
    18 vectors were produced by pass  2.
    18 vectors were produced by pass  3.
    18 vectors were produced by pass  4.
     7 vectors were produced by pass  5.
     3 vectors were produced by pass  6.
 Inv2:  IOpt= 1 Iter= 1 AM= 1.15D-15 Conv= 1.00D-12.
 Inverted reduced A of dimension  100 with in-core refinement.
 Isotropic polarizability for W=    0.000000       18.09 Bohr**3.
 End of Minotr Frequency-dependent properties file   721 does not exist.
 ***** Axes restored to original set *****
 -------------------------------------------------------------------
 Center     Atomic                   Forces (Hartrees/Bohr)
 Number     Number              X              Y              Z
 -------------------------------------------------------------------
    1          6          -0.000010166   -0.000017562    0.000064583
    2          1           0.000007741    0.000013475    0.000023369
    3          1           0.000038447   -0.000001190   -0.000024262
    4          1          -0.000020216    0.000032705   -0.000024320
    5          8          -0.000012205   -0.000021429   -0.000038154
    6          1          -0.000003601   -0.000005999   -0.000001216
 -------------------------------------------------------------------
 Cartesian Forces:  Max     0.000064583 RMS     0.000025411

 GradGradGradGradGradGradGradGradGradGradGradGradGradGradGradGradGradGrad
 Berny optimization.
 Internal  Forces:  Max     0.000043955 RMS     0.000023839
 Search for a local minimum.
 Step number   3 out of a maximum of  25
 All quantities printed in internal units (Hartrees-Bohrs-Radians)
 Second derivative matrix not updated -- analytic derivatives used.
 Trust test= 1.00D+00 RLast= 7.65D-03 DXMaxT set to 3.59D-01
 The second derivative matrix:
                          R1        R2        R3        R4        R5
           R1           0.34226
           R2           0.00370   0.32279
           R3           0.00370   0.00468   0.32279
           R4           0.01175   0.01724   0.01724   0.33906
           R5          -0.00190  -0.00010  -0.00010  -0.00224   0.52414
           A1           0.00626   0.00816  -0.00537  -0.02827  -0.00032
           A2           0.00626  -0.00537   0.00816  -0.02827  -0.00032
           A3           0.00252  -0.00450  -0.00450   0.02987   0.00688
           A4          -0.00450   0.00839   0.00839  -0.02843   0.00127
           A5          -0.00474  -0.00195  -0.00470   0.02603  -0.00362
           A6          -0.00474  -0.00470  -0.00195   0.02603  -0.00362
           A7           0.00318   0.00032   0.00032   0.04857   0.01480
           D1           0.00000  -0.00565   0.00565   0.00000   0.00000
           D2           0.00654   0.00037  -0.00641  -0.00091   0.00189
           D3          -0.00654   0.00641  -0.00037   0.00091  -0.00189
                          A1        A2        A3        A4        A5
           A1           0.07089
           A2           0.00432   0.07089
           A3          -0.03876  -0.03876   0.13799
           A4           0.00498   0.00498  -0.00116   0.07286
           A5          -0.03563  -0.00178  -0.02950  -0.04039   0.13600
           A6          -0.00178  -0.03563  -0.02950  -0.04039  -0.03298
           A7          -0.00572  -0.00572   0.02054   0.00106  -0.00506
           D1          -0.02043   0.02043   0.00000   0.00000  -0.01875
           D2           0.02144   0.00024   0.02303  -0.01754  -0.00378
           D3          -0.00024  -0.02144  -0.02303   0.01754   0.02072
                          A6        A7        D1        D2        D3
           A6           0.13600
           A7          -0.00505   0.17657
           D1           0.01875   0.00000   0.02465
           D2          -0.02072   0.00311  -0.01090   0.02764
           D3           0.00378  -0.00311  -0.01090  -0.01397   0.02765
     Eigenvalues ---    0.00279   0.08761   0.08765   0.12943   0.15318
     Eigenvalues ---    0.18214   0.19728   0.31941   0.32302   0.34055
     Eigenvalues ---    0.38404   0.525071000.000001000.000001000.00000
 RFO step:  Lambda=-2.64695706D-08.
 Quintic linear search produced a step of  0.01819.
 Iteration  1 RMS(Cart)=  0.00009997 RMS(Int)=  0.00000004
 Iteration  2 RMS(Cart)=  0.00000001 RMS(Int)=  0.00000004
 Variable       Old X    -DE/DX   Delta X   Delta X   Delta X     New X
                                 (Linear)    (Quad)   (Total)
    R1        2.05815   0.00002   0.00004   0.00000   0.00005   2.05819
    R2        2.07152   0.00004   0.00007   0.00006   0.00013   2.07165
    R3        2.07152   0.00004   0.00007   0.00006   0.00013   2.07165
    R4        2.68956   0.00004   0.00000   0.00011   0.00011   2.68967
    R5        1.81872   0.00000   0.00000  -0.00001   0.00000   1.81872
    A1        1.88932   0.00000  -0.00004   0.00010   0.00006   1.88939
    A2        1.88932   0.00000  -0.00004   0.00010   0.00006   1.88939
    A3        1.86415   0.00003  -0.00001   0.00018   0.00018   1.86433
    A4        1.89848   0.00000  -0.00002  -0.00006  -0.00008   1.89840
    A5        1.95993  -0.00002   0.00005  -0.00015  -0.00010   1.95983
    A6        1.95993  -0.00002   0.00005  -0.00015  -0.00010   1.95983
    A7        1.89603   0.00001   0.00000   0.00002   0.00001   1.89605
    D1       -3.14157   0.00000   0.00000  -0.00003  -0.00002  -3.14159
    D2       -1.07303   0.00001  -0.00002   0.00012   0.00011  -1.07293
    D3        1.07308  -0.00001   0.00002  -0.00018  -0.00015   1.07293
         Item               Value     Threshold  Converged?
 Maximum Force            0.000044     0.000015     NO 
 RMS     Force            0.000024     0.000010     NO 
 Maximum Displacement     0.000214     0.000060     NO 
 RMS     Displacement     0.000100     0.000040     NO 
 Predicted change in Energy=-1.570245D-08
 GradGradGradGradGradGradGradGradGradGradGradGradGradGradGradGradGradGrad

                          Input orientation:                          
 ---------------------------------------------------------------------
 Center     Atomic     Atomic              Coordinates (Angstroms)
 Number     Number      Type              X           Y           Z
 ---------------------------------------------------------------------
    1          6             0       -0.003413   -0.005882   -0.022640
    2          1             0       -0.015707   -0.027248    1.066231
    3          1             0        1.041297    0.021176   -0.353783
    4          1             0       -0.502307    0.912428   -0.353724
    5          8             0       -0.679838   -1.177388   -0.465182
    6          1             0       -0.684238   -1.184946   -1.427568
 ---------------------------------------------------------------------
                    Distance matrix (angstroms):
                    1          2          3          4          5
     1  C    0.000000
     2  H    1.089150   0.000000
     3  H    1.096270   1.770888   0.000000
     4  H    1.096270   1.770888   1.782426   0.000000
     5  O    1.423313   2.027097   2.100303   2.100303   0.000000
     6  H    1.956409   2.829529   2.363306   2.363307   0.962425
                    6
     6  H    0.000000
 Stoichiometry    CH4O
 Framework group  C1[X(CH4O)]
 Deg. of freedom    12
 Full point group                 C1
 Largest Abelian subgroup         C1      NOp   1
 Largest concise Abelian subgroup C1      NOp   1
                         Standard orientation:                         
 ---------------------------------------------------------------------
 Center     Atomic     Atomic              Coordinates (Angstroms)
 Number     Number      Type              X           Y           Z
 ---------------------------------------------------------------------
    1          6             0       -0.666360   -0.020079    0.000000
    2          1             0       -1.084029    0.985804   -0.000001
    3          1             0       -1.031713   -0.543591   -0.891213
    4          1             0       -1.031713   -0.543589    0.891214
    5          8             0        0.749838    0.122060    0.000000
    6          1             0        1.146915   -0.754634    0.000000
 ---------------------------------------------------------------------
 Rotational constants (GHZ):    128.3922348     24.6647007     23.8113634
 Standard basis: TZVP (5D, 7F)
 There are    62 symmetry adapted basis functions of A   symmetry.
 Integral buffers will be    131072 words long.
 Raffenetti 2 integral format.
 Two-electron integral symmetry is turned on.
    62 basis functions,   102 primitive gaussians,    64 cartesian basis functions
     9 alpha electrons        9 beta electrons
       nuclear repulsion energy        40.2243341286 Hartrees.
 NAtoms=    6 NActive=    6 NUniq=    6 SFac= 7.50D-01 NAtFMM=   80 NAOKFM=F Big=F
 One-electron integrals computed using PRISM.
 NBasis=    62 RedAO= T  NBF=    62
 NBsUse=    62 1.00D-06 NBFU=    62
 Initial guess read from the read-write file:
 Initial guess orbital symmetries:
       Occupied  (A) (A) (A) (A) (A) (A) (A) (A) (A)
       Virtual   (A) (A) (A) (A) (A) (A) (A) (A) (A) (A) (A) (A)
                 (A) (A) (A) (A) (A) (A) (A) (A) (A) (A) (A) (A)
                 (A) (A) (A) (A) (A) (A) (A) (A) (A) (A) (A) (A)
                 (A) (A) (A) (A) (A) (A) (A) (A) (A) (A) (A) (A)
                 (A) (A) (A) (A) (A)
 Requested convergence on RMS density matrix=1.00D-08 within 128 cycles.
 Requested convergence on MAX density matrix=1.00D-06.
 Requested convergence on             energy=1.00D-06.
 No special actions if energy rises.
 Keep R1 integrals in memory in canonical form, NReq=     4038517.
 SCF Done:  E(RB+HF-LYP) =  -115.770990133     A.U. after    5 cycles
             Convg  =    0.5337D-08             -V/T =  2.0046
             S**2   =   0.0000
 Range of M.O.s used for correlation:     1    62
 NBasis=    62 NAE=     9 NBE=     9 NFC=     0 NFV=     0
 NROrb=     62 NOA=     9 NOB=     9 NVA=    53 NVB=    53

 **** Warning!!: The largest alpha MO coefficient is  0.11781621D+02

 Symmetrizing basis deriv contribution to polar:
 IMax=3 JMax=2 DiffMx= 0.00D+00
 G2DrvN: will do    7 centers at a time, making    1 passes doing MaxLOS=2.
 FoFDir/FoFCou used for L=0 through L=2.
 DoAtom=TTTTTT
          Differentiating once with respect to electric field.
                with respect to dipole field.
          Differentiating once with respect to nuclear coordinates.
          Store integrals in memory, NReq=     2984850.
          There are  21 degrees of freedom in the 1st order CPHF.
    18 vectors were produced by pass  0.
 AX will form  18 AO Fock derivatives at one time.
    18 vectors were produced by pass  1.
    18 vectors were produced by pass  2.
    18 vectors were produced by pass  3.
    18 vectors were produced by pass  4.
     7 vectors were produced by pass  5.
     3 vectors were produced by pass  6.
 Inv2:  IOpt= 1 Iter= 1 AM= 1.24D-15 Conv= 1.00D-12.
 Inverted reduced A of dimension  100 with in-core refinement.
 Isotropic polarizability for W=    0.000000       18.09 Bohr**3.
 End of Minotr Frequency-dependent properties file   721 does not exist.
 ***** Axes restored to original set *****
 -------------------------------------------------------------------
 Center     Atomic                   Forces (Hartrees/Bohr)
 Number     Number              X              Y              Z
 -------------------------------------------------------------------
    1          6           0.000000006    0.000000014    0.000000147
    2          1          -0.000000058   -0.000000099    0.000000012
    3          1           0.000000043   -0.000000007    0.000000026
    4          1          -0.000000026    0.000000033    0.000000025
    5          8          -0.000000008   -0.000000026   -0.000000116
    6          1           0.000000043    0.000000086   -0.000000094
 -------------------------------------------------------------------
 Cartesian Forces:  Max     0.000000147 RMS     0.000000063

 GradGradGradGradGradGradGradGradGradGradGradGradGradGradGradGradGradGrad
 Berny optimization.
 Internal  Forces:  Max     0.000000050 RMS     0.000000028
 Search for a local minimum.
 Step number   4 out of a maximum of  25
 All quantities printed in internal units (Hartrees-Bohrs-Radians)
 Second derivative matrix not updated -- analytic derivatives used.
 Trust test= 9.95D-01 RLast= 3.91D-04 DXMaxT set to 3.59D-01
 The second derivative matrix:
                          R1        R2        R3        R4        R5
           R1           0.34221
           R2           0.00370   0.32265
           R3           0.00370   0.00469   0.32265
           R4           0.01174   0.01724   0.01724   0.33893
           R5          -0.00190  -0.00010  -0.00010  -0.00225   0.52414
           A1           0.00626   0.00816  -0.00537  -0.02827  -0.00032
           A2           0.00626  -0.00537   0.00816  -0.02827  -0.00032
           A3           0.00252  -0.00450  -0.00450   0.02984   0.00688
           A4          -0.00450   0.00839   0.00839  -0.02842   0.00127
           A5          -0.00474  -0.00195  -0.00470   0.02605  -0.00362
           A6          -0.00474  -0.00470  -0.00195   0.02605  -0.00362
           A7           0.00317   0.00032   0.00032   0.04857   0.01480
           D1           0.00000  -0.00565   0.00565   0.00000   0.00000
           D2           0.00654   0.00037  -0.00641  -0.00091   0.00189
           D3          -0.00654   0.00641  -0.00037   0.00091  -0.00189
                          A1        A2        A3        A4        A5
           A1           0.07088
           A2           0.00432   0.07088
           A3          -0.03875  -0.03875   0.13796
           A4           0.00497   0.00497  -0.00116   0.07285
           A5          -0.03564  -0.00178  -0.02950  -0.04038   0.13601
           A6          -0.00178  -0.03564  -0.02950  -0.04038  -0.03296
           A7          -0.00572  -0.00572   0.02054   0.00106  -0.00506
           D1          -0.02042   0.02042   0.00000   0.00000  -0.01875
           D2           0.02143   0.00024   0.02301  -0.01755  -0.00377
           D3          -0.00024  -0.02143  -0.02301   0.01755   0.02072
                          A6        A7        D1        D2        D3
           A6           0.13601
           A7          -0.00506   0.17655
           D1           0.01875   0.00000   0.02466
           D2          -0.02072   0.00311  -0.01090   0.02764
           D3           0.00377  -0.00311  -0.01090  -0.01396   0.02764
     Eigenvalues ---    0.00279   0.08761   0.08764   0.12941   0.15315
     Eigenvalues ---    0.18213   0.19726   0.31927   0.32290   0.34050
     Eigenvalues ---    0.38392   0.525081000.000001000.000001000.00000
 RFO step:  Lambda= 0.00000000D+00.
 Quintic linear search produced a step of  0.00111.
 Iteration  1 RMS(Cart)=  0.00000035 RMS(Int)=  0.00000000
 Variable       Old X    -DE/DX   Delta X   Delta X   Delta X     New X
                                 (Linear)    (Quad)   (Total)
    R1        2.05819   0.00000   0.00000   0.00000   0.00000   2.05819
    R2        2.07165   0.00000   0.00000   0.00000   0.00000   2.07165
    R3        2.07165   0.00000   0.00000   0.00000   0.00000   2.07165
    R4        2.68967   0.00000   0.00000   0.00000   0.00000   2.68967
    R5        1.81872   0.00000   0.00000   0.00000   0.00000   1.81872
    A1        1.88939   0.00000   0.00000   0.00000   0.00000   1.88939
    A2        1.88939   0.00000   0.00000   0.00000   0.00000   1.88939
    A3        1.86433   0.00000   0.00000   0.00000   0.00000   1.86433
    A4        1.89840   0.00000   0.00000   0.00000   0.00000   1.89840
    A5        1.95983   0.00000   0.00000   0.00000   0.00000   1.95983
    A6        1.95983   0.00000   0.00000   0.00000   0.00000   1.95983
    A7        1.89605   0.00000   0.00000   0.00000   0.00000   1.89605
    D1       -3.14159   0.00000   0.00000   0.00000   0.00000  -3.14159
    D2       -1.07293   0.00000   0.00000   0.00000   0.00000  -1.07293
    D3        1.07293   0.00000   0.00000   0.00000   0.00000   1.07293
         Item               Value     Threshold  Converged?
 Maximum Force            0.000000     0.000015     YES
 RMS     Force            0.000000     0.000010     YES
 Maximum Displacement     0.000001     0.000060     YES
 RMS     Displacement     0.000000     0.000040     YES
 Predicted change in Energy=-3.681768D-14
 Optimization completed.
    -- Stationary point found.
                           ----------------------------
                           !   Optimized Parameters   !
                           ! (Angstroms and Degrees)  !
 --------------------------                            --------------------------
 ! Name  Definition              Value          Derivative Info.                !
 --------------------------------------------------------------------------------
 ! R1    R(1,2)                  1.0891         -DE/DX =    0.0                 !
 ! R2    R(1,3)                  1.0963         -DE/DX =    0.0                 !
 ! R3    R(1,4)                  1.0963         -DE/DX =    0.0                 !
 ! R4    R(1,5)                  1.4233         -DE/DX =    0.0                 !
 ! R5    R(5,6)                  0.9624         -DE/DX =    0.0                 !
 ! A1    A(2,1,3)              108.2539         -DE/DX =    0.0                 !
 ! A2    A(2,1,4)              108.2539         -DE/DX =    0.0                 !
 ! A3    A(2,1,5)              106.8181         -DE/DX =    0.0                 !
 ! A4    A(3,1,4)              108.7705         -DE/DX =    0.0                 !
 ! A5    A(3,1,5)              112.2898         -DE/DX =    0.0                 !
 ! A6    A(4,1,5)              112.2898         -DE/DX =    0.0                 !
 ! A7    A(1,5,6)              108.6356         -DE/DX =    0.0                 !
 ! D1    D(2,1,5,6)           -179.9999         -DE/DX =    0.0                 !
 ! D2    D(3,1,5,6)            -61.4742         -DE/DX =    0.0                 !
 ! D3    D(4,1,5,6)             61.4743         -DE/DX =    0.0                 !
 --------------------------------------------------------------------------------
 GradGradGradGradGradGradGradGradGradGradGradGradGradGradGradGradGradGrad

                          Input orientation:                          
 ---------------------------------------------------------------------
 Center     Atomic     Atomic              Coordinates (Angstroms)
 Number     Number      Type              X           Y           Z
 ---------------------------------------------------------------------
    1          6             0       -0.003413   -0.005882   -0.022640
    2          1             0       -0.015707   -0.027248    1.066231
    3          1             0        1.041297    0.021176   -0.353783
    4          1             0       -0.502307    0.912428   -0.353724
    5          8             0       -0.679838   -1.177388   -0.465182
    6          1             0       -0.684238   -1.184946   -1.427568
 ---------------------------------------------------------------------
                    Distance matrix (angstroms):
                    1          2          3          4          5
     1  C    0.000000
     2  H    1.089150   0.000000
     3  H    1.096270   1.770888   0.000000
     4  H    1.096270   1.770888   1.782426   0.000000
     5  O    1.423313   2.027097   2.100303   2.100303   0.000000
     6  H    1.956409   2.829529   2.363306   2.363307   0.962425
                    6
     6  H    0.000000
 Stoichiometry    CH4O
 Framework group  C1[X(CH4O)]
 Deg. of freedom    12
 Full point group                 C1
 Largest Abelian subgroup         C1      NOp   1
 Largest concise Abelian subgroup C1      NOp   1
                         Standard orientation:                         
 ---------------------------------------------------------------------
 Center     Atomic     Atomic              Coordinates (Angstroms)
 Number     Number      Type              X           Y           Z
 ---------------------------------------------------------------------
    1          6             0       -0.666360   -0.020079    0.000000
    2          1             0       -1.084029    0.985804   -0.000001
    3          1             0       -1.031713   -0.543591   -0.891213
    4          1             0       -1.031713   -0.543589    0.891214
    5          8             0        0.749838    0.122060    0.000000
    6          1             0        1.146915   -0.754634    0.000000
 ---------------------------------------------------------------------
 Rotational constants (GHZ):    128.3922348     24.6647007     23.8113634

 **********************************************************************

            Population analysis using the SCF density.

 **********************************************************************

 Orbital symmetries:
       Occupied  (A) (A) (A) (A) (A) (A) (A) (A) (A)
       Virtual   (A) (A) (A) (A) (A) (A) (A) (A) (A) (A) (A) (A)
                 (A) (A) (A) (A) (A) (A) (A) (A) (A) (A) (A) (A)
                 (A) (A) (A) (A) (A) (A) (A) (A) (A) (A) (A) (A)
                 (A) (A) (A) (A) (A) (A) (A) (A) (A) (A) (A) (A)
                 (A) (A) (A) (A) (A)
 The electronic state is 1-A.
 Alpha  occ. eigenvalues --  -19.12510 -10.21496  -1.02177  -0.68769  -0.51236
 Alpha  occ. eigenvalues --   -0.44397  -0.43015  -0.34113  -0.28029
 Alpha virt. eigenvalues --    0.02462   0.06587   0.11355   0.11635   0.13458
 Alpha virt. eigenvalues --    0.21204   0.22364   0.30749   0.36188   0.39515
 Alpha virt. eigenvalues --    0.44250   0.45880   0.47528   0.49988   0.51155
 Alpha virt. eigenvalues --    0.57822   0.77949   1.17751   1.22696   1.26794
 Alpha virt. eigenvalues --    1.28035   1.30069   1.45183   1.46727   1.51850
 Alpha virt. eigenvalues --    1.52296   1.75147   1.77108   1.78059   1.83638
 Alpha virt. eigenvalues --    1.95845   2.05392   2.16227   2.24346   2.35937
 Alpha virt. eigenvalues --    2.40561   2.42394   2.54441   2.59716   2.63050
 Alpha virt. eigenvalues --    2.66083   2.88143   2.95715   2.96516   3.06266
 Alpha virt. eigenvalues --    3.13081   3.20493   3.28608   3.30899   3.91282
 Alpha virt. eigenvalues --    4.30304  21.85406  43.35831
          Condensed to atoms (all electrons):
              1          2          3          4          5          6
     1  C    4.776554   0.394957   0.402776   0.402776   0.246525  -0.045025
     2  H    0.394957   0.586533  -0.036337  -0.036337  -0.046280   0.011213
     3  H    0.402776  -0.036337   0.643080  -0.056333  -0.046950  -0.007724
     4  H    0.402776  -0.036337  -0.056333   0.643081  -0.046950  -0.007724
     5  O    0.246525  -0.046280  -0.046950  -0.046950   8.010141   0.300324
     6  H   -0.045025   0.011213  -0.007724  -0.007724   0.300324   0.482788
 Mulliken atomic charges:
              1
     1  C   -0.178564
     2  H    0.126251
     3  H    0.101488
     4  H    0.101488
     5  O   -0.416810
     6  H    0.266147
 Sum of Mulliken charges=   0.00000
 Atomic charges with hydrogens summed into heavy atoms:
              1
     1  C    0.150663
     2  H    0.000000
     3  H    0.000000
     4  H    0.000000
     5  O   -0.150663
     6  H    0.000000
 Sum of Mulliken charges=   0.00000
 APT atomic charges:
              1
     1  C    0.505275
     2  H   -0.014412
     3  H   -0.070535
     4  H   -0.070535
     5  O   -0.597786
     6  H    0.247993
 Sum of APT charges=   0.00000
 APT Atomic charges with hydrogens summed into heavy atoms:
              1
     1  C    0.349794
     2  H    0.000000
     3  H    0.000000
     4  H    0.000000
     5  O   -0.349794
     6  H    0.000000
 Sum of APT charges=   0.00000
 Electronic spatial extent (au):  <R**2>=    84.9477
 Charge=     0.0000 electrons
 Dipole moment (field-independent basis, Debye):
    X=    -0.9062    Y=    -1.5978    Z=     0.0000  Tot=     1.8369
 Quadrupole moment (field-independent basis, Debye-Ang):
   XX=   -12.9856   YY=   -12.3403   ZZ=   -13.8861
   XY=    -2.3680   XZ=     0.0000   YZ=     0.0000
 Traceless Quadrupole moment (field-independent basis, Debye-Ang):
   XX=     0.0851   YY=     0.7304   ZZ=    -0.8154
   XY=    -2.3680   XZ=     0.0000   YZ=     0.0000
 Octapole moment (field-independent basis, Debye-Ang**2):
  XXX=     4.3166  YYY=    -0.5707  ZZZ=     0.0000  XYY=     1.7349
  XXY=    -2.4262  XXZ=     0.0000  XZZ=     0.3722  YZZ=    -0.6730
  YYZ=     0.0000  XYZ=     0.0000
 Hexadecapole moment (field-independent basis, Debye-Ang**3):
 XXXX=   -62.7450 YYYY=   -20.9053 ZZZZ=   -20.7431 XXXY=    -4.1009
 XXXZ=     0.0000 YYYX=    -3.0805 YYYZ=     0.0000 ZZZX=     0.0000
 ZZZY=     0.0000 XXYY=   -12.9501 XXZZ=   -14.6777 YYZZ=    -7.0935
 XXYZ=     0.0000 YYXZ=     0.0000 ZZXY=     0.0203
 N-N= 4.022433412862D+01 E-N=-3.520946618773D+02  KE= 1.152425081471D+02
  Exact polarizability:  19.346  -0.690  18.095   0.000   0.000  16.818
 Approx polarizability:  23.266  -0.782  22.967   0.000   0.000  20.377
 Rotating derivatives to standard orientation.
 Full mass-weighted force constant matrix:
 Low frequencies ---   -0.0006    0.0002    0.0006    1.8107    4.2841    5.5218
 Low frequencies ---  316.5936 1038.5872 1075.7387
 Diagonal vibrational polarizability:
        3.6322267       0.2373899      36.5326975
 Harmonic frequencies (cm**-1), IR intensities (KM/Mole), Raman scattering
 activities (A**4/AMU), depolarization ratios for plane and unpolarized
 incident light, reduced masses (AMU), force constants (mDyne/A),
 and normal coordinates:
                     1                      2                      3
                     A                      A                      A
 Frequencies --   316.5931              1038.5872              1075.7387
 Red. masses --     1.0710                 3.7331                 1.2712
 Frc consts  --     0.0633                 2.3725                 0.8667
 IR Inten    --   135.1940               122.7825                 2.6242
 Atom AN      X      Y      Z        X      Y      Z        X      Y      Z
   1   6     0.00   0.00   0.00     0.33  -0.02   0.00    -0.11  -0.08   0.00
   2   1     0.00   0.00   0.29     0.65   0.12   0.00     0.46   0.15   0.00
   3   1    -0.06   0.22  -0.10    -0.01   0.19  -0.02    -0.36   0.18  -0.05
   4   1     0.06  -0.22  -0.10    -0.01   0.19   0.02    -0.36   0.18   0.05
   5   8     0.00   0.00  -0.06    -0.32  -0.03   0.00     0.06   0.01   0.00
   6   1     0.00   0.00   0.89     0.42   0.32   0.00     0.59   0.25   0.00
                     4                      5                      6
                     A                      A                      A
 Frequencies --  1169.5649              1362.4027              1488.1949
 Red. masses --     1.2668                 1.2966                 1.1193
 Frc consts  --     1.0210                 1.4179                 1.4606
 IR Inten    --     0.2392                21.0623                 5.9979
 Atom AN      X      Y      Z        X      Y      Z        X      Y      Z
   1   6     0.00   0.00   0.14    -0.04   0.12   0.00    -0.10   0.01   0.00
   2   1     0.00   0.00  -0.27    -0.41  -0.03   0.00     0.63   0.29   0.00
   3   1     0.63   0.12  -0.19     0.18  -0.20   0.11     0.42  -0.27  -0.03
   4   1    -0.63  -0.12  -0.19     0.18  -0.20  -0.11     0.42  -0.27   0.03
   5   8     0.00   0.00  -0.06    -0.02  -0.08   0.00    -0.02   0.01   0.00
   6   1     0.00   0.00  -0.01     0.75   0.28   0.00    -0.05  -0.01   0.00
                     7                      8                      9
                     A                      A                      A
 Frequencies --  1491.5861              1507.0039              2989.8891
 Red. masses --     1.0481                 1.0540                 1.0368
 Frc consts  --     1.3738                 1.4103                 5.4608
 IR Inten    --     2.1677                 4.5380                62.9190
 Atom AN      X      Y      Z        X      Y      Z        X      Y      Z
   1   6     0.00   0.00  -0.06     0.04   0.04   0.00    -0.04  -0.03   0.00
   2   1     0.00   0.00   0.73     0.17   0.08   0.00     0.09  -0.24   0.00
   3   1     0.31  -0.37   0.06    -0.36  -0.43   0.41     0.21   0.32   0.56
   4   1    -0.31   0.37   0.06    -0.36  -0.43  -0.41     0.21   0.32  -0.56
   5   8     0.00   0.00  -0.01     0.01   0.02   0.00     0.00   0.00   0.00
   6   1     0.00   0.00  -0.01    -0.10  -0.03   0.00     0.00   0.00   0.00
                    10                     11                     12
                     A                      A                      A
 Frequencies --  3034.6323              3115.6041              3820.4226
 Red. masses --     1.1055                 1.0963                 1.0666
 Frc consts  --     5.9982                 6.2702                 9.1726
 IR Inten    --    69.5906                29.1543                23.3590
 Atom AN      X      Y      Z        X      Y      Z        X      Y      Z
   1   6     0.00   0.00   0.09     0.02  -0.09   0.00     0.00   0.00   0.00
   2   1     0.00   0.00   0.03    -0.36   0.90   0.00     0.00   0.01   0.00
   3   1    -0.22  -0.35  -0.57     0.05   0.07   0.15     0.00   0.00   0.00
   4   1     0.22   0.35  -0.57     0.05   0.07  -0.15     0.00   0.00   0.00
   5   8     0.00   0.00   0.00     0.00   0.00   0.00     0.03  -0.06   0.00
   6   1     0.00   0.00   0.00     0.00  -0.02   0.00    -0.42   0.90   0.00

 -------------------
 - Thermochemistry -
 -------------------
 Temperature   298.150 Kelvin.  Pressure   1.00000 Atm.
 Atom  1 has atomic number  6 and mass  12.00000
 Atom  2 has atomic number  1 and mass   1.00783
 Atom  3 has atomic number  1 and mass   1.00783
 Atom  4 has atomic number  1 and mass   1.00783
 Atom  5 has atomic number  8 and mass  15.99491
 Atom  6 has atomic number  1 and mass   1.00783
 Molecular mass:    32.02621 amu.
 Principal axes and moments of inertia in atomic units:
                           1         2         3
     EIGENVALUES --    14.05647  73.17102  75.79327
           X            0.99896  -0.04555   0.00000
           Y            0.04555   0.99896   0.00000
           Z            0.00000   0.00000   1.00000
 This molecule is an asymmetric top.
 Rotational symmetry number  1.
 Rotational temperatures (Kelvin)      6.16185     1.18372     1.14276
 Rotational constants (GHZ):         128.39223    24.66470    23.81136
 Zero-point vibrational energy     134042.9 (Joules/Mol)
                                   32.03702 (Kcal/Mol)
 Warning -- explicit consideration of   1 degrees of freedom as
           vibrations may cause significant error
 Vibrational temperatures:    455.51  1494.29  1547.75  1682.74  1960.19
          (Kelvin)           2141.18  2146.06  2168.24  4301.78  4366.15
                             4482.65  5496.73
 
 Zero-point correction=                           0.051054 (Hartree/Particle)
 Thermal correction to Energy=                    0.054388
 Thermal correction to Enthalpy=                  0.055333
 Thermal correction to Gibbs Free Energy=         0.028298
 Sum of electronic and zero-point Energies=           -115.719936
 Sum of electronic and thermal Energies=              -115.716602
 Sum of electronic and thermal Enthalpies=            -115.715658
 Sum of electronic and thermal Free Energies=         -115.742692
 
                     E (Thermal)             CV                S
                      KCal/Mol        Cal/Mol-Kelvin    Cal/Mol-Kelvin
 Total                   34.129              8.816             56.899
 Electronic               0.000              0.000              0.000
 Translational            0.889              2.981             36.324
 Rotational               0.889              2.981             18.995
 Vibrational             32.352              2.855              1.580
 Vibration  1             0.703              1.642              1.328
                       Q            Log10(Q)             Ln(Q)
 Total Bot       0.963586D-13        -13.016110        -29.970700
 Total V=0       0.293197D+11         10.467160         24.101527
 Vib (Bot)       0.427964D-23        -23.368593        -53.808173
 Vib (Bot)  1    0.594971D+00         -0.225504         -0.519243
 Vib (V=0)       0.130220D+01          0.114677          0.264054
 Vib (V=0)  1    0.127717D+01          0.106248          0.244645
 Electronic      0.100000D+01          0.000000          0.000000
 Translational   0.712383D+07          6.852714         15.778956
 Rotational      0.316060D+04          3.499769          8.058517
 ***** Axes restored to original set *****
 -------------------------------------------------------------------
 Center     Atomic                   Forces (Hartrees/Bohr)
 Number     Number              X              Y              Z
 -------------------------------------------------------------------
    1          6           0.000000006    0.000000014    0.000000147
    2          1          -0.000000058   -0.000000099    0.000000012
    3          1           0.000000043   -0.000000007    0.000000026
    4          1          -0.000000026    0.000000033    0.000000025
    5          8          -0.000000008   -0.000000026   -0.000000116
    6          1           0.000000043    0.000000086   -0.000000094
 -------------------------------------------------------------------
 Cartesian Forces:  Max     0.000000147 RMS     0.000000063
 Final structure in terms of initial Z-matrix:
 C
 H,1,B1
 H,1,B2,2,A1
 H,1,B3,3,A2,2,D1,0
 O,1,B4,3,A3,4,D2,0
 H,5,B5,1,A4,3,D3,0
      Variables:
 B1=1.08914982
 B2=1.09626957
 B3=1.09626958
 B4=1.42331343
 B5=0.96242522
 A1=108.25385464
 A2=108.77048105
 A3=112.28984055
 A4=108.63556557
 D1=117.41577778
 D2=124.90814967
 D3=-61.47418941
 1\1\RECHENZENTRUM RWTH AACHEN-SRVMBFD\Freq\RB3LYP\TZVP\C1H4O1\JENS\29-
 Jun-2012\0\\# opt=(tight,calcall) freq B3LYP TZVP int=ultrafine maxdis
 k=300GB\\Title Card Required\\0,1\C,-0.0034129784,-0.005882425,-0.0226
 397464\H,-0.0157070631,-0.0272478243,1.0662310965\H,1.0412968966,0.021
 1764806,-0.3537832998\H,-0.5023072933,0.9124284006,-0.3537238415\O,-0.
 6798383923,-1.177388187,-0.4651824412\H,-0.6842380461,-1.1849459892,-1
 .4275679336\\Version=AM64L-G03RevE.01\State=1-A\HF=-115.7709901\RMSD=5
 .337e-09\RMSF=6.339e-08\ZeroPoint=0.0510542\Thermal=0.0543884\Dipole=0
 .2901231,0.502506,-0.4308316\DipoleDeriv=0.4950136,0.1676864,0.074412,
 0.1676841,0.6886038,0.1288822,0.1076525,0.1864531,0.332209,0.0597794,-
 0.0184991,0.0094859,-0.0184977,0.038422,0.0164432,-0.0127179,-0.022012
 6,-0.1414388,-0.2167885,-0.0580238,0.0439423,-0.0284313,-0.0151796,-0.
 0369049,0.0723875,-0.0086834,0.0203645,-0.0281447,0.0804781,-0.0539253
 ,0.050883,-0.2038317,0.019595,-0.0437063,0.0583378,0.0203727,-0.652943
 6,-0.1109541,-0.1061102,-0.1109517,-0.7810276,-0.1837924,-0.1397854,-0
 .2421162,-0.3593881,0.3430838,-0.0606874,0.0321953,-0.0606864,0.273013
 2,0.055777,0.0161697,0.0280213,0.1278807\Polar=17.2715069,0.7853443,18
 .1781708,0.4634209,0.8024933,18.8098683\PG=C01 [X(C1H4O1)]\NImag=0\\0.
 53138112,-0.03851177,0.48691935,-0.01723702,-0.02985610,0.59127955,-0.
 05013866,0.00090919,0.01340470,0.05026586,0.00090961,-0.04909026,0.023
 23392,0.00631179,0.05755390,0.00701492,0.01216714,-0.31499785,-0.00413
 228,-0.00717661,0.34198172,-0.26785369,0.00743298,0.07565138,0.0005181
 7,0.00129163,0.00107986,0.29611867,0.00976922,-0.05085977,-0.00332753,
 -0.00163016,0.00129968,0.00168540,0.00367082,0.05733128,0.07684212,-0.
 00053775,-0.08002721,0.03077360,-0.00137130,-0.00849759,-0.08101701,0.
 00415957,0.07613253,-0.11255176,0.09943027,-0.04069901,0.00125001,-0.0
 0120569,0.00091916,-0.01390410,0.02463615,-0.01062214,0.11384401,0.097
 09384,-0.20617062,0.06384447,0.00171529,0.00056601,0.00177805,0.002581
 26,0.00180838,0.00134872,-0.10156165,0.23961557,-0.03887832,0.06627034
 ,-0.08001827,-0.01657358,0.02596627,-0.00849577,0.00647984,-0.00852653
 ,0.00480145,0.04410181,-0.06807388,0.07612289,-0.09839136,-0.06672223,
 -0.00817934,-0.00048067,-0.00404747,-0.00393755,-0.01498291,-0.0369419
 5,-0.01474989,0.01071499,0.00020913,0.00378164,0.11555310,-0.06672080,
 -0.17542280,-0.01416338,-0.00404629,-0.00515110,-0.00681874,-0.0146253
 9,-0.01049070,-0.00414805,-0.02210831,-0.03618758,-0.01484813,0.124125
 99,0.25885987,-0.03052655,-0.05286758,-0.10379036,-0.02173074,-0.03763
 566,-0.01182737,-0.00263615,0.00440256,0.00639777,0.00512981,-0.000083
 39,0.00639677,0.03196289,0.05532102,0.61855284,-0.00244565,-0.00253844
 ,-0.02294070,-0.00141473,-0.00325988,-0.00094411,0.00010386,0.00049592
 ,-0.00122669,0.00064684,-0.00003787,0.00108862,-0.01241314,-0.01662520
 ,0.01780073,0.01552282,-0.00254010,-0.00537590,-0.03973137,-0.00325982
 ,-0.00517823,-0.00163523,-0.00035129,0.00091113,0.00054882,0.00080922,
 0.00036824,-0.00078806,-0.01662348,-0.03160769,0.03086305,0.02196547,0
 .04088245,0.00278484,0.00482395,-0.01244585,-0.00174169,-0.00301661,0.
 00183686,0.00044208,0.00160653,0.00119306,0.00117037,0.00118603,0.0011
 9293,-0.00887776,-0.01534270,-0.51572965,0.00622215,0.01074280,0.52395
 265\\0.,-0.00000001,-0.00000015,0.00000006,0.00000010,-0.00000001,-0.0
 0000004,0.,-0.00000003,0.00000003,-0.00000003,-0.00000002,0.,0.0000000
 3,0.00000012,-0.00000004,-0.00000009,0.00000009\\\@


 WE LOSE BECAUSE WE WIN

 GAMBLERS,

 RECOLLECTING WHICH,

 TOSS THEIR DICE AGAIN....


                          EMILY DICKINSON  BOLTS OF MELODY NO. 533
 Job cpu time:  0 days  0 hours  7 minutes 46.3 seconds.
 File lengths (MBytes):  RWF=     18 Int=      0 D2E=      0 Chk=     10 Scr=      1
 Normal termination of Gaussian 03 at Fri Jun 29 09:40:03 2012.
 Link1:  Proceeding to internal job step number  2.
 --------------------------------------------------------------
 #N Geom=AllCheck Guess=Read SCRF=Check GenChk RB3LYP/TZVP Freq
 --------------------------------------------------------------
 1/7=10,10=4,29=7,30=1,38=1,40=1,46=1/1,3;
 2/40=1/2;
 3/5=19,7=101,11=2,16=1,25=1,30=1,70=2,71=2,74=-5,75=5/1,2,3;
 4/5=1,7=1/1;
 5/5=2,38=6/2;
 8/6=4,10=90,11=11/1;
 11/6=1,8=1,9=11,15=111,16=1/1,2,10;
 10/6=1/2;
 6/7=2,8=2,9=2,10=2,18=1,28=1/1;
 7/8=1,10=1,25=1/1,2,3,16;
 1/10=4,30=1,46=1/3;
 99//99;
 -------------------
 Title Card Required
 -------------------
 Redundant internal coordinates taken from checkpoint file:
 MetOH_opt_freq_B3LYP_TZVP.chk
 Charge =  0 Multiplicity = 1
 C,0,-0.0034129784,-0.005882425,-0.0226397464
 H,0,-0.0157070631,-0.0272478243,1.0662310965
 H,0,1.0412968966,0.0211764806,-0.3537832998
 H,0,-0.5023072933,0.9124284006,-0.3537238415
 O,0,-0.6798383923,-1.177388187,-0.4651824412
 H,0,-0.6842380461,-1.1849459892,-1.4275679336
 Recover connectivity data from disk.

 GradGradGradGradGradGradGradGradGradGradGradGradGradGradGradGradGradGrad
 Berny optimization.
 Initialization pass.
                           ----------------------------
                           !    Initial Parameters    !
                           ! (Angstroms and Degrees)  !
 --------------------------                            --------------------------
 ! Name  Definition              Value          Derivative Info.                !
 --------------------------------------------------------------------------------
 ! R1    R(1,2)                  1.0891         calculate D2E/DX2 analytically  !
 ! R2    R(1,3)                  1.0963         calculate D2E/DX2 analytically  !
 ! R3    R(1,4)                  1.0963         calculate D2E/DX2 analytically  !
 ! R4    R(1,5)                  1.4233         calculate D2E/DX2 analytically  !
 ! R5    R(5,6)                  0.9624         calculate D2E/DX2 analytically  !
 ! A1    A(2,1,3)              108.2539         calculate D2E/DX2 analytically  !
 ! A2    A(2,1,4)              108.2539         calculate D2E/DX2 analytically  !
 ! A3    A(2,1,5)              106.8181         calculate D2E/DX2 analytically  !
 ! A4    A(3,1,4)              108.7705         calculate D2E/DX2 analytically  !
 ! A5    A(3,1,5)              112.2898         calculate D2E/DX2 analytically  !
 ! A6    A(4,1,5)              112.2898         calculate D2E/DX2 analytically  !
 ! A7    A(1,5,6)              108.6356         calculate D2E/DX2 analytically  !
 ! D1    D(2,1,5,6)           -179.9999         calculate D2E/DX2 analytically  !
 ! D2    D(3,1,5,6)            -61.4742         calculate D2E/DX2 analytically  !
 ! D3    D(4,1,5,6)             61.4743         calculate D2E/DX2 analytically  !
 --------------------------------------------------------------------------------
 Trust Radius=3.00D-01 FncErr=1.00D-07 GrdErr=1.00D-07
 Number of steps in this run=   2 maximum allowed number of steps=   2.
 GradGradGradGradGradGradGradGradGradGradGradGradGradGradGradGradGradGrad

                          Input orientation:                          
 ---------------------------------------------------------------------
 Center     Atomic     Atomic              Coordinates (Angstroms)
 Number     Number      Type              X           Y           Z
 ---------------------------------------------------------------------
    1          6             0       -0.003413   -0.005882   -0.022640
    2          1             0       -0.015707   -0.027248    1.066231
    3          1             0        1.041297    0.021176   -0.353783
    4          1             0       -0.502307    0.912428   -0.353724
    5          8             0       -0.679838   -1.177388   -0.465182
    6          1             0       -0.684238   -1.184946   -1.427568
 ---------------------------------------------------------------------
                    Distance matrix (angstroms):
                    1          2          3          4          5
     1  C    0.000000
     2  H    1.089150   0.000000
     3  H    1.096270   1.770888   0.000000
     4  H    1.096270   1.770888   1.782426   0.000000
     5  O    1.423313   2.027097   2.100303   2.100303   0.000000
     6  H    1.956409   2.829529   2.363306   2.363307   0.962425
                    6
     6  H    0.000000
 Stoichiometry    CH4O
 Framework group  C1[X(CH4O)]
 Deg. of freedom    12
 Full point group                 C1
 Largest Abelian subgroup         C1      NOp   1
 Largest concise Abelian subgroup C1      NOp   1
                         Standard orientation:                         
 ---------------------------------------------------------------------
 Center     Atomic     Atomic              Coordinates (Angstroms)
 Number     Number      Type              X           Y           Z
 ---------------------------------------------------------------------
    1          6             0       -0.666360   -0.020079    0.000000
    2          1             0       -1.084029    0.985804   -0.000001
    3          1             0       -1.031713   -0.543591   -0.891213
    4          1             0       -1.031713   -0.543589    0.891214
    5          8             0        0.749838    0.122060    0.000000
    6          1             0        1.146915   -0.754634    0.000000
 ---------------------------------------------------------------------
 Rotational constants (GHZ):    128.3922348     24.6647007     23.8113634
 Standard basis: TZVP (5D, 7F)
 There are    62 symmetry adapted basis functions of A   symmetry.
 Integral buffers will be    131072 words long.
 Raffenetti 2 integral format.
 Two-electron integral symmetry is turned on.
    62 basis functions,   102 primitive gaussians,    64 cartesian basis functions
     9 alpha electrons        9 beta electrons
       nuclear repulsion energy        40.2243341286 Hartrees.
 NAtoms=    6 NActive=    6 NUniq=    6 SFac= 7.50D-01 NAtFMM=   80 NAOKFM=F Big=F
 One-electron integrals computed using PRISM.
 NBasis=    62 RedAO= T  NBF=    62
 NBsUse=    62 1.00D-06 NBFU=    62
 Initial guess read from the checkpoint file:
 MetOH_opt_freq_B3LYP_TZVP.chk
 Initial guess orbital symmetries:
       Occupied  (A) (A) (A) (A) (A) (A) (A) (A) (A)
       Virtual   (A) (A) (A) (A) (A) (A) (A) (A) (A) (A) (A) (A)
                 (A) (A) (A) (A) (A) (A) (A) (A) (A) (A) (A) (A)
                 (A) (A) (A) (A) (A) (A) (A) (A) (A) (A) (A) (A)
                 (A) (A) (A) (A) (A) (A) (A) (A) (A) (A) (A) (A)
                 (A) (A) (A) (A) (A)
 Requested convergence on RMS density matrix=1.00D-08 within 128 cycles.
 Requested convergence on MAX density matrix=1.00D-06.
 Requested convergence on             energy=1.00D-06.
 No special actions if energy rises.
 Keep R1 integrals in memory in canonical form, NReq=     4038517.
 SCF Done:  E(RB+HF-LYP) =  -115.770990133     A.U. after    1 cycles
             Convg  =    0.2491D-08             -V/T =  2.0046
             S**2   =   0.0000
 Range of M.O.s used for correlation:     1    62
 NBasis=    62 NAE=     9 NBE=     9 NFC=     0 NFV=     0
 NROrb=     62 NOA=     9 NOB=     9 NVA=    53 NVB=    53

 **** Warning!!: The largest alpha MO coefficient is  0.11781621D+02

 Symmetrizing basis deriv contribution to polar:
 IMax=3 JMax=2 DiffMx= 0.00D+00
 G2DrvN: will do    7 centers at a time, making    1 passes doing MaxLOS=2.
 FoFDir/FoFCou used for L=0 through L=2.
 DoAtom=TTTTTT
          Differentiating once with respect to electric field.
                with respect to dipole field.
          Differentiating once with respect to nuclear coordinates.
          Store integrals in memory, NReq=     2984850.
          There are  21 degrees of freedom in the 1st order CPHF.
    18 vectors were produced by pass  0.
 AX will form  18 AO Fock derivatives at one time.
    18 vectors were produced by pass  1.
    18 vectors were produced by pass  2.
    18 vectors were produced by pass  3.
    18 vectors were produced by pass  4.
     7 vectors were produced by pass  5.
     3 vectors were produced by pass  6.
 Inv2:  IOpt= 1 Iter= 1 AM= 1.39D-15 Conv= 1.00D-12.
 Inverted reduced A of dimension  100 with in-core refinement.
 Isotropic polarizability for W=    0.000000       18.09 Bohr**3.
 End of Minotr Frequency-dependent properties file   721 does not exist.

 **********************************************************************

            Population analysis using the SCF density.

 **********************************************************************

 Orbital symmetries:
       Occupied  (A) (A) (A) (A) (A) (A) (A) (A) (A)
       Virtual   (A) (A) (A) (A) (A) (A) (A) (A) (A) (A) (A) (A)
                 (A) (A) (A) (A) (A) (A) (A) (A) (A) (A) (A) (A)
                 (A) (A) (A) (A) (A) (A) (A) (A) (A) (A) (A) (A)
                 (A) (A) (A) (A) (A) (A) (A) (A) (A) (A) (A) (A)
                 (A) (A) (A) (A) (A)
 The electronic state is 1-A.
 Alpha  occ. eigenvalues --  -19.12510 -10.21496  -1.02177  -0.68769  -0.51236
 Alpha  occ. eigenvalues --   -0.44397  -0.43015  -0.34113  -0.28029
 Alpha virt. eigenvalues --    0.02462   0.06587   0.11355   0.11635   0.13458
 Alpha virt. eigenvalues --    0.21204   0.22364   0.30749   0.36188   0.39515
 Alpha virt. eigenvalues --    0.44250   0.45880   0.47528   0.49988   0.51155
 Alpha virt. eigenvalues --    0.57822   0.77949   1.17751   1.22696   1.26794
 Alpha virt. eigenvalues --    1.28035   1.30069   1.45183   1.46727   1.51850
 Alpha virt. eigenvalues --    1.52296   1.75147   1.77108   1.78059   1.83638
 Alpha virt. eigenvalues --    1.95845   2.05392   2.16227   2.24346   2.35937
 Alpha virt. eigenvalues --    2.40561   2.42394   2.54441   2.59716   2.63050
 Alpha virt. eigenvalues --    2.66083   2.88143   2.95715   2.96516   3.06266
 Alpha virt. eigenvalues --    3.13081   3.20493   3.28608   3.30899   3.91282
 Alpha virt. eigenvalues --    4.30304  21.85406  43.35831
          Condensed to atoms (all electrons):
              1          2          3          4          5          6
     1  C    4.776554   0.394957   0.402776   0.402776   0.246525  -0.045025
     2  H    0.394957   0.586533  -0.036337  -0.036337  -0.046280   0.011213
     3  H    0.402776  -0.036337   0.643080  -0.056333  -0.046950  -0.007724
     4  H    0.402776  -0.036337  -0.056333   0.643081  -0.046950  -0.007724
     5  O    0.246525  -0.046280  -0.046950  -0.046950   8.010141   0.300325
     6  H   -0.045025   0.011213  -0.007724  -0.007724   0.300325   0.482788
 Mulliken atomic charges:
              1
     1  C   -0.178563
     2  H    0.126251
     3  H    0.101488
     4  H    0.101488
     5  O   -0.416810
     6  H    0.266147
 Sum of Mulliken charges=   0.00000
 Atomic charges with hydrogens summed into heavy atoms:
              1
     1  C    0.150663
     2  H    0.000000
     3  H    0.000000
     4  H    0.000000
     5  O   -0.150663
     6  H    0.000000
 Sum of Mulliken charges=   0.00000
 APT atomic charges:
              1
     1  C    0.505276
     2  H   -0.014412
     3  H   -0.070535
     4  H   -0.070535
     5  O   -0.597787
     6  H    0.247993
 Sum of APT charges=   0.00000
 APT Atomic charges with hydrogens summed into heavy atoms:
              1
     1  C    0.349794
     2  H    0.000000
     3  H    0.000000
     4  H    0.000000
     5  O   -0.349794
     6  H    0.000000
 Sum of APT charges=   0.00000
 Electronic spatial extent (au):  <R**2>=    84.9477
 Charge=     0.0000 electrons
 Dipole moment (field-independent basis, Debye):
    X=    -0.9062    Y=    -1.5978    Z=     0.0000  Tot=     1.8369
 Quadrupole moment (field-independent basis, Debye-Ang):
   XX=   -12.9856   YY=   -12.3403   ZZ=   -13.8861
   XY=    -2.3680   XZ=     0.0000   YZ=     0.0000
 Traceless Quadrupole moment (field-independent basis, Debye-Ang):
   XX=     0.0851   YY=     0.7304   ZZ=    -0.8154
   XY=    -2.3680   XZ=     0.0000   YZ=     0.0000
 Octapole moment (field-independent basis, Debye-Ang**2):
  XXX=     4.3166  YYY=    -0.5707  ZZZ=     0.0000  XYY=     1.7349
  XXY=    -2.4262  XXZ=     0.0000  XZZ=     0.3722  YZZ=    -0.6730
  YYZ=     0.0000  XYZ=     0.0000
 Hexadecapole moment (field-independent basis, Debye-Ang**3):
 XXXX=   -62.7450 YYYY=   -20.9052 ZZZZ=   -20.7431 XXXY=    -4.1009
 XXXZ=     0.0000 YYYX=    -3.0805 YYYZ=     0.0000 ZZZX=     0.0000
 ZZZY=     0.0000 XXYY=   -12.9501 XXZZ=   -14.6777 YYZZ=    -7.0935
 XXYZ=     0.0000 YYXZ=     0.0000 ZZXY=     0.0203
 N-N= 4.022433412862D+01 E-N=-3.520946646930D+02  KE= 1.152425095805D+02
  Exact polarizability:  19.346  -0.690  18.095   0.000   0.000  16.818
 Approx polarizability:  23.266  -0.782  22.967   0.000   0.000  20.377
 Full mass-weighted force constant matrix:
 Low frequencies ---   -0.0007   -0.0006    0.0006    1.8283    4.2931    5.5365
 Low frequencies ---  316.5949 1038.5873 1075.7388
 Diagonal vibrational polarizability:
        3.6322271       0.2373901      36.5323850
 Harmonic frequencies (cm**-1), IR intensities (KM/Mole), Raman scattering
 activities (A**4/AMU), depolarization ratios for plane and unpolarized
 incident light, reduced masses (AMU), force constants (mDyne/A),
 and normal coordinates:
                     1                      2                      3
                     A                      A                      A
 Frequencies --   316.5944              1038.5873              1075.7388
 Red. masses --     1.0710                 3.7331                 1.2712
 Frc consts  --     0.0633                 2.3725                 0.8667
 IR Inten    --   135.1939               122.7825                 2.6242
 Atom AN      X      Y      Z        X      Y      Z        X      Y      Z
   1   6     0.00   0.00   0.00     0.33  -0.02   0.00    -0.11  -0.08   0.00
   2   1     0.00   0.00   0.29     0.65   0.12   0.00     0.46   0.15   0.00
   3   1    -0.06   0.22  -0.10    -0.01   0.19  -0.02    -0.36   0.18  -0.05
   4   1     0.06  -0.22  -0.10    -0.01   0.19   0.02    -0.36   0.18   0.05
   5   8     0.00   0.00  -0.06    -0.32  -0.03   0.00     0.06   0.01   0.00
   6   1     0.00   0.00   0.89     0.42   0.32   0.00     0.59   0.25   0.00
                     4                      5                      6
                     A                      A                      A
 Frequencies --  1169.5648              1362.4028              1488.1949
 Red. masses --     1.2668                 1.2966                 1.1193
 Frc consts  --     1.0210                 1.4179                 1.4606
 IR Inten    --     0.2392                21.0624                 5.9979
 Atom AN      X      Y      Z        X      Y      Z        X      Y      Z
   1   6     0.00   0.00   0.14    -0.04   0.12   0.00    -0.10   0.01   0.00
   2   1     0.00   0.00  -0.27    -0.41  -0.03   0.00     0.63   0.29   0.00
   3   1     0.63   0.12  -0.19     0.18  -0.20   0.11     0.42  -0.27  -0.03
   4   1    -0.63  -0.12  -0.19     0.18  -0.20  -0.11     0.42  -0.27   0.03
   5   8     0.00   0.00  -0.06    -0.02  -0.08   0.00    -0.02   0.01   0.00
   6   1     0.00   0.00  -0.01     0.75   0.28   0.00    -0.05  -0.01   0.00
                     7                      8                      9
                     A                      A                      A
 Frequencies --  1491.5861              1507.0039              2989.8891
 Red. masses --     1.0481                 1.0540                 1.0368
 Frc consts  --     1.3738                 1.4103                 5.4608
 IR Inten    --     2.1677                 4.5380                62.9190
 Atom AN      X      Y      Z        X      Y      Z        X      Y      Z
   1   6     0.00   0.00  -0.06     0.04   0.04   0.00    -0.04  -0.03   0.00
   2   1     0.00   0.00   0.73     0.17   0.08   0.00     0.09  -0.24   0.00
   3   1     0.31  -0.37   0.06    -0.36  -0.43   0.41     0.21   0.32   0.56
   4   1    -0.31   0.37   0.06    -0.36  -0.43  -0.41     0.21   0.32  -0.56
   5   8     0.00   0.00  -0.01     0.01   0.02   0.00     0.00   0.00   0.00
   6   1     0.00   0.00  -0.01    -0.10  -0.03   0.00     0.00   0.00   0.00
                    10                     11                     12
                     A                      A                      A
 Frequencies --  3034.6324              3115.6041              3820.4226
 Red. masses --     1.1055                 1.0963                 1.0666
 Frc consts  --     5.9982                 6.2702                 9.1726
 IR Inten    --    69.5905                29.1543                23.3591
 Atom AN      X      Y      Z        X      Y      Z        X      Y      Z
   1   6     0.00   0.00   0.09     0.02  -0.09   0.00     0.00   0.00   0.00
   2   1     0.00   0.00   0.03    -0.36   0.90   0.00     0.00   0.01   0.00
   3   1    -0.22  -0.35  -0.57     0.05   0.07   0.15     0.00   0.00   0.00
   4   1     0.22   0.35  -0.57     0.05   0.07  -0.15     0.00   0.00   0.00
   5   8     0.00   0.00   0.00     0.00   0.00   0.00     0.03  -0.06   0.00
   6   1     0.00   0.00   0.00     0.00  -0.02   0.00    -0.42   0.90   0.00

 -------------------
 - Thermochemistry -
 -------------------
 Temperature   298.150 Kelvin.  Pressure   1.00000 Atm.
 Atom  1 has atomic number  6 and mass  12.00000
 Atom  2 has atomic number  1 and mass   1.00783
 Atom  3 has atomic number  1 and mass   1.00783
 Atom  4 has atomic number  1 and mass   1.00783
 Atom  5 has atomic number  8 and mass  15.99491
 Atom  6 has atomic number  1 and mass   1.00783
 Molecular mass:    32.02621 amu.
 Principal axes and moments of inertia in atomic units:
                           1         2         3
     EIGENVALUES --    14.05647  73.17102  75.79327
           X            0.99896  -0.04555   0.00000
           Y            0.04555   0.99896   0.00000
           Z            0.00000   0.00000   1.00000
 This molecule is an asymmetric top.
 Rotational symmetry number  1.
 Rotational temperatures (Kelvin)      6.16185     1.18372     1.14276
 Rotational constants (GHZ):         128.39223    24.66470    23.81136
 Zero-point vibrational energy     134042.9 (Joules/Mol)
                                   32.03702 (Kcal/Mol)
 Warning -- explicit consideration of   1 degrees of freedom as
           vibrations may cause significant error
 Vibrational temperatures:    455.51  1494.29  1547.75  1682.74  1960.19
          (Kelvin)           2141.18  2146.06  2168.24  4301.78  4366.15
                             4482.65  5496.73
 
 Zero-point correction=                           0.051054 (Hartree/Particle)
 Thermal correction to Energy=                    0.054388
 Thermal correction to Enthalpy=                  0.055333
 Thermal correction to Gibbs Free Energy=         0.028298
 Sum of electronic and zero-point Energies=           -115.719936
 Sum of electronic and thermal Energies=              -115.716602
 Sum of electronic and thermal Enthalpies=            -115.715658
 Sum of electronic and thermal Free Energies=         -115.742692
 
                     E (Thermal)             CV                S
                      KCal/Mol        Cal/Mol-Kelvin    Cal/Mol-Kelvin
 Total                   34.129              8.816             56.899
 Electronic               0.000              0.000              0.000
 Translational            0.889              2.981             36.324
 Rotational               0.889              2.981             18.995
 Vibrational             32.352              2.855              1.580
 Vibration  1             0.703              1.642              1.328
                       Q            Log10(Q)             Ln(Q)
 Total Bot       0.963581D-13        -13.016112        -29.970705
 Total V=0       0.293197D+11         10.467159         24.101525
 Vib (Bot)       0.427962D-23        -23.368595        -53.808178
 Vib (Bot)  1    0.594968D+00         -0.225506         -0.519247
 Vib (V=0)       0.130220D+01          0.114676          0.264052
 Vib (V=0)  1    0.127717D+01          0.106247          0.244644
 Electronic      0.100000D+01          0.000000          0.000000
 Translational   0.712383D+07          6.852714         15.778956
 Rotational      0.316060D+04          3.499769          8.058517
 ***** Axes restored to original set *****
 -------------------------------------------------------------------
 Center     Atomic                   Forces (Hartrees/Bohr)
 Number     Number              X              Y              Z
 -------------------------------------------------------------------
    1          6           0.000000006    0.000000027    0.000000148
    2          1          -0.000000061   -0.000000103    0.000000021
    3          1           0.000000043   -0.000000014    0.000000022
    4          1          -0.000000028    0.000000025    0.000000022
    5          8           0.000000001   -0.000000013   -0.000000125
    6          1           0.000000039    0.000000079   -0.000000088
 -------------------------------------------------------------------
 Cartesian Forces:  Max     0.000000148 RMS     0.000000064

 GradGradGradGradGradGradGradGradGradGradGradGradGradGradGradGradGradGrad
 Berny optimization.
 Internal  Forces:  Max     0.000000050 RMS     0.000000030
 Search for a local minimum.
 Step number   1 out of a maximum of   2
 All quantities printed in internal units (Hartrees-Bohrs-Radians)
 Second derivative matrix not updated -- analytic derivatives used.
 The second derivative matrix:
                          R1        R2        R3        R4        R5
           R1           0.34221
           R2           0.00370   0.32265
           R3           0.00370   0.00469   0.32265
           R4           0.01174   0.01724   0.01724   0.33893
           R5          -0.00190  -0.00010  -0.00010  -0.00225   0.52414
           A1           0.00626   0.00816  -0.00537  -0.02827  -0.00032
           A2           0.00626  -0.00537   0.00816  -0.02827  -0.00032
           A3           0.00252  -0.00450  -0.00450   0.02984   0.00688
           A4          -0.00450   0.00839   0.00839  -0.02842   0.00127
           A5          -0.00474  -0.00195  -0.00470   0.02605  -0.00362
           A6          -0.00474  -0.00470  -0.00195   0.02605  -0.00362
           A7           0.00317   0.00032   0.00032   0.04857   0.01480
           D1           0.00000  -0.00565   0.00565   0.00000   0.00000
           D2           0.00654   0.00037  -0.00641  -0.00091   0.00189
           D3          -0.00654   0.00641  -0.00037   0.00091  -0.00189
                          A1        A2        A3        A4        A5
           A1           0.07088
           A2           0.00432   0.07088
           A3          -0.03875  -0.03875   0.13796
           A4           0.00497   0.00497  -0.00116   0.07285
           A5          -0.03564  -0.00178  -0.02950  -0.04038   0.13601
           A6          -0.00178  -0.03564  -0.02950  -0.04038  -0.03296
           A7          -0.00572  -0.00572   0.02054   0.00106  -0.00506
           D1          -0.02042   0.02042   0.00000   0.00000  -0.01875
           D2           0.02143   0.00024   0.02301  -0.01755  -0.00377
           D3          -0.00024  -0.02143  -0.02301   0.01755   0.02072
                          A6        A7        D1        D2        D3
           A6           0.13601
           A7          -0.00506   0.17655
           D1           0.01875   0.00000   0.02466
           D2          -0.02072   0.00311  -0.01090   0.02764
           D3           0.00377  -0.00311  -0.01090  -0.01396   0.02764
     Eigenvalues ---    0.00279   0.08761   0.08764   0.12941   0.15315
     Eigenvalues ---    0.18213   0.19726   0.31927   0.32290   0.34050
     Eigenvalues ---    0.38392   0.525081000.000001000.000001000.00000
 Angle between quadratic step and forces=  90.00 degrees.
 Linear search not attempted -- first point.
 Iteration  1 RMS(Cart)=  0.00000037 RMS(Int)=  0.00000000
 Variable       Old X    -DE/DX   Delta X   Delta X   Delta X     New X
                                 (Linear)    (Quad)   (Total)
    R1        2.05819   0.00000   0.00000   0.00000   0.00000   2.05819
    R2        2.07165   0.00000   0.00000   0.00000   0.00000   2.07165
    R3        2.07165   0.00000   0.00000   0.00000   0.00000   2.07165
    R4        2.68967   0.00000   0.00000   0.00000   0.00000   2.68967
    R5        1.81872   0.00000   0.00000   0.00000   0.00000   1.81872
    A1        1.88939   0.00000   0.00000   0.00000   0.00000   1.88939
    A2        1.88939   0.00000   0.00000   0.00000   0.00000   1.88939
    A3        1.86433   0.00000   0.00000   0.00000   0.00000   1.86433
    A4        1.89840   0.00000   0.00000   0.00000   0.00000   1.89840
    A5        1.95983   0.00000   0.00000   0.00000   0.00000   1.95983
    A6        1.95983   0.00000   0.00000   0.00000   0.00000   1.95983
    A7        1.89605   0.00000   0.00000   0.00000   0.00000   1.89605
    D1       -3.14159   0.00000   0.00000   0.00000   0.00000   3.14159
    D2       -1.07293   0.00000   0.00000   0.00000   0.00000  -1.07293
    D3        1.07293   0.00000   0.00000   0.00000   0.00000   1.07293
         Item               Value     Threshold  Converged?
 Maximum Force            0.000000     0.000015     YES
 RMS     Force            0.000000     0.000010     YES
 Maximum Displacement     0.000001     0.000060     YES
 RMS     Displacement     0.000000     0.000040     YES
 Predicted change in Energy=-4.273188D-14
 Optimization completed.
    -- Stationary point found.
                           ----------------------------
                           !   Optimized Parameters   !
                           ! (Angstroms and Degrees)  !
 --------------------------                            --------------------------
 ! Name  Definition              Value          Derivative Info.                !
 --------------------------------------------------------------------------------
 ! R1    R(1,2)                  1.0891         -DE/DX =    0.0                 !
 ! R2    R(1,3)                  1.0963         -DE/DX =    0.0                 !
 ! R3    R(1,4)                  1.0963         -DE/DX =    0.0                 !
 ! R4    R(1,5)                  1.4233         -DE/DX =    0.0                 !
 ! R5    R(5,6)                  0.9624         -DE/DX =    0.0                 !
 ! A1    A(2,1,3)              108.2539         -DE/DX =    0.0                 !
 ! A2    A(2,1,4)              108.2539         -DE/DX =    0.0                 !
 ! A3    A(2,1,5)              106.8181         -DE/DX =    0.0                 !
 ! A4    A(3,1,4)              108.7705         -DE/DX =    0.0                 !
 ! A5    A(3,1,5)              112.2898         -DE/DX =    0.0                 !
 ! A6    A(4,1,5)              112.2898         -DE/DX =    0.0                 !
 ! A7    A(1,5,6)              108.6356         -DE/DX =    0.0                 !
 ! D1    D(2,1,5,6)            180.0001         -DE/DX =    0.0                 !
 ! D2    D(3,1,5,6)            -61.4742         -DE/DX =    0.0                 !
 ! D3    D(4,1,5,6)             61.4743         -DE/DX =    0.0                 !
 --------------------------------------------------------------------------------
 GradGradGradGradGradGradGradGradGradGradGradGradGradGradGradGradGradGrad

 1\1\RECHENZENTRUM RWTH AACHEN-SRVMBFD\Freq\RB3LYP\TZVP\C1H4O1\JENS\29-
 Jun-2012\0\\#N Geom=AllCheck Guess=Read SCRF=Check GenChk RB3LYP/TZVP 
 Freq\\Title Card Required\\0,1\C,-0.0034129773,-0.0058824257,-0.022639
 7464\H,-0.0157070631,-0.0272478243,1.0662310965\H,1.0412968966,0.02117
 64806,-0.3537832998\H,-0.5023072933,0.9124284006,-0.3537238415\O,-0.67
 98383896,-1.1773881885,-0.4651824412\H,-0.6842380461,-1.1849459892,-1.
 4275679336\\Version=AM64L-G03RevE.01\State=1-A\HF=-115.7709901\RMSD=2.
 491e-09\RMSF=6.366e-08\ZeroPoint=0.0510542\Thermal=0.0543884\Dipole=0.
 2901231,0.5025061,-0.4308319\DipoleDeriv=0.4950137,0.1676864,0.074412,
 0.1676841,0.6886038,0.1288822,0.1076524,0.186453,0.3322092,0.0597794,-
 0.0184991,0.0094859,-0.0184976,0.038422,0.0164433,-0.0127179,-0.022012
 6,-0.1414388,-0.2167885,-0.0580238,0.0439423,-0.0284312,-0.0151796,-0.
 0369049,0.0723875,-0.0086834,0.0203644,-0.0281447,0.0804781,-0.0539252
 ,0.0508829,-0.2038317,0.019595,-0.0437063,0.0583378,0.0203726,-0.65294
 36,-0.1109542,-0.1061102,-0.1109518,-0.7810278,-0.1837924,-0.1397854,-
 0.2421162,-0.3593885,0.3430838,-0.0606874,0.0321953,-0.0606863,0.27301
 32,0.0557769,0.0161697,0.0280214,0.1278811\Polar=17.2715057,0.7853438,
 18.1781691,0.4634206,0.8024929,18.8098668\PG=C01 [X(C1H4O1)]\NImag=0\\
 0.53138115,-0.03851176,0.48691938,-0.01723702,-0.02985609,0.59127955,-
 0.05013865,0.00090919,0.01340469,0.05026586,0.00090961,-0.04909026,0.0
 2323391,0.00631179,0.05755389,0.00701493,0.01216714,-0.31499786,-0.004
 13228,-0.00717662,0.34198173,-0.26785371,0.00743298,0.07565138,0.00051
 818,0.00129163,0.00107986,0.29611868,0.00976921,-0.05085977,-0.0033275
 3,-0.00163016,0.00129968,0.00168540,0.00367082,0.05733128,0.07684213,-
 0.00053776,-0.08002721,0.03077360,-0.00137130,-0.00849759,-0.08101701,
 0.00415957,0.07613253,-0.11255176,0.09943028,-0.04069901,0.00125001,-0
 .00120569,0.00091916,-0.01390410,0.02463615,-0.01062214,0.11384401,0.0
 9709385,-0.20617062,0.06384447,0.00171529,0.00056601,0.00177805,0.0025
 8126,0.00180838,0.00134872,-0.10156165,0.23961557,-0.03887833,0.066270
 35,-0.08001827,-0.01657358,0.02596627,-0.00849577,0.00647984,-0.008526
 53,0.00480145,0.04410181,-0.06807389,0.07612289,-0.09839138,-0.0667222
 4,-0.00817935,-0.00048067,-0.00404746,-0.00393754,-0.01498291,-0.03694
 195,-0.01474989,0.01071499,0.00020913,0.00378164,0.11555315,-0.0667208
 1,-0.17542283,-0.01416339,-0.00404629,-0.00515110,-0.00681874,-0.01462
 539,-0.01049070,-0.00414805,-0.02210831,-0.03618757,-0.01484813,0.1241
 2598,0.25885991,-0.03052654,-0.05286758,-0.10379035,-0.02173073,-0.037
 63565,-0.01182737,-0.00263615,0.00440256,0.00639777,0.00512981,-0.0000
 8339,0.00639677,0.03196289,0.05532100,0.61855287,-0.00244565,-0.002538
 45,-0.02294070,-0.00141473,-0.00325988,-0.00094411,0.00010386,0.000495
 92,-0.00122668,0.00064684,-0.00003787,0.00108862,-0.01241318,-0.016625
 18,0.01780072,0.01552285,-0.00254011,-0.00537590,-0.03973137,-0.003259
 82,-0.00517823,-0.00163523,-0.00035129,0.00091113,0.00054882,0.0008092
 2,0.00036824,-0.00078806,-0.01662346,-0.03160771,0.03086305,0.02196546
 ,0.04088247,0.00278483,0.00482394,-0.01244585,-0.00174169,-0.00301661,
 0.00183687,0.00044208,0.00160653,0.00119306,0.00117037,0.00118604,0.00
 119293,-0.00887775,-0.01534268,-0.51572968,0.00622215,0.01074279,0.523
 95268\\0.,-0.00000003,-0.00000015,0.00000006,0.00000010,-0.00000002,-0
 .00000004,0.00000001,-0.00000002,0.00000003,-0.00000002,-0.00000002,0.
 ,0.00000001,0.00000012,-0.00000004,-0.00000008,0.00000009\\\@


 KNOWING HOW CONTENTED, FREE, AND JOYFUL IS LIFE IN
 THE REALMS OF SCIENCE, ONE FERVENTLY WISHES THAT
 MANY WOULD ENTER HER PORTALS.
   --  DMITRI IVANOVICH MENDELEEV
 "FIRST PRINCIPLES OF CHEMISTRY", LONGMANS, GREEN,
 AND CO.  LONDON, 1891
 Job cpu time:  0 days  0 hours  1 minutes 48.9 seconds.
 File lengths (MBytes):  RWF=     18 Int=      0 D2E=      0 Chk=     10 Scr=      1
 Normal termination of Gaussian 03 at Fri Jun 29 09:41:55 2012.
